# Supplementary material for: Transcriptional landscape of myogenesis from human pluripotent stem cells reveals a key role of TWIST1 in maintenance of skeletal muscle progenitors
Source: eLife. 2020 Feb 3;9:e46981. doi: 10.7554/eLife.46981 (PMC6996923; doi:10.7554/eLife.46981)
Supplement: Supplementary file 1. [file elife-46981-supp1.xlsx]

## Sheet: Gene expression level
GeneID	Gene Name	Gene Locus	Gene Class	Gene Length	OCT4-1 FPKM	OCT4-2 FPKM	OCT4-3 FPKM	OCT4-4 FPKM	MSGN1-1 FPKM	MSGN1-2 FPKM	MSGN1-3 FPKM	MSGN1-4 FPKM	PAX7-1 FPKM	PAX7-3 FPKM	PAX7-4 FPKM	PAX7-5 FPKM	MYOG-1 FPKM	MYOG-3 FPKM	MYOG-4 FPKM	MYOG-5 FPKM	TUBE-1 FPKM	TUBE-3 FPKM	TUBE-4 FPKM	TUBE-5 FPKM
ENSG00000000003	TSPAN6	chrX:99883666-99894988	protein_coding	2968	19.2739	15.3233	36.5853	30.8656	23.3179	25.516	42.05	38.3857	15.5863	12.2008	19.4252	20.4642	11.9156	9.1599	13.1843	13.6925	9.4354	8.8747	15.9636	15.1292
ENSG00000000005	TNMD	chrX:99839798-99854882	protein_coding	1610	0.3301	0.5937	0.9212	0.7177	0.3177	0.4273	0.317	0.1469	0.3476	0.8631	0.3338	0.9124	0.7731	0.0733	0.2495	0.1622	0.1682	0.5212	0.0728	0.0652
ENSG00000000419	DPM1	chr20:49551403-49575092	protein_coding	1207	27.8201	20.2571	55.0127	49.9162	21.9787	22.4861	44.4449	41.5529	24.4177	18.9626	30.6838	41.2363	16.3184	18.8107	30.7561	27.289	13.6427	15.1407	43.3594	42.3773
ENSG00000000457	SCYL3	chr1:169818771-169863408	protein_coding	6876	1.2718	1.0829	1.7381	1.8719	1.7005	1.819	2.4847	2.6198	2.0346	1.8308	2.686	2.0816	1.7677	1.7668	1.6747	1.93	0.9138	1.078	1.7354	1.7939
ENSG00000000460	C1orf112	chr1:169631244-169823221	protein_coding	6354	4.3342	3.27	6.1588	4.9456	3.7035	3.4644	4.4518	4.6222	4.2714	3.3706	2.3684	4.5537	1.3943	1.0673	0.8271	1.4928	0.2302	0.4182	0.7937	0.7641
ENSG00000000938	FGR	chr1:27938574-27961788	protein_coding	3474	0.0417	0.029	0.0493	0.0277	0	0	0	0.0097	0	0	0.0141	0	0.0632	0.017	0	0	0.0312	0	0.0084	0
ENSG00000000971	CFH	chr1:196621007-196716634	protein_coding	8144	0	0.0062	0	0.0039	0	0	0.0033	0.0166	29.5237	25.3538	24.0157	17.0343	3.902	5.3078	4.361	6.7318	3.7047	8.2088	29.258	27.1495
ENSG00000001036	FUCA2	chr6:143815947-143832827	protein_coding	3119	16.5439	14.0169	23.2551	21.7455	10.0518	11.0677	15.2357	14.0973	6.1898	4.9795	6.8926	7.5791	3.7561	2.1177	3.7992	3.6968	8.4576	6.4122	17.8322	17.4847
ENSG00000001084	GCLC	chr6:53362138-53481768	protein_coding	8463	4.3217	4.0364	7.0472	6.645	3.8773	3.7612	4.374	4.4168	2.8433	2.3857	2.904	3.9033	1.9726	1.7351	3.188	3.0797	1.3377	1.0852	1.6837	1.597
ENSG00000001167	NFYA	chr6:41040683-41067715	protein_coding	3811	11.2325	8.4355	17.9772	16.3061	10.9496	11.3389	21.0687	21.9843	15.2466	17.1163	24.436	25.4211	9.2222	7.4741	13.7374	13.6207	3.0843	4.9543	9.0396	8.6699
ENSG00000001460	STPG1	chr1:24683488-24743424	protein_coding	8514	1.0669	1.1582	1.5176	1.4741	1.279	0.9475	1.098	1.179	0.4053	0.3264	0.4132	0.313	0.4988	0.1385	0.2988	0.3526	0.1845	0.1643	0.1963	0.2651
ENSG00000001461	NIPAL3	chr1:24742283-24799466	protein_coding	9404	1.3255	1.7119	1.7288	1.9763	0.4974	0.5985	0.5884	0.5067	1.1505	0.8866	1.2365	0.6502	1.1446	0.2383	1.0714	0.9994	2.9376	1.6112	2.4942	2.467
ENSG00000001497	LAS1L	chrX:64732461-64754655	protein_coding	5589	12.1803	10.2527	18.8211	17.4075	10.1861	9.5779	15.414	14.5793	7.1089	6.8301	8.6896	9.7305	6.0526	4.1151	5.7437	6.6096	2.1128	2.6192	5.2092	5.1276
ENSG00000001561	ENPP4	chr6:46097729-46114436	protein_coding	4651	1.8387	2.2283	3.0847	3.1816	0.5971	0.6454	0.5025	0.545	1.7647	1.8981	2.7523	2.3577	3.0856	5.0465	6.5134	7.1941	2.3176	2.6663	1.4751	1.2809
ENSG00000001617	SEMA3F	chr3:50192477-50226508	protein_coding	4826	5.306	5.5355	3.1915	4.3831	9.5402	13.3599	12.3627	7.4372	4.8315	4.6071	4.4445	2.9093	4.7337	1.0753	1.7202	1.9294	0.9091	2.1542	2.1628	2.2568
ENSG00000001626	CFTR	chr7:117105837-117356025	protein_coding	8099	0.2327	0.3416	0.7255	0.5747	0	0.0077	0.0033	0.0167	0.0345	0.0202	0.0302	0.0253	0.0633	0.0655	0.0827	0.0967	0.0134	0.0345	0	0
ENSG00000001629	ANKIB1	chr7:91875547-92030698	protein_coding	7130	9.6833	8.947	12.4331	12.9384	6.3446	7.7359	10.3081	10.6652	10.2423	9.0226	11.5947	11.0819	6.9729	3.9949	6.8638	7.1827	4.7178	4.9954	11.115	10.5528
ENSG00000001630	CYP51A1	chr7:91741464-91772266	protein_coding	4074	1.8382	1.7659	2.4364	2.3085	3.0854	2.9626	4.0288	4.3552	2.1062	2.8291	2.7104	4.0919	1.3659	1.4041	1.8898	2.2322	0.3723	1.808	1.4969	1.4365
ENSG00000001631	KRIT1	chr7:91828282-91875480	protein_coding	6204	6.1367	5.7818	9.0983	8.5058	6.7262	6.6629	7.9757	8.8142	9.1853	7.7737	8.8048	8.1052	5.7358	4.0209	7.4081	7.2308	2.305	3.0433	5.0141	4.6236
ENSG00000002016	RAD52	chr12:1021242-1099219	protein_coding	4190	3.2633	3.1218	4.2341	3.4014	4.0465	5.2089	6.424	5.7269	4.1402	4.2529	6.775	2.9677	4.6833	2.9416	7.6375	7.7157	1.0988	1.4131	1.3505	1.735
ENSG00000002079	MYH16	chr7:98836416-98908753	pseudogene	6387	0	0	0	0	0	0	0	0	0	0	0	0	0	0.0092	0.0105	0.0136	0.0594	0	0.0184	0.0041
ENSG00000002330	BAD	chr11:64037301-64052176	protein_coding	1708	5.3746	5.1841	2.6719	2.6874	5.5623	5.6751	3.2556	4.4521	7.8086	8.0402	4.2337	5.5801	6.1732	5.0065	4.096	3.9486	8.0553	7.1785	6.9522	7.8209
ENSG00000002549	LAP3	chr4:17578814-17609595	protein_coding	3785	11.9479	8.8257	20.1202	17.1136	10.5035	9.8307	14.755	14.5366	9.2158	8.4658	10.8304	14.6842	5.0684	7.8682	4.5723	5.7133	7.1411	8.4617	17.7	16.9043
ENSG00000002586	CD99	chrX:2609219-2659350	protein_coding	3284	15.1242	15.2123	10.6134	13.811	23.2772	21.9182	18.3066	18.4935	20.2494	18.6434	16.9014	15.2392	28.0708	17.5446	27.2052	25.9026	49.8948	36.0294	76.6906	78.6519
ENSG00000002587	HS3ST1	chr4:11394773-11431389	protein_coding	8166	0.0355	0.0308	0.0838	0.0118	0.0447	0.0306	0.0526	0.0331	0.0114	0.01	0.0538	0.092	0.1614	0.0144	0.0082	0.0107	0.0398	0.2912	0.0934	0.1735
ENSG00000002726	AOC1	chr7:150521714-150558592	protein_coding	3824	0.0126	0.0395	0	0.0084	0	0	0	0	0	0	0.0383	0.0447	0.134	0	0	0	2.6064	0	0.0843	0.0892
ENSG00000002745	WNT16	chr7:120965420-120981158	protein_coding	3261	0	0.0309	0.0087	0.0394	0	0	0.0082	0.0415	0	0	0.1049	0.0629	0.2021	0.0181	0	0	0	0.0286	0.3506	0.2817
ENSG00000002746	HECW1	chr7:43152197-43605600	protein_coding	13965	0.4636	0.2702	0.1981	0.2321	0.0209	0.009	0.0231	0.0218	0.0334	0	0.0105	0.0514	0.2097	0.0296	0.012	0.0156	0.128	0.0334	0.0273	0.0338
ENSG00000002822	MAD1L1	chr7:1855428-2272878	protein_coding	6955	3.4387	3.4504	3.5761	3.346	4.14	3.9293	4.1443	4.2276	4.1437	3.9725	3.7584	4.1504	2.8635	2.637	2.1418	2.1521	1.324	2.0712	1.994	2.0867
ENSG00000002834	LASP1	chr17:37026111-37078023	protein_coding	7061	21.9782	17.7767	21.4333	21.0565	7.1	6.5893	8.6588	7.5864	14.6748	13.2784	12.5798	14.6977	8.9179	1.946	3.6314	3.3152	11.4916	9.5801	21.9614	22.3116
ENSG00000002919	SNX11	chr17:46180718-46200436	protein_coding	3606	3.8454	3.0135	6.6916	5.2607	2.2293	2.4106	3.1586	3.4865	1.6294	2.0855	2.6421	3.6188	2.0711	2.2732	3.7224	3.2217	2.1631	1.81	5.6915	4.8325
ENSG00000002933	TMEM176A	chr7:150497490-150502208	protein_coding	3479	0.0139	0.0289	0.0902	0.0185	0	0	0	0	0.134	0.7049	0.6601	0.2455	0.3578	0.0509	0.0385	0.0625	2.9115	0	0.1348	0.1509
ENSG00000003056	M6PR	chr12:9092958-9102551	protein_coding	3777	20.9787	17.0761	28.6811	27.6283	21.961	20.299	29.0675	28.5979	15.6061	12.942	17.5412	19.3641	14.2874	14.3021	18.5494	17.3261	14.4273	14.4166	24.9334	24.8126
ENSG00000003096	KLHL13	chrX:117031775-117251303	protein_coding	6983	2.4009	1.7939	2.9164	2.5098	2.5013	2.418	3.7276	3.6928	5.663	6.4382	9.6767	10.826	11.4921	16.5357	21.6864	22.3443	0.3258	3.6986	1.163	1.0974
ENSG00000003137	CYP26B1	chr2:72356366-72375167	protein_coding	5015	0.0578	0.0502	0.0227	0.0576	0.1166	0.1372	0.2357	0.3033	0.2976	0.4401	0.5748	0.2588	0.7446	0.2352	0.5273	0.2863	0.3456	0.0651	0.1111	0.1832
ENSG00000003147	ICA1	chr7:8152813-8302317	protein_coding	4891	2.2127	2.7155	3.4815	4.0164	0.0747	0.1534	0.1538	0.1106	0.0572	0.0501	0.01	0.0978	0.4042	0.0362	0.0411	0.0089	0.0111	0.0667	0.006	0.0161
ENSG00000003249	DBNDD1	chr16:90071272-90086536	protein_coding	3522	8.9853	11.856	9.6371	10.7815	1.1827	1.2607	0.6712	0.6045	2.4098	2.8083	1.8728	2.6091	5.0726	9.5776	5.1133	6.4612	3.4912	4.0637	5.1862	5.8047
ENSG00000003393	ALS2	chr2:202565276-202645912	protein_coding	10381	6.1156	5.5296	8.5449	8.7629	4.8364	4.9337	5.9776	6.1108	5.5433	5.5277	6.5186	6.3083	6.3974	7.4476	8.4257	8.7098	4.0647	6.9024	9.5688	9.0151
ENSG00000003400	CASP10	chr2:202047603-202094129	protein_coding	7598	0.3052	0.2913	0.3153	0.3422	0.0481	0.0329	0.0707	0.1068	0	0.0108	0.0193	0.036	0.0482	0	0.0308	0.0802	0.0071	0.0123	0.0424	0.076
ENSG00000003402	CFLAR	chr2:201980826-202041410	protein_coding	22528	0.4825	0.565	0.5394	0.5685	0.4379	0.458	0.3458	0.4186	0.7576	0.6604	0.7005	0.3761	1.0401	0.5733	1.4874	1.4408	1.0435	0.8795	0.8472	0.8259
ENSG00000003436	TFPI	chr2:188328956-188430487	protein_coding	11714	1.3157	0.6013	1.5778	1.0851	0.2683	0.3844	0.6008	1.0733	0.1513	0.2721	0.171	0.1225	0.3438	0.0252	0.1	0.078	3.5236	4.2067	10.3771	10.0235
ENSG00000003509	NDUFAF7	chr2:37458773-37480546	protein_coding	3651	16.727	18.3544	25.296	30.1907	6.4654	6.7658	9.4619	10.2381	6.5396	6.0003	8.2837	6.3344	5.1541	3.6828	6.8855	6.6381	2.1661	3.4732	5.9907	6.0884
ENSG00000003756	RBM5	chr3:50126340-50156454	protein_coding	10368	10.2846	9.6125	14.9985	13.8666	14.2665	15.4772	17.4991	16.9114	17.6764	19.4422	23.0442	13.0179	18.2698	12.7866	19.3553	20.165	5.3707	8.2061	11.433	11.0818
ENSG00000003987	MTMR7	chr8:17155538-17271037	protein_coding	5692	2.0032	1.9268	2.741	3.0001	0.0128	0.022	0.0425	0.0475	0.0819	0.0431	0.1803	0.162	0.283	0.1658	0.1294	0.1988	0.0095	0.0164	0.0258	0.0046
ENSG00000003989	SLC7A2	chr8:17354596-17428082	protein_coding	7905	7.2854	6.3833	7.8983	8.7626	4.6409	4.5488	5.7803	6.7038	7.6454	8.2208	9.7533	8.4916	3.4549	2.059	7.0505	6.6271	0.2878	2.3	1.083	0.9495
ENSG00000004059	ARF5	chr7:127228398-127231759	protein_coding	1871	27.5532	26.6739	33.1416	30.9319	26.2091	26.3715	29.0882	29.8228	19.6901	22.4125	22.3536	20.942	19.9977	17.7139	13.4361	13.8835	14.099	13.6046	19.4156	21.1522
ENSG00000004139	SARM1	chr17:26691377-26728065	protein_coding	8132	0.8021	0.7053	0.6594	0.5171	1.1413	1.3842	0.5979	0.7896	2.787	3.3976	1.2197	1.9954	2.0619	1.0298	0.4775	0.5779	0.6461	0.7625	0.7319	0.8972
ENSG00000004142	POLDIP2	chr17:26673658-26684545	protein_coding	2662	19.3115	18.0297	22.3294	22.4159	18.9428	19.71	22.6446	21.9006	19.6903	19.9289	19.1986	25.2934	15.0732	18.5204	17.1519	15.6424	17.9267	18.1785	24.8365	24.7947
ENSG00000004399	PLXND1	chr3:129274017-129325661	protein_coding	9738	6.3755	5.7552	2.8909	4.2653	3.94	4.7329	3.8647	3.8454	6.3116	7.9745	6.4122	3.9746	2.9399	0.6601	1.454	1.8632	4.9784	2.3027	4.733	5.3011
ENSG00000004455	AK2	chr1:33473584-33546597	protein_coding	5683	10.7886	10.6851	17.8372	16.6451	11.2392	11.4663	14.2137	12.2805	12.5055	12.298	17.4614	19.8665	8.452	9.5677	11.1737	12.1966	0.1334	8.0803	27.2917	26.9459
ENSG00000004468	CD38	chr4:15779897-15854853	protein_coding	6855	0.0423	0.044	0.0166	0.0609	0.0533	0.0182	0.0157	0.0197	0	0.0119	0	0.005	0.032	0	0.0049	0.019	0.0079	0.0476	0.0342	0.0459
ENSG00000004478	FKBP4	chr12:2904118-2914576	protein_coding	3958	54.1255	41.1829	67.5733	66.9219	34.1769	36.3083	57.757	58.6448	24.7422	27.4677	29.9229	40.5217	12.3391	14.6762	16.3733	17.9519	8.6492	12.2851	15.7263	15.8737
ENSG00000004487	KDM1A	chr1:23345940-23410182	protein_coding	5447	57.6729	49.4411	70.1045	64.7745	67.8482	65.6131	79.814	75.3307	63.1136	59.9524	65.7048	62.3009	36.012	27.11	32.3862	36.2659	10.7498	19.8906	27.8659	26.7836
ENSG00000004534	RBM6	chr3:49977439-50137478	protein_coding	7300	15.6858	14.886	23.1188	22.7592	12.3236	13.2868	18.8739	19.241	16.443	15.755	22.6359	19.8367	13.5307	7.9735	14.2425	13.858	3.109	5.7668	11.3381	10.7528
ENSG00000004660	CAMKK1	chr17:3763608-3798185	protein_coding	7424	1.0152	0.82	1.1872	1.0377	0.7284	0.7244	1.0168	0.8285	1.4573	1.4644	2.2245	1.3436	1.1638	1.3186	2.2409	1.981	3.006	0.4145	1.9707	2.1599
ENSG00000004700	RECQL	chr12:21621844-21654603	protein_coding	3778	17.2773	13.6227	28.5829	27.1622	9.4011	9.3689	16.887	18.1239	10.7634	9.4335	13.5145	16.8272	6.8608	7.1023	15.4965	14.1313	7.2117	7.1694	27.4489	25.9383
ENSG00000004766	CCDC132	chr7:92861652-92988338	protein_coding	7359	2.1797	2.0851	3.5348	3.4066	2.4628	2.4899	3.2889	3.5776	3.6627	3.2657	3.9438	5.032	3.1143	3.4459	3.2887	3.6244	2.5541	3.6236	4.7331	4.1083
ENSG00000004776	HSPB6	chr19:36245468-36248980	protein_coding	1722	0.0281	0	0.0166	0	0.2546	0.0363	0.0936	0.0981	0.0542	0.0475	0	0	0	0.0342	0	0	0.0944	0.1354	0.0341	0.0457
ENSG00000004777	ARHGAP33	chr19:36265433-36279724	protein_coding	5260	2.0943	2.3337	0.7483	1.0984	2.348	2.6513	1.43	1.163	3.3335	2.6885	1.4026	0.9742	2.7423	0.5045	0.4837	0.6287	0.1236	0.1861	0.2285	0.2046
ENSG00000004779	NDUFAB1	chr16:23592322-23607677	protein_coding	1600	29.14	25.4062	37.0436	36.5722	22.7464	21.575	29.1461	30.6917	19.994	17.8811	20.6125	25.9622	14.278	20.5668	17.6993	19.9335	16.8594	20.9497	28.458	28.4583
ENSG00000004799	PDK4	chr7:95212810-95225803	protein_coding	4519	0.0321	0.2004	0.2462	0.3267	0	0	0.0059	0	0.6604	0.3075	0.5406	0.6652	0.8912	0.1566	1.3185	0.5103	1.5463	0.4333	0.1687	0.0987
ENSG00000004809	SLC22A16	chr6:110745889-110797844	protein_coding	3791	0	0	0	0	0	0	0	0	0	0	0	0.009	0	0	0.0088	0	0	0	0	0
ENSG00000004838	ZMYND10	chr3:50378540-50384283	protein_coding	4009	0.0603	0.0502	0.1494	0.0801	0.0729	0.0624	0.1206	0.0674	0.1861	0.2447	0.195	0.2556	0.4018	0.1324	0.3089	0.2062	0.1081	0.0698	0.0878	0.2488
ENSG00000004846	ABCB5	chr7:20654829-20816658	protein_coding	9257	0	0.0109	0.0092	0	0	0.0203	0.0058	0	0.0101	0.0353	0.0528	0.0996	0.0237	0.0319	0.0289	0.0423	0	0.0101	0.0032	0.0028
ENSG00000004848	ARX	chrX:25021810-25034065	protein_coding	2876	0.0168	0.0525	0	0	0.0254	0	0	0	0.0649	0.3126	0.0849	0.2376	3.3606	3.3628	2.9214	2.7686	6.2906	0.6646	0.9175	1.0676
ENSG00000004864	SLC25A13	chr7:95749531-95951459	protein_coding	3710	26.15	21.317	39.7162	35.1267	26.573	25.2336	34.7478	34.07	9.1507	8.5268	7.2828	13.0198	5.5655	6.5172	2.9414	4.0931	1.6644	2.8022	4.6626	4.4282
ENSG00000004866	ST7	chr7:116593291-116870157	protein_coding	6742	1.3616	1.2238	1.3072	1.3188	1.3658	1.4099	1.5141	1.7495	5.5335	6.3289	5.1816	4.6666	4.0183	4.1811	2.835	3.3753	1.4944	1.1686	1.1698	1.4091
ENSG00000004897	CDC27	chr17:45195068-45266788	protein_coding	6824	12.1141	9.8053	17.0115	16.6419	15.4429	15.6799	20.9226	19.865	22.6196	20.2799	24.3079	25.4754	14.9789	15.7543	20.4895	20.391	10.4063	10.5823	26.041	23.6249
ENSG00000004939	SLC4A1	chr17:42325752-42345509	protein_coding	5287	0.0274	0.019	0.0216	0.0121	0	0	0.0051	0	0	0	0	0.0065	0.0138	0	0	0	0	0	0	0.005
ENSG00000004948	CALCR	chr7:93053798-93204042	protein_coding	4036	0.3472	0.2992	0.4806	0.5806	0	0	0.0133	0	0.0231	0.0405	0.0847	0.0085	0	0	0	0.0216	0	0	0	0
ENSG00000004961	HCCS	chrX:11129420-11141198	protein_coding	2335	5.9385	4.8909	7.5979	6.9421	4.5695	3.6424	5.3265	5.1383	5.592	4.761	6.5494	7.2272	5.613	8.0314	8.8021	7.0251	6.7738	7.6668	11.012	10.5201
ENSG00000004975	DVL2	chr17:7128659-7137864	protein_coding	5350	8.5161	8.3974	8.8979	9.1316	14.261	13.8047	14.3603	13.4113	11.0874	10.5883	10.5481	10.1014	8.5812	6.9555	8.4091	7.9296	2.3185	3.8428	5.4967	6.0042
ENSG00000005001	PRSS22	chr16:2902727-2908171	protein_coding	2387	0.3846	0.3161	0.3346	0.1614	0	0	0	0.0142	0	0	0.0819	0	0.1227	0	0	0	0	0	0.0123	0
ENSG00000005007	UPF1	chr19:18942746-18979045	protein_coding	8600	10.0001	10.5123	6.2219	7.155	6.2713	6.6681	5.435	5.3525	7.5047	7.2427	4.8064	4.1628	5.8832	5.0196	5.6945	5.4794	3.0548	2.5695	3.1194	3.2591
ENSG00000005020	SKAP2	chr7:26706680-27034858	protein_coding	5520	0.8753	1.0117	1.638	1.0467	16.933	16.1212	16.1517	15.7228	0.7265	1.081	1.133	0.7983	1.857	2.329	2.08	1.3006	4.1999	5.819	5.3486	4.7068
ENSG00000005022	SLC25A5	chrX:118602362-118605282	protein_coding	1500	100.495	85.8947	209.868	200.616	81.217	75.8773	182.488	180.677	70.5716	58.6365	121.627	157.846	34.4624	38.6469	88.2819	87.2541	16.575	37.8551	78.771	79.7291
ENSG00000005059	CCDC109B	chr4:110481360-110609874	protein_coding	3558	2.8245	2.2624	4.0723	2.9771	1.787	1.617	1.9177	1.9473	1.0747	0.8271	0.8377	2.0258	0.7614	0.3978	0.2446	0.4036	4.2018	3.1316	11.2069	10.7616
ENSG00000005073	HOXA11	chr7:27221128-27224842	protein_coding	2307	0	0	0	0	0	0	0.0116	0	2.8704	2.2677	2.0332	1.8657	1.2695	0.2045	1.1463	1.6974	2.6062	0.6871	4.6768	3.8678
ENSG00000005075	POLR2J	chr7:102113564-102119354	protein_coding	962	15.6697	14.6953	20.2504	20.0199	15.4214	12.3512	19.798	19.2171	14.4456	14.5301	15.5415	17.9681	9.2096	14.4674	10.0561	11.2622	13.5135	9.5953	19.1093	20.1604
ENSG00000005100	DHX33	chr17:5344231-5372380	protein_coding	5872	12.2762	11.335	14.1447	13.1958	8.8239	8.669	10.1101	11.2579	6.3851	5.6936	6.8896	6.2713	3.7782	2.2697	3.4318	3.4234	1.3652	1.5799	3.3004	2.8783
ENSG00000005102	MEOX1	chr17:41717755-41739322	protein_coding	2707	0.0357	0	0.1054	0.0237	0.432	0.3927	0.2282	0.1248	1.0681	1.7816	1.7688	1.5522	3.1106	1.3507	3.2893	3.7934	0.02	0.4994	0.0325	0.0291
ENSG00000005108	THSD7A	chr7:11409983-11871824	protein_coding	10923	0.3052	0.5205	0.7103	0.4584	0.0535	0.0401	0.0516	0.099	0.6831	0.8606	0.6396	1.3135	6.5491	0.5777	0.4045	0.2788	0.0397	0.175	0.0376	0.0505
ENSG00000005156	LIG3	chr17:33307512-33332083	protein_coding	8240	13.5563	11.5455	13.2886	13.2017	9.5519	10.1166	10.869	10.0447	7.9231	7.5889	7.4416	6.173	7.2065	5.8472	7.1945	6.7907	1.7683	2.8175	3.1952	2.8856
ENSG00000005175	RPAP3	chr12:48057069-48099844	protein_coding	3343	12.805	9.9475	17.4906	16.5245	12.5481	12.2528	15.4362	15.1342	10.6574	8.1424	10.2308	13.4783	7.9726	8.0089	9.9731	9.9048	4.6341	6.4288	10.0508	9.1928
ENSG00000005187	ACSM3	chr16:20621564-20808903	protein_coding	5095	0.3793	0.3555	0.6326	0.7875	0.7746	0.7364	1.2812	1.8308	0.1647	0.1765	0.1343	0.0738	0.5461	0.1389	0.4665	0.5551	0.0425	0.0824	0.023	0.0721
ENSG00000005189	AC004381.6	chr16:20817750-20860987	protein_coding	4111	2.2212	1.6031	2.4561	2.2643	2.0266	2.3579	3.6527	3.5104	1.6108	1.4515	1.8541	1.4376	1.3892	0.459	1.3924	1.0902	0.5534	0.4423	0.813	0.9129
ENSG00000005194	CIAPIN1	chr16:57462080-57481440	protein_coding	3509	12.929	10.8103	21.1826	19.3195	9.5803	8.9821	16.084	16.6817	11.6151	11.2981	14.829	20.3368	9.1812	13.529	12.1533	12.9206	6.2672	7.4267	13.352	13.9858
ENSG00000005206	SPPL2B	chr19:2328613-2355099	processed_transcript	7096	4.9023	5.1826	2.259	2.515	4.5006	4.5651	2.8884	2.8291	7.6627	7.1421	4.627	3.0858	5.9125	4.0058	3.9201	5.0526	1.7175	1.3928	1.9378	2.2745
ENSG00000005238	FAM214B	chr9:35104108-35116338	protein_coding	6409	0.9272	1.044	1.2951	1.3072	1.3113	1.6588	1.7311	1.6558	2.1392	1.8366	2.0126	1.9828	1.9308	1.6471	1.9116	1.6633	6.5754	2.3786	7.0725	7.2479
ENSG00000005243	COPZ2	chr17:46103532-46115392	protein_coding	1847	0.0523	0.0545	0.139	0.2085	0.277	0.3047	0.5236	0.2562	0.8584	0.8851	0.7142	0.9433	1.5461	0.2554	0.9243	1.013	8.1822	2.726	10.9054	11.8361
ENSG00000005249	PRKAR2B	chr7:106685093-106802256	protein_coding	4318	10.3276	8.2373	16.2099	14.897	3.9434	3.36	5.5057	6.3868	1.7496	1.4766	1.4484	2.5316	1.4753	0.2185	0.1395	0.2418	0.2007	0.9501	0.4006	0.626
ENSG00000005302	MSL3	chrX:11776277-11793870	protein_coding	6494	2.0311	1.6191	2.8593	2.506	2.5883	2.3497	2.7467	2.8936	3.849	3.3482	3.3782	3.6507	2.2212	2.5155	2.5258	2.9146	2.5357	2.3188	3.2958	3.4634
ENSG00000005339	CREBBP	chr16:3775054-3930727	protein_coding	15068	7.5063	6.3705	3.1744	3.6235	5.1508	5.138	2.528	2.5188	9.4083	10.2097	4.8088	4.5093	6.9829	5.1271	3.7011	3.7626	2.3223	1.9647	1.3835	1.5031
ENSG00000005379	BZRAP1	chr17:56378591-56406152	protein_coding	11382	1.7956	1.41	1.2956	1.4185	2.6389	2.6318	2.5725	2.3784	2.8352	2.6572	2.494	2.1399	1.7369	0.2694	0.8382	0.7454	0.1095	0.0901	0.2937	0.2559
ENSG00000005381	MPO	chr17:56347216-56358296	protein_coding	3622	0	0	0	0.0089	0	0	0	0	0	0	0	0	0.0202	0	0.0092	0.024	0	0	0	0
ENSG00000005421	PON1	chr7:94926987-95025673	protein_coding	2988	0.097	0.1179	0.1527	0.2793	0	0.0209	0	0	0.0312	0	0.0164	0	0.049	0	0	0	0	0	0	0
ENSG00000005436	GCFC2	chr2:75879125-75938115	protein_coding	5465	4.4469	3.2128	5.0104	4.5578	4.9612	5.424	7.1224	8.4847	6.3486	5.7885	6.446	4.9069	3.7917	2.9999	4.0487	3.9809	0.9416	1.5184	2.6556	2.4347
ENSG00000005448	WDR54	chr2:74648804-74652882	protein_coding	2860	5.5241	7.5288	12.127	10.8417	7.7936	11.086	17.8741	13.2587	5.9677	5.1732	8.8323	5.8169	4.6339	0.8248	1.7439	1.9626	1.3258	1.0921	3.7418	3.9366
ENSG00000005469	CROT	chr7:86974996-87029111	protein_coding	4979	1.5138	0.9902	1.6441	1.8825	1.1742	1.0425	1.2355	1.473	2.0418	2.0193	2.4336	2.9022	1.4706	1.1252	1.8892	2.1148	1.4252	1.6105	2.5969	2.4773
ENSG00000005471	ABCB4	chr7:87031012-87109751	protein_coding	7494	0.1289	0.1745	0.1522	0.2184	0.7704	0.7177	1.165	1.2673	0.0124	0.0218	0.0326	0.0091	0.1856	0	0.0268	0.0174	0.2674	0.0062	0.0469	0.0595
ENSG00000005483	KMT2E	chr7:104654625-104754808	protein_coding	9227	9.4986	9.8198	5.3818	7.4759	11.6825	13.2297	7.9625	8.3549	12.8068	15.1224	8.2765	5.7496	12.8792	7.1711	7.8506	7.9081	2.583	3.6227	3.1744	3.3704
ENSG00000005486	RHBDD2	chr7:75471919-75518244	protein_coding	2441	3.6221	3.8953	3.7274	4.0238	9.8199	7.9675	8.3857	8.1827	6.1897	5.6593	5.2442	7.5291	7.1991	5.1943	4.6213	5.0267	6.2577	4.2017	7.579	7.7732
ENSG00000005513	SOX8	chr16:1031807-1036979	protein_coding	4432	1.6897	1.3735	0.6822	0.7677	1.9622	2.3705	1.5274	1.3345	22.8536	27.4811	15.0701	10.4132	19.6103	28.0627	19.3351	27.7344	0.8066	2.1038	3.6847	3.6772
ENSG00000005700	IBTK	chr6:82879699-82957471	protein_coding	8722	7.4949	6.7256	11.2036	12.2771	4.6587	4.5888	7.8137	8.269	9.795	9.7656	13.999	12.3687	10.7287	10.6762	14.9332	15.8589	6.347	10.3213	21.1978	19.1128
ENSG00000005801	ZNF195	chr11:3360490-3400448	protein_coding	5705	13.5672	10.8555	16.1436	16.3897	11.0165	10.0518	11.8799	12.2213	11.3293	10.4309	10.6625	10.3231	6.1349	6.626	6.8239	7.0014	2.1078	3.7263	3.7568	4.1677
ENSG00000005810	MYCBP2	chr13:77618791-77901185	protein_coding	15943	7.3004	7.4913	7.6517	8.5828	10.0983	9.7905	9.4457	9.0751	10.0035	10.603	9.4084	9.4299	8.9097	7.4793	6.6053	6.8256	6.1699	8.4859	7.4792	7.4931
ENSG00000005812	FBXL3	chr13:77566739-77601330	protein_coding	4651	3.6462	3.2342	6.8991	6.4942	4.2425	4.5312	5.8912	6.3728	7.1188	5.9756	9.9588	9.6658	5.8879	5.0845	6.9668	6.4551	4.3674	4.3803	11.0759	10.7944
ENSG00000005844	ITGAL	chr16:30483978-30534506	protein_coding	6472	0.0373	0.0389	0.0088	0.0397	0.0452	0.029	0.0332	0.0313	0	0.0126	0.0075	0	0.0453	0.0091	0.0155	0.0672	0	0	0	0
ENSG00000005882	PDK2	chr17:48172100-48189516	protein_coding	5481	2.2214	1.9	2.1388	1.9267	2.1334	1.7913	1.7742	1.7944	4.1179	4.1759	3.7262	3.4155	4.4619	3.7658	4.1652	3.485	5.2378	3.6659	2.9581	3.0309
ENSG00000005884	ITGA3	chr17:48133331-48167845	protein_coding	9802	5.2347	2.8742	1.6412	2.7835	0.0447	0.0574	0.0466	0.0724	1.5414	1.9014	2.0088	1.5265	1.8675	2.184	2.0422	1.7712	17.9156	6.6633	9.9426	9.9118
ENSG00000005889	ZFX	chrX:24167289-24234372	protein_coding	9037	6.5439	6.1015	10.5795	9.7322	6.6716	6.401	8.8908	9.1027	12.6529	12.971	16.3982	19.2332	10.063	12.177	14.9386	15.3013	6.5453	7.2635	12.2734	12.4497
ENSG00000005893	LAMP2	chrX:119561681-119603220	protein_coding	5617	6.52	7.1832	10.2726	11.7376	6.7135	5.9118	10.0383	10.2949	10.6932	10.8272	15.6746	16.4935	11.8753	11.7169	20.6612	17.6848	18.3899	16.3256	34.2362	32.0095
ENSG00000005955	GGNBP2	chr17:34900736-34946278	protein_coding	9729	3.7395	3.144	5.1569	4.8103	6.2196	6.0614	8.8659	8.1114	6.6338	5.6545	8.3667	7.2577	5.5316	4.5583	9.2691	8.7478	2.9619	3.7089	7.3682	6.8193
ENSG00000005961	ITGA2B	chr17:42449547-42466873	protein_coding	5551	1.7147	2.157	1.8549	2.2378	2.0011	2.0616	2.8213	2.5997	0.5545	0.3387	0.713	0.2954	1.1212	0.0956	0.8261	0.7525	0	0.0588	0.0211	0.0378
ENSG00000005981	ASB4	chr7:95107755-95169544	protein_coding	4605	0	0	0.0062	0	0	0	0	0.0367	0.162	0.1953	0.6154	1.0682	8.5066	9.1309	23.4281	21.9965	3.9875	16.2991	2.4703	2.576
ENSG00000006007	GDE1	chr16:19513014-19533467	protein_coding	4412	8.7168	8.8942	12.283	13.2119	7.2385	7.1296	9.1755	9.085	9.1956	11.3016	13.1672	14.804	8.0987	8.7684	9.4003	8.9251	16.6355	14.8566	17.4972	16.34
ENSG00000006015	C19orf60	chr19:18699494-18703146	protein_coding	3370	5.4193	6.6432	2.1074	2.2383	4.5757	4.8619	2.0087	2.4069	4.5111	4.5601	1.5803	2.4531	3.2156	3.0274	0.8344	1.2653	3.1182	2.5592	1.6095	1.8223
ENSG00000006016	CRLF1	chr19:18683029-18718551	protein_coding	3018	1.0086	0.7168	0.5481	0.6488	0.1211	0.0829	0.0979	0.1568	0	0.0271	0	0.0226	0.4367	0.0391	0.0222	0.0288	0.1436	0.0618	0.1652	0.1826
ENSG00000006025	OSBPL7	chr17:45884737-45899200	protein_coding	6572	1.0366	1.3779	1.2326	1.2845	1.1231	1.3322	1.541	1.5582	1.4901	2.2886	1.933	1.4814	2.5402	1.4716	2.7352	3.1779	2.6127	1.1563	1.6997	1.6572
ENSG00000006042	TMEM98	chr17:31254927-31272124	protein_coding	5187	7.8336	6.2365	11.9435	10.5634	12.0181	10.6337	16.6863	15.9634	10.8604	8.3366	11.0962	14.3242	6.8887	4.7297	7.6925	6.1571	2.8196	3.4783	7.2012	7.2706
ENSG00000006047	YBX2	chr17:7191570-7197934	protein_coding	4618	4.5511	5.763	4.9164	4.8308	0.8229	0.8667	0.5991	0.5562	0.3029	0.354	0.2751	0.1775	0.8403	0.1149	0.6379	0.3863	0	0.0404	0.0254	0.0284
ENSG00000006059	KRT33A	chr17:39502343-39507064	protein_coding	1287	0	0	0	0	0	0	0	0	0	0	0	0	0	0	0	0	0	0	0	0
ENSG00000006062	MAP3K14	chr17:43340487-43394414	processed_transcript	5132	1.7134	0.696	1.156	0.7756	0.7832	0.5483	0.5862	0.6915	1.7628	1.4494	1.5138	1.5443	1.5551	1.1951	2.1655	2.0433	1.9632	0.8267	2.2624	2.0506
ENSG00000006071	ABCC8	chr11:17414431-17498449	protein_coding	6835	0.3393	0.3975	0.2212	0.3381	0.1604	0.1738	0.1493	0.0643	0.1774	0.4066	0.193	0.055	0.3535	0.1553	0.1028	0.0573	0.0158	0.0205	0	0.0038
ENSG00000006074	CCL18	chr17:34391639-34399392	protein_coding	1397	0	0.036	0	0	0.0523	0	0.0192	0.0484	0	0	0	0.0245	0.0524	0	0	0	0	0.0334	0	0
ENSG00000006075	CCL3	chr17:34415601-34417515	protein_coding	1494	0	0	0	0	0	0	0	0	0	0	0.0327	0	0.049	0	0	0	0.0363	0	0.0196	0
ENSG00000006114	SYNRG	chr17:35874899-35969544	protein_coding	14277	3.3604	2.8155	4.1075	4.0446	2.8153	2.8077	3.5881	3.3236	3.6844	3.5555	4.1033	3.9384	3.1387	2.5445	3.9366	3.645	1.4341	1.9625	3.257	3.0073
ENSG00000006116	CACNG3	chr16:24266873-24374122	protein_coding	3088	0	0	0	0	0	0	0	0	0	0.0265	0	0	0.0237	0.0191	0	0	0	0	0	0
ENSG00000006118	TMEM132A	chr11:60691934-60704631	protein_coding	7271	8.5719	9.3478	5.9744	6.3791	12.3125	12.1873	9.7498	10.6815	13.9688	15.1545	10.429	10.3455	13.2121	9.8383	6.1138	8.1205	9.9603	8.4635	8.1212	9.1318
ENSG00000006125	AP2B1	chr17:33905064-34053436	protein_coding	7797	28.7027	29.6423	31.8697	34.1157	27.772	32.2105	34.2425	32.0065	17.2609	19.5628	19.7204	19.9436	15.5888	9.8477	11.2524	11.546	10.6847	11.767	22.9342	20.3906
ENSG00000006128	TAC1	chr7:97361219-97369784	protein_coding	1888	0.128	0.0266	0.4381	0.119	0.7742	0.2319	0.2561	0.179	0.0988	0	0.1035	0.1809	1.241	0.0312	0.0886	0.1383	0	0	0	0
ENSG00000006194	ZNF263	chr16:3313742-3351401	protein_coding	9329	2.9624	2.6532	4.0663	3.9431	3.3058	3.1975	4.2876	4.2314	4.129	3.6889	4.6036	4.969	3.4613	3.4705	7.1117	4.9999	1.5212	1.7391	3.3565	3.0495
ENSG00000006210	CX3CL1	chr16:57406369-57418960	protein_coding	5983	0.6218	0.2439	0.2098	0.3058	0.0977	0.1463	0.0898	0.1299	0.2806	0.2186	0.2205	0.2284	0.6731	0.0394	0.0671	0.0364	0.0181	0.2805	0.0686	0.0526
ENSG00000006282	SPATA20	chr17:48620418-48633213	protein_coding	5237	3.7549	3.9002	4.1283	4.8972	2.8747	3.3077	4.3754	4.2657	7.8538	9.8803	9.2083	6.6078	9.3256	6.3849	13.5123	13.9664	7.023	3.9703	9.495	9.8722
ENSG00000006283	CACNA1G	chr17:48638428-48704835	protein_coding	9709	0.9206	1.3835	0.6551	0.7703	1.1742	1.8872	1.6601	1.9842	2.3055	4.277	2.325	1.5798	3.8462	0.2308	0.0758	0.2958	0	0.024	0.0302	0.0243
ENSG00000006327	TNFRSF12A	chr16:3068445-3072384	protein_coding	1848	16.0004	9.4738	18.0889	14.4339	0.3955	0.7445	0.9739	0.8047	2.473	3.804	4.6797	16.0452	6.5375	17.6153	13.7844	10.8071	28.1679	8.2492	46.549	46.0689
ENSG00000006377	DLX6	chr7:96634859-96640351	protein_coding	3449	0.2522	0.175	0.3556	0.0931	0	0	0	0.0098	0	0	0	0.0297	0.0425	0.0171	0.0291	0	0	0	0	0.038
ENSG00000006432	MAP3K9	chr14:71189242-71276251	protein_coding	12386	4.7316	3.9399	3.5302	3.1487	2.9973	3.2869	2.1862	1.7654	0.9262	0.8843	0.4576	0.331	1.0345	0.538	0.7216	0.5586	1.5437	0.4705	0.587	0.5657
ENSG00000006451	RALA	chr7:39663081-39747723	protein_coding	3665	13.9474	10.7482	25.7208	24.6103	11.5454	9.7089	19.6358	19.9737	9.3903	7.7393	13.9579	15.892	5.1944	5.1491	10.0193	10.4118	8.0696	7.7339	19.5915	18.6679
ENSG00000006453	BAIAP2L1	chr7:97920962-98030380	protein_coding	4798	10.966	10.6323	10.4923	11.0652	10.068	10.779	12.2556	12.0944	2.0799	1.9933	1.8432	1.2317	3.4489	2.3845	7.2697	5.9943	2.4724	0.515	3.5503	3.5991
ENSG00000006459	KDM7A	chr7:139784545-139876835	protein_coding	9430	3.6992	2.5555	3.8504	3.7953	5.0374	5.6634	7.6714	9.5226	2.6111	2.9472	3.544	2.0794	4.3094	2.9955	7.5645	6.1321	1.4188	1.9182	1.6914	1.7644
ENSG00000006468	ETV1	chr7:13930852-14031050	protein_coding	9686	7.2527	4.2591	7.0143	6.1506	1.2977	1.1428	1.5697	1.1933	0.6548	0.7427	0.8222	1.3155	2.7365	1.1933	1.1543	1.743	0.9339	2.575	3.2873	3.2432
ENSG00000006530	AGK	chr7:141250988-141355044	protein_coding	6547	4.6714	4.8027	6.1036	7.2071	4.9003	4.9001	6.1751	5.7971	4.8578	4.8069	5.5076	6.3709	3.2657	3.4229	2.9246	3.2033	2.0767	2.2074	4.9261	4.3252
ENSG00000006534	ALDH3B1	chr11:67776047-67796744	protein_coding	6621	0.0219	0.038	0.0388	0.0582	0.1876	0.3022	0.2678	0.2399	0.0282	0.037	0.0074	0.0155	0.0664	0.0089	0.0354	0.0131	0.54	0.4788	0.4782	0.4915
ENSG00000006555	TTC22	chr1:55245384-55266940	protein_coding	6055	0.1516	0.216	0.1366	0.159	0	0.0413	0	0	0	0	0	0.0113	0.0605	0.0097	0	0	0	0	0	0
ENSG00000006576	PHTF2	chr7:77428121-77586818	protein_coding	8631	4.0248	3.8063	5.2577	5.6938	4.8687	4.1662	5.2972	4.9456	5.1653	4.9437	5.4628	4.6664	3.0455	1.961	3.0096	2.8231	4.6818	3.3543	6.7702	6.2486
ENSG00000006606	CCL26	chr7:75398850-75419214	protein_coding	706	1.3003	2.2803	6.262	4.7739	0.4141	0.2657	0.1141	0.383	0.1321	0	0.2768	0.629	0.1037	0	0	0	0.3069	0.1981	0.9552	1.301
ENSG00000006607	FARP2	chr2:242295657-242434256	protein_coding	14413	3.0103	2.1083	2.4242	2.3228	2.3933	2.3473	2.2831	2.3871	4.3485	4.5655	3.9662	4.1667	3.2411	3.5311	3.6463	3.9396	1.8979	1.8987	3.1469	2.9097
ENSG00000006611	USH1C	chr11:17515441-17565963	protein_coding	4187	0.2654	0.3485	0.1907	0.4063	0.1396	0.1643	0.1796	0.1695	0.8465	0.6443	0.6418	0.1877	1.2941	0.0704	0.1599	0.2598	0.0129	0.0111	0.028	0.0251
ENSG00000006625	GGCT	chr7:30536236-30591095	protein_coding	1905	18.2608	16.1888	36.6825	31.6773	22.5955	21.108	38.5668	38.8707	11.1136	9.2255	14.7219	18.0398	5.8807	6.1914	8.4695	8.725	4.6063	6.6075	11.466	11.6548
ENSG00000006634	DBF4	chr7:87505530-87538856	protein_coding	4583	13.6416	10.8676	18.3719	19.4426	11.7522	11.5166	14.5128	15.0142	12.3731	9.3639	12.3667	11.7248	4.2498	2.5349	3.3014	3.997	0.3546	0.9053	3.0132	2.6742
ENSG00000006638	TBXA2R	chr19:3594503-3606838	protein_coding	2793	0.1211	0.0721	0.0511	0.0575	0.1308	0.3582	0.202	0.1331	0.0334	0.0293	0.0175	0.0122	0.1049	0.0211	0	0	0.0776	0.0501	0.063	0.1034
ENSG00000006652	IFRD1	chr7:112063022-112121072	protein_coding	6481	6.1652	5.2708	7.4376	7.7262	11.4791	10.1992	11.8874	12.1712	7.0515	7.4162	8.5717	11.09	8.575	8.4169	19.5803	14.676	3.3515	3.0715	6.9984	6.8596
ENSG00000006659	LGALS14	chr19:40194945-40200084	protein_coding	1079	0	0	0	0	0	0	0	0	0	0	0	0	0	0	0	0	0	0	0	0
ENSG00000006695	COX10	chr17:13972812-14111994	protein_coding	3172	5.3311	4.9485	5.1794	5.1204	6.4049	6.1708	6.631	5.9666	5.3513	4.5097	4.3745	5.4817	3.9934	4.3876	3.3875	3.4705	1.793	3.3804	2.5141	2.6062
ENSG00000006704	GTF2IRD1	chr7:73868119-74016931	protein_coding	6498	6.5431	6.1241	5.2454	6.1105	5.061	4.5136	4.5846	4.2649	11.626	8.5793	8.4816	8.3168	8.9244	9.0211	12.2398	10.8744	4.7598	2.6043	4.0563	3.8853
ENSG00000006712	PAF1	chr19:39876491-39881835	protein_coding	2668	9.4892	8.3346	11.2037	9.9496	11.9153	11.0868	12.495	12.7434	13.8781	12.7454	12.3796	17.5029	10.1817	10.4993	7.7286	7.5019	8.0804	10.3793	14.9343	14.8335
ENSG00000006715	VPS41	chr7:38762562-38971994	protein_coding	7801	6.7261	6.6297	11.1077	10.8668	7.0542	6.806	9.1425	9.098	8.644	8.9172	10.2529	9.6689	7.0489	5.201	5.5611	6.5872	4.9438	5.8865	11.1587	10.6914
ENSG00000006740	ARHGAP44	chr17:12692855-12894960	protein_coding	9281	1.8012	1.9406	1.8685	1.8745	1.0709	0.9366	1.1317	1.0233	0.2713	0.2995	0.3527	0.3202	0.3471	0.0318	0.0577	0.075	0.0817	0.0553	0.0885	0.1442
ENSG00000006744	ELAC2	chr17:12895707-12921504	protein_coding	6345	15.1684	12.8132	14.4793	15.6015	10.965	11.4822	13.5563	13.9129	10.9656	11.0922	9.8104	12.9859	6.3238	7.1381	6.8161	7.2621	4.8746	5.6281	8.1927	8.1565
ENSG00000006747	SCIN	chr7:12610202-12693228	protein_coding	5048	0.0383	0	0.0509	0.0509	0	0	0.0053	0.0067	0.037	0	0.1161	0.1218	0.2611	0.0117	0.0199	0.0259	3.5732	0.2586	0.0523	0.0312
ENSG00000006756	ARSD	chrX:2822010-2847392	protein_coding	7030	1.1821	1.4742	1.343	1.7716	2.2454	2.2773	2.3806	2.846	2.0033	2.0581	1.3066	2.4685	2.4789	2.1559	1.038	1.176	2.6891	2.7057	3.8411	4.6851
ENSG00000006757	PNPLA4	chrX:7866287-7895780	protein_coding	3441	0	0	0	0	0	0	0	0	0	0	0	0.0596	0.0213	0	0.0292	0	0	0	0	0
ENSG00000006788	MYH13	chr17:10201400-10276447	protein_coding	6347	0	0	0	0	0	0	0	0	0.7494	1.9705	3.3871	1.9537	0.1269	0.0557	0.1846	0.5073	0.0171	0.0514	0.0231	0.0207
ENSG00000006831	ADIPOR2	chr12:1797739-1897844	protein_coding	5878	7.9073	7.1724	13.5043	11.8171	9.5112	11.2029	17.7044	17.3411	8.5523	8.2883	10.2656	12.1754	5.3813	5.0666	6.1561	6.2402	4.5431	5.3298	9.956	10.1038
ENSG00000006837	CDKL3	chr5:133541304-133706738	protein_coding	3681	0.1969	0.1367	0.3874	0.2878	0.2184	0.1359	0.4743	0.3948	0.4054	0.4441	0.438	0.3434	0.2586	0.1442	0.6547	0.5319	0.1619	0.1266	0.2708	0.2781
ENSG00000007001	UPP2	chr2:158733213-158992666	protein_coding	2957	0	0	0	0	0	0	0	0	0.0631	0.0553	0.0165	0.0116	0.0248	0	0	0.0589	0	0	0	0
ENSG00000007038	PRSS21	chr16:2867163-2876305	protein_coding	1984	0.0244	0.0254	0.0144	0.0324	0	0	0	0	0	0	0	0.0172	0.0738	0	0	0.0219	0	0.0235	0	0
ENSG00000007047	MARK4	chr19:45582545-45808541	protein_coding	6668	4.2315	4.7759	2.5323	2.5802	5.5348	5.3458	4.2099	4.1916	5.6788	4.7932	3.29	2.5513	7.2144	6.014	7.6004	6.3165	3.1356	2.3072	2.5678	2.9597
ENSG00000007062	PROM1	chr4:15964698-16086001	protein_coding	7465	10.2196	9.5429	13.2201	15.2903	1.0377	1.0555	0.9896	1.0368	2.7861	2.7375	2.4675	2.9287	2.1677	0.2923	0.3318	0.4663	0.0363	0.8868	0.1571	0.1652
ENSG00000007080	CCDC124	chr19:18043824-18054800	protein_coding	1660	14.1743	14.123	8.6427	8.6047	10.786	11.2641	7.9132	7.8588	11.5178	9.5038	7.4172	10.701	8.8217	8.1354	6.4125	7.6013	7.7335	6.6278	8.1599	7.5412
ENSG00000007129	CEACAM21	chr19:42055885-42093197	protein_coding	1926	0	0	0	0	0	0	0	0	0	0	0	0	0	0	0	0	0	0	0	0
ENSG00000007168	PAFAH1B1	chr17:2496503-2588909	protein_coding	8127	16.3666	14.6836	27.231	24.8747	12.5623	12.6273	19.3893	18.776	21.0357	19.5832	27.7573	28.5493	18.1272	13.3445	20.0876	19.6862	13.3567	13.5723	27.9916	26.9899
ENSG00000007171	NOS2	chr17:26083791-26127525	protein_coding	4176	0.4396	0.2891	0.321	0.3228	0.21	0.2845	0.2316	0.2104	0.0223	0	0.0936	0.0818	0.1052	0	0.0481	0.0313	0	0	0.0211	0.0189
ENSG00000007174	DNAH9	chr17:11501747-11873065	protein_coding	16980	0.037	0.0296	0.0353	0.0227	0.1377	0.1068	0.0744	0.0378	0.1483	0.0963	0.0978	0.0382	0.1768	0.0243	0.0473	0.0461	0	0.0027	0.0017	0
ENSG00000007202	KIAA0100	chr17:26941457-26972472	protein_coding	9235	28.7065	23.376	24.0565	24.5492	23.8274	24.1884	23.9481	25.2954	25.7732	27.1117	24.3423	27.754	19.3695	18.2825	16.6844	16.2548	19.4555	21.0861	25.5698	25.1953
ENSG00000007216	SLC13A2	chr17:26800310-26824799	protein_coding	3226	0	0	0	0.0099	0	0	0	0	0	0	0	0	0	0.0183	0	0	0	0.0145	0	0
ENSG00000007237	GAS7	chr17:9813925-10101868	protein_coding	10100	1.8608	1.843	1.7594	1.8051	0.3907	0.3529	0.4708	0.6793	0.8865	1.0764	1.0256	0.8692	1.8269	0.1518	0.1458	0.1034	0.0161	0.2816	0.4964	0.5613
ENSG00000007255	TRAPPC6A	chr19:45666185-45681495	protein_coding	933	13.8265	13.9119	18.0367	21.3302	10.1044	11.5287	23.1774	23.1832	11.2959	12.3533	16.2341	9.1535	9.8883	7.2689	8.4671	12.9181	3.7737	4.597	7.6048	5.035
ENSG00000007264	MATK	chr19:3777970-3802127	protein_coding	4138	1.7747	2.3951	0.9995	1.3497	0.0706	0.0302	0.0714	0.1388	0.3155	0.5729	0.2598	0.4871	0.0531	0.0855	0.0324	0.1051	0.0262	0	0	0
ENSG00000007306	CEACAM7	chr19:42177234-42210895	protein_coding	2649	0	0	0	0	0	0	0	0	0	0	0	0.0258	0	0	0	0.0164	0	0	0	0
ENSG00000007312	CD79B	chr17:62006099-62009714	protein_coding	2080	0.302	0.2661	0.384	0.5093	0.1757	0.5412	1.1752	0.7962	0	0	0	0.0328	0.1056	0	0	0.0209	0.026	0	0.0282	0
ENSG00000007314	SCN4A	chr17:62015913-62050278	protein_coding	8247	1.2713	1.3543	1.041	1.0898	1.471	1.4028	0.9186	0.8032	0.1583	0.1189	0.154	0.1036	0.2752	0.0787	0.1705	0.1741	3.3103	0.6897	0.3804	0.5219
ENSG00000007341	ST7L	chr1:113066139-113163447	protein_coding	8111	1.4773	1.2405	1.8849	1.674	1.82	1.6885	2.1726	2.3917	2.2308	1.9854	2.3854	2.0806	1.8777	1.8031	2.567	2.4784	0.8548	0.9541	1.3122	1.5143
ENSG00000007350	TKTL1	chrX:153524023-153558700	protein_coding	3650	0.0132	0.0138	0.0078	0	0.0801	0.0514	0.1987	0.213	0.1278	0.0224	0.0268	0.131	0.1204	0.0162	0.055	0	0	0.0128	0.008	0
ENSG00000007372	PAX6	chr11:31806339-31839509	protein_coding	14776	0.1243	0.0919	0.112	0.126	0	0	0.0218	0.0046	0.0821	0.1106	0.0661	0.1248	0.5352	0.012	0.0317	0.0324	0.0257	0.0158	0.004	0.0124
ENSG00000007376	RPUSD1	chr16:834973-838397	protein_coding	2769	5.3044	6.2137	4.0894	3.8834	5.7272	5.8494	4.4141	4.5038	4.2777	4.5462	2.4703	4.4783	2.988	3.3224	1.9463	1.8856	3.4429	3.1484	3.2718	3.9238
ENSG00000007384	RHBDF1	chr16:108057-126354	protein_coding	5104	3.7202	3.4203	2.4085	2.5659	3.1214	3.3939	2.7105	2.695	1.6263	2.4824	2.0869	1.198	7.2302	6.3317	6.1977	5.7714	6.6753	4.3843	6.158	6.7512
ENSG00000007392	LUC7L	chr16:238967-279462	protein_coding	6176	11.6407	8.9035	14.5938	11.9382	10.5787	13.052	15.3582	14.3538	15.0259	14.6649	18.3618	12.8601	11.7015	7.4003	14.7261	17.1902	3.21	4.9292	8.0799	7.9505
ENSG00000007402	CACNA2D2	chr3:50400232-50541675	protein_coding	6319	6.9043	8.6622	5.5564	8.9148	0.7633	0.8115	0.931	0.9413	1.2693	1.4359	1.4304	1.292	2.2479	0.1213	0.1801	0.303	0.3172	0.0148	0.0603	0.1204
ENSG00000007516	BAIAP3	chr16:1383601-1399439	protein_coding	6143	0.464	0.5978	0.3297	0.324	0.1784	0.2341	0.1531	0.1155	0.4099	0.2395	0.175	0.139	1.4542	0.0672	0.2125	0.2267	0.0529	0.0455	0.0286	0.0299
ENSG00000007520	TSR3	chr16:1399240-1401912	protein_coding	1243	14.0708	14.2469	10.6701	11.2848	15.9331	15.2442	12.232	13.4589	14.5565	17.427	10.3379	13.4115	13.6073	15.3718	8.3214	10.1514	17.5617	18.0777	16.0866	15.6239
ENSG00000007541	PIGQ	chr16:616994-634136	protein_coding	6869	3.1933	2.9882	1.6319	1.9813	3.7876	3.7327	2.3269	2.5044	4.44	4.4864	2.2548	2.7203	3.5283	2.8332	1.3206	2.0207	2.2238	1.5406	1.5494	1.9753
ENSG00000007545	CRAMP1L	chr16:1662325-1727909	protein_coding	8427	2.4539	2.0298	1.672	1.8169	1.8992	1.9517	1.3101	1.2994	2.8001	3.1913	2.4409	1.6499	2.3112	1.6446	1.8193	1.7607	0.5464	1.2392	0.8176	0.8595
ENSG00000007866	TEAD3	chr6:35441373-35464853	protein_coding	3046	7.3123	7.8123	6.2926	7.0288	4.8704	4.9479	5.6442	4.6046	16.565	18.8657	18.222	12.8187	14.9037	10.9582	15.0776	14.2846	3.521	3.5814	5.8138	5.1781
ENSG00000007908	SELE	chr1:169691780-169733846	protein_coding	4586	0.0105	0.011	0	0.014	0	0	0	0	0	0	0	0.0149	0	0	0	0	0	0	0	0
ENSG00000007923	DNAJC11	chr1:6694227-6761984	protein_coding	5147	14.1087	12.2474	17.2731	16.1272	9.7687	10.2182	11.2942	11.7602	9.8394	9.3383	8.3536	12.0927	6.6292	8.2037	6.0743	6.3656	5.5146	6.7298	8.8066	8.7089
ENSG00000007933	FMO3	chr1:171060017-171086959	protein_coding	3463	0	0	0.0082	0	0	0	0	0	0	0.1652	0.1411	0.0197	0.5286	0.2895	0.6766	0.7539	0.0156	0.0673	0.1609	0.1743
ENSG00000007944	MYLIP	chr6:16129355-16148479	protein_coding	3033	3.9506	6.1041	6.0938	7.3976	2.2168	2.4124	2.5951	2.6743	6.1194	6.8725	9.1823	8.7964	10.9843	8.3414	22.7684	18.9366	4.7148	5.6718	5.713	5.5378
ENSG00000007952	NOX1	chrX:100098312-100129334	protein_coding	2529	0	0	0	0.0127	0	0	0	0	0	0	0	0.0135	0	0	0	0.0516	0	0	0.0116	0.0208
ENSG00000007968	E2F2	chr1:23832921-23857712	protein_coding	5457	3.0545	2.102	2.2789	1.6058	1.3258	1.4783	0.7827	0.7618	5.3666	4.9731	4.1007	7.537	1.6638	0.9402	0.5643	1.0605	0.0397	0.0683	0.3976	0.3847
ENSG00000008018	PSMB1	chr6:170844204-170862429	protein_coding	2256	51.6987	38.6463	99.8666	87.6164	33.9812	31.185	64.8112	58.3803	35.5123	31.9215	44.6361	60.8868	21.6805	34.4793	28.162	32.4211	24.7544	19.9208	67.4888	65.0049
ENSG00000008056	SYN1	chrX:47431302-47479252	protein_coding	3203	1.433	0.7539	0.3295	0.3407	0.1597	0.1367	0.0755	0.0211	0.2912	0.2042	0.0915	0.1386	0.8687	0.313	0.0836	0.0679	0.2537	0.0437	0.0458	0.041
ENSG00000008083	JARID2	chr6:15246526-15522252	protein_coding	6490	45.2851	50.9372	47.4686	58.4005	11.1366	11.7557	14.5034	14.9039	10.3039	10.5421	11.8196	8.7376	8.0779	4.0799	5.3641	6.9591	2.7793	3.017	4.7706	4.5897
ENSG00000008086	CDKL5	chrX:18443702-18671749	protein_coding	3576	5.0396	6.5982	4.9531	5.6101	1.7984	1.8887	1.6376	1.7201	3.3123	3.4516	3.1152	1.6908	3.5832	1.5502	2.8082	2.8715	0.6816	1.6035	1.5742	1.5192
ENSG00000008118	CAMK1G	chr1:209757061-209787283	protein_coding	2676	0.2528	0.3196	0.3091	0.2519	0.4643	0.5375	0.4618	0.682	0.2091	0.0916	0.0548	0	0.4378	0.0441	0.025	0.0163	0.1012	0.2962	1.0189	1.0494
ENSG00000008128	CDK11A	chr1:1634168-1655766	protein_coding	4707	1.4165	1.1329	1.3028	1.357	1.4905	1.2622	1.4496	1.436	1.922	1.7192	1.6193	1.7128	1.8511	0.8895	2.3966	1.7194	0.4373	0.6042	0.897	1.0482
ENSG00000008130	NADK	chr1:1682670-1711896	protein_coding	5637	8.9739	8.5232	9.8465	9.7315	9.3214	9.8403	11.3894	11.4874	8.4878	9.2517	9.725	9.8355	5.9621	5.2936	6.5499	5.6656	3.2767	3.0352	5.4977	5.6473
ENSG00000008196	TFAP2B	chr6:50786435-50815326	protein_coding	6149	0.0079	0.0327	0.0046	0.0104	0	0	0.0131	0	0.2427	0.1462	0.1033	0.1778	2.06	0.0767	0.0327	0.0495	0	0.0303	0	0
ENSG00000008197	TFAP2D	chr6:50681540-50740701	protein_coding	1856	0	0	0	0	0	0	0	0	0	0	0	0	0	0	0	0	0	0	0	0
ENSG00000008226	DLEC1	chr3:38080695-38165516	protein_coding	8338	0.1275	0.0543	0.13	0.0654	0.0526	0.045	0.058	0.0446	0.1454	0.0588	0.0938	0.0369	0.2195	0.0424	0.2971	0.3027	0.0195	0.0224	0.0141	0.0315
ENSG00000008256	CYTH3	chr7:6201406-6312275	protein_coding	5805	2.8964	2.7386	3.1839	2.9859	2.9837	2.2407	3.0264	2.7131	5.2377	5.1256	7.5835	5.6964	4.8057	2.8851	3.0562	3.2455	3.7884	7.5491	7.8942	8.2281
ENSG00000008277	ADAM22	chr7:87563457-87832204	protein_coding	12217	2.2582	2.1372	2.5471	2.8507	1.7347	1.5868	1.515	1.5796	0.7252	0.6156	0.7399	0.5928	0.887	0.1448	0.0877	0.0997	0.3325	0.2251	0.0792	0.0859
ENSG00000008282	SYPL1	chr7:105730948-105753022	protein_coding	2794	12.2084	9.8134	21.642	20.231	10.7502	9.9825	19.3154	19.7773	14.8879	10.5323	18.8337	18.4375	6.473	5.8677	13.7059	13.0035	6.1844	6.0902	14.6491	12.6617
ENSG00000008283	CYB561	chr17:61509664-61523739	protein_coding	5320	2.5338	2.5438	3.3133	3.6201	0.7967	0.7171	0.9594	1.0673	0.5259	0.7529	0.4592	0.8797	0.7157	0.1774	0.3209	0.3353	0.4887	0.6134	1.0747	1.0409
ENSG00000008294	SPAG9	chr17:49039534-49198226	protein_coding	11948	9.2077	8.6151	13.3231	13.266	8.1534	8.1756	12.2645	10.6414	16.5097	16.6659	22.6794	18.3784	12.9858	6.6535	15.7564	14.4903	7.0225	9.0914	14.986	14.4487
ENSG00000008300	CELSR3	chr3:48673901-48700348	protein_coding	13888	6.015	6.4408	3.401	4.9137	2.4364	2.4631	2.0967	2.234	1.9744	2.6545	1.4495	1.2495	1.7398	0.2633	0.6243	0.589	0.2067	0.1544	0.2998	0.342
ENSG00000008311	AASS	chr7:121715700-121784334	protein_coding	4591	105.691	125.307	140.711	179.971	12.0501	13.3491	17.2025	17.4762	14.3221	14.2795	18.8796	16.8386	11.2119	7.7457	8.1953	9.8376	0.9557	4.8133	6.7503	6.8368
ENSG00000008323	PLEKHG6	chr12:6419601-6437672	protein_coding	4260	3.7767	3.8736	3.87	4.1668	0.2402	0.2642	0.4729	0.3649	0.197	0.0768	0.1147	0.2325	0.3094	0.1938	0.2986	0.1941	0	0.0875	0.0206	0.0493
ENSG00000008324	SS18L2	chr3:42623331-42636606	protein_coding	1301	9.9155	7.4632	19.0735	16.6537	8.2574	7.7389	16.0227	16.2879	6.7387	4.8379	7.511	9.9253	3.4331	2.7651	6.3294	5.5183	1.7903	1.8275	6.1748	6.213
ENSG00000008382	MPND	chr19:4343523-4360083	protein_coding	2049	3.6784	4.5423	6.807	7.3471	5.029	4.1813	8.325	8.2471	4.6884	6.5825	8.0121	6.0686	3.1089	1.3815	3.0713	4.3532	0.8724	1.5699	2.3753	2.5104
ENSG00000008394	MGST1	chr12:16500075-16762193	protein_coding	6213	10.3893	8.9638	20.6585	20.4381	6.0577	5.8782	9.3953	8.8449	0.9757	0.592	0.6055	1.0007	0.7896	0.4176	0.3664	0.3852	0.5928	0.7203	3.2939	2.8048
ENSG00000008405	CRY1	chr12:107385141-107487607	protein_coding	5062	5.5359	4.4227	7.1447	6.7723	3.9558	4.2251	5.6835	6.3027	7.6647	6.9114	7.992	10.946	3.9055	4.1125	7.327	5.9826	1.3162	1.8051	4.5004	4.4068
ENSG00000008438	PGLYRP1	chr19:46522410-46526323	protein_coding	720	0.0671	0	0	0	0	0	0	0	0	0	0	0	0	0	0	0	0	0	0	0
ENSG00000008441	NFIX	chr19:13106421-13209610	protein_coding	6302	0.046	0.0319	0.0453	0.0204	0.0116	0.0198	0.0341	0.0322	1.036	1.7381	0.5892	0.6722	1.4523	0.2994	0.1859	0.3521	2.484	1.3094	1.2654	1.5825
ENSG00000008513	ST3GAL1	chr8:134467090-134584183	protein_coding	8730	0.559	0.4725	0.4835	0.4302	0.7283	0.8524	0.8493	1.3163	2.2969	2.0974	2.4178	2.3791	1.5349	0.5674	0.7247	0.5034	1.3092	1.7409	2.4382	2.3328
ENSG00000008516	MMP25	chr16:3096681-3110727	protein_coding	4126	1.815	1.6705	0.7535	1.128	0.0354	0.0758	0.0846	0.0491	0.0226	0.0396	0.0592	0.1159	0.0887	0.0858	0.1623	0.2425	0.1444	0.0339	0.0924	0.1018
ENSG00000008517	IL32	chr16:3115297-3131908	protein_coding	2924	0.1322	0.3269	0.1268	0.2964	0.05	0.0214	0.0276	0.0347	0.0638	0.1118	0.3008	0.4556	3.5058	4.9211	4.0869	2.9613	10.448	2.5829	7.029	7.4854
ENSG00000008710	PKD1	chr16:2138710-2185899	protein_coding	18532	5.5166	5.6331	1.5545	1.9001	6.8735	6.5398	3.0295	2.9672	7.0206	7.6617	3.1954	2.4369	5.3299	2.3771	2.1964	2.7705	3.5688	2.0226	1.4745	1.8127
ENSG00000008735	MAPK8IP2	chr22:51039113-51052409	protein_coding	6107	0.7674	0.5272	0.4577	0.3732	0.5864	0.5325	0.2023	0.2048	0.336	0.2142	0.088	0.33	1.163	0.3283	0.1315	0.1211	0.2217	0.1908	0.1152	0.1246
ENSG00000008838	MED24	chr17:38175349-38217468	protein_coding	6962	8.3	8.4186	9.1811	9.8619	8.7441	8.9915	10.3716	10.1701	8.1183	7.8901	8.6392	8.7684	5.8475	6.0735	6.0726	6.6498	4.6449	3.9709	5.3779	5.5526
ENSG00000008853	RHOBTB2	chr8:22844929-22877712	protein_coding	6580	1.8797	1.2157	1.7556	1.283	1.7993	1.6917	1.6167	1.7926	3.7278	3.3542	3.2226	3.9093	4.8739	4.2751	5.4789	4.3114	7.343	2.9261	3.1012	3.1748
ENSG00000008869	HEATR5B	chr2:37195525-37311485	protein_coding	8206	3.8094	3.8931	5.5057	5.6366	5.2544	5.708	8.1904	7.7223	5.4214	5.6979	6.7698	5.212	5.55	4.1323	6.3391	5.9333	2.3697	2.8974	4.1374	4.1128
ENSG00000008952	SEC62	chr3:169684422-169716161	protein_coding	7928	7.7214	5.9968	10.8506	10.8547	6.9043	6.76	10.0397	10.3036	9.3996	7.9392	11.2657	11.5478	7.9242	5.9062	11.7252	10.8832	5.9646	6.3684	12.1707	11.5628
ENSG00000008988	RPS20	chr8:56979853-56987069	protein_coding	2931	161.116	140.097	289.224	258.069	192.762	190.041	332.865	328.673	199.134	183.481	300.874	277.319	152.936	186.757	292.266	320.209	52.5775	115.507	208.395	206.173
ENSG00000009307	CSDE1	chr1:115259533-115301297	protein_coding	5755	112.069	97.384	179.144	174.085	116.954	110.577	174.153	165.225	119.909	111.755	163.379	150.189	101.427	111.224	173.646	166.589	104.898	123.609	186.838	175.609
ENSG00000009335	UBE3C	chr7:156931606-157062066	protein_coding	9218	10.032	8.9616	11.5909	11.6478	8.9666	8.4598	10.5464	11.3768	9.4602	9.9939	9.88	10.899	6.5293	7.6067	8.1197	7.0709	9.0493	9.0377	16.9688	16.3249
ENSG00000009413	REV3L	chr6:111620233-111804918	protein_coding	12417	2.5097	2.2892	1.7756	2.2516	5.5854	6.0134	4.5366	4.8285	8.7731	9.0913	7.9366	6.5449	7.9371	7.7605	8.8504	6.5458	7.6777	8.8306	8.8664	8.4309
ENSG00000009694	TENM1	chrX:123509752-124097666	protein_coding	12896	0.1424	0.3277	0.2013	0.3335	3.0488	3.5691	3.6141	3.6821	0.0506	0.0634	0.0606	0.0689	0.67	0.0503	0.1505	0.1586	0	0.0108	0.0023	0.0061
ENSG00000009709	PAX7	chr1:18957499-19075360	protein_coding	6313	0.0689	0.0638	0.0633	0.0407	0.0116	0.0099	0.0298	0	41.1004	45.9275	39.6725	26.0386	7.5853	4.4933	2.8262	5.8033	1.3128	0.1477	1.3747	1.4924
ENSG00000009724	MASP2	chr1:11086579-11107290	protein_coding	4251	0.1591	0.1183	0.0738	0.1133	0.0172	0.0441	0.0379	0	0.0658	0.0192	0.023	0.0241	0.0172	0	0.063	0.0205	0.0127	0	0	0
ENSG00000009765	IYD	chr6:150690027-150727105	protein_coding	10362	0	0	0.0028	0	0	0	0.0026	0.0065	0	0.0394	0.0094	0.0099	0.0636	0.0228	0.0097	0.0252	0	0	0	0
ENSG00000009780	FAM76A	chr1:28052489-28089633	protein_coding	4034	3.3775	2.9557	3.5706	3.6125	3.2428	3.5965	3.9821	4.2225	3.3987	2.999	3.2096	4.1071	3.1401	3.3331	4.3149	4.7782	2.7527	2.346	2.7473	2.5958
ENSG00000009790	TRAF3IP3	chr1:209929376-209955668	protein_coding	7753	0	0	0.0037	0.0041	0	0.0081	0.0035	0	0	0	0	0.0264	0.0189	0.0152	0.0043	0	0.1397	0.018	0.0719	0.1083
ENSG00000009830	POMT2	chr14:77741298-77787227	protein_coding	10012	2.0171	1.8542	2.1224	2.132	2.6059	2.6046	2.3879	2.1131	3.2511	3.2739	2.9573	2.8524	2.5743	2.0262	1.5446	1.5732	1.4283	1.5739	1.9796	2.1285
ENSG00000009844	VTA1	chr6:142468366-142545826	protein_coding	7194	6.4272	5.5596	10.8952	10.3559	5.1199	5.3026	8.144	8.6019	6.936	5.8176	8.3198	10.4277	5.659	7.5335	7.9939	7.7478	5.7224	6.7201	12.1613	12.2027
ENSG00000009950	MLXIPL	chr7:73007523-73038873	protein_coding	4815	0.7827	1.2225	0.5035	0.9133	0.2277	0.3247	0.318	0.1544	0.0194	0.034	0.0507	0.0213	0.2281	0.0122	0.007	0.009	0.1912	0	0.0487	0.0872
ENSG00000009954	BAZ1B	chr7:72854727-72936608	protein_coding	7053	32.21	28.6035	38.3778	36.8862	33.8204	33.2853	35.9998	35.9626	36.127	33.0191	29.6703	39.3142	20.1712	18.3365	18.0255	19.6673	7.3267	12.4597	19.305	19.0885
ENSG00000010017	RANBP9	chr6:13621729-13711796	protein_coding	3480	10.9403	9.7149	13.7285	14.8133	11.5711	10.5665	17.4531	15.9466	15.7052	14.8452	19.0523	19.0142	13.9498	12.5063	20.3825	18.4422	9.8839	7.9709	17.5747	15.6031
ENSG00000010030	ETV7	chr6:36322418-36356164	protein_coding	2369	0.3671	0.2761	0.3371	0.5284	0.0308	0.0264	0.034	0.0428	0	0.0345	0.0412	0.0288	0.0618	0.1743	0.0848	0.0735	0.0686	0.3542	0.4579	0.3213
ENSG00000010072	SPRTN	chr1:231472849-231490769	protein_coding	5906	1.9388	1.7463	2.5113	2.462	2.5862	2.2554	2.9974	3.2732	2.6056	2.6297	3.1602	3.5514	2.2068	2.3565	3.1343	3.0353	1.5958	1.5235	2.8892	2.6973
ENSG00000010165	METTL13	chr1:171750787-171783163	protein_coding	3843	8.6748	7.5405	12.7583	11.9023	7.3594	6.4115	11.5546	10.7291	6.1886	5.509	6.6366	8.5691	3.1628	3.4374	5.2611	5.0836	1.9028	3.5059	5.3023	5.0808
ENSG00000010219	DYRK4	chr12:4671369-4723325	protein_coding	5911	0.6294	0.9703	1.2498	1.2978	1.4218	1.8091	2.1041	2.0469	1.5463	1.3276	2.2566	1.9996	1.9324	1.9954	3.6243	3.1579	1.3562	1.2619	2.6685	2.6861
ENSG00000010244	ZNF207	chr17:30677135-30708905	protein_coding	15834	18.1128	16.5886	25.8385	24.8939	15.9278	17.0026	19.108	19.2185	18.1891	17.4749	22.1678	20.4007	13.119	12.0374	18.7918	18.2794	5.4666	6.3567	13.2857	12.5087
ENSG00000010256	UQCRC1	chr3:48636434-48648409	protein_coding	3236	33.1158	33.1457	55.4408	57.6404	38.618	37.4329	61.3544	55.9275	28.6486	25.033	34.7873	42.3843	16.9249	20.7571	21.7022	21.5942	17.3414	25.3699	31.7564	33.0725
ENSG00000010270	STARD3NL	chr7:38217823-38270272	protein_coding	4348	7.4673	5.982	12.0702	10.6232	7.5299	7.5941	11.3679	11.2474	8.43	7.6704	10.091	11.4236	7.7969	9.2366	9.0152	9.6669	5.1451	9.103	17.0602	16.5624
ENSG00000010278	CD9	chr12:6308880-6347425	protein_coding	3218	13.9029	13.617	25.6419	25.9641	0.4542	1.166	1.7196	1.9219	3.6228	5.2073	8.7303	11.8363	2.9352	3.0238	4.8266	5.3949	0.8585	3.5493	4.3277	4.6567
ENSG00000010282	HHATL	chr3:42734154-42744319	protein_coding	2891	0.0167	0.0174	0.0197	0.0222	0	0	0	0	0	0.0283	0.0507	0.0945	0.4559	0.8771	1.2621	0.8729	4.6466	1.1127	0.3854	0.5356
ENSG00000010292	NCAPD2	chr12:6602521-6641121	protein_coding	6487	37.1207	29.6256	37.6372	35.196	40.4777	37.3656	47.133	40.1841	34.3045	27.8103	33.4265	21.7435	12.3821	5.2727	7.1984	9.6184	2.8891	2.659	5.7807	5.4818
ENSG00000010295	IFFO1	chr12:6647540-6665239	protein_coding	5193	2.3353	2.1313	2.0542	2.1758	2.9975	2.7698	3.0003	3.2345	3.1071	3.9667	2.5309	2.355	2.8482	2.7255	2.9909	3.4856	8.1777	6.1764	6.7525	7.0954
ENSG00000010310	GIPR	chr19:46171501-46186982	protein_coding	4736	0.0408	0.0637	0.1506	0.122	0.1543	0.1849	0.2666	0.2284	0.1379	0.0345	0.1547	0.0505	0.4484	0.0125	0.2757	0.1011	0	0.0197	0.0371	0.0277
ENSG00000010318	PHF7	chr3:52444672-52457657	protein_coding	3367	1.6359	1.3298	1.1267	1.7923	1.7364	1.5416	1.9866	1.7365	1.1357	0.9954	0.9287	0.8015	1.0221	0.8232	1.0936	1.0209	0.3539	0.4708	0.3396	0.3274
ENSG00000010319	SEMA3G	chr3:52467068-52479101	protein_coding	5011	0.8099	0.6124	0.6887	0.6982	1.2542	1.223	1.2169	1.2073	2.2893	2.1369	3.3834	2.536	0.9352	0.1412	1.002	0.2779	0.1946	0.0372	0.0468	0.0419
ENSG00000010322	NISCH	chr3:52489133-52527087	protein_coding	9161	12.7578	11.3183	10.8068	10.8864	13.1786	13.3319	12.5971	12.6023	15.0778	15.0083	12.8055	10.042	13.2757	10.2548	11.1482	11.5843	7.249	5.6385	10.7919	11.3358
ENSG00000010327	STAB1	chr3:52529353-52558511	protein_coding	10588	0.0411	0.0285	0.0296	0.0485	0.0069	0.0295	0.0025	0.0223	0.0088	0.0077	0.0092	0.0161	0.0207	0.0278	0.0379	0.0164	0.0102	0.0044	0.0055	0.0099
ENSG00000010361	FUZ	chr19:50310125-50320633	protein_coding	2951	4.3223	4.603	4.5427	4.5467	5.6216	6.0608	6.017	6.0126	6.005	4.4874	4.9339	4.8966	2.7293	1.6387	2.0645	2.3886	1.5051	1.327	1.8579	1.9032
ENSG00000010379	SLC6A13	chr12:329788-372039	protein_coding	4241	0.0228	0.0475	0.0404	0.0303	0	0.0737	0.0063	0.0239	0.1979	0.1542	0.1613	0.1933	1.0877	0.7787	1.9338	1.6518	0.562	0.7475	0.6637	0.5569
ENSG00000010404	IDS	chrX:148558520-148615470	protein_coding	10496	5.1003	3.5374	2.8262	3.7952	2.2838	2.3058	2.1703	2.0737	2.7902	2.718	2.2856	2.4833	3.7322	2.3373	1.9869	2.0562	6.8483	3.771	5.1873	5.0483
ENSG00000010438	PRSS3	chr9:33750514-33799230	protein_coding	1614	0	0	0.0177	0	0	0	0	0	0	0	0	0.0212	0.0454	0	0.0207	0.0539	0	0	0	0.0325
ENSG00000010539	ZNF200	chr16:3272324-3286221	protein_coding	7498	1.3403	0.993	1.7575	1.3357	1.1209	0.9008	1.0963	1.1945	1.418	1.3409	1.414	1.5764	1.289	1.0225	1.3125	1.2999	0.7152	0.7399	1.3451	1.162
ENSG00000010610	CD4	chr12:6896023-6929974	protein_coding	4583	0.253	0.2305	0.2427	0.3642	0.3987	0.4776	0.3869	0.4056	0.0611	0.0535	0.0746	0.0745	0.0479	0	0	0	0.0355	0.0102	0.0512	0.0286
ENSG00000010626	LRRC23	chr12:6982732-7023407	protein_coding	3054	0.5062	0.3459	0.579	0.557	0.7897	0.7986	1.0907	1.0845	1.8629	1.713	2.5118	1.8568	2.1338	1.1779	3.5184	3.6188	1.3657	1.038	1.6416	1.4695
ENSG00000010671	BTK	chrX:100604434-100641183	protein_coding	4227	0.1257	0.0833	0.1282	0.1595	0.0519	0.074	0.089	0.048	0.0441	0	0	0.0485	0	0	0.0554	0.0206	0	0.011	0	0
ENSG00000010704	HFE	chr6:26087508-26098571	protein_coding	5675	0.3576	0.1684	0.392	0.3563	0.1545	0.1873	0.2509	0.2739	0.2465	0.5473	0.4821	0.3973	0.3097	0.0727	0.0708	0.0997	0.2195	0.2382	1.2296	1.0544
ENSG00000010803	SCMH1	chr1:41492871-41707826	protein_coding	4447	4.3676	4.084	3.9702	3.9771	9.8274	9.5907	9.4838	10.3131	8.1375	9.4297	8.3501	5.6	8.6113	5.0791	6.9853	6.7023	2.7406	3.7006	5.7162	6.1198
ENSG00000010810	FYN	chr6:111981534-112194655	protein_coding	7411	6.3042	5.2814	8.7942	7.5406	9.1412	8.548	8.9675	8.2132	12.2954	12.574	15.2689	18.2074	10.868	10.3288	12.5928	13.1572	4.8239	10.2033	11.3147	11.1513
ENSG00000010818	HIVEP2	chr6:143072603-143266338	protein_coding	9774	2.1552	2.517	2.3667	2.7291	2.8338	3.1671	2.086	2.0228	0.9542	1.3548	1.5497	1.5903	7.4239	10.6192	8.9353	6.8245	5.8578	9.2056	6.7854	6.6321
ENSG00000010932	FMO1	chr1:171217637-171255117	protein_coding	3574	0	0.0141	0.008	0.009	0	0	0	0	0	0.1601	0.2187	0.2772	0.4917	0.066	0.0094	0.3896	0	0.2609	0.6645	0.5948
ENSG00000011007	TCEB3	chr1:24069644-24088549	protein_coding	5391	13.0668	10.9465	13.5391	11.9677	9.1097	9.8021	9.3579	8.8708	13.4251	12.767	11.6552	11.6594	11.8978	13.9693	14.7345	11.3237	10.6706	12.7121	12.786	12.1897
ENSG00000011009	LYPLA2	chr1:24117459-24122029	protein_coding	2196	21.9134	18.7629	26.834	25.0824	11.9472	11.5618	15.7433	15.0977	13.7181	12.6187	12.1926	18.216	8.7358	10.9567	10.4415	8.7577	7.3752	7.6638	14.7264	14.7712
ENSG00000011021	CLCN6	chr1:11866206-11903201	protein_coding	6884	3.0671	3.7052	2.6559	2.8023	5.0214	5.3506	4.1129	3.9227	4.4032	4.9634	2.8035	2.6003	3.8823	3.5038	3.0391	2.5851	1.0937	2.4312	1.4481	1.6507
ENSG00000011028	MRC2	chr17:60704761-60770958	protein_coding	6860	4.8245	7.3044	5.5216	6.3168	28.3694	27.5123	28.2177	27.195	7.9127	8.0908	8.6536	4.9349	11.7622	0.4384	1.1125	1.4144	24.6119	7.4075	41.9145	45.4678
ENSG00000011052	NME2	chr17:49230950-49249105	protein_coding	1241	0	0	0	0	0	0	0	0	0	0	0	0	0	0	0	0	0	0	0	0
ENSG00000011083	SLC6A7	chr5:149569519-149602351	protein_coding	4391	0.011	0	0.0195	0	0.466	0.3988	0.4527	0.3464	0	0	0.0111	0.0311	0.0667	0.0134	0.0152	0	0.0617	0	0.0067	0.0239
ENSG00000011105	TSPAN9	chr12:3186520-3395730	protein_coding	5714	3.23	3.6891	4.3627	5.2861	2.558	2.8018	3.902	3.6612	36.9866	34.1761	42.677	42.6681	14.8773	13.2622	19.1798	17.9329	25.6235	17.4844	29.2782	30.0561
ENSG00000011114	BTBD7	chr14:93703895-93799438	protein_coding	11333	5.1457	4.6123	5.4287	5.0358	4.2882	4.9056	4.7335	5.3351	7.2174	7.934	7.5016	6.7158	5.3043	4.8602	5.3639	5.2215	2.2129	2.4558	4.2143	3.9437
ENSG00000011132	APBA3	chr19:3750816-3761697	protein_coding	5556	2.1566	2.1279	1.653	1.6812	1.8678	1.8459	1.552	1.4842	1.6283	1.8979	1.5477	1.1744	1.9768	1.4754	1.5243	1.7307	1.0042	1.0321	1.0765	1.2848
ENSG00000011143	MKS1	chr17:56282802-56296966	protein_coding	4073	3.4045	3.3474	4.951	5.1225	4.1807	4.2837	6.0149	5.7503	4.1447	4.054	4.7504	4.42	3.5774	2.5483	4.5366	4.5081	0.8777	0.9958	2.2243	2.1714
ENSG00000011198	ABHD5	chr3:43731604-43775863	protein_coding	3172	3.9755	3.41	6.8968	5.5049	1.198	1.5181	1.5667	1.5236	1.7054	1.5977	1.7252	2.2831	1.6158	1.1527	1.2241	1.2346	2.459	1.6461	2.9301	2.8709
ENSG00000011201	KAL1	chrX:8496914-8700227	protein_coding	7131	24.9197	21.8846	27.2505	27.3317	15.0958	13.8034	12.1977	8.0475	0.4447	0.7451	0.9044	1.7629	3.6143	0.8105	1.1266	0.8481	0.7368	0.8237	1.4267	1.3065
ENSG00000011243	AKAP8L	chr19:15490858-15529952	protein_coding	5081	16.1082	17.1691	13.7813	16.7221	16.5262	17.6372	17.0608	16.3895	18.5945	20.0133	23.1651	12.2632	22.9705	14.4734	27.9334	26.2642	8.0062	7.7715	8.9383	9.54
ENSG00000011258	MBTD1	chr17:49254785-49337524	protein_coding	7201	11.178	10.8709	12.9165	12.8064	6.2008	5.7838	6.6663	6.5801	8.1597	7.492	7.6332	6.058	8.6022	6.6417	9.0553	8.7977	1.9934	3.0816	2.9397	2.8208
ENSG00000011260	UTP18	chr17:49337888-49375297	protein_coding	2721	23.5627	18.4153	33.3548	28.9134	20.1704	20.5007	29.8837	30.5052	15.2188	14.0593	15.9273	20.15	8.3957	10.7066	11.1949	12.7127	2.568	5.8767	9.8916	8.5454
ENSG00000011275	RNF216	chr7:5659677-5821370	protein_coding	7619	8.0092	6.8871	7.5508	7.7181	8.3162	7.7483	8.1551	8.9649	9.3768	9.2696	8.6701	10.1778	8.2456	7.2913	9.2834	8.0352	6.0075	5.562	7.8888	8.2049
ENSG00000011295	TTC19	chr17:15902693-15948329	protein_coding	5966	10.0906	8.4327	12.5449	12.8803	8.1704	7.6729	10.7523	11.1712	8.9108	7.6865	9.4426	8.9496	4.3569	3.094	3.9668	3.7268	2.5876	3.0788	5.0422	5.4063
ENSG00000011304	PTBP1	chr19:797074-812327	protein_coding	6969	45.736	44.5918	34.0559	32.7387	42.1559	41.4486	32.7218	32.2158	36.8703	30.8484	21.6708	23.9405	16.0751	6.4566	7.1328	6.9678	4.2049	5.2714	7.3456	8.1869
ENSG00000011332	DPF1	chr19:38701645-38720354	protein_coding	4800	1.3085	1.677	1.6341	1.411	1.1723	1.4331	1.0465	0.8097	1.5156	1.4305	0.855	1.4518	1.2051	0.5774	0.2929	0.2901	0.079	0.2817	0.3054	0.3335
ENSG00000011347	SYT7	chr11:61282784-61348620	protein_coding	5953	2.7919	3.879	2.3573	2.4372	0.9084	1.0295	0.7716	0.5904	0.658	0.769	0.673	0.3099	0.7626	0.0693	0.298	0.402	0.0455	0.4229	0.5368	0.6392
ENSG00000011376	LARS2	chr3:45429997-45590913	protein_coding	5393	14.6835	13.7317	19.2459	21.5934	7.3853	8.5345	11.7652	11.1987	6.0529	6.4115	7.3203	10.0145	4.1138	4.2319	4.1711	4.5504	1.5769	2.6539	4.8331	4.769
ENSG00000011405	PIK3C2A	chr11:17099276-17229530	protein_coding	9204	22.8084	19.6176	25.4979	24.9562	15.7611	17.1221	18.7987	18.8225	17.7737	16.4923	16.4085	12.853	10.501	6.8238	12.911	9.7101	3.6017	4.4371	8.7696	7.9838
ENSG00000011422	PLAUR	chr19:44150246-44174699	protein_coding	4457	2.9919	2.1108	3.5773	2.9095	1.7217	2.0205	2.2361	2.3052	1.3602	1.7056	2.8393	2.8512	0.8543	0.0926	0.1051	0.2733	7.936	1.0251	14.9655	15.439
ENSG00000011426	ANLN	chr7:36429414-36493400	protein_coding	6012	28.6257	23.0375	34.8845	35.6383	18.8658	20.2525	26.0049	24.6449	21.9359	19.3343	23.0562	24.5296	6.1017	2.5504	2.0935	3.5391	0.7298	2.5512	9.3878	8.9095
ENSG00000011451	WIZ	chr19:15532318-15560762	protein_coding	8155	4.6271	3.6398	1.8922	1.8578	6.6225	6.4185	3.2545	3.2491	7.8799	6.9062	3.2353	3.4182	5.3602	3.9846	2.2206	3.0466	2.7764	1.9037	1.679	1.7314
ENSG00000011454	RABGAP1	chr9:125703111-125867145	protein_coding	8181	6.1125	6.3525	9.8457	10.4484	6.9767	8.118	10.7471	10.1295	8.7327	10.6612	14.0349	12.2262	9.138	8.7656	11.1007	11.4083	4.2441	6.1658	10.0096	9.5403
ENSG00000011465	DCN	chr12:91539024-91576900	protein_coding	8083	0	0.0062	0.0176	0.004	0.0181	0.0077	0.0033	0.046	72.1392	83.5525	106.381	85.1759	17.7186	10.3091	9.4173	12.7416	2.9821	28.3766	36.8023	36.2831
ENSG00000011478	QPCTL	chr19:46195740-46207247	protein_coding	2396	2.8432	2.9606	3.476	3.5501	4.0871	4.5936	5.034	3.8649	3.3476	3.1387	3.3239	2.7232	1.5891	1.4029	1.6905	1.9794	2.2155	1.5177	2.6676	2.8917
ENSG00000011485	PPP5C	chr19:46850250-46896238	protein_coding	7059	11.1907	9.3435	12.0046	11.3998	11.2121	10.6575	12.227	11.864	9.3676	7.4806	8.0152	10.1868	5.4145	5.4386	4.5144	4.4257	4.3892	3.4672	6.2219	5.8816
ENSG00000011523	CEP68	chr2:65283499-65314138	protein_coding	8623	5.0595	4.7083	7.5416	6.812	5.1444	4.888	6.1806	5.3499	6.6951	7.0244	8.5616	7.1903	6.1986	5.2045	8.0395	7.9221	4.1836	3.8115	4.8282	4.9365
ENSG00000011566	MAP4K3	chr2:39476406-39664453	protein_coding	6067	10.9419	10.3488	14.4798	15.0096	7.7453	7.3699	9.214	8.7681	10.2229	10.3205	11.339	9.1779	6.9395	5.4336	7.2609	6.8777	4.5444	5.9552	10.1532	9.2353
ENSG00000011590	ZBTB32	chr19:36195428-36207940	protein_coding	2770	0	0	0	0	0	0.0226	0.0097	0	0	0	0	0	0.0264	0.0213	0	0.0314	0	0	0	0.0095
ENSG00000011600	TYROBP	chr19:36395302-36399197	protein_coding	907	0.0533	0	0	0	0.0806	0	0	0.0373	0	0	0	0	0	0	0	0	0	0	0	0
ENSG00000011638	TMEM159	chr16:21169697-21191937	protein_coding	2558	5.1375	4.5628	8.4519	8.194	5.3711	5.9651	10.1969	10.7415	1.5313	1.6936	2.9988	2.1501	4.036	1.8674	7.9824	5.3241	1.0376	2.4786	4.0689	4.0628
ENSG00000011677	GABRA3	chrX:151334705-151619830	protein_coding	4193	0.749	0.8759	1.0816	1.0181	1.7255	1.1782	1.4094	1.2574	0.089	0.0585	0.0233	0.0896	0.454	0.0141	0.0718	0.0623	0.0129	0.0222	0.007	0.0438
ENSG00000012048	BRCA1	chr17:41196311-41277500	protein_coding	8278	10.7451	8.4355	12.2387	11.6017	9.9936	8.8917	9.4399	9.427	6.9741	5.5693	6.3509	7.8614	2.6447	1.4177	1.3425	2.2286	0.4908	0.5857	1.1653	0.9511
ENSG00000012061	ERCC1	chr19:45910590-45982086	protein_coding	5576	5.5455	6.1984	7.6933	8.3355	10.97	10.8115	12.3667	11.6252	9.2999	9.866	10.3922	12.3692	6.8283	7.5408	6.5015	7.616	4.7989	4.7824	11	11.2911
ENSG00000012124	CD22	chr19:35810163-35838258	protein_coding	5839	0.0083	0	0.0147	0.044	0	0.0321	0.0046	0.0058	0	0	0	0	0.0125	0	0.0057	0.0224	0	0.008	0	0
ENSG00000012171	SEMA3B	chr3:50304989-50314977	processed_transcript	5767	0.687	0.9945	0.6182	0.7013	1.5207	1.6591	1.5558	1.3596	6.2911	8.221	7.0743	5.5148	2.4758	1.36	2.403	2.95	0.5542	0.6548	1.4896	1.4744
ENSG00000012174	MBTPS2	chrX:21857753-21903542	protein_coding	8927	0.9796	0.8059	0.7476	0.7515	1.7519	2.1016	1.5076	1.4273	2.4657	2.6646	1.9539	1.6531	2.272	2.0743	2.6698	2.7539	1.4138	1.457	1.5469	1.4052
ENSG00000012211	PRICKLE3	chrX:49031150-49042845	protein_coding	3396	1.7926	1.5259	1.3018	1.2476	2.6469	2.9095	2.0645	1.9804	1.0162	1.035	0.5755	0.4426	0.7762	0.4515	0.7097	0.6022	0.319	0.302	0.4662	0.7342
ENSG00000012223	LTF	chr3:46477135-46526724	protein_coding	4247	0	0	0	0	0	0	0	0	0	0	0	0	0.1034	0	0.0158	0	0.0765	0.4062	0.1933	0.1483
ENSG00000012232	EXTL3	chr8:28457985-28613116	protein_coding	13220	11.6877	9.0914	9.1048	10.4769	9.757	9.8346	11.7326	12.6904	7.9015	7.7105	7.4693	7.4394	6.4248	6.8519	6.0694	6.2798	4.9701	4.0695	5.58	5.6816
ENSG00000012504	NR1H4	chr12:100867485-100958191	protein_coding	3460	0	0	0	0.0093	0	0	0	0	0	0	0	0	0	0	0.0193	0	0	0	0	0
ENSG00000012660	ELOVL5	chr6:53132195-53213947	protein_coding	4223	32.2176	30.2118	51.9794	52.9781	45.842	43.6851	80.3847	82.5511	29.1526	24.5633	40.6679	34.363	13.9055	11.3393	16.1068	19.9061	6.6442	8.3348	24.008	22.7452
ENSG00000012779	ALOX5	chr10:45869660-45941561	protein_coding	3685	0.3802	0.5324	0.2554	0.5575	0.1983	0.2376	0.1385	0.2843	0	0	0.0133	0.0185	0.0199	0	0.0091	0	0	0.0127	0	0
ENSG00000012817	KDM5D	chrY:21865750-21906825	protein_coding	9463	0	0	0.003	0.0034	0	0	0.0142	0.0107	0	0	0.0052	0.0975	0	0	0.0141	0.0046	0	0	0.0031	0.0139
ENSG00000012822	CALCOCO1	chr12:54104902-54121529	protein_coding	6296	2.1027	2.4451	2.8677	2.906	1.3233	1.3508	1.4037	1.4171	7.8808	9.1402	9.9022	4.8344	16.0722	13.947	18.2522	18.0236	11.8296	8.4931	13.4721	13.7222
ENSG00000012963	UBR7	chr14:93673400-93695561	protein_coding	3694	11.4182	8.7163	15.7746	13.0254	9.5555	8.6677	12.7696	12.6532	9.2408	8.3424	10.8723	15.2031	6.4221	7.0723	8.3911	7.0084	3.2993	2.726	7.2306	6.934
ENSG00000012983	MAP4K5	chr14:50885218-51027844	protein_coding	7620	7.4692	5.6912	8.2723	7.9404	8.2767	8.0099	8.8097	9.181	11.9704	10.1159	12.2725	10.6741	8.2253	4.5507	6.6069	7.4745	5.0186	4.7231	14.7173	13.6386
ENSG00000013016	EHD3	chr2:31456879-31492313	protein_coding	4959	3.4977	3.0537	3.7156	3.8513	1.4148	1.3115	1.5547	1.9764	1.0156	1.2692	0.8769	1.2193	1.7275	0.8324	0.9113	0.7721	2.7089	2.7827	7.3076	8.2135
ENSG00000013275	PSMC4	chr19:40476911-40487348	protein_coding	2387	32.2842	24.1324	37.2214	32.6364	18.0635	17.7889	19.4915	19.6947	20.0833	23.2865	18.7086	38.8692	17.9447	31.1541	23.6575	21.4183	20.1282	17.4018	34.5272	34.9076
ENSG00000013288	MAN2B2	chr4:6576901-6625089	protein_coding	8898	0.733	1.0516	0.7693	0.9127	1.1663	0.9769	0.9208	1.0711	1.3941	1.773	1.1916	1.3399	1.6129	1.1532	1.0345	1.022	2.855	2.4415	4.5504	4.7102
ENSG00000013293	SLC7A14	chr3:170177371-170303863	protein_coding	10459	0.1617	0.1154	0.1691	0.132	1.2717	1.3154	2.2473	4.9052	0.0178	0.0156	0.028	0.0033	0.133	0.0282	0.0064	0.0166	1.3983	5.9729	4.9646	4.617
ENSG00000013297	CLDN11	chr3:170136652-170578169	protein_coding	6032	0.3284	0.1751	0.4681	0.2767	4.2041	4.3128	8.0829	9.3569	0.1392	0.0678	0.0162	0.0453	0.4127	0.0391	0.0333	0.0361	2.9005	11.0598	19.4084	20.8055
ENSG00000013306	SLC25A39	chr17:42396992-42402238	protein_coding	3526	26.9117	28.2651	30.1646	32.3807	20.8713	20.9105	23.8763	22.2564	16.3996	18.0362	16.2679	21.1785	11.5458	10.8212	9.5314	10.3656	11.3833	8.0917	15.1003	15.9875
ENSG00000013364	MVP	chr16:29831714-29859355	protein_coding	6136	0.4646	0.6887	0.4788	0.8736	0.8456	1.1109	2.1364	1.9278	1.3984	2.9974	2.2216	2.9451	1.7303	2.1913	3.6496	2.9215	16.8521	12.9161	35.2156	36.0597
ENSG00000013374	NUB1	chr7:151038784-151075535	protein_coding	5411	7.5182	6.6106	10.7427	10.043	6.0372	5.5822	7.5063	6.7519	6.6188	6.2693	7.8919	7.7274	6.4682	5.166	9.1742	8.001	4.6849	3.6617	9.1897	9.0455
ENSG00000013375	PGM3	chr6:83870868-83903655	protein_coding	7331	10.0901	9.2301	14.8585	16.5856	9.57	9.5114	15.5255	15.324	9.6689	9.0874	12.7097	11.7939	9.1888	6.6848	21.5382	17.865	8.0242	5.9077	18.161	16.8969
ENSG00000013392	RWDD2A	chr6:83903097-83908651	protein_coding	4686	1.4538	1.4923	1.8199	2.1851	1.2944	1.5614	1.8631	2.1709	2.1894	1.7618	2.8569	2.4348	2.2813	1.9003	4.2289	4.4477	1.5258	1.0446	2.9094	2.2346
ENSG00000013441	CLK1	chr2:201717731-201729422	protein_coding	5125	5.2322	4.064	10.5631	5.95	6.8874	8.8954	10.2839	9.8653	16.4513	20.4156	22.3084	27.4953	19.5731	17.9508	50.7432	39.3255	4.7667	4.5755	9.5481	8.6899
ENSG00000013503	POLR3B	chr12:106751435-106903976	protein_coding	4858	4.3064	3.1586	4.4504	4.6516	3.6856	2.8964	3.3509	3.5063	3.9549	3.3316	2.4943	5.7591	3.2707	4.1759	2.956	3.1527	2.598	2.9173	4.0738	4.1435
ENSG00000013523	ANGEL1	chr14:77253587-77292589	protein_coding	5347	6.533	6.2193	5.8411	6.3032	6.1914	6.4209	5.5012	4.7595	5.3724	6.0233	5.9578	2.9069	6.4908	3.5624	7.0241	8.1212	1.6918	2.7464	2.6155	2.5081
ENSG00000013561	RNF14	chr5:141337892-141369856	protein_coding	4834	4.4177	3.1326	5.4815	4.8872	4.2179	3.3636	5.307	5.74	4.0517	3.8216	4.892	6.3742	5.4832	6.0632	9.286	8.1639	10.1633	10.107	14.6899	13.9255
ENSG00000013563	DNASE1L1	chrX:153629578-153640449	protein_coding	4130	2.094	2.0952	1.989	2.5648	2.7781	2.6498	3.7985	3.9198	1.4905	2.098	1.9402	2.0844	2.3225	2.3846	4.4254	3.2449	11.6465	2.7317	7.1204	8.2862
ENSG00000013573	DDX11	chr12:31226778-31257725	protein_coding	8374	12.272	10.4115	10.5759	11.1007	9.1634	9.1258	8.796	9.101	8.6428	7.1454	7.7601	6.2904	5.1326	3.7818	3.3978	3.7099	1.2743	1.2638	1.7786	1.9556
ENSG00000013583	HEBP1	chr12:13127797-13153207	protein_coding	3442	1.6423	2.1924	1.9308	2.0889	1.7623	1.9077	2.1384	1.9049	1.3548	0.9499	1.6608	0.9825	1.5529	0.2913	1.1087	1.1377	0.7554	1.5576	2.0188	1.5478
ENSG00000013588	GPRC5A	chr12:13043715-13070871	protein_coding	8440	0.0286	0.0477	0.0304	0.0266	0	0	0.0032	0	0.0221	0.0484	0.0637	0.1093	0.1648	0.1467	0.1626	0.1134	1.0012	2.7894	2.1712	2.2357
ENSG00000013619	MAMLD1	chrX:149529688-149682448	protein_coding	5958	0.1622	0.1267	0.0622	0.1185	0	0.042	0.0271	0.0057	0.2505	0.7683	0.5494	0.5046	4.5102	5.048	3.9778	3.5346	0.8728	3.0673	0.8858	0.8589
ENSG00000013725	CD6	chr11:60739114-60787849	protein_coding	5995	0.0081	0	0.0095	0.0107	0.0853	0.1147	0.0762	0.0958	0.0156	0.0273	0	0.0456	0.0611	0.059	0.0838	0.0944	0.009	0.0311	0	0
ENSG00000013810	TACC3	chr4:1723226-1746898	protein_coding	4682	21.5364	14.5921	21.2	20.1353	12.1905	10.6854	16.2485	13.9749	11.8724	7.1058	10.4773	9.04	3.3936	1.1714	1.2726	2.4534	0.1157	0.4481	2.0414	2.1188
ENSG00000014123	UFL1	chr6:96969470-97003152	protein_coding	4539	7.2701	6.75	9.8594	11.4915	10.9323	11.2563	18.1512	16.7383	11.5068	9.8869	17.4382	12.2825	10.7596	8.4971	26.7408	23.735	6.0265	5.9263	15.0181	13.2347
ENSG00000014138	POLA2	chr11:65029232-65073060	protein_coding	5726	7.0625	5.1574	8.4083	7.9265	7.1855	6.8041	8.7963	7.7793	6.727	6.4098	8.1318	10.8341	4.693	7.1785	8.1493	9.339	0.9176	1.5958	4.7466	5.225
ENSG00000014164	ZC3H3	chr8:144519824-144623623	protein_coding	3731	3.5741	3.5328	2.0947	2.6154	3.3494	2.7656	2.2464	1.9747	2.7747	3.5712	1.8727	2.0509	2.5905	2.2445	1.7675	2.0642	1.2486	1.1621	1.1159	1.1254
ENSG00000014216	CAPN1	chr11:64948036-64979477	protein_coding	7553	9.5888	14.514	12.7941	14.7764	6.0763	5.7709	5.6229	5.4143	6.063	7.3377	5.5179	5.3233	5.8844	6.6289	6.2401	6.4233	7.3795	8.9622	10.3333	10.9694
ENSG00000014257	ACPP	chr3:132036210-132087142	protein_coding	4193	0.3111	0.4679	0.3061	0.3904	0	0.0298	0.0192	0.0564	0.0667	0	0.0816	0.4807	0.0349	0.0141	0.008	0.0104	0.0129	0.0111	0.1608	0.0626
ENSG00000014641	MDH1	chr2:63815742-63834331	protein_coding	4993	30.6746	27.9507	56.925	57.839	16.9199	19.1128	34.4863	31.8202	14.2711	14.2267	20.1387	22.4409	9.9426	13.0631	14.1659	16.5051	17.0214	31.8018	30.1119	30.4068
ENSG00000014824	SLC30A9	chr4:41992488-42092474	protein_coding	7225	13.6686	13.1396	22.3758	21.9025	14.7274	14.1518	18.0882	17.2141	13.025	11.4835	13.4777	15.4326	9.4148	8.8398	10.7348	11.3701	6.6874	8.6077	14.7144	14.2462
ENSG00000014914	MTMR11	chr1:149900542-149908791	protein_coding	4591	0.863	0.8109	0.9878	0.9858	0.4298	0.4359	0.5793	0.6993	1.6861	1.6024	1.9795	1.3542	2.169	0.8221	0.9697	0.8719	0.4837	1.0358	2.4715	2.218
ENSG00000014919	COX15	chr10:101471600-101491857	protein_coding	4177	9.0685	8.2986	12.5644	12.4874	11.9672	11.6479	16.4958	16.5059	10.5168	12.1332	15.955	11.3515	8.1337	7.1157	10.3299	10.4064	4.6944	6.172	8.6196	8.1239
ENSG00000015133	CCDC88C	chr14:91737666-91884188	protein_coding	12426	5.9101	5.4779	4.1087	4.7246	3.1582	2.9995	2.5185	2.4587	2.4619	2.3024	1.9188	1.9711	1.697	0.3559	0.4903	0.5603	0.9895	0.6453	0.5427	0.4984
ENSG00000015153	YAF2	chr12:42550905-42632151	protein_coding	10840	0.7265	0.3202	0.8815	0.4382	1.5978	1.6096	2.0098	2.2604	2.9511	3.235	3.7591	2.9938	2.6613	2.6766	4.879	4.0541	0.9944	1.0795	2.1151	2.0264
ENSG00000015171	ZMYND11	chr10:180404-300577	protein_coding	5300	9.0705	8.2014	13.3248	12.9242	6.7841	7.2212	7.998	9.0932	18.3013	19.5102	22.3554	24.0157	15.1276	16.7683	15.2591	16.173	10.3939	9.9309	17.0162	16.8654
ENSG00000015285	WAS	chrX:48534984-48549818	protein_coding	2381	0.0203	0.1902	0.1318	0.1483	0.4297	0.3414	0.1354	0.1845	0.1175	0.2403	0.2462	0.0717	0.1538	0.0495	0.1546	0.0548	0.0455	0.0587	0.1108	0.0331
ENSG00000015413	DPEP1	chr16:89679715-89704839	protein_coding	2712	0.1603	0.3896	0.3576	0.3787	0.0808	0.4151	0.2377	0.2243	0.0344	0	0.036	0.0378	0.351	0	0.0247	0.016	0	0	0	0
ENSG00000015475	BID	chr22:18216905-18257536	protein_coding	4418	4.6368	3.4162	4.9517	4.3374	1.4391	1.2739	1.5262	1.8512	3.6943	4.3665	4.302	4.9254	1.475	1.7353	1.1971	1.822	1.9249	3.3345	4.3534	4.77
ENSG00000015479	MATR3	chr5:138609440-138667360	protein_coding	14669	51.4868	45.23	87.5702	82.6194	53.2773	50.9277	74.6422	76.1227	53.4522	50.3415	59.7343	79.6464	35.834	47.5313	36.566	40.2156	17.6913	24.2648	38.955	35.7582
ENSG00000015520	NPC1L1	chr7:44552133-44580914	protein_coding	5252	0.046	0.0192	0.0217	0.0122	0.2366	0.262	0.1586	0.1995	0	0	0	0.0195	0.0279	0	0.0446	0.0331	0	0.0089	0	0
ENSG00000015532	XYLT2	chr17:48423452-48440499	protein_coding	5472	7.6552	6.6932	5.0613	5.5903	4.4073	4.4914	4.0549	4.0517	5.0281	6.767	6.4378	5.631	5.0446	2.6943	4.9	4.0712	3.8705	2.607	5.4759	5.7313
ENSG00000015568	RGPD5	chr2:110550334-110615272	protein_coding	14175	0.1636	0.0958	0.1026	0.0679	0.1753	0.2426	0.1137	0.1144	0.3224	0.3114	0.2103	0.1205	0.3254	0.1789	0.1818	0.175	0.0573	0.0954	0.0641	0.0815
ENSG00000015592	STMN4	chr8:27092839-27115937	protein_coding	3294	0	0	0.0693	0.039	0.0222	0.019	0.0245	0.0513	0.1699	0.2482	0.4302	1.0993	2.5563	0.2327	0.7723	0.4359	0	0	0	0.0159
ENSG00000015676	NUDCD3	chr7:44418719-44530479	protein_coding	10113	4.811	4.8653	7.0763	7.2335	6.3809	5.924	7.4482	7.6095	6.3081	7.1291	7.3291	7.6375	5.8067	4.9159	6.7226	6.5269	5.5168	4.8173	6.9667	7.2351
ENSG00000016082	ISL1	chr5:50678920-50690564	protein_coding	3216	0.015	0.1564	0.1419	0.1198	0.0454	0.0583	0.0752	0.1261	0.464	0.61	0.5925	0.3718	2.3223	1.9621	0.8015	1.2177	0.0842	0.2899	0.0365	0.0653
ENSG00000016391	CHDH	chr3:53846361-53880417	protein_coding	7758	2.927	2.7885	2.9155	2.9997	1.0833	0.9915	1.153	1.1152	0.3366	0.3161	0.3716	0.4932	0.5002	0.228	0.1079	0.1066	0.0279	0.1502	0.189	0.1522
ENSG00000016402	IL20RA	chr6:137321107-137366298	protein_coding	4673	0.2378	0.2153	0.1587	0.316	0.0938	0.1071	0.1495	0.1519	0.0399	0.105	0.0732	0.1316	0.3604	0.366	1.0888	1.1546	0.5448	2.0452	2.7544	2.5048
ENSG00000016490	CLCA1	chr1:86934050-86965972	protein_coding	3340	0	0	0.0085	0	0	0	0	0	0	0	0	0	0	0	0	0.0261	0.0162	0.014	0	0
ENSG00000016602	CLCA4	chr1:87012760-87046437	protein_coding	3649	0	0.0138	0.0078	0	0	0	0	0.0093	0	0	0	0	0.0201	0	0	0	0	0.0128	0	0
ENSG00000016864	GLT8D1	chr3:52728504-52740048	protein_coding	3783	6.8839	6.2637	9.6432	10.1819	7.8045	8.1828	11.7804	11.0333	8.3084	7.8652	10.4874	9.0301	6.4453	3.9284	6.017	6.1074	5.8133	5.5209	15.8105	15.6021
ENSG00000017260	ATP2C1	chr3:130569438-130735556	protein_coding	8533	11.9018	9.8755	15.4128	15.2311	11.5706	11.5135	16.3324	15.3081	8.5036	8.8994	10.8907	9.436	7.0535	7.6023	5.3626	7.1796	11.2422	6.9768	13.2079	12.9451
ENSG00000017373	SRCIN1	chr17:36686250-36762183	protein_coding	11025	0.9729	1.0632	0.3751	0.5182	0.8949	1.004	0.4727	0.4016	0.1946	0.3114	0.1462	0.1146	0.8634	0.1284	0.0425	0.0513	0.0098	0.0085	0.0027	0.0143
ENSG00000017427	IGF1	chr12:102789644-102874423	protein_coding	8087	0	0.0062	0	0	0	0	0	0	0.0461	0.1718	0.1148	0.1563	2.2545	0.2042	0.0248	0.0323	0.0134	0.0519	0.0399	0.0389
ENSG00000017483	SLC38A5	chrX:48316919-48328644	protein_coding	4016	3.8137	3.3197	4.6733	4.6357	1.3284	1.308	2.3211	2.7014	3.9016	3.7655	5.122	8.3531	1.4403	3.0544	1.4253	1.441	0.4721	0.0348	3.9277	3.6007
ENSG00000017621	MAGIX	chrX:49019060-49024822	protein_coding	4948	0.0586	0.122	0.0404	0.0714	0.0295	0.0253	0.0977	0.0956	0.0565	0.0991	0.079	0.1036	0.1924	0.2741	0.1827	0.2638	0.0766	0.0848	0.1304	0.1379
ENSG00000017797	RALBP1	chr18:9475006-9538114	protein_coding	4979	20.145	19.5922	22.7653	23.3051	16.4098	16.3531	18.921	16.8475	13.9366	13.5444	14.592	12.5693	11.3823	12.0931	12.9418	11.4742	13.2942	18.1647	17.3183	16.7352
ENSG00000018189	RUFY3	chr4:71569920-71673032	protein_coding	8070	5.4901	5.3239	5.4818	5.8469	5.1075	4.665	4.7934	4.7868	8.2287	9.3087	8.9666	8.4746	11.4322	10.7496	8.7688	10.3521	5.2489	5.7885	7.7894	7.7789
ENSG00000018236	CNTN1	chr12:41086243-41466220	protein_coding	7492	0.9609	1.202	2.5736	2.1165	0.0585	0.0417	0.0502	0.1353	0.2988	0.2946	0.2935	0.2781	3.059	0.3149	0.5406	0.2846	0	0.2053	0.3639	0.4344
ENSG00000018280	SLC11A1	chr2:219246751-219261617	protein_coding	8676	0	0.0116	0.0066	0.0333	0.0084	0.036	0.031	0.0039	0.043	0.0283	0.0619	0.0157	0.0422	0.0272	0.0231	0.0502	0.0125	0	0.0135	0.003
ENSG00000018408	WWTR1	chr3:149235021-149454501	protein_coding	8413	1.6367	1.6445	1.7799	2.0565	3.1706	3.4713	4.847	5.6281	4.7448	8.0159	10.2562	13.5336	18.9731	26.0482	35.0177	29.3349	41.7728	120.054	97.74	91.063
ENSG00000018510	AGPS	chr2:178257371-178408564	protein_coding	8197	11.1047	8.5066	15.3799	14.43	13.9974	12.4813	17.749	17.4158	10.7523	9.6132	9.6503	11.5647	6.4136	6.3959	6.5339	7.1289	5.1213	8.5766	14.9225	13.5494
ENSG00000018607	ZNF806	chr2:133066881-133076309	pseudogene	1774	0.1634	0.0567	0.0643	0	0.1236	0.1058	0.0454	0.0762	0	0.0922	0.0551	0	0.1651	0.0332	0.0755	0.0491	0	0	0	0
ENSG00000018610	CXorf56	chrX:118672111-118699397	protein_coding	2606	9.1587	6.7375	14.0971	11.7752	6.9547	7.1991	12.38	11.6849	6.7999	6.0225	7.6495	10.5786	5.6756	6.11	8.3492	8.582	3.9908	3.7746	9.1243	7.7745
ENSG00000018625	ATP1A2	chr1:160085548-160113381	protein_coding	6298	14.361	9.8893	8.7814	9.8925	39.3253	32.8966	34.519	32.1654	9.0038	10.2535	9.6586	3.39	11.7306	4.9347	7.6536	8.0348	16.4702	8.3498	14.897	15.3513
ENSG00000018699	TTC27	chr2:32853098-33046118	protein_coding	3185	10.2091	7.882	12.1523	11.8215	8.5586	7.8931	10.3065	10.7067	6.5594	6.4675	7.7929	9.0094	4.5748	5.0918	6.5161	7.1038	2.602	4.2594	7.1526	6.1964
ENSG00000018869	ZNF582	chr19:56887412-56904914	protein_coding	3152	0	0	0	0	0.4405	0.3571	0.2727	0.4503	0	0	0	0.0325	0.0465	0.0374	0.0212	0.069	0	0	0	0.0083
ENSG00000019102	VSIG2	chr11:124617367-124622134	protein_coding	1432	0.0675	0.1757	0.2789	0.4035	0	0	0	0	0	0	0.0341	0.0239	0.0511	0	0	0.0304	0	0.0326	0	0
ENSG00000019144	PHLDB1	chr11:118477154-118528741	protein_coding	21988	3.307	3.0591	2.8356	2.8116	1.7516	1.9112	1.7116	1.5739	2.0657	2.5763	2.071	1.9638	4.349	2.2985	3.2975	3.2631	6.0922	3.7104	3.8802	4.3278
ENSG00000019169	MARCO	chr2:119699741-119752236	protein_coding	2079	0	0	0	0	0	0	0	0	0	0	0.047	0	0	0.1702	0.0966	0.0837	0	0.0224	0	0.0505
ENSG00000019186	CYP24A1	chr20:52769987-52790512	protein_coding	3972	0.0243	0.0127	0.0287	0.0646	0.1104	0.0472	0.0271	0.0085	0.1174	0.1646	0.0369	0.473	0.1106	0.0148	0.0506	0.0438	0.1364	0.0235	0.0148	0.0066
ENSG00000019485	PRDM11	chr11:45115563-45247734	protein_coding	5527	0.8392	0.5097	0.5212	0.5982	0.2512	0.43	0.418	0.4953	1.2994	1.2128	0.9282	1.0075	1.2718	1.0883	1.3021	1.0864	1.2643	0.8097	0.6419	0.6648
ENSG00000019505	SYT13	chr11:45261851-45307870	protein_coding	5424	3.9194	3.9049	4.4382	4.2017	0.4446	0.7148	1.1539	1.1216	0.2579	0.4672	0.5855	0.6235	2.1329	0.0979	0.5061	0.2968	0.01	0.0258	0.0649	0.0919
ENSG00000019549	SNAI2	chr8:49830248-49834299	protein_coding	2282	0.0847	0.0441	0.175	0.0422	13.4504	14.0309	24.9911	23.5777	15.1221	11.5342	19.3553	31.0172	9.337	5.7887	9.2266	11.9932	5.6968	8.662	25.0151	23.0698
ENSG00000019582	CD74	chr5:149781199-149792492	protein_coding	3184	3.0652	4.203	3.5564	3.4074	12.096	11.6273	11.2969	9.5319	0.4394	0.2311	0.0767	0.2146	0.4599	0.0185	0.0105	0.0273	0.017	0.981	0.0552	0.0495
ENSG00000019991	HGF	chr7:81328321-81399754	protein_coding	8897	0.0163	0.017	0.0224	0.0289	0.0821	0.0703	0.1449	0.1861	0.1887	0.3308	0.5382	0.2342	1.3661	0.053	0.0263	0.0538	0.1522	0.9013	1.3907	1.2035
ENSG00000019995	ZRANB1	chr10:126630691-126676758	protein_coding	5993	8.1264	7.7399	12.0553	12.3509	7.1337	7.3357	11.1028	10.5287	12.5123	10.4752	17.0066	14.0736	10.9226	8.6299	20.5267	16.7858	6.8059	5.6709	9.6866	9.9581
ENSG00000020129	NCDN	chr1:36023073-36032875	protein_coding	4917	6.2396	6.8348	5.4817	5.2747	2.8239	2.9379	2.6551	3.0656	4.3058	4.7712	3.1599	4.4325	4.7354	5.3372	4.711	3.4158	9.0113	5.4897	6.0165	6.1327
ENSG00000020181	GPR124	chr8:37641708-37702414	protein_coding	7061	0.3421	0.6555	0.3514	0.4864	1.2834	1.4436	1.868	2.6708	11.2406	16.543	9.8258	9.4243	8.2854	0.6932	1.0382	1.6823	1.9792	4.6217	6.4443	7.2031
ENSG00000020219	CCT8L1P	chr7:152142561-152144235	pseudogene	1674	0.0289	0	0	0.0192	0.0873	0.0374	0.016	0	0	0	0	0	0.0437	0	0.04	0	0	0	0	0
ENSG00000020256	ZFP64	chr20:50668201-50820847	protein_coding	6997	5.1443	3.8539	4.325	3.8626	3.6869	3.9683	4.3229	3.7675	2.1994	2.1963	2.1856	2.1189	2.3336	1.5761	1.1003	1.2313	0.7354	1.2859	2.1203	2.1717
ENSG00000020426	MNAT1	chr14:61201459-61436671	protein_coding	3865	6.1503	5.3889	8.6564	8.7783	5.9939	6.9575	8.6809	8.3858	12.9825	11.3572	14.702	11.5608	11.2341	12.1455	21.3402	22.1214	4.5408	4.6801	12.6304	11.5568
ENSG00000020577	SAMD4A	chr14:55033814-55260033	protein_coding	12170	1.2386	1.0169	0.9164	1.0418	1.255	1.4182	1.5606	1.7162	2.0922	3.5196	3.2881	3.0203	8.5193	12.6862	16.3986	13.797	11.4209	14.526	8.9451	9.2619
ENSG00000020633	RUNX3	chr1:25226001-25291612	protein_coding	4605	0.2098	0.2294	0.0372	0.0558	0.2063	0.3395	0.315	0.2055	0.1215	0.0355	0.0106	0.0445	0.0795	0	0.0145	0	0.0353	0	0	0.0057
ENSG00000020922	MRE11A	chr11:94152894-94227074	protein_coding	3538	14.6802	12.4991	22.71	22.9806	10.5758	10.2342	15.7016	16.9079	13.2861	11.1131	16.0056	14.0486	5.0497	3.9171	5.4213	6.0138	3.6132	3.5446	4.7153	4.2874
ENSG00000021300	PLEKHB1	chr11:73357222-73373864	protein_coding	4933	3.3594	3.3961	4.6082	3.9822	1.8518	1.7621	1.8624	2.5144	0.2836	0.2154	0.2872	0.0831	0.6382	0.0478	0.2782	0.3705	0.0878	0.2552	0.107	0.1543
ENSG00000021355	SERPINB1	chr6:2832565-2842240	protein_coding	3226	2.8606	3.5868	4.7921	5.6516	5.7993	5.0595	7.4443	7.5954	1.4455	0.9629	1.1359	0.8789	1.6115	1.8098	2.2517	2.5492	3.9962	1.3729	4.7442	4.3767
ENSG00000021461	CYP3A43	chr7:99425635-99463718	protein_coding	2630	0.0184	0.0383	0	0	0.0556	0.0713	0.0306	0.0257	0	0.0311	0.0186	0.026	0.0557	0	0.0636	0.0331	0	0.0177	0	0
ENSG00000021488	SLC7A9	chr19:33321414-33360672	protein_coding	2597	0.0372	0.0194	0.0988	0.0247	0.0563	0.0482	0.0621	0	0.2155	0.0944	0.1505	0.1578	0.0846	0.1135	0.0902	0.0838	0.0209	0.018	0.0226	0.0202
ENSG00000021574	SPAST	chr2:32288679-32382706	protein_coding	5213	11.613	9.7569	15.9984	15.6028	6.8553	6.1061	8.0439	8.5643	10.4126	8.9849	11.3315	14.1741	7.8656	6.3351	9.253	10.1245	4.042	4.6414	7.4071	7.5666
ENSG00000021645	NRXN3	chr14:78708733-80330762	protein_coding	11335	0.8354	0.5015	0.38	0.4049	5.635	5.6219	2.4576	1.9291	2.1805	2.6034	2.2458	1.8474	2.1252	0.9833	1.0011	0.7908	0.1147	0.1275	0.0802	0.0949
ENSG00000021762	OSBPL5	chr11:3108345-3187969	protein_coding	7466	1.8767	2.7021	1.1728	1.6724	2.7799	2.5045	2.2847	2.123	2.6733	3.0437	2.0811	1.3955	2.1478	0.7662	1.1657	1.0082	1.7122	0.9179	1.1545	1.2022
ENSG00000021776	AQR	chr15:35147731-35262040	protein_coding	9779	14.7035	11.6783	17.6111	17.0455	10.2159	9.618	12.5592	12.1757	12.9232	11.1425	10.962	13.7635	8.4908	9.2026	8.5439	8.3872	3.2238	4.2667	7.9242	7.093
ENSG00000021826	CPS1	chr2:211342405-211543831	protein_coding	10444	1.5636	1.9268	2.9304	2.7999	6.4866	6.7183	10.0079	10.2743	3.2774	3.0759	4.5519	2.162	2.3416	0.9543	1.3878	2.4497	0.3267	1.2499	1.996	1.8494
ENSG00000021852	C8B	chr1:57394882-57431813	protein_coding	2729	0	0	0	0	0	0	0	0	0	0	0	0	0	0	0	0	0	0	0	0
ENSG00000022267	FHL1	chrX:135229558-135293518	protein_coding	4945	7.1422	6.8775	11.8185	9.6977	9.3993	8.334	11.8587	11.0583	11.6182	12.2985	15.4038	15.5157	26.4008	43.0997	38.3478	23.9157	27.2094	25.4829	23.6925	23.2135
ENSG00000022277	RTFDC1	chr20:55043646-55093943	protein_coding	3501	8.6528	7.8604	16.5628	15.1278	10.2075	9.7886	18.2461	18.8918	14.9716	15.4332	20.6825	24.9693	13.0295	20.1461	25.8249	26.5093	14.1877	11.9312	27.7197	28.0055
ENSG00000022355	GABRA1	chr5:161274196-161326975	protein_coding	5494	0.0088	0.0092	0.0519	0.0467	0	0	0	0.0123	0	0	0.0089	0.0187	0.04	0	0.0305	0.1188	0	0	0	0.0048
ENSG00000022556	NLRP2	chr19:55464497-55512510	protein_coding	6313	15.1458	14.1134	18.524	19.1025	3.5886	3.4869	4.5573	4.3417	3.8264	3.0558	2.4921	3.7121	2.3661	1.887	2.2747	1.9919	0.7207	1.3662	1.3236	1.1474
ENSG00000022567	SLC45A4	chr8:142217264-142318404	protein_coding	8608	2.4696	2.0573	1.8058	1.76	2.0206	2.2231	1.7538	1.6726	1.3435	1.1965	1.0841	1.0437	1.1994	0.5618	0.63	0.7279	0.5475	0.6337	0.4258	0.5152
ENSG00000022840	RNF10	chr12:120971282-121015397	protein_coding	5911	16.0124	15.303	17.0093	16.28	10.3483	11.0346	12.1885	11.5724	10.9029	11.6301	10.9853	10.1367	10.3804	9.9269	11.728	10.99	12.4352	9.2435	13.6353	13.395
ENSG00000022976	ZNF839	chr14:102783713-102809044	protein_coding	5595	2.2797	2.3109	2.3807	2.662	2.3772	2.4366	2.6503	2.6035	2.8005	2.3814	2.4713	2.5033	2.0546	1.3913	1.5555	1.9753	0.4744	0.7083	1.4306	1.5198
ENSG00000023041	ZDHHC6	chr10:114190057-114206672	protein_coding	2404	8.6822	8.3291	14.6528	12.4442	9.3631	8.7925	8.7606	8.3929	9.5439	9.2147	9.8166	12.1495	8.0713	5.2006	6.071	6.3891	3.0193	4.0724	6.8786	7.1396
ENSG00000023171	GRAMD1B	chr11:123396343-123498482	protein_coding	9770	2.9523	3.1566	2.4494	3.1803	0.6059	0.7489	0.5307	0.5154	2.9593	2.6355	3.1706	2.8147	4.5866	4.1408	7.7775	6.3107	4.6294	3.8985	2.4428	2.5787
ENSG00000023191	RNH1	chr11:494511-507300	protein_coding	7367	4.9974	4.6027	4.3982	4.8015	4.841	5.6959	5.9655	5.6198	5.4944	6.8461	5.9358	8.3976	5.1086	7.4687	6.8611	6.7213	9.0878	6.2712	11.6011	11.7131
ENSG00000023228	NDUFS1	chr2:206979540-207024327	protein_coding	12268	11.3068	9.6083	13.6126	14.5945	8.4649	8.0541	10.7907	11.0167	11.3352	10.9807	11.1116	13.8448	9.8837	11.7196	13.1216	12.1617	8.8085	11.6929	13.7323	13.2033
ENSG00000023287	RB1CC1	chr8:53535015-53658403	protein_coding	7615	22.6697	20.2096	28.103	30.8845	8.5029	9.0992	10.9532	10.5939	17.257	14.7812	19.0689	15.1312	14.2499	11.3222	19.1744	16.7645	9.7024	10.6218	13.9415	12.9755
ENSG00000023318	ERP44	chr9:102741460-102861322	protein_coding	4854	6.9676	6.5607	9.3253	8.5636	5.7061	6.2098	7.9526	8.5084	7.7049	7.477	9.2706	9.6346	7.3613	7.1803	13.7578	14.7636	4.5306	5.0327	10.7455	10.3051
ENSG00000023330	ALAS1	chr3:52232101-52248343	protein_coding	2536	16.9179	15.3546	21.0545	22.4538	10.2301	11.7625	16.7892	16.5385	13.6075	14.1824	16.1451	16.7167	14.0031	14.2316	25.3562	20.2457	15.8699	22.0046	21.6888	21.6388
ENSG00000023445	BIRC3	chr11:102188214-102210134	protein_coding	7484	0.0258	0.0202	0.0381	0.0515	0.0293	0.0501	0.0503	0.1084	0.0374	0.0874	0.0457	0.0685	0.0978	0.0394	0.1163	0.064	0.0072	0.461	0.1293	0.1052
ENSG00000023516	AKAP11	chr13:42846288-42897396	protein_coding	9913	8.1102	6.7803	8.0132	7.8716	8.1389	8.2831	7.6499	6.9141	9.7002	10.291	9.7935	8.4049	11.6113	8.293	14.9658	11.5043	7.3603	11.3433	9.0918	9.2898
ENSG00000023572	GLRX2	chr1:193065597-193075244	protein_coding	1299	3.1615	1.3555	2.591	1.6309	1.8566	2.4552	2.2954	3.3823	4.1643	3.3351	3.9118	5.9696	3.2693	7.2638	5.2311	5.2923	3.6695	7.5725	6.5229	5.6973
ENSG00000023608	SNAPC1	chr14:62229074-62263146	protein_coding	2656	4.5659	3.58	6.1534	7.9159	4.1548	5.3448	8.5767	7.2531	4.4597	4.1856	8.0758	5.8264	4.1903	3.4416	8.4063	11.0907	4.0584	2.9488	11.3369	10.1379
ENSG00000023697	DERA	chr12:16064105-16190220	protein_coding	2848	5.242	5.6351	12.8992	9.5462	13.3177	12.516	18.9964	17.6934	6.3204	6.6014	8.4749	7.7006	3.3422	3.4787	3.4203	4.3542	5.6868	3.2247	11.3962	10.2746
ENSG00000023734	STRAP	chr12:16035324-16056412	protein_coding	2211	71.3689	49.6494	102.041	87.3962	58.6695	56.54	87.5986	91.7449	50.8726	38.7453	49.9421	66.5911	30.6989	38.8885	47.9929	45.1838	40.3495	36.7306	87.3344	79.5152
ENSG00000023839	ABCC2	chr10:101542488-101611949	protein_coding	6232	0.1395	0.1372	0.1236	0.1185	0.1642	0.1003	0.1681	0.2223	0.1946	0.1705	0.2822	0.2083	0.282	0.1893	0.1611	0.1396	0.0522	0.0673	0.0565	0.0463
ENSG00000023892	DEF6	chr6:35265594-35289548	protein_coding	2675	1.752	1.6926	1.4075	1.7039	0.3278	0.5377	0.5021	0.8212	0.523	0.5806	0.3836	0.3831	0.4927	0.022	0.1126	0.1789	0.1012	0.2266	0.1973	0.2845
ENSG00000023902	PLEKHO1	chr1:150121372-150136916	protein_coding	6629	4.2054	3.7567	5.1417	4.3095	4.3767	4.1508	3.9226	4.6701	9.9612	8.8783	7.7022	11.1619	7.6987	8.2557	8.0642	6.0452	7.7381	8.4251	10.836	11.4097
ENSG00000023909	GCLM	chr1:94350760-94374966	protein_coding	5374	2.868	2.7991	4.2991	4.4737	0.9655	0.8029	1.2897	1.3018	1.0934	1.0647	1.5001	2.0659	0.8311	0.7023	1.3641	1.5626	4.7272	1.5615	7.8072	7.4327
ENSG00000024048	UBR2	chr6:42531799-42661242	protein_coding	8997	6.9328	7.3029	9.4282	9.7755	8.9432	9.9327	11.0592	9.8494	8.573	9.558	10.682	8.6342	8.3825	8.2721	11.0612	11.4182	4.2987	6.1869	6.7196	6.9132
ENSG00000024422	EHD2	chr19:48216599-48246391	protein_coding	3923	3.1775	2.4109	0.5017	0.8182	0.7265	0.9246	0.2191	0.2326	4.636	8.4805	2.5158	1.7764	7.3351	6.915	2.9182	3.4605	9.1682	8.4017	4.7234	4.7899
ENSG00000024526	DEPDC1	chr1:68939834-68962904	protein_coding	5904	14.3456	11.7763	21.7445	20.6161	12.8485	12.9754	18.9732	17.8486	12.7641	8.5287	12.3555	8.6501	3.0136	0.869	0.7881	1.9898	0.0367	0.308	2.8256	2.4093
ENSG00000024862	CCDC28A	chr6:139094656-139114456	protein_coding	1496	5.2643	4.8762	8.9991	7.8315	2.6379	2.1319	4.2198	4.089	5.4239	3.8795	6.532	5.9827	2.5451	1.8528	3.6696	4.2755	1.0138	1.1219	3.5081	2.3683
ENSG00000025039	RRAGD	chr6:90074354-90121989	protein_coding	5072	3.6579	3.7296	5.3311	5.1641	4.9566	4.8949	5.2751	4.9576	12.9455	11.9745	13.5924	10.3385	16.8471	27.7772	22.8615	23.0166	21.8504	12.5649	10.96	10.2088
ENSG00000025156	HSF2	chr6:122720690-122754264	protein_coding	2702	8.6724	6.5912	12.7728	11.8083	15.1192	15.9002	24.4469	24.2281	16.2923	14.1582	23.851	22.9466	13.7661	12.0914	25.1736	22.2869	5.3726	6.5564	10.9811	10.0139
ENSG00000025293	PHF20	chr20:34359895-34538303	protein_coding	7812	12.4127	11.2507	19.1975	19.3364	10.9078	9.8624	16.9457	15.4664	8.2139	8.5384	13.0279	11.0458	6.561	5.2164	10.4252	9.8863	4.3752	3.8372	9.5742	8.5834
ENSG00000025423	HSD17B6	chr12:57145944-57181574	protein_coding	2272	0.9357	0.8636	1.4814	1.992	0.386	0.4954	0.6621	0.6545	0.4516	0.5397	0.6882	0.5864	0.2578	0.1038	0.4715	0.2873	1.2397	0.041	0.7614	0.6238
ENSG00000025434	NR1H3	chr11:47269850-47290396	protein_coding	4346	2.3679	2.3731	2.9927	3.3162	1.7152	1.7123	2.7753	2.5974	0.8799	1.0157	1.3154	0.9118	0.7918	0.5835	1.8023	1.672	0.1745	0.354	0.5937	0.6522
ENSG00000025708	TYMP	chr22:50964180-50968485	protein_coding	3320	0.0582	0.0758	0	0.0677	0.1321	0.1319	0.1133	0.1018	0.1966	0.1477	0.0441	0.1029	0.2426	0.0533	0.0302	0.0393	0	0.1966	0.159	0.1976
ENSG00000025770	NCAPH2	chr22:50946644-50961901	protein_coding	3159	13.4285	12.9157	15.3221	15.1907	14.4357	13.0259	14.9663	15.545	14.8506	13.7143	13.2395	19.573	6.4668	5.0591	4.4823	4.9861	2.5549	2.4793	4.8912	5.5163
ENSG00000025772	TOMM34	chr20:43570770-43589127	protein_coding	2062	15.3474	13.1019	20.223	15.2242	33.4569	32.6026	38.1055	33.2067	14.1573	13.7559	16.1127	17.8922	11.1855	10.4675	9.7727	8.525	10.1136	7.2349	12.413	11.9383
ENSG00000025796	SEC63	chr6:108188959-108279393	protein_coding	8587	4.7657	4.3824	6.1914	7.4948	5.6681	6.1466	7.0011	7.3718	6.9078	7.9486	10.8962	11.4612	6.8897	6.2084	14.3571	13.6862	3.7659	4.403	10.7211	9.8472
ENSG00000025800	KPNA6	chr1:32573638-32642169	protein_coding	7687	27.1273	22.324	23.7211	23.4089	14.888	15.1236	15.2992	14.2758	15.2027	14.5152	12.9156	13.6874	13.1829	13.8245	13.8172	11.9886	12.9445	14.4886	17.8768	16.7119
ENSG00000026025	VIM	chr10:17270257-17279592	protein_coding	4965	96.9414	91.3673	73.8827	80.9477	462.638	462.554	423.874	427.398	367.693	429.752	359.453	322.783	563.524	258.055	352.154	373.485	180.501	252.76	285.935	284.449
ENSG00000026036	RTEL1-TNFRSF6B	chr20:62290652-62330037	protein_coding	8738	0.3041	0.2476	0.1893	0.1616	0.1505	0.1932	0.1998	0.2127	0.4803	0.4771	0.2404	0.4535	0.176	0.1755	0.1188	0.1593	0.0806	0.1441	0.1711	0.1892
ENSG00000026103	FAS	chr10:90750413-90775542	protein_coding	3562	1.0851	0.4943	1.049	1.0724	1.2515	1.387	1.5008	1.4801	0.3928	0.459	0.3018	0.8919	0.6989	0.1821	0.733	0.3909	3.1782	3.9264	7.0788	6.6899
ENSG00000026297	RNASET2	chr6:167342991-167370679	protein_coding	7478	1.5765	1.8299	1.6401	1.8672	1.3389	1.3548	1.4082	1.2971	1.11	0.9401	1.2414	0.6624	0.9498	0.2366	0.3402	0.4422	0.3115	0.3741	0.6116	0.6352
ENSG00000026508	CD44	chr11:35160416-35253949	protein_coding	10060	1.3736	0.9002	0.6464	1.1359	1.5037	1.2868	1.7303	1.794	0.5099	0.8857	1.1511	2.2581	1.1718	0.2697	1.6371	1.0683	10.8549	4.2912	22.1789	20.2543
ENSG00000026559	KCNG1	chr20:49620192-49639666	protein_coding	6320	3.2949	2.7543	1.39	1.2342	3.4921	2.6716	1.7554	1.7059	1.3134	1.4486	0.402	0.5405	0.9384	0.0746	0.053	0.0551	0.4028	0.2065	0.7933	1.0423
ENSG00000026652	AGPAT4	chr6:161551010-161695093	protein_coding	9419	3.7753	4.9246	5.3781	5.4355	6.6571	7.8145	7.9684	7.492	5.248	5.5021	5.5037	3.6195	4.9285	2.1663	1.8054	2.5407	0.9604	2.3164	2.6303	2.6748
ENSG00000026751	SLAMF7	chr1:160709036-160724611	protein_coding	4604	0	0.0109	0	0	0	0	0	0	0	0.0178	0	0	0	0.0256	0	0	0	0	0	0
ENSG00000026950	BTN3A1	chr6:26402464-26415444	protein_coding	5547	0.7055	0.8616	0.7044	1.1052	0.4611	0.5186	0.615	0.7433	3.2619	3.6104	4.2368	2.2786	2.7192	0.3189	1.8104	1.6865	1.1327	2.0507	4.0329	3.7897
ENSG00000027001	MIPEP	chr13:24304327-24463558	protein_coding	3407	4.2969	4.1789	6.9318	7.311	5.0408	6.0205	8.1763	7.9259	5.037	3.8868	3.9581	6.9685	1.5044	1.8694	1.3362	1.3026	1.8124	2.2441	3.6057	3.6204
ENSG00000027075	PRKCH	chr14:61654276-62017694	protein_coding	8809	0.4607	0.5483	0.4695	0.6413	0.0166	0.0142	0.0549	0.046	0.6035	0.6774	0.7821	0.3102	0.4322	0.2142	0.38	0.3853	0.5165	0.471	0.6058	0.569
ENSG00000027644	INSRR	chr1:156809854-156828810	protein_coding	5101	0	0	0.0391	0.0126	0.0287	0.0123	0.0211	0.0066	0.0914	0.1923	0.2969	0.1272	0.201	0.0347	0.1641	0.1535	0.3186	0.0731	0.0172	0.0309
ENSG00000027697	IFNGR1	chr6:137518620-137540586	protein_coding	2680	6.7244	7.5276	13.2821	13.3065	6.9263	7.047	10.695	11.6019	7.3778	7.7472	12.9258	11.0513	7.6772	6.7995	11.4161	11.9655	5.1741	8.3846	11.312	10.762
ENSG00000027847	B4GALT7	chr5:177027100-177037348	protein_coding	4927	2.1377	2.0422	2.2519	2.3714	1.8986	2.1197	2.0773	2.051	2.8016	2.6711	1.9635	2.9328	2.3035	2.6333	1.6849	1.6867	6.2335	1.7599	4.6356	4.991
ENSG00000027869	SH2D2A	chr1:156776034-156786654	protein_coding	2512	0.9617	1.1416	0.5677	0.5111	0.5528	0.4232	0.385	0.4171	0.2228	0.0976	0.214	0.0544	0.0583	0.0235	0.0267	0.0173	0	0.0371	0	0
ENSG00000028116	VRK2	chr2:58134785-58387055	protein_coding	3557	7.6473	5.5161	8.6842	8.5187	5.6089	4.9931	6.4948	6.328	3.0678	3.1713	2.7884	3.976	1.6674	1.3429	1.0352	1.4557	1.4771	1.966	4.1296	3.9104
ENSG00000028137	TNFRSF1B	chr1:12227059-12269285	protein_coding	3766	0.6415	0.4809	0.4544	0.4432	0.3105	0.4982	0.5421	0.5923	0.0743	0.0434	0.1168	0.1451	0.175	0.047	0.0178	0.0231	0	0.2723	0.1401	0.1394
ENSG00000028203	VEZT	chr12:95611521-95696566	protein_coding	8757	7.327	7.4858	10.8071	12.206	7.1687	7.3555	9.1291	9.3629	10.4588	10.7347	13.2066	11.6249	9.6741	9.3608	11.3988	11.2442	8.0227	8.0707	15.7193	14.3852
ENSG00000028277	POU2F2	chr19:42590262-42700737	protein_coding	8899	0.5484	0.5031	0.2468	0.4797	0.0903	0.1195	0.0332	0.0456	0.1048	0.1194	0.1043	0.0921	0.4608	0.0729	0.0339	0.1467	0.1461	0.0471	0.1647	0.2212
ENSG00000028310	BRD9	chr5:850405-892939	protein_coding	9577	4.7472	4.2603	4.6967	4.7861	4.1664	4.2705	4.788	4.6688	4.7427	4.2591	4.0559	4.4302	3.3869	2.6786	3.0828	2.9168	1.2669	1.9861	3.1073	2.9842
ENSG00000028528	SNX1	chr15:64386321-64438289	protein_coding	9796	4.1479	3.3382	4.6586	4.5055	6.2666	5.8731	7.4232	6.8622	6.4837	6.0831	7.6262	7.8218	4.8136	3.5579	4.1791	4.1219	3.2735	3.1172	6.2613	6.4967
ENSG00000028839	TBPL1	chr6:134273307-134311570	protein_coding	5039	5.7433	4.4728	8.3717	7.5357	3.3502	3.6114	4.9205	5.0638	3.4982	2.5955	3.607	4.8133	1.9326	1.7204	1.581	1.7356	0.989	1.064	3.4736	3.3176
ENSG00000029153	ARNTL2	chr12:27485786-27576241	protein_coding	5002	6.5682	4.8378	7.4642	7.7326	1.388	0.9502	0.9828	1.3175	0.4102	0.7027	0.5568	1.3386	0.2488	0.1061	0.2811	0.2871	0.6497	0.8761	3.13	2.786
ENSG00000029363	BCLAF1	chr6:136578000-136610989	protein_coding	9297	32.3295	26.2991	48.3321	47.7386	29.0059	27.1818	30.5554	33.0551	43.5283	39.6974	39.6256	80.9909	24.076	36.4037	29.3045	27.1681	14.0879	16.287	34.8412	32.2622
ENSG00000029364	SLC39A9	chr14:69864731-69929105	protein_coding	7136	7.4477	6.3451	9.7726	9.1132	9.4116	8.7723	9.9117	9.5527	10.5866	10.3094	10.4209	12.413	8.6087	8.4542	8.6312	8.2254	6.194	6.1802	10.1524	10.029
ENSG00000029534	ANK1	chr8:41510738-41754280	protein_coding	10799	0.9485	0.8945	0.5837	0.7342	0.0677	0.0869	0.0274	0.0876	0.3455	0.3633	0.2036	0.5852	1.7697	3.9974	1.5468	2.0791	3.4459	3.2637	0.5892	0.6416
ENSG00000029559	IBSP	chr4:88720732-88733074	protein_coding	1033	0.0468	0	0.0276	0	0	0	0	0	0	0	0	0	0.0709	0	0	0	0	0	0	0
ENSG00000029639	TFB1M	chr6:155578642-155635627	protein_coding	2736	6.2513	4.7441	5.7754	6.652	5.8497	5.9656	7.7662	7.3745	3.7497	3.8541	3.6966	2.6844	2.5424	2.177	3.3278	3.4987	1.1879	2.1981	3.4827	3.6258
ENSG00000029725	RABEP1	chr17:5185557-5289129	protein_coding	6555	10.7686	10.6221	17.1396	16.7715	13.2114	12.4882	17.4085	18.5044	14.2852	13.3681	16.8305	19.2405	11.2595	12.9461	14.4773	13.8664	11.0978	13.1146	19.0228	17.7882
ENSG00000029993	HMGB3	chrX:150148981-150159248	protein_coding	3967	47.1701	44.818	87.8107	78.9071	29.0149	27.0039	35.2121	34.7765	35.9241	28.2709	36.395	37.5106	12.2742	7.1207	8.0668	11.1437	1.8843	3.22	6.563	6.212
ENSG00000030066	NUP160	chr11:47799638-47870107	protein_coding	8471	18.0461	13.0539	23.8827	19.9957	14.8732	16.4037	23.7424	22.7413	11.9129	11.8015	13.9812	16.9493	5.8604	4.1631	6.1368	5.9737	1.9887	2.438	4.1291	3.9439
ENSG00000030110	BAK1	chr6:33540328-33548019	protein_coding	2267	7.8216	7.8116	14.0285	14.2865	4.0941	4.7723	8.9701	8.7213	3.4147	3.6418	6.4011	8.1672	4.3926	5.0727	7.1319	6.5833	4.5159	4.6887	10.243	9.9674
ENSG00000030304	MUSK	chr9:113431050-113563859	protein_coding	4159	0	0.0121	0.0069	0.0154	0	0	0	0.0081	3.3414	5.8766	5.498	3.3101	12.2709	17.4267	16.7732	15.9544	18.9239	12.1845	12.3509	11.9073
ENSG00000030419	IKZF2	chr2:213864428-214017151	protein_coding	12220	0.7473	0.774	1.0433	0.9876	0.909	0.9672	0.8793	0.8131	0.5495	0.689	0.6077	0.4864	1.1804	0.4729	0.6985	0.8474	0.5452	0.5875	0.643	0.7302
ENSG00000030582	GRN	chr17:42422613-42430470	protein_coding	3520	17.5416	19.7235	13.9614	17.8457	12.7061	12.1342	13.0117	12.789	11.8173	13.1438	7.9674	8.9187	12.7928	12.9506	9.8805	8.6898	27.9605	19.5087	21.2897	22.0762
ENSG00000031003	FAM13B	chr5:137273648-137387650	protein_coding	6808	3.9387	4.1087	6.1084	5.7096	6.0435	6.1269	7.055	7.645	7.9457	7.5643	9.4446	9.3681	6.5713	7.3889	9.8829	8.5642	3.9702	5.6015	6.602	6.5417
ENSG00000031081	ARHGAP31	chr3:119013219-119139561	protein_coding	9384	0.2626	0.2734	0.0973	0.1847	0.3972	0.2932	0.2662	0.3854	0.9243	1.6899	1.5151	1.8711	8.2318	8.176	6.9559	6.3755	3.2094	1.7438	3.9586	4.195
ENSG00000031544	NR2E3	chr15:72084976-72110600	processed_transcript	3595	0.2016	0.3499	0.0793	0.1607	0.1016	0.0696	0.1196	0.141	0	0.0682	0.0272	0.019	0.0407	0.0328	0.0279	0.0363	0	0.0259	0.0571	0.0292
ENSG00000031691	CENPQ	chr6:49431090-49460820	protein_coding	1733	8.5869	7.7511	16.4749	12.6134	5.1869	4.8715	7.2388	8.8148	6.0276	4.6696	6.7382	7.3328	2.3238	1.3612	2.2406	2.7116	0.6564	0.4842	2.2163	1.5901
ENSG00000031698	SARS	chr1:109756539-109780791	protein_coding	3836	22.6587	23.4234	37.4079	37.0187	67.5939	47.8477	63.9076	59.6024	21.4931	23.291	30.7217	33.4038	28.9942	28.1951	34.0673	34.5729	19.1052	20.8913	51.3392	48.8345
ENSG00000031823	RANBP3	chr19:5916149-5978153	protein_coding	7445	7.8264	6.5818	6.5665	6.1912	6.8614	6.8878	6.5524	6.9682	7.0404	7.0049	5.2502	7.7131	5.2026	5.3151	3.4081	3.5884	2.5901	2.7364	4.1271	3.9903
ENSG00000032219	ARID4A	chr14:58765102-58840605	protein_coding	7568	2.426	2.1538	3.2864	3.41	3.5633	3.9911	5.0474	4.89	4.4489	4.0828	6.1978	4.6944	4.5376	2.5247	5.8429	5.3296	1.3026	1.8973	3.7966	3.2215
ENSG00000032389	TSSC1	chr2:3192695-3381653	protein_coding	5775	2.6186	2.7703	3.5956	3.6962	3.0118	3.5085	5.1167	5.3255	3.3915	3.5528	4.0356	4.0106	2.6626	2.5631	2.5794	3.5487	2.2792	2.002	3.6402	3.4083
ENSG00000032444	PNPLA6	chr19:7598889-7626650	protein_coding	7055	8.1427	9.7766	4.2046	5.3596	4.2781	4.565	3.8229	3.9713	3.4504	3.9394	2.0846	2.852	2.3248	2.1984	1.4187	1.6837	3.3168	1.6784	2.7885	2.9127
ENSG00000032742	IFT88	chr13:21140584-21265503	protein_coding	5480	1.49	1.4138	2.5139	2.0969	3.1873	3.4463	4.1324	4.5145	5.3611	4.9821	5.0642	4.4446	3.327	2.2276	2.1746	2.8346	1.3146	2.1778	3.3813	3.041
ENSG00000033011	ALG1	chr16:5083702-5137380	protein_coding	5786	3.1397	3.4432	4.2493	3.8611	2.5766	2.4535	2.8599	2.7103	1.6281	1.441	0.988	1.7889	1.1642	1.1823	0.7232	0.7746	1.7038	1.2972	2.0421	2.3359
ENSG00000033030	ZCCHC8	chr12:122957416-122985518	protein_coding	7752	4.8801	4.1016	5.6331	5.6769	4.6854	4.4934	4.6885	4.1984	3.6455	4.4288	4.122	4.6314	3.8726	2.7159	3.7136	3.1769	1.118	1.0043	1.9213	1.7774
ENSG00000033050	ABCF2	chr7:150904922-150924316	protein_coding	4448	13.5995	10.5075	17.8201	16.1936	13.7848	11.7396	15.5391	16.2221	14.7406	16.0618	14.9719	22.3796	10.9798	14.5178	14.3363	12.4625	11.094	12.9336	24.7381	23.7718
ENSG00000033100	CHPF2	chr7:150929574-150935908	protein_coding	4200	4.8085	6.4923	5.2427	6.1522	4.7502	5.0625	5.1231	5.4236	8.2607	8.1937	6.8985	6.759	9.693	6.487	14.1706	11.2922	16.9465	9.7124	25.78	25.8753
ENSG00000033122	LRRC7	chr1:70034080-70617628	protein_coding	14652	0	0	0.0039	0.0022	0	0	0.0018	0.0138	0.1018	0.0725	0.0534	0.1259	0.6197	0.6641	0.0525	0.0416	0.0037	0.035	0.012	0.0054
ENSG00000033170	FUT8	chr14:65877309-66210839	protein_coding	6889	10.3938	7.3832	9.7421	8.8994	3.2674	3.6583	4.3907	4.5183	4.048	4.4852	4.3122	4.2844	3.6562	3.6724	4.9902	4.9328	2.3588	3.7829	6.5627	6.5334
ENSG00000033178	UBA6	chr4:68478369-68566897	protein_coding	11432	10.0924	7.7233	13.5402	13.1516	9.167	9.0041	14.2797	13.6021	9.9043	9.9032	13.1978	10.7813	9.1077	7.9133	13.6273	14.4897	4.9277	6.0436	13.6594	12.8694
ENSG00000033327	GAB2	chr11:77926342-78129394	protein_coding	6771	2.3333	1.9541	1.8324	1.9958	3.5186	3.4727	4.2093	3.9033	3.9395	4.7203	4.7553	3.905	4.185	2.6216	3.5446	3.8685	6.6959	3.181	4.3431	4.2093
ENSG00000033627	ATP6V0A1	chr17:40610861-40674629	protein_coding	10968	3.8765	3.7796	3.1934	3.2982	3.0717	3.0504	2.4076	2.0491	2.2449	2.6681	1.9601	1.7535	3.191	2.2421	2.0357	2.2017	4.1978	3.6512	3.1998	3.1106
ENSG00000033800	PIAS1	chr15:68346516-68483096	protein_coding	4524	7.0593	6.5945	6.7902	6.2508	8.8685	8.681	7.5232	7.8665	10.7409	11.1122	10.0656	6.4486	12.0739	9.3465	8.1391	6.7806	2.9933	3.6583	4.07	4.1594
ENSG00000033867	SLC4A7	chr3:27414213-27525911	protein_coding	9564	23.4755	13.0981	17.7982	20.1941	11.2555	12.1751	16.6755	16.9655	15.2323	14.1365	19.4436	13.6693	11.2081	6.3758	22.5784	22.0649	4.8027	5.7909	11.1771	10.9075
ENSG00000034053	APBA2	chr15:29129628-29410518	protein_coding	6869	3.9389	4.746	4.0319	3.8599	5.9048	6.3092	4.38	4.4331	7.3864	8.342	6.5511	5.5302	6.3105	3.2023	2.3927	3.2305	1.0803	2.5926	2.2878	2.4643
ENSG00000034063	UHRF1	chr19:4903091-4962165	processed_transcript	5144	19.527	13.1054	16.956	12.48	18.4833	16.5459	12.6219	13.3374	26.2538	22.0247	15.3968	21.9747	8.7113	4.7233	4.1452	5.016	1.7901	2.8276	6.321	5.913
ENSG00000034152	MAP2K3	chr17:21187983-21218552	protein_coding	3783	2.631	3.0055	3.1591	3.8522	1.6034	1.9341	2.2013	2.4389	1.9477	2.1392	2.2731	2.1672	0.8903	0.4677	1.0176	0.9431	3.4651	1.8608	3.3016	3.1218
ENSG00000034239	EFCAB1	chr8:49623347-49647870	protein_coding	5805	0	0	0.0098	0.0055	0.982	0.8834	1.3559	1.2284	0.2249	0.169	0.3114	0.1353	0.1892	0.0102	0.0807	0.1574	0.0093	0.0241	0.0455	0.0181
ENSG00000034510	TMSB10	chr2:85132748-85133795	protein_coding	492	620.435	607.699	997.881	1098.53	512.01	592.315	852.729	810.915	842.999	975.757	1312.25	1652.49	568.798	423.118	402.163	530.003	608.826	775.667	2948.96	3129.22
ENSG00000034533	ASTE1	chr3:130732718-130746493	protein_coding	3427	2.3544	1.6589	4.1198	3.0722	1.642	1.4234	2.2105	2.7811	2.15	2.5045	2.9085	3.1499	1.6024	1.1357	2.3442	1.714	0.2687	0.8026	1.7367	1.5239
ENSG00000034677	RNF19A	chr8:101269287-101348446	protein_coding	6031	3.2445	3.1115	4.7624	4.7634	4.7743	4.0751	6.8103	6.6181	4.2991	4.8116	7.1373	7.2502	7.9886	5.9452	8.7917	8.3184	4.4997	5.7202	7.3699	7.1539
ENSG00000034693	PEX3	chr6:143771943-143811147	protein_coding	2222	5.0228	4.2339	8.5876	7.8585	5.953	6.7827	7.9549	7.0575	5.4566	5.6285	7.3663	7.8714	5.3054	4.2996	5.1973	5.3459	4.8267	3.5877	9.6191	8.3858
ENSG00000034713	GABARAPL2	chr16:75600248-75611779	protein_coding	3034	6.4813	5.4388	10.6137	9.2783	6.07	6.4927	12.059	11.1282	9.4988	7.463	10.387	9.9532	12.0425	11.8373	15.5675	16.9226	16.9963	12.5692	24.2265	21.7633
ENSG00000034971	MYOC	chr1:171604556-171621823	protein_coding	2095	0	0	0	0	0	0	0.0128	0.0323	0	0	0	0	0.035	0	0.032	0	0.0259	0	0	0
ENSG00000035115	SH3YL1	chr2:217729-266398	protein_coding	11165	1.2549	1.6988	1.8904	2.1159	1.1127	1.109	1.2559	1.4106	2.907	2.848	3.6278	1.6553	2.774	1.4578	3.6067	3.9205	0.8539	1.3195	1.8434	1.7488
ENSG00000035141	FAM136A	chr2:70523106-70529222	protein_coding	3086	22.7797	17.5251	40.8243	34.158	11.9828	10.0512	16.1908	16.1098	9.5503	7.4432	10.497	15.8185	4.2945	5.9049	7.6688	7.7829	4.2652	5.6953	10.5173	11.217
ENSG00000035403	VCL	chr10:75757871-75879918	protein_coding	5818	86.6066	70.3188	67.9431	80.2959	29.6694	27.4093	26.3318	24.4849	35.7644	36.6843	33.533	40.138	33.9547	42.0351	34.4923	31.5451	54.2972	50.3136	74.5277	75.2991
ENSG00000035499	DEPDC1B	chr5:59892738-59996017	protein_coding	3806	17.0994	12.2402	24.9178	21.4721	12.9226	12.5533	18.7249	17.3956	6.0773	4.3384	5.9694	5.493	2.3086	0.8057	0.6684	1.1318	0.0285	0.2082	0.8705	0.593
ENSG00000035664	DAPK2	chr15:64199234-64364232	protein_coding	7041	0.4872	0.6359	0.555	0.6975	0.2595	0.2132	0.1946	0.1632	0.3444	0.3831	0.347	0.3299	0.3744	0.4355	0.2662	0.3955	0.3385	0.0397	0.8037	0.8946
ENSG00000035681	NSMAF	chr8:59496062-59572403	protein_coding	6165	5.5407	4.7004	7.7032	7.1538	5.2514	4.7777	7.0675	6.0248	6.4749	6.7224	6.681	7.0483	3.9668	4.2472	3.0623	3.9594	2.4513	4.2271	5.2789	5.0743
ENSG00000035687	ADSS	chr1:244571795-244615436	protein_coding	3666	24.5924	18.2381	35.1668	32.5888	14.8115	13.2374	22.1585	22.6971	10.5071	7.648	11.6217	11.0794	4.8933	2.3004	3.0589	3.3589	3.9007	3.6879	9.997	9.4639
ENSG00000035720	STAP1	chr4:68424445-68473055	protein_coding	1655	0	0	0	0	0	0	0	0	0	0	0	0.0206	0.0442	0.1069	0.0405	0.0263	0	0	0	0
ENSG00000035862	TIMP2	chr17:76849058-76921469	protein_coding	5633	4.8718	4.3138	4.4913	4.2908	2.3482	2.5534	2.2127	1.9679	14.9014	14.6855	13.5571	14.1725	9.4889	2.8057	5.0808	4.9127	28.9922	20.8145	40.6659	41.4694
ENSG00000035928	RFC1	chr4:39289075-39367995	protein_coding	6713	20.4617	20.8042	30.4472	31.1565	23.5256	21.6869	28.0392	27.423	18.3393	16.3533	20.6413	21.0674	10.3292	7.2914	10.5812	10.8113	4.793	5.0071	12.1068	10.9346
ENSG00000036054	TBC1D23	chr3:99979843-100044095	protein_coding	5168	5.9365	5.3054	11.0492	9.95	4.9635	4.9129	7.4122	6.6442	6.4427	6.1054	10.4658	8.2956	6.6165	6.6641	12.896	12.7048	5.3769	5.7733	14.6029	13.0661
ENSG00000036257	CUL3	chr2:225334866-225450110	protein_coding	11501	8.5993	6.8283	12.4248	10.4827	7.8793	8.4335	11.4262	10.5172	9.8935	8.9127	11.6063	11.5067	7.7862	7.7068	11.9972	11.8264	5.2749	6.2019	9.7841	9.0842
ENSG00000036448	MYOM2	chr8:1993154-2113475	protein_coding	7062	0.0479	0.0214	0.0565	0.0227	0.683	0.6553	0.3728	0.3015	0.5019	0.6598	0.7818	1.1271	4.5309	8.2589	9.6033	7.0362	15.5551	28.525	4.0811	3.9726
ENSG00000036473	OTC	chrX:38211797-38280703	protein_coding	1585	0	0	0	0	0	0	0.0508	0	0.0588	0	0	0	0.0462	0	0	0.0549	0	0	0	0
ENSG00000036530	CYP46A1	chr14:100150640-100193638	protein_coding	9354	0.2738	0.2958	0.1769	0.2128	0.0938	0.0936	0.0488	0.0542	0.2991	0.3059	0.2925	0.1643	0.6419	0.3972	0.1825	0.2512	0.5617	0.2542	0.2163	0.1711
ENSG00000036549	ZZZ3	chr1:78028100-78149104	protein_coding	9008	9.692	8.6734	14.4354	14.4493	10.0275	10.5315	14.3081	13.9457	10.8507	10.3085	13.3322	12.7951	8.6323	8.5697	13.6304	14.2251	3.4456	4.5543	8.6154	8.14
ENSG00000036565	SLC18A1	chr8:20002365-20040717	protein_coding	3910	0	0	0	0.0164	0	0	0	0	0	0	0	0.0874	0.8052	0.0151	0	0.0223	0	0.0119	0	0
ENSG00000036672	USP2	chr11:119225924-119252436	protein_coding	4538	1.597	1.5742	1.1439	1.0044	0.4187	0.4961	0.3019	0.2234	2.0347	1.5491	1.7442	2.3938	3.227	3.8986	4.0496	2.7518	2.8528	1.3252	1.4278	1.6251
ENSG00000036828	CASR	chr3:121902529-122005342	protein_coding	5390	0.009	0.0187	0	0.006	0	0	0	0	0	0	0.0181	0	0.1766	0.0109	0.0124	0.0161	0	0	0	0
ENSG00000037042	TUBG2	chr17:40811322-40819024	protein_coding	2772	4.3051	4.1561	3.1589	3.1612	4.6137	4.0157	4.3415	3.6211	3.0954	4.0694	3.913	2.4031	5.864	2.5529	3.9125	4.1282	2.2667	1.9845	3.4481	2.8592
ENSG00000037241	RPL26L1	chr5:172385731-172396774	protein_coding	1164	13.0334	9.0764	18.1083	17.1247	10.2966	12.3031	16.1777	16.8113	14.1021	14.1855	15.7827	21.9228	16.4809	28.2198	22.546	22.9143	7.5852	9.5322	20.3522	21.6445
ENSG00000037280	FLT4	chr5:180028505-180076624	protein_coding	8849	1.152	1.2167	0.9895	0.8162	0.8011	0.8127	0.5829	0.508	0.3057	0.2771	0.1436	0.3899	0.1655	0.0067	0.0113	0.0049	0.0306	0	0.0133	0.0059
ENSG00000037474	NSUN2	chr5:6599351-6633404	protein_coding	5506	18.8135	12.9291	18.3381	16.9295	8.7469	8.7342	9.5918	10.2814	12.23	9.8429	9.7435	11.6082	8.8168	9.9823	9.0342	8.3371	5.578	6.9091	11.1931	10.0905
ENSG00000037637	FBXO42	chr1:16573333-16678949	protein_coding	8984	3.8344	2.9119	3.8955	3.2227	3.6117	4.0582	3.9887	3.2992	4.6405	4.9952	5.2481	4.4602	3.7164	4.142	3.1372	3.6857	2.1766	2.4597	2.9926	3.1783
ENSG00000037749	MFAP3	chr5:153418465-153600038	protein_coding	7213	5.7873	4.7289	8.7628	8.0502	7.2949	7.4648	9.9846	10.2332	6.5298	6.097	7.5392	9.5715	5.6441	6.1973	6.8127	6.8346	5.6022	7.3746	9.8896	9.7291
ENSG00000037757	MRI1	chr19:13875345-13885096	protein_coding	3456	3.2713	3.814	3.5818	3.4458	4.1869	5.3742	5.5886	6.1706	4.5878	5.1799	6.0367	4.3689	4.4068	2.4401	5.1528	5.5144	1.7084	1.5513	3.334	3.5387
ENSG00000037897	METTL1	chr12:58162253-58166576	protein_coding	2621	4.2213	2.4953	4.6576	3.7965	4.043	2.8393	3.003	3.1979	2.8823	2.8381	2.1997	4.1316	1.4806	2.025	1.8135	1.5937	1.55	1.8854	2.64	2.333
ENSG00000037965	HOXC8	chr12:54402831-54407570	protein_coding	3371	0	0.0149	0	0	2.4714	1.8551	1.1634	1.2332	0.913	0.9699	1.3045	0.8715	1.6291	0.3674	0.2582	0.0774	0.6427	1.9085	1.5916	1.7205
ENSG00000038002	AGA	chr4:178351923-178363657	protein_coding	2675	2.7634	2.1628	4.1371	3.9358	2.732	2.8521	3.9667	4.1061	1.4992	1.1306	1.3882	1.4558	1.0401	0.6173	0.6757	0.6506	0.8505	0.9934	4.7568	4.5522
ENSG00000038210	PI4K2B	chr4:25162262-25280714	protein_coding	7332	3.4991	2.8407	5.0144	4.8945	1.9636	2.0214	2.3045	2.1987	4.0197	3.0436	3.6784	4.347	1.6478	0.8285	1.4518	1.448	1.4849	0.9792	3.9308	3.5615
ENSG00000038219	BOD1L1	chr4:13570361-13629347	protein_coding	15860	8.3439	8.9643	10.7436	11.4429	6.9625	7.2276	8.3518	8.1935	11.0732	10.0606	11.8421	9.3953	10.0967	6.284	13.0624	11.0725	4.7575	7.1575	8.5203	8.1561
ENSG00000038274	MAT2B	chr5:162930119-162946342	protein_coding	5153	7.5665	6.4827	13.2677	12.0221	7.7293	7.4878	11.5729	12.6713	8.742	7.1384	10.9229	10.5605	5.0301	4.1429	7.0482	7.4052	2.7646	3.7545	8.0396	7.8635
ENSG00000038295	TLL1	chr4:166794409-167025047	protein_coding	7522	0.0257	0.0201	0.1138	0.0683	0	0	0	0	0.2356	0.1521	0.1169	0.0908	0.7885	0.0314	0.1202	0.1273	0.0144	0.3161	0.0702	0.0558
ENSG00000038358	EDC4	chr16:67906925-67918406	protein_coding	6173	7.0285	7.0986	6.4918	7.1758	7.1388	7.0509	6.8147	6.4768	6.5421	8.104	7.0048	9.225	7.4727	9.8973	8.1556	8.8742	4.44	4.9089	7.2811	7.0658
ENSG00000038382	TRIO	chr5:14143810-14532235	protein_coding	17500	10.298	8.9119	7.9912	8.5914	10.1269	10.7527	9.2623	8.7582	20.0603	21.3651	19.1863	15.6964	15.0458	15.2083	14.3134	16.9246	12.22	15.6509	16.8493	17.4365
ENSG00000038427	VCAN	chr5:82767283-82878122	protein_coding	14831	46.9468	52.2971	50.4485	54.8668	52.3504	47.2258	34.4139	32.2426	46.7244	60.1314	50.1013	56.973	43.5491	3.2526	1.6837	2.9895	24.1305	37.3969	172.31	165.034
ENSG00000038532	CLEC16A	chr16:11038344-11276046	protein_coding	11944	1.97	1.7522	1.323	1.5076	1.8723	1.7854	1.228	1.3441	2.8736	3.5382	2.4135	2.1565	4.5793	4.5178	4.6719	4.2076	1.7233	2.4668	2.0227	2.0874
ENSG00000038945	MSR1	chr8:15965386-16424999	protein_coding	7812	0	0	0.011	0.0082	0.0094	0.016	0.0034	0.013	0.1791	0.0523	0.0688	0.0306	0.0094	0.0075	0.0171	0.039	0.1733	0.0239	0.1051	0.1075
ENSG00000039068	CDH1	chr16:68771127-68869451	protein_coding	6154	28.7974	43.9082	44.6284	51.0113	0.0475	0.1423	0.2008	0.1318	0.0455	0.0266	0.1112	0.7161	0.7496	0.23	0.3155	0.4454	0.2993	1.2197	0.2096	0.2004
ENSG00000039123	SKIV2L2	chr5:54603587-54721409	protein_coding	6578	22.3947	16.2752	34.168	33.416	20.7421	19.8789	33.4049	31.3563	19.0843	16.3907	23.4492	22.689	11.209	13.394	18.1058	18.3159	5.6324	8.7102	15.0251	13.5169
ENSG00000039139	DNAH5	chr5:13690439-13944652	protein_coding	16475	0.3021	0.171	0.2251	0.2396	0.0355	0.0342	0.0424	0.0164	0.0679	0.0347	0.0119	0.0249	0.04	0.0107	0.0183	0.0026	0.1348	0.232	0.1121	0.1274
ENSG00000039319	ZFYVE16	chr5:79703831-79775169	protein_coding	11461	6.9009	4.8593	7.7223	7.5786	12.8868	13.4556	17.8624	16.8379	10.8801	10.6769	13.7826	10.6885	10.4902	8.7577	14.3902	16.1691	2.5569	4.2182	6.0475	5.8574
ENSG00000039523	FAM65A	chr16:67552320-67580691	protein_coding	6730	1.3784	1.2484	0.2543	0.5056	2.3781	2.2115	0.918	0.8035	2.2728	2.417	0.8059	0.5888	2.6438	2.2432	1.1738	1.6163	2.1651	1.7733	0.6796	0.7877
ENSG00000039537	C6	chr5:41142335-41261540	protein_coding	4739	0	0	0	0	0	0	0	0	0	0	0	0	0.0155	0	0	0	0	0.0098	0.0124	0
ENSG00000039560	RAI14	chr5:34656341-34832732	protein_coding	7702	14.4719	14.7296	16.6387	18.5373	7.42	6.7879	8.2311	8.2232	10.7531	10.8785	11.5836	12.0818	9.25	5.7809	3.5334	5.6945	13.0037	9.3397	30.9256	29.2152
ENSG00000039600	SOX30	chr5:157052686-157098488	protein_coding	3471	0	0	0.0082	0.0092	0.0421	0	0.0077	0	0.0806	0.0707	0.0704	0.0787	0.2953	0.068	0.1639	0.2758	0.0468	0.094	0.0084	0.0076
ENSG00000039650	PNKP	chr19:50364460-50371166	protein_coding	3531	9.2635	8.9619	8.1747	8.8541	7.1404	6.4467	7.2045	7.3317	6.4713	5.7875	5.1751	6.0853	3.1727	2.0376	2.5027	2.8095	1.8562	2.6802	3.1304	3.5601
ENSG00000039987	BEST2	chr19:12862515-12869272	protein_coding	2646	0.1826	0.6084	0.3018	0.3397	0	0	0	0.0511	0	0.0309	0	0.0129	0.0277	0.0223	0	0.0329	0	0	0.0111	0
ENSG00000040199	PHLPP2	chr16:71671737-71758604	protein_coding	12493	3.1906	2.678	2.7032	2.8776	2.0474	1.9322	1.8814	2.1913	3.6432	3.579	3.7545	3.4153	4.3019	4.1776	6.2082	5.8303	1.0579	1.6121	2.6965	2.3864
ENSG00000040275	SPDL1	chr5:169010637-169031782	protein_coding	4777	10.903	6.993	15.6435	14.1645	8.1541	8.2343	11.0386	9.7704	9.7815	7.2896	8.4381	9.8542	2.9889	2.5554	1.906	2.7781	1.8256	0.9857	6.2481	5.6916
ENSG00000040341	STAU2	chr8:74332603-74659943	protein_coding	8998	7.5603	6.5193	10.4415	10.6769	5.5472	5.6087	6.9202	6.7421	6.5197	6.3501	8.1179	6.8527	5.623	5.4922	7.2059	8.5542	3.8347	5.6526	5.9401	5.9354
ENSG00000040487	PQLC2	chr1:19638819-19655794	protein_coding	2686	3.7055	3.3714	2.7397	2.8083	3.2378	2.7706	2.1102	2.8185	3.5765	4.6258	3.5471	3.4212	3.5983	4.8083	2.3305	2.6081	3.1056	2.239	3.2528	3.1461
ENSG00000040531	CTNS	chr17:3539761-3564836	protein_coding	3398	2.6873	2.1024	2.6441	2.371	2.7959	2.8526	2.3242	2.3771	2.2781	2.3094	1.6536	2.3223	2.4996	1.8223	1.6156	1.6774	2.1361	1.9894	1.95	2.5796
ENSG00000040608	RTN4R	chr22:20228937-20270769	protein_coding	3339	4.1963	3.9627	0.7944	0.8556	0.8974	1.105	0.3942	0.4757	2.3463	2.3502	0.878	1.0333	1.864	0.4592	0.4912	0.3127	0.2596	0.5585	0.0351	0.0393
ENSG00000040633	PHF23	chr17:7138346-7143041	protein_coding	2783	14.3747	12.7988	22.2092	19.9996	10.9503	9.3479	13.1273	13.7106	13.5727	13.6874	15.0633	14.1651	11.3133	10.4257	10.8733	9.6465	7.6881	8.3925	16.9615	17.2665
ENSG00000040731	CDH10	chr5:24487208-24645087	protein_coding	3660	0.6468	0.1924	0.7014	0.4122	0.7787	0.9568	1.4459	2.4009	0.3058	0.1563	0.2403	0.4293	1.5604	0.0645	0.064	0.0832	0.7844	0.0892	0.2644	0.2725
ENSG00000040933	INPP4A	chr2:99061316-99210853	protein_coding	13202	5.1894	4.9844	5.8181	5.8765	3.659	4.0974	4.1977	4.055	4.9876	4.7923	5.6883	4.0133	3.6937	2.2469	3.2683	3.2002	2.6628	2.1223	2.7494	2.616
ENSG00000041353	RAB27B	chr18:52385090-52562747	protein_coding	7432	0.0975	0.0812	0.142	0.19	0.3835	0.244	0.2819	0.3411	0.0125	0.055	0.1183	0.2114	0.2759	0.6586	0.0991	0.1522	0.43	1.3361	3.6412	3.3123
ENSG00000041357	PSMA4	chr15:78832746-78841604	protein_coding	3839	32.533	23.0906	62.6172	54.5064	24.2714	21.8934	42.2639	41.5967	22.6181	18.9504	29.2596	39.1439	12.9504	18.7103	17.6045	21.5912	11.0337	14.451	40.3091	38.8498
ENSG00000041515	MYO16	chr13:109248499-109860355	protein_coding	8994	0.0107	0.0056	0.0095	0.0107	0.7719	0.8274	0.8184	0.7553	0.3941	0.7998	0.7931	0.4786	4.2985	6.0586	4.5257	6.5165	0	0.2333	0.0065	0.0117
ENSG00000041802	LSG1	chr3:194361516-194393206	protein_coding	4818	16.9373	13.1882	19.8911	18.914	8.6004	7.8917	10.1809	10.2484	10.9179	9.9082	8.488	13.9252	7.1579	9.0332	8.3581	7.6582	6.0373	6.0089	9.9374	9.2546
ENSG00000041880	PARP3	chr3:51976360-51982883	protein_coding	2928	0.7755	0.7045	0.867	0.7893	0.599	0.8543	0.7982	0.6926	1.8793	1.7588	1.8022	1.6334	1.8005	1.4904	1.5777	1.6198	1.0915	0.8439	2.9439	2.7606
ENSG00000041982	TNC	chr9:117782805-117880536	protein_coding	8687	14.0212	13.5285	11.0813	14.2997	0.1935	0.1584	0.1794	0.1517	58.7384	108.137	95.6375	116.549	81.961	100.187	102.865	115.221	18.7124	9.9282	99.5308	104.214
ENSG00000041988	THAP3	chr1:6684925-6695646	protein_coding	4072	2.4205	2.1745	2.7598	2.956	3.1766	3.2097	4.6245	4.7475	2.5195	3.4728	4.7995	2.8439	3.2187	3.2586	5.4831	6.5608	1.3568	1.4311	2.7793	2.9067
ENSG00000042062	FAM65C	chr20:49202644-49308065	protein_coding	6009	0.6432	0.7703	0.7737	1.0683	0.3405	0.6452	0.7644	1.3161	0	0.068	0.1464	0.0739	0.2193	0	0.0223	0.029	0.027	0.4345	0.1415	0.2184
ENSG00000042088	TDP1	chr14:90421282-90511106	protein_coding	6221	8.1315	7.2702	10.912	9.6022	5.3686	5.75	6.5117	6.6279	8.4406	8.0021	8.6158	7.2868	4.2489	3.6591	3.6536	4.1476	1.071	1.7611	3.8222	3.3791
ENSG00000042286	AIFM2	chr10:71857978-71892690	protein_coding	5131	1.017	0.8432	1.1173	1.4326	0.1282	0.195	0.3089	0.3162	0.509	0.4301	0.6951	0.526	0.4281	0.5517	0.8155	0.6021	1.0346	0.7723	2.3485	2.0868
ENSG00000042304	C2orf83	chr2:228474805-228498036	protein_coding	2087	0	0	0	0	0	0	0	0	0	0	0	0	0	0	0	0.0208	0	0	0	0
ENSG00000042317	SPATA7	chr14:88851267-88936694	protein_coding	6872	1.3147	1.2226	1.9798	1.7329	2.7118	2.8665	3.3618	3.723	2.3479	2.1768	3.2279	2.053	2.1736	1.416	1.963	2.4314	0.6306	1.0922	1.3567	1.1686
ENSG00000042429	MED17	chr11:93517392-93547861	protein_coding	10773	3.0093	2.0921	3.8019	3.3013	3.6632	3.8777	4.1767	4.7779	5.636	4.932	5.4424	6.8429	3.5682	3.1805	4.6546	4.2247	1.0257	1.6531	2.9365	2.6724
ENSG00000042445	RETSAT	chr2:85569210-85581743	protein_coding	4264	2.5155	2.6901	4.3747	4.0575	3.8391	4.1358	7.4906	7.0383	2.1436	3.1248	3.3001	4.1659	2.3697	1.2171	2.3944	2.4286	4.5478	2.3944	6.9241	6.6841
ENSG00000042493	CAPG	chr2:85621870-85645555	protein_coding	2607	7.2278	9.3787	11.8598	16.4494	4.3731	4.7256	9.3664	10.9415	2.2181	2.2262	2.1365	2.2407	0.646	0.1357	0.3338	0.2504	0.374	2.2353	9.5144	7.7413
ENSG00000042753	AP2S1	chr19:47341392-47354249	protein_coding	1704	27.5883	23.9737	30.3972	25.6185	26.2473	27.3046	29.0225	28.4813	18.9926	17.1256	15.1108	22.2125	9.8401	11.4554	6.5612	8.0179	25.7483	14.7465	36.0124	40.6288
ENSG00000042781	USH2A	chr1:215796235-216596738	protein_coding	20584	0.0023	0.0293	0.0152	0.0187	0.0036	0.0061	0	0	0	0	0	0.0033	0.0142	0	0.0049	0.0042	0.0105	0.0204	0.0043	0.0025
ENSG00000042813	ZPBP	chr7:49890016-50160925	protein_coding	2643	0	0	0	0	0	0	0	0	0	0	0	0	0	0	0	0	0	0	0	0
ENSG00000042832	TG	chr8:133879202-134147147	protein_coding	11132	0	0.0045	0	0.0029	0.0066	0.0056	0.0048	0.0425	0.9719	1.3217	0.8778	0.5063	0.7169	0.7946	1.293	1.4618	0.2433	0.1633	0.2607	0.2452
ENSG00000042980	ADAM28	chr8:24151552-24216531	protein_coding	9351	0.0878	0.0592	0.1129	0.0927	0.0078	0.0067	0.0057	0	2.3539	4.0648	3.2761	1.6147	0.4933	0.2586	0.1503	0.47	0.0058	0.0299	0.0219	0.0365
ENSG00000043039	BARX2	chr11:129245834-129322171	protein_coding	4411	0	0	0	0	0.0166	0.0142	0.0426	0	5.138	4.0399	3.2455	4.4066	0.6972	2.4734	1.0472	0.7694	0	0.0106	0.0133	0.0297
ENSG00000043093	DCUN1D1	chr3:182655861-182703741	protein_coding	8412	7.9721	6.3933	13.2169	13.775	4.561	4.3044	6.5656	6.9225	6.4085	5.8401	9.2003	10.1158	5.1355	4.8723	9.9642	9.3519	4.4624	3.5136	7.6958	6.7794
ENSG00000043143	JADE2	chr5:133860002-133918918	protein_coding	9873	4.3602	4.744	4.7003	4.6231	0.9623	0.8234	0.9414	1.0201	0.3117	0.3146	0.391	0.4775	0.4079	0.0179	0.0339	0.0132	0.192	0.4722	0.6147	0.6034
ENSG00000043355	ZIC2	chr13:100634025-100639018	protein_coding	3301	36.9571	27.677	23.0876	20.4201	0.4428	0.3599	0.4476	0.4095	0.9889	0.3467	0.3996	1.097	5.878	0.0715	0.2231	0.1977	0	0.1412	0.0622	0.0875
ENSG00000043462	LCP2	chr5:169673240-169725231	protein_coding	7231	0.0134	0.0139	0.0118	0.0133	0	0.0259	0.0111	0.014	0	0	0.0068	0	0	0	0	0.006	0	0	0	0
ENSG00000043514	TRIT1	chr1:40306722-40349183	protein_coding	3054	7.7677	7.5942	14.1212	12.0553	9.5239	10.177	16.9937	15.5151	10.933	11.1345	12.9267	10.6822	6.7131	6.604	9.5139	9.161	5.587	3.2362	9.1011	8.705
ENSG00000043591	ADRB1	chr10:115803805-115806667	protein_coding	2862	0.1013	0.0352	0.0498	0.0449	0.0255	0	0.1032	0.0118	0.0326	0	0.0171	0.0597	0.1023	0	0	0	0	0.0163	0	0
ENSG00000044012	GUCA2B	chr1:42619091-42621495	protein_coding	597	0	0	0	0	0	0	0	0	0	0	0	0.0572	0	0	0	0	0	0	0	0
ENSG00000044090	CUL7	chr6:43005354-43021683	protein_coding	5628	5.2625	6.901	6.933	8.5893	13.4527	15.3229	20.8487	18.1354	17.8976	20.0434	23.5702	13.9241	23.0277	17.1952	43.4542	38.3312	8.3156	11.2821	15.7692	15.7053
ENSG00000044115	CTNNA1	chr5:137946655-138270723	protein_coding	8830	40.5342	38.4128	60.5142	61.2162	27.7011	26.3814	40.6866	38.7074	30.7473	31.1047	42.6121	43.8597	29.0311	29.8604	48.8386	41.7864	31.7272	39.3231	64.9339	64.7598
ENSG00000044446	PHKA2	chrX:18910417-19002716	protein_coding	9029	4.5324	4.2737	3.9266	4.7424	3.1971	3.5046	3.9094	3.8704	3.4708	3.4946	3.7393	2.7544	2.668	1.6394	2.4172	2.53	1.2778	0.9914	1.5165	1.6364
ENSG00000044459	CNTLN	chr9:17134979-17503921	protein_coding	11167	4.5083	4.1583	5.609	5.7919	1.8455	1.7136	1.9918	2.167	4.5602	4.004	3.9553	3.6495	2.826	1.2674	0.9203	1.1494	0.5239	1.8035	1.9481	1.913
ENSG00000044524	EPHA3	chr3:89156673-89531284	protein_coding	6674	0.0869	0.2337	0.4573	0.3655	0.5804	0.8058	0.5474	0.2735	9.6145	9.5166	13.3386	15.2377	20.9217	10.2058	17.8755	15.0796	0.1217	1.2923	0.7951	0.6606
ENSG00000044574	HSPA5	chr9:127997131-128003609	protein_coding	3908	57.4266	31.9518	48.0021	53.0266	28.6301	24.4832	41.5727	47.0802	51.1676	35.5374	43.1832	118.829	33.856	43.7166	115.788	87.0444	30.2159	25.4571	119.085	96.521
ENSG00000046604	DSG2	chr18:29078005-29128971	protein_coding	6190	36.4041	34.3794	52.8887	54.4741	80.6721	84.7422	117.163	115.706	1.1752	1.0829	1.6655	1.5673	1.7034	0.181	0.5624	0.5272	0	1.2803	0.2842	0.2586
ENSG00000046647	GEMIN8	chrX:14026397-14048012	protein_coding	2424	5.8401	6.683	10.4606	9.3223	8.11	7.817	12.0129	12.7295	6.1177	7.6549	9.7759	5.2566	4.8028	2.5788	4.8747	6.1569	2.1452	3.1349	5.9872	5.2943
ENSG00000046651	OFD1	chrX:13752831-13787480	protein_coding	5212	7.0637	6.2163	8.8052	8.6035	5.833	6.4312	7.2156	7.8202	9.0546	8.3436	9.6087	8.4353	9.7918	9.5271	13.0248	15.9368	2.8476	4.0877	6.5479	5.8963
ENSG00000046653	GPM6B	chrX:13789149-13956757	protein_coding	5675	20.1859	20.762	35.7499	33.3768	5.6533	4.8817	7.3796	7.0095	17.6343	25.1637	30.5037	45.315	27.6883	19.8377	33.0905	30.5612	1.8421	1.6758	7.2433	7.3067
ENSG00000046774	MAGEC2	chrX:141290130-141293076	protein_coding	1991	0	0	0	0	0	0	0	0	0	0	0	0	0	0.0296	0	0	0	0	0	0
ENSG00000046889	PREX2	chr8:68864352-69149265	protein_coding	12058	7.7373	6.1583	8.0378	7.8157	8.9154	8.1684	8.2785	7.7695	5.2519	3.3218	3.5658	2.1191	3.024	1.1689	1.5796	1.512	0	0.0039	0.0049	0.0044
ENSG00000047056	WDR37	chr10:1095477-1178237	protein_coding	5656	2.1356	2.5083	3.0862	3.2632	2.7909	3.129	4.0133	3.651	3.9411	3.9888	5.5459	4.2339	3.6377	2.6171	4.6104	3.8388	2.9114	2.0524	4.8779	4.4869
ENSG00000047188	YTHDC2	chr5:112849379-112930982	protein_coding	10816	5.8026	4.5258	6.8379	6.8405	4.7635	5.0475	5.5012	5.8307	5.9326	5.6001	5.7686	4.6238	4.5492	3.2932	4.0512	4.3487	1.5825	2.3879	3.73	3.7269
ENSG00000047230	CTPS2	chrX:16606125-16731059	protein_coding	5510	26.5162	22.2329	31.3074	31.3587	19.5368	19.6234	25.8195	25.3138	18.3655	16.4226	18.8787	17.8244	11.4017	7.1495	8.7239	10.6606	1.5336	4.9412	5.667	5.5536
ENSG00000047249	ATP6V1H	chr8:54628116-54756118	protein_coding	5090	5.0308	4.4873	8.2373	7.8197	6.1164	6.0325	9.679	9.6942	3.8662	3.7258	3.974	5.6442	3.6251	3.7191	4.5246	4.9666	6.1829	4.5887	8.7439	8.6414
ENSG00000047315	POLR2B	chr4:57843887-57897334	protein_coding	5901	28.4437	21.2968	41.1621	38.2669	25.5987	27.5961	41.0475	41.1792	28.1016	25.8484	32.4735	44.7662	18.5874	23.4952	26.82	28.3732	16.0178	18.9054	35.7137	34.3604
ENSG00000047346	FAM214A	chr15:52873513-53002014	protein_coding	7755	0.6666	0.785	0.7613	0.8195	0.4052	0.5645	0.4087	0.4314	1.5995	1.9289	1.7389	1.3391	2.0111	1.3916	2.6417	2.3789	3.7997	2.1341	2.7448	2.511
ENSG00000047365	ARAP2	chr4:35949842-36246131	protein_coding	12428	0.4237	0.1943	0.4498	0.3383	0	0	0.0022	0.0245	0.015	0.0526	0.0944	0.0825	0.3181	0.0807	0.0727	0.0385	0	0.135	0.0731	0.0908
ENSG00000047410	TPR	chr1:186280783-186344825	protein_coding	12350	31.4928	27.5092	41.8253	40.9821	28.392	27.2476	33.2816	33.077	27.7458	25.8266	29.2641	31.4445	20.2586	15.4571	17.1462	18.2042	9.2676	13.7669	19.505	18.5089
ENSG00000047457	CP	chr3:148880196-148939842	protein_coding	7296	0.0861	0.0759	0.1329	0.1936	0	0	0.011	0	0	0	0.0201	0.0234	0.2409	0.0162	0.0092	0.006	0.0223	0.0767	0.0522	0.0576
ENSG00000047578	KIAA0556	chr16:27561453-27791690	protein_coding	9692	2.0339	2.0504	2.0247	2.209	2.6919	2.0841	2.0676	2.3712	3.012	2.9856	2.7676	2.4954	2.1304	2.0019	1.9168	2.0651	1.0172	1.1159	1.7425	1.6355
ENSG00000047579	DTNBP1	chr6:15523031-15663289	protein_coding	3078	0.6436	1.0951	0.8711	1.7415	0.9022	0.8736	0.864	1.1639	0.8181	0.7436	1.1112	1.1098	1.0705	0.9388	1.5443	1.1168	0.5455	0.8179	0.924	1.0317
ENSG00000047597	XK	chrX:37545011-37591383	protein_coding	5206	0.464	0.5508	0.6958	0.6906	0.0562	0.0601	0.0671	0.039	0.0537	0.0314	0.1126	0.0787	0.0703	0.2152	0.1029	0.0334	0.104	0.0895	0.0394	0.0756
ENSG00000047617	ANO2	chr12:5641034-6055398	protein_coding	6012	0.5063	0.6695	0.8018	0.6674	0.0486	0.0208	0.0223	0	0.2172	0.3943	0.3332	0.5284	0.2314	0.0785	0.0891	0.123	1.0541	1.6362	1.8629	1.8814
ENSG00000047621	C12orf4	chr12:4596893-4647674	protein_coding	4939	2.8271	2.5058	3.8808	3.8864	4.8237	3.9758	4.536	4.6737	5.3252	5.0313	4.8968	6.2595	4.744	4.8239	2.894	3.3124	3.3231	4.6535	6.7317	6.2541
ENSG00000047634	SCML1	chrX:17755587-17773105	protein_coding	5475	0.2736	0.2573	0.4897	0.4397	3.9243	4.0663	5.3971	4.963	4.6165	4.3745	6.6574	4.7232	2.755	1.4757	4.7139	3.3219	0.8409	1.439	3.2452	2.9959
ENSG00000047644	WWC3	chrX:9983601-10112518	protein_coding	7114	10.1873	8.6065	7.0123	7.3726	5.0337	5.1777	3.7156	4.0001	9.6098	9.8587	7.1222	5.4838	7.215	4.9407	5.8535	5.7615	1.066	1.848	3.2311	3.4862
ENSG00000047648	ARHGAP6	chrX:11136238-11683821	protein_coding	8357	0.1619	0.0903	0.1058	0.0999	0.5946	0.5687	0.3889	0.3478	0.9151	0.8803	0.8711	0.7399	1.3318	1.242	0.8171	0.9944	0.7972	2.4601	1.3262	1.3535
ENSG00000047662	FAM184B	chr4:17630928-17783135	protein_coding	6622	0.0438	0.0912	0.1034	0.0921	0	0.0189	0	0.0306	0.0704	0.0247	0.059	0.1393	0.3207	0.1781	0.0657	0.0657	0.5644	2.2951	0.0974	0.0832
ENSG00000047849	MAP4	chr3:47892181-48130769	protein_coding	14901	13.8321	13.2889	9.2969	11.587	16.0963	15.5449	12.8752	12.3679	15.6039	19.5181	16.1684	16.3365	24.8491	32.2271	25.1981	25.2406	29.5135	26.0301	25.4706	25.7966
ENSG00000047932	GOPC	chr6:117639373-117923691	protein_coding	5025	8.5092	8.2397	14.1733	14.1489	12.1147	11.0761	17.4702	18.341	21.2517	21.0009	26.1847	18.8785	19.0155	17.7916	32.4414	39.3981	5.1957	7.487	20.7306	18.107
ENSG00000047936	ROS1	chr6:117609462-117747018	protein_coding	7856	0	0	0.0073	0	0	0	0	0	0	0.0104	0.0187	0.0174	0.0093	0.0225	0.0043	0.0665	0.262	0	0.0858	0.0401
ENSG00000048028	USP28	chr11:113668595-113746292	protein_coding	5719	20.8838	27.455	31.47	36.5886	9.8523	10.3553	12.2078	11.0154	13.3238	13.7357	16.9585	11.0624	10.9978	11.0129	15.8034	18.0237	3.817	7.6218	6.7877	6.452
ENSG00000048052	HDAC9	chr7:18126571-19042039	protein_coding	16827	0.9274	0.9747	1.573	1.3773	0.0217	0.0223	0.0255	0.006	0.3104	0.4032	0.7288	0.7735	3.4419	3.5537	7.6568	5.9499	3.9111	3.2055	3.3227	3.3314
ENSG00000048140	TSPAN17	chr5:176074387-176086058	protein_coding	5218	9.1297	8.0892	13.4796	12.6721	2.2829	2.0734	3.1403	2.8304	5.1298	5.2009	5.3747	8.9297	3.7747	3.4018	4.0607	4.2444	6.353	5.8073	11.3557	10.9693
ENSG00000048162	NOP16	chr5:175810948-175815976	protein_coding	2852	7.6064	5.6272	14.4913	13.2693	5.1249	5.5914	11.736	11.7198	4.8399	4.7578	6.5957	9.187	2.1052	3.9701	4.1079	3.8599	2.7349	3.0731	8.2447	8.0885
ENSG00000048342	CC2D2A	chr4:15471488-15603180	protein_coding	7570	2.2147	2.3128	3.1085	3.0826	3.0507	2.7922	2.9702	3.2547	4.8789	4.3517	3.5563	4.5081	2.2537	1.114	0.4864	0.5575	1.288	2.4264	3.1953	2.9364
ENSG00000048392	RRM2B	chr8:103216729-103251346	protein_coding	5548	10.1106	7.5718	15.8704	17.7502	5.7695	6.2784	11.882	12.5733	5.1945	3.2561	6.8163	8.768	5.0547	5.1341	20.8458	13.6776	12.8387	15.2682	31.2745	29.5836
ENSG00000048405	ZNF800	chr7:126986843-127071978	protein_coding	5793	1.2677	0.7729	1.4475	1.2412	3.1538	2.9795	2.6756	2.917	6.2789	5.489	5.6256	5.6433	5.435	5.3954	7.6216	6.7674	3.0763	3.2029	3.9578	3.8054
ENSG00000048462	TNFRSF17	chr16:12058963-12061925	protein_coding	1118	0	0	0	0	0	0.0559	0	0	0	0	0	0.0306	0.0655	0	0.0299	0	0	0	0	0
ENSG00000048471	SNX29	chr16:12070593-12668146	protein_coding	11298	1.0306	1.0153	0.9619	0.9461	1.753	1.8487	1.5907	1.5256	2.5839	2.8506	2.2574	2.3131	2.7284	2.9909	2.2073	3.0309	1.2657	1.5845	1.6297	1.5052
ENSG00000048540	LMO3	chr12:16701306-16763528	protein_coding	10268	0.0941	0.0637	0.0917	0.0594	0.0783	0.0853	0.1517	0.2139	2.4343	1.2021	1.2895	0.8184	1.3192	0.3848	0.4694	0.411	0.0106	0.0409	0.0029	0.0128
ENSG00000048544	MRPS10	chr6:42174538-42185603	protein_coding	2110	15.6852	11.6355	25.0349	23.2448	14.3737	11.9145	18.7148	19.2049	17.1504	16.271	21.9519	25.8392	11.3474	16.6018	16.8956	19.714	20.4345	15.5988	31.6397	29.3907
ENSG00000048545	GUCA1A	chr6:42123143-42147794	protein_coding	2317	2.69	2.2364	3.9146	4.1838	0.2208	0.3779	0.7536	0.6564	0.1208	0.247	0.1054	0.1327	0.5056	0	0.1734	0.3192	0.0234	0.0402	0.0127	0.0906
ENSG00000048649	RSF1	chr11:77371040-77532063	protein_coding	15740	7.4406	6.5939	8.7525	9.2258	6.3934	6.198	7.4752	7.178	9.0422	7.9094	10.3058	8.3514	6.9359	5.0281	7.9283	7.2647	2.3745	2.953	5.441	5.0537
ENSG00000048707	VPS13D	chr1:12290123-12572099	protein_coding	20346	5.7182	5.1259	4.5701	4.9743	3.6278	3.756	3.4777	3.4069	5.322	5.8135	4.4714	3.6031	4.664	3.4144	3.8778	3.3746	2.7794	3.3774	3.8764	3.7329
ENSG00000048740	CELF2	chr10:11047258-11378674	protein_coding	9873	5.3537	5.0396	6.425	5.4001	0.6144	0.7284	0.8026	0.8763	27.9053	28.8785	21.5569	15.6843	20.2166	25.9414	27.6729	26.7289	8.6959	8.5278	11.0708	10.9356
ENSG00000048828	FAM120A	chr9:96214003-96328397	protein_coding	7296	11.4828	11.3017	11.1924	11.3902	12.1501	11.1084	12.533	13.3686	13.4096	16.0101	14.3377	14.6831	9.7848	10.5563	9.8229	11.0388	8.7902	11.3226	17.34	16.5463
ENSG00000048991	R3HDM1	chr2:136289024-136482840	protein_coding	7898	8.8885	7.096	4.0519	5.5638	8.9014	8.401	4.9658	4.7841	7.2034	7.4725	4.3428	3.3477	5.9518	4.4502	3.077	3.5148	2.2632	4.4388	1.9378	2.11
ENSG00000049089	COL9A2	chr1:40766158-40783488	protein_coding	4151	1.9089	1.8907	1.5185	1.3919	18.3098	20.7299	18.5988	19.7602	6.2013	5.1594	3.331	1.3003	10.2308	0.5967	1.4515	1.6038	0.8612	0.1685	0.5156	0.4805
ENSG00000049130	KITLG	chr12:88886569-88974628	protein_coding	6030	2.1313	1.8438	3.9118	4.0296	1.018	0.9334	1.6661	2.2587	0.4331	0.3253	0.6644	2.4077	1.275	0.0782	0.3664	0.166	1.563	5.1645	6.6078	6.6023
ENSG00000049167	ERCC8	chr5:60169657-60240900	protein_coding	4847	3.2894	2.927	5.0607	5.0065	4.7494	3.8964	5.8691	6.2754	4.1948	3.6765	4.5563	5.307	2.4774	2.7132	2.6519	3.1509	0.9499	1.5485	3.0668	2.9671
ENSG00000049192	ADAMTS6	chr5:64444562-64777747	protein_coding	8567	0.3271	0.2701	0.3562	0.3784	3.3184	3.7301	4.1578	4.2527	1.0234	0.8206	1.2205	0.6898	1.1111	0.1377	0.1407	0.2895	1.9031	0.8108	4.5038	4.5828
ENSG00000049239	H6PD	chr1:9294833-9331396	protein_coding	9321	3.9187	3.9563	2.5949	3.2853	6.8682	6.736	6.6199	6.6643	10.6965	11.006	11.0393	6.2377	8.531	3.8088	4.5393	4.6307	4.3178	5.6868	9.6787	9.8714
ENSG00000049245	VAMP3	chr1:7831328-7841492	protein_coding	2760	12.4814	10.6816	18.5293	18.6427	24.1219	23.3378	34.2987	34.2498	13.6182	13.6237	17.7203	20.7811	13.0523	13.9526	23.6622	20.5574	24.0611	21.8065	52.0947	48.3421
ENSG00000049246	PER3	chr1:7844379-7905237	protein_coding	8059	1.9424	1.8853	1.5077	1.9955	0.7436	0.613	0.6233	0.4152	1.0531	0.9839	0.8427	0.8647	1.49	0.4391	1.0301	0.9988	0.5982	0.5727	0.5457	0.6318
ENSG00000049247	UTS2	chr1:7903142-7913572	protein_coding	1783	0	0	0	0.018	0.082	0	0.0753	0.0569	0.0523	0	0	0	0.0411	0	0	0	0	0	0	0
ENSG00000049249	TNFRSF9	chr1:7979906-8000926	protein_coding	2284	0.0635	0	0	0.0141	0.032	0.0274	0.0235	0.0148	0	0	0	0.015	0	0	0	0	0.0237	0.4899	0.1284	0.0345
ENSG00000049283	EPN3	chr17:48609903-48621111	protein_coding	4642	0.458	0.4985	0.3441	0.2835	0	0.0269	0.0116	0.0291	0.0402	0.0176	0.0421	0.0809	0.1262	0	0.0288	0.0094	0	0.0301	0	0.0057
ENSG00000049319	SRD5A2	chr2:31747549-31806136	processed_transcript	4647	0.0104	0	0.0123	0	0	0	0	0	0	0	0	0	0	0.0127	0.0144	0.0655	0.0117	0.0201	0	0
ENSG00000049323	LTBP1	chr2:33172038-33624576	protein_coding	7329	5.61	7.2694	8.3439	9.3593	11.1481	11.084	10.2957	8.7432	7.7372	9.3911	16.6331	10.9861	12.2284	3.6612	6.4993	5.1888	10.6722	7.6268	36.28	35.4467
ENSG00000049449	RCN1	chr11:31833938-32127301	protein_coding	7225	15.3605	14.9709	26.4065	26.3186	24.7311	22.7208	31.6888	33.1652	26.9924	27.7867	42.9488	45.5083	24.1602	27.8989	36.4484	35.8567	14.6419	14.1182	50.1085	47.4062
ENSG00000049540	ELN	chr7:73442118-73484237	protein_coding	6542	0.2511	0.4768	0.3401	0.4023	0.6814	0.7456	1.0717	1.5705	0.6558	1.5369	2.0613	4.3706	3.4249	0.0631	0.0665	0.2527	0.6375	0.1354	1.5283	1.2877
ENSG00000049541	RFC2	chr7:73645828-73668774	protein_coding	2197	21.8594	18.4338	31.3397	26.6635	21.4884	18.815	24.6497	24.0131	15.9618	12.5013	15.5896	23.6187	5.699	5.959	5.1041	5.3671	1.8491	1.9946	4.9644	4.6467
ENSG00000049618	ARID1B	chr6:157099062-157531913	protein_coding	16334	7.0547	6.4804	4.8876	5.2705	5.7403	5.9228	3.6477	3.6644	6.8691	7.1313	4.4031	3.7478	6.1816	4.1881	3.3322	3.5216	3.2764	2.9883	1.9906	2.1305
ENSG00000049656	CLPTM1L	chr5:1317858-1345214	protein_coding	6557	9.3432	7.0741	11.175	9.5948	6.7541	6.9241	8.5173	8.4324	8.2926	8.7265	8.1445	11.0396	6.1752	8.4363	8.2702	8.9716	9.0705	6.2638	12.1668	11.551
ENSG00000049759	NEDD4L	chr18:55711598-56068772	protein_coding	15717	4.9708	5.1119	4.6621	5.1874	2.3714	2.6062	2.3039	2.1224	17.559	16.6116	13.1062	10.3176	11.642	8.8063	12.9619	12.1145	3.2568	3.0166	3.175	2.9922
ENSG00000049768	FOXP3	chrX:49106896-49121288	protein_coding	2578	0.1312	0.1366	0.0774	0.0249	0.1134	0.097	0.0521	0.0131	0.0724	0.0951	0	0.053	0.0568	0.0915	0.026	0.0506	0.021	0	0.0227	0
ENSG00000049769	PPP1R3F	chrX:49126305-49157929	protein_coding	4162	1.5672	2.067	1.1993	1.2957	2.23	2.5543	1.6071	1.7621	2.6443	2.1408	1.5026	1.9452	3.9407	4.8459	4.7854	5.4154	2.5118	2.3635	2.0077	2.2259
ENSG00000049860	HEXB	chr5:73935847-74018472	protein_coding	5067	6.503	6.2055	9.181	10.1674	5.8268	5.0972	7.5547	7.7572	2.1536	2.2908	3.5967	3.7619	1.893	0.5819	1.5525	1.3568	8.1352	5.1708	12.9671	12.3166
ENSG00000049883	PTCD2	chr5:71616193-71656052	protein_coding	3637	3.8524	3.057	4.1094	3.8391	3.858	4.0751	4.6015	4.1352	2.7952	2.8094	2.4181	2.583	2.0132	1.8971	2.2641	2.62	1.4298	1.6664	2.4668	1.9411
ENSG00000050030	KIAA2022	chrX:73952683-74145282	protein_coding	11719	0.2845	0.146	0.1947	0.2136	0.0561	0.1601	0.0894	0.1096	0.1194	0.1046	0.1126	0.1253	0.5311	0.0755	0.0257	0.0371	0.0092	0.0119	0.005	0.0022
ENSG00000050130	JKAMP	chr14:59951160-59972128	protein_coding	4350	6.2754	5.8868	10.5041	9.1942	7.3249	8.41	12.1037	10.5353	7.3327	7.7044	10.4795	9.4865	5.9586	7.1852	7.8875	8.9823	9.2395	5.8623	13.9115	12.585
ENSG00000050165	DKK3	chr11:11984652-12031316	protein_coding	5059	2.7123	3.2916	5.1024	4.5492	0.8234	1.0631	1.2	0.9286	1.8251	2.6499	4.1626	4.3824	4.313	0.7694	1.9255	2.1502	32.9027	10.5698	44.8279	46.1538
ENSG00000050327	ARHGEF5	chr7:144052380-144077725	protein_coding	5818	1.8104	1.643	1.7992	1.8648	0.4522	0.3225	0.3786	0.4531	0.0962	0.0562	0.0336	0.0705	0.2643	0.0405	0.046	0.0374	0	0.1442	0.0353	0.0902
ENSG00000050344	NFE2L3	chr7:26191859-26226745	protein_coding	4249	15.7146	11.6863	14.8016	15.1616	0.516	0.574	0.8092	0.8749	0.9	1.1543	1.0119	1.423	0.7238	0.0555	0.1339	0.1126	2.4604	2.2383	6.2171	5.9294
ENSG00000050393	MCUR1	chr6:13786788-13814800	protein_coding	6057	5.5677	5.0334	6.4325	6.1579	4.3074	4.1918	4.3773	4.6424	6.5442	5.1013	5.332	5.905	3.8804	4.5566	3.9735	3.6493	1.9048	2.8324	3.7611	3.4749
ENSG00000050405	LIMA1	chr12:50569570-50677329	protein_coding	6317	5.1703	4.4997	6.6148	6.7937	6.1199	6.4348	8.4369	9.0631	17.3629	17.1068	18.0757	26.0437	20.3886	29.7245	27.1151	34.1641	19.7991	25.5496	54.9115	51.6985
ENSG00000050426	LETMD1	chr12:51441744-51454207	protein_coding	4400	5.6441	5.1338	8.8744	8.7104	11.9753	10.7875	21.8199	21.4993	7.5249	7.5054	13.8138	7.2669	5.1754	2.8012	4.519	6.497	2.0805	3.2952	4.9176	4.6941
ENSG00000050438	SLC4A8	chr12:51785100-51902980	protein_coding	11415	2.1713	2.2125	2.3438	2.7023	0.2241	0.2246	0.2589	0.2487	0.3023	0.1862	0.2097	0.3322	1.0648	0.062	0.0968	0.0572	0.0475	0.0858	0.208	0.2207
ENSG00000050555	LAMC3	chr9:133884468-133969860	protein_coding	7594	1.7305	2.7758	0.9089	1.8894	0.0674	0.0412	0.0424	0.0401	0.4421	0.3445	0.1351	0.3374	0.2314	0.0078	0.0749	0.063	0.0642	0.0368	0.0386	0.0415
ENSG00000050628	PTGER3	chr1:71318035-71513491	protein_coding	9882	0.0147	0.0305	0.0635	0.0357	0.0222	0.0443	0.0082	0.0308	0.0378	0.0165	0.0198	0.0484	0.0963	0.0716	0.044	0.022	0.011	0.0142	0.0712	0.1142
ENSG00000050730	TNIP3	chr4:122052562-122148621	protein_coding	3768	0.0128	0	0.0076	0.0085	0	0.0166	0.0356	0.0269	0	0	0.013	0	0	0	0	0	0	0	0.0156	0.0766
ENSG00000050748	MAPK9	chr5:179660142-179719099	protein_coding	8955	3.9278	4.354	6.1154	6.219	3.1175	3.4009	5.0126	5.1856	3.3849	3.4961	5.3633	4.8714	2.9762	2.3247	4.1941	4.164	2.1231	2.2698	4.731	4.1322
ENSG00000050767	COL23A1	chr5:177664618-178017556	protein_coding	3878	1.495	2.3481	1.118	1.6471	0.9988	1.1288	1.3854	1.8389	1.7797	3.752	5.2538	2.537	4.4559	1.6728	2.5636	2.6928	1.8437	0.7934	0.9526	0.9542
ENSG00000050820	BCAR1	chr16:75262927-75301951	protein_coding	8335	7.0371	6.1144	2.1456	2.5995	3.3406	3.7439	1.7823	1.8449	3.5583	3.9817	1.4948	1.8238	4.2957	3.9127	1.8916	1.848	6.8496	3.9768	3.3206	3.3155
ENSG00000051009	FAM160A2	chr11:6232564-6255941	protein_coding	4736	4.907	4.0154	4.3482	4.4935	3.7651	4.0934	4.3902	4.3602	4.5688	4.8673	3.6521	4.2196	4.2516	3.4492	3.4845	3.5371	1.8643	2.7661	2.8787	3.0921
ENSG00000051108	HERPUD1	chr16:56965959-56977798	protein_coding	4178	2.7638	2.2277	3.0516	3.1576	10.635	7.8582	7.8312	9.3026	10.983	9.4694	10.9343	23.1391	14.8263	19.9164	35.0523	27.5771	19.888	7.889	27.0034	27.2615
ENSG00000051128	HOMER3	chr19:19040009-19052070	protein_coding	3422	2.7955	3.0727	1.9504	2.3075	5.4458	5.6104	3.666	3.5456	6.1051	6.9034	3.3553	4.3724	6.3549	7.7034	4.0204	4.9462	8.975	7.5202	4.858	5.3531
ENSG00000051180	RAD51	chr15:40986971-41024354	protein_coding	2863	9.771	5.9043	12.0844	10.0007	4.7733	4.4341	6.5022	6.3509	5.9289	4.9679	6.485	7.4455	1.2276	0.6591	0.9003	1.2766	0.2081	0.1954	0.7681	0.88
ENSG00000051341	POLQ	chr3:121150277-121264853	protein_coding	9099	7.5135	6.3419	9.2348	9.3131	6.3852	6.4193	8.104	8.3201	7.9029	7.0881	7.2599	7.5575	1.7382	0.7842	0.8535	1.3294	0.1012	0.1793	1.0021	0.9374
ENSG00000051382	PIK3CB	chr3:138372859-138553780	protein_coding	6531	4.0836	4.0904	3.0833	4.5118	1.2309	1.6086	1.1887	1.2937	0.5998	0.7259	0.6509	0.7375	0.9417	0.1987	0.3537	0.3864	0.6635	1.0065	0.9023	0.7956
ENSG00000051523	CYBA	chr16:88709690-88717560	protein_coding	3357	9.0384	9.6812	6.7037	7.3529	6.618	7.6005	6.5376	6.5137	1.9726	2.0941	1.4118	2.0148	2.1375	1.6337	1.1367	1.2961	2.5494	3.6662	5.4062	6.559
ENSG00000051596	THOC3	chr5:175344875-175461683	protein_coding	3437	7.5628	6.9528	7.0622	7.2938	6.5702	7.5145	6.8153	6.1654	4.6131	4.9707	4.2363	4.8503	2.386	2.1105	2.0842	2.1395	1.3711	1.0444	1.5355	1.634
ENSG00000051620	HEBP2	chr6:138724667-138743334	protein_coding	10356	3.2891	2.9537	3.7622	3.6822	3.5637	3.2488	4.0439	3.8052	1.9813	2.0759	2.392	2.4476	2.2979	2.3689	2.964	2.6848	3.1226	1.9627	3.4257	3.4262
ENSG00000051825	MPHOSPH9	chr12:123636866-123728561	protein_coding	10304	11.0331	9.8871	12.7831	13.0462	13.5182	13.7344	16.4503	15.3469	10.4726	8.9009	10.1996	8.8054	5.7488	4.4527	7.5726	7.9641	1.8452	1.8641	3.9978	3.8204
ENSG00000052126	PLEKHA5	chr12:19282647-19529334	protein_coding	12596	9.4206	8.5273	10.3619	10.5984	7.3278	7.6805	9.4796	10.2737	3.295	3.102	3.7354	2.4707	3.6971	0.6367	1.1613	1.1848	1.7072	1.4212	1.5549	1.5856
ENSG00000052344	PRSS8	chr16:31142755-31147083	protein_coding	3008	9.3482	15.4373	13.5311	17.6392	5.0777	4.2619	5.5994	4.6965	0.062	0.0543	0.2274	0.4429	0.4868	0.0196	0.0223	0.0434	0	0.0775	0	0
ENSG00000052723	SIKE1	chr1:115312099-115323306	protein_coding	5894	11.8533	10.1916	17.2858	16.3433	14.941	14.1433	20.8057	21.6061	13.6719	12.0658	15.3027	16.5588	9.578	7.2841	11.6653	12.1807	4.5491	7.2215	10.1876	8.7584
ENSG00000052749	RRP12	chr10:99116114-99161127	protein_coding	6801	8.6954	6.2951	7.3602	7.0134	4.3735	3.9723	4.2224	3.896	4.0181	4.6634	4.1883	7.8056	3.5421	5.0466	4.7595	3.9922	3.1062	4.1883	4.0696	4.0788
ENSG00000052795	FNIP2	chr4:159690289-159829201	protein_coding	10868	1.9961	1.8702	2.3594	2.2919	1.8627	1.9046	1.6956	1.6575	3.0723	3.2417	2.6929	3.7279	2.1088	1.324	1.2074	1.161	3.5586	1.2569	1.9882	1.8763
ENSG00000052802	MSMO1	chr4:166248774-166264312	protein_coding	2892	32.3771	29.695	61.5521	61.3002	23.1473	27.6569	41.7525	40.6683	27.9606	28.1237	29.7852	30.3218	17.6722	16.9047	17.8366	22.1317	3.3714	25.6633	32.756	31.48
ENSG00000052841	TTC17	chr11:43380481-43516483	protein_coding	11284	9.4198	11.0124	11.5516	12.8605	13.6848	14.0324	16.8452	17.4495	15.853	15.372	19.7273	11.4828	13.8408	10.2957	18.4931	20.3095	3.6626	6.1972	7.3298	6.775
ENSG00000052850	ALX4	chr11:44281993-44331716	protein_coding	5750	0.0084	0	0	0.0112	0.0127	0.0435	0.042	0.1176	0.0973	0.0569	0.068	0.0713	0.5094	0.0205	0.0233	0.0454	0.1696	0.0162	0.3569	0.3697
ENSG00000053108	FSTL4	chr5:132532146-132948255	protein_coding	6733	0.5023	0.5753	0.3855	0.4481	0.8141	1.1796	0.5665	0.5722	0.1662	0.2792	0.254	0.0913	0.3806	0.4204	0.1889	0.2068	0.1689	0.0692	0.0174	0.0507
ENSG00000053254	FOXN3	chr14:89591214-90085493	protein_coding	11033	16.1152	17.3367	13.2646	17.1097	7.22	6.711	7.0243	7.7745	10.0595	10.8022	11.4874	9.4962	10.1671	7.1411	10.1153	8.5184	5.8178	6.4058	6.5346	6.4082
ENSG00000053328	METTL24	chr6:110567130-110679475	protein_coding	1774	0.2451	0.2552	0.0643	0.1809	0.3296	0.3173	0.424	0.5906	1.6824	1.6588	1.2394	0.9436	0.4127	0.0665	0.0755	0.1226	0	0	0.0165	0.0148
ENSG00000053371	AKR7A2	chr1:19630458-19638640	protein_coding	1781	14.0523	11.7793	14.7497	15.067	20.1064	19.5931	22.8356	20.4185	20.2662	17.8998	18.7097	19.1423	11.3058	10.6952	7.612	9.0638	7.9684	9.214	16.0507	16.4154
ENSG00000053372	MRTO4	chr1:19578032-19586622	protein_coding	2822	15.1519	11.0709	22.8726	18.4834	14.1137	13.6729	21.2465	21.1499	16.6571	14.2224	16.3961	24.3677	7.732	10.4906	10.2011	9.7137	6.4877	7.3019	14.6388	14.6285
ENSG00000053438	NNAT	chr20:36149616-36152092	protein_coding	1294	28.302	21.6167	36.3033	23.615	19.315	22.2308	18.0192	16.1148	644.648	544.717	246.788	242.188	327.908	473.013	305.999	319.406	92.5943	101.093	45.157	46.7077
ENSG00000053501	USE1	chr19:17326154-17330638	protein_coding	2431	1.272	1.6763	2.1119	2.1786	1.5332	1.6206	2.5968	2.3356	2.9541	3.4634	4.4016	3.6395	2.3192	2.5472	5.0121	4.3851	1.8271	1.9561	3.4493	3.6057
ENSG00000053524	MCF2L2	chr3:182895830-183146566	protein_coding	20568	0.5661	0.6898	0.649	0.7694	0.2771	0.2402	0.2468	0.2744	0.0317	0.0159	0.0238	0.0316	0.0641	0.0143	0.0309	0.0106	0.0342	0.0204	0.0428	0.0332
ENSG00000053702	NRIP2	chr12:2934513-2944710	protein_coding	2803	0.0689	0.0718	0.0712	0.0687	0	0	0.0096	0	0	0.0583	0.1569	0.3412	0.2612	0	0.0119	0	0.1353	0.183	0.1569	0.2809
ENSG00000053747	LAMA3	chr18:21269406-21535030	protein_coding	13522	0.0929	0.1339	0.1413	0.1852	0.0378	0.0185	0.0199	0.0125	0.1311	0.0907	0.1409	0.0379	0.2274	0.0087	0.052	0.0161	1.2819	0.5482	3.3998	3.3208
ENSG00000053770	AP5M1	chr14:57735626-57756797	protein_coding	4371	9.3734	7.3432	16.7898	14.1656	5.0493	4.9932	7.5223	7.9717	7.0627	6.3397	8.5959	9.2143	5.5615	5.2213	8.4546	8.7898	4.3125	5.4182	8.7401	7.7333
ENSG00000053900	ANAPC4	chr4:25378834-25420120	protein_coding	7494	4.758	4.2361	7.7225	7.35	5.4221	4.8233	5.5453	5.1096	4.7293	4.9194	6.0764	6.2541	2.6869	2.8487	3.5198	3.6695	1.6335	1.9969	3.4624	3.537
ENSG00000053918	KCNQ1	chr11:2465913-2870339	protein_coding	3971	0.292	0.4941	0.3735	0.5335	0.092	0.0945	0.0744	0.0596	0.3758	1.0292	1.6487	1.1269	0.9035	1.0544	0.9863	1.3477	0.7912	0.1761	0.3839	0.4031
ENSG00000054116	TRAPPC3	chr1:36602172-36615098	protein_coding	3313	8.4147	6.6816	12.2596	10.5606	6.5956	5.8516	9.6813	9.834	8.4736	8.9564	11.7834	11.5382	6.9618	5.7139	9.8209	10.3885	6.0985	5.1925	12.3808	12.3338
ENSG00000054118	THRAP3	chr1:36690016-36770958	protein_coding	4736	51.6815	43.6594	63.1216	65.4441	41.4165	39.2568	52.143	52.7717	46.5741	40.0427	43.1233	53.1815	28.7718	27.0832	32.5409	27.5068	18.4368	20.3173	42.1711	42.0036
ENSG00000054148	PHPT1	chr9:139743175-139745488	protein_coding	1908	16.6874	16.6115	23.1259	23.6533	20.7215	22.9103	32.9871	30.5729	18.4284	18.6791	21.7664	26.0861	12.5488	15.3305	24.2107	26.7497	17.7433	18.3009	37.6786	40.0399
ENSG00000054179	ENTPD2	chr9:139942549-139948497	protein_coding	2633	0.422	0.4204	0.065	0.2804	0.0278	0.0475	0	0	0	0	0	0	0.0278	0	0	0	0	0	0	0
ENSG00000054219	LY75	chr2:160628361-160761260	protein_coding	9430	0.123	0.1174	0.1694	0.2451	0	0	0.0285	0.0143	0.0198	0.0087	0.0104	0.0072	0.0155	0.0063	0	0	0	0.0148	0.0031	0.0028
ENSG00000054267	ARID4B	chr1:235294948-235491534	protein_coding	11073	6.0825	5.1431	8.4385	8.4326	5.3063	5.851	7.2682	7.2611	8.0691	7.3009	8.7941	7.9656	6.8043	4.1328	7.3339	6.688	2.4361	3.1534	6.6381	5.911
ENSG00000054277	OPN3	chr1:241753403-241840678	protein_coding	3480	5.5118	5.0598	7.0323	5.6265	6.5311	5.4809	6.2294	5.4288	9.1926	9.3487	14.9386	8.1083	18.242	21.3522	30.7806	45.174	14.818	54.3091	20.8773	20.06
ENSG00000054282	SDCCAG8	chr1:243419319-243663394	protein_coding	5353	1.2997	1.297	2.094	1.8169	3.5359	3.1543	4.2204	3.7124	4.321	4.6117	5.011	3.88	3.8163	3.0627	3.6144	4.6657	3.7845	2.9088	5.3347	4.7409
ENSG00000054356	PTPRN	chr2:220154344-220174370	protein_coding	8261	0.6784	0.7186	0.6077	0.6955	0.0088	0.0151	0.013	0.0245	0.0339	0.0594	0.0355	0.0455	0.3368	0.0071	0.0446	0.0579	0.2098	0.0903	1.48	1.5789
ENSG00000054392	HHAT	chr1:210501595-210849638	protein_coding	4296	0.3261	0.2225	0.2789	0.2615	2.1604	2.2563	3.139	3.3199	2.3881	2.6448	3.23	2.0277	2.3691	1.3727	0.5688	1.7724	4.3626	5.0244	7.8348	7.068
ENSG00000054523	KIF1B	chr1:10270862-10441661	protein_coding	17693	15.142	13.2533	13.6446	14.6133	9.5456	9.7447	9.1278	8.9033	9.4516	9.4018	12.7443	13.0847	29.6184	30.5514	60.311	51.7248	13.4185	26.3439	20.4719	19.1568
ENSG00000054598	FOXC1	chr6:1610680-1614127	protein_coding	3447	0.0561	0.2043	0.1572	0.0372	3.0742	2.8665	0.9741	0.8824	2.7869	3.818	5.1878	5.1831	4.1846	0.633	1.0002	0.6059	0.7543	4.923	3.4023	3.152
ENSG00000054611	TBC1D22A	chr22:47158517-47571336	protein_coding	5305	2.3862	2.3708	2.1506	1.9241	3.1133	3.3125	2.9876	2.6184	3.0942	2.4654	1.9709	2.331	2.0841	2.1121	1.8614	2.1981	3.0325	2.2497	2.9292	3.0573
ENSG00000054654	SYNE2	chr14:64319682-64693165	protein_coding	31405	12.4461	13.3426	13.8757	15.3496	10.3926	10.1794	8.4673	7.7666	16.7348	14.7451	15.6356	13.7187	6.9292	1.9229	3.074	3.5302	0.4019	1.1712	1.1632	1.19
ENSG00000054690	PLEKHH1	chr14:68000017-68056329	protein_coding	10817	4.2656	4.7672	3.6362	3.9645	3.7834	3.2896	2.5256	2.4277	0.7588	0.665	0.6143	0.4674	0.6498	0.1036	0.2135	0.1408	0.3505	0.5086	0.0894	0.1189
ENSG00000054793	ATP9A	chr20:50213052-50385173	protein_coding	8317	4.2581	4.1133	4.3348	4.2029	3.5148	3.1731	3.4624	3.2874	8.3432	7.9413	8.8883	5.8735	10.943	6.339	9.1885	7.9258	6.135	8.2006	8.813	9.2423
ENSG00000054796	SPO11	chr20:55904814-55919050	protein_coding	1867	0	0	0	0.0172	0	0	0	0	0	0	0	0	0	0.0316	0	0	0	0	0	0
ENSG00000054803	CBLN4	chr20:54572495-54580528	protein_coding	3024	0	0	0	0	0	0	0	0	0	0	0	0.0226	0	0	0.0111	0	0	0	0	0
ENSG00000054938	CHRDL2	chr11:74407473-74442430	protein_coding	3073	0.0157	0.0164	0.0464	0.0209	0	0.0204	0	0.033	0.4249	0.3458	0.1749	0.0333	0.4289	0.3646	0.6536	0.708	0	0.0152	0	0.0085
ENSG00000054965	FAM168A	chr11:73111531-73309234	protein_coding	7823	9.2887	6.6303	7.4305	6.7373	12.7702	12.4225	9.3331	7.9275	12.2917	12.0268	10.6362	10.1439	10.2488	7.5836	6.5895	7.5976	7.4226	5.858	8.5338	8.6854
ENSG00000054967	RELT	chr11:73087308-73108519	protein_coding	6322	1.9106	1.2892	1.5069	1.4724	1.6877	1.6618	1.5679	1.3365	1.4458	1.4352	0.9197	1.5508	0.6833	0.4944	0.2859	0.2409	0.8996	0.2728	0.5983	0.6476
ENSG00000054983	GALC	chr14:88304163-88460009	protein_coding	6825	1.876	2.1156	3.3934	3.137	2.7519	2.8771	3.7273	3.6842	3.6213	3.8925	5.1401	3.809	4.2377	3.4217	2.9967	3.8443	2.4286	2.9372	4.1283	3.9145
ENSG00000055044	NOP58	chr2:203130438-203168389	protein_coding	3299	31.0628	24.72	47.3184	44.9613	32.1209	27.9792	38.8895	41.5826	29.4868	23.762	31.5016	42.4551	13.2503	16.3029	19.5222	16.3546	5.7795	10.7823	19.3477	17.6524
ENSG00000055070	SZRD1	chr1:16679069-16724640	protein_coding	4747	17.8624	15.0493	14.8531	13.3547	16.6113	15.6374	14.0284	13.0075	23.5573	21.9036	17.5593	22.1502	15.2703	18.1006	10.1755	9.9085	13.4647	12.335	19.7582	18.7362
ENSG00000055118	KCNH2	chr7:150642048-150675403	protein_coding	7017	1.3495	1.6992	0.9715	1.3723	3.0828	2.8786	1.8797	1.4979	6.473	8.2709	4.8532	4.3717	8.4939	11.0096	7.2367	7.6146	1.4898	2.1659	1.8343	1.8588
ENSG00000055130	CUL1	chr7:148395005-148498128	protein_coding	3548	29.1279	25.3106	42.1567	38.169	23.296	22.1556	27.794	26.0048	25.9716	26.4027	28.437	31.6863	17.5209	21.8738	18.6805	20.6518	11.1601	13.639	22.2704	20.4966
ENSG00000055147	FAM114A2	chr5:153369687-153418496	protein_coding	6543	1.8608	1.7915	2.7463	2.6982	2.8928	2.5901	3.305	3.2645	3.3925	3.9478	3.4574	3.9836	3.2901	4.2362	3.4635	4.2228	2.1773	2.6505	5.1039	4.8132
ENSG00000055163	CYFIP2	chr5:156693088-156822606	protein_coding	10509	7.7743	6.9272	6.8857	7.2633	1.3074	1.7971	1.6334	1.5405	4.189	3.5469	3.3149	3.3481	4.3546	1.7508	3.4369	2.9521	1.9226	3.9393	3.4232	3.3588
ENSG00000055208	TAB2	chr6:149539776-149732749	protein_coding	5758	9.9852	10.3712	13.3547	13.641	7.7168	8.1456	9.9884	10.5475	10.6419	12.6347	14.1198	13.1529	12.8943	9.0948	16.08	14.8488	5.8795	5.9914	12.6381	11.3171
ENSG00000055211	GINM1	chr6:149887429-149912884	protein_coding	2248	6.7056	6.8034	9.1226	9.7952	5.8191	4.5066	7.2176	7.036	8.8371	8.5451	13.6493	10.3029	7.3611	3.5153	8.8152	8.3035	8.9395	8.316	19.5505	18.5505
ENSG00000055332	EIF2AK2	chr2:37326352-37384208	protein_coding	10753	13.4121	10.9199	13.2042	14.2418	7.5235	7.0428	8.1415	7.8795	12.4031	11.3191	12.6044	10.0548	7.7217	5.7585	6.7707	8.2223	3.6672	5.5668	9.6358	9.1328
ENSG00000055483	USP36	chr17:76783462-76837523	protein_coding	10409	4.1868	3.9246	2.584	2.8617	4.3319	4.0373	3.4169	2.8605	2.921	3.1098	2.1921	2.1365	2.5675	2.4079	2.6724	2.4161	1.5507	1.3884	1.5464	1.5808
ENSG00000055609	KMT2C	chr7:151832009-152133090	protein_coding	22650	7.6237	8.1339	4.1216	5.4688	7.9114	8.7275	4.2969	4.2212	12.5467	13.9449	7.4637	5.6286	12.9017	9.7819	8.6367	7.5957	4.8619	6.2159	2.9695	2.9917
ENSG00000055732	MCOLN3	chr1:85483764-85514182	protein_coding	6623	0.5909	0.4482	0.6891	0.6155	3.3213	3.0876	2.9974	4.7712	0.1972	0.1481	0.059	0.2631	0.4091	0.8548	0.4903	0.4336	0.1309	0.2604	0.2346	0.1545
ENSG00000055813	CCDC85A	chr2:56411257-56613308	protein_coding	3982	0.0364	0.0253	0.0358	0	0.6974	0.7067	0.4857	0.4753	0.2342	0.1848	0.1472	0.0343	1.3791	0.3851	0.0925	0.1421	0.0544	0.1405	0.0147	0.0198
ENSG00000055917	PUM2	chr2:20448451-20551995	protein_coding	6858	18.2044	16.0582	20.4831	21.4926	14.5884	14.2252	18.5509	19.2983	17.6659	17.4856	21.2949	20.8362	15.1929	11.8754	19.6119	17.1494	5.284	6.3152	9.4995	8.4801
ENSG00000055950	MRPL43	chr10:102729214-102747272	protein_coding	3573	7.1262	6.8008	8.0147	8.0314	6.1565	6.2484	7.5784	8.0117	5.9254	6.7947	6.4818	6.9412	5.8199	5.9584	6.5393	5.9793	5.018	4.8407	8.575	8.9977
ENSG00000055955	ITIH4	chr3:52846990-52865495	protein_coding	5462	0.0265	0.0092	0.0731	0.0059	0.0134	0.0343	0.0344	0.0557	0.0854	0.0748	0.0805	0.0813	0.1743	0.1728	0.1961	0.247	0.0099	0.1878	0.0913	0.0673
ENSG00000055957	ITIH1	chr3:52811602-52826078	protein_coding	4543	0	0	0.0126	0	0.0161	0	0	0.0074	0	0.018	0.0108	0	0	0	0	0	0	0	0	0
ENSG00000056050	C4orf27	chr4:170650615-170679104	protein_coding	1436	15.0059	11.0358	22.5439	23.2245	15.3693	14.6324	23.6826	22.6645	11.6258	10.1324	17.3525	17.3659	7.5464	6.9815	9.1144	10.3627	2.7159	7.1423	15.6192	12.1534
ENSG00000056097	ZFR	chr5:32354455-32444867	protein_coding	6792	26.4196	22.3918	35.5523	31.7488	24.1343	23.9391	29.5562	25.5317	25.8021	25.8634	30.9759	28.1203	25.7328	29.3736	34.0801	31.8838	14.4429	22.6852	27.4328	25.4364
ENSG00000056277	ZNF280C	chrX:129336684-129402873	protein_coding	4634	15.0554	12.0399	12.9995	11.9071	23.0565	23.3465	22.1557	24.177	16.9063	17.1811	15.4992	10.232	12.4667	9.2646	7.6642	7.4741	2.6066	6.4386	5.1628	5.5048
ENSG00000056291	NPFFR2	chr4:72897520-73013784	protein_coding	2359	0.3277	0.4265	0.4836	0.6259	0.2169	0.0795	0.1025	0.2865	0	0	0	0.0724	0.1552	0	0	0	0	1.8181	0.0124	0
ENSG00000056487	PHF21B	chr22:45277041-45405880	protein_coding	5753	5.8032	5.4393	2.5582	2.9459	2.1214	1.9132	1.3494	1.1573	2.0265	2.1171	1.5627	1.0866	3.2455	0.8406	1.5652	1.5807	0.273	0.0648	0.0306	0.0776
ENSG00000056558	TRAF1	chr9:123664670-123691451	protein_coding	6449	0.8241	0.9049	0.8757	1.0403	0.5326	0.7079	0.8539	0.828	0.8099	0.8112	1.0379	0.5456	0.9083	0.3475	1.0485	1.5316	0.1176	0.1663	0.2455	0.2604
ENSG00000056586	RC3H2	chr9:125606834-125667620	protein_coding	11545	8.4075	6.8895	9.2201	9.1666	7.3682	7.5022	8.3648	8.2172	13.7658	12.8225	13.9658	13.9513	14.9231	15.9832	22.9113	22.8466	14.9575	19.0557	18.389	17.308
ENSG00000056661	PCGF2	chr17:36890149-36906070	protein_coding	3511	7.3622	8.2965	3.5907	4.5711	6.7856	7.2137	4.0091	3.9851	4.7018	4.8193	2.9363	2.2184	5.0051	1.6797	1.1918	1.2765	0.8022	1.0091	1.0355	0.9941
ENSG00000056736	IL17RB	chr3:53880606-53899827	protein_coding	3038	2.64	2.2522	3.4832	3.4444	0.866	0.597	0.9196	0.9456	0.3991	0.2153	0.386	0.551	0.4097	0.0194	0.0331	0	0	0.046	0.0579	0.0605
ENSG00000056972	TRAF3IP2	chr6:111877656-111927481	protein_coding	6553	1.5704	1.7274	1.4625	2.0475	1.1375	1.0975	1.6684	1.9031	0.2847	0.1871	0.4175	0.3753	0.581	0.261	0.4955	0.3121	1.6449	0.6474	1.821	1.8743
ENSG00000056998	GYG2	chrX:2746828-2800859	protein_coding	3646	20.7784	19.4145	27.5837	30.2409	12.7079	12.5553	18.3088	18.8079	6.1137	6.1878	7.5848	6.3899	7.8121	4.4319	9.2728	9.5352	13.6531	14.794	25.7006	23.5879
ENSG00000057019	DCBLD2	chr3:98514784-98620533	protein_coding	11274	14.905	12.2136	17.6336	16.1688	13.6645	13.8063	15.4043	15.5584	8.4133	8.1858	7.6102	8.0175	5.2542	3.0339	3.8094	3.8363	41.2041	24.9556	60.7501	57.367
ENSG00000057149	SERPINB3	chr18:61322430-61329197	protein_coding	1777	0.2175	0.0566	0	0.0361	0	0	0	0	0	0	0	0	0	0	0	0	0	0	0.0495	0.0886
ENSG00000057252	SOAT1	chr1:179262924-179327815	protein_coding	7033	5.3996	3.3621	8.3382	5.5498	6.9205	6.1798	7.7536	7.3475	5.5034	5.1256	6.3358	6.8875	2.509	1.4255	1.8372	2.6541	1.8176	3.9838	6.5158	6.1011
ENSG00000057294	PKP2	chr12:32943678-33049774	protein_coding	6069	3.9168	4.7831	4.7749	5.6697	2.9382	4.2453	8.5515	16.2051	0.6301	0.4041	0.3703	0.636	0.8083	1.1855	1.2851	0.5951	2.1956	0.5761	0.8358	0.6313
ENSG00000057468	MSH4	chr1:76262566-76378923	protein_coding	3266	0.074	0.0924	0.1135	0.0393	0.0224	0.0957	0.074	0.0621	0.1713	0.2503	0.0898	0.0628	0.0897	0.2347	0.0512	0.0799	0.1659	0.2569	0.0269	0.1045
ENSG00000057593	F7	chr13:113760104-113774995	protein_coding	3792	0.2803	0.199	0.1279	0.2793	0.1542	0.1154	0.17	0.2228	0.246	0.2156	0.116	0.1441	0.3283	0.1089	0.256	0.3557	0.0143	0.0246	0.0309	0.0208
ENSG00000057608	GDI2	chr10:5807185-5884095	protein_coding	4033	91.1791	78.2769	140.024	128.76	103.723	101.053	152.724	151.428	92.8964	89.7078	131.495	110.716	48.9649	41.4111	55.2863	62.1972	31.0791	36.9674	73.5925	69.5045
ENSG00000057657	PRDM1	chr6:106534194-106557814	protein_coding	6369	0.3945	0.3081	0.2553	0.126	0.459	0.5695	0.1898	0.2388	0.0293	0	0.0077	0.0322	0.1954	0	0.0105	0.0137	0.3487	0.0439	0.2992	0.2555
ENSG00000057663	ATG5	chr6:106632350-106773666	protein_coding	3924	10.0841	9.3208	16.0203	16.2129	8.1015	9.6099	15.4988	18.9568	6.2986	5.8328	6.9728	8.4096	4.4597	4.704	6.4065	6.021	3.4924	3.5879	8.9885	7.4772
ENSG00000057704	TMCC3	chr12:94960899-95044338	protein_coding	6515	0.5636	0.2934	0.4203	0.5025	0.5384	0.3648	0.4577	0.3735	3.2783	3.4253	4.1172	3.9535	3.8774	6.7527	5.0763	4.9889	1.7543	3.3274	4.8648	4.3585
ENSG00000057757	PITHD1	chr1:24104894-24114722	protein_coding	2186	20.8201	15.8799	26.0564	23.9784	16.6488	14.876	21.1732	20.9954	11.861	10.171	14.9305	15.4708	9.5461	6.9332	12.5719	9.8328	8.1523	6.9737	12.5539	12.8819
ENSG00000057935	MTA3	chr2:42721708-42984087	protein_coding	10580	12.3984	14.8312	17.4963	21.0279	5.6227	5.8044	7.7313	7.2832	4.7074	4.543	5.5786	3.7196	3.3427	2.2909	3.2082	3.9193	1.5206	1.366	3.7439	3.8969
ENSG00000058056	USP13	chr3:179370542-179507189	protein_coding	8440	6.4802	5.6568	6.1303	6.1307	5.4551	5.283	5.4235	4.9053	6.2435	6.4793	6.2232	6.9333	8.5019	12.9824	10.2643	10.8107	8.7155	6.0981	6.7497	6.2967
ENSG00000058063	ATP11B	chr3:182511287-182639423	protein_coding	9196	6.1313	4.7705	6.7987	6.6319	7.3192	7.222	8.5326	8.2875	12.6877	13.3511	14.7917	12.9496	10.6853	10.4722	12.0522	12.1458	5.5899	6.5904	10.7412	10.1083
ENSG00000058085	LAMC2	chr1:183155372-183214035	protein_coding	6543	2.3777	2.4528	1.9355	3.4929	0.067	0.2294	0.2053	0.4494	0.3706	0.7496	0.3211	0.7048	0.3917	0.0901	0.1381	0.3525	8.9492	7.3246	10.6513	10.5208
ENSG00000058091	CDK14	chr7:90095737-90839905	protein_coding	6841	6.1303	4.5007	7.0712	6.583	4.7966	4.525	5.1833	5.4146	28.5075	26.6221	28.3757	19.7644	18.9767	23.2667	19.1762	21.3453	1.9953	4.9202	7.4745	6.7633
ENSG00000058262	SEC61A1	chr3:127770483-127790526	protein_coding	4697	29.923	26.4881	35.3844	36.9847	24.2721	24.6843	31.175	29.9832	33.7562	37.1382	34.7226	53.1067	30.9905	30.2837	41.0211	35.0997	61.7204	31.5231	94.8739	96.4717
ENSG00000058272	PPP1R12A	chr12:80167342-80329240	protein_coding	12490	12.893	11.0608	15.2775	15.5764	8.9347	9.6233	11.343	11.8897	13.5158	11.7411	13.8402	13.0735	10.687	9.8115	12.6258	12.2451	6.4141	9.8353	15.4225	15.219
ENSG00000058335	RASGRF1	chr15:79252288-79383115	protein_coding	8683	0.089	0.1333	0.1117	0.0961	0	0.0072	0	0.0039	0	0.0094	0.0056	0.0079	0.0169	0	0.0077	0.01	0.0811	0.0054	0.0371	0.0332
ENSG00000058404	CAMK2B	chr7:44256748-44374176	protein_coding	8159	0.0118	0.0123	0.028	0.0079	0.0448	0.0077	0.0395	0.0787	0.1143	0.1904	0.2216	0.4061	0.2961	0.5999	0.1477	0.1547	4.5078	0.5257	0.4456	0.4278
ENSG00000058453	CROCC	chr1:17066767-17299474	protein_coding	8871	7.6195	7.2138	2.5111	2.7572	5.5443	5.689	2.6981	2.625	4.5419	3.953	1.6138	1.6251	3.3758	1.0238	0.7132	0.9859	0.7633	0.7147	0.423	0.5887
ENSG00000058600	POLR3E	chr16:22308729-22346424	protein_coding	9454	7.8038	7.0084	8.4777	8.1587	6.2691	5.5829	6.3932	6.8494	5.0017	5.1705	5.1784	4.7588	4.4146	5.1151	5.3606	5.4354	1.9595	2.584	2.7384	3.0591
ENSG00000058668	ATP2B4	chr1:203595688-203713209	protein_coding	9721	10.2187	11.1373	9.5975	10.2262	13.6072	16.2565	14.6846	14.2265	34.6355	46.4588	38.3747	21.6013	30.5054	15.9065	23.3949	23.8167	6.7534	6.7189	7.8357	7.6159
ENSG00000058673	ZC3H11A	chr1:203764781-203823252	protein_coding	9700	15.5106	15.1654	18.8572	19.3749	18.677	19.844	22.0607	21.717	29.2587	29.4609	31.6779	25.6241	27.8917	24.878	31.6898	32.7095	11.2689	14.9567	19.3537	19.177
ENSG00000058729	RIOK2	chr5:96496570-96518964	protein_coding	5502	5.4883	4.6542	9.352	9.2468	6.0303	6.2741	10.3946	10.4855	5.1702	4.4273	6.6336	7.941	3.9924	5.4557	8.4141	7.5365	2.7566	4.2281	8.4409	7.484
ENSG00000058799	YIPF1	chr1:54317391-54356407	protein_coding	2259	7.3788	6.3471	11.5529	10.9268	4.3027	4.2355	5.4463	5.745	6.0278	5.9706	8.6515	7.8484	5.8991	6.161	5.9568	6.857	5.6109	5.8197	9.1501	8.5156
ENSG00000058804	NDC1	chr1:54231132-54304533	protein_coding	5135	25.8088	22.7298	42.4088	39.9684	22.3013	21.1661	31.5919	32.2961	15.2387	14.3905	17.8691	22.2195	5.4897	4.6627	4.7913	5.728	1.7511	2.7872	5.2015	4.845
ENSG00000058866	DGKG	chr3:185823456-186080026	protein_coding	10978	0.0572	0.0183	0.0182	0.0117	0.1664	0.2449	0.1517	0.0647	0	0	0	0.0031	0.02	0.0161	0.0061	0.004	0.1776	0.0297	0.2457	0.2032
ENSG00000059122	FLYWCH1	chr16:2961937-3001209	protein_coding	8413	1.631	1.6863	0.8577	0.9462	1.4159	1.1819	0.8717	0.9641	2.062	2.1861	1.4229	1.5592	2.054	1.6823	2.1605	2.0481	1.674	1.2634	1.9899	2.0495
ENSG00000059145	UNKL	chr16:1413205-1464752	protein_coding	8504	3.1702	2.7687	1.9118	2.0231	1.4953	1.2722	0.9413	0.9498	1.3819	1.4611	1.0227	0.8195	1.524	0.8599	1.1691	1.2638	1.0956	0.6085	0.9412	0.9845
ENSG00000059377	TBXAS1	chr7:139476849-139720125	protein_coding	6271	0.1079	0.0321	0.0819	0.1126	0.1981	0.1596	0.1628	0.1886	0.1487	0.1564	0.1325	0.1035	0.0701	0.0188	0.0053	0.0208	0.0691	0.0372	0.1262	0.1423
ENSG00000059378	PARP12	chr7:139723543-139763521	protein_coding	6285	1.2377	1.0166	1.2888	1.2155	0.0116	0.0498	0.0385	0.1237	0.2523	0.3512	0.3731	0.4022	0.1748	0.0657	0.1012	0.1385	0.6291	0.5044	1.2922	1.0648
ENSG00000059573	ALDH18A1	chr10:97365695-97416463	protein_coding	3756	31.7984	29.6819	42.5103	42.8407	30.6449	31.6344	41.8962	40.5993	27.6621	30.2072	35.2005	34.6155	16.2777	12.8905	14.803	16.8785	12.0275	11.0839	34.4165	33.7342
ENSG00000059588	TARBP1	chr1:234527058-234614849	protein_coding	7743	9.2162	7.9853	9.0728	10.4425	7.1353	6.8569	8.1598	8.9741	7.0826	6.2814	8.8594	6.0089	6.3263	2.6885	6.2556	7.1366	1.9798	2.4926	4.2939	4.1689
ENSG00000059691	PET112	chr4:152591655-152682175	protein_coding	11757	1.3561	1.2581	2.1713	2.0804	1.7715	1.8617	2.8995	2.6073	1.8404	1.7868	1.787	2.4203	1.1086	1.4797	1.3011	1.4285	0.6773	0.9318	1.3741	1.413
ENSG00000059728	MXD1	chr2:70124819-70170077	protein_coding	6321	0.3363	0.4059	0.4196	0.4723	0.5434	0.5441	0.5057	0.3475	1.6673	1.3061	1.3063	1.0592	1.448	0.8956	2.2136	1.3629	0.7712	0.7228	0.937	0.9217
ENSG00000059758	CDK17	chr12:96672038-96794338	protein_coding	6547	6.6122	5.7479	8.5868	8.6044	6.4296	6.5908	7.6235	7.3819	7.9063	8.0032	8.739	7.524	7.4932	7.5214	8.8146	8.4271	6.7595	6.0598	10.515	10.6307
ENSG00000059769	DNAJC25	chr9:114393631-114432508	protein_coding	3675	2.4716	2.163	3.5934	3.3452	2.2272	2.1101	3.0554	2.5934	2.7663	3.1585	3.3504	3.6903	2.3709	1.5887	4.4723	3.4927	2.0488	1.9409	3.0875	3.2707
ENSG00000059804	SLC2A3	chr12:8071825-8088871	protein_coding	6159	89.7816	75.2556	115.859	113.14	18.4274	22.9371	27.7787	19.9576	5.2849	8.9453	13.383	15.0698	6.3722	2.2884	2.1522	2.1194	6.6664	4.2767	15.1713	15.0629
ENSG00000059915	PSD	chr10:104162375-104181296	protein_coding	6327	1.0156	1.0496	0.9151	0.8726	0.566	0.4448	0.7218	1.0897	0.6781	0.7493	0.4479	0.5831	0.7638	0.1491	0.5079	0.3301	0.0771	0.4937	0.2549	0.3152
ENSG00000060069	CTDP1	chr18:77439800-77514510	protein_coding	5296	6.5046	5.7662	3.7269	4.0669	3.6016	3.1882	2.2775	2.2591	3.8567	4.3526	2.3526	3.3155	3.8297	3.9976	2.9896	2.9331	2.3524	2.1391	2.5909	2.8593
ENSG00000060138	YBX3	chr12:10851682-10875911	protein_coding	8615	17.2173	13.7993	14.4185	14.2962	14.5059	12.4274	12.2948	12.534	24.8241	23.9392	23.6044	25.5244	11.7544	11.4112	21.3782	20.0358	14.6876	13.7234	18.735	17.4736
ENSG00000060140	STYK1	chr12:10771537-10826917	protein_coding	3424	0.381	0.5583	0.6081	0.8062	0.0213	0.0548	0.0471	0.0494	0.0817	0.0716	0.0143	0.0399	0.0214	0.0689	0.0293	0.0381	0.9966	0.1498	0.8563	0.7665
ENSG00000060237	WNK1	chr12:861758-1020618	protein_coding	14370	20.96	19.0734	10.2002	12.4217	12.7192	13.7258	7.9093	7.8295	16.7776	20.4214	10.3295	8.3441	14.3587	10.5634	8.9567	8.4448	12.4429	7.2833	8.5877	9.3032
ENSG00000060303	RPS17P5	chr6:50824967-50825375	pseudogene	408	0	0	0	0	0	0	0	0	0	0	0	0	0	0	0	0	0	0	0	0
ENSG00000060339	CCAR1	chr10:70480768-70552134	protein_coding	6002	27.1842	22.749	32.6521	32.4729	18.5807	20.0466	23.2912	20.519	23.7284	20.4152	23.0946	23.4208	16.1641	15.6324	14.3611	14.8976	8.5014	9.5072	16.9848	15.059
ENSG00000060491	OGFR	chr20:61436186-61445352	protein_coding	4702	5.4768	4.772	3.6396	3.4269	5.0513	5.5195	4.8332	4.9092	5.0977	5.8238	4.3955	3.7052	4.7495	2.1949	3.3104	3.3406	3.0528	3.1232	3.866	4.5321
ENSG00000060558	GNA15	chr19:3136190-3163767	protein_coding	2613	0.0185	0.077	0.0109	0.0369	0	0	0	0	0	0	0	0	0.028	0.0226	0	0.05	0	0	0	0
ENSG00000060566	CREB3L3	chr19:4153597-4173051	protein_coding	2678	0.1985	0.1503	0.0533	0.0959	0	0	0	0	0	0	0	0	0.0273	0	0.025	0	0	0	0	0
ENSG00000060642	PIGV	chr1:27113962-27124889	protein_coding	3382	3.0286	3.0644	4.3433	4.5747	3.6303	4.068	5.7903	5.0265	2.1235	2.272	3.2939	1.8282	2.2733	1.6391	2.326	3.2678	1.3133	1.1579	2.202	2.2581
ENSG00000060656	PTPRU	chr1:29563027-29653325	protein_coding	6700	8.8842	9.5738	7.1434	7.6605	6.7191	7.1497	6.1905	5.584	4.7608	4.7459	4.0838	1.5092	4.2839	2.0596	2.1034	2.0652	5.4733	2.0944	5.4306	6.0165
ENSG00000060688	SNRNP40	chr1:31732416-31769662	protein_coding	4011	24.3683	17.8359	27.598	24.584	21.0077	20.3153	24.4651	23.9636	15.6025	13.2467	13.6309	18.7625	8.8901	9.7774	9.7977	9.6221	3.6867	4.6608	8.9251	8.7153
ENSG00000060709	RIMBP2	chr12:130880681-131200826	protein_coding	8738	0.094	0.0288	0.0392	0.0514	0.9116	1.002	0.7716	0.6227	0.2455	0.1965	0.4641	0.2346	1.0391	0.2092	0.3026	0.2291	0.0682	0.032	0.0235	0.015
ENSG00000060718	COL11A1	chr1:103342022-103574052	protein_coding	8265	2.0577	4.2061	4.5967	5.7905	17.764	18.7874	24.7241	21.7297	4.8523	3.5704	2.7962	1.3805	24.5043	0.4353	0.7695	0.7686	22.5187	3.3731	32.1749	30.9307
ENSG00000060749	QSER1	chr11:32914723-33014862	protein_coding	10537	36.1732	36.0573	24.2835	30.1459	13.9337	15.4901	9.7208	9.9559	17.4991	20.2707	13.4517	11.5155	13.0083	8.7029	8.1453	8.5767	2.5035	4.7429	3.0802	3.3848
ENSG00000060762	MPC1	chr6:166778406-166796486	protein_coding	1526	2.2479	2.0111	3.1775	2.7976	3.5918	3.7702	5.0522	5.8026	7.6398	6.5351	8.1966	14.6627	14.7305	20.3661	41.3708	40.4031	17.322	18.0857	23.8435	21.4113
ENSG00000060971	ACAA1	chr3:38144619-38178733	protein_coding	7106	1.7882	1.4018	2.8338	2.4618	1.0901	1.3025	2.1964	2.0879	1.8375	2.1396	2.5097	2.8267	1.7311	1.3112	2.3789	2.1982	1.5322	1.7648	3.6762	3.7338
ENSG00000060982	BCAT1	chr12:24964294-25102393	protein_coding	10372	57.9016	49.2422	93.9905	91.6318	71.2346	63.3924	90.7615	78.6266	40.6354	40.6663	45.0389	64.7777	51.428	80.1808	86.4603	86.6823	32.0395	27.409	83.3302	77.3047
ENSG00000061273	HDAC7	chr12:48176504-48226915	protein_coding	9936	5.9859	5.0583	4.3346	4.7069	2.9935	2.505	2.8982	2.9456	7.8004	8.3503	7.3613	5.4975	4.2741	1.739	3.7598	3.8493	1.7172	1.1073	3.1485	3.3201
ENSG00000061337	LZTS1	chr8:20103675-20161474	protein_coding	5706	1.7528	1.4812	1.3346	1.5414	0.9478	0.5809	0.4755	0.385	9.9216	10.4577	9.8729	10.1057	14.4105	23.1819	19.6819	17.8436	9.6543	5.5966	12.7122	13.5267
ENSG00000061455	PRDM6	chr5:122424815-122529960	protein_coding	9350	0.0207	0.0161	0.0336	0.0172	0.1251	0.1471	0.3333	0.6145	0.0798	0.0525	0.0209	0.0292	0.5247	0.0189	0.0036	0.014	0.0116	0.0299	0.0125	0.0084
ENSG00000061492	WNT8A	chr5:137419580-137428054	protein_coding	2089	0.9945	0.3853	3.6728	0.4302	14.938	14.9979	20.6904	11.3896	0.0446	0	0.0234	0.0164	0	0.0282	0.0481	0.0417	0	0	0	0
ENSG00000061656	SPAG4	chr20:34203813-34208971	protein_coding	2240	0.2157	0.6064	0.6749	0.5302	0.6525	0.7259	1.487	1.6597	0.2082	0.219	0.2617	0.2288	0.3596	0.0527	0.2242	0.0971	0.0242	0.1249	0.3796	0.3866
ENSG00000061676	NCKAP1	chr2:183773842-183903586	protein_coding	22520	12.6859	10.7499	17.9887	16.5438	8.1875	8.3363	11.0684	10.8249	8.5977	8.265	11.6703	11.9654	7.1237	5.6983	8.8114	8.3351	6.184	5.2809	14.1258	13.0031
ENSG00000061794	MRPS35	chr12:27863705-27909228	protein_coding	1979	19.6531	15.4309	32.5004	29.7305	22.8216	22.4992	34.4099	33.8138	22.1502	20.735	31.6264	33.0043	14.5035	18.267	18.1155	21.5247	11.1399	15.7597	26.4451	23.5254
ENSG00000061918	GUCY1B3	chr4:156680143-156728743	protein_coding	3724	0.4022	0.2972	0.6051	0.5603	1.5896	1.5785	1.486	1.1072	3.2809	4.2803	9.1841	8.6319	1.9072	0.4276	0.5843	0.8062	0.1164	2.7541	4.8104	4.7217
ENSG00000061936	SFSWAP	chr12:132195625-132284282	protein_coding	10157	5.7557	4.5817	4.0522	4.1336	6.6627	7.376	6.5775	6.0493	7.5113	6.9614	6.0034	4.8095	6.214	4.192	5.0094	4.5666	1.7812	2.2445	3.0396	2.8345
ENSG00000061938	TNK2	chr3:195590234-195638816	protein_coding	11297	2.8655	3.0906	1.4719	1.9548	1.9795	1.8157	1.5361	1.6334	2.4437	2.793	2.3658	1.261	4.1935	4.0613	3.9705	4.853	7.0771	1.7167	2.8938	3.1222
ENSG00000061987	MON2	chr12:62860596-62991363	protein_coding	13121	4.8495	4.2023	5.215	5.4602	6.4219	7.2111	8.8915	8.4588	7.8119	8.1051	9.7786	6.4932	7.3047	3.9462	10.2225	9.4211	2.1632	3.7698	6.5449	6.1545
ENSG00000062038	CDH3	chr16:68670091-68756519	protein_coding	5009	16.1661	25.4811	19.6679	28.3946	1.3714	1.3983	2.7351	3.522	0.6145	0.3917	0.7706	0.8661	1.5933	0.259	1.6573	1.0945	0.1947	0.2699	0.2751	0.3248
ENSG00000062096	ARSF	chrX:2959511-3030767	protein_coding	2215	0	0	0.0129	0	0.033	0	0	0.0153	0.0421	0	0	0.0771	0.0331	0.0266	0	0	0	0	0.0265	0.0237
ENSG00000062194	GPBP1	chr5:56469774-56560506	protein_coding	6493	23.3204	21.4006	34.5977	36.0385	18.1773	18.1551	25.9815	26.2493	21.46	20.4073	29.4901	25.1852	17.6708	15.0679	24.0499	26.0745	4.2629	7.8836	12.8963	12.1782
ENSG00000062282	DGAT2	chr11:75470556-75512579	protein_coding	7904	0.4034	0.9548	1.0681	1.1939	0.1294	0.2294	0.1937	0.1368	0.6136	0.786	0.5378	0.4538	0.1575	0.1045	0.0932	0.0165	0.1028	0.2123	0.0853	0.0963
ENSG00000062370	ZNF112	chr19:44830707-44871377	protein_coding	3848	1.6448	1.1636	3.3059	2.9029	3.5705	3.4453	4.3142	4.1807	5.6231	4.7796	6.6407	4.9625	3.8247	3.249	3.845	5.1336	0.9994	1.6356	2.9563	2.7622
ENSG00000062485	CS	chr12:56665482-56694176	protein_coding	6402	20.3992	18.7579	21.648	20.5918	29.9994	28.8554	32.4728	31.3314	26.0336	24.4895	29.5659	24.2252	17.6017	17.0231	22.1016	20.6137	10.94	20.1275	16.0244	16.7827
ENSG00000062524	LTK	chr15:41795835-41806085	protein_coding	3490	0.0554	0.0577	0.0409	0.046	0.0419	0.0717	0.1155	0.1743	0.2138	0.3279	0.322	0.9005	1.5945	2.2643	4.9779	3.7651	1.2106	3.0323	0.7309	0.7971
ENSG00000062582	MRPS24	chr7:43906156-43909492	protein_coding	2613	1.7751	1.6751	0.6768	0.5528	2.2095	1.8189	1.0897	1.3581	1.2493	1.658	0.8975	1.2681	0.8687	0.9479	0.8455	1.0158	1.1194	1.1418	1.1108	0.6629
ENSG00000062598	ELMO2	chr20:44994687-45061704	protein_coding	6714	5.3036	5.0054	5.9178	6.4589	3.6029	3.5208	4.4131	4.1176	5.8344	5.6126	6.3239	7.6116	6.1726	5.9992	5.4593	5.0095	4.6551	5.1591	7.2403	6.6646
ENSG00000062650	WAPAL	chr10:88195012-88281572	protein_coding	7280	17.9456	16.309	26.5557	24.0562	16.0818	15.6083	22.4939	22.1721	16.6675	14.8102	17.9531	18.9714	12.5621	12.1186	17.5002	17.1414	5.8557	5.9235	12.6943	12.9886
ENSG00000062716	VMP1	chr17:57784552-57919616	protein_coding	6916	13.7274	10.6714	16.5501	19.6044	4.8713	5.3349	8.114	8.2048	10.276	13.5449	14.094	18.4585	11.5188	10.0789	13.9878	16.3009	21.4913	29.7271	61.4618	58.4227
ENSG00000062725	APPBP2	chr17:58520519-58603580	protein_coding	9866	2.4388	2.1162	4.1515	3.5267	4.3333	4.3546	6.2106	5.7824	9.3588	8.277	12.6333	10.9864	8.4753	8.3145	12.0412	12.7984	4.8973	7.2769	12.0772	11.1057
ENSG00000062822	POLD1	chr19:50887460-50921273	protein_coding	4856	18.5857	19.9745	10.2672	12.1691	20.2567	19.2657	13.8352	14.9983	14.7505	13.5508	8.2908	11.8465	4.4029	2.696	2.068	2.715	1.0262	1.0944	1.5698	1.6051
ENSG00000063015	SEZ6	chr17:27281918-27333458	protein_coding	5103	2.509	1.0845	0.7154	0.8555	0	0	0	0.0066	0	0.032	0.0479	0.0937	0.1435	0.0347	0.0525	0.0256	0.1804	0	0.0919	0.0617
ENSG00000063046	EIF4B	chr12:53399941-53435993	protein_coding	6147	143.184	146.304	192.651	201.077	224.14	217.275	303.986	299.294	153.896	152.833	209.887	153.843	104.715	83.4562	122.874	127.419	35.7235	67.3849	103.254	101.266
ENSG00000063127	SLC6A16	chr19:49792894-49828482	protein_coding	3599	0.2685	0.3774	0.0793	0.214	0.7107	0.7819	0.3433	0.4132	0.9588	0.8404	0.5838	0.2942	0.8952	0.4096	0.8557	0.9188	0.2258	0.7513	0.277	0.2698
ENSG00000063169	GLTSCR1	chr19:48111452-48206533	protein_coding	7147	1.467	1.2882	0.3672	0.3548	0.5113	0.8138	0.3044	0.2506	0.9265	0.6634	0.2529	0.1769	0.7581	0.4043	0.1827	0.2374	0.2349	0.2087	0.1231	0.1506
ENSG00000063176	SPHK2	chr19:49122547-49133974	protein_coding	6008	3.4017	2.9727	2.4734	2.0943	1.0339	1.0929	0.6662	0.6975	2.4838	2.3129	1.3418	1.7513	1.8159	2.2969	0.8914	1.405	1.0909	0.9467	1.2005	1.3847
ENSG00000063177	RPL18	chr19:49118584-49122793	protein_coding	4209	94.5638	86.0361	103.803	102.885	124.961	129.218	171.165	176.756	122.427	117.477	150.501	160.716	91.3994	114.779	134.436	148.242	32.3662	56.5328	88.6333	89.7245
ENSG00000063180	CA11	chr19:49141198-49149569	protein_coding	2075	20.0478	16.6081	34.4332	22.4458	7.0439	7.1728	8.855	8.5836	4.27	3.7818	5.1803	8.4785	4.552	0.5116	0.613	0.7968	0.3655	2.6062	3.2357	3.3516
ENSG00000063241	ISOC2	chr19:55964351-55973710	protein_coding	4408	7.5848	8.6284	7.9006	7.8936	4.3603	4.2135	4.1379	4.6233	3.7027	4.0241	2.9484	4.6343	2.7906	3.7728	3.0983	3.2969	4.989	5.0448	6.4651	7.3647
ENSG00000063244	U2AF2	chr19:56165511-56186081	protein_coding	4115	37.5014	28.2417	38.5383	35.9831	25.1653	25.9263	28.4556	26.7417	28.7619	28.2672	25.8723	36.8754	17.8291	17.0111	17.2047	17.0766	7.2793	9.8337	19.3728	20.1278
ENSG00000063245	EPN1	chr19:56186591-56221224	protein_coding	3849	18.4649	18.9003	6.3136	6.3213	20.4489	18.6195	7.8027	8.3416	14.248	13.5069	4.9761	5.7955	12.1558	10.909	4.531	5.1662	10.8643	7.8608	5.2864	6.9752
ENSG00000063322	MED29	chr19:39881942-39891277	protein_coding	3835	8.4284	7.5825	8.9323	8.2443	7.6034	7.4359	7.7541	7.8786	6.4934	6.4158	5.5675	7.3933	6.3006	5.2284	5.499	4.4929	5.1978	4.2547	7.0183	7.2402
ENSG00000063438	AHRR	chr5:304290-438406	protein_coding	7678	0.1825	0.1507	0.1226	0.1254	0.1333	0.1385	0.077	0.1365	0.2187	0.1703	0.0955	0.1068	0.4864	0.1075	0.776	0.306	4.1341	1.0808	3.8339	4.2623
ENSG00000063515	GSC2	chr22:19136088-19137796	protein_coding	1033	0.0468	0.0487	0	0	0	0	0	0	0	0	0	0	0.0709	0	0	0	0	0	0	0
ENSG00000063587	ZNF275	chrX:152599612-152625568	protein_coding	8148	2.3897	1.6671	1.0712	1.3591	2.4845	1.8113	1.3649	1.4061	3.0219	3.6016	2.6085	1.916	4.4932	4.9434	3.492	2.2482	2.2204	1.5334	1.7452	1.91
ENSG00000063601	MTMR1	chrX:149861434-149933576	protein_coding	6332	3.3802	3.2496	4.4775	3.878	2.4006	2.637	2.9357	3.069	4.6839	4.6087	5.3396	5.2169	4.6832	5.5695	5.5244	6.1913	2.2413	4.1966	4.8618	4.7249
ENSG00000063660	GPC1	chr2:241375087-241407493	protein_coding	6514	7.3948	6.3562	3.7262	4.1491	6.6417	7.0754	4.8868	4.7473	28.1632	28.5609	21.6169	17.243	26.7411	34.3752	30.7863	39.4432	40.5045	45.0308	42.7591	48.5799
ENSG00000063761	ADCK1	chr14:78266425-78401355	protein_coding	5317	1.3994	1.7599	2.1779	2.288	1.0171	1.1409	1.258	1.2077	0.9998	1.276	1.3141	1.2785	0.9364	0.9871	0.9758	1.1539	0.652	0.719	0.59	0.6417
ENSG00000063854	HAGH	chr16:1845620-1877195	protein_coding	5052	2.2283	2.3402	2.072	3.1196	1.3308	1.176	1.0369	1.2777	2.4923	2.961	2.2631	2.7047	3.0581	3.7471	4.9098	4.9695	4.7605	3.7096	4.579	4.4155
ENSG00000063978	RNF4	chr4:2463946-2627047	protein_coding	7276	10.4917	9.3552	11.8151	11.5627	6.84	6.4204	7.838	7.3019	8.8831	8.19	8.5618	9.2257	6.7122	5.0981	7.8992	6.3628	3.8935	4.4979	8.8087	8.4402
ENSG00000064012	CASP8	chr2:202098165-202152434	protein_coding	6808	0.6032	0.3843	0.6242	0.6836	0.0966	0.0919	0.1184	0.1589	0.2329	0.3002	0.2584	0.3312	0.2151	0.0173	0.0197	0.0192	0.6763	0.9587	2.4289	2.4864
ENSG00000064042	LIMCH1	chr4:41361623-41702061	protein_coding	10862	3.8787	4.0249	4.1253	4.7193	0.9554	1.0709	1.375	1.5402	3.5462	6.5924	6.7203	4.8967	8.3251	6.868	8.5796	10.1828	30.649	6.5882	8.7186	8.3187
ENSG00000064102	ASUN	chr12:27058113-27091259	protein_coding	3345	17.8816	13.2955	24.08	22.3586	14.5287	14.9377	21.8355	19.2879	10.9856	11.8276	15.264	14.1239	7.3768	8.8327	6.7148	7.7917	7.5461	8.2786	13.9102	13.4476
ENSG00000064115	TM7SF3	chr12:27126127-27167367	protein_coding	3888	12.6628	12.6161	15.6404	17.8077	6.5976	6.7233	7.6346	6.928	4.3659	5.9078	5.4037	6.124	4.2185	2.4572	3.771	3.5588	8.0665	5.5517	10.9796	10.341
ENSG00000064195	DLX3	chr17:48067368-48072588	protein_coding	2715	0.1602	0.4447	0.4307	0.1773	0.2423	0.1843	0.1781	0.0996	0	0.0301	0	0	0.0809	0.0217	0.0863	0.0641	0.2594	0	0.054	0.0097
ENSG00000064199	SPA17	chr11:124543693-124567414	protein_coding	5205	1.0303	1.0535	1.5891	1.2395	2.443	2.3068	2.8488	2.9024	1.7202	1.3506	1.0701	1.0698	0.8722	0.5892	0.238	0.4263	0.3746	0.4657	1.0365	1.0286
ENSG00000064201	TSPAN32	chr11:2323226-2339430	protein_coding	3793	0	0	0	0	0.1734	0.0659	0.1346	0.0891	0.0738	0.0216	0.0515	0.027	0.0193	0	0	0	0.2285	0.0246	0.0309	0.0277
ENSG00000064205	WISP2	chr20:43343484-43357150	protein_coding	4981	0	0	0	0	0	0	0	0	0	0	0	0	0.0441	0	0.0067	0.0262	0	0.0187	0.0118	0.0474
ENSG00000064218	DMRT3	chr9:976963-991731	protein_coding	2387	0	0.0422	0.0239	0.0269	0	0	0.0113	0	1.1722	1.3698	2.2516	1.746	0.7362	0.1729	0.3927	0.3828	0	0.0195	0.0123	0.022
ENSG00000064225	ST3GAL6	chr3:98451079-98540045	protein_coding	6288	1.1833	1.1041	2.2816	1.9908	7.1012	6.5142	12.8077	14.1411	0.4005	0.468	0.4351	0.2988	0.5007	0.0563	0.0958	0.1384	0.2498	0.0667	0.0653	0.1002
ENSG00000064270	ATP2C2	chr16:84402132-84497793	protein_coding	6693	0.2166	0.3608	0.6179	0.5899	0	0	0.004	0	0.0697	0.1343	0.1533	0.3062	0.1532	0.9164	0.075	0.286	0	0	0	0
ENSG00000064300	NGFR	chr17:47572654-47592379	protein_coding	4150	8.1146	4.1581	3.6907	3.8209	0.1585	0.1055	0.1942	0.0489	60.6793	71.4999	48.4472	33.0248	15.9321	6.9062	7.8724	14.4687	3.1456	3.7071	6.7328	7.2155
ENSG00000064309	CDON	chr11:125825690-125933230	protein_coding	10600	3.7193	3.1752	3.1859	3.2462	0.8894	1.1504	1.2874	1.3487	39.8142	54.536	41.6456	28.5436	18.3327	13.2745	13.5001	15.0031	5.7488	3.0831	3.1643	3.2285
ENSG00000064313	TAF2	chr8:120743014-120845103	protein_coding	6547	8.5457	7.7227	11.7366	11.6735	9.0193	8.6158	10.988	11.4136	8.9605	8.5151	10.351	10.9208	7.2918	7.8456	5.4963	5.988	2.8461	4.3365	8.9162	8.7507
ENSG00000064393	HIPK2	chr7:139246315-139477577	protein_coding	15220	6.3267	5.5896	2.4306	2.9968	6.5926	6.8248	3.447	3.0666	6.7407	7.7338	4.0609	3.0637	7.2932	3.3787	2.2719	2.0269	6.8118	6.3068	3.4578	4.0107
ENSG00000064419	TNPO3	chr7:128594947-128695198	protein_coding	3933	35.3548	31.5952	45.6882	44.9608	24.6389	23.31	33.2079	30.5743	16.1254	15.1929	20.9823	20.1682	12.4175	10.691	16.0348	15.4109	6.776	9.5776	16.281	16.5684
ENSG00000064489	MEF2BNB-MEF2B	chr19:19256375-19302967	protein_coding	1931	0	0.0261	0.0295	0	0.0378	0	0	0	0	0	0	0	0	0	0.0347	0.0451	0.0281	0	0	0.0272
ENSG00000064490	RFXANK	chr19:19303007-19312678	protein_coding	2533	7.706	6.9714	11.3504	10.784	10.1557	9.8754	13.9457	14.7435	12.924	11.6175	12.3643	19.2449	9.9439	14.5977	12.8451	14.79	4.7473	6.1656	11.9337	11.4073
ENSG00000064545	TMEM161A	chr19:19229977-19249322	protein_coding	3281	6.8916	6.3634	6.1461	6.7112	7.9963	7.9671	9.1044	8.9925	5.9979	6.7018	6.3289	5.7056	4.1955	3.7386	4.1524	4.7211	2.8231	2.8844	3.7978	4.3433
ENSG00000064547	LPAR2	chr19:19734476-19739739	protein_coding	2980	6.8257	6.9386	5.9916	6.172	8.1174	8.1213	7.0763	7.0542	6.2282	7.3513	6.3615	4.2644	6.0444	0.8707	1.9882	1.9857	0.4362	0.3442	0.2755	0.3082
ENSG00000064601	CTSA	chr20:44518782-44527459	protein_coding	5856	3.7787	4.7337	4.5297	4.5879	2.7954	2.7765	2.6606	2.9203	3.249	3.2105	2.2277	3.0976	2.3507	1.6012	1.229	1.1145	14.9754	9.0596	13.5431	14.4037
ENSG00000064607	SUGP2	chr19:19101696-19144832	protein_coding	7744	19.5281	22.4521	22.6294	24.6044	21.3372	23.4996	25.4232	25.3563	22.0159	22.7789	25.66	18.6155	17.908	14.5757	16.9444	20.1149	8.3656	10.2703	16.4996	16.416
ENSG00000064651	SLC12A2	chr5:127419457-127525380	protein_coding	10664	3.7469	2.5853	4.0013	4.0093	5.6537	5.8173	7.7006	8.3129	10.8537	8.93	9.4154	10.9235	6.2138	7.0619	8.5819	7.1158	8.4826	12.2844	13.8623	13.1294
ENSG00000064652	SNX24	chr5:122179133-122365049	protein_coding	3550	3.4705	3.3162	6.2026	5.8049	1.6469	1.2683	2.0052	2.6847	2.1806	1.8191	3.427	2.4442	2.4957	1.7775	1.6596	1.434	1.5106	1.7072	2.1969	2.4544
ENSG00000064655	EYA2	chr20:45523262-45817492	protein_coding	3618	0.7078	0.7509	0.6701	0.6565	0.2626	0.1556	0.1485	0.1775	12.8892	9.3084	11.2763	6.1183	3.4404	4.4499	4.1357	5.1713	0.0299	0.0387	0.2674	0.2321
ENSG00000064666	CNN2	chr19:1026297-1039068	protein_coding	3928	76.47	64.0905	70.6745	61.1817	39.4241	35.5985	37.839	35.3885	47.8679	49.3825	43.7345	54.5285	31.3722	31.4682	29.9033	29.9415	27.4557	21.1022	68.1926	72.231
ENSG00000064687	ABCA7	chr19:1040101-1065571	protein_coding	8365	2.4259	2.8748	1.2377	1.7383	0.961	1.0616	0.8253	0.9656	2.0181	3.1466	1.7055	0.9556	1.8469	1.276	2.2169	3.0117	1.8649	1.0032	0.8377	0.7624
ENSG00000064692	SNCAIP	chr5:121647048-121799914	protein_coding	7325	1.1609	0.9203	1.0241	1.1875	0.6186	0.5208	0.7298	0.872	1.8462	2.243	1.8877	1.539	3.3187	0.5072	0.1691	0.1604	0	0.6428	0.2682	0.3225
ENSG00000064703	DDX20	chr1:112297866-112310638	protein_coding	6019	6.8471	5.4079	8.5487	7.5567	5.5852	5.6313	6.8775	7.3388	7.6237	6.3422	7.6305	8.6438	4.9024	6.1236	5.3	5.588	2.5378	3.834	4.7493	4.5477
ENSG00000064726	BTBD1	chr15:83685173-83736106	protein_coding	4169	12.2729	12.1761	21.503	22.2665	13.1472	12.1952	18.6345	18.8399	14.8546	14.7054	22.1502	23.992	15.3677	17.4415	28.7768	30.1728	22.6724	29.1191	44.0245	40.9869
ENSG00000064763	FAR2	chr12:29302035-29493913	protein_coding	5411	3.0448	3.2542	5.5769	5.505	1.3236	1.1904	1.4099	0.9556	0.293	0.4079	0.1806	0.7892	0.433	0.2398	0.0619	0.0724	0.2403	0.5945	1.9669	2.0467
ENSG00000064787	BCAS1	chr20:52553315-52687304	protein_coding	9024	0.0214	0.0279	0.019	0.0498	0.0081	0.0208	0.0298	0.0637	0.0103	0.0181	0.0433	0.0379	0.0325	0.0327	0.0074	0	8.2055	13.6129	2.8786	2.7221
ENSG00000064835	POU1F1	chr3:87308553-87325737	protein_coding	1569	0	0	0	0	0	0	0	0	0	0	0	0	0	0	0.0213	0	0	0	0.0187	0
ENSG00000064886	CHI3L2	chr1:111743392-111786062	protein_coding	3295	0	0	0	0	0.0222	0.038	0.0082	0.0103	0	0	0	0.0311	0.0222	0	0.0305	0.0132	0.0658	0.283	0.1068	0.0876
ENSG00000064932	SBNO2	chr19:1107635-1174282	protein_coding	6476	5.6477	5.4147	2.277	2.9194	3.8933	4.3744	2.3685	2.4267	3.6293	3.7488	2.0144	1.9676	3.6294	3.2237	2.2485	2.6875	2.4591	1.8285	3.0152	3.3798
ENSG00000064933	PMS1	chr2:190649106-190742355	protein_coding	5152	12.829	9.7064	18.275	18.504	10.1706	11.0337	14.5785	14.8779	10.3549	10.4082	14.1589	12.0478	6.6228	6.0552	8.2515	9.8643	2.4076	4.3977	7.068	6.51
ENSG00000064961	HMG20B	chr19:3572774-3579086	protein_coding	3857	11.8251	12.4045	9.0441	9.4872	11.9748	12.4359	8.3089	7.4744	10.5913	11.1053	6.5619	6.8995	6.7582	5.1068	2.6557	3.1249	4.7749	5.0161	6.0812	6.4572
ENSG00000064989	CALCRL	chr2:188207855-188313187	protein_coding	6144	0.1415	0.2293	0.3389	0.4441	0.4996	0.458	0.6252	0.4181	3.8861	3.6321	8.4374	3.1192	19.5683	13.1595	38.1158	43.1357	1.3577	1.1761	1.2741	1.2558
ENSG00000064995	TAF11	chr6:34845554-34855866	protein_coding	1580	17.7665	14.838	30.6887	27.5275	17.8076	17.3756	28.1379	27.5294	21.1915	19.6595	27.9859	32.669	16.6368	19.3715	26.419	26.2168	12.2732	15.6382	27.8718	24.1012
ENSG00000064999	ANKS1A	chr6:34857041-35059179	protein_coding	6766	7.0623	6.8928	6.3318	6.6654	5.0333	5.4809	4.8834	5.2299	6.9888	9.1577	8.5428	5.7709	12.4018	16.3688	15.8959	18.0256	6.6207	9.7773	8.4716	9.0415
ENSG00000065000	AP3D1	chr19:2100987-2164464	protein_coding	8618	22.5821	20.2218	14.4664	14.876	18.0454	16.9366	13.2818	13.812	16.4282	15.5081	10.9137	12.2246	12.2346	11.0241	9.8814	10.6076	11.5964	8.4822	12.2747	12.5586
ENSG00000065029	ZNF76	chr6:35226685-35263762	protein_coding	6789	2.6189	2.2157	3.2014	3.1914	1.7977	1.8423	2.2396	1.7374	2.6651	2.7813	2.6772	2.6165	2.7502	2.6494	2.1497	2.1983	1.3165	1.2017	1.8484	1.8516
ENSG00000065054	SLC9A3R2	chr16:2075356-2089027	protein_coding	3550	1.3202	1.2471	0.707	0.6781	0.5558	0.4932	0.4313	0.5331	4.5976	4.7664	2.6976	2.5885	1.65	0.3655	0.9241	1.0908	1.9225	1.6284	1.7674	1.8186
ENSG00000065057	NTHL1	chr16:2089815-2097867	protein_coding	1658	12.2099	9.7402	12.9366	11.8869	9.6971	9.0523	10.515	12.4343	8.7754	9.1701	8.487	10.6521	2.6939	2.4542	1.7161	2.1782	1.3068	2.615	2.5287	2.8175
ENSG00000065060	UHRF1BP1	chr6:34759856-34850915	protein_coding	9844	7.313	5.8977	5.8528	5.8562	11.6481	8.5952	7.226	6.6914	5.173	4.8826	4.9931	4.8965	5.7124	5.4636	5.4781	4.7737	2.201	2.5621	2.8622	2.8206
ENSG00000065135	GNAI3	chr1:110091232-110136975	protein_coding	3206	34.2394	26.3002	56.529	47.9675	37.2242	36.2032	58.9121	56.4192	38.3422	33.3496	48.0973	56.068	21.3084	18.6888	27.533	27.4014	10.1373	11.8512	34.6782	33.3411
ENSG00000065150	IPO5	chr13:98605911-98676551	protein_coding	9671	74.6881	64.9167	113.653	106.482	80.3351	77.6288	119.826	114.062	50.2063	48.0514	71.1999	63.4965	21.2446	17.9583	32.5948	32.5647	11.9412	21.7503	31.0442	29.5546
ENSG00000065154	OAT	chr10:126085871-126107545	protein_coding	3388	14.2321	16.9578	29.6506	31.1321	12.3383	11.7579	20.8527	20.9384	10.8187	10.9295	14.8972	18.2702	6.9806	4.0035	7.5188	7.9496	11.2874	7.8984	34.0788	32.5028
ENSG00000065183	WDR3	chr1:118472342-118509165	protein_coding	10275	8.779	6.1008	12.5471	10.6089	8.286	7.6322	13.5111	12.703	8.3418	8.0111	9.4628	9.9474	4.7745	5.8141	6.1898	5.7464	2.5621	4.1833	6.4545	6.0457
ENSG00000065243	PKN2	chr1:89149904-89301938	protein_coding	7014	12.7297	9.8266	14.0457	14.9052	12.3364	12.1881	14.4463	15.2938	13.1509	11.456	14.6146	13.1549	9.792	8.2649	10.7332	10.8188	3.6837	5.5433	8.9663	8.7555
ENSG00000065268	WDR18	chr19:983173-994569	protein_coding	2474	11.9713	12.3028	8.1163	8.1219	14.947	14.8378	11.4987	11.3521	10.3294	12.4893	7.8009	10.3836	6.6887	8.0569	3.5043	4.9772	3.5688	4.6544	4.93	5.654
ENSG00000065308	TRAM2	chr6:52362199-52441713	protein_coding	6908	6.3786	4.9231	2.9976	3.1086	5.7127	5.1148	2.8854	2.5587	7.0611	8.3186	4.5196	5.2369	6.4868	6.6929	3.8184	3.6091	14.0592	10.6291	12.5969	13.4563
ENSG00000065320	NTN1	chr17:8924858-9147317	protein_coding	6431	0.7964	0.5476	0.5455	0.4792	0.1136	0.0778	0.0501	0.021	1.5373	3.1777	3.9583	3.2456	2.4707	0.431	0.2238	0.3992	0.0337	0.2537	0.0638	0.0694
ENSG00000065325	GLP2R	chr17:9725522-9795419	protein_coding	6052	0	0	0.0047	0	0.0121	0.0207	0.0089	0.0112	0	0	0	0.0056	0.0121	0	0	0.0072	0	0	0.0194	0.0087
ENSG00000065328	MCM10	chr10:13203553-13253104	protein_coding	5454	14.7496	10.6725	17.0539	15.3607	10.5722	8.8977	9.9984	10.6521	9.8841	9.0225	8.4388	13.3474	2.4031	0.4866	0.3314	0.5425	0.0099	0.1966	0.8762	0.9287
ENSG00000065357	DGKA	chr12:56321102-56347811	protein_coding	10215	1.2723	1.4578	1.2314	1.5146	1.1948	1.2428	1.186	1.1679	0.7213	0.9283	0.971	0.602	1.1899	0.3175	0.5112	0.5921	1.2832	0.753	1.7968	1.914
ENSG00000065361	ERBB3	chr12:56473640-56497289	protein_coding	8651	5.5793	6.8215	7.1908	8.5302	0.4815	0.5855	0.4627	0.4258	23.384	23.9151	27.7929	18.2907	41.1764	57.33	58.1605	58.3886	7.3258	10.2982	8.8151	8.5124
ENSG00000065371	ROPN1	chr3:123687367-123711025	protein_coding	4395	0	0.0114	0	0.0365	0	0	0	0	0	0	0	0.0078	0	0.0134	0	0.0198	0	0	0	0
ENSG00000065413	ANKRD44	chr2:197831740-198175897	protein_coding	9228	0.1257	0.1308	0.1391	0.1217	0.2455	0.2236	0.2678	0.3699	0.9703	1.5945	2.4885	2.0767	10.2832	11.7141	17.9376	17.5166	2.8058	6.0826	5.3885	5.5542
ENSG00000065427	KARS	chr16:75661621-75682541	protein_coding	3815	42.8819	34.7483	59.9234	53.8481	54.5758	55.6679	90.249	90.0685	34.9107	32.7612	41.905	47.4132	22.206	28.6594	29.7185	30.6231	16.2003	22.9493	36.6817	34.9736
ENSG00000065457	ADAT1	chr16:75630878-75657198	protein_coding	4486	4.6635	4.2167	3.9166	3.778	4.4474	4.2797	5.1318	6.1325	3.8463	4.2092	2.6031	3.7009	3.5582	2.9184	2.5594	2.774	2.0648	2.0888	2.8234	3.1006
ENSG00000065485	PDIA5	chr3:122785908-122944074	protein_coding	4030	3.7165	4.4317	4.5225	5.1692	2.2305	2.188	3.3328	3.2371	1.944	2.1095	3.1401	2.4667	2.3256	0.4097	1.1463	1.3604	3.0242	1.6195	8.4757	8.6351
ENSG00000065491	TBC1D22B	chr6:37225547-37300746	protein_coding	3462	6.4615	6.0743	7.0359	7.167	3.673	4.1004	4.5004	4.7347	3.8794	3.7778	3.5	3.3944	2.8552	2.4529	3.0361	2.4131	1.3299	1.5755	2.5745	2.7442
ENSG00000065518	NDUFB4	chr3:120315155-120321347	protein_coding	1889	26.6768	25.2212	53.8439	48.1902	24.8761	25.9216	48.6061	47.4836	17.8732	19.2564	33.0039	24.739	14.8456	14.9852	24.0644	26.0053	14.8536	20.1632	35.3414	35.2883
ENSG00000065526	SPEN	chr1:16174358-16266955	protein_coding	13294	10.6159	10.2707	4.7523	7.3981	8.999	9.8033	4.7243	4.9167	10.6428	12.5067	5.5681	4.651	7.05	3.7396	3.1525	2.8442	2.2451	2.4302	1.2196	1.4391
ENSG00000065534	MYLK	chr3:123328895-123603178	protein_coding	22166	1.7786	1.675	1.418	1.7898	1.8958	1.9749	1.6482	1.4607	0.324	0.2655	0.3593	0.3683	0.4096	0.1117	0.0589	0.1021	6.4489	0.816	4.1441	4.0965
ENSG00000065548	ZC3H15	chr2:187350882-187374090	protein_coding	3125	25.2011	19.4958	38.7632	37.1418	26.7534	26.7955	39.456	37.1277	25.3685	23.6726	28.8934	36.4455	19.213	24.0609	29.6391	27.8888	14.9934	19.8562	29.5444	27.7136
ENSG00000065559	MAP2K4	chr17:11924140-12047147	protein_coding	5714	9.8338	8.2675	13.2429	12.2968	7.3669	6.6323	10.0512	9.6469	9.8098	9.6849	11.0391	11.4248	9.4825	8.8965	12.4722	11.7953	5.3181	6.3476	9.6927	9.1996
ENSG00000065600	TMEM206	chr1:212537272-212588243	protein_coding	2914	4.9078	3.5911	5.3247	5.4415	5.2917	4.5067	5.7431	6.1586	6.3372	7.7142	8.2829	7.4558	4.9752	4.513	5.0774	6.3758	1.6916	2.5918	4.1655	4.1158
ENSG00000065609	SNAP91	chr6:84262598-84419410	protein_coding	6657	0.0944	0.1587	0.1414	0.1398	0.1756	0.2255	0.234	0.1726	0.4904	0.6754	0.2495	0.3489	1.5509	1.1251	0.533	0.268	0.4231	1.2746	0.1321	0.1064
ENSG00000065613	SLK	chr10:105726958-105788991	protein_coding	7974	13.0452	10.4354	14.576	15.7957	17.4407	17.2065	22.773	22.0183	16.9012	14.331	20.6981	19.5823	13.9481	11.1896	20.557	17.8049	9.2044	11.4357	15.5715	15.1691
ENSG00000065615	CYB5R4	chr6:84569361-84677143	protein_coding	9635	1.2235	0.9608	1.7969	1.6557	1.4108	1.402	1.9962	2.1748	1.5488	1.4083	1.3793	2.0989	1.1171	1.7322	1.0666	0.9348	0.8826	1.8532	1.8867	1.7596
ENSG00000065618	COL17A1	chr10:105791043-105845760	protein_coding	6426	0.4361	0.3993	0.4261	0.4196	0.2161	0.2336	0.2132	0.1104	0	0	0	0.0319	0.0684	0.0184	0	0.0135	0.0337	0.058	0.0183	0.0408
ENSG00000065621	GSTO2	chr10:106028630-106064703	protein_coding	10344	1.121	1.0992	0.8438	1.2195	0.2473	0.133	0.2026	0.281	0.0992	0.1422	0.1464	0.0991	0.177	0.0399	0.11	0.244	0.0262	0.0541	0.0709	0.0457
ENSG00000065665	SEC61A2	chr10:12171635-12211960	protein_coding	3916	3.8864	3.0962	4.3774	3.541	2.6127	3.114	2.6959	2.4942	3.5011	3.9243	4.1423	3.594	3.4404	3.027	4.3509	4.4667	1.7844	2.5715	2.9274	2.4126
ENSG00000065675	PRKCQ	chr10:6469104-6622263	protein_coding	3285	5.4566	5.8043	6.2515	8.413	2.2024	2.3035	2.9766	2.2428	2.5836	2.1649	1.7848	3.1197	2.2066	3.4289	2.5475	3.0464	1.7149	2.2139	0.4016	0.6471
ENSG00000065717	TLE2	chr19:2997635-3047633	protein_coding	4038	0.4786	0.9344	0.7275	0.8903	0	0	0	0	1.3396	1.9838	1.8755	1.785	1.4144	0.5112	0.7046	1.2176	0.0805	0.3579	0.2396	0.364
ENSG00000065802	ASB1	chr2:239335382-239360891	protein_coding	7410	4.988	4.5353	7.1826	6.4197	4.231	4.4898	7.5767	7.1197	4.8458	5.4716	7.0355	6.8368	6.8181	7.672	15.9916	13.1414	9.2837	13.363	16.1473	15.842
ENSG00000065809	FAM107B	chr10:14560555-14816896	protein_coding	7019	3.2008	2.4083	5.3599	4.3216	3.7899	3.0916	4.539	5.388	4.5311	3.4821	4.5664	6.6969	2.7748	2.0669	1.8456	2.0643	2.0219	1.6738	4.4361	4.2251
ENSG00000065833	ME1	chr6:83920107-84140797	protein_coding	3378	3.0179	1.7574	3.0397	2.6986	3.7211	2.9991	3.8409	3.2216	1.4909	0.8227	0.6075	0.9101	0.9537	0.7507	0.763	0.4637	6.5744	3.8505	11.4395	10.597
ENSG00000065882	TBC1D1	chr4:37892707-38140796	protein_coding	9027	11.5449	12.7403	14.2344	14.7212	10.4031	10.1837	11.9152	12.3251	5.3416	5.8497	7.6101	6.7966	17.5285	19.1742	31.7607	29.2725	7.0986	7.6847	14.3981	14.4404
ENSG00000065883	CDK13	chr7:39989635-40136733	protein_coding	8921	10.5989	9.807	9.7643	9.8048	9.6338	9.3513	8.9402	9.1718	13.3716	13.9459	11.6165	10.8483	12.5823	9.9952	14.7877	14.2029	3.9528	5.0847	6.8064	6.6338
ENSG00000065911	MTHFD2	chr2:74425688-74444692	protein_coding	4870	31.9057	26.8178	50.7724	51.0478	72.5855	48.4239	66.4343	62.8814	15.3784	16.8856	18.5404	38.2853	11.5619	15.3547	10.2621	10.364	4.9718	6.9403	19.9816	19.6856
ENSG00000065923	SLC9A7	chrX:46464752-46618490	protein_coding	3838	3.8773	4.4044	3.6118	4.5497	0.1142	0.1141	0.175	0.3082	1.3608	1.4057	1.4385	0.7833	2.3084	2.3048	3.384	2.6868	18.5025	5.2596	11.2678	10.6535
ENSG00000065970	FOXJ2	chr12:8185298-8208099	protein_coding	6296	2.118	1.8938	0.7928	1.1522	2.3679	2.5726	1.3355	1.0682	3.733	4.2845	2.0875	1.7471	3.2098	2.2199	1.5578	1.3753	1.8583	1.5994	0.9407	1.1505
ENSG00000065978	YBX1	chr1:43148097-43168020	protein_coding	1930	370.949	328.105	407.945	377.066	316.67	343.463	345.361	334.395	332.038	310.536	294.269	384.512	237.113	323.678	278.545	291.141	161.546	339.405	292.691	295.809
ENSG00000065989	PDE4A	chr19:10527448-10580305	protein_coding	6644	1.1126	0.8784	0.5323	0.6522	0.825	0.7248	0.5377	0.5087	0.8423	0.7751	0.4339	0.3651	0.4629	0.2042	0.2519	0.3471	0.0326	0.1474	0.1236	0.1501
ENSG00000066027	PPP2R5A	chr1:212458878-212535200	protein_coding	3820	8.3982	9.2717	12.5215	13.6629	6.8872	6.843	7.8971	7.3875	5.2249	5.1356	5.6917	6.1078	3.201	3.103	6.2566	6.0141	3.389	4.3202	4.843	4.4793
ENSG00000066032	CTNNA2	chr2:79412356-80875905	protein_coding	7538	1.7818	1.8954	2.6562	2.3548	0.669	0.5144	0.4847	0.3497	0.2598	0.2277	0.3759	0.2855	1.4765	0.0861	0.0666	0.1097	0.0503	0.1794	0.0467	0.0905
ENSG00000066044	ELAVL1	chr19:8023462-8070543	protein_coding	6956	11.8287	8.9394	13.8266	11.5409	10.7583	12.3257	15.5786	13.7645	13.5421	12.5857	12.9734	15.0472	10.1262	8.6899	13.7774	13.1922	2.8968	4.162	7.6333	7.3797
ENSG00000066056	TIE1	chr1:43766663-43788779	protein_coding	6694	0.7218	0.3457	0.2429	0.2541	0.2402	0.1308	0.1605	0.1262	0.0139	0	0	0.0204	0.1094	0	0.01	0.013	0.0081	0	0.092	0.1255
ENSG00000066084	DIP2B	chr12:50898767-51142450	protein_coding	10361	7.8341	6.5454	8.0356	7.5282	7.5683	7.7801	8.4755	7.3067	12.4493	10.7691	11.9543	11.4177	6.9256	7.4677	6.2321	6.2993	5.4371	8.6616	8.5317	8.0776
ENSG00000066117	SMARCD1	chr12:50478754-50494495	protein_coding	5136	27.1772	23.94	21.5751	20.799	26.8076	25.0705	20.0477	17.8591	15.3265	12.0322	9.437	13.0098	10.3501	6.6138	4.8425	5.5236	2.5312	3.6127	3.7448	3.7506
ENSG00000066135	KDM4A	chr1:44115828-44171186	protein_coding	5172	17.4035	16.6433	22.7375	21.157	9.9052	8.476	9.8528	9.9652	15.2018	15.1884	14.7466	17.087	10.5329	10.2279	7.2423	8.8755	5.5298	6.0663	11.1903	11.072
ENSG00000066136	NFYC	chr1:41157319-41237275	protein_coding	5990	4.0733	4.191	4.8712	3.9172	4.3556	4.1343	4.1841	3.7746	5.8856	6.5776	6.3215	5.6231	6.3686	8.0337	4.8954	6.356	3.6171	3.4167	3.7493	3.8687
ENSG00000066185	ZMYND12	chr1:42895999-42921938	protein_coding	2195	0.1981	0.1604	0.3249	0.4241	0.2996	0.2279	0.2448	0.2925	0.2549	0.0745	0.1558	0.1089	0.2335	0.0537	0.4575	0.4361	0.1481	0.0637	0.0267	0.1076
ENSG00000066230	SLC9A3	chr5:473424-524447	protein_coding	2783	0.0347	0.0904	0.0615	0.0461	0	0.0225	0.0097	0.0121	0.1005	0.0294	0.1931	0	0.0526	0	0.0241	0	0	0	0	0
ENSG00000066248	NGEF	chr2:233743395-233877982	protein_coding	4687	0.5154	0.2898	0.353	0.3561	0.499	0.5871	0.6763	0.4543	0.0597	0.0698	0.1459	0.0219	0.2187	0.0252	0.1928	0.1485	0.4969	0.1194	0.2815	0.2072
ENSG00000066279	ASPM	chr1:197053257-197115824	protein_coding	10887	25.2958	19.5793	27.7549	27.446	22.9036	21.9598	24.1486	23.36	25.8888	17.6969	20.5005	12.6326	7.2299	1.7009	1.3682	2.4939	0.0697	0.7451	3.4686	3.4471
ENSG00000066294	CD84	chr1:160510884-160549306	protein_coding	9255	0	0	0.0092	0	0	0	0	0.0037	0	0	0	0	0.0316	0	0.0109	0.0047	0	0	0	0.0028
ENSG00000066322	ELOVL1	chr1:43829067-43833696	protein_coding	2458	5.091	5.0964	7.4613	9.0628	6.6302	6.793	9.9779	9.5285	6.4125	8.58	7.5535	10.7986	4.3193	4.5825	4.4941	3.6643	7.779	6.7331	18.3335	18.5459
ENSG00000066336	SPI1	chr11:47376410-47400127	protein_coding	2069	0.0701	0	0	0	0	0	0	0	0	0	0	0	0	0.0285	0	0	0.0262	0	0	0
ENSG00000066379	ZNRD1	chr6:30026675-30032686	protein_coding	3672	3.2105	2.5483	6.6257	6.1452	4.9357	4.9729	10.5417	10.4004	4.2925	4.6303	9.0879	7.2378	2.6919	2.2966	4.166	4.8701	0.8408	1.1553	3.2337	3.2805
ENSG00000066382	MPPED2	chr11:30406039-30608419	protein_coding	8198	0.1945	0.3375	0.4488	0.4268	0.1426	0.1449	0.1769	0.3051	10.5462	10.7787	15.2335	11.9134	2.8313	1.8128	2.4826	3.7206	0	0	0.0036	0.0224
ENSG00000066405	CLDN18	chr3:137717576-137752494	protein_coding	3877	0	0	0	0	0	0	0	0	0	0	0	0	0.0189	0	0	0	0	0.012	0	0
ENSG00000066422	ZBTB11	chr3:101367732-101396339	protein_coding	7416	4.8146	3.8261	5.6114	5.7003	4.7893	4.8993	6.0202	6.3939	5.9612	6.5583	7.2604	6.9464	5.0453	3.6898	6.0123	5.9259	2.2131	2.7283	5.0249	4.5899
ENSG00000066427	ATXN3	chr14:92524895-92572965	protein_coding	8470	4.0329	3.4094	5.2869	5.3169	3.1061	3.3815	4.05	3.7986	3.3364	3.8603	4.7648	3.1539	3.0516	2.1097	4.9045	4.5463	1.2023	1.5246	2.7069	2.5005
ENSG00000066455	GOLGA5	chr14:93260575-93306308	protein_coding	3295	7.9034	7.8021	15.0879	14.1643	7.1639	6.9084	11.9272	11.2314	9.9918	9.3278	14.0572	14.1931	9.422	7.6602	22.939	18.5665	8.762	9.0126	23.2418	22.3492
ENSG00000066468	FGFR2	chr10:123237847-123357972	protein_coding	7543	23.9365	27.1855	27.3314	31.8049	3.9142	4.4438	6.104	8.8849	1.6074	1.5388	1.7683	1.6575	5.8339	0.4065	1.429	0.8076	0.0287	0.1978	0.1127	0.0661
ENSG00000066557	LRRC40	chr1:70610487-70671303	protein_coding	2884	16.9203	12.7692	27.5434	27.6466	18.4729	17.7808	29.6198	30.4452	15.0377	11.9326	16.9754	16.9738	9.7492	8.3838	11.4791	11.3756	2.5919	5.4314	10.8168	10.2282
ENSG00000066583	ISOC1	chr5:128430443-128449721	protein_coding	1940	12.3278	8.6874	17.1576	13.766	9.7566	9.6706	14.4976	13.8323	6.1537	5.2248	5.7674	9.315	4.3026	3.4958	2.847	2.7811	1.2006	2.355	3.8085	3.5984
ENSG00000066629	EML1	chr14:100204029-100408397	protein_coding	8899	5.3424	5.1954	8.766	6.5431	2.5458	2.3401	2.6353	2.3357	6.2359	5.2817	5.8418	7.5392	2.6741	1.9549	2.2983	2.5718	6.0625	2.1846	3.8548	3.7247
ENSG00000066651	TRMT11	chr6:126307575-126360422	protein_coding	2690	10.0941	8.5283	14.802	16.4669	11.8179	12.4375	19.2533	19.4111	10.0894	8.7212	12.8596	12.242	6.8321	6.4673	13.8002	13.3606	2.3962	3.9861	8.8176	8.361
ENSG00000066654	THUMPD1	chr16:20744985-20753406	protein_coding	5092	17.3638	15.7982	25.817	24.3891	11.6252	11.6549	15.7209	18.7302	17.1074	15.6518	19.9582	24.0306	11.6762	10.5739	16.4017	14.817	3.787	4.2481	9.6387	8.6947
ENSG00000066697	MSANTD3	chr9:103189437-103213511	protein_coding	2763	9.5826	7.3561	11.6753	9.015	5.3164	5.3641	6.3584	5.9447	7.1224	7.1891	6.5959	7.8756	5.4591	5.0798	4.4947	4.7401	4.4698	4.1845	8.8817	8.805
ENSG00000066735	KIF26A	chr14:104605059-104647231	protein_coding	6756	18.0788	15.4219	5.1675	5.269	11.239	12.1907	8.5765	9.7498	4.9008	5.4567	2.2636	2.4978	7.7382	4.7398	3.7557	5.1008	0.8579	0.5313	0.1432	0.1127
ENSG00000066739	ATG2B	chr14:96747594-96830207	protein_coding	12722	3.6458	3.8082	3.6029	4.3271	3.4294	3.2099	3.4143	3.4031	5.1318	5.5129	5.757	4.2882	5.7669	4.311	6.5464	5.5954	3.3636	3.5069	4.4686	4.3754
ENSG00000066777	ARFGEF1	chr8:68085746-68255912	protein_coding	10970	16.7054	16.2393	21.1124	23.4989	8.4939	9.4289	10.8969	10.9986	8.3659	7.906	9.6293	7.6511	10.5459	9.5045	13.2034	12.3076	5.1402	5.2824	9.1085	9.0143
ENSG00000066813	ACSM2B	chr16:20547547-20587749	protein_coding	8155	0.0059	0	0	0	0	0	0	0	0	0	0	0.0209	0.0539	0.0145	0	0.0213	0	0.0057	0	0
ENSG00000066827	ZFAT	chr8:135490030-135725292	protein_coding	8900	1.6395	1.1645	1.4806	1.522	0.9443	1.0329	1.1017	1.2076	1.9387	2.1033	1.7677	1.8539	1.7359	2.074	2.0912	1.9849	1.1625	1.451	1.4725	1.4036
ENSG00000066855	MTFR1	chr8:66556968-66683496	protein_coding	4629	5.5214	4.782	7.4002	7.7178	6.836	6.8089	10.5269	10.0463	4.614	3.6024	5.1614	5.0035	2.5625	1.2995	3.1095	2.8481	1.1234	1.3697	3.3696	3.362
ENSG00000066923	STAG3	chr7:99775185-99819111	protein_coding	8583	0.4672	0.5744	0.4819	0.5086	0.2299	0.306	0.1909	0.2441	0.2499	0.2286	0.1651	0.1274	0.1536	0.0962	0.1911	0.1521	0.0252	0.0217	0.0854	0.0397
ENSG00000066926	FECH	chr18:55215514-55254004	protein_coding	4473	4.191	4.364	5.6242	6.6235	3.7905	3.5651	4.0537	4.5561	4.2119	3.8377	4.2382	4.3608	2.7501	1.6876	1.4518	1.7509	3.5724	4.2315	7.492	7.2929
ENSG00000066933	MYO9A	chr15:72114631-72410918	protein_coding	20250	3.1423	3.031	3.6016	3.9453	3.9915	4.2648	5.3009	5.0019	5.5545	5.6271	6.5677	4.71	5.1706	3.6345	5.6104	5.8724	2.4984	3.6052	5.0328	4.5606
ENSG00000067048	DDX3Y	chrY:15016018-15032390	protein_coding	5738	0	0	0.0547	0.0168	0	0	0.0094	0.0236	0	0	0.0341	0.3751	0	0	0.0233	0.0303	0	0	0.0204	0.0091
ENSG00000067057	PFKP	chr10:3108524-3179904	protein_coding	4827	16.4753	17.2596	15.9601	18.1007	5.7078	7.7733	9.3438	9.7602	7.6321	10.9566	11.4076	9.5611	9.1469	3.2742	6.8515	6.9859	6.2392	9.9478	18.3374	19.3228
ENSG00000067064	IDI1	chr10:1085847-1095110	protein_coding	3589	18.1467	13.5831	30.8749	26.7502	21.7878	22.3381	31.3087	32.2147	34.0686	29.5174	30.372	51.0651	17.9328	25.5182	30.6106	27.0474	9.9006	24.1476	36.8512	33.6733
ENSG00000067066	SP100	chr2:231280656-231408805	protein_coding	12691	0.0266	0.0119	0.0135	0.0379	0.0058	0.0049	0.0064	0.0027	0	0.0129	0	0.0242	0.1212	0.0046	0.0158	0.0103	1.8225	1.6494	4.0753	3.8401
ENSG00000067082	KLF6	chr10:3818187-3827473	protein_coding	6139	3.5337	3.0567	2.8341	4.2666	5.4522	5.0628	7.2856	8.0211	12.944	16.0981	16.6897	46.8424	8.2535	7.0414	10.8999	9.9227	4.6411	6.3638	17.3556	15.4967
ENSG00000067113	PPAP2A	chr5:54720681-54830878	protein_coding	2016	10.6408	18.8909	15.1526	20.7303	3.8063	4.684	3.8509	4.3419	3.8861	3.8925	3.4657	3.389	5.5932	4.9729	5.1639	5.5684	18.4049	8.1631	13.947	12.8486
ENSG00000067141	NEO1	chr15:73344050-73597547	protein_coding	8117	12.5177	10.4808	9.1432	9.2812	7.869	7.3114	6.2979	5.4919	9.8816	10.7654	8.9869	7.3145	12.5026	7.0038	5.6415	6.2986	4.0774	4.1755	3.9372	3.7473
ENSG00000067167	TRAM1	chr8:71485676-71520622	protein_coding	3878	22.2638	17.8768	36.7232	34.9872	18.5246	17.3837	28.6499	30.7901	21.7173	20.8677	32.4301	36.2749	16.9551	13.8232	28.5625	28.5212	19.5688	19.547	63.6812	59.7493
ENSG00000067177	PHKA1	chrX:71798663-71934167	protein_coding	6350	2.4424	2.6541	2.6187	2.9369	5.3286	5.968	6.5867	6.2271	4.7588	3.4628	4.3781	2.9534	1.9026	1.4766	2.2878	1.8432	3.1647	1.2628	2.2901	2.145
ENSG00000067182	TNFRSF1A	chr12:6437922-6451280	protein_coding	4005	7.4433	7.2104	6.4594	5.7064	4.4706	3.9817	3.8165	3.5611	4.8671	5.1229	4.9042	4.7083	4.8082	3.4898	2.1814	2.3684	8.8858	8.707	13.287	12.5027
ENSG00000067191	CACNB1	chr17:37329708-37353956	protein_coding	7094	1.403	0.9078	0.8041	0.7013	1.4628	1.6397	1.2648	1.0576	1.9721	2.3967	2.2797	2.2199	12.2516	15.03	13.5	11.9358	19.4478	15.0097	9.2702	9.5039
ENSG00000067208	EVI5	chr1:92974252-93257961	protein_coding	8276	4.2208	3.4711	3.7979	4.2392	3.7706	3.1057	3.4731	3.7407	6.7166	6.1731	7.297	6.7942	5.618	4.7386	5.8527	6.635	5.4586	4.1065	7.1739	6.6212
ENSG00000067221	STOML1	chr15:74275546-74286963	protein_coding	6178	0.3285	0.3176	0.5032	0.4832	0.5087	0.496	0.587	0.5908	0.9813	0.9262	1.1863	1.1169	1.4222	1.6037	1.6526	1.9227	2.9196	1.713	2.4678	2.4723
ENSG00000067225	PKM	chr15:72491369-72524164	protein_coding	8572	67.969	77.5709	109.501	101.118	100.797	118.667	147.968	115.509	103.722	103.027	91.2264	138.149	75.8513	133.287	72.5047	79.4082	176.44	86.9576	193.787	194.031
ENSG00000067248	DHX29	chr5:54552072-54603550	protein_coding	4728	14.4189	10.3428	18.3273	17.2577	8.5013	8.4122	11.3065	11.3442	12.1317	10.6154	12.4112	16.6686	11.2123	16.477	13.4873	13.749	9.3371	10.797	16.4704	15.7475
ENSG00000067334	DNTTIP2	chr1:94333372-94345474	protein_coding	5985	13.3764	10.4653	20.6782	20.7983	9.5854	9.7906	15.6778	16.0372	11.0174	8.823	11.7066	16.9348	6.6064	8.4247	12.0528	10.4252	5.1859	5.8031	12.1735	11.0545
ENSG00000067365	METTL22	chr16:8715539-8740081	protein_coding	4824	3.6457	3.4624	5.1381	5.1302	3.4995	4.4465	6.3426	5.5277	3.0934	2.474	3.5854	2.2661	2.9446	2.2372	4.3161	4.3655	2.1671	1.3047	3.9202	3.9116
ENSG00000067369	TP53BP1	chr15:43699406-43802926	protein_coding	8843	16.7952	16.0434	22.2071	20.7952	14.7847	14.8791	16.0241	16.2544	17.6344	18.3118	16.885	15.456	20.2447	18.3728	20.7627	22.3091	11.8281	16.5696	19.5318	18.8097
ENSG00000067445	TRO	chrX:54946894-54957864	protein_coding	6716	8.2299	7.431	10.439	9.75	9.2385	10.4662	12.5874	13.1242	19.9281	19.9609	23.4984	19.3744	24.3995	21.9875	24.6768	21.9758	8.4202	10.5304	14.485	14.0442
ENSG00000067533	RRP15	chr1:218458628-218511325	protein_coding	7883	7.3793	5.38	9.1758	9.0029	6.0445	4.9106	6.1168	7.2112	6.7675	4.5729	5.851	8.3073	4.2169	5.0871	7.24	7.308	3.4219	3.5484	5.2182	5.4865
ENSG00000067560	RHOA	chr3:49396577-49450431	protein_coding	2582	87.0493	79.6141	149.494	136.736	83.8645	87.7736	148.806	149.991	72.6409	78.7348	115.184	128.692	70.9234	71.3293	101.965	107.295	67.4673	55.5391	183.557	180.607
ENSG00000067596	DHX8	chr17:41561232-41621831	protein_coding	9302	7.7963	6.0088	9.3307	8.4818	4.8553	4.7464	5.1808	5.2065	8.1114	7.777	8.1572	9.989	5.9902	6.1876	5.4302	5.281	3.261	4.1498	5.9792	6.0094
ENSG00000067601	PMS2P4	chr7:66752527-66767894	pseudogene	1327	0.5825	0.7203	0.6878	0.7499	1.1565	1.0839	0.9717	1.197	1.1948	0.924	1.3623	1.1069	1.1587	0.7999	1.3117	1.1804	0.6123	0.5972	0.8396	0.712
ENSG00000067606	PRKCZ	chr1:1981908-2116834	protein_coding	7636	3.4167	3.7225	3.7315	4.3381	1.6174	2.203	1.9982	1.6951	1.0138	1.1026	1.3373	0.6039	1.026	0.224	0.7671	0.6496	0.1773	0.2198	0.0768	0.1443
ENSG00000067646	ZFY	chrY:2803111-2850547	protein_coding	5737	0.0084	0	0	0	0	0.0109	0.014	0.0118	0.0163	0.0285	0.0085	0.0595	0.0255	0	0.0233	0.0076	0.0094	0	0	0
ENSG00000067704	IARS2	chr1:220267443-220321380	protein_coding	4162	27.9535	22.3382	38.7815	38.5691	32.8354	31.8692	51.8344	49.6638	22.7452	19.9544	29.9002	33.0774	15.2352	14.6086	19.8978	21.3478	14.3031	16.0626	24.0218	22.5173
ENSG00000067715	SYT1	chr12:79257772-79845788	protein_coding	6494	4.65	4.0207	5.9996	6.5541	4.3551	3.8808	5.0962	5.5634	3.0304	2.6308	3.1073	2.7354	3.3374	1.789	1.4691	2.66	0.4087	0.7466	1.4673	1.3053
ENSG00000067798	NAV3	chr12:78224684-78606790	protein_coding	11179	1.6596	0.378	0.2551	0.3647	0.3203	0.3524	0.1586	0.1119	6.8579	11.7433	11.6783	8.1437	55.0119	60.6399	53.075	56.3437	15.1467	24.8007	24.42	23.7062
ENSG00000067829	IDH3G	chrX:153051220-153059978	protein_coding	2710	5.3485	6.1262	7.3043	7.2488	6.9305	6.1382	7.9894	7.9067	7.6747	8.5664	9.1589	9.8197	6.2413	7.3988	5.5213	6.3741	6.6159	4.9888	10.213	9.4904
ENSG00000067836	ROGDI	chr16:4846968-4852951	protein_coding	3683	3.8437	4.7127	3.8489	3.7912	2.9367	3.9902	3.6323	4.0376	1.9246	2.0419	1.5123	1.7809	2.6242	1.5852	1.3542	1.524	2.7208	1.8101	2.4439	2.5581
ENSG00000067840	PDZD4	chrX:153067620-153096020	protein_coding	4381	7.3118	11.9084	8.6785	11.4664	1.0009	1.1705	1.0608	1.0723	2.2779	2.7614	2.5316	2.0741	6.4011	0.6327	0.9169	1.0031	0.272	0.1915	0.5555	0.617
ENSG00000067842	ATP2B3	chrX:152783133-152848397	protein_coding	7534	0.0385	0.0334	0.0189	0.0682	0.0873	0.0166	0.0357	0.0673	0.0371	0.0542	0.1751	0.1406	0.1749	0.0861	0.0844	0.0751	0.0072	0.0186	0.0117	0.0139
ENSG00000067900	ROCK1	chr18:18526866-18691812	protein_coding	11064	11.2665	9.7672	13.0548	13.6761	10.4033	9.9592	12.6569	12.1667	9.9386	9.3903	11.1505	9.9389	8.6099	8.7948	10.3441	10.2485	3.7208	5.6631	10.3773	10.221
ENSG00000067955	CBFB	chr16:67063018-67134961	protein_coding	4129	10.2738	6.8111	11.4739	9.6241	11.6108	11.1623	14.7423	14.2341	20.9844	18.9656	18.7675	23.0745	11.1897	11.2975	15.4196	13.5518	6.2313	6.4922	11.4749	11.5171
ENSG00000067992	PDK3	chrX:24483337-24557954	protein_coding	2695	11.9936	14.8221	16.4891	14.5664	9.3554	10.6973	10.2966	8.5276	9.7246	9.0083	8.4303	5.5519	7.0368	3.2386	4.3224	4.7305	2.4521	1.1244	4.0144	3.827
ENSG00000068001	HYAL2	chr3:50355220-50360337	protein_coding	4545	7.6645	7.5934	11.2207	10.5865	7.6699	7.5676	10.7687	10.2691	6.464	7.4099	8.6861	10.6804	5.2519	5.1382	4.5442	5.2366	5.1724	4.8415	8.7732	8.5459
ENSG00000068024	HDAC4	chr2:239969863-240323348	protein_coding	13443	2.2283	1.9535	1.4873	1.5114	1.881	2.2655	1.7745	1.8629	3.0874	3.3079	2.3952	2.0304	2.7397	1.9741	3.2197	4.1106	3.0502	1.3456	1.0818	1.0659
ENSG00000068028	RASSF1	chr3:50367218-50378411	protein_coding	3677	1.9841	1.5324	2.4667	2.2784	2.1068	2.5171	3.5286	3.3089	2.0292	2.0897	2.7506	2.6663	2.2303	1.3472	4.2514	3.2542	1.6794	1.027	3.3011	2.9049
ENSG00000068078	FGFR3	chr4:1795033-1810599	protein_coding	4834	19.5599	35.1041	19.9315	28.4199	4.2331	4.7607	5.3959	6.0476	1.2348	0.7948	0.9097	0.6996	2.8931	0.0732	0.6232	0.4501	0	0.0193	0.0121	0.0869
ENSG00000068079	IFI35	chr17:41158741-41166473	protein_coding	1973	0.6122	0.765	1.0409	1.4317	0.5186	0.317	0.4085	0.6681	0	0.0414	0.1981	0.1558	0.1484	0.0299	0.1866	0.1764	0.4942	0.7325	2.7194	2.5273
ENSG00000068097	HEATR6	chr17:58120554-58156292	protein_coding	4866	7.7149	6.8237	8.5286	8.648	5.677	6.0274	7.5189	7.5289	7.0343	6.7531	6.9885	6.578	5.7782	5.2113	6.2531	5.4456	2.026	3.8035	5.5011	5.21
ENSG00000068120	COASY	chr17:40713484-40718295	protein_coding	4032	9.5623	7.1371	9.6065	9.6089	6.5432	5.8783	6.5758	6.8817	6.2455	4.6021	6.3013	5.5494	4.9576	4.2416	6.6583	6.4317	2.6197	2.2778	4.7047	4.6148
ENSG00000068137	PLEKHH3	chr17:40819931-40829048	protein_coding	4839	2.586	3.1606	1.4677	2.0563	2.6731	2.9595	1.8097	1.5715	2.0238	1.9595	1.5044	1.6237	2.2697	1.5965	1.2797	1.2768	2.6641	1.6474	1.0361	1.4264
ENSG00000068305	MEF2A	chr15:100017369-100256671	protein_coding	7030	3.8762	3.6712	3.5095	3.534	4.6676	4.5901	3.5269	3.5864	8.398	7.2673	6.7764	6.7738	14.1233	17.4989	18.0226	13.7527	30.5507	12.3346	15.3019	13.5849
ENSG00000068308	OTUD5	chrX:48779304-48815648	protein_coding	3329	10.5948	10.6845	10.1958	10.5967	9.2202	8.4158	9.1829	9.3806	8.4609	8.0539	7.4705	6.7213	7.8301	5.5093	6.7672	4.9406	5.6624	5.2515	9.1419	9.7439
ENSG00000068323	TFE3	chrX:48886241-48901012	protein_coding	4278	8.5381	11.0897	10.0075	10.587	5.5007	5.0432	3.9999	3.3339	4.1859	4.2228	4.6141	4.4957	5.1004	4.494	4.7965	4.6684	4.6215	4.4244	8.3818	9.705
ENSG00000068354	TBC1D25	chrX:48397844-48420997	protein_coding	4223	1.6818	1.9538	1.182	1.3302	1.9728	2.1324	1.6666	1.4565	1.8773	1.7808	1.7355	1.537	1.7512	1.3965	1.7042	1.0097	1.5264	1.1923	1.6593	1.4915
ENSG00000068366	ACSL4	chrX:108867472-108976632	protein_coding	6415	21.5403	16.1005	30.879	30.2522	13.6934	14.5837	22.7297	22.5382	14.1899	14.1313	21.0441	23.1111	16.573	19.4707	41.8594	36.5859	22.4013	41.765	68.3871	63.0182
ENSG00000068383	INPP5A	chr10:134351323-134596979	protein_coding	3701	7.0364	5.7364	8.8627	7.6148	6.3385	5.914	7.5123	6.9402	9.1477	8.2604	11.5382	8.9994	6.0737	5.3699	9.126	7.8651	12.1477	9.2458	10.2352	10.2253
ENSG00000068394	GPKOW	chrX:48970333-48980151	protein_coding	1735	8.3263	6.2633	10.6692	10.3418	6.95	6.7042	10.9928	10.7916	6.827	7.5853	9.7155	9.8643	7.0899	8.0217	9.1643	11.0094	5.5884	4.8097	9.3788	9.7413
ENSG00000068400	GRIPAP1	chrX:48830133-48858675	protein_coding	5779	6.1533	7.1037	8.8544	9.3535	4.1352	4.361	6.1265	5.5792	5.1483	4.4697	5.6392	5.3201	5.6002	3.9492	5.6939	5.6996	2.6151	3.2752	5.6518	5.3451
ENSG00000068438	FTSJ1	chrX:48334540-48344752	protein_coding	2740	10.1038	8.9418	12.908	12.3825	8.455	8.2621	11.049	10.8298	12.0497	11.068	10.5386	16.8435	7.1617	8.0496	8.4296	8.8769	11.0113	5.4616	25.4243	24.2325
ENSG00000068489	PRR11	chr17:57232859-57282066	protein_coding	4080	18.8878	17.6452	15.5336	19.7626	17.4283	15.2356	16.6905	15.134	12.3212	10.1377	9.5204	5.1074	4.0558	1.5321	0.9681	1.781	0.3186	0.537	1.8971	2.2578
ENSG00000068615	REEP1	chr2:86441115-86565206	protein_coding	5326	0.2721	0.255	0.332	0.3074	0.1647	0.1761	0.1009	0.0952	1.541	2.0413	1.8347	3.6303	5.8015	14.9591	10.144	9.4522	17.3708	16.6749	14.533	13.2944
ENSG00000068650	ATP11A	chr13:113344642-113541482	protein_coding	12172	4.0527	4.1828	2.1957	3.1434	5.0854	5.4254	4.3079	5.4366	4.176	3.9689	2.85	1.8467	2.1114	1.0465	1.5263	1.4549	1.2861	1.2716	0.9081	0.8301
ENSG00000068654	POLR1A	chr2:86247338-86333278	protein_coding	13519	9.821	8.0568	8.6439	7.9872	8.1952	8.2894	7.8548	7.5098	9.8309	10.5692	7.7378	9.875	6.7701	7.5554	5.0858	5.4328	3.8144	6.1624	5.1139	5.4122
ENSG00000068697	LAPTM4A	chr2:20232410-20251789	protein_coding	1946	33.2445	30.0149	68.8438	63.5372	27.6024	26.7048	55.2026	58.6146	46.8249	44.4416	90.9646	94.2318	35.4438	22.1224	49.11	46.7308	35.7122	42.5949	101.276	92.7169
ENSG00000068724	TTC7A	chr2:47143295-47303276	protein_coding	6949	3.0245	2.1719	2.5818	2.1664	2.4925	2.4478	2.8529	2.7771	1.1945	1.0352	0.9562	0.8455	1.3276	0.4922	1.3825	1.1897	0.608	0.4361	1.2151	1.3105
ENSG00000068745	IP6K2	chr3:48725435-48777786	protein_coding	5624	9.931	9.0796	15.4226	13.8234	10.1616	12.1092	16.7701	15.9369	14.3283	14.0985	16.3067	19.1334	10.3633	8.4307	9.6363	10.1428	3.2843	4.3436	8.3672	7.8489
ENSG00000068781	STON1-GTF2A1L	chr2:48757063-49003654	protein_coding	4294	0.0675	0.0234	0.0266	0.0374	0.034	0.0146	0.0751	0.0236	0.0217	0.0381	0.1252	0.0318	0.0171	0	0.1559	0.0608	0.0378	0.0217	0.0341	0.0306
ENSG00000068784	SRBD1	chr2:45615818-45839304	protein_coding	5045	7.8338	5.9035	11.2903	10.2435	8.0686	8.4539	12.023	11.4956	8.1527	7.7935	9.4523	8.8026	5.341	4.8511	7.1725	7.926	1.7179	2.3656	5.4164	5.0459
ENSG00000068793	CYFIP1	chr15:22892004-23006016	protein_coding	10435	10.2788	8.4516	11.0509	11.4029	10.0289	9.8584	13.2937	13.0555	12.513	12.5806	15.1845	13.0587	8.8271	8.0646	10.1913	10.3076	5.2895	8.0998	13.849	13.4552
ENSG00000068796	KIF2A	chr5:61601988-61833076	protein_coding	4774	18.4597	15.8705	20.4031	22.0736	16.4409	15.2476	17.0438	15.9214	15.3555	14.5369	14.8093	15.635	16.4416	16.0217	19.163	17.0982	7.1935	8.8571	12.6759	11.8906
ENSG00000068831	RASGRP2	chr11:64494382-64512928	protein_coding	6084	0.6194	1.0998	0.7642	1.2504	0.0721	0.1131	0.1413	0.1167	0.1686	0.1075	0.2329	0.2077	0.7221	0.7367	1.1939	1.0585	0.1514	0.2222	0.212	0.2286
ENSG00000068878	PSME4	chr2:54091203-54197977	protein_coding	10259	16.0642	12.5148	13.8428	13.6354	8.7335	10.247	9.3793	10.1137	9.7548	12.0155	9.6395	12.044	8.586	9.939	10.6664	8.3977	10.5018	7.9525	10.8857	9.987
ENSG00000068885	IFT80	chr3:159974773-160117668	protein_coding	7175	2.9225	2.9379	6.5154	6.6613	3.1677	3.068	5.4774	5.5441	4.2766	4.1127	5.6043	4.6897	2.49	1.9069	2.0061	2.6258	0.8908	1.5724	4.7932	4.4916
ENSG00000068903	SIRT2	chr19:39369196-39390502	protein_coding	6204	1.1448	1.4029	1.6413	1.7488	2.6975	2.7014	3.0439	2.7347	9.1102	14.7964	18.1214	11.7448	20.1816	32.4047	35.5782	38.0546	21.6178	16.0133	36.89	37.8853
ENSG00000068912	ERLEC1	chr2:54014180-54045956	protein_coding	2592	10.252	9.7824	16.429	16.9533	8.3174	7.7205	13.2967	14.0298	10.3269	8.4202	13.8548	15.3144	10.0283	8.0087	18.2479	18.2135	13.1864	11.2412	29.7491	27.2159
ENSG00000068971	PPP2R5B	chr11:64685024-64701945	protein_coding	3376	1.0733	1.2071	1.2335	1.0078	0.7793	1.1114	0.9628	0.7708	1.7957	3.3414	3.1695	2.3678	4.7715	2.7425	2.7465	3.7118	4.0112	2.5685	4.8634	5.1229
ENSG00000068976	PYGM	chr11:64513860-64527769	protein_coding	4981	1.4259	2.2221	1.5747	2.3715	0.807	1.0546	1.0732	0.8481	0.9549	0.64	0.6474	0.8093	4.5717	4.5109	10.1746	6.3506	11.3097	15.3589	3.6436	4.2572
ENSG00000068985	PAGE1	chrX:49452052-49460596	protein_coding	665	0	0	0	0	0	0	0	0	0	0	0	0	0.1101	0	0	0	0	0	0	0
ENSG00000069011	PITX1	chr5:134363424-134370503	protein_coding	3511	0.0138	0	0	0	1.1656	1.7277	0.2448	0.6931	2.4439	2.9568	0.6541	0.6616	0.6882	0.8902	0.1239	0.3098	0.2623	0.717	0.4509	0.6578
ENSG00000069018	TRPC7	chr5:135548998-135732730	protein_coding	3608	0	0	0	0	0.0203	0	0	0	0	0	0.0271	0.0189	0.0406	0	0	0	0	0.0129	0	0
ENSG00000069020	MAST4	chr5:65892175-66465423	protein_coding	14697	0.6641	0.5408	0.326	0.498	0.6812	0.6	0.3381	0.3541	1.9419	2.5974	1.9149	1.3388	1.5594	1.3482	0.8063	0.7786	1.7543	1.0753	1.1052	1.1714
ENSG00000069122	GPR116	chr6:46820248-46922680	protein_coding	6717	0	0	0.0042	0	0	0	0.004	0.0151	0	0.0487	0	0.0559	0.0872	0.158	0.0299	0	0.0081	0.0555	0.0742	0.0664
ENSG00000069188	SDK2	chr17:71330522-71640228	protein_coding	11607	8.4334	9.5183	3.7106	5.412	8.9722	9.2293	5.8854	5.8759	6.131	5.7396	2.8793	1.9631	10.9701	8.6018	6.8032	7.3212	3.8361	3.7835	0.677	0.6874
ENSG00000069206	ADAM7	chr8:24298442-24384483	protein_coding	4483	0	0	0	0	0	0	0	0.0075	0	0	0	0	0.0327	0.0263	0	0.0291	0	0	0	0.0059
ENSG00000069248	NUP133	chr1:229577044-229644103	protein_coding	5057	22.3088	18.9816	32.3578	31.0322	20.4632	21.2082	30.8149	30.7759	20.3611	20.4315	25.304	23.893	13.7551	13.4808	19.2027	21.1661	6.3089	7.3935	13.8624	13.5761
ENSG00000069275	NUCKS1	chr1:205681946-205719404	protein_coding	6546	145.019	132.544	214.11	193.479	111.251	110.265	142.681	133.803	148.648	120.74	145.316	165.147	75.9273	71.4503	76.7507	88.4312	27.2737	45.8362	79.7836	76.5989
ENSG00000069329	VPS35	chr16:46690053-46723430	protein_coding	9723	8.691	7.5234	13.8168	11.7427	11.1692	10.5095	12.9299	12.5517	12.2974	11.7111	13.2312	14.8055	8.9916	7.4118	9.4366	9.9123	5.961	8.5826	13.7233	13.0855
ENSG00000069345	DNAJA2	chr16:46989298-47007699	protein_coding	5039	18.6682	16.3637	27.7074	26.563	17.8967	16.4438	24.6877	26.0635	15.9732	14.7944	19.1597	19.0904	12.9614	12.78	18.5405	17.4251	9.0081	11.0096	19.7711	19.3692
ENSG00000069399	BCL3	chr19:45250961-45263301	protein_coding	3242	0.3577	0.5121	0.1408	0.1881	0.6086	0.5208	0.3729	0.2502	1.237	1.2607	0.5275	0.274	1.2196	0.5639	0.3201	0.3624	1.6374	0.9347	1.1033	1.2466
ENSG00000069424	KCNAB2	chr1:6051525-6161253	protein_coding	9253	0.6109	0.5383	0.4346	0.5828	0.616	0.6826	0.6648	0.6757	0.5846	0.4417	0.6759	0.395	0.4906	0.0446	0.1736	0.1599	0.1288	0.1713	0.2947	0.312
ENSG00000069431	ABCC9	chr12:21950334-22094336	protein_coding	11421	1.2141	1.2818	0.4071	0.6689	1.6381	1.67	0.6915	0.728	5.5449	5.4108	4.586	3.2124	14.9313	15.9657	16.3222	17.4486	3.78	4.686	2.7648	2.6747
ENSG00000069482	GAL	chr11:68451246-68458643	protein_coding	1300	20.7011	14.8219	13.0326	12.1481	0.7308	0.6735	0.3513	0.494	0.287	0.2515	0.1879	0.9723	1.0138	0.1361	0.0515	0	0.1667	0.2152	0.2255	0.2624
ENSG00000069493	CLEC2D	chr12:9817564-9848413	protein_coding	3219	1.2608	1.094	0.957	1.1268	2.4065	1.8456	1.694	1.3859	2.0282	2.9457	2.641	0.9551	2.4339	1.0076	2.6101	2.8656	0.488	1.0717	0.8197	0.9539
ENSG00000069509	FUNDC1	chrX:44382884-44402247	protein_coding	1399	6.6308	4.7468	6.4629	5.8048	5.6939	4.3807	4.5891	5.3872	5.6	5.2002	4.7846	5.9336	6.0712	5.9437	6.3885	5.7227	4.0267	4.7986	8.0266	6.5282
ENSG00000069535	MAOB	chrX:43625857-43741693	protein_coding	3050	0.4752	0.4619	0.7014	0.863	0.0719	0.082	0.1497	0.1441	0.2141	0.268	0.2883	0.4592	0.2401	0	0.0988	0.1997	0	0.0917	0.0577	0.0602
ENSG00000069667	RORA	chr15:60780482-61521518	protein_coding	17033	0.6864	0.9983	1.2124	1.3455	1.7033	2.001	1.6765	1.1032	1.4456	1.4829	1.8961	1.3016	1.9731	1.3122	2.3033	2.0104	2.3183	1.207	1.9348	1.778
ENSG00000069696	DRD4	chr11:637292-640706	protein_coding	1477	1.701	1.4987	0.251	0.1087	0.1484	0.3811	0.0182	0.0686	0.3157	0.1107	0	0.0231	0.2974	0.1996	0.204	0.2946	0.0367	0.0316	0.0794	0.1599
ENSG00000069702	TGFBR3	chr1:92145901-92371892	protein_coding	8654	1.0608	0.7906	0.9723	0.9829	1.4694	1.214	1.4434	1.6988	5.9814	4.2127	6.8654	4.2356	3.2067	0.2113	0.2205	0.5581	0.1753	13.166	0.4303	0.4731
ENSG00000069712	KIAA1107	chr1:92632541-92650280	protein_coding	4623	2.0275	1.5997	2.7332	2.7912	1.6124	1.745	2.3243	2.1932	1.614	1.556	1.8812	0.9976	2.2807	0.8292	2.346	2.5977	0.9256	1.1395	1.1289	0.9026
ENSG00000069764	PLA2G10	chr16:14766404-14788526	protein_coding	1113	0.0434	0.0904	0.0769	0.1154	0	0	0	0.0304	0	0	0	0	0	0.106	0.0902	0	0	0	0	0
ENSG00000069812	HES2	chr1:6472477-6484730	protein_coding	5407	0.3574	0.2233	0.153	0.2137	0.0676	0.1157	0.0745	0.025	0.0172	0.0605	0.0904	0.0885	0.1219	0.0218	0.1919	0.1207	0.581	0.1983	0.4718	0.5727
ENSG00000069849	ATP1B3	chr3:141594965-141645356	protein_coding	2584	49.8669	44.1374	58.5572	64.4703	39.5665	36.5682	66.398	71.9227	21.6202	20.0876	27.3983	32.1778	14.168	17.8699	22.1	21.4019	26.203	49.0913	56.4372	51.8683
ENSG00000069869	NEDD4	chr15:56119119-56285944	protein_coding	9097	7.5258	7.3332	4.8003	6.4818	11.4477	11.2121	8.345	8.6526	10.6625	11.286	8.3303	6.9621	10.7694	6.6772	5.3797	5.9979	12.9388	6.083	16.711	15.8035
ENSG00000069943	PIGB	chr15:55611157-55647846	protein_coding	4539	1.4689	1.064	1.9354	1.7326	1.288	1.2675	1.8997	1.7349	1.274	1.6208	1.5716	1.2418	1.0001	0.7406	1.1357	1.4379	0.8712	0.7395	2.2027	2.1219
ENSG00000069956	MAPK6	chr15:52244302-52358462	protein_coding	5281	33.6403	25.9691	49.9805	48.3818	23.5115	22.7717	35.9323	34.0975	19.7977	18.9767	23.4536	30.5513	15.3346	17.1748	20.1122	17.6895	14.9443	15.5899	33.05	30.6618
ENSG00000069966	GNB5	chr15:52413116-52483566	protein_coding	7487	2.9556	2.7416	3.7334	3.8028	1.6691	1.5536	1.8083	2.0268	0.6478	0.666	0.894	1.1589	0.9877	0.1733	0.1699	0.2848	1.5338	1.1021	2.4788	2.324
ENSG00000069974	RAB27A	chr15:55495163-55611311	protein_coding	5603	0.457	0.5747	0.9418	1.0713	0.9913	1.0157	1.9657	1.6407	0.7324	0.7295	0.8197	0.8658	0.6011	0.1579	0.472	0.5048	0.319	0.4659	2.0722	1.9064
ENSG00000069998	CECR5	chr22:17618400-17646177	protein_coding	4936	7.8208	8.1131	14.5733	13.201	7.5213	8.6405	14.1661	11.4619	6.0087	6.7401	9.1067	10.2219	4.0348	4.325	3.974	4.8306	1.5693	2.8334	4.5856	4.5087
ENSG00000070010	UFD1L	chr22:19437432-19466738	protein_coding	8736	4.7397	3.3804	6.174	4.9933	2.2252	2.1976	2.6814	2.5688	3.3309	3.2936	3.4676	5.4628	2.615	3.2133	3.3029	2.7941	3.559	2.4761	6.1149	6.0112
ENSG00000070018	LRP6	chr12:12268958-12419946	protein_coding	10337	16.8965	15.4622	21.2463	21.8513	10.8239	10.9258	13.4197	12.1952	17.6482	19.0972	23.9452	18.8864	13.3308	8.0042	12.6584	12.1605	6.6287	7.3152	11.3879	11.1176
ENSG00000070019	GUCY2C	chr12:14765575-14849519	protein_coding	4167	0.1044	0.3018	0.2738	0.5469	0.0877	0.1201	0.2321	0.5191	0	0	0	0.0164	0.0176	0	0	0	0	0	0	0
ENSG00000070031	SCT	chr11:626430-627143	protein_coding	366	0.132	1.6495	0.4676	0.0877	0	0	0	0	0.2548	0.2233	0	0	2.4007	2.7392	0.8231	1.6644	0	0.3821	0.1602	0.2868
ENSG00000070047	PHRF1	chr11:576485-612222	protein_coding	5769	10.9544	10.6043	8.3357	8.4127	8.1201	9.7994	7.3618	7.3698	9.3121	10.3577	7.3767	7.1768	8.0848	6.4196	6.7424	7.0369	4.3848	3.7577	5.3414	5.4135
ENSG00000070061	IKBKAP	chr9:111629796-111696396	protein_coding	6048	14.0999	11.3379	19.0244	18.1562	12.1197	12.0151	17.3222	17.0772	13.7864	13.9751	16.8681	17.295	9.8063	9.9653	10.6377	13.59	6.126	7.8316	11.208	10.8612
ENSG00000070081	NUCB2	chr11:17229699-17371521	protein_coding	8993	2.5305	2.0307	3.6061	3.1517	1.739	1.7107	2.1477	2.0256	3.9617	2.9905	4.7539	4.3874	2.6461	0.8459	2.4827	2.7288	2.5478	2.6749	8.3592	7.4824
ENSG00000070087	PFN2	chr3:149682690-149768575	protein_coding	3440	32.2755	32.1307	54.8229	52.3467	41.4265	45.0297	63.1509	59.6355	62.4939	60.0473	79.027	65.3623	33.8644	16.1661	19.8897	24.5635	37.5074	26.6301	83.0399	80.6009
ENSG00000070159	PTPN3	chr9:112137745-112260590	protein_coding	10071	0.71	0.6094	0.7732	0.7299	0.6386	0.6644	0.8109	0.9463	0.4723	0.4708	1.0237	0.8514	0.4508	0.0586	0.1529	0.1599	0.1183	0.6897	0.3988	0.3909
ENSG00000070182	SPTB	chr14:65213001-65346601	protein_coding	14771	0.2551	0.2384	0.28	0.2608	0.0346	0.0127	0.02	0.0229	0.6756	1.2507	1.677	2.3751	15.5254	22.3219	21.6399	21.5891	8.5334	17.3178	4.5693	4.6994
ENSG00000070190	DAPP1	chr4:100737989-100791311	protein_coding	4548	0.0212	0.0111	0	0.0071	0	0	0	0	0.0205	0.018	0.0645	0.0751	0.1127	0.0908	0.1325	0.2392	0.0357	0.1333	0.0322	0.0173
ENSG00000070193	FGF10	chr5:44303645-44389808	protein_coding	3011	0.0321	0.0167	0.0853	0.0426	10.1939	8.7854	9.1713	5.9153	15.6425	10.2076	12.7057	7.0908	4.8878	2.8399	6.5814	7.8034	0.036	1.6567	0.0487	0.0436
ENSG00000070214	SLC44A1	chr9:108006902-108201452	protein_coding	12613	10.3923	11.2162	19.0067	18.1068	6.107	6.0984	8.7533	10.2947	6.4849	5.9494	8.4176	6.9145	5.2653	3.0625	6.5499	7.4134	2.6497	3.4522	7.12	6.652
ENSG00000070269	TMEM260	chr14:56955071-57117324	protein_coding	8077	2.7038	2.6783	3.7432	4.0178	2.8773	2.5163	2.8369	3.0922	2.7598	3.0159	2.9641	2.563	2.2482	1.1974	1.6868	2.0686	1.234	1.5353	2.3921	2.5441
ENSG00000070366	SMG6	chr17:1963132-2207065	protein_coding	11060	4.8839	3.871	3.7007	3.4275	5.524	5.4451	3.9881	3.9755	4.5115	4.5084	2.7964	2.7489	3.6279	2.9913	1.9491	2.447	2.6398	2.3605	2.7596	2.7146
ENSG00000070367	EXOC5	chr14:57670517-57735726	protein_coding	9269	13.4536	10.812	23.1836	21.0204	7.7898	7.3001	12.062	12.7435	10.5854	9.3128	13.5155	16.0134	8.2471	9.9889	11.8562	12.6135	6.2237	8.3944	16.2776	14.9864
ENSG00000070371	CLTCL1	chr22:19166985-19279239	protein_coding	9843	2.3954	2.6783	3.0629	3.4306	1.0988	1.2453	1.5474	1.3322	1.3834	1.5613	1.9955	1.5097	1.5398	1.5278	2.3091	1.9539	1.4913	1.4114	1.4059	1.3571
ENSG00000070388	FGF22	chr19:639878-643703	protein_coding	2110	0.1145	0.0954	0.0946	0.1369	0	0	0.0255	0.016	0	0	0	0.0162	0	0	0	0.0412	0	0	0.0278	0
ENSG00000070404	FSTL3	chr19:676391-683385	protein_coding	3144	2.2283	2.0162	2.3678	2.6545	2.1385	2.1482	2.9477	3.3216	2.8478	3.1199	3.6209	3.9441	2.1426	1.4443	4.3759	4.0273	9.4757	4.6412	19.0053	20.2088
ENSG00000070413	DGCR2	chr22:19023794-19109967	protein_coding	5596	12.968	13.9348	12.7067	13.2845	11.3617	11.5775	9.9127	10.4482	15.1666	16.6377	13.8039	14.2906	10.6376	14.1109	8.0574	11.0566	7.221	7.1312	7.8275	8.5025
ENSG00000070423	RNF126	chr19:647525-663277	protein_coding	3677	7.2926	6.7453	1.7996	2.0951	7.0358	6.6499	2.1479	2.0221	7.3304	5.8244	1.9799	2.1832	4.5402	5.1002	1.9482	1.9643	3.9038	2.2948	2.1051	2.3196
ENSG00000070444	MNT	chr17:2287353-2304412	protein_coding	8728	1.633	1.8618	0.8856	1.0371	3.1902	2.909	2.3329	2.2498	2.4578	2.0323	1.1476	1.0098	1.8288	0.8581	1.093	1.1167	0.7199	0.8653	0.5442	0.5352
ENSG00000070476	ZXDC	chr3:126156443-126194762	protein_coding	7357	4.3869	4.1508	3.2721	3.4119	3.8641	3.9186	2.9174	2.8574	4.0187	4.911	3.0085	3.8075	4.6578	4.6733	3.4034	3.1109	2.4444	2.0088	2.4031	2.1011
ENSG00000070495	JMJD6	chr17:74708918-74722866	protein_coding	5949	1.535	1.6744	2.3925	2.1475	1.6461	1.4507	2.3165	2.2383	2.2576	2.1573	2.2914	3.6004	3.0401	3.7769	7.8663	5.9317	3.2323	3.5421	4.8742	4.6541
ENSG00000070501	POLB	chr8:42195971-42229326	protein_coding	4106	5.8482	4.2149	7.7245	7.3562	5.3574	5.5134	8.4331	7.729	4.9518	4.539	6.5804	5.4993	4.8683	3.2316	5.6089	5.9873	2.0712	3.0315	5.0412	4.4869
ENSG00000070526	ST6GALNAC1	chr17:74620842-74639920	protein_coding	3448	0	0	0	0	0	0.0181	0	0	0	0	0	0	0	0	0.0194	0	0.0314	0	0	0
ENSG00000070540	WIPI1	chr17:66417088-66453654	protein_coding	3402	3.167	3.49	4.016	4.8025	1.1385	1.0846	1.5871	1.8875	3.6736	4.349	3.9064	4.5186	6.9734	6.4832	16.3335	13.084	15.731	11.4699	20.7527	20.5817
ENSG00000070601	FRMPD1	chr9:37650996-37746901	protein_coding	6724	0.0287	0.1272	0.0509	0.1241	0.0326	0.0372	0	0.0151	13.5239	14.8313	10.7979	13.3463	6.1525	9.1476	5.3566	5.9339	2.4973	1.9483	2.7122	2.4277
ENSG00000070610	GBA2	chr9:35736862-35749983	protein_coding	5079	14.3261	15.1354	16.4205	18.9406	10.4319	10.5274	12.1382	12.5166	9.255	9.6726	9.3216	11.1448	9.1976	10.9841	8.8249	9.7405	2.6662	8.9494	5.9343	6.0404
ENSG00000070614	NDST1	chr5:149865380-149937773	protein_coding	9043	10.91	11.0766	8.4214	8.6147	9.5038	8.3815	5.2698	5.1239	15.9965	15.9815	8.6664	10.3015	9.6191	6.6192	4.0311	4.7057	23.6482	9.7281	13.387	14.4642
ENSG00000070669	ASNS	chr7:97481429-97501854	protein_coding	4455	12.396	13.5852	23.7719	26.5074	56.4468	38.9115	50.6443	39.054	6.469	7.3944	7.7648	18.6485	11.5542	12.1387	12.7359	15.9492	1.6657	4.7509	15.9594	14.3443
ENSG00000070718	AP3M2	chr8:42010463-42029191	protein_coding	6276	5.5659	4.3848	7.6169	6.1988	5.8339	5.58	7.8414	7.7868	5.3053	5.7178	5.87	5.6281	4.06	5.3842	4.1496	5.7127	3.4437	4.7466	5.961	5.1852
ENSG00000070729	CNGB1	chr16:57917502-58005020	protein_coding	6039	0	0	0	0.0106	0	0	0.0044	0	0	0.0135	0.0162	0.017	0.1212	0.0098	0.0277	0.0504	0	0	0	0.0087
ENSG00000070731	ST6GALNAC2	chr17:74559791-74583038	protein_coding	7558	0.0128	0.0133	0.0528	0.0255	0.0387	0.0165	0.0675	0.0671	0.0123	0	0.0129	0.009	0.1163	0.1951	0.062	0.0806	0.602	0.148	0.3685	0.3993
ENSG00000070748	CHAT	chr10:50817140-50901925	protein_coding	3100	0	0	0	0.0104	0	0	0	0	0	0	0.0315	0.011	0.0709	0.019	0	0	0	0	0	0
ENSG00000070756	PABPC1	chr8:101698043-101735037	protein_coding	4752	152.672	141.717	143.489	167.018	230.915	233.406	270.08	263.994	102.668	99.0472	121.85	104.862	64.5455	49.4543	64.7148	70.092	20.9623	36.8974	54.3442	52.5597
ENSG00000070759	TESK2	chr1:45809554-45956872	protein_coding	3460	2.6252	3.2716	3.5942	3.8592	3.6329	3.3256	5.4424	5.4895	0.7548	0.7796	0.9179	0.5924	1.0158	0.1534	0.7062	0.6162	0.1409	0.2291	0.5508	0.5385
ENSG00000070761	C16orf80	chr16:58147495-58163354	protein_coding	2371	11.0242	9.7181	14.6642	13.741	11.8976	12.8976	14.1282	14.4965	13.7284	12.9974	13.8067	22.015	15.3791	20.0473	19.7653	17.7825	9.8007	11.4829	15.9766	16.9351
ENSG00000070770	CSNK2A2	chr16:58191810-58231824	protein_coding	6905	16.0723	15.7303	19.6167	20.7188	18.5427	17.7963	24.3224	23.7483	12.9803	13.2114	15.3406	13.4763	10.6994	12.6743	13.5495	14.7011	4.1106	5.0839	8.6663	8.4946
ENSG00000070778	PTPN21	chr14:88932121-89021077	protein_coding	7396	3.1487	2.7617	2.7227	2.9382	2.2035	2.0631	2.132	2.0883	5.1576	5.935	5.5888	6.3185	13.3056	17.215	18.6514	16.3372	9.4477	7.6334	9.5339	9.201
ENSG00000070785	EIF2B3	chr1:45316449-45452282	protein_coding	3043	8.034	6.1998	9.9168	11.0652	6.1961	6.9667	10.814	10.34	6.7735	5.9903	7.98	10.631	5.9433	7.6744	9.5923	11.8108	6.7286	7.078	11.1284	10.2371
ENSG00000070808	CAMK2A	chr5:149599053-149669854	protein_coding	6150	0.0707	0.0573	0.0278	0.0835	0.5823	0.6203	0.7076	0.9232	0.7431	0.7177	0.7547	1.2387	6.691	7.8918	10.2272	7.358	2.5102	3.6917	1.2347	1.4893
ENSG00000070814	TCOF1	chr5:149737201-149779871	protein_coding	11278	22.4182	17.085	15.2703	16.1574	14.3466	13.1638	11.1853	10.2517	8.9313	8.096	6.3814	7.0393	4.3563	3.2577	2.7692	3.4491	1.5177	2.1619	2.5997	2.4108
ENSG00000070831	CDC42	chr1:22379119-22419437	protein_coding	3470	48.7884	40.9723	92.0857	81.5876	41.1737	41.3064	72.3901	73.0282	57.7338	52.9558	78.8789	106.322	48.1736	62.7798	73.1217	71.2352	48.7345	47.4123	136.06	134.517
ENSG00000070882	OSBPL3	chr7:24836157-25021253	protein_coding	8100	3.054	1.9565	2.5776	2.6154	1.6872	1.6059	1.7776	1.9444	1.0133	1.4532	1.3874	2.1804	1.4373	1.558	2.0787	1.3161	2.5211	4.6044	5.8385	5.508
ENSG00000070886	EPHA8	chr1:22890056-22930087	protein_coding	5358	0.5771	0.9483	0.6122	0.6949	0	0	0	0.0063	0	0.0153	0.0456	0.0319	0.0683	0.033	0	0.0244	0.0404	0.0174	0	0
ENSG00000070915	SLC12A3	chr16:56899118-56949762	protein_coding	6180	0	0	0	0.0104	0	0	0	0	0.0604	0.0132	0.0395	0.0608	0.0237	0	0	0.007	0.0263	0.0151	0.0285	0.017
ENSG00000070950	RAD18	chr3:8817087-9005457	protein_coding	6983	5.1754	4.0057	5.3099	5.4654	5.0548	4.6479	5.3279	5.2609	4.1938	4.179	3.5894	3.7179	1.7196	0.9036	0.9779	1.0219	0.5275	0.701	1.352	1.4093
ENSG00000070961	ATP2B1	chr12:89981827-90103077	protein_coding	9491	9.0511	5.9951	12.2583	9.5271	9.1476	9.251	12.8441	13.3641	19.182	19.5334	21.014	26.0012	42.5544	69.1258	54.6072	60.4598	20.0379	31.7952	47.6874	44.9003
ENSG00000070985	TRPM5	chr11:2425744-2444275	protein_coding	3962	0	0.0254	0	0.0162	0.2951	0.363	0.1898	0.2644	0.0471	0.0619	0.037	0.0431	0.0185	0.0298	0.0338	0.0549	0	0	0	0.0132
ENSG00000071051	NCK2	chr2:106361353-106510730	protein_coding	2990	10.6325	11.6435	8.3278	8.2018	9.5567	8.0314	5.9386	6.9854	10.9799	10.7441	6.7651	9.9055	10.0403	10.7295	6.2358	8.3384	8.5507	12.7229	8.5408	8.9264
ENSG00000071054	MAP4K4	chr2:102313311-102511149	protein_coding	11918	17.1482	15.5132	19.7034	17.8861	11.4422	10.8985	10.8461	10.3591	33.9008	30.2058	31.9114	30.3085	23.4443	22.8954	32.6678	31.4705	17.9253	30.2061	43.0268	40.8413
ENSG00000071073	MGAT4A	chr2:99235568-99347589	protein_coding	9630	0.6723	0.6374	1.167	1.0799	0.0911	0.0455	0.0363	0.0526	0.6683	0.6451	1.1568	0.972	1.0265	0.2511	1.5468	1.3464	0.4725	0.1162	0.0365	0.0491
ENSG00000071082	RPL31	chr2:101618176-101640494	protein_coding	5791	62.5984	58.8404	134.958	126.654	78.3305	82.1362	182.863	185.891	98.9355	93.2323	202.389	192.099	74.7124	112.019	197.768	213.926	23.5431	60.9653	108.928	112.281
ENSG00000071127	WDR1	chr4:10075962-10118573	protein_coding	7827	26.4198	26.874	32.3925	32.8695	12.6423	12.7438	13.7832	14.3788	13.3697	13.9631	10.8431	20.2948	10.2342	19.3186	10.8073	8.3942	19.8342	20.0487	46.9812	46.9286
ENSG00000071189	SNX13	chr7:17830384-17980124	protein_coding	16417	3.4462	2.8959	4.6457	4.6534	3.4232	3.4893	4.1774	4.2182	4.6812	4.6704	6.2082	4.969	4.5849	3.5742	5.2483	5.1629	2.534	3.0442	4.4558	4.2986
ENSG00000071203	MS4A12	chr11:60260250-60274903	protein_coding	1839	0	0.0547	0	0.0175	0	0	0	0	0	0	0	0.0372	0	0	0	0	0.0589	0	0.0159	0
ENSG00000071205	ARHGAP10	chr4:148653213-148993931	protein_coding	10759	1.1406	0.7949	0.9862	1.1397	8.0899	7.5097	7.9747	8.8081	3.1727	3.8064	3.8328	4.1752	5.6826	7.1311	10.0867	7.4332	4.2391	3.5011	7.1343	6.9397
ENSG00000071242	RPS6KA2	chr6:166822851-167319939	protein_coding	8243	2.3445	1.8859	1.4533	1.6978	1.1437	0.8497	0.3259	0.3075	1.584	2.1321	1.3159	1.5789	2.9135	1.345	1.2548	1.2827	0.6243	2.562	2.5574	2.7508
ENSG00000071243	ING3	chr7:120590802-120617270	protein_coding	5214	1.8255	1.8043	3.7198	3.1335	3.0696	2.5187	3.8331	4.3818	4.1678	3.6372	5.6037	9.2904	2.7524	4.298	4.4683	4.9152	0.8934	1.1177	2.3898	2.1845
ENSG00000071246	VASH1	chr14:77228531-77249354	protein_coding	6498	1.7771	1.5252	1.9884	1.887	2.2718	2.1654	2.7656	3.0062	4.3777	5.1073	6.0529	7.3127	5.2059	3.2218	5.5584	5.5243	9.653	13.2153	20.1327	19.3094
ENSG00000071282	LMCD1	chr3:8543392-8609805	protein_coding	2578	1.9116	1.971	2.4783	3.0131	0.1417	0.0485	0.2501	0.5506	2.858	3.5195	4.8518	5.1281	6.0212	10.7972	11.0628	10.8018	7.0387	1.0308	7.7449	7.3499
ENSG00000071462	WBSCR22	chr7:73097354-73119491	protein_coding	7944	4.7561	3.0145	5.5831	5.2811	2.815	2.7001	4.1052	4.2459	3.2639	3.0972	4.3238	4.6356	2.3227	2.7541	3.4763	3.5492	2.932	3.216	4.8275	5.332
ENSG00000071537	SEL1L	chr14:81937892-82000205	protein_coding	9559	4.7714	4.342	5.9617	5.957	5.8945	5.7178	7.1407	6.8343	9.2398	8.9789	9.6809	11.7574	7.859	6.447	9.5845	11.3933	11.9451	8.4421	20.7311	19.5011
ENSG00000071539	TRIP13	chr5:892757-919472	protein_coding	3560	10.9252	7.8149	10.9763	10.8107	8.4166	7.29	8.8587	8.9428	7.8071	6.6588	6.1898	8.6457	1.7071	0.8945	0.3667	0.5744	0.35	0.4583	2.1989	2.2189
ENSG00000071553	ATP6AP1	chrX:153656977-153664862	protein_coding	4884	5.5596	5.4594	7.2065	7.4594	7.6612	6.4534	9.0863	8.1032	6.2445	7.6152	6.8327	7.554	6.2216	4.9748	6.0519	5.9868	9.9372	7.8558	11.8441	12.1601
ENSG00000071564	TCF3	chr19:1609290-1652604	protein_coding	6061	31.3677	32.3138	21.0307	21.0883	29.2395	28.4668	19.6341	19.2208	38.7315	35.9418	23.9822	26.428	22.3491	16.4241	13.901	15.535	5.666	7.3918	8.8814	9.9113
ENSG00000071575	TRIB2	chr2:12857014-12882860	protein_coding	4588	9.5724	6.8643	7.5409	7.5349	9.4935	9.4731	10.1526	10.5191	11.1399	10.2445	10.5429	9.3964	23.9227	15.8615	19.7721	25.3972	3.6363	7.7428	12.5699	12.5786
ENSG00000071626	DAZAP1	chr19:1407567-1435719	protein_coding	9272	16.8936	16.4623	14.9534	14.3668	11.7676	11.6008	10.0359	9.8489	8.5099	8.049	5.9757	6.2375	4.9277	4.2551	4.0218	4.4956	1.887	2.8107	4.2246	4.6136
ENSG00000071655	MBD3	chr19:1576638-1592882	protein_coding	5173	8.8728	10.2116	5.5799	5.417	9.098	8.148	6.4132	6.8926	11.9175	12.4518	6.0732	10.2027	7.6858	10.7047	5.2479	6.7626	8.7643	5.7317	7.1243	7.4425
ENSG00000071677	PRLH	chr2:238475216-238475818	protein_coding	264	0	0	0	0	0	0	0	0	0	0	0	0	0	0	0	0	0	0	0	0
ENSG00000071794	HLTF	chr3:148747913-148804341	protein_coding	6024	19.3773	20.7701	36.2876	39.7182	10.1541	9.5922	16.8606	16.6964	13.0827	11.534	18.817	14.4378	8.6785	4.6207	9.3687	10.9211	3.3719	5.2393	11.4376	10.4209
ENSG00000071859	FAM50A	chrX:153672472-153679002	protein_coding	2567	8.8838	8.8585	13.0557	12.9294	10.7614	10.4755	15.9691	17.0103	10.3912	9.5849	12.2957	13.5738	12.4649	13.3016	24.0068	23.0353	11.2891	15.7094	23.163	23.9845
ENSG00000071889	FAM3A	chrX:153733349-153744566	protein_coding	6240	1.8273	2.201	1.9106	2.3405	1.8387	2.0244	1.9501	1.8848	2.6605	2.633	2.4978	2.1022	3.0743	2.4005	2.2584	2.573	1.7101	1.412	2.4198	2.4141
ENSG00000071894	CPSF1	chr8:145618443-145634753	protein_coding	6096	15.6453	16.6872	9.7461	12.5477	27.3213	26.9185	23.2317	24.5492	19.8742	16.9626	13.1606	12.9	10.9783	6.9653	6.6278	7.78	4.0785	4.3668	4.7422	5.3297
ENSG00000071909	MYO3B	chr2:171034654-171511681	protein_coding	8236	0.4106	0.2566	0.3948	0.3196	0.213	0.2354	0.1011	0.1108	0	0.0199	0.0534	0.0332	0.2311	0.0644	0.1463	0.1743	0	0.0396	0.0036	0
ENSG00000071967	CYBRD1	chr2:172378756-172414643	protein_coding	5176	1.6055	1.3024	1.9232	1.6806	0.9177	1.0028	1.3442	1.2471	5.3877	7.233	9.0148	6.679	10.9067	8.7844	13.5228	16.737	26.7799	20.6798	38.6089	37.064
ENSG00000071991	CDH19	chr18:64168319-64271375	protein_coding	6864	0.0141	0	0	0.0047	0	0	0	0.0098	0	0	0	0.005	2.5708	0.0344	0	0.0317	0	0	0	0
ENSG00000071994	PDCD2	chr6:170884382-170893780	protein_coding	6476	7.0727	6.7431	10.5836	10.1708	7.5496	7.5998	10.3079	10.5628	7.8778	7.4219	8.9555	9.0308	5.5401	5.91	6.9832	7.1555	2.9526	4.0961	6.4605	6.2652
ENSG00000072041	SLC6A15	chr12:85253491-85307394	protein_coding	8556	2.5298	2.158	2.3735	3.2226	2.4258	2.0977	3.5635	3.006	0.8939	0.6497	1.1478	0.6468	0.736	0.0482	0.1135	0.0712	0.019	0.8718	0.4044	0.3865
ENSG00000072042	RDH11	chr14:68143517-68162531	protein_coding	5518	13.2914	11.9345	20.4485	21.6394	12.0653	11.5825	16.6444	15.7775	9.854	9.3475	12.9542	15.9289	9.1028	10.9759	9.5302	10.2982	5.1143	7.646	19.5213	18.2823
ENSG00000072062	PRKACA	chr19:14202499-14228896	protein_coding	6144	3.3342	3.087	1.3927	1.4733	4.4129	4.1324	1.7751	1.8153	6.1783	6.8518	2.3937	2.6355	7.651	6.2774	4.6582	3.9517	7.6084	4.9473	2.8966	3.1993
ENSG00000072071	LPHN1	chr19:14260749-14316999	protein_coding	6292	24.3725	25.3625	11.2966	14.8963	8.8157	8.7662	6.0838	5.9407	9.3533	9.9774	6.0802	4.262	7.4943	1.0966	1.7343	1.5698	1.7562	1.2966	1.2209	1.3639
ENSG00000072080	SPP2	chr2:234959322-234985778	protein_coding	1265	0.1528	0.3182	0.0225	0.1015	0.1155	0.0494	0	0.0802	0.1475	0.1939	0	0.081	0.2315	0.1399	0	0	0	0	0.0232	0.0622
ENSG00000072110	ACTN1	chr14:69340859-69446157	protein_coding	10626	24.5076	19.3738	16.4167	18.7377	7.5653	7.5743	8.4234	8.8674	8.8123	9.6851	7.1316	9.2491	4.3618	3.6851	3.0809	3.0424	21.2824	11.1438	26.7973	27.222
ENSG00000072121	ZFYVE26	chr14:68194090-68283307	protein_coding	15706	3.9991	3.5395	3.4813	3.5193	2.6802	3.3566	2.6955	2.6037	3.9608	3.6744	2.2398	2.834	3.3007	3.4356	2.2421	2.0196	2.2969	2.8466	2.2625	2.4379
ENSG00000072133	RPS6KA6	chrX:83318983-83442933	protein_coding	2890	4.447	4.1953	5.8328	6.1309	5.1333	5.215	6.9155	6.8412	1.8072	1.3859	1.437	1.0402	2.6096	0.5101	0.8224	0.5872	2.043	1.7422	1.4406	1.3349
ENSG00000072134	EPN2	chr17:19118927-19240028	protein_coding	9844	4.6283	4.712	5.2734	5.028	3.66	4.0721	4.3962	4.3877	4.4151	4.6999	4.7996	3.7617	3.8306	2.3124	3.414	3.5007	1.1775	1.8233	2.4572	2.722
ENSG00000072135	PTPN18	chr2:131113579-131132982	protein_coding	5774	1.4811	1.4812	1.4968	1.74	2.7465	2.7185	3.787	4.1675	2.6814	2.4775	2.3863	1.9701	1.6866	0.5822	0.771	0.957	0.319	0.331	1.0765	1.1863
ENSG00000072163	LIMS2	chr2:128395955-128439360	protein_coding	8487	0.1708	0.2134	0.0975	0.1551	0.0517	0.0442	0.0538	0.0478	0.3846	0.4623	0.2245	0.2254	1.2337	1.8066	0.8362	0.7844	1.4871	0.7635	0.7876	0.9957
ENSG00000072182	ASIC4	chr2:220378891-220403494	protein_coding	5250	0.0276	0.0575	0.0326	0.0428	0.2366	0.0953	0.1075	0.1416	0.4974	0.7162	0.5305	0.4815	1.3807	1.7973	0.9691	2.2128	0.1341	0.4973	0.2401	0.3599
ENSG00000072195	SPEG	chr2:220299567-220363009	protein_coding	17910	1.7427	1.9803	1.1307	1.3298	2.0851	2.1718	1.5029	1.4341	4.2441	5.1665	4.0211	2.4681	9.3008	7.8137	6.7583	8.2576	3.6414	3.7197	3.4067	3.7307
ENSG00000072201	LNX1	chr4:54325467-54567572	protein_coding	5725	0.5908	1.0106	1.1459	1.4858	0.1532	0.1748	0.1877	0.2479	0.3258	0.2713	0.495	0.2625	0.6778	1.0404	0.7016	0.8664	0.3122	0.0489	0.1127	0.0963
ENSG00000072210	ALDH3A2	chr17:19551448-19580911	protein_coding	6457	13.6258	11.282	20.2047	17.0758	6.8587	7.3122	9.4438	10.2536	7.4099	6.9121	9.2543	9.8509	3.2432	1.9454	2.758	2.9582	2.5418	2.8014	3.5372	3.2515
ENSG00000072274	TFRC	chr3:195754053-195809060	protein_coding	7887	19.7193	18.9449	41.0714	33.2055	23.0723	25.1588	43.7972	38.3175	19.6773	16.9558	17.7484	34.1998	7.7983	13.0702	7.3764	6.8795	23.3713	15.1675	25.81	24.2108
ENSG00000072310	SREBF1	chr17:17713712-17740325	protein_coding	8039	2.9269	2.7974	1.2347	1.5772	6.1908	6.5811	3.9597	3.6323	4.5131	4.8706	1.7139	2.3244	2.4046	1.3718	1.6156	1.9701	4.939	2.7488	3.0745	3.307
ENSG00000072315	TRPC5	chrX:111017542-111326004	protein_coding	5839	0.3972	0.4739	0.4103	0.4948	0.5006	0.332	0.2944	0.1968	0	0	0.0084	0.0176	0.1129	0.0303	0.0057	0	0	0	0	0
ENSG00000072364	AFF4	chr5:132211070-132299326	protein_coding	11297	13.4463	11.356	12.0382	12.3939	10.3116	11.2706	10.4793	11.2008	20.8956	21.6711	21.9795	21.7961	25.0182	23.2196	36.9348	30.177	16.8633	19.6267	27.91	26.8177
ENSG00000072401	UBE2D1	chr10:60094734-60130513	protein_coding	3486	9.5216	7.3314	15.2758	13.9038	5.5135	5.1306	8.0681	8.1341	5.8057	5.8387	7.106	7.8689	5.02	3.6033	3.5913	4.2937	4.4129	4.9749	7.2331	7.0315
ENSG00000072415	MPP5	chr14:67707825-67802536	protein_coding	8743	3.9622	3.2109	5.174	4.9012	5.2911	5.1714	6.5843	6.6372	4.0857	4.3568	5.0072	4.9231	3.5341	3.3996	4.3915	4.2899	2.8065	2.4528	6.6197	6.2045
ENSG00000072422	RHOBTB1	chr10:62629195-62761198	protein_coding	4841	4.7806	3.5438	5.4146	5.2315	4.7704	4.7409	5.3936	4.7194	12.7348	11.7691	13.4335	11.0506	10.4212	7.6746	12.6884	12.3765	5.0016	4.7188	7.9279	7.4379
ENSG00000072444	ASAH2C	chr10:48001602-48055018	protein_coding	2055	0	0	0	0	0	0	0	0	0	0	0	0	0	0	0	0	0	0.0227	0.0285	0
ENSG00000072501	SMC1A	chrX:53401069-53449677	protein_coding	10674	17.214	15.7941	20.2629	21.2517	19.2937	18.0918	21.6583	20.5839	16.392	14.7877	17.028	19.6087	8.3551	6.2818	5.8926	6.779	2.649	3.5203	5.3068	4.9026
ENSG00000072506	HSD17B10	chrX:53458205-53461320	protein_coding	1115	28.729	25.3126	52.1079	46.0319	25.0375	25.9119	40.1857	37.7978	25.5123	28.8847	34.7931	59.9575	18.5842	33.9557	14.5904	22.1262	15.157	20.8638	29.8451	28.6918
ENSG00000072518	MARK2	chr11:63606399-63678491	protein_coding	6154	7.4977	7.2104	4.4123	5.0594	4.3345	4.4103	3.0512	3.026	4.3951	3.6926	2.2072	2.4813	4.0096	3.3923	1.5013	1.7817	2.0948	2.5908	2.1582	1.8807
ENSG00000072571	HMMR	chr5:162887208-162918947	protein_coding	3932	22.5232	15.4945	33.8759	30.523	17.0621	15.3796	22.75	19.7434	10.3893	9.3343	9.8663	6.125	3.0353	1.2149	1.5068	2.1468	0.0827	0.2253	2.0207	1.8021
ENSG00000072609	CHFR	chr12:133398772-133532890	protein_coding	9214	3.2563	3.4399	3.238	3.2294	2.1256	2.0701	2.0583	2.7216	1.9536	2.6881	1.8453	2.3135	2.535	2.5537	2.2125	2.517	1.8459	1.9277	2.6284	2.7742
ENSG00000072657	TRHDE	chr12:72481045-73059422	protein_coding	6835	0.1626	0.2355	0.3464	0.371	0.2032	0.1464	0.1729	0.1533	1.1872	1.3155	1.88	0.7697	0.9641	0.0431	0.0294	0.0828	0.4993	1.9848	2.8912	2.4727
ENSG00000072682	P4HA2	chr5:131527530-131631008	protein_coding	8502	1.182	1.6924	3.0193	2.7221	3.0601	4.0382	6.8658	4.8974	3.5872	6.884	8.8041	8.7471	7.2686	10.9664	17.0244	13.5825	24.6943	4.299	31.8194	30.4698
ENSG00000072694	FCGR2B	chr1:161551100-161648444	protein_coding	6996	0	0	0	0.0046	0	0	0	0	0.0133	0.0117	0.021	0.0195	0.0733	0.0169	0.0383	0.0311	0	0	0	0
ENSG00000072736	NFATC3	chr16:68118653-68263162	protein_coding	8806	5.333	3.9877	4.8973	4.5272	7.577	7.3856	6.8484	6.7816	9.458	9.1805	8.7887	9.1822	6.7683	7.4269	8.0283	7.046	2.3497	3.0706	3.6824	3.5435
ENSG00000072756	TRNT1	chr3:3168599-3192563	protein_coding	5518	4.9996	3.5284	7.0453	6.8118	4.2911	3.8533	4.6248	5.0652	4.5298	4.4145	5.8528	5.5779	4.0339	4.0933	5.7569	7.357	1.3645	2.4923	4.6651	4.1901
ENSG00000072778	ACADVL	chr17:7120443-7128592	protein_coding	4865	24.083	22.4815	25.7142	27.7307	15.6827	17.1605	20.7779	19.4097	17.5222	18.5999	21.954	19.7311	20.4686	14.9341	15.7702	19.3184	24.5504	18.0345	31.549	32.6903
ENSG00000072786	STK10	chr5:171469076-171615390	protein_coding	9083	2.0054	2.1712	1.837	2.2405	1.3195	0.9777	1.2362	1.3097	1.3965	1.1969	1.0758	1.2637	1.2979	0.6882	0.6044	0.6227	2.5047	4.4295	7.2338	7.2003
ENSG00000072803	FBXW11	chr5:171288552-171433877	protein_coding	5577	15.0308	15.7233	24.4004	24.4782	12.4881	12.1776	18.4191	17.7801	14.7333	15.9175	20.0448	19.7235	15.8467	16.8131	26.3134	22.3992	10.6547	11.9872	19.6565	20.0982
ENSG00000072818	ACAP1	chr17:7239847-7254797	protein_coding	7421	0.9571	1.1118	1.1031	1.2846	0.0985	0.1264	0.1774	0.164	0.0503	0.022	0.0658	0.0737	0.0691	0.0397	0.0631	0.1114	0.1022	0.0188	0.1304	0.1026
ENSG00000072832	CRMP1	chr4:5749810-5894785	protein_coding	5823	10.4629	11.3699	13.5779	12.1658	16.7171	16.0449	15.3482	11.6835	10.7954	15.3293	11.9736	14.2439	12.172	8.416	3.2364	3.9379	16.2324	7.894	19.0074	19.0869
ENSG00000072840	EVC	chr4:5712923-5830772	protein_coding	7923	2.8905	2.7685	1.728	2.0176	3.8648	3.6702	2.7565	2.6916	6.3213	7.2116	4.8656	3.3889	5.5541	2.7987	3.1095	3.3884	3.5004	3.7187	3.4896	3.584
ENSG00000072849	DERL2	chr17:5374570-5390131	protein_coding	6386	3.8585	3.0331	6.0252	5.0867	3.6048	2.9966	4.2906	4.4297	6.6306	5.4273	5.7918	8.9976	4.3111	4.2664	5.8813	6.2889	2.6973	3.4457	7.7499	7.0028
ENSG00000072858	SIDT1	chr3:113251142-113348425	protein_coding	8072	0	0	0.0035	0.004	0	0	0	0	0	0.0304	0.0182	0.0085	0.0272	0.0073	0	0	0	0	0	0.0033
ENSG00000072864	NDE1	chr16:15737123-15820210	protein_coding	8035	4.2272	2.8614	3.8018	3.6633	3.0469	3.0198	3.838	3.2682	4.0162	3.5606	4.1167	2.4446	2.0412	0.6679	0.6791	1.0451	0.3236	0.673	1.3282	1.1432
ENSG00000072952	MRVI1	chr11:10594637-10715535	protein_coding	7702	0.941	1.0908	0.8517	0.9752	1.0153	1.1124	1.2451	1.0312	0.9687	0.8384	0.793	0.4169	0.7415	0.3063	0.3998	0.6666	1.491	0.2966	2.2231	2.0479
ENSG00000072954	TMEM38A	chr19:16771937-16800840	protein_coding	3005	0.7878	1.3393	1.6231	1.88	0.4134	0.4578	0.5811	0.6186	3.0416	4.6244	5.3818	6.5707	19.8585	40.1133	37.0942	35.9817	50.5256	27.9407	19.1624	18.6983
ENSG00000072958	AP1M1	chr19:16308388-16346160	protein_coding	3813	6.1708	5.0006	4.5032	4.2007	9.2189	8.5284	7.3691	7.5606	10.1999	10.4831	7.6883	9.9445	8.9293	7.6403	7.3918	7.3717	6.5205	6.37	7.8738	7.9358
ENSG00000073008	PVR	chr19:45147097-45166850	protein_coding	3519	6.8923	7.1053	5.852	7.2242	5.7318	5.9178	4.626	5.3687	8.7727	10.7317	8.3168	9.5619	7.3657	9.4517	5.8025	6.4667	16.8704	8.7966	26.928	26.3185
ENSG00000073009	IKBKG	chrX:153769413-153796782	protein_coding	7462	0.7899	0.7214	0.9747	0.8861	0.5582	0.6369	0.828	0.7835	0.8624	0.953	0.7072	0.8332	0.7065	0.6006	0.5428	0.6997	0.4646	0.4311	0.9194	0.9039
ENSG00000073050	XRCC1	chr19:44047191-44084625	protein_coding	3459	8.0036	9.2648	10.4393	10.5139	18.2121	16.0725	20.4713	19.0235	14.5872	14.2736	16.5972	12.7498	9.8008	7.1606	8.2838	8.0129	2.5369	3.5177	4.2466	4.5978
ENSG00000073060	SCARB1	chr12:125261401-125367214	protein_coding	8240	3.137	3.2786	2.4438	3.0385	3.1219	3.0737	2.7026	2.6004	3.0787	3.3233	2.6564	2.3216	1.8483	0.8302	1.3893	1.4257	0.9269	0.6959	1.5514	1.5097
ENSG00000073067	CYP2W1	chr7:1022834-1029276	protein_coding	2773	0.0348	0.0181	0	0.0116	0	0	0	0	0.0673	0.0884	0.1057	0.0493	0.3961	0.1276	0.3742	0.2824	0.0195	0.1681	0	0.0568
ENSG00000073111	MCM2	chr3:127317065-127341276	protein_coding	4899	39.8138	35.3058	42.152	37.006	45.1253	44.1035	41.6348	43.1997	28.3854	25.5121	22.8389	34.7884	9.1918	4.7068	2.6511	3.2684	1.8244	1.6368	3.9619	3.9481
ENSG00000073146	MOV10L1	chr22:50528307-50600119	protein_coding	6872	0.007	0.0073	0	0	0.0425	0.0091	0.0313	0.0148	0	0.0119	0.0853	0.0447	0.0426	0.0172	0.0146	0.0127	0.0788	0.0204	0.0469	0.0573
ENSG00000073150	PANX2	chr22:50609159-50618723	protein_coding	3102	1.1059	1.6381	0.4046	0.5795	0.1649	0.2218	0.1299	0.0763	0.0301	0.0791	0.0315	0.0661	0.2124	0.038	0.0432	0.0421	0.2794	0.0902	0.1134	0.1184
ENSG00000073169	SELO	chr22:50639407-50656045	protein_coding	2363	3.803	4.62	2.4986	2.839	5.8143	6.2986	4.0243	5.0774	3.9075	5.5694	3.4737	2.7612	2.9747	2.0215	2.3374	2.983	2.4298	2.1505	2.556	2.8654
ENSG00000073282	TP63	chr3:189349204-189615068	protein_coding	7454	0.0065	0.0202	0.0115	0	0.0196	0.0503	0.0108	0.0136	0.2377	0.5154	0.6227	0.7103	11.3946	9.4227	19.4179	17.8154	1.1845	3.0771	3.7406	3.7954
ENSG00000073331	ALPK1	chr4:113206664-113363776	protein_coding	12325	0.0431	0.0204	0.0486	0.0599	0.0296	0.0457	0.0371	0.0631	1.5589	2.1223	2.553	1.1475	2.0615	1.0335	2.0152	3.0855	1.3229	1.0856	1.7889	1.6524
ENSG00000073350	LLGL2	chr17:73521160-73571289	protein_coding	7909	5.5591	6.3101	4.0896	5.134	0.6838	0.68	0.6929	0.6153	0.059	0.093	0.0432	0.2419	0.2407	0.0522	0.1947	0.1595	0.0548	0.1002	0.0259	0.0299
ENSG00000073417	PDE8A	chr15:85523670-85682376	protein_coding	7886	1.5194	1.5694	1.2225	1.7136	1.2418	1.475	1.4511	1.3886	2.7438	2.9853	3.6369	2.3262	2.3862	1.4807	2.0205	2.1022	1.0647	2.6248	3.4762	3.3512
ENSG00000073464	CLCN4	chrX:10125023-10205700	protein_coding	6750	2.5195	2.0571	2.5227	2.4918	2.1545	2.1679	2.2485	1.8275	3.9655	4.8924	4.5964	3.9677	4.2414	3.9927	4.2351	5.1375	5.1519	5.9397	4.9256	4.8133
ENSG00000073536	NLE1	chr17:33455771-33469334	protein_coding	5463	5.3241	5.6452	7.8315	7.6794	9.3374	9.215	12.0669	11.3831	5.1729	5.2669	6.1443	5.2276	3.4848	3.0334	3.2536	3.1938	1.1105	1.7067	2.9464	2.9832
ENSG00000073578	SDHA	chr5:218355-256815	protein_coding	8383	7.3369	7.3156	8.3359	9.8176	10.3915	10.1828	14.4552	13.276	8.945	7.9373	10.3803	9.8045	7.7736	6.9785	14.8303	11.2216	8.6843	8.0248	10.4399	10.4876
ENSG00000073584	SMARCE1	chr17:38781213-38804760	protein_coding	11023	5.4263	4.5868	9.7602	8.3806	8.1017	8.0617	11.9436	10.8047	10.8809	9.3882	14.2105	16.177	7.2071	7.4204	9.9271	10.5314	3.1351	4.242	9.0407	8.3139
ENSG00000073598	FNDC8	chr17:33448597-33457751	protein_coding	1388	0	0	0.0205	0	0	0	0	0	0	0	0.0352	0	0	0	0	0	0	0	0	0
ENSG00000073605	GSDMB	chr17:38060847-38076107	protein_coding	5917	1.8617	2.4997	2.1547	2.4791	1.6797	1.913	2.8375	2.5303	1.6708	1.5334	2.6176	0.6408	2.7595	0.4684	6.8792	5.6549	0.2472	0.3388	0.7036	0.6786
ENSG00000073614	KDM5A	chr12:389294-498620	protein_coding	12091	8.835	7.8225	9.6789	9.058	7.5915	8.1409	8.1248	7.9132	15.1034	15.5967	12.0663	10.5553	13.7951	11.618	12.1094	11.7567	5.806	7.6266	8.6932	8.426
ENSG00000073670	ADAM11	chr17:42836398-42859214	protein_coding	4770	1.2762	1.2656	1.2079	1.3997	1.3176	1.5601	1.4755	1.4171	1.0558	0.7712	1.0755	1.1459	0.9517	0.1731	0.5544	0.6841	0.0341	0.1075	0.0676	0.0605
ENSG00000073711	PPP2R3A	chr3:135684514-135866733	protein_coding	7839	6.8106	6.1098	8.3031	8.214	7.1412	6.2943	6.8708	6.5834	6.6984	6.3921	7.0556	6.297	6.0713	6.1613	5.1712	4.4682	4.9751	3.3958	5.4307	5.1591
ENSG00000073712	FERMT2	chr14:53323985-53419153	protein_coding	8510	25.9289	19.2724	32.5377	29.1301	10.5456	9.5899	11.0103	10.2145	18.9821	25.9539	29.2237	31.7683	12.1231	16.001	14.1055	14.2293	8.1791	12.3862	17.6673	16.8596
ENSG00000073734	ABCB11	chr2:169779447-169887832	protein_coding	5151	0	0.0098	0	0.0062	0	0	0.0052	0	0.0362	0.0317	0.0095	0.0332	0.0426	0.0114	0.0455	0.076	0	0.0091	0	0.0051
ENSG00000073737	DHRS9	chr2:169921298-169952677	protein_coding	3751	0	0	0.0076	0	0	0	0	0	0	0	0	0	0	0.0157	0	0	0	0.0124	0	0
ENSG00000073754	CD5L	chr1:157800703-157868046	protein_coding	2456	0	0	0	0	0	0	0	0	0	0	0	0	0.0596	0	0	0	0	0	0	0
ENSG00000073756	PTGS2	chr1:186640922-186649559	protein_coding	5269	0.0275	0.0668	0.0271	0.0426	0.111	0.0475	0.0714	0.0706	0.0177	0.1396	0.0742	0.201	0.8199	0.1567	0.0127	0.0413	0.1336	0.8229	2.4317	2.3111
ENSG00000073792	IGF2BP2	chr3:185361526-185542844	protein_coding	4735	32.2746	35.4343	21.8482	26.8448	33.5693	34.22	23.8106	23.1688	28.7186	31.0569	19.8842	14.5517	24.7109	16.627	15.977	16.6233	7.7103	10.082	9.641	9.123
ENSG00000073803	MAP3K13	chr3:185000728-185206885	protein_coding	12623	0.9148	0.7333	1.2789	1.1443	0.5153	0.5202	0.5597	0.5382	1.3152	1.4505	1.556	1.6021	1.9722	1.3829	1.127	1.3512	0.4248	0.2401	0.2973	0.3202
ENSG00000073849	ST6GAL1	chr3:186648273-186796341	protein_coding	9151	10.5067	11.6826	12.9818	14.8479	4.9274	4.1071	4.3622	4.4097	3.1187	2.2332	2.1784	2.3294	1.6723	0.5284	1.6241	1.1269	2.2493	1.1666	0.7273	0.7456
ENSG00000073861	TBX21	chr17:45810609-45823485	protein_coding	2614	0	0	0.0109	0	0.0559	0.0239	0	0	0.107	0	0.0748	0.0131	0.028	0	0.2689	0.1498	0.0829	0	0	0
ENSG00000073905	VDAC1P1	chrX:80184998-80185846	pseudogene	848	0.2279	0	0	0	0	0	0	0	0	0	0	0	0	0	0	0	0	0	0	0
ENSG00000073910	FRY	chr13:32605436-32870794	protein_coding	16059	1.2516	1.3722	1.1722	1.3112	0.1047	0.0857	0.0569	0.08	0.8654	1.0435	0.6541	0.6552	1.6095	1.1825	0.7129	1.2003	4.8706	4.0004	4.064	4.3699
ENSG00000073921	PICALM	chr11:85668726-85780924	protein_coding	5833	11.091	10.6	15.8724	14.5827	15.5984	15.4491	21.4377	20.1575	20.5784	20.39	24.9364	23.666	22.5448	20.544	35.9932	30.9866	18.5911	14.9218	35.9642	35.0894
ENSG00000073969	NSF	chr17:44668034-44834830	protein_coding	5009	4.3984	4.2184	7.5221	6.4018	3.808	4.7317	7.4705	6.9429	4.2453	5.2221	6.0672	9.7047	6.9727	12.4916	12.6972	10.2415	8.1212	8.7673	17.1853	15.9067
ENSG00000074047	GLI2	chr2:121493198-121750229	protein_coding	7341	8.556	7.9771	3.1199	3.8172	1.9711	1.9167	1.0685	1.0957	6.8479	6.1799	2.2097	2.1406	3.2117	0.5623	0.5517	0.6461	0.6272	1.0542	0.659	0.6685
ENSG00000074054	CLASP1	chr2:122095351-122407163	protein_coding	11099	10.8479	9.4962	10.8498	11.0822	9.0404	9.5954	9.5989	8.7879	13.7139	13.4187	14.6415	12.8345	14.7378	14.9836	13.1254	14.65	6.0028	10.7739	9.4121	9.0656
ENSG00000074071	MRPS34	chr16:1821890-1823156	protein_coding	1097	56.0225	46.4111	47.7628	46.8749	43.2355	40.9308	38.127	42.4231	29.7568	30.4019	23.9174	29.3652	17.0202	20.4282	17.3015	17.6107	17.9733	23.8835	22.0763	22.0813
ENSG00000074181	NOTCH3	chr19:15270443-15311792	protein_coding	8799	17.5876	19.1826	5.6695	8.8755	12.475	12.3097	4.787	4.4478	42.8226	44.5082	20.2345	15.5177	12.4822	2.0375	1.613	2.4972	3.1703	2.8664	2.9256	3.8595
ENSG00000074201	CLNS1A	chr11:77225980-77348850	protein_coding	4592	22.211	18.866	34.4108	32.4131	22.8695	22.6068	33.7247	32.4867	24.8805	22.4115	32.697	27.4283	13.8404	11.8408	16.1392	19.055	6.358	8.264	15.662	14.6136
ENSG00000074211	PPP2R2C	chr4:6322304-6565327	protein_coding	9198	0.9035	0.8423	0.9055	0.9003	0	0.0204	0.0117	0.022	0	0.0089	0.0266	0.052	0.0955	0.0577	0.0364	0.0946	0.0059	0.0101	0.0159	0.0171
ENSG00000074219	TEAD2	chr19:49843851-49865714	protein_coding	2980	39.1222	33.4607	51.8956	42.9668	28.7418	29.6313	27.5569	26.5157	41.4065	40.8986	35.6115	45.6471	24.4723	23.6881	15.9394	19.8574	7.198	14.2362	16.706	16.6358
ENSG00000074266	EED	chr11:85955585-85989855	protein_coding	7016	3.6773	2.7177	5.2931	4.3143	4.1978	4.4121	6.6774	5.8046	3.5493	3.5419	4.638	4.5282	2.4525	1.8912	3.7119	3.3489	0.7026	0.9436	2.0686	1.9488
ENSG00000074276	CDHR2	chr5:175969511-176022975	protein_coding	5348	0.009	0.0376	0.032	0.03	0.0273	0.0234	0.0502	0.019	0.0698	0.0153	0.064	0.0128	0.1095	0.011	0.025	0.0081	0.0304	0.0262	0	0.0049
ENSG00000074317	SNCB	chr5:176047084-176057530	protein_coding	1979	2.3437	2.0337	1.5566	1.6706	0.517	0.6636	0.4344	0.2732	0.0943	0	0.0988	0.0345	0.074	0.0298	0	0	0.1095	0.0471	0.0296	0.1326
ENSG00000074319	TSG101	chr11:18489882-18548779	protein_coding	3839	7.74	7.0111	11.4788	10.5183	7.1196	6.9231	9.3344	9.2349	8.6974	7.4737	9.8126	10.4912	9.9751	12.3507	14.3958	13.4647	8.8608	8.7677	13.0443	12.5922
ENSG00000074356	C17orf85	chr17:3714459-3749545	protein_coding	5717	10.0568	9.2839	11.879	10.1736	8.9226	8.729	9.764	9.3995	11.4034	9.3653	9.9906	8.8016	8.7987	6.0448	8.5075	7.6945	4.9742	3.9223	7.5439	7.3173
ENSG00000074370	ATP2A3	chr17:3827168-3867736	protein_coding	6866	1.2103	1.3995	1.0884	1.3417	0.9899	1.0565	1.115	0.9697	0.6792	0.7381	1.3165	0.5572	0.6505	0.1202	0.8434	0.9126	0.0552	0.0543	0.1922	0.2217
ENSG00000074410	CA12	chr15:63613576-63674360	protein_coding	7313	0.6409	0.5091	0.4836	0.7242	0.5996	0.6499	0.9881	0.9428	0.0255	0.0224	0.0601	0.0981	0.5507	0.0242	0.032	0.0119	1.874	1.1092	5.8133	5.7526
ENSG00000074416	MGLL	chr3:127407908-127542051	protein_coding	10056	0.0192	0.01	0	0.016	0.1744	0.1741	0.2003	0.2252	0.1855	0.439	0.6025	0.4484	2.0679	3.4366	2.4832	2.7389	4.8963	2.0677	3.8311	4.0582
ENSG00000074527	NTN4	chr12:96051582-96184930	protein_coding	4166	0.1972	0.2174	0.1917	0.262	0.5964	0.4653	0.5094	0.6166	0.3582	0.4513	0.7037	1.107	1.4764	0.0142	0.1125	0.0836	5.1618	5.1588	12.5764	11.755
ENSG00000074582	BCS1L	chr2:219523486-219528166	protein_coding	3379	3.5604	3.1118	5.9341	6.3551	3.6119	3.4794	7.465	7.1414	4.1955	5.2495	6.0297	8.6236	3.1637	3.9269	4.7749	5.4727	2.645	3.2147	5.1801	5.1727
ENSG00000074590	NUAK1	chr12:106457117-106533811	protein_coding	7008	2.9576	3.0941	3.4961	3.6734	2.2003	2.4629	2.8825	2.8743	1.9297	2.951	4.2041	4.8745	4.6181	3.9046	2.6605	3.4645	15.3504	15.2538	34.8166	36.0667
ENSG00000074603	DPP8	chr15:65734800-65810042	protein_coding	10211	3.5156	2.7542	4.5559	4.1872	3.0775	2.9826	3.9777	4.1274	4.5122	4.1307	5.6845	5.5167	4.2809	3.806	7.6514	7.0736	3.4428	3.1777	7.1008	6.7852
ENSG00000074621	SLC24A1	chr15:65903703-65953333	protein_coding	9084	1.5903	1.3181	1.3721	1.3463	1.2389	1.4044	1.2982	1.3431	0.9651	1.1518	0.7638	0.6355	1.0801	0.5064	0.4643	0.4694	0.4413	0.544	0.681	0.6587
ENSG00000074657	ZNF532	chr18:56529831-56653712	protein_coding	11951	17.8892	19.861	19.8233	22.8189	12.438	12.2289	11.1263	10.1071	10.8789	11.2104	11.5004	9.5928	10.3174	4.6385	4.9212	6.2549	4.0384	5.0166	6.4301	6.2234
ENSG00000074660	SCARF1	chr17:1537151-1549041	protein_coding	4957	0.4971	0.274	0.1611	0.2914	0.0885	0.0883	0.065	0.1023	0.1505	0.066	0.0493	0.0413	0.3397	0.0476	0.0743	0.0439	0.0109	0.1035	0.0296	0.0635
ENSG00000074695	LMAN1	chr18:56995054-57027194	protein_coding	6767	20.5055	17.7685	28.1853	29.5228	33.7487	33.121	54.6425	53.5044	21.0873	19.3635	28.7004	22.4339	14.6722	8.9065	21.696	22.331	20.2595	13.3514	52.5467	48.2296
ENSG00000074696	PTPLAD1	chr15:65822755-65870687	protein_coding	4469	53.7206	50.1291	79.6957	80.0416	43.4003	41.2244	57.837	56.8245	47.9375	45.8006	53.5932	56.4735	26.2637	18.0521	20.1038	23.25	9.4298	12.3304	29.5948	28.5988
ENSG00000074706	IPCEF1	chr6:154475630-154677926	protein_coding	8474	0.057	0.0416	0.0202	0.072	0.0172	0.059	0.0666	0.0279	0.1211	0.0772	0.0807	0.0564	0.0605	0.0766	0.0277	0.0257	0.0511	0.0165	0.0311	0.0279
ENSG00000074755	ZZEF1	chr17:3907738-4046314	protein_coding	15878	3.0611	2.9372	2.3155	2.438	2.7017	2.8554	2.2687	2.235	3.9532	4.4429	3.311	2.9776	4.2564	3.9927	4.9205	3.894	3.2818	3.3501	3.1668	3.2445
ENSG00000074771	NOX3	chr6:155716503-155777037	protein_coding	2042	0	0	0.014	0	0	0	0	0	0	0	0	0	0	0	0	0	0	0	0	0
ENSG00000074800	ENO1	chr1:8921060-8939308	protein_coding	3958	324.533	295.005	632.092	502.685	425.596	517.022	848.125	595.294	317.454	297.147	388.43	480.072	155.857	138.835	102.883	120.046	149.746	61.7786	393.232	402.047
ENSG00000074803	SLC12A1	chr15:48483860-48596275	protein_coding	12476	0.0039	0.0161	0.032	0.0283	0	0	0	0	0.0075	0	0.0352	0.0246	0.0176	0	0.0107	0	0	0	0	0
ENSG00000074842	C19orf10	chr19:4641385-4670382	protein_coding	1678	8.2349	7.8852	12.4595	10.7888	11.3236	11.1805	18.0419	18.6909	11.0608	10.4735	10.4532	17.2025	7.2435	6.6072	7.6204	9.0756	19.6912	8.5293	37.2518	38.1303
ENSG00000074855	ANO8	chr19:17434031-17445638	protein_coding	4979	4.978	5.2441	2.1597	2.6496	2.7594	2.6125	1.2409	1.3101	3.2032	3.3163	1.9626	1.825	3.5882	0.7343	1.1026	1.3021	1.1314	1.03	0.8303	0.9699
ENSG00000074935	TUBE1	chr6:112391979-112408732	protein_coding	6973	2.0856	1.7676	2.6874	2.8264	4.5066	3.9999	4.9349	4.7256	2.9961	2.5555	3.5875	2.9688	2.5306	1.7507	2.069	2.4773	0.5904	0.9026	1.5557	1.641
ENSG00000074964	ARHGEF10L	chr1:17866329-18024369	protein_coding	7847	3.9775	4.8149	4.3473	5.0845	1.4994	1.8011	1.7596	1.8175	2.1513	2.3751	1.8617	1.8589	2.3607	1.0221	1.7234	1.9407	4.7699	2.3883	2.608	2.5786
ENSG00000074966	TXK	chr4:48068409-48136273	protein_coding	3472	0	0.0724	0.0246	0.0185	0	0.018	0	0.0195	0	0	0.0141	0.0098	0.0211	0	0.0096	0	0.2028	0.094	0.0253	0.0529
ENSG00000075035	WSCD2	chr12:108523247-108644314	protein_coding	6557	0.4937	0.5371	0.5872	0.5923	0.0334	0.0286	0.0205	0.0155	0.1422	0.1122	0.2757	0.2344	1.5745	0.045	0.0204	0.0465	0.0165	0	0.0045	0
ENSG00000075043	KCNQ2	chr20:62037541-62103993	protein_coding	4029	5.4922	6.4806	6.9802	6.4691	6.022	6.2707	6.4807	4.9407	1.6204	2.4346	1.6978	1.6618	3.1258	0.2488	0.1163	0.1296	0	0.0116	0.0073	0.0195
ENSG00000075073	TACR2	chr10:71163658-71176623	protein_coding	2871	0.0168	0	0.0199	0	0	0	0	0	0	0	0	0.0119	0	0	0	0.0152	0.0189	0	0	0
ENSG00000075089	ACTR6	chr12:100592899-100635643	protein_coding	3813	4.9544	3.7603	9.4776	9.0495	3.8524	3.805	8.3836	8.6597	4.1093	3.9446	8.2393	6.8895	2.8996	2.9386	6.0135	7.2461	1.7047	3.2522	6.0745	5.8159
ENSG00000075131	TIPIN	chr15:66628543-66679084	protein_coding	2755	6.4888	4.1635	9.0382	7.0139	4.4299	5.0619	7.1959	8.3664	3.7916	3.1747	4.3805	4.6126	2.2856	2.3546	3.4628	3.0797	0.6685	1.3199	2.1072	2.3529
ENSG00000075142	SRI	chr7:87834432-87856308	protein_coding	4237	11.0154	9.4634	14.682	13.0076	8.9518	9.1804	12.5216	12.7625	10.72	10.8424	11.8199	13.4644	6.0311	5.4004	3.7922	5.4838	3.733	4.9513	11.7567	11.4775
ENSG00000075151	EIF4G3	chr1:21132962-21503377	protein_coding	8353	19.6025	18.2193	15.7756	17.2194	13.2373	12.5402	11.6642	11.2683	19.5957	21.1867	14.9567	12.911	16.9968	14.9321	10.5996	11.7464	10.7841	16.5649	16.8306	16.4068
ENSG00000075188	NUP37	chr12:102467966-102513902	protein_coding	2406	13.0728	9.7858	21.1607	19.0777	12.6054	13.4638	23.5468	22.3626	6.3185	4.9942	8.2244	8.4337	3.7736	4.0443	6.1355	5.9317	2.6115	2.2477	6.6047	6.7519
ENSG00000075213	SEMA3A	chr7:83585092-84122040	protein_coding	9371	4.9135	4.0211	5.9048	5.5558	8.2041	7.948	9.11	8.7206	6.2304	6.6469	7.972	10.2399	5.6726	1.2712	2.1468	4.2903	1.2832	4.353	8.2911	7.5195
ENSG00000075218	GTSE1	chr22:46692637-46726707	protein_coding	4242	10.5468	8.1002	7.9543	7.4155	6.8567	8.4473	7.1748	6.3658	9.3442	5.858	5.6553	4.5499	2.5373	0.7785	0.5524	1.0052	0.0638	0.1539	1.0644	1.095
ENSG00000075223	SEMA3C	chr7:80371853-80551675	protein_coding	6268	0.5242	0.2889	1.3242	0.5479	1.061	1.1075	0.9	0.7387	7.1274	10.6155	18.9108	12.9111	26.2369	22.6935	31.2256	32.3487	38.0844	25.8832	43.787	40.6052
ENSG00000075234	TTC38	chr22:46663857-46689905	protein_coding	3578	3.997	5.7368	6.5288	6.5937	3.7786	3.5655	4.6999	4.5339	5.0309	5.9856	5.6124	5.7094	3.5403	2.6701	2.9563	3.0159	2.074	3.2183	4.4659	4.5549
ENSG00000075239	ACAT1	chr11:107992242-108018503	protein_coding	5584	5.1482	5.0544	9.7408	9.6514	4.6068	4.894	8.2166	8.6065	6.5307	6.1629	9.4149	9.4273	5.1663	6.1676	8.1826	8.7038	2.7549	7.3135	9.8186	8.8592
ENSG00000075240	GRAMD4	chr22:46971908-47075688	protein_coding	4886	4.1828	3.9848	2.9013	3.5081	5.7884	5.862	5.366	4.669	5.4975	5.4038	4.4599	3.8873	3.7315	1.3397	1.932	2.2619	2.2616	2.061	1.5122	2.358
ENSG00000075275	CELSR1	chr22:46756730-46933067	protein_coding	12817	6.2651	6.4727	3.1177	4.1547	3.9286	4.0156	2.5318	2.2255	2.0812	1.8878	1.5248	1.1807	2.3879	0.3267	0.2899	0.3565	2.2821	1.3131	1.0134	0.9276
ENSG00000075290	WNT8B	chr10:102222797-102243501	protein_coding	2112	0.1373	0.1906	0.108	0.1672	0	0	0.0509	0	0	0	0	0.0485	0.2774	0	0	0	0	0	0	0
ENSG00000075292	ZNF638	chr2:71503690-71662199	protein_coding	14127	21.1051	20.5803	30.3012	30.7057	18.5043	19.8538	23.4914	24.4163	19.6211	20.3618	22.8404	19.2192	17.6378	14.3602	18.7309	20.1709	5.8358	9.1741	10.7734	10.1041
ENSG00000075303	SLC25A40	chr7:87462882-87505672	protein_coding	5081	2.8146	2.4061	4.2495	3.8094	2.9198	2.5477	3.5052	4.2903	4.4054	3.6519	5.3658	4.7332	2.2625	0.8357	1.535	1.9097	0.3731	0.7891	1.7196	1.3791
ENSG00000075336	TIMM21	chr18:71815745-71826197	protein_coding	3641	5.6131	3.9242	7.3402	7.0262	5.2588	4.9981	7.8279	8.3912	4.867	4.3105	4.8175	6.5957	2.8757	3.8711	4.275	4.0631	2.2018	3.5339	4.9281	4.195
ENSG00000075340	ADD2	chr2:70834749-70995357	protein_coding	12673	12.4171	10.1627	12.966	12.4716	5.7493	5.2702	6.3209	6.4804	0.9199	1.0514	1.6501	1.6874	1.6871	0.107	0.2641	0.3365	0.0598	0.0331	0.0046	0.0228
ENSG00000075388	FGF4	chr11:69587796-69590171	protein_coding	1220	0.6336	0.9485	0.491	0.4999	0.2396	0.4613	0.2422	0.1108	0	0.067	0	0	0.4801	0.5317	0.5488	0.7846	0	0.1529	0.0721	0.0215
ENSG00000075391	RASAL2	chr1:178062863-178448644	protein_coding	11818	5.5151	5.0999	4.3225	4.8373	2.6591	2.6352	1.9912	2.0819	3.4014	4.1016	3.0677	3.1334	7.2365	8.568	5.8858	5.4453	5.5138	4.9981	6.3387	6.4799
ENSG00000075399	VPS9D1	chr16:89773541-89787394	protein_coding	3428	0.8457	0.8365	0.7572	1.1611	0.8528	0.8027	0.7523	0.9267	2.5847	2.6707	1.9669	2.0728	2.1573	2.1332	1.4745	2.2086	2.149	2.0535	2.9251	3.2537
ENSG00000075407	ZNF37A	chr10:38383263-38414472	protein_coding	9626	4.5123	4.0086	5.1706	5.512	2.1713	2.0659	2.1739	2.2892	6.637	6.3689	6.634	6.1181	4.6172	3.5288	4.1695	4.6377	1.6825	2.3489	3.3017	3.0426
ENSG00000075413	MARK3	chr14:103851728-103970168	protein_coding	8891	8.7055	7.9105	10.5993	10.4299	8.4498	8.6936	10.4992	9.8528	10.3221	9.9753	11.0292	10.6889	8.573	7.137	9.8039	9.7143	3.7285	4.7086	8.5211	7.8192
ENSG00000075415	SLC25A3	chr12:98987368-98995946	protein_coding	4685	70.7451	56.3657	89.6951	81.2363	98.7252	99.8311	141.338	141.261	74.3742	75.3216	97.5517	96.9845	56.0445	63.7687	92.4909	92.6595	34.8471	83.9252	89.1592	85.1065
ENSG00000075420	FNDC3B	chr3:171757417-172119455	protein_coding	13299	5.395	4.3239	4.7184	4.2431	5.8469	5.6052	5.2578	4.77	8.2614	10.2278	8.7035	8.6667	9.9433	7.166	7.4454	7.067	16.7237	8.9776	16.9998	16.6435
ENSG00000075426	FOSL2	chr2:28615314-28640179	protein_coding	7157	1.1949	0.9208	1.1517	0.888	0.7556	0.5417	0.6418	1.3411	6.9067	7.9949	7.1749	8.5963	3.9286	3.2218	3.9381	3.5626	12.9646	7.8557	15.5096	15.951
ENSG00000075429	CACNG5	chr17:64831234-64881603	protein_coding	1632	0.2664	0.5241	0.1223	0.4524	0	0	0	0	0.0571	0.0501	0	0.1675	0.1346	0	0	0.0267	0	0	0	0
ENSG00000075461	CACNG4	chr17:64961025-65029514	protein_coding	3380	1.8726	1.6671	1.1392	1.1966	0.5405	0.6846	0.1987	0.1	4.3322	3.3374	2.3562	3.2847	7.9936	7.0837	3.0998	4.3254	1.1859	1.6827	2.9232	3.0514
ENSG00000075539	FRYL	chr4:48499377-48782339	protein_coding	18170	4.8927	4.1837	4.7768	5.0312	4.8104	5.3347	5.5145	5.13	7.4069	7.9493	8.1342	6.9769	6.0809	4.5666	5.7368	5.9172	2.2507	2.6453	4.3503	4.1496
ENSG00000075568	TMEM131	chr2:98372798-98612388	protein_coding	12991	5.4225	4.2792	3.0299	3.1552	5.8111	5.8488	4.0963	3.9934	13.6479	11.9489	8.4547	6.3057	5.9913	5.2204	3.6254	3.6072	5.6539	4.2381	4.1098	4.4726
ENSG00000075618	FSCN1	chr7:5632438-5646286	protein_coding	3707	48.9536	43.1978	23.4905	22.2014	88.1424	88.6676	50.6168	48.3839	51.8286	50.0553	21.3257	27.8484	40.0372	27.7763	22.5297	23.9328	14.9481	18.6378	16.103	18.6122
ENSG00000075624	ACTB	chr7:5566781-5603415	protein_coding	3256	861.716	790.548	808.204	744.25	360.87	354.359	299.112	278.034	562.95	576.816	420.196	717.933	267.336	219.337	123.564	132.297	268.655	196.687	649.201	697.592
ENSG00000075643	MOCOS	chr18:33767481-33852120	protein_coding	6281	2.5077	2.3869	2.6157	2.7341	0.5003	0.3086	0.4191	0.4412	0.0594	0.0651	0.1245	0.1414	0.2215	0.0188	0.0426	0.0139	0.4743	0.5344	1.251	1.2493
ENSG00000075651	PLD1	chr3:171318194-171528740	protein_coding	9953	0.2136	0.1617	0.1232	0.3419	0.2496	0.2199	0.3779	0.3803	22.6021	20.376	32.3847	22.3128	3.0383	0.8295	2.102	2.4962	0.468	2.4825	1.2372	1.2894
ENSG00000075673	ATP12A	chr13:25254548-25285921	protein_coding	3732	0.1942	0.337	0.3057	0.258	0.0587	0.067	0.0648	0.0543	0.025	0	0	0.0092	0.0981	0	0	0	0	0	0	0
ENSG00000075702	WDR62	chr19:36545782-36596008	protein_coding	9775	6.2525	4.4262	3.2856	3.7336	2.998	2.8405	2.204	2.3372	2.4521	2.2746	1.3496	1.9396	0.9962	0.4585	0.3253	0.3606	0.6317	0.1335	0.3089	0.3759
ENSG00000075711	DLG1	chr3:196769430-197026171	protein_coding	11001	7.8527	6.0686	9.5386	8.7183	19.8097	20.2315	25.5637	24.5895	13.3952	13.3748	16.1177	11.7627	7.1883	6.0468	9.9622	14.7489	8.1341	4.1233	13.315	12.6556
ENSG00000075785	RAB7A	chr3:128444964-128533639	protein_coding	2717	18.3337	16.8315	22.2868	23.3089	17.1875	17.5847	20.9603	20.3626	18.0217	15.3436	18.0727	22.2667	17.1935	16.93	17.9012	16.8471	20.9929	17.3644	29.9667	28.0116
ENSG00000075790	BCAP29	chr7:107220421-107269615	protein_coding	8409	2.8958	2.3453	3.8871	3.7637	2.3639	2.2905	3.2648	3.6092	2.7063	2.3913	3.0214	3.7618	1.933	1.7603	2.1217	2.3129	2.6475	2.6223	5.7704	5.368
ENSG00000075826	SEC31B	chr10:102246398-102289628	protein_coding	8360	0.8611	0.9027	0.5322	0.7641	1.4511	1.6906	1.4331	1.4432	1.5953	1.7013	1.7533	1.1891	2.0495	0.917	1.8218	1.7019	0.4212	0.7751	0.7716	0.7785
ENSG00000075856	SART3	chr12:108916356-108955176	protein_coding	7270	15.5911	14.3454	19.8873	18.3363	14.2744	13.8492	17.3481	16.0476	13.0855	12.8854	14.389	14.012	8.7421	8.1118	9.7291	9.3965	2.5258	3.0396	6.2591	5.8733
ENSG00000075884	ARHGAP15	chr2:143848930-144525921	protein_coding	7743	0.1186	0.0065	0.0368	0.0249	0	0	0	0.0044	3.0113	2.8187	4.9787	1.7338	0.6336	0.358	1.4223	3.0457	0.007	0.006	0	0
ENSG00000075886	TUBA3D	chr2:132233665-132240507	protein_coding	1598	0.0302	0.0315	0	0.0201	0.0457	0	0	0.0211	0	0	0	0.0428	0	0	0	0	0	0	0	0
ENSG00000075891	PAX2	chr10:102495359-102589698	protein_coding	6243	0.0232	0	0	0.0103	0.1522	0.1603	0.1162	0.1299	0.5976	1.0344	0.407	0.3393	0.5395	0.1417	0.1287	0.4112	0	0.0523	0.0094	0.0126
ENSG00000075914	EXOSC7	chr3:45016732-45077558	protein_coding	4442	8.8755	7.09	13.0862	13.5635	7.3377	7.5883	14.8042	14.6539	5.942	5.8887	7.2046	6.8598	3.9231	3.4385	6.1793	6.1417	3.5485	4.4395	7.0295	6.9834
ENSG00000075945	KIFAP3	chr1:169890466-170054349	protein_coding	5014	1.349	1.2743	2.2015	1.8117	4.3289	4.3903	7.8274	8.7357	5.7664	6.032	7.2987	7.3922	8.7181	7.4334	10.3479	10.9342	8.4912	6.4155	9.9407	10.0862
ENSG00000075975	MKRN2	chr3:12598512-12625212	protein_coding	2848	6.718	5.9	9.2137	9.3884	7.9804	8.5197	11.3752	11.6176	11.3308	11.6242	15.4572	13.518	10.3352	9.815	16.4079	14.7278	8.0832	6.8587	16.4818	15.269
ENSG00000076003	MCM6	chr2:136597195-136633996	protein_coding	4118	37.9433	30.3346	53.2147	49.1689	26.5667	24.0092	28.1283	29.4306	15.4463	13.7759	16.4921	26.728	5.3164	1.8617	4.2838	3.5079	1.881	1.9698	7.7748	6.4367
ENSG00000076043	REXO2	chr11:114310107-114321001	protein_coding	3699	10.8803	8.1741	10.6718	10.4305	11.0638	10.7017	12.992	12.6178	4.2612	4.1324	4.2268	3.9619	2.8702	2.519	3.5564	3.3289	8.2444	5.8479	16.4866	15.5378
ENSG00000076053	RBM7	chr11:114270751-114284925	protein_coding	7885	4.4485	3.9495	7.3323	6.664	4.1429	4.489	6.8	6.9479	2.4721	2.1563	3.1974	3.8082	2.4329	2.0343	5.2174	4.3263	1.3808	1.7323	4.3393	3.6945
ENSG00000076067	RBMS2	chr12:56915712-56984745	protein_coding	3570	3.0721	2.4802	1.7657	2.5085	6.4483	6.5689	4.432	4.3926	10.4239	10.7387	9.156	5.3394	5.3941	2.4944	3.5443	3.9123	4.2787	4.1396	4.5005	4.6019
ENSG00000076108	BAZ2A	chr12:56989379-57030600	protein_coding	10918	11.5322	10.3494	6.9282	7.7527	11.5799	11.1349	7.7134	6.8751	7.5686	6.1842	4.8063	3.4511	7.7056	4.7155	6.0062	4.9457	2.3219	3.0915	2.5995	2.6537
ENSG00000076201	PTPN23	chr3:47422500-47454931	protein_coding	5981	5.3235	5.0637	1.3114	2.4741	4.3255	3.9	1.6663	1.763	3.8361	3.2801	1.4541	1.268	3.7216	2.4551	1.8133	1.9424	2.88	1.7694	0.8334	1.0706
ENSG00000076242	MLH1	chr3:37034822-37107380	protein_coding	3748	12.0401	10.4162	19.4361	18.8497	13.805	13.6652	19.8317	17.764	13.9103	13.282	15.5651	15.9502	8.5762	7.6942	10.8871	11.702	4.5524	6.1819	10.498	9.768
ENSG00000076248	UNG	chr12:109535378-109548797	protein_coding	2567	54.2438	45.4488	73.6451	66.998	23.0886	20.2445	25.764	29.452	11.5175	12.2279	12.7906	17.1536	6.4749	4.2041	5.2943	6.7631	7.2166	4.1226	9.8226	9.5897
ENSG00000076258	FMO4	chr1:171283346-171311223	protein_coding	2517	0.5183	0.5597	0.4873	0.7397	0.2613	0.2981	0.4482	0.3894	0.5929	0.6495	0.6212	0.7872	0.5818	0.5155	0.5054	0.484	0.4089	0.5927	0.9668	1.001
ENSG00000076321	KLHL20	chr1:173684079-173755840	protein_coding	4254	2.6463	2.176	3.4396	3.1616	3.1953	3.6163	4.4329	4.6953	4.2314	4.8423	5.3982	6.0629	5.7316	6.4185	7.3967	7.0166	4.3547	4.9863	7.8088	7.5573
ENSG00000076344	RGS11	chr16:318299-325980	protein_coding	4798	0.3424	0.388	0.2853	0.3345	0.1371	0.0912	0.0728	0.155	0.0583	0.1874	0.2546	0.178	0.7325	0.1475	0.3	0.2993	0.937	0.2818	1.0694	0.9846
ENSG00000076351	SLC46A1	chr17:26721660-26734215	protein_coding	7951	0.6745	0.715	0.7784	0.7428	1.682	1.7618	2.1116	2.8649	1.5601	1.4085	1.6592	1.319	1.059	0.4228	0.8252	1.0835	0.7903	0.6801	0.6379	0.6073
ENSG00000076356	PLXNA2	chr1:208195586-208417665	protein_coding	13781	0.4803	0.2227	0.1759	0.163	2.9167	2.4867	2.8245	3.4285	20.5063	22.6169	17.61	14.4615	11.6198	13.2872	9.9904	11.0064	1.8867	1.1028	0.9893	1.1483
ENSG00000076382	SPAG5	chr17:26904587-26926297	protein_coding	5467	24.6657	21.3403	34.757	34.1652	19.3162	20.121	27.8602	23.2009	19.9942	15.7444	19.894	18.1395	5.3037	2.0495	1.6777	2.5866	0.1288	0.8698	2.8048	2.5538
ENSG00000076513	ANKRD13A	chr12:110436990-110477568	protein_coding	7350	3.1093	2.9433	4.0436	3.7732	3.2712	3.2842	3.4757	3.7843	5.8244	5.6274	7.1261	5.1869	10.9183	8.3124	19.7063	17.2387	6.3895	6.1018	16.4985	15.65
ENSG00000076554	TPD52	chr8:80870570-81143467	protein_coding	8341	3.6261	4.6986	7.6119	7.5696	1.2792	1.4695	1.5265	1.0778	0.4137	0.3234	0.6385	0.8969	0.5882	0.7848	0.5458	0.9025	0.2078	0.2906	0.2074	0.2108
ENSG00000076555	ACACB	chr12:109554399-109706031	protein_coding	14159	1.9689	1.9933	1.6619	2.0063	0.9807	0.9187	0.812	0.7232	2.1408	1.8416	1.6322	1.1822	1.1842	0.6622	0.7589	0.7437	2.3489	0.3424	0.4887	0.5153
ENSG00000076604	TRAF4	chr17:27071001-27077974	protein_coding	4594	14.1664	11.9805	15.1801	13.6387	8.2085	8.821	9.3148	9.8212	13.0337	16.0851	15.2193	18.0545	13.2447	16.0462	17.3126	17.967	6.933	13.0096	15.9169	15.2357
ENSG00000076641	PAG1	chr8:81880044-82024303	protein_coding	11023	0.2893	0.0822	0.0932	0.0786	0.9746	0.8113	0.3582	0.2453	4.992	5.9399	6.4404	4.943	3.9855	3.3277	5.0653	8.0643	1.3956	3.8952	2.3859	2.4142
ENSG00000076650	GPATCH1	chr19:33571785-33621448	protein_coding	4488	2.476	2.2419	3.47	3.6476	2.6705	2.3688	2.897	2.6432	3.4289	2.6956	3.3313	3.3719	2.6593	2.2601	4.1917	3.1993	0.8931	0.9141	1.4437	1.4268
ENSG00000076662	ICAM3	chr19:10444451-10450499	protein_coding	2950	1.2775	1.5519	1.5953	2.4264	0.3964	0.2756	0.8104	0.779	0.1897	0.3048	0.2319	0.799	0.3723	0.2799	0.4425	0.3097	0.5141	0.5057	1.2324	1.0587
ENSG00000076685	NT5C2	chr10:104845939-104953056	protein_coding	7320	6.8446	5.6082	8.5217	8.393	3.2946	2.9132	3.8459	4.4093	6.1413	6.5215	9.091	8.7082	13.2937	12.8258	22.604	27.1944	7.6588	9.1838	15.3485	13.5414
ENSG00000076706	MCAM	chr11:119179240-119192231	protein_coding	7420	2.826	2.6307	2.2872	2.7037	2.8563	3.0678	3.2148	2.9834	10.3196	12.2173	11.6354	11.9747	5.0327	5.3409	8.6121	7.1717	5.1977	5.4222	6.9702	7.088
ENSG00000076716	GPC4	chrX:132434130-132549518	protein_coding	5057	57.2194	61.551	44.3038	56.4533	3.555	3.9325	3.1553	3.101	17.0414	14.37	15.2269	13.6522	18.7648	8.7695	17.5809	16.0209	5.9447	7.4857	3.6758	3.9234
ENSG00000076770	MBNL3	chrX:131503344-131623996	protein_coding	12199	1.4258	1.2455	2.8992	1.4867	1.1382	1.015	1.308	1.2689	10.199	8.0878	7.1613	9.7562	2.833	0.8798	0.9878	1.4338	0.0266	0.428	0.5456	0.5959
ENSG00000076826	CAMSAP3	chr19:7660787-7683190	protein_coding	4845	4.4177	5.088	1.8897	2.2857	0.6184	0.6712	0.4047	0.4604	0.462	0.3374	0.4034	0.2115	1.1334	0.1461	0.456	0.3592	0.0447	0.0866	0.0061	0.0217
ENSG00000076864	RAP1GAP	chr1:21922707-21995801	protein_coding	5650	1.6761	1.5939	1.6508	1.5623	0.4139	0.4206	0.485	0.4965	0.7593	1.548	2.4732	1.2999	0.8553	0.1461	0.4917	0.5006	0.1438	0.0495	0.0259	0.0464
ENSG00000076924	XAB2	chr19:7684410-7694451	protein_coding	4673	9.6775	9.7324	7.0986	7.8031	9.5241	10.358	9.3241	9.1272	10.2188	10.3905	8.5945	8.5457	8.3672	7.3827	8.6532	7.9331	3.489	3.9706	3.7771	4.0997
ENSG00000076928	ARHGEF1	chr19:42387227-42434302	protein_coding	8630	3.068	2.5184	1.7616	2.1089	2.1763	1.8478	1.8209	2.0443	3.588	3.5804	3.2837	2.9054	2.9611	1.845	2.079	2.4705	0.9729	1.048	2.1233	2.3872
ENSG00000076944	STXBP2	chr19:7701766-7712759	protein_coding	5301	1.8775	1.8696	2.4374	2.7793	1.158	1.0263	1.7483	1.511	0.2991	0.1696	0.2212	0.2255	0.2072	0.0779	0.5557	0.2873	0.0613	0.1319	0.0442	0.0743
ENSG00000076984	MAP2K7	chr19:7968727-7979363	protein_coding	5145	4.0568	4.146	3.1876	3.0632	4.8436	4.3636	3.4564	3.6523	3.9337	3.3523	2.811	2.9679	2.889	2.2237	2.2511	2.1396	1.8003	1.5857	1.7153	1.6833
ENSG00000077009	NMRK2	chr19:3933100-3942414	protein_coding	1141	18.5469	21.1643	17.6984	18.1169	0.1281	0.1096	0.0471	0.0592	0.2452	0.5015	0.8564	4.2514	13.3478	56.8021	18.7466	16.3214	34.9877	12.3393	5.3191	4.9912
ENSG00000077044	DGKD	chr2:234263152-234380750	protein_coding	9441	3.0705	2.6697	2.9033	3.0531	4.2574	4.8619	5.1301	5.0618	5.6606	6.1127	8.5443	5.2249	6.9257	6.3714	12.8953	13.0012	2.3122	3.6146	3.8043	4.0752
ENSG00000077063	CTTNBP2	chr7:117350704-117514193	protein_coding	7035	5.0066	4.9987	4.0138	4.079	2.6698	2.729	2.4744	3.7808	0.1326	0.1627	0.0486	0.1408	1.3635	0.3185	0.0856	0.2041	0.0462	0.8018	0.2	0.1119
ENSG00000077080	ACTL6B	chr7:100240719-100254084	protein_coding	2389	0.1213	0.2316	0.2507	0.3762	0	0.0262	0.0225	0.0141	0	0.1026	0.1023	0.3432	0.7969	0.1481	0.056	0.1093	0	0	0	0.0549
ENSG00000077092	RARB	chr3:25215822-25639423	protein_coding	3697	0.2483	0.4355	1.0878	0.6685	2.1942	3.4507	6.5976	6.7374	0.227	0.4422	0.2379	0.3049	1.1091	0.8295	0.3984	0.6238	1.5531	4.6027	5.8845	6.0055
ENSG00000077097	TOP2B	chr3:25639474-25706398	protein_coding	5965	57.7674	52.5021	91.3245	85.8938	44.412	43.8435	64.5832	64.4659	62.9959	59.4328	71.5238	67.6343	42.5697	33.9205	36.9981	39.4918	12.7312	20.9456	39.012	37.1419
ENSG00000077147	TM9SF3	chr10:98277865-98347209	protein_coding	7095	22.7513	17.9823	36.43	34.3606	25.1121	22.1587	38.35	37.6742	24.1875	19.3209	28.3652	32.7934	15.5213	12.7172	27.6001	24.598	21.9874	14.1994	42.3114	39.0164
ENSG00000077150	NFKB2	chr10:104153866-104162281	protein_coding	4479	3.2037	3.3472	2.9675	2.7232	3.1164	3.2532	3.4426	3.1163	3.2484	3.3945	3.1198	2.044	3.9234	2.8308	4.4393	4.0121	2.4792	4.8712	2.9064	2.8476
ENSG00000077152	UBE2T	chr1:202300784-202311108	protein_coding	1065	27.8548	20.4071	46.9483	38.91	33.7612	32.9416	49.1853	47.7914	19.7917	18.9581	23.7644	29.9268	5.9126	3.9869	2.5773	4.3307	3.306	4.4212	10.186	9.5365
ENSG00000077157	PPP1R12B	chr1:202317826-202561834	protein_coding	18537	1.6003	1.7288	1.3248	1.5809	1.9476	2.1186	1.4955	1.5515	2.3547	3.0162	2.048	1.5885	4.5701	5.6246	3.3154	3.2345	8.6114	6.3276	3.0779	3.075
ENSG00000077232	DNAJC10	chr2:183580998-183659191	protein_coding	21586	7.7354	5.6285	9.5308	9.0916	6.3784	5.4291	7.1805	7.5434	5.6601	5.2031	6.0367	7.3177	3.7278	2.2047	4.401	4.8558	2.828	4.2806	8.739	7.9427
ENSG00000077235	GTF3C1	chr16:27470875-27561234	protein_coding	11562	19.6361	16.6088	16.9798	18.248	13.0587	13.933	13.7915	13.2913	18.3113	19.52	17.7612	18.0436	12.748	11.92	12.759	12.3737	8.3204	6.3788	9.9227	10.0645
ENSG00000077238	IL4R	chr16:27324988-27376099	protein_coding	6091	2.7921	2.0236	2.7909	2.9406	2.9515	2.7002	3.7002	3.5955	4.563	4.536	3.9145	4.7952	1.719	0.6196	1.0112	1.0715	0.7826	0.7501	3.2828	3.4641
ENSG00000077254	USP33	chr1:78161671-78225537	protein_coding	6918	11.3908	9.9193	18.8459	16.8148	12.4231	11.1097	16.1883	16.9912	13.9401	12.5248	17.5789	14.2904	9.8643	6.2655	14.4434	14.1263	3.3747	6.2941	11.5827	10.4665
ENSG00000077264	PAK3	chrX:110187512-110470589	protein_coding	10312	2.8534	2.4637	3.1836	2.9664	0.4607	0.4366	0.3803	0.4556	1.23	1.3396	0.9997	1.1595	4.1112	1.9387	1.0972	0.9916	0.457	0.443	0.5743	0.5192
ENSG00000077274	CAPN6	chrX:110488330-110513751	protein_coding	3568	4.1707	2.0445	2.662	1.9522	0.1024	0.1052	0.1054	0.0758	57.3243	102.086	55.8294	48.4264	215.742	296.93	252.011	249.81	138.362	24.8647	45.0553	43.6761
ENSG00000077279	DCX	chrX:110537006-110655603	protein_coding	10139	0.5146	0.8336	0.7483	0.7883	0.0721	0.0678	0.0318	0.0433	12.8415	19.3573	18.6156	16.0848	104.945	101.753	120.647	99.596	9.4935	40.1777	11.6421	11.9999
ENSG00000077312	SNRPA	chr19:41256541-41271294	protein_coding	2361	55.5387	49.7552	46.0032	45.4355	58.8731	56.7621	60.0857	58.7184	37.3303	35.9029	35.2217	27.4617	20.7163	10.5906	12.5899	16.7152	3.7855	5.8052	10.6796	10.6487
ENSG00000077327	SPAG6	chr10:22634398-22743153	protein_coding	4006	0.0603	0.0502	0.0712	0.0721	0.0912	0.0781	0.0536	0.0337	0.3027	0.2245	0.3781	0.9124	2.2299	3.7686	2.5987	2.3244	0.027	0.4073	0.1317	0.1834
ENSG00000077348	EXOSC5	chr19:41892278-41903384	protein_coding	1488	13.1178	10.5487	18.4974	19.7164	4.9604	4.3288	8.7737	8.4492	6.644	5.7681	7.782	9.8258	3.5429	6.0637	6.3663	7.5443	3.6766	4.5116	7.1919	7.6545
ENSG00000077380	DYNC1I2	chr2:172543918-172604930	protein_coding	4695	20.1595	16.3519	27.9514	26.8616	19.2236	19.0473	28.974	28.7074	26.9966	25.576	32.0525	31.6215	21.5528	21.1775	23.143	25.1984	16.9942	21.7955	39.2859	37.2502
ENSG00000077420	APBB1IP	chr10:26727131-26856732	protein_coding	3981	0.0243	0	0.0072	0.0161	0.0184	0.0157	0.0067	0.017	0	0	0	0	0	0	0	0	0	0.0117	0	0
ENSG00000077454	LRCH4	chr7:100169854-100183776	protein_coding	8954	2.4066	2.4329	1.1531	1.6526	1.8691	1.9067	1.497	1.5664	4.531	4.8658	2.7393	2.5752	4.2114	4.6696	3.4618	3.6786	0.9619	1.26	1.4571	1.4684
ENSG00000077458	FAM76B	chr11:95502105-95523573	protein_coding	6042	4.4141	3.6054	7.5106	6.5716	5.7211	6.324	8.8609	9.3526	5.4645	5.1275	7.1243	8.5034	3.6113	3.0258	5.8394	5.1922	0.8786	0.9799	2.9164	2.6192
ENSG00000077463	SIRT6	chr19:4174105-4182601	protein_coding	2787	3.1551	2.5994	2.4971	2.6259	1.6782	2.6702	2.0916	2.2555	2.9449	2.405	2.0336	3.1501	3.4942	2.4969	2.0658	1.7954	1.7103	1.472	1.9883	2.1941
ENSG00000077498	TYR	chr11:88910619-89028927	protein_coding	3016	0	0.05	0	0.0213	0.0485	0	0.0267	0	0	0	0	0	0	0	0.0111	0	0	0	0	0
ENSG00000077514	POLD3	chr11:74204895-74380162	protein_coding	5508	12.1401	7.7912	14.5875	11.8942	10.0439	9.0489	10.8612	11.3269	11.8869	9.9581	12.1439	12.4413	4.2273	1.97	3.3365	3.3731	0.5704	0.8633	2.5551	2.3156
ENSG00000077522	ACTN2	chr1:236849753-236927931	protein_coding	5419	0.2586	0.3714	0.4211	0.5746	0.1214	0.0462	0.1338	0.0811	4.4921	10.906	21.2424	28.254	58.7898	76.5374	178.519	158.523	56.2159	118.627	99.8011	97.0139
ENSG00000077549	CAPZB	chr1:19665266-19812066	protein_coding	3476	21.2664	23.2007	39.1733	39.4029	12.089	13.5111	26.3836	26.3393	14.4085	15.0739	24.1485	32.3525	14.345	15.0316	18.7978	18.0754	19.4789	18.0792	54.4464	52.1708
ENSG00000077585	GPR137B	chr1:236305831-236385165	protein_coding	2279	1.8444	1.2583	1.4768	1.493	0.962	1.2623	0.9312	1.3347	1.9234	1.363	1.9938	1.409	2.1205	0.5693	1.2925	1.031	1.6637	1.7388	2.5601	2.4183
ENSG00000077616	NAALAD2	chr11:89864682-89926062	protein_coding	7254	3.2037	2.2609	5.1312	4.0709	5.2791	6.276	7.5396	8.0602	0.3857	0.3606	0.2021	0.2778	0.9084	0.0081	0.0323	0.03	0.0373	0.437	0.2506	0.2171
ENSG00000077684	JADE1	chr4:129730778-129796379	protein_coding	9110	27.4934	27.8496	36.284	40.509	10.3404	8.8965	11.3083	9.7161	6.6239	5.9041	6.1141	8.2196	3.1748	3.1008	2.3884	3.4389	2.7529	3.4082	3.8234	3.9121
ENSG00000077713	SLC25A43	chrX:118533022-118588441	protein_coding	3115	1.6131	1.4051	1.5932	1.8548	3.2611	3.4129	3.484	3.8842	2.4552	3.2539	2.7449	2.8623	1.5044	0.8519	1.0746	1.299	1.1825	1.317	4.565	4.103
ENSG00000077721	UBE2A	chrX:118708500-118718381	protein_coding	3251	11.7258	8.5886	14.2744	13.8524	7.8453	6.2902	8.486	9.0547	9.9262	9.3786	10.2047	12.893	9.3468	7.4192	10.9761	10.1584	9.2638	7.8584	14.5649	14.0059
ENSG00000077782	FGFR1	chr8:38268655-38326352	protein_coding	12698	52.8314	65.7452	47.0807	51.8612	18.0486	18.6358	18.3161	18.9504	9.0196	11.2655	8.8384	8.8671	11.8786	4.5653	2.6968	4.0605	2.5595	4.134	3.692	3.7016
ENSG00000077800	FKBP6	chr7:72742166-72772634	protein_coding	2457	0	0	0	0	0	0	0	0	0	0	0.0199	0.0278	0.0596	0	0.0545	0.0177	0	0.019	0	0.0107
ENSG00000077809	GTF2I	chr7:74071993-74175026	protein_coding	10442	32.1853	34.0101	42.1937	36.5343	25.3494	27.022	27.8583	26.9286	34.4859	34.0293	30.2317	27.2711	21.45	17.423	19.59	22.4222	10.5927	12.5902	15.6817	15.7886
ENSG00000077935	SMC1B	chr22:45739943-45809500	protein_coding	4253	0.0341	0.0237	0.0201	0.0302	0.0344	0.0147	0.0253	0.0238	0	0	0.0115	0	0	0	0	0.0205	0	0	0	0
ENSG00000077942	FBLN1	chr22:45898117-45997015	protein_coding	7136	12.4782	14.8192	14.2772	15.1901	22.9196	23.197	26.7423	25.016	20.5196	23.3222	32.0981	27.636	11.9845	3.2147	3.9403	5.2925	0.5617	20.6182	13.6612	13.9936
ENSG00000077943	ITGA8	chr10:15555947-15762124	protein_coding	7528	0.0064	0	0.0227	0.0256	1.5824	1.4538	2.6656	4.4446	0.1611	0.5429	1.0644	1.6608	4.2407	0.1488	0.1645	0.1965	0.0072	0.4025	0.1831	0.2057
ENSG00000077984	CST7	chr20:24929865-24940564	protein_coding	930	0	0	0	0	0	0	0	0	0	0	0	0	0	0	0	0	0	0	0	0
ENSG00000078018	MAP2	chr2:210288781-210598842	protein_coding	11559	1.906	0.9184	1.3251	1.2552	0.0379	0.0487	0.0674	0.114	1.993	2.1922	2.198	6.0673	11.6238	1.0306	0.9933	0.6813	0.3093	1.0285	0.2587	0.2861
ENSG00000078043	PIAS2	chr18:44388352-44500123	protein_coding	9236	6.1309	5.4525	6.4049	6.4746	4.6368	5.1865	4.6449	4.3545	6.3012	6.4165	6.1524	4.8748	5.5732	4.6228	7.3935	6.8074	5.7005	4.5327	5.5299	5.5068
ENSG00000078053	AMPH	chr7:38423304-38671167	protein_coding	5636	2.5889	1.8031	2.7682	1.868	1.8024	1.6422	1.4347	1.1453	1.1087	1.7839	2.358	2.2669	1.8448	0.0942	0.2138	0.1776	0.0384	0.0827	0.1457	0.0931
ENSG00000078061	ARAF	chrX:47420515-47431307	protein_coding	3497	7.364	8.1139	7.3406	7.8755	6.0813	6.6524	6.13	5.76	7.4944	6.8489	6.441	5.9784	5.7789	5.4639	6.0305	5.4498	5.4678	4.1594	6.7073	6.5291
ENSG00000078070	MCCC1	chr3:182733005-182833863	protein_coding	4321	3.4662	4.1798	6.4029	5.5417	5.5813	5.4417	5.7505	5.8974	5.3314	4.8429	5.4049	5.2178	4.0499	4.0534	3.4861	4.3904	1.8678	2.9994	4.614	4.4094
ENSG00000078081	LAMP3	chr3:182840000-182881627	protein_coding	3816	0.0253	0.0132	0.0523	0.0505	0	0	0	0.0177	0	0.0214	0.0128	0.0269	0.1343	0.0309	0.0614	0.0342	0.0142	0.0122	0.023	0.0413
ENSG00000078098	FAP	chr2:163027193-163101661	protein_coding	7003	0	0.0072	0.0041	0.0138	0	0	0	0	0.0799	0.2801	0.607	0.2976	0.4914	0.0758	0.0621	0.0559	6.5591	4.7332	21.0966	19.4459
ENSG00000078114	NEBL	chr10:21068901-21463116	protein_coding	13718	3.7263	4.9473	6.3208	7.2279	3.9263	3.6743	3.8538	3.2151	0.272	0.3277	0.7444	0.3735	0.7099	0.0344	0.0415	0.0983	0.0237	0.6899	0.1069	0.0861
ENSG00000078124	ACER3	chr11:76571910-76737841	protein_coding	8442	3.4911	2.8128	3.855	4.1102	1.7833	1.763	1.5751	1.6134	3.5132	2.9436	3.4031	3.569	2.0382	1.5089	1.5543	1.4741	1.0844	1.6125	2.4103	2.4062
ENSG00000078140	UBE2K	chr4:39699663-39784412	protein_coding	5245	24.3463	19.2796	27.5436	30.1218	12.0106	12.8411	15.9026	16.8114	15.4347	11.9535	15.0537	17.3246	8.0549	6.8361	13.4279	12.2113	4.3065	5.413	11.6327	10.1073
ENSG00000078142	PIK3C3	chr18:39535170-39667794	protein_coding	15176	2.652	2.2774	3.9092	3.5851	2.4945	2.6414	3.3809	3.2336	4.6338	4.3952	4.8647	4.8779	4.0962	3.7499	4.6871	5.4217	2.5913	2.4176	4.4222	4.0708
ENSG00000078177	N4BP2	chr4:40058445-40159872	protein_coding	9835	18.1077	14.7986	20.611	21.6122	8.4264	8.3678	10.9964	11.2885	21.0241	17.0632	19.7524	16.7417	11.5768	7.3154	17.3309	17.0593	1.2557	2.4554	3.0467	2.9673
ENSG00000078237	C12orf5	chr12:4430370-4462338	protein_coding	1602	6.1826	3.0462	8.4036	6.9126	2.0528	2.147	2.2805	3.4598	4.0171	3.5718	3.4159	7.4847	3.3822	5.0801	11.1789	8.0123	8.2163	6.9551	17.6611	13.8755
ENSG00000078246	TULP3	chr12:2986388-3050306	protein_coding	3181	7.9588	8.2083	8.5092	8.4056	9.9708	9.3578	8.8163	8.0747	17.6212	15.3668	14.8836	14.4225	13.8338	10.7156	15.7846	12.3926	4.5465	5.4812	11.641	11.8803
ENSG00000078269	SYNJ2	chr6:158402887-158520208	protein_coding	9985	2.4484	2.0104	2.0996	2.2696	0.3513	0.3946	0.2448	0.2437	4.6049	6.6884	6.0383	3.8112	2.7279	4.1166	3.158	3.0678	3.8299	4.8697	7.4583	7.2936
ENSG00000078295	ADCY2	chr5:7396320-7830194	protein_coding	17784	2.4315	2.7865	2.3897	3.0268	0.3904	0.3938	0.577	0.7088	0.5454	0.4964	0.7418	0.5378	2.5733	1.3098	1.5623	1.0129	0.5087	0.152	0.0214	0.0354
ENSG00000078304	PPP2R5C	chr14:102228134-102394326	protein_coding	14289	6.6273	5.9608	9.4097	8.8103	8.3877	7.6502	9.8435	8.8862	7.7412	7.1508	8.716	7.2247	5.4881	4.6183	6.5547	6.489	5.8757	3.5921	7.5796	6.8195
ENSG00000078319	PMS2P1	chr7:99918614-99939531	pseudogene	1114	4.0335	3.3871	6.4521	5.8492	4.3953	3.9296	5.7391	4.035	3.1814	3.4487	4.0351	3.3118	1.5117	1.7999	3.6058	3.8277	0.9239	1.4229	3.2635	3.416
ENSG00000078328	RBFOX1	chr16:6069094-7763340	protein_coding	8213	0.2	0.1531	0.0868	0.0664	1.397	1.3249	1.3737	1.2798	0.8517	1.4232	1.404	1.5556	5.3669	6.8932	5.7345	7.4117	6.3974	7.6233	5.3619	4.9625
ENSG00000078369	GNB1	chr1:1716728-1822495	protein_coding	6351	32.3621	28.8896	45.3414	45.3604	30.574	30.4952	47.0595	43.535	36.1259	31.4047	42.2662	47.1345	24.7873	23.1026	28.8726	30.0282	17.4927	15.2316	40.8696	40.6366
ENSG00000078399	HOXA9	chr7:27202053-27210117	protein_coding	2550	0	0	0	0	14.5015	11.6734	13.3682	13.9561	7.6808	7.0202	9.1779	6.8991	11.5717	1.6651	9.6484	8.1733	1.1258	2.9069	4.0357	4.0652
ENSG00000078401	EDN1	chr6:12290595-12297427	protein_coding	2033	1.521	4.0831	1.5152	6.1418	1.0065	0.7998	0.4096	0.2826	0.1376	0.1206	0.1923	0.2184	0.2521	0.058	0.3787	0.0428	4.9025	0.7567	1.2979	1.3684
ENSG00000078403	MLLT10	chr10:21823093-22032559	protein_coding	6844	11.7187	11.5114	11.5565	13.3994	10.0694	10.1608	10.3542	9.9454	9.1577	9.5907	10.0446	8.675	6.9754	4.8167	7.2093	6.8852	1.6066	2.5408	3.2087	3.5547
ENSG00000078487	ZCWPW1	chr7:99998448-100026615	protein_coding	3318	0.7718	0.3942	0.7479	0.8126	0.5506	0.3393	0.502	0.4278	0.6746	1.2072	0.9277	1.1016	1.0372	1.0486	0.7264	1.3376	0.5387	0.7025	0.866	0.6407
ENSG00000078549	ADCYAP1R1	chr7:31092075-31151089	protein_coding	6828	2.5049	3.0135	3.2833	3.6198	0.9847	0.925	1.1685	0.8068	9.4523	12.4984	12.4009	10.2863	4.7827	2.3492	2.8238	4.5754	0.0079	0.0341	0.0043	0.0038
ENSG00000078579	FGF20	chr8:16849677-16859690	protein_coding	1688	0	0.0298	0.0169	0.057	0.0433	0.0741	0.0477	0.1001	0	0	0	0.0405	0	0	0	0.0258	0.0321	0.5524	0.0521	0.0466
ENSG00000078589	P2RY10	chrX:78200828-78217451	protein_coding	1803	0	0	0	0	0	0	0	0	0	0.0453	0	0	0	0	0	0	0	0.0259	0	0
ENSG00000078596	ITM2A	chrX:78615880-78623164	protein_coding	2051	2.921	3.5813	6.55	6.9487	8.3735	8.5679	16.4634	16.4782	45.7919	51.5323	52.8376	67.6887	29.3453	28.6095	23.6325	41.2623	0.0528	0.2728	1.5296	1.5739
ENSG00000078618	NRD1	chr1:52254862-52344477	protein_coding	6619	21.9494	17.5653	32.9437	31.4099	19.631	18.4897	31.8912	29.8345	16.782	16.1657	23.2596	22.7601	11.8697	10.7094	16.0669	17.6831	15.6797	18.1506	32.1453	29.7727
ENSG00000078668	VDAC3	chr8:42249141-42263415	protein_coding	3144	24.6185	18.738	43.2192	37.3972	23.5699	24.8236	39.4056	38.9028	27.2917	25.6355	43.0782	41.1146	17.1639	21.3458	32.3453	33.1038	18.6931	21.9011	30.0093	30.0753
ENSG00000078674	PCM1	chr8:17780348-17885478	protein_coding	12470	19.0974	16.2345	26.0499	23.7019	18.3141	18.2895	20.0706	18.7874	26.2896	23.0085	24.8724	25.3754	19.0126	19.139	18.6321	18.9013	11.0983	15.0476	16.5547	15.9042
ENSG00000078687	TNRC6C	chr17:76000248-76104916	protein_coding	11058	3.657	3.5441	2.6026	2.7808	3.2714	3.4724	2.8714	2.9127	3.6099	3.563	3.2608	3.0429	3.1518	1.7012	1.7951	1.5739	0.3674	0.5396	0.4189	0.5245
ENSG00000078699	CBFA2T2	chr20:32077880-32237842	protein_coding	9457	2.3143	2.4045	2.1866	2.2877	2.3801	2.8236	2.8007	2.7375	3.8167	5.3331	5.5591	3.6086	5.3346	2.6939	5.2351	4.6239	0.9966	1.7303	1.7144	1.74
ENSG00000078725	BRINP1	chr9:121915735-122131745	protein_coding	3905	3.155	3.53	3.4767	3.962	0.0936	0.0641	0.1032	0.1298	0.7643	0.7745	0.8383	0.5161	3.3376	0.3624	0.1372	0.2674	0.2081	0.2985	0.0075	0.0202
ENSG00000078747	ITCH	chr20:32951040-33099198	protein_coding	6664	11.332	10.2898	15.8834	16.7621	10.8459	10.2663	16.2531	16.3354	13.1418	12.7446	18.3809	15.1222	12.251	11.3981	23.5031	20.2081	8.2258	9.2973	20.4539	19.8759
ENSG00000078795	PKD2L2	chr5:137223656-137278436	protein_coding	4654	0	0	0	0	0	0.0134	0	0	0.0401	0	0.0105	0.0147	0.0157	0.0507	0.1582	0.2057	0.1397	0.0301	0.0126	0.0113
ENSG00000078804	TP53INP2	chr20:33292093-33301243	protein_coding	4228	1.177	1.0352	0.3575	0.7744	1.0198	1.2868	0.5528	0.6395	1.6324	2.4554	0.8436	1.8422	4.191	3.2639	2.8819	1.5437	7.6356	18.0171	3.0928	3.3581
ENSG00000078808	SDF4	chr1:1152287-1167411	protein_coding	4709	9.6958	9.017	7.4198	8.2206	8.8926	8.0212	8.5911	8.2608	8.4373	9.8598	6.7235	8.1757	8.3809	5.9486	5.6513	6.4218	12.8487	8.2864	13.7226	14.4456
ENSG00000078814	MYH7B	chr20:33563205-33590240	protein_coding	7929	0.0792	0.1396	0.1043	0.0931	0.0369	0.071	0.0136	0.0256	0.3411	0.4639	0.5854	1.0254	3.3244	8.4268	8.2239	4.5602	13.2667	1.4288	3.6718	3.7633
ENSG00000078898	BPIFB2	chr20:31595405-31611515	protein_coding	1898	0.0255	0	0	0	0	0.0329	0.0142	0	0	0	0	0	0	0	0	0	0	0	0	0
ENSG00000078900	TP73	chr1:3569083-3652765	protein_coding	6763	0.3858	0.5579	0.1434	0.2183	0.1621	0.1664	0.1629	0.1349	0.3586	0.3143	0.1373	0.1818	0.1299	0.0436	0.0247	0.0836	0.0961	0.0276	0.0217	0.0116
ENSG00000078902	TOLLIP	chr11:1295600-1330884	protein_coding	5983	1.9704	1.934	1.9546	1.7973	2.4307	2.3204	2.1731	2.2369	2.1512	1.8444	1.4128	2.084	2.5822	2.9964	2.8142	2.3417	3.4041	2.3999	3.3421	3.1845
ENSG00000078967	UBE2D4	chr7:43966036-43995735	protein_coding	4713	1.1174	1.1422	1.2104	1.1306	0.5737	0.4909	0.4161	0.4016	2.1966	2.2721	2.0215	2.7181	1.74	2.4025	1.456	1.6433	4.3789	3.6995	2.9301	3.213
ENSG00000079101	CLUL1	chr18:596987-650334	protein_coding	3846	0.0502	0.0785	0.0148	0.0584	0.095	0.0976	0.0768	0.1933	0.0243	0	0.0127	0.0355	0.514	0	0.0783	0.0113	0.0986	0.0606	0.8462	1.0508
ENSG00000079102	RUNX1T1	chr8:92967202-93115514	protein_coding	13527	0.8608	0.8591	0.5735	0.8732	0.081	0.1017	0.1807	0.1924	1.3652	2.0244	2.3586	2.437	2.8688	1.7308	1.9252	1.9171	0.012	0.6307	0.4075	0.39
ENSG00000079112	CDH17	chr8:95139398-95229531	protein_coding	3901	0.0248	0.0516	0.0439	0.0494	0.0562	0.016	0.0826	0.078	0	0	0	0	0.0188	0.0151	0	0	0.0417	0.4661	0.0601	0.0875
ENSG00000079134	THOC1	chr18:214519-268050	protein_coding	8099	8.7634	6.6715	11.7978	10.2054	7.8684	8.7176	9.0316	8.9259	7.8883	7.2871	9.574	8.1701	5.6143	4.3252	5.6665	6.6457	1.4981	2.4291	3.3124	3.0978
ENSG00000079150	FKBP7	chr2:179328390-179343327	protein_coding	3080	1.0196	0.8657	1.8521	1.5737	5.1726	4.9339	7.2652	7.0666	14.6259	14.4376	17.4973	13.5312	5.0398	2.9869	5.3906	7.1341	3.3063	6.4934	11.2232	11.3497
ENSG00000079156	OSBPL6	chr2:179059207-179264160	protein_coding	8028	2.8647	1.9803	3.1123	2.6109	4.4242	3.6846	4.3098	3.9994	4.2869	3.6554	4.0107	3.9063	2.8274	2.9531	2.3225	2.1409	0.9851	2.2067	2.4761	2.321
ENSG00000079215	SLC1A3	chr5:36606456-36688436	protein_coding	6265	3.1079	2.1842	3.4965	3.3303	3.8961	3.1842	3.4088	3.3662	3.0072	4.3839	5.1238	3.9423	4.2541	0.2824	0.4007	0.7987	0.147	1.6668	2.499	2.4547
ENSG00000079246	XRCC5	chr2:216972186-217071026	protein_coding	5463	150.694	109.782	223.888	194.612	109.039	105.978	153.403	144.529	99.9588	84.0316	96.538	145.61	53.1428	68.5048	67.3951	71.2918	35.1693	45.7577	94.3496	89.7424
ENSG00000079257	LXN	chr3:158363610-158390482	protein_coding	1504	4.0477	3.5123	6.4479	5.6983	5.345	5.8212	6.9122	8.0447	1.9224	1.3587	2.2091	1.2265	0.9737	0.3921	0.3784	0.3182	1.4406	16.2735	70.3739	67.4595
ENSG00000079263	SP140	chr2:231067825-231223762	protein_coding	5829	0.0497	0.0086	0.0391	0.0275	0.0251	0.0215	0.0184	0.0058	0	0.0421	0.0251	0.0293	0.0628	0.1416	0.0632	0.0299	0.2323	0.2159	0.1107	0.1396
ENSG00000079277	MKNK1	chr1:47023089-47082515	protein_coding	8060	1.4506	1.4731	1.9428	1.9275	1.9948	2.2733	2.4363	2.3398	1.7704	2.1805	2.2975	2.0725	2.0622	1.3829	1.5159	2.0136	1.1358	1.2262	1.7206	1.7746
ENSG00000079308	TNS1	chr2:218664511-218867718	protein_coding	15595	0.5236	0.4936	0.2725	0.3437	0.8201	0.794	0.5615	0.4703	4.4376	5.2363	3.7001	2.0503	3.8171	1.7206	2.5736	2.2209	7.2732	4.6126	4.3598	5.0115
ENSG00000079313	REXO1	chr19:1815247-1848452	protein_coding	5186	8.2078	7.5183	2.2275	2.4696	4.7067	4.7511	1.6731	1.9225	5.9708	5.4537	1.6676	2.3582	4.6451	3.8322	1.6137	1.5773	2.4232	2.1665	1.3003	1.4271
ENSG00000079332	SAR1A	chr10:71907044-71930279	protein_coding	6914	15.3456	13.0466	26.5011	25.3158	11.553	10.9895	18.2802	19.3473	17.4149	16.0671	22.2955	27.3079	15.1863	16.8457	27.485	26.4062	11.5635	17.066	28.17	27.47
ENSG00000079335	CDC14A	chr1:100810583-100985833	protein_coding	5729	2.8505	1.73	2.335	2.2691	2.7298	2.9363	2.7289	2.8906	2.214	1.6123	1.6886	1.759	1.8788	1.3588	1.7061	1.4962	0.7469	0.6103	1.3255	1.1773
ENSG00000079337	RAPGEF3	chr12:48128454-48164823	protein_coding	11995	0.3182	0.1929	0.1926	0.2863	0.1462	0.2242	0.2396	0.2451	0.1089	0.075	0.1589	0.1168	0.3724	0.0393	0.2344	0.1777	0.14	0.2643	0.2664	0.2516
ENSG00000079385	CEACAM1	chr19:43011455-43065386	protein_coding	5524	0.0525	0.082	0.0465	0.0581	0	0	0	0	0.0169	0	0	0.0062	0.0133	0.0107	0.0061	0	0.0098	0	0.0106	0
ENSG00000079387	SENP1	chr12:48436680-48500091	protein_coding	6366	6.1248	4.6548	6.2502	5.7733	6.6583	6.4638	6.1144	6.0628	6.9005	6.356	5.7947	6.6486	5.0838	4.7523	5.6736	5.2424	1.004	1.7136	2.9338	2.7456
ENSG00000079393	DUSP13	chr10:76854191-76868979	protein_coding	2349	0.1645	0.4712	0.3157	0.4783	0.0311	0.0532	0.0343	0.0288	1.5088	2.1923	1.4768	1.4252	3.7717	6.0002	8.9492	8.8911	16.9487	7.5218	8.9867	8.7703
ENSG00000079432	CIC	chr19:42772688-42799949	protein_coding	9494	7.0483	6.9736	2.3373	3.0496	5.1266	4.6372	2.0231	2.2284	6.5131	6.6554	2.4239	3.4578	5.2675	3.4599	1.4209	1.659	3.4632	2.0918	1.5904	1.6171
ENSG00000079435	LIPE	chr19:42905658-42931578	protein_coding	5206	0.3991	0.4155	0.3342	0.4008	0.1965	0.2643	0.1909	0.1688	1.0749	1.0834	0.4786	0.899	0.7173	0.4531	0.5401	0.4597	0.0728	0.1075	0.0901	0.1966
ENSG00000079459	FDFT1	chr8:11653081-11696818	protein_coding	5202	36.4174	37.3016	52.357	55.435	32.4803	36.8221	44.4821	38.481	29.529	31.8044	31.7463	30.1747	22.014	21.0634	21.6467	22.9014	5.8728	19.6892	19.5856	19.5593
ENSG00000079462	PAFAH1B3	chr19:42801184-42807698	protein_coding	1419	22.7104	22.6906	29.3265	28.2078	26.7808	23.049	27.1467	24.4604	25.1734	24.7128	22.8285	32.6682	12.384	6.3586	3.7508	4.8141	3.1683	6.0123	8.8433	8.7295
ENSG00000079482	OPHN1	chrX:67262185-67653755	protein_coding	8224	3.0608	2.7467	2.4728	2.658	2.8525	2.8896	2.0774	2.0835	5.3755	5.586	4.2716	3.6429	6.2857	4.8977	4.0743	4.3331	2.1274	5.2379	3.7683	3.7624
ENSG00000079557	AFM	chr4:74347399-74369691	protein_coding	2217	0	0	0	0.0145	0	0	0	0	0	0	0	0	0	0	0	0	0	0	0	0
ENSG00000079616	KIF22	chr16:29802039-29816706	protein_coding	4312	26.7906	22.2845	37.1811	35.3069	20.9649	21.9428	31.9836	28.9294	22.3649	17.6489	22.0955	24.3847	6.7073	3.3918	3.2139	4.228	0.7035	1.0163	3.7533	3.737
ENSG00000079689	SCGN	chr6:25652463-25702011	protein_coding	1447	0	0	0	0	0	0	0.0186	0	0	0	0	0.0236	0	0	0	0	0.0374	0	0	0
ENSG00000079691	LRRC16A	chr6:25279305-25620758	protein_coding	6881	7.3866	7.3698	7.8135	9.0404	1.3701	1.6632	1.8309	2.3527	2.1958	1.6631	1.6544	1.8071	2.2878	1.1827	1.367	1.4038	1.291	1.4905	1.4317	1.3883
ENSG00000079739	PGM1	chr1:64058946-64125916	protein_coding	4090	10.7616	16.3966	26.0608	20.554	23.3537	24.7852	37.1153	31.7144	15.6432	16.3085	21.479	16.7797	12.102	11.5206	16.4341	17.564	13.3099	11.1249	21.5987	21.393
ENSG00000079785	DDX1	chr2:15731301-15771235	protein_coding	3817	24.9992	18.8215	51.2388	46.4365	26.2876	23.9692	52.874	52.8511	23.2127	20.9656	34.9324	48.4534	11.759	13.7815	16.68	19.242	10.9128	13.3007	34.2736	30.9193
ENSG00000079805	DNM2	chr19:10828754-10944164	protein_coding	13443	7.2492	6.9497	6.7832	7.3089	6.877	6.9361	6.7781	6.9665	5.4601	5.3935	4.6777	5.4279	4.6243	4.2904	4.8755	4.4569	4.0213	3.7939	6.2987	6.3741
ENSG00000079819	EPB41L2	chr6:131160486-131384462	protein_coding	10247	8.8171	7.1386	10.2015	10.3246	9.1431	9.1482	12.5807	13.1961	17.9397	17.3265	23.2543	15.3719	11.49	7.8155	15.0432	18.9721	2.532	4.1538	7.3505	7.2224
ENSG00000079841	RIMS1	chr6:72596405-73112845	protein_coding	12800	0.5284	0.283	0.41	0.3686	0.4282	0.4006	0.233	0.3459	0.1093	0.115	0.1031	0.1281	0.5606	0.1106	0.1098	0.0884	0.1904	0.0583	0.0779	0.0554
ENSG00000079931	MOXD1	chr6:132617193-132722684	protein_coding	5293	0.6846	0.7794	1.0562	0.9521	0.428	0.5199	0.3908	0.4597	20.5634	24.5088	21.5819	8.2546	9.5312	5.0917	3.2823	6.0174	0.5629	2.6776	5.4395	5.4144
ENSG00000079950	STX7	chr6:132767005-132834337	protein_coding	16387	2.5975	2.3916	4.24	3.9332	3.648	3.6445	4.9899	4.692	3.136	3.3621	4.5231	2.981	3.4584	2.3536	4.3448	4.5696	1.6197	2.1337	3.4782	3.2911
ENSG00000079974	RABL2B	chr22:51205928-51222091	protein_coding	5870	1.6297	1.2513	1.1856	0.8913	1.3321	1.7685	0.8146	0.8406	2.3515	2.3812	1.1237	1.5422	1.8461	1.296	0.5303	0.8747	0.6552	1.1516	0.974	0.9836
ENSG00000079999	KEAP1	chr19:10596795-10614417	protein_coding	3761	11.1891	11.651	15.486	14.2954	9.599	9.6606	12.6707	11.4303	11.6552	12.3016	11.9518	15.8042	6.3661	8.577	9.4343	8.4801	8.9438	7.4249	10.6644	10.7669
ENSG00000080007	DDX43	chr6:74104470-74127292	protein_coding	2807	0.0172	0.0358	0.0203	0.0114	0	0	0	0	0	0.0291	0	0	0	0	0.0239	0	0	0	0	0
ENSG00000080031	PTPRH	chr19:55692615-55720874	protein_coding	4344	0.3225	0.1969	0.2298	0.2069	0.1009	0.144	0.235	0.14	0.0859	0	0.0112	0.0393	0.0843	0	0.0231	0	0.0499	0.3112	0.351	0.3021
ENSG00000080166	DCT	chr13:95089557-95131936	protein_coding	7047	0	0.0214	0.0445	0.0683	0.0415	0.0532	0.0724	0.0528	0.0397	0.0232	0.0347	0.0097	0.052	0.0335	0.1093	0.1544	0	0	0.0083	0.0112
ENSG00000080189	SLC35C2	chr20:44978166-44993043	protein_coding	4106	7.2955	6.0773	7.8774	7.3875	5.1082	4.2341	5.0572	5.877	5.0881	4.6386	4.8907	5.6657	4.5651	3.6768	4.1904	4.5779	3.3244	3.304	5.941	5.6885
ENSG00000080200	CRYBG3	chr3:97595818-97663810	protein_coding	5003	3.2545	3.0369	4.6008	4.9851	3.2282	3.2124	3.7102	4.168	7.8856	7.6792	10.4789	7.982	4.1711	4.0549	5.7072	9.358	3.3347	3.8578	5.3388	4.7421
ENSG00000080224	EPHA6	chr3:96533424-97471304	protein_coding	6303	0.023	0.0718	0.086	0.0917	0.0116	0.0198	0.0085	0.0268	0.0296	0.0259	0.1163	0.065	0.4995	0.0094	0.0266	0.0414	0	0.0222	0	0
ENSG00000080293	SCTR	chr2:120197418-120282070	protein_coding	2900	0	0.0173	0.0393	0.0443	0	0	0	0	0.0322	0.0282	0.0337	0.0353	0.1262	0.0203	0.0231	0	0	0	0	0
ENSG00000080298	RFX3	chr9:3218296-3526004	protein_coding	11037	3.0336	2.2654	4.2149	3.6062	4.251	4.9975	6.6275	6.2651	3.8027	4.2882	5.476	4.002	7.1051	3.067	8.0584	6.8241	0.9227	1.208	1.2113	1.177
ENSG00000080345	RIF1	chr2:152266396-152364527	protein_coding	18166	22.5165	19.4136	28.8569	28.1352	15.3757	15.1848	17.5127	18.8704	18.1029	15.0966	17.3372	17.1443	9.609	6.6387	10.8773	10.4167	2.7373	4.4525	7.7147	7.1208
ENSG00000080371	RAB21	chr12:72148653-72184699	protein_coding	6670	5.2371	4.8046	9.0613	8.542	5.4454	5.241	8.7032	7.9602	5.761	4.3629	6.9809	7.6158	4.4349	4.0848	9.4199	8.5913	5.5141	5.8641	10.2639	9.2424
ENSG00000080493	SLC4A4	chr4:72053002-72437804	protein_coding	8361	0.2254	0.2166	0.2354	0.2726	0.0437	0.1122	0.1028	0.1738	0.1673	0.4595	0.5435	0.6864	1.4975	2.3488	1.4613	2.4927	3.913	8.1128	4.2957	4.0209
ENSG00000080503	SMARCA2	chr9:2015341-2193624	protein_coding	7132	0.271	0.5291	0.7918	0.9541	1.0452	0.7804	0.9454	0.8103	5.9893	9.8682	10.6666	9.7424	6.1291	2.7618	4.1115	4.8807	4.762	5.0071	6.9228	6.6787
ENSG00000080511	RDH8	chr19:10123924-10132955	protein_coding	2001	0	0.0251	0.0855	0.0642	0	0	0	0	0	0	0	0	0	0	0.0167	0.0217	0	0	0	0
ENSG00000080546	SESN1	chr6:109307639-109416022	protein_coding	5121	8.4818	5.0398	8.8614	8.3177	5.1518	5.6418	7.2966	7.0088	4.4621	3.8628	4.3698	5.9703	5.0472	6.921	8.1773	7.9613	4.4954	5.2528	7.1165	7.0876
ENSG00000080561	MID2	chrX:107068984-107170423	protein_coding	3097	0.7176	0.666	0.8473	0.8395	0.4955	0.6462	0.5985	0.7857	1.1444	1.2933	0.8046	0.4964	3.7828	1.371	1.8266	1.124	0.857	0.6172	0.9846	0.7627
ENSG00000080572	PIH1D3	chrX:106449861-106487473	protein_coding	1931	0	0	0	0	0	0	0.0139	0	0	0	0	0	0	0	0	0	0	0	0	0
ENSG00000080573	COL5A3	chr19:10070236-10121147	protein_coding	6750	0.5798	0.4994	0.4183	0.5183	0.065	0.0371	0.0438	0.01	5.6789	5.6675	6.8041	13.2645	1.1932	0.4456	0.1835	0.1805	0.3531	8.2879	12.1403	12.8654
ENSG00000080603	SRCAP	chr16:30709529-30755602	protein_coding	12746	7.2173	5.9916	2.4548	3.5609	5.7623	5.7895	2.7419	2.991	6.3148	5.1113	2.2156	2.1495	4.5152	4.0854	1.6992	1.7854	2.4478	2.136	0.8695	1.0377
ENSG00000080608	KIAA0020	chr9:2720468-2844241	protein_coding	2707	28.5035	22.3948	37.8579	36.557	22.0835	20.1909	28.9963	28.603	24.9445	25.7577	26.2616	32.2931	11.4145	15.6854	18.0044	17.697	6.6833	11.5042	22.225	21.794
ENSG00000080618	CPB2	chr13:46627320-46679211	protein_coding	1767	0	0	0	0	0	0	0	0	0	0	0	0	0	0	0	0	0	0	0	0
ENSG00000080644	CHRNA3	chr15:78885393-78913637	protein_coding	4765	0.436	0.5068	0.5687	0.4379	0	0.0525	0.0902	0.0567	0.0196	0.1029	0.0615	0.2509	0.6147	0.0371	0.0281	0.0731	0	0.0098	0	0
ENSG00000080709	KCNN2	chr5:113696641-113832337	protein_coding	3995	4.4022	4.8483	4.2266	3.8968	0.2744	0.2661	0.2084	0.3046	0.6303	0.4297	0.3547	0.5045	4.5453	4.9304	5.3123	4.2041	0.1085	0.105	0.1394	0.1051
ENSG00000080802	CNOT4	chr7:135046546-135194875	protein_coding	6999	4.418	4.0325	3.1624	3.3983	4.9598	4.4854	3.6654	3.6119	5.3303	4.8936	3.7278	3.3141	5.1785	4.3478	3.5918	3.413	2.8248	3.2705	2.1448	2.2236
ENSG00000080815	PSEN1	chr14:73603125-73690399	protein_coding	9947	5.1195	4.7087	6.7786	6.2764	4.276	3.8225	4.7071	4.9029	6.3478	5.432	6.2922	6.0581	4.9834	3.7529	5.1084	4.6674	3.3163	3.487	5.2791	5.0446
ENSG00000080819	CPOX	chr3:98239975-98312567	protein_coding	3666	8.1184	5.503	9.3052	8.5631	11.7017	11.8556	20.2387	19.5995	3.867	3.5676	4.8913	5.768	2.5765	0.9974	1.671	2.4687	1.7435	1.9075	4.7266	4.1234
ENSG00000080822	CLDND1	chr3:98216755-98241910	protein_coding	5217	7.557	5.381	9.0373	9.2967	6.892	6.9045	9.7524	9.3286	6.7755	6.8158	9.1125	8.5975	6.4701	5.3694	7.5328	7.9816	2.0662	3.7085	5.9571	5.4379
ENSG00000080823	MOK	chr14:102690836-102771537	protein_coding	10996	0.1977	0.151	0.2568	0.2131	0.4453	0.5005	0.491	0.4272	0.8736	0.7359	0.6709	0.9537	0.6992	0.4559	0.3044	0.4511	0.9113	0.4367	0.8826	0.8688
ENSG00000080824	HSP90AA1	chr14:102547074-102606036	protein_coding	5248	236.447	116.254	222.354	202.628	105.638	88.3349	114.433	113.401	87.4728	69.4374	72.8141	176.044	40.5307	50.264	84.8521	66.6512	40.5013	41.7604	79.5496	64.3246
ENSG00000080839	RBL1	chr20:35624751-35724398	protein_coding	5954	5.161	3.6841	6.2899	5.1431	3.6454	3.7497	3.4154	3.525	7.0804	6.0133	5.9412	8.0095	2.521	1.2381	1.265	1.542	0.4003	0.6029	1.5265	1.459
ENSG00000080845	DLGAP4	chr20:34894257-35157040	protein_coding	8789	5.3653	4.6079	2.8266	2.9582	4.0245	3.8423	2.9342	2.7802	4.6585	4.7712	2.7184	1.8346	4.5903	2.8114	3.203	3.0397	2.4899	2.1323	1.4911	1.6692
ENSG00000080854	IGSF9B	chr11:133778458-133826880	protein_coding	8781	2.6796	2.498	0.851	1.3379	0.0832	0.1282	0.0459	0.0423	0.1062	0.1303	0.0612	0.1206	0.9006	1.0208	0.1296	0.1635	1.7334	0.2495	0.1436	0.1853
ENSG00000080910	CFHR2	chr1:196788897-196928356	protein_coding	1222	0	0	0	0	0	0	0	0	0	0	0	0	0	0	0	0	0	0	0	0
ENSG00000080947	CROCCP3	chr1:16793930-16825752	pseudogene	6813	2.1771	2.0307	1.2015	1.3757	1.9952	1.7256	0.9226	0.9376	2.5326	2.6636	1.4128	0.9276	2.1172	0.8656	0.737	1.1432	0.2544	0.7664	0.5896	0.5855
ENSG00000080986	NDC80	chr18:2571509-2616634	protein_coding	3600	10.8038	8.5665	16.9471	16.1117	12.1801	11.4997	15.2148	13.8848	13.2386	7.8791	12.052	12.8293	2.9898	1.032	0.7904	1.5229	0.0451	0.3626	2.9808	2.4713
ENSG00000081014	AP4E1	chr15:51200868-51298097	protein_coding	7359	3.1908	2.55	3.6356	3.4764	2.8501	2.7873	3.1502	3.4995	3.1938	3.1213	3.1072	3.6858	2.5571	2.6606	3.639	3.3761	3.0547	2.4137	5.024	4.7217
ENSG00000081019	RSBN1	chr1:114304453-114355098	protein_coding	6819	4.8535	4.2349	7.3032	6.7454	6.5053	6.4838	8.4421	8.0192	7.7277	7.0726	9.9238	7.3692	4.9501	3.2518	6.7645	6.3043	1.2074	1.928	3.6504	3.3676
ENSG00000081026	MAGI3	chr1:113933370-114228545	protein_coding	8180	2.9532	2.9952	2.9534	3.3511	3.5826	4.4188	4.4399	4.4332	4.9142	4.1171	4.1572	3.6207	3.9385	1.1102	1.9561	2.0851	1.0727	1.2709	2.0108	1.7806
ENSG00000081041	CXCL2	chr4:74962751-74965010	protein_coding	1500	0.0644	0.0335	0.0761	0.1284	0.1462	0.0417	0.0895	0.1127	0.0622	0.0545	0.0326	0.2505	0.1464	0	0.0446	0.087	0.1083	5.5322	1.896	1.9945
ENSG00000081051	AFP	chr4:74296854-74321891	protein_coding	3259	0.2224	0.1081	0.4376	0.2462	0	0	0	0	0.0859	0.0502	0.075	0.1153	0.5617	0.0181	0.0103	0.0267	0.1163	0	0.018	0.0322
ENSG00000081052	COL4A4	chr2:227867426-228028829	protein_coding	9895	0.1221	0.122	0.1297	0.1687	0.1994	0.177	0.2416	0.3074	0.0094	0.0496	0.0296	0.0552	0.1998	0.0358	0.044	0.0132	1.374	0.066	0.1422	0.1008
ENSG00000081059	TCF7	chr5:133450401-133487556	protein_coding	10063	0.9987	1.0399	0.8021	0.858	1.9463	1.5536	0.9583	1.1822	0.278	0.2031	0.1408	0.2105	0.3274	0.2227	0.1597	0.1384	0.0592	0.0278	0.1136	0.1408
ENSG00000081087	OSTM1	chr6:108362612-108487058	protein_coding	5325	2.9488	2.4186	4.5797	4.4787	1.9076	1.7498	2.7594	3.4273	1.9091	1.8421	2.2113	4.2597	2.2276	3.4775	4.4883	3.9957	7.8326	5.8482	10.3292	9.5612
ENSG00000081138	CDH7	chr18:63417487-63548638	protein_coding	5593	0.6047	0.3958	0.6477	0.4017	0.6141	0.4584	0.586	0.6466	9.9887	8.7398	10.6577	10.4138	2.9456	1.9085	2.3581	4.2865	0	0.0417	0.0472	0.0563
ENSG00000081148	IMPG2	chr3:100941389-101039404	protein_coding	8337	0.0058	0.0362	0.0274	0.0308	0.0526	0.06	0.0419	0.0243	0.2126	0.2059	0.0879	0.0942	0.1932	0.1627	0.1084	0.2192	0.7082	0.397	0.3904	0.2455
ENSG00000081154	PCNP	chr3:101292938-101313281	protein_coding	3102	34.0479	29.0795	81.2918	70.3642	26.7397	27.9216	65.4509	66.6674	27.0298	25.5082	51.5842	47.9595	19.0958	16.1405	43.8549	41.9821	8.5039	13.9167	42.1925	40.8803
ENSG00000081177	EXD2	chr14:69658227-69709075	protein_coding	4601	5.7335	5.1938	6.7447	6.6904	4.7174	4.5533	5.4239	5.2006	5.2096	5.0278	5.5326	4.6701	4.7106	3.4863	3.3612	4.2461	2.3781	2.371	3.5303	3.7133
ENSG00000081181	ARG2	chr14:68086514-68118437	protein_coding	2418	14.1868	11.4226	24.5944	17.7883	10.3667	12.5435	17.2086	14.8297	1.1186	0.8113	0.9093	1.7095	2.3922	1.6097	1.7443	2.1414	0.3136	0.9255	1.0307	1.1071
ENSG00000081189	MEF2C	chr5:88013974-88199922	protein_coding	9053	0.048	0.0333	0.0284	0.0248	0.2583	0.2625	0.1721	0.224	5.3675	11.8465	18.0423	29.4063	107.384	201.953	166.116	170.685	143.533	96.8233	78.2871	72.6412
ENSG00000081237	PTPRC	chr1:198607800-198726545	protein_coding	8507	0	0	0.0067	0	0	0	0	0.004	0	0.0096	0.0057	0.012	0.0172	0.0485	0	0.0205	0.5285	0.0384	0.0172	0.0586
ENSG00000081248	CACNA1S	chr1:201008641-201081694	protein_coding	6166	0.0627	0.0245	0.0555	0.0208	0.0356	0.0101	0.0218	0.011	2.9949	4.9183	4.0809	4.9474	23.4766	36.1622	24.5924	31.536	25.3528	22.0698	18.2401	18.5529
ENSG00000081277	PKP1	chr1:201252579-201302121	protein_coding	6211	0.1011	0.0243	0.0643	0.0568	0.0118	0.0403	0.0087	0	0.3454	1.1713	1.3767	1.8755	0.0589	0.0475	0.0647	0.1681	0	0.0075	0.0094	0.0042
ENSG00000081307	UBA5	chr3:132373289-132396941	protein_coding	6827	5.4847	3.9941	6.8392	5.7408	6.3479	6.6228	8.3575	8.1039	5.5602	5.3162	6.7703	5.9995	4.6225	2.7124	4.8983	5.7042	3.1419	2.6154	6.2486	5.6855
ENSG00000081320	STK17B	chr2:196998289-197041227	protein_coding	6580	1.9164	2.0797	3.069	3.6196	2.5212	3.0508	4.2703	4.4275	5.8823	5.5033	8.2496	11.1879	3.5052	4.768	3.8052	3.4518	8.4708	4.1093	27.2294	24.8639
ENSG00000081377	CDC14B	chr9:99252522-99382112	protein_coding	10457	5.9649	5.0372	6.3744	6.8359	5.8635	5.765	7.6244	7.2235	6.4306	6.8008	8.0225	6.2657	6.771	7.3371	9.376	9.6076	0.7459	2.0374	3.0197	2.8887
ENSG00000081386	ZNF510	chr9:99518146-99540411	protein_coding	5921	4.0065	3.4837	5.9637	5.9199	4.3816	4.4043	5.3036	5.3655	5.6864	5.964	7.7072	5.7117	5.6266	3.5856	6.4675	6.0846	1.4363	2.2991	3.2731	2.9254
ENSG00000081479	LRP2	chr2:169983618-170219195	protein_coding	16260	1.6432	2.1411	1.8191	2.438	0.7865	0.9654	1.4703	2.2053	0.3155	0.2111	0.1142	0.2983	1.1078	0.0653	0.0576	0.0401	0.0566	0.0688	0.0216	0.0113
ENSG00000081665	ZNF506	chr19:19896647-19932560	protein_coding	8414	0	0.006	0	0	0.5819	0.6689	0.7598	0.7792	0	0	0.0058	0.0325	0.6701	0.3504	0.2705	0.2224	0	0	0	0
ENSG00000081692	JMJD4	chr1:227918125-227923112	protein_coding	4315	2.4857	1.6789	2.8225	2.4027	2.9639	3	4.2769	4.6524	4.3877	3.8077	4.9822	5.708	4.0555	5.6581	6.2448	6.4132	3.314	3.4789	6.2172	6.4409
ENSG00000081721	DUSP12	chr1:161719547-161727028	protein_coding	1762	8.2536	6.3386	11.655	10.1834	12.6502	10.3281	16.1299	17.493	9.1043	8.768	10.9809	13.1253	7.2722	7.8318	8.492	8.6429	3.1971	3.81	8.8357	8.2068
ENSG00000081760	AACS	chr12:125549924-125627873	protein_coding	16089	2.1652	2.0888	2.3011	2.428	2.3802	2.1728	2.3625	2.2414	1.7739	1.7325	1.7644	1.3461	1.5564	1.1583	1.5375	1.6091	1.1379	1.2199	1.8114	1.747
ENSG00000081791	KIAA0141	chr5:141303372-141321612	protein_coding	6047	8.749	8.328	9.8675	10.2713	10.5506	10.8484	12.2164	11.4072	7.866	9.0029	8.8556	7.7168	7.7495	7.8897	7.6392	8.2676	3.4756	4.7259	6.6668	6.8181
ENSG00000081800	SLC13A1	chr7:122753584-122840040	protein_coding	4415	0.0219	0.0342	0.0646	0.1236	0.0166	0	0.0061	0.0383	0	0	0.0332	0.0232	0.0332	0.0267	0.0076	0	0.0123	0	0	0
ENSG00000081803	CADPS2	chr7:121958480-122526813	protein_coding	6364	2.5585	2.7589	4.0964	3.6819	0.4708	0.6584	1.0342	1.3648	2.1104	2.5175	3.6314	5.0296	5.235	10.1192	4.0028	4.6013	0.1787	0.6227	0.6726	0.6681
ENSG00000081818	PCDHB4	chr5:140501580-140505201	protein_coding	3621	0.7339	0.8336	0.386	0.5851	0.5651	0.5699	0.3932	0.4293	1.5969	1.6028	1.0255	0.6038	1.4559	0.6026	0.7211	0.9733	0.2842	0.618	0.251	0.2754
ENSG00000081842	PCDHA6	chr5:140207562-140391929	protein_coding	5374	0.3147	0.2528	0.1061	0.0956	0.5984	0.6982	0.4649	0.5094	1.7876	1.6884	1.3274	1.1251	0.8175	0.2853	0.2678	0.3886	0.0706	0.7027	0.3928	0.3711
ENSG00000081853	PCDHGA2	chr5:140718538-140892546	protein_coding	4653	0.0623	0.0324	0.0306	0.0414	0.0628	0.0672	0.052	0.0363	0.1403	0.2108	0.084	0.0073	0.1102	0.038	0.0288	0.0374	0.0582	0.0501	0.0252	0.0508
ENSG00000081870	HSPB11	chr1:54382246-54411602	protein_coding	3236	4.0611	2.9539	5.8261	4.7612	3.8166	4.5028	5.9271	5.1489	6.7442	4.8752	7.5493	8.044	2.5795	1.6402	2.1826	2.3799	1.5734	1.1957	4.5483	4.2983
ENSG00000081913	PHLPP1	chr18:60382671-60647666	protein_coding	9153	7.5959	7.9039	4.9516	5.4988	6.9304	7.4267	5.0568	5.2211	3.5358	4.5189	2.9947	2.7805	3.4318	3.3375	1.5543	1.6686	0.3847	0.7487	0.9385	0.8946
ENSG00000081923	ATP8B1	chr18:55313657-55470333	protein_coding	6652	0.3051	0.3252	0.4416	0.6177	0	0.0094	0.0081	0.0051	0	0.0123	0.1249	0.0719	0.066	0.0355	0.005	0.0065	2.3045	0.6588	4.4693	4.395
ENSG00000081985	IL12RB2	chr1:67773046-67862583	protein_coding	4233	1.0501	0.8201	0.7142	0.91	0.1036	0.1625	0.1269	0.0958	0	0	0.0115	0.0323	0	0	0	0	0	0.011	0	0.0124
ENSG00000082014	SMARCD3	chr7:150935849-150974982	protein_coding	5198	0.9202	0.9582	1.0865	1.0251	2.4323	1.8407	1.6692	1.5019	13.3135	14.735	13.1219	11.698	16.2274	23.3713	20.2724	21.3872	11.3794	9.1123	12.6854	13.1775
ENSG00000082068	WDR70	chr5:37379313-37753537	protein_coding	7039	4.9695	4.2312	6.5806	6.4936	5.1704	5.3128	7.6173	7.106	6.3732	6.6773	6.6913	7.0855	4.3897	4.7336	5.0266	5.8291	2.8934	2.934	5.1649	5.0072
ENSG00000082074	FYB	chr5:39105337-39274630	protein_coding	6100	0	0	0	0	0	0	0	0	0.0917	0.268	0.0801	0.0896	0.036	0.0193	0.011	0.0071	0.0089	0.0229	0.0721	0.043
ENSG00000082126	MPP4	chr2:202509592-202563417	protein_coding	4978	0.0582	0.0202	0.0115	0.0193	0.0881	0.0251	0.0162	0.0272	0.1499	0.0821	0.0491	0.0618	0.1912	0.0948	0.0941	0.1224	1.1534	0.2341	1.9554	1.9981
ENSG00000082146	STRADB	chr2:202252580-202345569	protein_coding	3242	9.6719	9.3263	16.8214	14.2176	10.8652	9.5483	12.9342	12.1551	7.2208	6.6059	9.2534	8.9353	5.5559	4.6931	3.7274	6.5763	11.4783	15.3865	29.4097	29.5548
ENSG00000082153	BZW1	chr2:201675316-201688569	protein_coding	4593	67.7546	36.1355	87.3311	65.0496	34.5912	32.2961	38.6595	39.3964	52.1057	45.4183	48.7635	94.3605	27.7865	38.0184	32.3661	29.8315	28.6342	26.8268	74.629	70.5666
ENSG00000082175	PGR	chr11:100900354-101001255	protein_coding	15305	0.0379	0.023	0.0205	0.0189	0.0095	0.0286	0.0246	0.0375	0	0	0.0064	0	0.0096	0.0154	0.0066	0	0.0035	0	0	0
ENSG00000082196	C1QTNF3	chr5:34019552-34043937	protein_coding	3576	0.608	0.2814	0.3589	0.4937	1.0831	1.2067	0.8564	0.7088	13.2493	23.3386	30.824	51.4991	2.109	1.1709	1.0484	3.5164	1.6662	0.365	3.2468	2.8475
ENSG00000082212	ME2	chr18:48405418-48474691	protein_coding	3427	23.8544	19.3192	30.8529	32.239	17.7211	17.7554	25.2794	24.5265	16.0569	13.2381	16.2959	17.5638	8.6959	7.0038	9.3965	10.0557	3.9357	6.2849	11.8492	11.9541
ENSG00000082213	C5orf22	chr5:31532372-31555165	protein_coding	4172	7.0527	5.3541	9.2021	7.4784	5.5178	4.9915	6.0203	6.6184	5.5665	4.7415	5.6448	5.9446	5.3002	5.2442	7.7346	5.903	3.895	4.4139	6.627	6.3849
ENSG00000082258	CCNT2	chr2:135675804-135716912	protein_coding	9081	8.1456	6.9029	11.4611	10.7879	8.78	9.7926	12.5868	12.0397	10.7738	10.6937	14.7476	10.3675	8.7565	7.2344	11.663	11.8301	2.7916	4.5331	6.5896	6.5487
ENSG00000082269	FAM135A	chr6:71122643-71270877	protein_coding	10589	7.2502	5.4067	9.0666	8.3785	4.8311	4.2994	5.921	6.1951	3.3118	3.8521	3.7052	4.2229	3.2223	2.69	3.1201	2.9298	0.6855	1.3692	1.3373	1.2243
ENSG00000082293	COL19A1	chr6:70576462-70919679	protein_coding	8333	0.0116	0	0	0	0	0.0225	0.0129	0.0243	11.2708	13.7234	14.717	6.1451	62.4654	28.9026	126.223	145.984	4.1082	12.9235	4.0005	3.8013
ENSG00000082397	EPB41L3	chr18:5392382-5630699	protein_coding	10975	1.3075	2.0307	2.209	2.6936	4.9675	4.5129	4.5918	4.5021	4.351	5.9361	6.9805	7.2959	8.4062	9.2315	7.8294	10.1572	0.0395	10.2287	1.9555	1.8723
ENSG00000082438	COBLL1	chr2:165510133-165700189	protein_coding	17176	0.7426	0.7323	0.626	0.6933	0.1276	0.1165	0.086	0.063	0.391	0.4283	0.4039	0.4018	1.0572	0.3571	0.7152	0.9272	2.0814	3.1756	0.9371	1.0482
ENSG00000082458	DLG3	chrX:69664710-69725337	protein_coding	7841	10.9804	11.5299	15.2852	15.9571	8.6213	8.3424	10.6581	10.2067	5.9711	4.7851	5.7826	4.971	3.782	1.0078	2.0449	2.5415	0.3523	1.1832	2.1762	2.4768
ENSG00000082482	KCNK2	chr1:215179117-215410436	protein_coding	3910	0.0494	0.0257	0.1678	0.0493	0	0.016	0.0069	0.0173	0.811	0.669	1.3371	1.5027	1.161	0.5581	0.3339	0.2671	0.4156	3.6604	5.7664	5.8931
ENSG00000082497	SERTAD4	chr1:210406143-210419976	protein_coding	5467	0.9721	0.8742	1.0121	0.9159	0.0802	0.0343	0.1376	0.2102	8.6664	8.1339	11.4038	13.8968	4.9421	0.3668	0.3184	0.6049	1.0106	3.1978	11.3265	10.873
ENSG00000082512	TRAF5	chr1:211499956-211548288	protein_coding	9022	4.8572	4.1376	6.0194	5.4719	4.7468	5.3997	5.9966	5.6453	2.7912	4.2674	5.6051	3.8545	9.5279	7.8177	14.3067	14.4587	1.2788	4.7591	5.8853	5.5909
ENSG00000082515	MRPL22	chr5:154320629-154348971	protein_coding	5267	3.2198	2.3879	4.4785	4.3026	3.0248	2.3984	4.5341	4.2671	2.6916	2.3124	3.4509	3.6969	2.1131	1.993	2.7837	2.6353	0.8536	1.248	2.7388	2.7206
ENSG00000082516	GEMIN5	chr5:154266975-154317769	protein_coding	5637	14.0822	10.6473	18.7519	15.8585	14.961	14.5552	19.3429	19.1497	12.4752	12.1664	13.5908	14.2352	7.3389	8.7983	8.6995	7.8269	3.8244	6.8147	7.599	7.3187
ENSG00000082556	OPRK1	chr8:54138283-54164257	protein_coding	5730	0.2024	0.1844	0.3982	0.1288	0	0.0109	0	0	0.1465	0.271	0.1279	0.2265	1.7634	0.4323	0.9756	0.6379	0	0	0.0051	0
ENSG00000082641	NFE2L1	chr17:46125690-46138849	protein_coding	5825	29.5281	30.7383	43.2367	42.0504	23.4611	18.6482	23.487	19.9183	18.6213	20.7408	23.7712	24.0035	24.8007	20.5722	39.1918	32.6127	95.0918	53.9107	80.7197	82.1559
ENSG00000082684	SEMA5B	chr3:122628040-122747452	protein_coding	6223	6.1723	5.1498	4.1526	3.7705	0.411	0.5326	0.5007	0.2987	0.3447	0.5517	0.6124	0.9058	2.7533	0.0663	0.0699	0.0979	0.0087	0.03	0.0141	0.0211
ENSG00000082701	GSK3B	chr3:119540169-119813264	protein_coding	8006	10.736	9.118	8.5931	9.2214	12.6152	12.8103	10.7102	11.1319	17.1365	16.7957	13.1211	13.1548	12.3741	9.7306	9.3699	9.5163	9.8983	8.8627	9.3715	9.8439
ENSG00000082781	ITGB5	chr3:124480794-124620265	protein_coding	6447	14.7635	13.4767	16.1747	19.6514	8.1616	7.4011	11.9876	11.3442	2.4304	2.764	5.1913	4.0164	3.657	0.5671	2.1651	2.5984	23.8277	2.7985	35.9544	36.8604
ENSG00000082805	ERC1	chr12:1099674-1605099	protein_coding	13484	5.5359	5.9249	5.3644	6.394	5.8588	6.261	6.1021	6.1758	6.0453	7.3352	6.2433	5.9814	4.936	4.7584	4.178	4.2014	2.8963	3.1151	4.0269	3.6843
ENSG00000082898	XPO1	chr2:61704983-61765761	protein_coding	11708	51.5008	44.1517	77.9642	74.8947	38.2132	36.5026	53.4869	49.858	37.1377	35.3626	44.2271	44.8893	19.6372	13.8366	20.1307	23.2718	5.3019	9.5565	18.4159	17.0604
ENSG00000082929	C4orf6	chr4:5526295-5529528	protein_coding	1164	0	0	0	0	0	0	0	0	0	0	0	0.0293	0	0	0	0	0	0.0401	0.0504	0.1127
ENSG00000082996	RNF13	chr3:149530494-149679926	protein_coding	3635	5.8749	4.5396	8.8431	8.7774	5.2674	4.8515	7.0353	6.5362	4.5671	4.565	6.4653	7.9317	4.1294	3.991	4.586	4.5007	4.9622	3.9117	5.7671	5.6531
ENSG00000083067	TRPM3	chr9:73143978-74061820	protein_coding	19912	0.5969	0.571	0.7234	0.7464	0.0954	0.1068	0.1093	0.0832	0.6417	0.4844	0.7361	0.35	0.8053	0.08	0.1076	0.0896	0	0.0023	0.0059	0.0026
ENSG00000083093	PALB2	chr16:23614487-23652631	protein_coding	4740	7.6448	7.3766	10.6027	10.7808	6.568	5.7391	7.2087	7.2798	6.2571	5.0184	5.3498	6.0322	3.8927	3.3343	3.8347	4.4245	1.2342	1.9867	3.1113	3.3109
ENSG00000083097	DOPEY1	chr6:83777384-83881069	protein_coding	10613	3.6374	3.7212	4.5956	4.7151	2.9334	2.793	3.3563	3.124	5.9934	5.8382	6.9792	4.7863	8.6998	6.7291	9.4621	8.9252	3.5676	3.9227	5.0417	4.9728
ENSG00000083099	LYRM2	chr6:90277862-90348472	protein_coding	8679	2.0263	1.9361	3.3817	3.3877	3.5534	3.4658	4.5189	5.0701	5.04	4.5303	5.7478	7.1085	3.7458	4.9603	4.4663	4.8379	3.027	3.6634	5.226	4.8865
ENSG00000083123	BCKDHB	chr6:80816363-81055987	protein_coding	4102	6.5252	6.0342	9.0324	8.3885	5.6654	6.5707	9.5349	9.2278	6.1389	6.0779	5.7173	6.2542	4.4803	4.9887	5.8265	4.3278	4.6614	3.9551	6.3899	6.1355
ENSG00000083168	KAT6A	chr8:41786996-41909508	protein_coding	11852	8.0552	6.8214	6.1102	6.489	10.2481	9.3604	7.6359	7.6821	14.5188	12.911	11.3244	10.5088	11.3117	10.1605	9.6338	8.8843	2.3674	3.6581	3.8541	3.8285
ENSG00000083223	ZCCHC6	chr9:88902647-88969369	protein_coding	6707	5.3307	4.6881	5.8516	6.0254	4.3367	4.1026	5.0385	5.2104	6.8695	6.6179	7.212	5.9592	6.2773	5.091	8.0104	7.4281	3.5939	3.7326	7.0074	6.2333
ENSG00000083290	ULK2	chr17:19674141-19771249	protein_coding	9843	2.307	2.0496	2.634	2.5273	3.3262	3.4753	4.0282	4.1478	5.4957	5.6388	6.9544	4.8519	4.8724	2.1928	4.3088	4.7034	1.1997	2.0129	2.9251	2.8369
ENSG00000083307	GRHL2	chr8:102504659-102681954	protein_coding	6060	4.1139	5.8445	5.9869	6.2873	0.0482	0.0929	0.0576	0.0669	0.0154	0.0135	0.0323	0.0676	0.1571	0.0195	0.011	0	0	0	0	0
ENSG00000083312	TNPO1	chr5:72112138-72212560	protein_coding	11977	33.5829	24.9467	45.7569	41.5643	31.845	30.5293	51.6419	58.132	55.7091	49.904	64.5161	60.2099	27.9016	28.1447	45.5421	42.3485	20.0802	23.5959	39.3705	38.6768
ENSG00000083444	PLOD1	chr1:11994261-12035595	protein_coding	5320	9.1181	10.7333	11.2482	13.31	11.7039	13.8121	18.5818	18.0292	25.9638	32.5279	38.7109	33.082	19.241	8.2473	7.2548	10.6815	30.1277	13.6704	64.9487	67.2822
ENSG00000083454	P2RX5	chr17:3575492-3599698	protein_coding	4190	0.4958	0.2642	0.3608	0.2528	0.2093	0.1791	0.2885	0.2823	0.0223	0.1366	0.1166	0.3343	0.3495	1.3793	0.2956	0.3012	2.495	2.8261	1.4205	1.0836
ENSG00000083457	ITGAE	chr17:3617921-3704537	protein_coding	6657	1.2338	0.8918	2.0952	1.7599	0.8673	0.9676	1.7231	1.6703	1.1909	1.3261	1.9083	1.8114	0.8579	0.9833	1.8454	1.7648	1.009	0.8754	2.3122	2.1249
ENSG00000083520	DIS3	chr13:73329539-73356234	protein_coding	7602	11.1159	8.0143	14.6702	13.6889	11.1419	10.76	15.1063	15.5913	9.8763	9.1721	12.0831	11.8722	8.3026	8.9289	15.3103	12.5863	4.9664	7.6718	14.702	13.5949
ENSG00000083535	PIBF1	chr13:73356196-73590591	protein_coding	3669	6.334	4.6621	8.2714	8.3549	9.9592	9.6983	12.7761	12.7855	11.9475	10.3821	13.157	11.3776	9.619	7.3455	14.0684	13.887	4.119	6.8487	10.1407	9.2058
ENSG00000083544	TDRD3	chr13:60970590-61148012	protein_coding	4112	5.6869	4.6737	7.0959	7.0801	7.1268	7.4368	10.6288	10.7834	7.621	6.7787	10.3256	7.6762	7.5678	5.6076	9.4756	9.2165	2.9639	3.9228	4.8129	4.1932
ENSG00000083622	AC000111.6	chr7:117244844-117287469	antisense	376	0	0	0	0	0	0	0	0	0	0	0	0	0	0	0	0	0	0	0	0
ENSG00000083635	NUFIP1	chr13:45513383-45563618	protein_coding	3492	6.3645	4.8552	8.4702	7.611	6.2575	5.8202	8.185	8.4589	5.5554	4.9626	5.4008	6.5543	3.0194	3.8167	4.86	4.3486	1.5201	2.2162	3.7363	3.2993
ENSG00000083642	PDS5B	chr13:33160563-33352157	protein_coding	13212	5.6389	4.6151	5.9022	6.0033	4.9617	5.1972	5.0769	5.2593	10.6735	11.5325	13.4611	11.8678	9.6153	5.8741	9.5466	11.6747	2.5952	3.7297	5.0286	4.4991
ENSG00000083720	OXCT1	chr5:41730166-41870621	protein_coding	4194	11.8887	9.0086	18.3825	17.5111	5.9245	4.9653	6.5524	7.3573	6.5825	7.2894	6.454	9.8964	3.2647	3.206	3.1846	3.2991	7.6717	3.4348	20.6926	18.5284
ENSG00000083750	RRAGB	chrX:55744171-55785207	protein_coding	2725	1.9681	1.9385	3.1506	3.4631	3.3255	3.4653	3.9333	4.1424	4.9286	3.7496	4.3749	5.892	5.1053	3.744	5.3313	4.4549	3.1407	3.9862	6.3373	6.0385
ENSG00000083782	EPYC	chr12:91357455-91398803	protein_coding	1805	0	0.0279	0	0	0	0	0	0	0.0517	0.0453	0.0812	0.0379	2.6367	0.0327	0	0	0	0	0.0162	0
ENSG00000083799	CYLD	chr16:50775960-50835846	protein_coding	12963	1.3082	1.5369	2.5832	2.4514	0.5017	0.5114	0.6963	0.6205	2.288	1.98	3.1887	3.1465	3.5472	3.503	7.2433	5.9075	8.2067	4.891	9.9947	9.6246
ENSG00000083807	SLC27A5	chr19:58990878-59023780	protein_coding	8025	0.5419	0.5956	0.9348	1.0999	0.7741	0.8806	1.4293	1.4235	0.7554	0.7334	1.0655	1.1366	0.4927	0.2499	0.3754	0.4446	0.1822	0.2149	0.3946	0.3565
ENSG00000083812	ZNF324	chr19:58978422-58984945	protein_coding	3795	1.0949	1.1931	1.4506	1.4717	3.3892	3.0815	2.9376	3.019	3.9076	4.351	3.3989	3.1775	3.7044	2.8127	3.4665	3.4855	1.3702	1.1425	1.8851	1.9432
ENSG00000083814	ZNF671	chr19:58231118-58238992	protein_coding	3532	1.9424	2.0369	3.5855	3.5352	1.3656	1.8591	2.5935	2.574	0.845	0.972	1.245	0.9091	0.9951	1.2189	0.7108	0.85	0.8128	0.8315	1.1538	1.1963
ENSG00000083817	ZNF416	chr19:58082933-58090295	protein_coding	2561	2.8676	2.1412	3.33	3.2211	2.4826	1.7826	2.9475	2.9825	2.6585	2.8088	3.7584	2.9345	3.1736	2.6021	3.7382	3.5509	1.3536	1.6747	2.9651	2.5209
ENSG00000083828	ZNF586	chr19:58281022-58331307	protein_coding	3261	4.8152	4.258	6.5162	5.9846	5.9836	5.5805	6.8949	6.6536	4.3759	4.7376	6.143	5.1644	4.2437	4.069	3.8904	4.2297	1.196	1.5297	2.6343	2.4948
ENSG00000083838	ZNF446	chr19:58985383-58992597	protein_coding	4923	0.9127	1.1241	1.0197	0.9585	3.2807	3.2646	3.4595	3.1579	2.7281	2.4242	2.0346	2.3454	3.0936	1.8568	2.0466	1.8119	1.0893	0.7197	1.3579	1.5406
ENSG00000083842	ZNF8	chr19:58790316-58807254	protein_coding	2211	0	0	0	0	0	0	0	0	0	0	0	0	0	0	0	0	0	0	0	0
ENSG00000083844	ZNF264	chr19:57702867-57724724	protein_coding	3042	5.686	5.4742	5.7476	5.7929	7.6876	7.9969	7.3206	7.3993	7.8182	8.2495	7.9184	5.4464	8.8096	6.475	10.0796	9.2257	2.7422	3.862	3.3733	4.1756
ENSG00000083845	RPS5	chr19:58897766-58906173	protein_coding	3617	85.5297	86.9459	148.897	150.447	106.499	108.941	198.845	197.585	120.212	121.834	194.397	214.277	82.7146	127.288	150.609	161.365	37.5439	66.7393	115.348	115.533
ENSG00000083857	FAT1	chr4:187508936-187647876	protein_coding	16168	66.2478	55.0701	60.4515	61.6757	21.3303	21.6873	19.5606	18.9323	105.761	104.756	100.166	78.4316	67.0749	66.2168	90.1403	91.4141	76.1679	36.9197	62.5481	61.3473
ENSG00000083896	YTHDC1	chr4:69176104-69215807	protein_coding	7032	14.9026	13.8937	22.2234	20.9928	10.8706	10.734	15.6814	14.4136	13.5947	12.7403	17.2383	16.8958	13.3696	10.7262	19.9596	16.2919	5.2842	6.3247	10.0232	9.1175
ENSG00000083937	CHMP2B	chr3:87276420-87304698	protein_coding	3106	14.0932	11.1276	22.8015	23.0146	9.0586	8.4966	13.4746	13.9713	7.7772	6.8689	10.0047	12.6811	8.4866	9.9491	13.3421	13.3083	6.8886	5.1333	15.5658	14.4823
ENSG00000084070	SMAP2	chr1:40810521-40888998	protein_coding	3436	1.6311	1.4056	1.4112	1.2611	4.8281	4.8413	4.1123	3.8656	6.8131	6.8991	5.5457	6.7009	4.4964	4.7714	3.2928	2.8112	2.8376	3.2563	5.9901	5.8736
ENSG00000084072	PPIE	chr1:40157853-40229586	protein_coding	8071	2.4783	2.2876	4.8415	4.844	3.5404	3.6727	6.823	6.5491	3.12	2.4307	4.4616	3.4876	2.2771	1.8778	3.4133	3.3694	1.2751	1.4383	3.6472	3.4565
ENSG00000084073	ZMPSTE24	chr1:40723778-40759856	protein_coding	3572	11.8894	7.8027	18.8446	15.3843	6.0969	4.9546	6.5051	7.5693	8.6425	7.6433	6.9623	17.0613	5.0016	7.3799	4.8543	4.7506	8.8256	7.9483	16.8347	15.3041
ENSG00000084090	STARD7	chr2:96850596-96874563	protein_coding	4414	58.7354	49.1011	70.3305	63.5498	44.0405	37.5303	43.0328	46.2236	30.7648	29.1857	26.4885	34.4317	27.6857	35.3784	31.9269	32.0172	30.4826	31.4423	36.5859	35.1564
ENSG00000084092	NOA1	chr4:57829535-57844989	protein_coding	3415	6.8617	8.2351	9.0788	10.452	16.4779	15.9316	18.7843	20.6145	7.3739	7.6835	10.5874	6.0319	4.6741	4.0409	5.6362	5.9756	2.3792	3.836	5.074	4.6955
ENSG00000084093	REST	chr4:57774074-57802010	protein_coding	7875	23.7556	22.4683	29.2795	30.1665	14.4213	15.1913	15.3297	15.407	24.1131	25.7216	24.0108	22.4832	19.8602	21.2901	23.5486	23.775	10.5376	11.6623	16.5863	15.2965
ENSG00000084110	HAL	chr12:96366439-96390143	protein_coding	5146	0.0188	0.0196	0.0554	0.0499	0.0852	0.1215	0.0679	0.0591	0.1087	0.0477	0.0949	0.0929	0.0142	0.0458	0.026	0.0676	0	0.0181	0.0057	0.0204
ENSG00000084112	SSH1	chr12:109176465-109251366	protein_coding	10039	3.5807	2.7964	2.4661	2.5739	3.385	2.797	2.6946	2.8885	5.184	4.2667	3.4555	3.4777	2.9029	3.3484	2.8676	2.4228	4.4406	3.3947	6.2558	5.9813
ENSG00000084207	GSTP1	chr11:67351065-67354131	protein_coding	1925	190.7	184.276	297.063	297.524	110.551	117.796	158.358	148.319	110.175	95.2033	98.5815	156.022	50.0942	44.176	41.1077	42.3583	59.0629	40.5651	129.888	125.807
ENSG00000084234	APLP2	chr11:129939731-130014699	protein_coding	7444	52.9167	48.1601	66.0454	66.2883	36.8349	33.5784	43.5997	41.9236	16.4507	15.1098	18.8965	21.6281	14.6756	5.5614	8.7822	8.3234	11.1186	10.5902	20.4376	19.066
ENSG00000084444	KIAA1467	chr12:13197217-13295455	protein_coding	6807	6.0687	5.4027	5.8327	6.3659	5.3788	5.6225	5.9906	5.4267	1.0413	1.2129	1.371	1.0689	3.1087	1.5075	1.8392	2.8509	2.4111	5.3215	3.8636	3.6627
ENSG00000084453	SLCO1A2	chr12:21417533-21572528	protein_coding	11637	1.1708	1.3272	1.2549	2.0577	0.9106	1.2199	1.4427	1.6031	0.1523	0.1686	0.1973	0.2084	0.2076	0.0557	0.0978	0.071	0.0372	0.008	0.0025	0.009
ENSG00000084463	WBP11	chr12:14939409-14956474	protein_coding	3418	35.2114	30.2915	30.2832	30.1358	30.3184	29.7496	25.0394	23.2068	29.3606	26.4503	21.828	25.5057	17.309	16.4427	13.1428	11.6607	8.938	8.2791	9.8303	9.8741
ENSG00000084623	EIF3I	chr1:32687528-32697205	protein_coding	1725	75.5954	70.0247	118.984	111.126	81.4691	77.835	132.803	126.919	66.9355	72.1702	93.9514	105.017	48.3892	57.3319	72.5171	72.0392	38.4977	53.7004	103.289	100.959
ENSG00000084628	NKAIN1	chr1:31652591-31712401	protein_coding	2987	15.2208	11.672	9.0141	7.9521	1.9084	2.4495	1.7717	1.6632	6.7756	5.7195	4.1875	4.6089	4.3388	0.77	0.5379	0.3933	2.1036	0.9208	0.2945	0.2109
ENSG00000084636	COL16A1	chr1:32117847-32169920	protein_coding	9365	1.9398	2.5678	1.7117	2.341	0.4682	0.5542	0.8605	0.8697	5.2385	7.908	8.9945	10.6768	11.3369	10.9571	11.345	15.2021	8.005	5.7746	15.0212	15.7183
ENSG00000084652	TXLNA	chr1:32645286-32663886	protein_coding	5103	17.6293	14.6107	20.8595	19.4428	18.5888	16.4705	19.1982	19.3522	16.8512	17.4121	15.7981	22.2919	13.5593	11.152	12.0829	11.7155	9.6806	9.3458	18.9199	19.4297
ENSG00000084674	APOB	chr2:21224300-21266945	protein_coding	14828	0.2053	0.1866	0.1616	0.1494	0.0246	0.038	0.0091	0.0228	0.0126	0.011	0.0132	0.0115	0.0395	0.0119	0	0	0	0	0	0
ENSG00000084676	NCOA1	chr2:24714782-24993571	protein_coding	8633	4.55	5.1166	5.1508	5.0306	3.0475	3.1149	2.5578	2.8657	31.1032	37.0316	29.4186	30.2908	51.0414	71.2279	73.5085	69.8253	7.3599	20.7096	13.4896	13.2876
ENSG00000084693	AGBL5	chr2:27265231-27293490	protein_coding	5283	8.5143	9.1705	10.1932	10.657	16.1433	15.8264	17.3644	16.4282	8.9683	8.3553	8.3421	7.1839	5.3637	2.8577	2.9146	3.0144	2.1634	2.2326	3.574	3.4922
ENSG00000084710	EFR3B	chr2:25264998-25378243	protein_coding	6828	3.2903	2.0115	2.31	2.0967	1.8409	1.4288	1.2983	1.2226	2.568	2.1429	1.7388	2.3664	1.4477	0.7341	0.304	0.376	0.6902	0.1912	0.6054	0.4881
ENSG00000084731	KIF3C	chr2:26149470-26205618	protein_coding	6397	7.9002	9.1857	9.0512	8.7359	4.8553	4.6142	4.5352	4.6915	4.9425	4.0379	4.6514	4.6352	4.132	1.2999	1.6065	1.7141	2.5064	2.711	2.892	2.9579
ENSG00000084733	RAB10	chr2:26256975-26360323	protein_coding	3631	29.1939	27.5724	38.805	38.7286	26.7285	27.3499	32.5668	32.4099	27.9465	27.5551	29.2537	33.7845	22.0407	28.114	22.8906	26.6986	23.078	23.2905	32.2826	32.0189
ENSG00000084734	GCKR	chr2:27719708-27746554	protein_coding	3149	0.046	0.0799	0.0725	0.1019	0	0.0397	0.0256	0.0107	0	0	0	0.0108	0.0233	0	0.0106	0.0138	0	0.0444	0.0186	0.0083
ENSG00000084754	HADHA	chr2:26413503-26467594	protein_coding	3971	30.5877	32.7245	52.6994	55.6935	39.4573	37.7958	67.5188	65.9594	37.0153	38.1437	63.3288	49.7228	34.0564	33.2808	54.6828	57.8978	25.5761	34.5039	52.6062	49.58
ENSG00000084764	MAPRE3	chr2:27193479-27250064	protein_coding	3459	0.4051	0.6109	0.9235	0.6403	0.7606	1.139	0.8776	0.6253	0.6741	0.7562	0.5791	0.7999	2.7519	2.7449	1.8871	1.8617	28.9391	10.0005	17.1643	17.2304
ENSG00000084774	CAD	chr2:27440257-27466811	protein_coding	8422	29.3722	25.0292	20.4893	24.9219	19.0468	18.3332	17.8681	16.9866	14.186	13.3649	11.069	13.8314	5.9467	3.074	5.1073	5.2232	1.8587	2.9504	3.5196	3.73
ENSG00000085063	CD59	chr11:33719806-33757991	protein_coding	4942	8.5935	8.0422	13.4821	13.3213	7.0981	7.2634	11.4365	11.1539	10.0211	10.0234	16.0261	12.2901	11.5713	13.9377	19.3312	19.4312	48.6537	25.9794	80.4647	78.291
ENSG00000085117	CD82	chr11:44585976-44641913	protein_coding	4054	0.3099	0.3599	1.0131	0.7047	0.4687	0.6325	1.8421	2.4676	4.4402	6.5733	12.0762	9.4713	2.7634	4.4368	5.7964	9.3269	7.0281	1.104	22.5427	23.033
ENSG00000085185	BCORL1	chrX:129115082-129192058	protein_coding	7996	1.4925	1.1074	0.585	0.7707	4.5881	4.8255	2.4121	2.1429	4.4557	4.815	2.2303	1.0766	1.6666	0.5974	1.4903	1.3876	0.21	0.5655	0.286	0.3315
ENSG00000085224	ATRX	chrX:76760355-77041702	protein_coding	12224	13.1341	14.9685	21.7115	22.9448	16.65	16.1763	21.5821	21.4077	22.2561	21.0976	25.4249	21.4902	15.6995	11.646	15.7539	16.1209	6.8418	12.0172	16.1371	14.5089
ENSG00000085231	TAF9	chr5:68646810-68665840	protein_coding	4050	15.3773	12.8692	25.6984	24.2205	14.9048	14.4528	23.5464	21.9971	10.0866	10.3742	13.7892	15.9417	8.6237	10.2948	11.9597	11.6674	6.6204	8.1613	18.5254	17.82
ENSG00000085265	FCN1	chr9:137801430-137809809	protein_coding	1286	0	0	0	0	0	0	0	0	0	0	0	0.0266	0	0	0	0	0	0	0	0
ENSG00000085274	MYNN	chr3:169490618-169507504	protein_coding	5730	4.3762	3.4418	6.3317	6.6214	4.5404	4.3983	6.418	6.5116	5.2086	5.2355	6.8642	6.7964	4.0891	3.3963	7.0102	6.0748	2.0702	2.4734	4.4772	4.1404
ENSG00000085276	MECOM	chr3:168801286-169381406	protein_coding	9103	0.0478	0.0608	0.0752	0.0282	1.2925	1.1267	1.508	1.3997	1.0246	0.6376	0.6602	0.3565	2.3005	0.0972	0.2831	0.2868	0.6962	0.7324	1.269	1.1446
ENSG00000085365	SCAMP1	chr5:77656338-77776562	protein_coding	6842	10.5711	9.4266	17.1418	16.3073	16.0111	16.2967	27.2672	25.1376	8.8059	7.228	11.4114	8.4079	6.9775	4.7837	10.4893	11.1989	6.0326	9.3008	13.434	13.0069
ENSG00000085377	PREP	chr6:105725439-105850959	protein_coding	3762	12.2393	10.8054	16.7784	15.7762	10.0627	10.6388	15.852	13.8349	8.0325	8.6262	9.2082	8.8353	5.6638	3.6995	2.9274	4.5685	4.5499	6.6422	8.417	7.3318
ENSG00000085382	HACE1	chr6:105175967-105307794	protein_coding	9238	3.8598	3.5344	4.9894	4.7602	3.5915	3.7841	5.5511	5.7694	3.3115	2.9731	4.3951	2.7031	2.7028	0.9129	2.83	3.3488	0.7271	1.1102	1.9011	1.963
ENSG00000085415	SEH1L	chr18:12947131-12987535	protein_coding	10481	5.6885	4.128	7.3123	6.364	4.7414	4.6599	5.5079	5.5366	5.4726	4.6171	5.0533	7.102	2.48	2.6952	2.9415	2.9683	0.9664	1.8014	3.6058	3.2276
ENSG00000085433	WDR47	chr1:109512835-109584850	protein_coding	4536	1.4592	1.3309	2.0625	1.7337	2.9161	2.716	3.1979	3.7477	4.7908	4.9557	4.8902	6.7327	4.7135	3.5623	3.985	3.3957	4.1557	5.1388	7.3427	6.9891
ENSG00000085449	WDFY1	chr2:224720432-224810104	protein_coding	5516	21.8188	22.1175	31.3716	31.1965	15.1699	16.2123	21.759	20.0415	13.0871	11.144	14.3495	12.5347	9.9689	8.0398	10.1587	10.5543	5.4402	6.9896	17.1312	16.2621
ENSG00000085465	OVGP1	chr1:111956935-111970399	protein_coding	2988	0.3234	0.5893	0.2673	0.709	1.6876	2.0511	2.3824	2.2509	0.5306	0.4104	0.605	0.4001	0.7596	0.296	1.5012	0.8155	0.2719	0.3276	0.2649	0.3074
ENSG00000085491	SLC25A24	chr1:108676657-108743471	protein_coding	6548	5.6963	4.1489	8.4635	8.6766	8.4933	7.8791	11.0191	11.866	13.0043	11.36	14.9906	17.6334	9.0911	8.8171	13.0563	17.0509	6.6426	8.686	17.9059	17.0097
ENSG00000085511	MAP3K4	chr6:161412758-161538417	protein_coding	7522	12.4995	11.5774	16.3657	15.2214	10.1236	10.8162	11.5922	11.947	8.109	8.0417	8.8599	8.5061	5.9378	4.0141	5.1711	4.9515	2.6644	2.0019	4.6813	4.6089
ENSG00000085514	PILRA	chr7:99965152-99997719	protein_coding	2003	0.3859	0.3014	0.1851	0.2564	0.3649	0.4683	0.2012	0.3543	0.3259	0.2449	0.0732	0.3411	0.4752	0.1767	0.3844	0.3476	0.0541	0.1396	0.0293	0.0262
ENSG00000085552	IGSF9	chr1:159896828-159915386	protein_coding	6620	1.9122	2.0747	1.8139	1.6146	3.3229	2.9095	1.9193	2.0319	1.9865	1.4694	0.8045	0.934	0.6858	0.1158	0.0657	0.0394	0.0409	0.0352	0.0177	0.0159
ENSG00000085563	ABCB1	chr7:87133174-87342611	protein_coding	5552	0.0087	0.0453	0.0514	0.0578	0	0	0	0.0243	0	0	0.0088	0.0123	0.0132	0.0637	0	0	0.0098	0.6046	0	0.0047
ENSG00000085644	ZNF213	chr16:3179777-3192806	protein_coding	6443	0.6374	0.7886	0.3453	0.3936	0.794	0.7474	0.4711	0.4616	0.7238	0.9642	0.4853	0.456	1.1592	0.4943	0.5507	0.5943	0.4792	0.5137	0.2776	0.4399
ENSG00000085662	AKR1B1	chr7:134127101-134144036	protein_coding	3660	19.128	17.0309	34.2426	31.9056	14.4764	13.9938	23.2957	21.0445	30.5027	30.9325	50.9285	53.3786	10.3829	13.5509	15.9596	23.1702	8.2286	17.9727	20.6196	20.9951
ENSG00000085719	CPNE3	chr8:87497058-87573726	protein_coding	6792	10.8339	7.8738	16.5121	14.4944	11.1149	12.0248	18.2922	17.3362	11.2875	10.6751	16.2217	14.9479	8.9262	5.1575	7.6539	8.2384	6.0371	6.2736	13.684	12.6699
ENSG00000085721	RRN3	chr16:15153878-15188174	protein_coding	4156	10.4512	8.0621	15.3456	13.1298	7.7195	6.9067	10.749	10.1976	8.9541	8.0641	10.3926	12.6007	10.5884	13.8493	21.1266	17.4316	9.1364	10.9258	16.3527	15.5594
ENSG00000085733	CTTN	chr11:70244509-70282690	protein_coding	6949	20.1979	18.0777	21.7705	23.5254	12.9881	13.445	15.6638	16.8765	10.8044	10.8927	12.5927	13.8433	11.5694	11.6181	10.4868	11.5337	15.9016	13.7665	31.0871	29.8771
ENSG00000085741	WNT11	chr11:75897368-75921780	protein_coding	2401	0.0402	0.1257	0.0594	0.0802	0.8218	1.3283	1.3538	2.2803	1.01	0.4085	0.9361	0.7825	2.5312	0.7369	1.8682	1.1054	1.9853	0.5631	0.6716	0.6558
ENSG00000085760	MTIF2	chr2:55463730-55496483	protein_coding	3371	13.3006	13.4317	24.5711	25.4331	16.3245	15.3975	28.5123	26.2173	11.2052	10.2329	14.0592	14.1365	7.8846	8.5721	10.5158	11.5264	4.6117	5.7669	10.9327	10.3465
ENSG00000085788	DDHD2	chr8:38082735-38133076	protein_coding	10686	2.3647	1.6431	2.5784	3.0068	8.323	8.1228	11.5435	11.6135	5.5597	4.4443	7.1282	4.9166	4.4812	2.4779	3.4176	3.8193	2.0833	1.9588	5.77	5.0641
ENSG00000085831	TTC39A	chr1:51752929-51810788	protein_coding	9362	0.7896	0.8168	0.8561	0.9257	0.0234	0.0401	0.0373	0.0253	0.0498	0.0262	0.0574	0.0365	0.1251	0.0252	0.0465	0.0372	0.0405	0.1444	0.0188	0.0056
ENSG00000085832	EPS15	chr1:51819934-51985000	protein_coding	7551	8.2285	7.7419	11.5737	12.876	8.8459	7.346	9.1464	8.5756	6.8551	7.069	9.6023	7.3063	8.5138	5.8965	8.6311	10.8216	4.5121	6.5259	11.1709	10.2425
ENSG00000085840	ORC1	chr1:52838500-52870131	protein_coding	3157	22.0379	19.362	32.2357	26.4149	20.9959	21.2152	26.7777	25.7891	9.0696	8.0008	10.6478	13.2445	2.157	0.6538	0.615	0.7305	0.1716	0.443	1.2445	1.2719
ENSG00000085871	MGST2	chr4:140586921-140661899	protein_coding	3182	0.9718	0.917	1.8644	1.7653	1.9063	1.9653	3.571	2.9208	1.0259	1.4643	1.2284	1.6426	1.3576	2.1128	1.2203	1.5178	2.4343	2.0511	4.1095	4.1403
ENSG00000085872	CHERP	chr19:16628699-16653341	protein_coding	6113	7.1923	5.8597	2.4869	3.224	6.1688	5.2685	3.1112	3.0187	5.2789	4.1587	2.7175	2.4868	3.0064	2.4986	2.5244	2.5126	1.4532	1.2583	0.8537	0.9016
ENSG00000085978	ATG16L1	chr2:234118696-234204320	protein_coding	6047	5.4571	5.7073	7.594	7.4633	3.4927	3.4128	3.9937	4.4544	2.9768	3.4606	3.0784	4.0787	3.0998	3.5986	4.5669	3.8352	3.18	3.7854	5.1443	4.9519
ENSG00000085982	USP40	chr2:234384165-234475428	protein_coding	9352	1.0694	1.049	1.4426	1.5136	3.0398	2.8152	2.7805	3.0537	4.1188	4.4315	4.5975	3.8756	3.6876	3.216	2.4697	2.9916	1.6739	2.328	3.3733	3.0476
ENSG00000085998	POMGNT1	chr1:46654353-46685977	protein_coding	6366	7.5061	7.2153	8.925	9.0961	6.0958	6.6407	7.7938	7.7564	7.0616	8.8471	10.699	8.8166	7.5682	7.4388	6.7253	8.9606	8.8746	7.0376	12.0436	12.3469
ENSG00000085999	RAD54L	chr1:46713359-46744145	protein_coding	3212	11.2665	9.9459	10.9668	10.5529	9.2147	9.618	8.5138	8.1546	7.3463	5.268	4.8981	5.0943	1.5729	0.3305	0.3231	0.3658	0.0169	0.1742	0.4108	0.5311
ENSG00000086015	MAST2	chr1:46252658-46501796	protein_coding	7877	5.8209	5.5885	4.5407	5.5012	6.1326	5.9146	6.0635	6.1312	11.0234	9.4641	11.9652	6.7957	8.7006	5.1808	7.6407	6.6341	11.6902	5.5042	8.0659	8.4492
ENSG00000086061	DNAJA1	chr9:33025208-33039905	protein_coding	2730	64.2076	41.6295	98.3138	75.1199	44.1964	39.1711	55.5754	57.6154	66.858	64.4058	60.8504	127.846	40.6601	48.5392	56.8444	55.2415	24.9405	32.9069	66.8006	62.1491
ENSG00000086062	B4GALT1	chr9:33104079-33167354	protein_coding	5065	3.415	2.3044	1.374	1.7808	6.2331	5.3585	3.336	3.036	6.942	6.6975	3.7428	3.5409	4.279	3.4813	3.0863	2.9551	9.7639	4.3168	9.1981	8.3732
ENSG00000086065	CHMP5	chr9:33264939-33281977	protein_coding	2237	13.974	12.2793	25.2456	25.2971	14.7337	14.7045	28.1477	26.4995	19.6789	15.8588	31.823	29.381	20.4572	25.7561	41.2102	38.59	20.6546	17.0473	42.2029	38.7031
ENSG00000086102	NFX1	chr9:33290508-33371155	protein_coding	7147	5.78	4.7515	6.98	6.876	4.8673	5.3725	6.3633	5.9725	6.3422	6.5879	6.9526	7.4946	5.604	6.2051	10.0323	7.5857	3.9411	3.6268	6.8673	6.9364
ENSG00000086159	AQP6	chr12:50360976-50370922	protein_coding	5129	0.0659	0.0196	0.0056	0.0313	0.0142	0.0244	0.0262	0.0461	0	0	0.0191	0.0266	0.157	0	0.0065	0.017	0	0.0091	0.0229	0.0205
ENSG00000086189	DIMT1	chr5:61683080-61699766	protein_coding	3736	6.8929	4.0802	9.6042	7.3545	8.6852	8.6707	12.511	12.5562	6.1911	5.273	7.1536	7.5618	3.0182	4.2935	5.1071	5.206	2.1458	3.2319	5.3522	4.9945
ENSG00000086200	IPO11	chr5:61699798-61924409	protein_coding	7540	9.8424	7.0593	15.6155	14.3379	7.0851	6.884	12.0669	11.8961	5.2571	4.7701	6.5189	7.2309	3.2532	2.5889	3.9423	3.7163	1.4871	2.0404	4.4368	3.7208
ENSG00000086205	FOLH1	chr11:49168186-49230222	protein_coding	3824	0	0	0	0	0	0	0	0.0088	0	0	0	0	0	0	0	0	0	0	0	0
ENSG00000086232	EIF2AK1	chr7:6061880-6098861	protein_coding	5544	16.9068	15.2725	15.7121	15.0766	14.4342	13.9308	13.0244	11.9483	15.5108	13.7417	11.5538	12.5761	10.1035	7.4354	9.8659	8.3663	6.4093	7.0047	10.0375	9.3728
ENSG00000086288	NME8	chr7:37888198-37940003	protein_coding	2439	0	0.0825	0.0234	0.0526	0.03	0	0.0771	0.097	0	0	0	0.014	0	0	0	0	0	0	0	0
ENSG00000086289	EPDR1	chr7:37723445-37991543	protein_coding	2864	2.0412	1.8971	1.9818	2.1967	1.1483	1.3975	1.4632	1.2627	2.7029	2.9968	2.6613	3.0893	2.1731	2.5533	1.4025	2.5371	16.9839	13.3478	18.7852	17.2272
ENSG00000086300	SNX10	chr7:26331540-26413949	protein_coding	3421	3.8415	2.6324	5.9946	6.005	3.1189	2.9614	5.1197	5.0186	0.7906	0.5496	0.9712	0.7988	0.9203	0.1207	0.274	0.1653	0.19	0.218	0.1028	0.1074
ENSG00000086475	SEPHS1	chr10:13359423-13390297	protein_coding	3979	78.7684	49.2851	105.538	82.4284	16.6401	14.1606	16.6686	16.0278	25.8774	22.2691	25.7005	36.4101	12.0531	9.3669	5.8047	8.5622	3.8389	5.3427	10.198	9.8143
ENSG00000086504	MRPL28	chr16:417383-420527	protein_coding	2404	17.1434	17.0348	19.541	19.5342	13.619	13.9432	17.1189	16.2095	12.6864	14.7571	13.231	17.8619	12.0613	16.8284	11.1812	10.9321	11.6941	11.461	17.6232	18.8424
ENSG00000086506	HBQ1	chr16:230451-231180	protein_coding	536	0.9014	0.657	0.1596	0.1198	0.6817	0.9334	0.2506	0.3153	0	0.305	0	0.1912	0.1366	0	0	0	0.1011	0	0	0.1469
ENSG00000086544	ITPKC	chr19:41223007-41246765	protein_coding	3385	3.0259	3.1806	4.2215	4.6749	4.1236	3.2885	5.3964	4.4729	3.0584	3.7189	4.1281	4.612	4.7804	4.1115	7.031	5.6686	3.2644	3.3742	5.8898	5.9388
ENSG00000086548	CEACAM6	chr19:42254884-42276113	protein_coding	3052	0	0	0	0	0	0	0	0	0.0306	0	0	0.0112	0	0	0.011	0.0428	0	0	0	0
ENSG00000086570	FAT2	chr5:150883653-150948505	protein_coding	14537	0.3955	0.2457	0.2531	0.2385	0.0754	0.086	0.0702	0.0465	0.0128	0.0281	0.037	0.0164	0.1158	0.0041	0.0023	0.006	0	0.0128	0.0081	0.0072
ENSG00000086589	RBM22	chr5:150070355-150080669	protein_coding	3631	9.8865	8.6181	12.7098	10.6966	12.0157	11.5221	14.53	14.9856	12.9458	13.1922	14.0886	18.6751	12.684	12.847	15.7091	11.4919	4.9229	5.0844	7.8405	7.618
ENSG00000086598	TMED2	chr12:124069077-124083116	protein_coding	3822	38.0755	31.3281	63.5748	54.1862	31.8557	30.3519	47.2594	46.9016	33.407	31.1613	36.8682	54.5572	23.7554	27.8509	36.0664	37.0675	43.2116	28.4328	79.1435	75.6831
ENSG00000086619	ERO1LB	chr1:236378854-236445319	protein_coding	5688	0.705	0.5838	0.8826	1.123	0.2698	0.2419	0.3778	0.3268	0.7707	0.618	1.2198	0.8168	0.8496	0.2696	0.971	1.3922	0.1238	0.2623	0.6959	0.5998
ENSG00000086666	ZFAND6	chr15:80351909-80430735	protein_coding	5065	11.8283	11.9987	21.4946	20.2224	6.9257	7.5068	12.368	12.2709	9.3174	8.7633	13.2639	12.0052	9.8446	11.3638	16.7931	17.98	7.3042	10.5297	16.5264	16.0003
ENSG00000086696	HSD17B2	chr16:82068608-82132139	protein_coding	2688	0	0.0187	0.0743	0.0239	0	0	0	0	0	0	0.1454	0.1906	0.0545	0.1536	0.5106	0.1457	0.3829	1.0059	0.0654	0.0683
ENSG00000086712	TXLNG	chrX:16804549-16862642	protein_coding	4460	23.8325	21.7368	31.0806	30.3424	15.3863	13.7972	15.8948	17.5955	12.1706	10.2086	11.5027	12.1937	7.1743	5.8841	8.0833	7.4047	2.4533	4.1811	5.5089	5.696
ENSG00000086717	PPEF1	chrX:18694028-18846039	protein_coding	3515	0.0412	0.0286	0.073	0.1096	0.0416	0.0534	0.0764	0.0962	0.0531	0.0698	0.0973	0.1069	0.2291	0.1007	0.4	0.3342	0.0154	0.1061	0.1251	0.0896
ENSG00000086730	LAT2	chr7:73613981-73644161	protein_coding	4542	0.0638	0.0443	0.0377	0.0777	0.0161	0.0138	0.0118	0.0149	0.0616	0.144	0.0108	0.0602	0.0645	0.1298	0.0663	0.0287	0.1312	0.195	0.0258	0.0636
ENSG00000086758	HUWE1	chrX:53559056-53713673	protein_coding	17373	37.6386	37.9006	22.924	28.9945	31.9741	35.0279	24.5635	22.428	30.6486	34.6627	21.6131	17.9328	24.3141	23.4425	13.921	14.8067	18.6605	18.7681	12.9914	13.6952
ENSG00000086827	ZW10	chr11:113603908-113644533	protein_coding	2992	12.2564	8.4577	18.2555	15.4485	12.7989	11.3075	15.8016	16.7967	11.783	10.5456	11.5126	17.5143	6.5585	7.8841	7.7755	8.0565	3.8923	4.3316	8.5743	7.9469
ENSG00000086848	ALG9	chr11:111652918-111742305	protein_coding	8014	0.7837	0.5022	1.114	1.0734	1.8694	1.7011	2.2291	2.4671	2.2694	2.193	2.896	2.6343	1.6446	1.2215	2.2347	1.9546	0.6489	0.7911	1.3244	1.1134
ENSG00000086967	MYBPC2	chr19:50936159-50969578	protein_coding	3708	0.7688	0.7734	0.5692	0.9003	0.1774	0.2192	0.1594	0.1732	0.5031	1.1463	1.041	3.5653	11.611	21.2799	24.952	15.4659	49.726	29.0178	5.7326	5.0959
ENSG00000086991	NOX4	chr11:89057523-89322779	protein_coding	6327	0.6567	0.4055	0.4959	0.4109	0.2541	0.2965	0.3906	0.4113	1.7394	1.0336	0.6178	0.9665	0.5208	0.1491	0.2804	0.2407	0.8048	0.2505	0.4078	0.4023
ENSG00000087008	ACOX3	chr4:8368008-8442450	protein_coding	3846	2.4497	1.8837	1.9801	1.9196	3.5913	3.0569	3.9533	3.7962	5.3351	5.9298	4.4972	3.3397	5.3878	9.3228	3.9949	4.1294	4.4787	3.988	5.7937	6.3665
ENSG00000087053	MTMR2	chr11:95566045-95658479	protein_coding	6119	12.6808	8.082	16.24	15.5955	13.1973	12.8057	20.2865	18.1107	8.5051	7.1737	9.3183	10.9757	5.3249	4.7128	6.0558	6.4708	3.3816	3.5885	8.251	7.6729
ENSG00000087074	PPP1R15A	chr19:49375648-49379314	protein_coding	3093	9.4662	8.3117	5.616	8.8107	18.855	20.4815	18.8291	21.6024	24.274	46.8836	30.8194	71.8448	31.4377	35.0634	60.3245	37.1384	16.567	15.0726	20.1149	19.422
ENSG00000087076	HSD17B14	chr19:49316273-49339935	protein_coding	1281	3.5831	4.0844	3.8075	3.3577	3.9364	4.1496	4.0682	4.2741	1.893	1.5953	2.1359	0.6667	1.6004	0.0921	0.2874	0.2378	1.2685	0.3275	1.9226	1.7209
ENSG00000087077	TRIP6	chr7:100464759-100471076	protein_coding	2802	19.2432	16.5363	17.0097	17.7561	10.4326	10.1772	10.4019	9.7458	12.6818	13.3612	11.1599	11.3991	7.8133	4.1252	5.7223	6.9568	4.0209	4.0763	10.9659	11.1082
ENSG00000087085	ACHE	chr7:100487614-100494594	protein_coding	3730	1.2046	0.8632	0.5353	0.3614	0.2547	0.3018	0.144	0.1993	0.6251	1.4902	0.8776	1.099	14.1533	21.0753	9.1089	7.2091	2.2364	2.8372	1.069	1.2594
ENSG00000087086	FTL	chr19:49468557-49470135	protein_coding	878	598.82	574.717	955.568	889.984	568.331	557.2	690.997	625.394	303.488	269.433	318.364	324.8	221.329	70.66	169.238	151.149	292.118	541.701	832.659	843.572
ENSG00000087087	SRRT	chr7:100472732-100486285	protein_coding	4587	28.1548	25.884	28.4043	26.6683	17.6369	16.4691	15.812	16.9315	20.9021	19.4065	12.6968	21.0535	10.8705	10.6709	6.8524	6.659	5.432	6.0574	8.4052	8.4276
ENSG00000087088	BAX	chr19:49458071-49465055	protein_coding	2587	19.6659	15.4214	26.0197	24.7656	9.8307	10.1286	17.1436	18.564	6.8138	4.6448	6.4969	11.0392	6.6796	5.0835	10.2609	8.6618	5.6323	7.2083	19.3799	20.0761
ENSG00000087095	NLK	chr17:26368762-26523407	protein_coding	5288	9.8128	8.3817	9.1965	9.3418	5.4866	5.4163	5.4203	6.0141	3.9684	4.2973	3.5757	3.4755	4.0016	3.8252	3.7095	4.3939	3.1242	2.9622	3.4653	3.608
ENSG00000087111	PIGS	chr17:26880400-26898890	protein_coding	5990	4.154	4.149	5.2902	5.6159	5.2218	5.8465	6.4623	6.1387	4.7645	5.0355	5.1388	4.7905	5.5496	5.2967	6.6557	5.7603	6.3391	8.4367	8.7664	9.2577
ENSG00000087116	ADAMTS2	chr5:178537851-178772431	protein_coding	7687	1.0308	1.5446	0.8571	1.403	0.7986	0.9274	1.2021	1.4861	1.3953	1.7439	1.6272	0.9466	1.4288	0.0921	0.074	0.0962	3.8967	1.3646	7.8609	8.2757
ENSG00000087128	TMPRSS11E	chr4:69313166-69363322	protein_coding	2138	1.3333	0.9177	2.0145	1.8466	0.2051	0.1755	0.4021	0.4584	0	0	0	0.0639	0	0	0	0	0	0	0	0
ENSG00000087152	ATXN7L3	chr17:42269172-42277481	protein_coding	5301	13.079	13.2393	16.2601	15.8464	9.6641	9.0837	10.7938	11.1636	12.6678	13.4464	13.6504	15.4403	11.1606	10.5686	13.8859	12.5666	5.2726	5.8659	11.1337	11.362
ENSG00000087157	PGS1	chr17:76374720-76421195	protein_coding	4965	6.2376	5.9885	6.8707	7.2795	4.0331	4.3958	4.9505	5.3299	6.0675	6.2562	6.1111	5.1327	4.9551	4.2997	5.0632	6.4149	2.7165	2.8732	5.1847	6.0945
ENSG00000087191	PSMC5	chr17:61904511-61909379	protein_coding	4483	12.2108	9.2135	23.5217	21.0792	8.4443	7.0725	15.3279	15.4773	7.9681	6.0901	10.3647	17.9224	4.5405	5.8539	7.1159	7.6482	5.2077	3.4213	14.9964	14.1728
ENSG00000087206	UIMC1	chr5:176332005-176449634	protein_coding	4852	9.3304	7.984	13.6851	13.1053	9.2932	9.6408	15.5131	15.4635	8.131	8.0361	12.3457	9.554	5.5534	4.9711	8.403	8.6717	2.2439	2.7576	5.233	4.8626
ENSG00000087237	CETP	chr16:56995761-57017757	protein_coding	2085	0	0	0	0	0	0	0	0	0.0447	0	0	0	0	0	0	0	0	0.0224	0	0.0503
ENSG00000087245	MMP2	chr16:55423611-55540603	protein_coding	4933	6.2683	5.6296	4.9725	5.0819	24.7701	26.267	24.4613	25.8699	11.4196	13.3724	8.3496	10.2974	12.6017	0.9325	0.3529	0.8027	37.3776	30.0811	41.8481	43.3373
ENSG00000087250	MT3	chr16:56622985-56625000	protein_coding	1837	0	0	0.0155	0	0	0	0	0.1288	0	0.0445	0.133	0.0186	0.1196	0	0.0182	0.0237	0.1769	0.3299	0.2873	0.4857
ENSG00000087253	LPCAT2	chr16:55542909-55620582	protein_coding	7439	0.565	0.4666	0.6058	0.7465	1.0806	1.1685	1.448	1.522	0.514	0.3516	0.5386	0.3766	0.6299	0.0872	0.1035	0.0819	7.4781	0.7458	3.4802	3.3021
ENSG00000087258	GNAO1	chr16:56225301-56391356	protein_coding	9813	2.3042	2.0456	1.0144	1.4262	0.2011	0.2931	0.1177	0.1068	0.1045	0.1333	0.0697	0.1358	1.0222	0.0601	0.0648	0.0133	0	0.0048	0.003	0.0428
ENSG00000087263	OGFOD1	chr16:56485401-56513012	protein_coding	5806	10.5601	8.0585	13.2394	11.6154	8.169	7.6797	9.8642	9.9656	7.6785	8.4192	8.5584	10.5554	5.3093	6.267	6.3938	6.1452	5.4857	5.5243	9.8976	9.4697
ENSG00000087266	SH3BP2	chr4:2794749-2842825	protein_coding	13968	3.8948	3.4469	2.3953	2.7277	3.856	3.7473	2.8617	2.7317	3.599	3.9092	3.1027	2.7171	3.5541	1.0682	1.874	1.7974	1.5822	1.582	2.0151	2.0273
ENSG00000087269	NOP14	chr4:2939659-2965112	protein_coding	3538	16.4965	12.0014	18.8726	16.394	21.6681	18.6654	24.7065	23.6902	17.5303	15.4797	16.0471	21.6088	8.4644	9.5177	9.8492	10.3551	6.5374	7.603	12.9525	12.128
ENSG00000087274	ADD1	chr4:2845583-2931803	protein_coding	13106	11.7599	9.8269	10.0893	8.9639	10.1095	10.2016	9.2993	8.5459	13.6349	13.8088	12.0228	11.8387	12.3356	9.9308	10.0146	10.4213	10.8243	9.5935	14.2279	14.3615
ENSG00000087299	L2HGDH	chr14:50704280-50779266	protein_coding	3911	5.5468	5.3512	5.6082	6.6232	3.2327	3.7256	4.2791	3.6813	2.5755	2.0901	2.1113	2.2186	1.7973	1.4023	2.2938	1.9803	0.7202	1.1443	0.9896	0.8723
ENSG00000087301	TXNDC16	chr14:52897307-53019240	protein_coding	4739	5.1384	5.6477	10.2679	10.2209	6.9241	6.5321	10.4186	9.6705	5.117	4.5364	8.0109	4.6278	2.9202	0.9582	3.6024	3.3421	1.1087	1.4363	1.5343	1.5229
ENSG00000087302	C14orf166	chr14:52456192-52471420	protein_coding	2334	53.7385	43.3039	101.674	96.5706	42.0511	41.3693	78.4591	76.8608	39.8	36.3533	60.31	61.0035	26.5714	28.88	54.5565	51.0612	19.5873	27.6242	67.2307	62.5402
ENSG00000087303	NID2	chr14:52471520-52535712	protein_coding	6158	3.0991	2.4673	1.6489	2.2726	17.6115	20.209	25.1179	32.3259	6.0128	4.5663	3.9751	3.4283	6.504	0.2681	0.3044	0.7207	3.8087	19.1308	12.26	13.676
ENSG00000087338	GMCL1	chr2:70056773-70108528	protein_coding	4922	6.7535	4.8858	8.4837	7.3301	5.36	4.574	6.0308	5.9326	6.4426	4.6335	5.5987	5.6981	2.9604	1.6894	3.9377	3.7924	1.6728	1.9701	3.4311	3.4285
ENSG00000087365	SF3B2	chr11:65818199-65836779	protein_coding	9795	23.4447	18.9783	24.3468	23.4111	24.0916	22.7927	27.8391	25.2811	20.0149	18.2679	19.9078	22.4146	13.9414	12.1618	16.7933	15.2855	6.8241	7.6771	13.5326	13.6913
ENSG00000087448	KLHL42	chr12:27932952-27955973	protein_coding	7622	6.4466	5.452	7.7761	7.214	4.353	3.7988	4.55	4.7046	7.7946	7.1211	8	9.013	4.2941	2.6306	3.1752	3.1055	1.4355	2.0429	4.9891	4.817
ENSG00000087460	GNAS	chr20:57414772-57486247	protein_coding	13320	38.0462	36.8859	45.1242	39.4195	129.334	130.068	144.966	142.124	76.6857	78.5021	70.5818	59.925	55.6519	57.5517	53.5859	57.0053	35.1393	87.7267	45.9136	45.9564
ENSG00000087470	DNM1L	chr12:32832133-32898486	protein_coding	7184	15.6835	11.3728	20.1452	20.1643	17.8734	17.4534	25.1091	24.5525	17.9029	15.8273	19.3016	20.3852	10.712	11.6402	13	14.2271	5.4287	8.4102	13.4026	12.8845
ENSG00000087494	PTHLH	chr12:28111016-28125638	protein_coding	3377	0.0572	0.0298	0.0084	0.038	0.0433	0	0	0	0.0829	0.0484	0.0289	0.1821	0.0867	0	0.0396	0.0515	0.2406	0.6212	0.7293	0.6683
ENSG00000087495	PHACTR3	chr20:58152563-58422766	protein_coding	6095	0.0079	0.0083	0.0328	0.0105	0.012	0	0	0.0055	0.4744	0.7376	0.6493	1.1714	0.8529	0.1355	0.0659	0.0857	0.0267	0	0.0192	0.0172
ENSG00000087502	ERGIC2	chr12:29490284-29534122	protein_coding	5826	4.8846	4.9308	9.1452	9.3111	4.9172	5.1201	6.2569	6.7234	8.8848	8.5025	11.0281	11.0351	6.8244	7.1464	9.0034	10.0226	6.8429	7.1138	13.014	12.6355
ENSG00000087510	TFAP2C	chr20:55204357-55214339	protein_coding	3112	6.8156	8.1639	6.9656	8.3856	0.1879	0.2612	0.259	0.2715	0.03	0.0263	0.0785	0.1537	0.1647	0.0758	0.0968	0.0979	0	0	0.179	0.1265
ENSG00000087586	AURKA	chr20:54944444-54967393	protein_coding	2928	24.3225	20.9622	36.7733	33.3921	17.4715	17.3427	28.5692	23.8586	14.334	10.8599	14.2006	10.4302	4.6763	4.713	3.4869	5.2606	1.0915	1.7833	6.4787	5.3868
ENSG00000087589	CASS4	chr20:54987167-55034396	protein_coding	4025	0	0	0.0071	0.008	0	0.0311	0.02	0.0252	2.3403	4.4679	4.9406	2.945	10.3145	15.6919	10.7699	14.9829	1.6284	2.8261	5.5361	6.0769
ENSG00000087842	PIR	chrX:15402920-15511687	protein_coding	2512	7.078	6.6091	10.2985	11.053	10.7643	8.7133	12.9288	10.2386	4.0099	5.4668	5.1932	4.2701	3.352	3.0989	2.3986	2.8753	1.5957	4.1572	6.151	5.4849
ENSG00000087884	AAMDC	chr11:77532154-77629478	protein_coding	1943	2.2628	2.2268	5.314	5.8481	2.9714	3.2507	7.7975	6.7837	3.0241	3.9125	5.6831	5.5206	2.9017	2.155	3.0666	3.9189	3.9865	3.3831	8.8878	8.0366
ENSG00000087903	RFX2	chr19:5993174-6199583	protein_coding	9094	0.5313	0.5643	0.5018	0.4377	1.0126	0.8114	0.703	0.55	1.3333	1.4562	0.8919	0.8151	1.0628	0.2788	0.2098	0.3445	0.2442	0.2307	0.1676	0.2049
ENSG00000087916	SLC6A14	chrX:115567789-115592625	protein_coding	4521	0	0	0	0	0	0	0	0	0	0	0.0216	0.0227	0.0486	0	0	0	0	0	0	0
ENSG00000087995	METTL2A	chr17:60501227-60527454	protein_coding	3114	7.3543	5.6869	10.5334	9.6275	6.4538	5.7034	8.083	8.2375	7.1882	5.9587	7.2332	8.3482	4.2324	4.7156	6.5787	6.651	2.8179	3.1439	4.7924	5.3179
ENSG00000088002	SULT2B1	chr19:49055331-49102682	protein_coding	2822	0.137	0.3031	0.1415	0.2389	0.0259	0	0.0666	0.0359	0	0.1159	0.0173	0.0605	0.0778	0.0418	0.0474	0.0154	0	0	0.0727	0.0093
ENSG00000088035	ALG6	chr1:63833260-63904233	protein_coding	4950	5.788	4.726	9.4153	9.6425	3.5433	3.3858	4.7919	4.438	3.0712	3.1706	4.1752	3.7128	2.1448	1.3343	1.9881	2.6458	0.6128	1.6105	1.6407	1.8503
ENSG00000088038	CNOT3	chr19:54641443-54659419	protein_coding	6697	6.1178	5.7694	3.075	3.4605	4.8124	5.1452	2.884	2.8311	5.2643	4.3941	2.4076	2.1271	3.8267	3.0028	2.2043	2.248	1.2699	1.0024	1.0945	0.9914
ENSG00000088053	GP6	chr19:55525072-55549632	protein_coding	2703	0.0357	0.0744	0.0528	0.0713	0.0541	0.0694	0.0398	0.0125	0.0345	0.0302	0.0542	0.0632	0.0813	0.0873	0.0495	0	0.0802	0.0172	0.0108	0
ENSG00000088179	PTPN4	chr2:120517206-120741394	protein_coding	12542	5.9402	5.1585	9.4741	8.9677	4.9936	4.5224	5.3139	5.6885	3.733	3.4738	4.1606	3.086	3.0883	2.3839	2.765	3.2056	1.7016	1.9292	2.0735	1.9816
ENSG00000088205	DDX18	chr2:118572225-118589955	protein_coding	7851	16.7573	12.1047	24.726	21.2804	14.5119	13.8677	19.2429	19.8235	11.4281	9.7349	10.7539	16.295	7.9833	9.2091	10.1731	9.2221	3.3324	4.9464	11.1474	10.055
ENSG00000088247	KHSRP	chr19:6413358-6424805	protein_coding	4563	47.8385	40.7722	26.6597	27.4346	44.3161	40.2518	25.6559	25.7012	32.8466	28.4656	16.6826	21.868	17.908	14.3329	12.5811	11.9863	6.9919	7.162	9.2269	8.9148
ENSG00000088256	GNA11	chr19:3094407-3124002	protein_coding	6242	3.7773	4.3201	2.6914	2.5352	2.4352	2.2542	1.3944	1.6785	6.4698	7.0585	3.6789	6.3101	5.2082	6.0088	4.0971	4.1406	5.9964	5.1086	6.078	6.7859
ENSG00000088280	ASAP3	chr1:23755055-23811061	protein_coding	4988	9.3182	10.5097	11.5622	12.748	4.6591	4.3003	4.987	5.1495	11.7985	11.0945	15.1828	11.3276	12.5361	3.9252	12.6635	11.4797	6.8089	14.7018	16.3818	17.2259
ENSG00000088298	EDEM2	chr20:33703166-33865928	protein_coding	3380	4.4027	5.5072	6.8437	8.471	2.6594	2.8308	3.6718	3.9696	2.649	2.7086	3.1224	3.2443	2.3613	2.1286	2.7136	3.5015	5.7051	2.7861	7.4079	7.7101
ENSG00000088305	DNMT3B	chr20:31350190-31397162	protein_coding	4630	295.16	347.949	321.127	337.547	23.5184	23.6908	24.983	25.2855	3.6863	3.7605	3.0286	7.8872	3.6373	3.006	1.6629	2.34	0.1989	1.3895	2.039	1.8535
ENSG00000088320	REM1	chr20:30063095-30072708	protein_coding	1665	0	0	0	0	0	0	0	0	0	0	0	0	0	0	0	0	0	0	0	0
ENSG00000088325	TPX2	chr20:30327073-30389608	protein_coding	3605	59.2244	46.5134	54.3312	50.1378	54.6737	55.9097	53.1816	43.4717	50.9408	37.3226	32.9885	28.3615	13.6895	6.2326	3.482	5.4675	0.4357	1.8881	6.4738	5.9404
ENSG00000088340	FER1L4	chr20:34146506-34195484	pseudogene	9212	0.472	0.5898	0.3654	0.5296	2.4514	2.6747	3.1144	3.1625	0.3746	0.5324	0.8964	0.3486	0.7074	0.0128	0.1017	0.052	0.0118	0.1316	0.5283	0.3675
ENSG00000088356	PDRG1	chr20:30532757-30539895	protein_coding	1385	8.163	5.8482	13.9008	13.5115	5.8042	5.6892	11.8506	11.2737	7.0707	6.079	11.3241	13.911	6.1325	9.5378	19.3593	14.2314	4.0283	5.0491	10.3305	9.2659
ENSG00000088367	EPB41L1	chr20:34679425-34820721	protein_coding	7859	4.2419	3.7577	2.8889	2.8958	2.6781	3.1829	2.0816	1.9137	2.7058	2.7667	2.4184	1.3388	2.972	0.8554	1.0989	1.2069	3.0602	2.0821	1.9064	2.0236
ENSG00000088386	SLC15A1	chr13:99336054-99404908	protein_coding	4192	0.2075	0.36	0.3742	0.4901	0	0	0.0192	0.0161	0	0	0	0.0081	0.2795	0	0.008	0	0	0	0	0
ENSG00000088387	DOCK9	chr13:99445740-99738879	protein_coding	10061	2.0649	2.1102	2.3814	2.4119	1.5254	1.5477	1.6714	1.7233	19.5784	17.9799	19.4009	12.1045	11.9717	11.5179	14.9886	17.9692	6.2506	4.1472	8.3694	8.3393
ENSG00000088448	ANKRD10	chr13:111530886-111567416	protein_coding	4557	20.5898	22.9963	23.5904	24.0334	20.0302	20.4886	19.1405	18.9861	23.4752	22.0993	20.9611	23.3136	16.389	17.8329	18.9737	20.71	34.8037	19.499	19.1794	19.3504
ENSG00000088451	TGDS	chr13:95226307-95248511	protein_coding	2586	4.5774	4.0076	8.7244	7.1247	3.589	4.0627	7.2195	7.1488	3.1377	3.4454	4.44	5.1122	2.6898	1.984	4.0257	4.9804	1.3406	1.28	3.8888	3.2983
ENSG00000088538	DOCK3	chr3:50712671-51421629	protein_coding	8755	4.1058	5.3843	2.7627	4.6892	0.8848	0.9072	0.5277	0.4787	0.3196	0.0747	0.1451	0.0858	0.7527	0.0674	0.065	0.0895	1.256	0.3301	0.3148	0.4257
ENSG00000088543	C3orf18	chr3:50595461-50608458	protein_coding	3242	2.7719	2.607	3.7743	4.0791	2.4345	2.797	4.0601	3.461	2.848	2.1684	3.7074	3.1611	3.3652	2.4011	5.7407	5.0061	1.6708	1.855	2.4689	2.8251
ENSG00000088682	COQ9	chr16:57481336-57495187	protein_coding	4324	3.4415	3.7348	5.8839	5.716	2.1634	2.6467	3.274	3.2359	5.4571	5.6902	5.7289	7.4184	4.7583	6.9011	4.5984	4.9307	4.6225	7.3638	6.706	6.6702
ENSG00000088726	TMEM40	chr3:12775023-12810956	protein_coding	3562	0.0271	0.0424	0.048	0.027	0	0	0.0151	0	0	0	0	0	0.0206	0	0.0094	0.0244	0.0608	0.5104	0.1317	0.1105
ENSG00000088727	KIF9	chr3:47269515-47324941	protein_coding	5867	0.2388	0.2744	0.4473	0.465	0.3239	0.2771	0.4029	0.3456	0.6836	0.822	0.4664	1.1994	0.5491	0.583	0.4736	0.4969	0.7017	0.445	0.5247	0.5144
ENSG00000088756	ARHGAP28	chr18:6729716-6915715	protein_coding	11910	2.0608	1.3982	2.7062	2.2504	8.296	8.4484	15.2786	17.761	12.2711	10.9264	18.3499	12.9845	8.5393	5.5408	6.3603	8.494	1.0142	4.3371	4.7241	4.0875
ENSG00000088766	CRLS1	chr20:5986735-6020699	protein_coding	5370	5.3353	4.7967	7.8663	6.1866	6.1241	6.5564	9.8997	9.7488	5.5057	5.008	5.6684	6.9212	3.3815	3.2616	4.1827	4.0918	4.0751	3.9761	5.7601	5.6251
ENSG00000088782	DEFB127	chr20:138110-139804	protein_coding	514	0	0	0	0	0	0	0	0	0	0	0	0	0	0	0	0	0	0	0	0
ENSG00000088808	PPP1R13B	chr14:104200088-104313927	protein_coding	9031	0.7918	0.8746	0.6285	0.5545	0.5098	0.3878	0.2439	0.2807	0.4751	0.3983	0.4382	0.2988	0.754	0.333	0.556	0.3758	0.1679	0.2478	0.1493	0.1482
ENSG00000088812	ATRN	chr20:3451686-3631769	protein_coding	8753	7.6008	6.7765	7.5404	7.5286	6.6543	7.266	7.4576	7.3864	9.0571	10.338	9.7406	9.7061	7.6123	5.7807	6.203	6.5269	8.212	6.2635	8.8899	8.9109
ENSG00000088826	SMOX	chr20:4101626-4168394	protein_coding	4943	2.1113	1.4249	1.8465	1.8442	1.8777	1.6826	2.2336	1.9281	2.1887	2.7617	3.1828	2.0802	2.1923	1.2408	2.4582	2.4119	0.8547	1.7354	3.1022	3.2228
ENSG00000088827	SIGLEC1	chr20:3667616-3687775	protein_coding	7886	0	0	0	0.0122	0	0.0079	0.0136	0.0043	0.0118	0	0.0124	0.0043	0.0186	0.0075	0.0127	0.0221	0.0137	0.0118	0	0
ENSG00000088832	FKBP1A	chr20:1349621-1373806	protein_coding	2369	28.2058	27.3526	36.517	34.1038	26.9927	31.3341	35.2198	33.6255	26.9287	25.4992	26.5643	33.0072	19.6573	21.0849	15.4299	19.6709	30.3416	18.7147	52.1781	50.1172
ENSG00000088833	NSFL1C	chr20:1422806-1454487	protein_coding	6617	6.2867	5.1549	5.5562	5.8842	5.4559	4.6687	4.7417	4.1729	6.8642	4.6696	5.2573	6.128	6.2631	6.2743	7.6236	6.4244	5.6729	3.2761	6.8945	6.4767
ENSG00000088836	SLC4A11	chr20:3208062-3219836	protein_coding	4081	2.2021	2.108	1.0693	1.345	0.1074	0.1532	0.1185	0.1242	0.32	0.3605	0.1676	0.3516	0.4844	0.3468	0.5414	0.4158	0.2389	0.4341	0.4167	0.3987
ENSG00000088854	C20orf194	chr20:3229950-3388272	protein_coding	8864	1.9404	2.1908	2.1012	2.4552	1.7561	2.2506	2.2002	2.2114	4.1772	5.6253	5.0215	3.5841	4.7828	3.2933	2.9796	3.4067	2.0471	3.3871	3.5194	3.5677
ENSG00000088876	ZNF343	chr20:2462462-2505348	protein_coding	4520	1.5285	1.0017	2.4168	1.8464	2.4899	2.6287	4.0948	3.6264	2.8888	3.5265	4.5724	3.8091	2.4785	1.7222	3.2511	3.3403	0.5872	1.0417	2.9254	2.5779
ENSG00000088881	EBF4	chr20:2673523-2740753	protein_coding	3716	0.6241	0.9071	0.3915	0.5615	1.947	1.9858	1.9374	2.1555	2.1836	2.9037	2.1169	1.1399	2.0886	0.5554	2.1079	1.7798	0.0292	0.414	0.4182	0.4449
ENSG00000088882	CPXM1	chr20:2774714-2781283	protein_coding	2391	20.9143	18.3689	20.9594	19.976	52.5716	57.6453	69.4208	70.5053	34.0533	32.4439	35.495	34.8323	23.7637	3.1077	4.186	5.6049	0.3172	25.4838	32.5933	33.8394
ENSG00000088888	MAVS	chr20:3827486-3849280	protein_coding	4240	11.2811	9.2669	7.0768	7.8581	10.2899	10.5751	8.3629	7.7557	8.6667	10.4684	6.3609	7.2592	9.5497	8.6929	6.1264	5.7673	7.1669	8.8841	7.3436	7.378
ENSG00000088899	LZTS3	chr20:3143262-3154192	protein_coding	5349	4.2001	5.6526	3.242	4.6026	1.9537	2.1629	1.7125	1.4785	1.1334	1.0239	0.9408	1.1368	1.889	0.43	1.5144	0.9517	0.9013	0.767	0.718	0.5348
ENSG00000088926	F11	chr4:187187098-187210835	protein_coding	4243	0.0114	0.0474	0.0807	0.0378	0	0	0	0	0	0	0.0115	0.0081	0.0173	0.0278	0	0.0103	0	0.011	0	0
ENSG00000088930	XRN2	chr20:21283941-21370463	protein_coding	3489	56.6514	50.6409	90.5215	82.3853	56.7637	52.248	72.9891	75.12	45.9783	50.5589	63.6893	61.7518	29.9681	29.0554	31.3056	34.4821	14.7177	24.3053	38.3864	36.8197
ENSG00000088970	PLK1S1	chr20:21106623-21227260	processed_transcript	4802	6.2582	7.8261	10.2816	11.3367	2.9068	2.2399	3.3676	3.2797	7.128	5.1068	8.0279	3.9269	5.9314	5.3422	7.884	8.5536	3.7675	1.932	4.5121	4.0388
ENSG00000088986	DYNLL1	chr12:120907652-120936296	protein_coding	2957	35.1619	31.7984	75.9506	65.8578	20.3647	23.0731	39.5538	40.883	24.318	29.0535	35.0128	46.8108	18.5465	23.7926	37.685	38.1108	20.5896	24.8627	55.9812	53.9789
ENSG00000088992	TESC	chr12:117476727-117537284	protein_coding	1926	1.7309	1.7501	2.0289	2.0332	0.0759	0.0649	0.0279	0.0175	0.2905	0.1273	0.2791	0.3547	0.1901	0	0.0174	0.0226	0.0281	0.1694	0.0457	0.0273
ENSG00000089006	SNX5	chr20:17922240-17949623	protein_coding	7894	19.4998	16.0985	25.2273	24.4988	17.6082	16.652	23.2523	24.091	20.7823	17.9866	23.5569	19.5773	9.0343	6.3425	9.859	10.4451	2.6486	4.1753	9.4116	9.1225
ENSG00000089009	RPL6	chr12:112842993-112856642	protein_coding	4447	182.939	152.964	244.676	245.918	203.482	202.768	295.412	296.624	257.589	242.764	362.682	361.242	182.697	240.48	340.467	359.428	52.8513	130.109	212.744	210.247
ENSG00000089012	SIRPG	chr20:1609797-1638425	protein_coding	2242	0	0	0	0	0	0	0	0	0	0.0365	0	0	0	0	0	0	0	0	0	0
ENSG00000089022	MAPKAPK5	chr12:112279781-112334343	protein_coding	5576	9.8952	8.824	12.297	12.1751	8.0866	8.6918	9.6544	9.5887	7.7945	7.7403	7.2553	8.0623	5.3839	4.516	6.1173	5.7822	2.3606	2.6922	4.4273	4.443
ENSG00000089041	P2RX7	chr12:121570621-121623876	protein_coding	3587	0.1616	0.0982	0.1034	0.0895	0.2037	0.2266	0.2546	0.3015	0	0.0684	0.0409	0.1524	0.2041	0	0	0	0	0.013	0.0163	0.0219
ENSG00000089048	ESF1	chr20:13694968-13765532	protein_coding	3216	16.9613	13.0153	26.3496	26.8885	14.5661	13.359	22.8534	24.1495	15.2834	10.1161	17.2436	16.1775	7.9686	8.7836	12.9691	13.7596	3.7223	6.8277	11.6055	10.6249
ENSG00000089050	RBBP9	chr20:18467183-18477887	protein_coding	3861	6.5822	4.8342	7.9118	7.1164	8.4986	8.5682	10.2553	10.0314	11.0151	7.791	10.1237	10.4491	5.6513	3.9101	3.8147	4.3274	2.7217	2.922	6.2648	6.1447
ENSG00000089053	ANAPC5	chr12:121746047-121837699	protein_coding	12304	8.3287	7.6584	12.1703	11.9039	9.3786	9.3926	13.0187	12.6271	10.4682	9.9122	12.6238	11.0723	7.1411	5.6222	8.8772	8.8019	6.5904	6.2442	11.5547	11.2535
ENSG00000089057	SLC23A2	chr20:4833001-4990939	protein_coding	7523	4.7332	4.1529	3.6738	3.7035	4.0411	3.1505	2.521	2.6685	5.0954	5.2481	4.0721	3.6463	5.285	4.0684	3.306	2.4986	4.3633	2.3053	3.8856	4.2001
ENSG00000089060	SLC8B1	chr12:113736563-113797298	protein_coding	6768	2.0988	2.1929	2.183	2.6701	0.4427	0.5821	0.5874	0.5193	0.8406	0.9904	1.0684	1.0499	0.6816	0.1046	0.3907	0.315	0.8884	1.0126	1.4426	1.5007
ENSG00000089063	TMEM230	chr20:5080485-5093749	protein_coding	2038	18.4678	18.6376	27.8787	25.8773	21.3361	21.6023	27.4427	27.4619	21.7377	18.2496	21.337	23.3661	13.7962	19.619	11.8095	15.4573	21.9804	21.1138	36.1383	36.0822
ENSG00000089091	DZANK1	chr20:18364010-18447925	protein_coding	6637	1.0337	0.9854	1.3408	1.1897	0.9359	0.9234	0.9835	1.0643	1.2647	0.973	1.0748	0.9213	0.6399	0.4354	0.4085	0.413	0.1469	0.1826	0.4197	0.3717
ENSG00000089094	KDM2B	chr12:121866899-122018920	protein_coding	13623	9.2778	8.0987	7.9184	7.5469	4.3184	4.4161	4.1074	3.8726	3.1082	3.2222	3.0342	2.9013	2.123	0.935	0.946	1.1881	0.8747	0.9308	1.4118	1.2657
ENSG00000089101	C20orf26	chr20:20033157-20341346	protein_coding	7319	0.0264	0.0137	0.0234	0.0132	0.03	0.0684	0	0.0139	0.0255	0.0447	0.0134	0.0513	0.1401	0.1531	0.0137	0.0357	0.0296	0.0446	0.004	0.0072
ENSG00000089116	LHX5	chr12:113899838-113910085	protein_coding	3125	16.2184	8.8383	6.1335	3.8313	0.0234	0	0.0172	0	0.0597	0.2093	0.0469	0.1421	0.6092	0.0566	0.0536	0.0278	0	0.0149	0.0094	0.0084
ENSG00000089123	TASP1	chr20:13246708-13619587	protein_coding	3365	2.1681	2.0782	3.56	3.9491	3.388	3.1222	4.6142	4.1882	3.4923	2.915	3.6445	3.5734	2.1324	1.5072	1.8801	1.7844	0.9819	1.136	2.0214	1.903
ENSG00000089127	OAS1	chr12:113344581-113369990	protein_coding	3910	0.0494	0.0386	0.0365	0.0246	0	0	0	0	0	0	0	0.0175	0.0187	0	0	0	0	0.1192	0.2475	0.3088
ENSG00000089154	GCN1L1	chr12:120565006-120632513	protein_coding	9654	31.3142	29.1933	24.5694	30.1634	21.4231	21.3636	21.7429	19.51	20.0271	21.8877	18.4829	19.3167	14.4939	13.885	15.9915	13.7871	8.4555	10.2907	12.4365	13.2688
ENSG00000089157	RPLP0	chr12:120634488-120639038	protein_coding	4001	290.651	281.209	503.267	477.643	435.324	449.211	758.784	764.088	349.825	365.971	591.172	563.743	268.322	355.724	488.028	489.703	106.953	195.917	344.356	354.9
ENSG00000089159	PXN	chr12:120648249-120703574	protein_coding	7452	11.4174	7.1359	4.4284	4.9922	4.0698	2.9455	2.3034	2.1225	5.3442	7.5797	4.4716	3.351	12.6554	12.6223	10.3404	12.1973	12.9093	7.8951	7.4518	8.019
ENSG00000089163	SIRT4	chr12:120740118-120751052	protein_coding	1222	0.3558	0.6587	1.8906	1.5235	0.5382	0.87	2.2642	1.8807	1.6028	1.9399	2.7588	1.7891	1.8575	2.5095	3.7254	3.9167	0.7979	0.9919	1.9674	1.4389
ENSG00000089169	RPH3A	chr12:113008183-113336686	protein_coding	10381	0.1164	0.0775	0.0357	0.0371	0	0.006	0	0	0.009	0	0.0047	0.0033	0.0212	0.017	0.0032	0.0084	0.0052	0	0	0.0025
ENSG00000089177	KIF16B	chr20:16252748-16554078	protein_coding	6278	2.9937	2.9009	3.0531	3.85	3.1314	2.6895	3.5258	3.8007	8.2154	8.5544	9.5026	9.5768	4.292	3.4944	4.9907	5.2258	1.7429	2.6139	2.4098	2.295
ENSG00000089195	TRMT6	chr20:5917880-5931182	protein_coding	3754	5.457	3.605	7.2484	5.4467	4.497	3.9314	4.5081	4.6185	4.3478	3.3751	3.4881	6.6611	3.2573	4.1787	3.9769	2.8861	2.5107	3.1668	5.0688	4.4602
ENSG00000089199	CHGB	chr20:5892075-5906007	protein_coding	4535	0.9482	0.5325	1.2516	0.9626	0.1611	0.0138	0.0711	0.0671	0.2057	0.1622	0.1508	0.354	0.9687	0.065	0.1107	0.0864	0.2986	0.1645	0.1358	0.11
ENSG00000089220	PEBP1	chr12:118573662-118583389	protein_coding	1780	109.957	102.173	169.484	152.883	88.0253	88.675	111.043	102.472	104.794	94.7384	104.581	136.01	60.3863	71.5957	55.326	64.6799	71.8471	63.9055	107.954	107.556
ENSG00000089225	TBX5	chr12:114791735-114846247	protein_coding	4363	0	0	0	0.0074	0.067	0.1003	0.1909	0.1859	0.0214	0	0.056	0.0157	0.0336	0	0.0153	0	0	0	0	0
ENSG00000089234	BRAP	chr12:112079949-112123790	protein_coding	4686	7.0627	5.7653	8.7527	7.5006	4.7254	5.1246	5.5377	4.8971	6.7074	6.1926	7.111	6.3569	5.7189	5.3612	5.9576	5.5619	2.9361	3.1438	5.7437	5.5277
ENSG00000089248	ERP29	chr12:112451119-112461255	protein_coding	3083	29.7287	30.0256	64.8163	57.9397	42.3124	37.039	71.849	69.9175	14.3696	16.9424	25.8956	24.4211	11.3761	7.4792	12.6491	14.7201	7.9941	12.2031	25.5723	25.7928
ENSG00000089250	NOS1	chr12:117645946-117889975	protein_coding	13144	1.0109	0.8765	0.6076	0.6862	0.0612	0.0523	0.0531	0.036	0.0213	0.0808	0.0446	0.0624	0.0891	0.0673	0.2547	0.2516	0.0082	0	0.0067	0.002
ENSG00000089280	FUS	chr16:31191430-31203127	protein_coding	7218	17.7918	13.8633	20.4336	24.1428	14.3569	16.6954	20.2271	20.9579	16.0483	16.0472	19.5424	23.6967	11.5237	7.7209	16.5886	13.5995	2.2063	2.5189	7.7177	6.4683
ENSG00000089289	IGBP1	chrX:69353298-69386174	protein_coding	1862	14.7384	17.184	28.7216	29.0817	20.8017	22.7374	40.5683	39.9861	21.6386	24.6281	44.7396	23.5199	19.5831	15.7409	47.9278	44.2354	8.4072	13.6203	25.1465	22.6076
ENSG00000089327	FXYD5	chr19:35645632-35660786	protein_coding	2993	10.0246	10.7577	8.4624	10.3063	19.8756	18.7421	17.0798	16.3733	0.2181	0.0819	0.0653	0.2625	0.8807	0	0.0112	0.0291	2.7509	1.1215	4.2025	4.0861
ENSG00000089335	ZNF302	chr19:35168543-35177302	protein_coding	5032	4.2439	3.8992	7.9752	6.7807	6.245	6.798	8.9204	8.785	9.8048	10.5264	13.38	11.6019	8.1485	8.1803	11.2755	13.8955	4.9194	5.3735	6.9511	6.1385
ENSG00000089351	GRAMD1A	chr19:35485687-35517375	protein_coding	5942	8.8304	7.9418	5.765	6.8713	8.474	7.4513	6.9937	6.7343	6.5296	6.0805	4.8267	3.7771	5.6314	2.1636	4.0054	3.6101	2.0511	2.3773	3.3553	3.4538
ENSG00000089356	FXYD3	chr19:35606731-35615228	protein_coding	3385	0.1142	0	0.0758	0.0853	0	0	0	0	0.0276	0	0	0.0303	0.0216	0.0174	0.0099	0	0.096	0.1515	0.0693	0.031
ENSG00000089472	HEPH	chrX:65382390-65488709	protein_coding	7113	8.9117	11.0549	15.0131	16.4757	10.1715	11.2096	17.0852	16.7915	8.8244	10.6071	13.1198	5.7247	7.2572	2.8106	4.1507	5.2179	4.2797	6.2985	26.5328	24.971
ENSG00000089486	CDIP1	chr16:4560675-4588829	protein_coding	4268	9.7468	9.7483	10.0243	10.5065	7.9793	6.872	8.5913	8.1008	6.3591	7.2013	6.9603	6.011	6.2275	4.6841	5.6626	5.8314	6.1807	4.402	6.004	6.6409
ENSG00000089505	CMTM1	chr16:66600293-66613040	protein_coding	1467	0.5928	0.6859	0.1361	0.175	0.0498	0.0853	0.0916	0.023	1.1444	1.7831	0.433	0.2561	0.5989	0.2814	0.1597	0.1186	0.3692	0.3178	0.1799	0.161
ENSG00000089558	KCNH4	chr17:40308908-40333296	protein_coding	3924	0.1108	0.1667	0.0291	0.0491	0	0	0	0.0172	0	0	0.0125	0	0.1493	0	0.0256	0.0111	0	0	0.0075	0.0134
ENSG00000089597	GANAB	chr11:62392297-62414104	protein_coding	4933	57.9035	52.9711	70.7193	79.9632	62.3252	61.2939	86.2135	82.4057	46.9262	42.6359	48.8791	50.6629	31.6007	21.5425	28.8732	31.3301	20.5555	27.3216	62.8464	61.9789
ENSG00000089639	GMIP	chr19:19740284-19754476	protein_coding	3740	2.5579	2.1119	1.4338	1.5792	1.446	1.321	1.142	1.1115	1.8204	1.1802	1.1496	0.9956	2.4864	0.678	1.1188	1.0238	3.0125	0.7354	1.7639	1.5227
ENSG00000089682	RBM41	chrX:106307649-106362057	protein_coding	6105	7.5816	7.9358	8.5077	10.4471	5.9614	6.0129	6.5694	6.0231	5.6067	4.7265	5.178	4.0568	5.2412	3.4002	5.9765	5.6375	2.3335	3.2989	4.0725	3.8904
ENSG00000089685	BIRC5	chr17:76210266-76221717	protein_coding	3815	25.6962	22.1545	35.2512	33.6466	26.378	26.08	38.2768	33.6816	21.0736	18.2554	19.5565	19.3235	5.4507	2.7361	1.4916	3.1022	0.0284	0.3788	4.1961	4.4164
ENSG00000089692	LAG3	chr12:6881677-6887621	protein_coding	3056	0.4427	0.4939	0.2893	0.4937	0.4783	0.3683	0.6241	0.365	0.6104	0.535	0.2398	0.2906	0.2875	0.1158	0.1424	0.1139	0	0.0153	0.0096	0.0601
ENSG00000089693	MLF2	chr12:6857169-6876641	protein_coding	3773	24.3176	20.6811	18.9066	19.6181	20.5897	21.315	17.778	16.9387	21.0115	17.2237	13.4807	18.3253	16.3402	17.7716	11.7465	11.6706	13.8683	13.7153	17.8417	18.0084
ENSG00000089723	OTUB2	chr14:94492674-94515276	protein_coding	4252	2.0453	2.1061	1.8715	1.9401	1.0828	1.0736	1.2193	0.9777	1.7109	1.9417	1.9535	1.3658	1.3948	0.3051	0.6377	0.5219	0.1656	0.8113	0.4137	0.4197
ENSG00000089737	DDX24	chr14:94517265-94547591	protein_coding	6007	22.3116	18.1991	26.7656	23.8481	17.9082	18.916	23.1869	21.0477	27.3728	27.8008	29.4197	35.446	26.8406	32.466	42.6964	33.0661	15.113	19.115	26.3956	27.0434
ENSG00000089775	ZBTB25	chr14:64915823-64971931	protein_coding	12229	2.6392	2.3655	3.3166	3.0736	3.6812	4.5103	5.6717	4.7839	2.7075	2.7005	3.7996	2.0392	2.0357	0.8536	1.5767	1.8359	0.7486	0.6633	1.2755	1.2061
ENSG00000089818	NECAP1	chr12:8234806-8250367	protein_coding	4155	5.6978	4.5163	6.9333	6.6128	5.1886	5.2527	7.2087	7.5158	5.9708	6.2954	8.1844	8.7231	7.2427	7.9198	10.6665	9.2363	5.1234	4.3646	8.8063	8.4953
ENSG00000089820	ARHGAP4	chrX:153172820-153200452	protein_coding	5580	3.0478	3.5703	1.8862	2.5138	1.493	1.7819	1.7042	2.2349	1.4374	1.5968	1.2434	0.8203	1.1941	0.6341	0.8338	1.2632	0.1553	0.1755	0.1997	0.2399
ENSG00000089847	ANKRD24	chr19:4183350-4224811	protein_coding	4474	3.3585	4.2056	2.6521	3.25	0.2123	0.2097	0.3362	0.3777	0.1876	0.3106	0.1857	0.0993	0.5401	0.2504	0.8903	0.7294	0.1453	0.2501	0.0983	0.1115
ENSG00000089876	DHX32	chr10:127524905-127585005	protein_coding	3948	5.9721	5.0462	9.4641	8.3011	6.7194	6.7003	8.5732	8.6204	10.5125	9.814	11.6827	11.3783	7.3443	7.633	9.4792	10.8667	5.8036	6.8135	11.7856	11.3405
ENSG00000089902	RCOR1	chr14:103058997-103196913	protein_coding	6202	9.3872	7.5683	9.2024	8.8915	8.2602	8.2582	8.1039	7.4983	13.1433	13.4304	15.6772	11.5779	7.9808	6.1997	8.1985	7.6962	3.4411	9.7043	6.3725	6.1865
ENSG00000089916	GPATCH2L	chr14:76618258-76720685	protein_coding	21987	5.298	4.9081	5.8168	6.4731	4.9857	4.9461	5.8693	5.6197	5.6969	5.7774	6.3244	5.2437	5.5314	4.8306	6.1278	5.6954	3.0943	3.4561	4.5298	4.3829
ENSG00000090006	LTBP4	chr19:41098788-41135725	protein_coding	8109	5.7735	7.0479	2.2195	2.9213	5.5696	5.3135	3.1736	3.2509	23.5898	22.9935	12.5869	8.2063	8.5961	1.4181	2.7988	3.9599	0.0868	1.305	0.5387	0.6246
ENSG00000090013	BLVRB	chr19:40953695-40971747	protein_coding	1665	6.6161	8.2791	11.7687	13.4178	11.0609	10.7795	16.8921	14.4524	5.3775	6.235	9.1556	5.2113	5.585	2.1606	7.4789	6.7684	5.4655	5.544	12.3792	11.7428
ENSG00000090020	SLC9A1	chr1:27425305-27493472	protein_coding	5974	2.313	1.8274	0.7782	1.3648	1.9451	1.6226	0.9893	0.7411	1.6549	1.2315	0.7933	0.629	1.2992	0.8095	0.5939	0.6409	1.4689	0.6711	0.6871	0.7864
ENSG00000090054	SPTLC1	chr9:94794280-94877666	protein_coding	3658	10.7249	10.1361	17.0137	16.6284	11.5275	10.7874	16.7066	16.0484	9.7142	9.363	11.754	13.1675	7.246	6.6099	9.1692	9.3136	4.2943	4.9959	12.0307	11.314
ENSG00000090060	PAPOLA	chr14:96967769-97033448	protein_coding	12766	17.4549	12.9024	17.1613	16.5597	14.054	13.8093	14.01	14.1504	14.2245	11.5128	12.3009	12.6678	9.7046	7.516	10.2105	9.8161	4.3152	6.1388	9.0879	8.2601
ENSG00000090061	CCNK	chr14:99947505-100001381	protein_coding	8220	3.415	3.2438	1.27	1.7299	2.9072	3.4083	1.5033	1.4473	3.2223	3.938	1.908	1.9366	3.0998	2.3532	2.3497	1.8315	1.3179	1.1627	0.9202	0.9897
ENSG00000090097	PCBP4	chr3:51991469-52002426	protein_coding	3686	3.6177	3.8762	4.7512	4.1277	22.3049	19.7992	18.2632	15.899	23.4052	30.1599	32.5419	34.2998	29.7967	43.5497	32.1026	32.8635	10.5659	10.2573	22.9877	25.9591
ENSG00000090104	RGS1	chr1:192544856-192549161	protein_coding	4117	0	0	0.0069	0	0	0.0152	0	0.0082	0	0	0.0119	0.0332	0.0534	0.0143	0.0081	0.0211	0	0	0	0.0127
ENSG00000090238	YPEL3	chr16:30103634-30108236	protein_coding	3181	1.9441	2.8784	1.7664	1.6549	1.1257	0.7077	0.6925	0.51	2.1697	1.7988	1.3977	0.537	4.5346	3.3927	7.3767	5.485	5.5171	2.4182	2.3227	2.1616
ENSG00000090263	MRPS33	chr7:140705853-140715028	protein_coding	1818	8.6372	7.1119	17.399	16.2082	7.3161	6.8109	15.7364	16.006	8.67	8.8577	14.6739	13.6418	6.4843	8.1745	11.0291	12.9959	6.9422	9.7701	17.2238	16.2689
ENSG00000090266	NDUFB2	chr7:140390576-140422590	protein_coding	4447	5.9755	5.2832	11.6091	11.3612	3.2703	3.361	5.6118	5.9279	3.9639	4.6873	5.4496	9.7789	3.1448	5.1984	3.8013	5.0194	6.8333	8.4182	12.1444	13.2311
ENSG00000090273	NUDC	chr1:27226728-27273353	protein_coding	2856	29.8247	17.8971	29.2315	26.9398	18.7564	15.3932	21.7931	20.7798	18.6467	13.5092	15.7561	29.7711	9.9986	9.3745	10.9587	11.868	7.0933	9.3207	17.0721	16.2371
ENSG00000090316	MAEA	chr4:1283638-1333935	protein_coding	9857	5.48	4.0117	4.5951	3.7612	3.0843	2.8042	2.7988	2.9795	4.343	4.1215	2.87	4.436	3.053	3.2367	2.0512	2.2866	1.8244	2.133	2.8436	2.8275
ENSG00000090339	ICAM1	chr19:10381510-10397291	protein_coding	3706	0.4954	0.9774	0.6311	1.0913	1.124	0.8775	1.6237	1.4774	0.0503	0.0441	0.1055	0.083	0.3951	0.0318	0.1716	0.0117	1.2424	8.0383	6.5901	6.515
ENSG00000090372	STRN4	chr19:47222763-47250251	protein_coding	7641	14.5052	15.6439	9.8882	10.9684	11.6876	10.8033	8.3707	8.2579	11.2784	11.8211	7.9226	7.6762	10.0617	10.4115	5.717	5.814	3.7855	4.2099	4.9729	5.6362
ENSG00000090376	IRAK3	chr12:66582658-66648402	protein_coding	10004	0.198	0.1358	0.2452	0.1861	0.0511	0.0625	0.0591	0.0236	0.1398	0.1144	0.0879	0.0376	0.0439	0.0059	0.0201	0.0217	0	0.0093	0	0.0105
ENSG00000090382	LYZ	chr12:69742120-69748014	protein_coding	1764	0	0	0	0.0364	0.0414	0.0355	0.0609	0	0.1057	0.0463	0.0277	0.0387	0.083	0.0334	0.019	0.0247	0.0921	0.0529	0.0665	0.0595
ENSG00000090402	SI	chr3:164696685-164796283	protein_coding	6138	0	0	0	0	0	0	0	0	0	0	0	0	0	0	0	0	0	0	0	0
ENSG00000090432	MUL1	chr1:20825942-20834654	protein_coding	2436	6.5451	5.5555	7.5053	7.2472	6.1201	5.1857	7.3001	6.6456	6.6619	6.7783	7.2206	9.2414	6.3121	7.8921	7.3654	6.073	7.0488	7.2915	10.086	9.2651
ENSG00000090447	TFAP4	chr16:4307186-4323076	protein_coding	7867	3.4884	3.0376	3.0963	2.6276	3.3164	2.7584	2.7488	2.6292	4.3391	3.2107	3.3475	2.7704	1.2286	0.5097	0.6468	0.7798	0.2548	0.397	0.3242	0.427
ENSG00000090470	PDCD7	chr15:65409716-65426174	protein_coding	3263	8.9434	7.5395	9.7464	9.5715	9.6978	10.9434	12.1842	12.6362	9.6039	8.6928	9.5083	8.7417	6.9338	5.2051	9.9817	10.8944	2.1248	2.7003	4.286	4.5764
ENSG00000090487	SPG21	chr15:65255361-65282648	protein_coding	3984	9.144	7.8166	12.5215	12.3995	10.9511	9.1513	12.9122	13.5815	17.1831	19.6559	25.1042	24.1886	13.7288	29.22	18.6946	23.6449	5.7511	9.3614	15.7635	14.5317
ENSG00000090512	FETUB	chr3:186353757-186370930	protein_coding	2024	0.0477	0	0.0141	0	0	0	0	0	0	0	0	0.0338	0	0	0	0	0	0.0461	0	0.013
ENSG00000090520	DNAJB11	chr3:186285191-186315061	protein_coding	6040	8.2471	5.8139	9.9073	8.843	6.1223	6.5953	8.0677	8.8073	9.1105	8.4043	6.5766	16.3621	7.0917	10.1054	15.0688	12.6499	8.0891	6.8849	21.5622	20.8431
ENSG00000090530	LEPREL1	chr3:189674516-189840226	protein_coding	5605	3.8014	4.3084	7.338	5.0739	1.7993	1.4393	1.6583	1.6039	2.2297	3.6314	3.2079	2.9742	4.1934	3.3248	2.5202	5.698	2.8702	3.1856	2.4585	2.594
ENSG00000090534	THPO	chr3:184089722-184095932	protein_coding	1915	0.3532	0.1839	0.1192	0.2179	1.1067	0.9144	0.7014	0.7236	0.2922	0.3415	0.4082	0.2141	0.9559	1.2934	0.839	1.0225	0.0849	0.1461	0.2297	0.2056
ENSG00000090539	CHRD	chr3:184097860-184108524	protein_coding	6620	0.2408	0.3344	0.2714	0.2909	1.689	1.8704	1.8179	1.8532	0.4086	0.7532	0.8561	0.7379	2.3448	2.9397	3.6862	3.845	1.6283	2.0915	2.7459	2.9653
ENSG00000090554	FLT3LG	chr19:49977463-49989488	protein_coding	2902	0.0666	0.1214	0.1278	0.1327	0.1007	0.1939	0.287	0.2096	0.0964	0.1127	0	0.0706	0.1009	0	0.0231	0.09	0	0	0.1718	0.1628
ENSG00000090565	RAB11FIP3	chr16:475618-573011	protein_coding	6317	5.9199	6.889	5.8878	6.3973	4.3036	4.0985	3.7464	4.0286	5.8467	5.396	4.6949	5.159	4.7871	3.0247	2.7979	3.2236	5.222	3.4391	3.9266	4.5783
ENSG00000090581	GNPTG	chr16:1401923-1413352	protein_coding	3672	3.2236	3.6718	3.6818	3.5665	4.3586	4.0873	4.3893	4.2062	3.6829	3.495	2.9539	3.1351	3.4895	2.5054	1.7959	2.0736	5.4727	3.3136	5.2219	5.7677
ENSG00000090612	ZNF268	chr12:133707569-133783698	protein_coding	6905	5.5697	5.0491	11.5288	9.6226	6.0856	5.6604	8.6443	8.5654	7.2803	5.9309	8.2293	9.3058	4.5491	4.5351	4.9156	5.5263	1.6944	1.9242	3.8894	3.8767
ENSG00000090615	GOLGA3	chr12:133345494-133405444	protein_coding	10550	6.8694	6.719	6.329	7.7067	5.0914	5.2578	6.2714	6.1923	11.1831	11.4129	9.7765	11.2164	12.555	10.8052	23.1113	17.7838	11.6805	12.5011	17.7416	16.918
ENSG00000090621	PABPC4	chr1:40026487-40042462	protein_coding	6782	19.8261	18.7825	21.5622	21.0851	24.6979	24.2141	25.52	26.8201	26.1426	22.2736	21.9009	27.1644	18.6884	19.5997	32.6793	27.3436	9.9356	18.7317	18.3731	19.058
ENSG00000090659	CD209	chr19:7804878-7812464	protein_coding	4428	0.0109	0	0.0129	0	0	0	0	0	0	0	0	0	0.0496	0	0.0227	0.0295	0	0	0	0
ENSG00000090661	CERS4	chr19:8271619-8327305	protein_coding	4059	7.4395	9.6305	8.2075	9.9324	6.3196	6.702	7.3461	6.9775	3.9981	4.0277	4.3695	3.1392	3.9145	2.005	2.8204	2.7978	0.6406	1.7917	1.4808	1.4289
ENSG00000090674	MCOLN1	chr19:7587511-7598895	protein_coding	3956	1.0992	1.1827	1.4348	1.4767	0.8867	1.0275	0.8692	0.9141	1.1788	1.3431	0.7534	1.6666	0.7774	0.8348	0.4908	0.396	1.3555	1.2845	1.3044	1.3334
ENSG00000090686	USP48	chr1:22004790-22110099	protein_coding	9497	8.6282	7.9355	11.791	12.1134	5.2866	4.8267	6.7546	6.6867	7.6208	7.5571	10.2791	8.2911	6.6305	5.0608	10.4895	9.8916	2.2586	3.9418	6.869	6.4277
ENSG00000090776	EFNB1	chrX:68048839-68061990	protein_coding	3314	9.6222	7.9851	7.548	6.4701	5.7115	6.2649	4.4339	3.5796	23.3025	24.4191	20.1099	15.5548	15.466	5.1962	6.8887	8.1271	2.1412	6.0209	6.945	7.4994
ENSG00000090857	PDPR	chr16:70147528-70195203	protein_coding	9148	7.9486	7.4848	5.6434	6.7334	5.0808	5.2091	4.2491	4.5811	7.8606	7.0859	5.9018	5.1196	5.0665	3.6745	3.8824	4.1999	2.2441	3.2615	2.9838	2.9118
ENSG00000090861	AARS	chr16:70286197-70323446	protein_coding	4498	47.649	37.1895	47.9708	51.9585	47.4423	28.9463	32.608	34.2926	18.1639	17.3553	15.9026	27.4547	25.1014	24.5698	30.6981	31.7191	10.4769	14.9249	31.4637	29.9781
ENSG00000090863	GLG1	chr16:74485855-74641012	protein_coding	9550	23.6465	24.1379	24.0425	26.5594	18.9933	21.151	23.6871	22.5217	19.5029	19.019	22.5315	18.6436	18.8916	11.6093	21.3742	19.7053	14.9568	13.1999	25.3557	25.0595
ENSG00000090889	KIF4A	chrX:69509878-69640682	protein_coding	4723	15.8561	13.5387	20.4422	19.8313	13.6011	13.7175	17.791	14.3116	12.0853	9.8132	10.2932	10.5093	3.7517	1.0988	0.7229	1.4187	0.0229	0.4047	1.912	1.9837
ENSG00000090905	TNRC6A	chr16:24741015-24838953	protein_coding	12522	16.5564	18.9313	16.5322	20.2557	7.6512	7.7908	7.4054	7.2495	8.9527	9.6678	8.7207	7.1748	7.4729	4.248	6.1831	5.2955	2.0461	3.6597	4.7718	4.8833
ENSG00000090920	FCGBP	chr19:40353962-40440533	protein_coding	16564	0.0204	0.0334	0.0121	0.0291	0.0882	0.0604	0.0405	0.0347	0.152	0.2122	0.1386	0.0742	0.0575	0.0783	0.0829	0.1235	0.0556	0.0281	0.0018	0.0079
ENSG00000090924	PLEKHG2	chr19:39903224-39919054	protein_coding	9199	5.8404	5.5018	2.9673	3.2556	4.6316	4.5412	2.2164	2.2374	10.3719	11.0631	5.2158	5.0021	6.1448	4.0003	2.2743	2.3461	1.4897	2.5846	2.4446	2.579
ENSG00000090932	DLL3	chr19:39989534-39999121	protein_coding	2618	0.6275	0.6342	0.3159	0.4536	12.6454	11.3225	5.2946	3.8857	0.9263	0.9991	0.7838	1.1483	2.0696	0.3829	0.4603	0.2327	0.269	0.2493	0.2352	0.2205
ENSG00000090971	NAT14	chr19:55996370-55998935	protein_coding	2163	6.3437	6.3497	8.1229	8.5329	6.9263	8.7603	10.072	9.125	8.2788	8.4652	8.9225	9.1759	6.0594	4.2532	5.5248	6.3164	5.0586	5.4961	9.8002	10.6407
ENSG00000090975	PITPNM2	chr12:123468026-123634562	protein_coding	9165	0.912	0.752	0.4855	0.4343	0.5821	0.58	0.3605	0.2655	0.4376	0.3924	0.3465	0.205	0.5513	0.4697	0.3798	0.3133	0.526	0.2849	0.4287	0.3522
ENSG00000090989	EXOC1	chr4:56719781-56771200	protein_coding	5347	5.5932	5.6736	9.1056	8.7945	9.4033	10.2453	13.3786	12.4012	7.605	6.6959	9.2474	7.8199	7.4494	5.9227	9.4781	9.4476	4.6498	6.6612	10.2044	9.8703
ENSG00000091009	RBM27	chr5:145583112-145718814	protein_coding	6900	21.3146	16.1573	22.603	21.9572	12.3072	11.9997	14.6266	14.5032	12.5301	12.3443	12.7317	14.1049	10.3888	8.957	11.58	10.9976	4.1606	5.1552	9.0125	8.786
ENSG00000091010	POU4F3	chr5:145718586-145720083	protein_coding	1182	0.0409	0.0426	0.0241	0	0	0	0	0	0.0789	0	0.0413	0.0578	0.3097	0.0499	0.085	0	0	0	0	0
ENSG00000091039	OSBPL8	chr12:76745576-76953589	protein_coding	9198	16.2783	12.7223	23.6385	22.6239	15.2867	15.2635	22.1958	21.6456	14.7332	13.1527	20.1482	21.9791	11.7974	9.6108	17.5121	17.2143	10.2527	10.0355	23.0238	20.5717
ENSG00000091073	DTX2	chr7:76090992-76135312	protein_coding	5042	2.4627	2.5544	1.0296	1.426	1.3915	0.9922	0.6766	0.7507	1.0729	1.0862	0.7074	0.6165	1.0892	0.4679	0.79	0.7767	0.4082	0.601	0.3547	0.458
ENSG00000091106	NLRC4	chr2:32449521-32490923	protein_coding	3624	0	0	0	0	0.0202	0	0.0148	0	0	0	0	0	0.0202	0.0163	0	0.06	0	0.0257	0	0
ENSG00000091127	PUS7	chr7:105080107-105162714	protein_coding	4421	14.983	10.8675	18.4322	16.0601	12.1167	12.0801	13.9813	13.8367	11.0966	9.5221	9.7033	12.8808	3.6602	4.6554	2.8015	3.9564	2.2054	3.2373	6.1676	5.9421
ENSG00000091128	LAMB4	chr7:107663992-107770801	protein_coding	7016	0	0	0	0	0	0	0	0.0048	0	0	0	0.0146	0.0104	0.0084	0	0	0.0077	0.0066	0.0125	0.0112
ENSG00000091129	NRCAM	chr7:107788067-108097161	protein_coding	7939	2.7203	2.3637	3.3771	2.8545	0.5523	0.5829	0.5685	0.6386	1.0573	1.8842	2.554	4.3545	3.0435	2.2953	0.9234	0.5645	1.9923	1.5738	0.8605	0.8793
ENSG00000091136	LAMB1	chr7:107564243-107643700	protein_coding	8140	25.119	27.3116	35.7617	40.6673	35.2565	34.5256	52.9929	51.3553	20.8073	22.1226	24.6637	30.7573	17.4686	2.9704	8.6481	9.2261	19.717	49.2713	75.5924	73.4282
ENSG00000091137	SLC26A4	chr7:107301079-107358254	protein_coding	5800	0.0333	0.0173	0.0295	0.0111	0.0378	0	0.0463	0.0583	0.0161	0	0.0084	0.0059	0.1389	0	0.0231	0.015	0.1121	0.0965	0.3387	0.1584
ENSG00000091138	SLC26A3	chr7:107405911-107443670	protein_coding	3382	0	0	0	0	0	0	0	0	0	0	0	0	0	0	0	0	0	0	0	0
ENSG00000091140	DLD	chr7:107531414-107572175	protein_coding	5299	13.2481	10.9087	26.5094	26.7013	11.5296	10.0431	20.6629	19.6823	10.7013	9.3019	15.4535	19.3335	8.1525	9.6266	13.7585	13.532	6.8181	11.27	18.9781	17.141
ENSG00000091157	WDR7	chr18:54318573-54698828	protein_coding	10685	2.799	2.2129	3.0004	2.8419	2.175	1.9548	1.9308	2.2616	3.9105	4.0317	3.617	3.8237	3.4674	3.3722	3.7468	3.9011	1.9517	2.343	2.6754	2.5446
ENSG00000091164	TXNL1	chr18:54264438-54318831	protein_coding	11298	4.7853	3.3263	6.9198	5.9322	4.6379	4.4503	6.5956	6.4105	5.7373	5.3323	7.9227	6.8062	5.0421	5.4807	8.0115	8.4611	3.2026	3.6518	5.9427	5.777
ENSG00000091181	IL5RA	chr3:3111232-3168297	protein_coding	3377	0	0	0	0	0	0.037	0.008	0.03	0.0276	0	0.0145	0.0202	0.0434	0.0349	0	0	0	0	0	0
ENSG00000091262	ABCC6	chr16:16242784-16317379	protein_coding	7559	0.1214	0.193	0.1547	0.1231	0.6671	0.6784	0.5757	0.4382	0.3702	0.4434	0.2909	0.0859	0.3003	0.0936	0.2613	0.2763	0.1362	0.2035	0.1629	0.2083
ENSG00000091317	CMTM6	chr3:32522803-32544900	protein_coding	4413	16.2911	13.9539	26.2862	25.2177	10.7145	11.3226	15.6076	17.3158	11.3069	10.1877	12.7435	17.6803	7.7153	7.537	8.6017	8.223	7.0823	7.2047	19.5063	18.6913
ENSG00000091409	ITGA6	chr2:173292081-173371181	protein_coding	6704	44.6539	38.4223	56.1941	57.0342	1.537	1.5765	1.9955	2.692	3.5197	3.9871	6.224	6.6752	16.503	19.5726	24.3115	27.3567	32.408	80.6038	108.932	102.494
ENSG00000091428	RAPGEF4	chr2:173600001-173917621	protein_coding	7161	0.3711	0.267	0.4142	0.3586	0.1633	0.2882	0.1763	0.1463	0.4949	0.605	0.6755	0.3482	0.6851	0.2388	0.5376	0.4193	1.9289	0.1953	1.5108	1.4366
ENSG00000091436	MLTK	chr2:173940162-174132738	protein_coding	13799	2.6365	2.1802	3.3713	3.2054	2.8917	2.7554	3.4574	3.4779	4.6096	5.0767	6.2955	5.7904	3.465	2.9617	3.6363	4.3136	4.7183	3.8954	7.9763	7.7159
ENSG00000091482	SMPX	chrX:21724089-21776281	protein_coding	1040	0	0.0484	0.0549	0.0926	0	0	0	0	42.0596	38.8276	65.7721	113.256	143.132	331.212	356.884	369.007	88.2815	205.575	184.063	171.721
ENSG00000091483	FH	chr1:241660902-241683061	protein_coding	2142	26.8417	22.1953	35.8728	33.4622	33.7427	31.2097	42.9654	39.7766	32.4386	29.27	33.6221	37.2547	20.0655	25.6045	30.0046	26.2448	15.9567	24.4851	26.349	26.8198
ENSG00000091490	SEL1L3	chr4:25749054-25865382	protein_coding	7483	14.3596	12.4513	17.1486	16.3173	0.2344	0.1922	0.2728	0.3162	1.4458	2.1629	2.1025	3.4421	2.3288	3.8459	1.5791	2.1805	2.5842	2.8721	5.1837	5.2186
ENSG00000091513	TF	chr3:133464799-133497850	protein_coding	8565	0.0169	0.0411	0.0167	0.0337	0.0683	0.1095	0.1035	0.2486	0.1633	0.1241	0.3137	0.0558	0.4445	0.0895	0.4299	0.5283	0.0253	0.0544	0.0205	0.0613
ENSG00000091527	CDV3	chr3:133292573-133309105	protein_coding	4367	36.7424	29.3538	49.4425	47.5781	44.9161	42.8174	61.7591	61.2783	45.3624	44.3621	59.1189	69.5575	46.075	64.334	85.0224	84.9995	67.7612	92.3531	186.402	180.709
ENSG00000091536	MYO15A	chr17:18012019-18083116	protein_coding	19117	0.1365	0.1237	0.1074	0.1142	0.0956	0.0785	0.0759	0.0371	0.2342	0.1326	0.1022	0.0643	0.2949	0.1203	0.3274	0.3004	0.0113	0.1024	0.0521	0.0357
ENSG00000091542	ALKBH5	chr17:18086391-18113268	protein_coding	3190	21.9311	21.4169	28.755	25.3266	25.4064	29.1313	31.1995	25.3211	22.9804	25.9064	27.3398	28.3352	26.8781	23.774	43.2433	34.6724	29.7663	15.9734	30.174	31.1966
ENSG00000091583	APOH	chr17:64208150-64252643	protein_coding	1332	0	0	0	0.0723	0	0	0	0	0	0	0	0	0.055	0	0	0	0	0	0	0.0197
ENSG00000091592	NLRP1	chr17:5402746-5522744	protein_coding	12811	0.5619	0.5105	0.6946	0.4685	0.8728	0.9421	0.8912	0.8336	2.5699	2.5714	1.865	1.7466	3.7265	0.8148	1.168	1.3484	1.6574	1.1718	1.4739	1.4196
ENSG00000091622	PITPNM3	chr17:6354583-6459814	protein_coding	10609	0.97	0.6971	0.57	0.6687	0.2549	0.277	0.2583	0.2326	0.7648	1.1249	0.9303	0.4894	1.3665	2.1457	1.6944	2.1901	0.6229	0.2065	0.6384	0.7248
ENSG00000091640	SPAG7	chr17:4862520-4871167	protein_coding	2831	16.0083	15.8694	25.238	27.9827	14.4045	14.4246	23.0103	21.202	13.6062	14.1194	21.1073	18.8602	12.5181	15.7275	15.7378	17.2138	11.7479	11.7578	22.2147	22.471
ENSG00000091651	ORC6	chr16:46723554-46732306	protein_coding	4309	13.8924	11.1734	19.3746	17.3715	11.6515	11.8426	14.6377	14.8866	10.5193	9.0298	11.9058	13.1839	3.7213	1.8202	2.7189	3.0899	0.5028	0.6383	1.878	2.0099
ENSG00000091656	ZFHX4	chr8:77593453-77779521	protein_coding	15696	0.8557	0.6987	0.2326	0.5746	1.2385	1.4901	0.8437	0.9388	22.2173	27.6016	12.6444	8.3313	17.8899	7.6835	4.6875	5.1284	1.1871	4.3335	1.6755	2.0482
ENSG00000091664	SLC17A6	chr11:22359642-22401049	protein_coding	4219	0	0.0358	0.0135	0.0456	0	0	0	0	0.0884	0.1356	0.1506	0.5263	1.7181	0.2656	0.3888	0.2269	0	0	0	0.0062
ENSG00000091704	CPA1	chr7:130020179-130027955	protein_coding	2921	0	0	0	0	5.9545	7.4504	12.1853	12.2645	0.1277	0.056	0.1171	0.0117	0.0501	0.1413	0.1604	0.2979	0.0927	0.0958	0.1506	0.1438
ENSG00000091732	ZC3HC1	chr7:129658125-129691291	protein_coding	3011	7.9108	6.4996	11.1021	10.4898	6.0678	6.6877	10.4828	10.0571	7.1243	7.3842	8.8112	10.8802	5.6903	8.7157	8.0822	8.9739	2.8424	4.3043	7.3322	7.243
ENSG00000091831	ESR1	chr6:151977825-152450754	protein_coding	13629	0	0.0074	0.0042	0.0047	0	0	0	0	0	0.024	0.0143	0.0075	0.0215	0.0173	0.0074	0.0096	0.1272	0.0034	0.028	0.0135
ENSG00000091844	RGS17	chr6:153325593-153452384	protein_coding	7899	1.7249	1.2738	2.0654	2.1456	0.5644	0.5779	0.6053	0.8942	0.4959	0.3312	0.3588	0.3935	0.6674	0.0523	0.1144	0.1157	0.0206	0.419	0.4751	0.4186
ENSG00000091879	ANGPT2	chr8:6357171-6420930	protein_coding	6784	0.0427	0.0222	0.0126	0.0047	0.0862	0.083	0.0832	0.1644	0.0412	0.0723	0.0936	0.0352	0.2159	0.0087	0.0247	0.0064	0	0.11	0.0086	0.0271
ENSG00000091947	TMEM101	chr17:42088555-42101314	protein_coding	3029	3.7325	5.2319	8.1923	9.7069	6.2489	7.6803	16.4422	14.7617	5.019	6.018	13.0818	7.9509	6.4301	4.6921	13.0846	13.0433	2.5215	2.3702	5.7883	6.3076
ENSG00000091972	CD200	chr3:112051193-112081659	protein_coding	2991	8.9652	6.8795	12.807	13.1678	2.3945	2.7181	3.5386	3.1865	2.2763	1.4211	2.238	3.0152	3.6476	0.6507	0.7834	0.4364	0.3984	0.1247	1.3233	1.4653
ENSG00000091986	CCDC80	chr3:112323406-112368377	protein_coding	5305	1.4117	0.5121	0.8602	0.9439	5.3588	4.7624	5.0232	4.778	13.5021	13.2051	16.182	10.5605	17.2941	0.8337	1.161	1.058	48.1222	18.5951	90.7929	86.7015
ENSG00000092009	CMA1	chr14:24974558-24977471	protein_coding	937	0	0	0	0	0	0	0	0	0	0	0	0.0365	0	0	0	0	0	0	0	0
ENSG00000092010	PSME1	chr14:24605366-24608176	protein_coding	1781	14.1337	17.2029	30.4283	31.2154	5.4164	8.6729	14.359	15.7883	21.9943	23.7746	34.6761	30.0369	17.8426	19.8011	29.6773	30.3673	13.7774	15.7842	50.539	50.0123
ENSG00000092020	PPP2R3C	chr14:35554672-35591723	protein_coding	3863	6.091	4.7535	11.8136	10.3948	5.4863	5.0832	9.0957	9.1075	6.2049	5.7979	9.3342	9.9042	4.0752	3.6944	7.0535	7.1298	3.3092	4.2722	10.1323	9.4568
ENSG00000092036	HAUS4	chr14:23415436-23426370	protein_coding	2539	8.8866	10.6603	17.2887	16.005	14.7082	14.9998	24.7785	22.4424	6.6488	5.5053	10.9496	7.0501	4.4123	1.3936	5.089	5.7752	0.768	1.3771	3.0601	2.7701
[truncated: 55,803 more rows]

## Sheet: TF Top50 in OCT4 GOTERM_BP_ALL
Category	Term	Count	%	PValue	Genes	List Total	Pop Hits	Pop Total	Fold Enrichment	Bonferroni	Benjamini	FDR
[truncated: 453 more rows]

[truncated: 4 more sheets: TF Top50 in MSGN1 GOTERM_BP_ALL, TF Top50 in PAX7 GOTERM_BP_ALL, TF Top50 in MYOG GOTERM_BP_ALL, TF Top50 in TUBE GOTERM_BP_ALL]
