# Supplementary material for: Transcriptional landscape of myogenesis from human pluripotent stem cells reveals a key role of TWIST1 in maintenance of skeletal muscle progenitors
Source: eLife. 2020 Feb 3;9:e46981. doi: 10.7554/eLife.46981 (PMC6996923; doi:10.7554/eLife.46981)
Supplement: Supplementary file 2. [file elife-46981-supp2.xlsx]

## Sheet: PAX7 Up & MYOG Up Vs OCT4
Column ID	p-value(Attribute)	p-value(MYOG vs. OCT4)	Ratio(MYOG vs. OCT4)	Fold-Change(MYOG vs. OCT4)	Fold-Change(MYOG vs. OCT4) (Description)	Fold Change(MYOG vs. OCT4) 95% lower limit	Fold Change(MYOG vs. OCT4) 95% upper limit	T(MYOG vs. OCT4)	F(Attribute)	SS(Attribute)	SS(Error)	F(Error)	Column #	p-value(Attribute)	p-value(PAX7 vs. OCT4)	Ratio(PAX7 vs. OCT4)	Fold-Change(PAX7 vs. OCT4)	Fold-Change(PAX7 vs. OCT4) (Description)	Fold Change(PAX7 vs. OCT4) 95% lower limit	Fold Change(PAX7 vs. OCT4) 95% upper limit	T(PAX7 vs. OCT4)	F(Attribute)	SS(Attribute)	SS(Error)	F(Error)
ENSG00000003096	1.05226e-06	4.88632e-07	49990.8	49990.8	MYOG up vs OCT4	3182.86	785167	8.37361	27.0408	751.718	104.248	1	36	1.05226e-06	0.00758685	53.6581	53.6581	PAX7 up vs OCT4	3.41636	842.767	3.08228	27.0408	751.718	104.248	1
ENSG00000004866	1.23565e-09	1.78218e-06	4.92313	4.92313	MYOG up vs OCT4	3.1366	7.72722	7.53632	72.6577	54.1189	2.79317	1	69	1.23565e-09	8.35074e-10	17.4457	17.4457	PAX7 up vs OCT4	11.1149	27.3824	13.5181	72.6577	54.1189	2.79317	1
ENSG00000005102	3.22006e-06	1.1247e-06	7.18406	7.18406	MYOG up vs OCT4	4.19938	12.2901	7.82772	22.7046	23.9903	3.96236	1	83	3.22006e-06	0.000887853	2.83132	2.83132	PAX7 up vs OCT4	1.65502	4.84367	4.13144	22.7046	23.9903	3.96236	1
ENSG00000005513	9.17524e-07	1.27104e-06	6172190	6172190	MYOG up vs OCT4	83714.6	455069000	7.74962	27.6177	1871.95	254.177	1	105	9.17524e-07	1.94574e-05	232396	232396	PAX7 up vs OCT4	3152.03	17134300	6.12423	27.6177	1871.95	254.177	1
ENSG00000005882	4.76915e-05	0.000163568	3.79145	3.79145	MYOG up vs OCT4	2.14408	6.70454	4.98334	14.557	17.3367	4.46607	1	111	4.76915e-05	0.000286586	3.51165	3.51165	PAX7 up vs OCT4	1.98586	6.20977	4.69669	14.557	17.3367	4.46607	1
ENSG00000006607	7.31894e-06	0.000869426	2.17818	2.17818	MYOG up vs OCT4	1.45917	3.2515	4.1418	19.9075	11.7108	2.20597	1	150	7.31894e-06	8.14086e-06	3.47094	3.47094	PAX7 up vs OCT4	2.32518	5.18127	6.62071	19.9075	11.7108	2.20597	1
ENSG00000006704	1.44452e-06	7.68458e-05	19.1484	19.1484	MYOG up vs OCT4	5.94246	61.7018	5.37777	25.7463	129.195	18.8175	1	158	1.44452e-06	0.000951154	9.48173	9.48173	PAX7 up vs OCT4	2.94254	30.553	4.09745	25.7463	129.195	18.8175	1
ENSG00000007866	2.99202e-08	3.07511e-05	103.574	103.574	MYOG up vs OCT4	19.2135	558.339	5.87089	46.044	478.955	39.0079	1	197	2.99202e-08	5.1632e-07	727.271	727.271	PAX7 up vs OCT4	134.912	3920.5	8.33677	46.044	478.955	39.0079	1
ENSG00000009413	3.18337e-08	4.52122e-08	47.4036	47.4036	MYOG up vs OCT4	20.9567	107.226	10.0763	45.6302	111.423	9.15701	1	240	3.18337e-08	2.1882e-08	58.89	58.89	PAX7 up vs OCT4	26.0348	133.208	10.6428	45.6302	111.423	9.15701	1
ENSG00000010626	0.000754485	9.26774e-05	4.3325	4.3325	MYOG up vs OCT4	2.39689	7.8312	5.279	8.73646	11.2208	4.81638	1	274	0.000754485	0.00206839	2.80714	2.80714	PAX7 up vs OCT4	1.55301	5.07404	3.71641	8.73646	11.2208	4.81638	1
ENSG00000010803	4.18525e-05	0.00634512	6.70285	6.70285	MYOG up vs OCT4	1.86487	24.0918	3.16972	14.8883	89.3114	22.4953	1	277	4.18525e-05	0.000554737	13.7332	13.7332	PAX7 up vs OCT4	3.82087	49.3609	4.36476	14.8883	89.3114	22.4953	1
ENSG00000010810	0.00106841	0.00535302	27.0321	27.0321	MYOG up vs OCT4	3.11605	234.506	3.25275	8.14161	139.281	64.1523	1	278	0.00106841	0.000107443	194.864	194.864	PAX7 up vs OCT4	22.4624	1690.47	5.20151	8.14161	139.281	64.1523	1
ENSG00000011105	8.43584e-10	0.000165383	4611.67	4611.67	MYOG up vs OCT4	124.446	170898	4.97765	76.6712	3667.17	179.362	1	287	8.43584e-10	3.77456e-10	34003800000	34003800000	PAX7 up vs OCT4	917590000	1260100000000	14.3079	76.6712	3667.17	179.362	1
ENSG00000012171	5.59358e-09	0.00405847	2.92199	2.92199	MYOG up vs OCT4	1.4883	5.73675	3.38776	58.6387	97.8144	6.25532	1	319	5.59358e-09	1.16941e-09	65.121	65.121	PAX7 up vs OCT4	33.1691	127.852	13.1946	58.6387	97.8144	6.25532	1
ENSG00000012174	1.00465e-05	1.09765e-06	3.07663	3.07663	MYOG up vs OCT4	2.26693	4.17552	7.84333	18.9074	6.4636	1.28196	1	320	1.00465e-05	8.51829e-06	2.57251	2.57251	PAX7 up vs OCT4	1.89549	3.49134	6.5944	18.9074	6.4636	1.28196	1
ENSG00000012822	9.79235e-09	8.24111e-09	16308.9	16308.9	MYOG up vs OCT4	2678.43	99305	11.4443	54.1163	647.269	44.8526	1	328	9.79235e-09	0.000535021	41.0419	41.0419	PAX7 up vs OCT4	6.74034	249.904	4.38281	54.1163	647.269	44.8526	1
ENSG00000015153	2.48002e-05	5.02692e-06	7.86883	7.86883	MYOG up vs OCT4	4.16217	14.8765	6.90403	16.2748	24.1941	5.57475	1	362	2.48002e-05	1.92046e-05	6.24694	6.24694	PAX7 up vs OCT4	3.30428	11.8102	6.13154	16.2748	24.1941	5.57475	1
ENSG00000015171	2.24073e-05	0.0127243	30.948	30.948	MYOG up vs OCT4	2.32853	411.324	2.82783	16.5549	406.1	91.9892	1	363	2.24073e-05	3.46753e-05	1148.41	1148.41	PAX7 up vs OCT4	86.4066	15263.3	5.80521	16.5549	406.1	91.9892	1
ENSG00000018189	4.30835e-07	5.71765e-07	27.6652	27.6652	MYOG up vs OCT4	11.7557	65.1055	8.26888	30.997	83.2124	10.067	1	385	4.30835e-07	5.66941e-05	9.24693	9.24693	PAX7 up vs OCT4	3.92929	21.7611	5.53959	30.997	83.2124	10.067	1
ENSG00000023902	7.29218e-06	0.00167639	8.95458	8.95458	MYOG up vs OCT4	2.63457	30.4355	3.81913	19.9194	109.278	20.5726	1	445	7.29218e-06	1.94117e-05	33.6509	33.6509	PAX7 up vs OCT4	9.90062	114.375	6.12555	19.9194	109.278	20.5726	1
ENSG00000025039	4.82373e-06	9.1122e-07	291862	291862	MYOG up vs OCT4	10054.8	8471910	7.9633	21.2897	885.243	155.928	1	451	4.82373e-06	0.00399124	214.086	214.086	PAX7 up vs OCT4	7.37539	6214.32	3.3959	21.2897	885.243	155.928	1
ENSG00000026025	9.74448e-06	9.82559e-06	4.13059e+90	4.13059e+90	MYOG up vs OCT4	9.03312e+60	1.8888e+120	6.51188	19.002	324838	64106	1	461	9.74448e-06	1.86938e-05	3.41447e+85	3.41447e+85	PAX7 up vs OCT4	7.46706e+55	1.56134e+115	6.14662	19.002	324838	64106	1
ENSG00000030304	4.72037e-09	8.63291e-09	49587.9	49587.9	MYOG up vs OCT4	6574.74	374001	11.4051	60.0775	898.924	56.1103	1	493	4.72037e-09	0.00497069	22.5949	22.5949	PAX7 up vs OCT4	2.99581	170.415	3.28891	60.0775	898.924	56.1103	1
ENSG00000031003	0.00158584	0.0013066	8.78764	8.78764	MYOG up vs OCT4	2.71282	28.4658	3.94125	7.4981	37.9647	18.9872	1	496	0.00158584	0.000388446	12.2467	12.2467	PAX7 up vs OCT4	3.78067	39.6708	4.54316	7.4981	37.9647	18.9872	1
ENSG00000038382	1.46237e-06	7.74441e-05	85.9187	85.9187	MYOG up vs OCT4	14.6872	502.618	5.37367	25.6972	293.878	42.8857	1	561	1.46237e-06	4.22322e-07	1119.7	1119.7	PAX7 up vs OCT4	191.405	6550.17	8.47163	25.6972	293.878	42.8857	1
ENSG00000038532	4.90902e-08	1.53181e-08	7.2398	7.2398	MYOG up vs OCT4	4.92125	10.6507	10.9302	42.8323	23.3942	2.04817	1	563	4.90902e-08	0.000716379	2.15435	2.15435	PAX7 up vs OCT4	1.46441	3.16933	4.23763	42.8323	23.3942	2.04817	1
ENSG00000039319	3.59149e-05	0.00243605	51.5009	51.5009	MYOG up vs OCT4	5.11081	518.966	3.63656	15.2838	298.975	73.3558	1	568	3.59149e-05	0.00840009	26.7552	26.7552	PAX7 up vs OCT4	2.65512	269.608	3.03237	15.2838	298.975	73.3558	1
ENSG00000041982	0.000127211	0.000284795	1.37142e+26	1.37142e+26	MYOG up vs OCT4	192148000000000	9.78823e+37	4.69987	12.2429	33427.3	10238.8	1	589	0.000127211	0.000503277	3.4975e+24	3.4975e+24	PAX7 up vs OCT4	4900320000000	2.49627e+36	4.41335	12.2429	33427.3	10238.8	1
ENSG00000043039	1.58931e-08	0.00362581	2.37314	2.37314	MYOG up vs OCT4	1.3898	4.05225	3.44269	50.4684	52.9549	3.93476	1	604	1.58931e-08	6.71898e-09	18.475	18.475	PAX7 up vs OCT4	10.8196	31.5468	11.6178	50.4684	52.9549	3.93476	1
ENSG00000044524	9.54959e-08	1.41875e-07	54531.4	54531.4	MYOG up vs OCT4	4393.66	676810	9.22997	38.8365	902.927	87.1853	1	616	9.54959e-08	5.70962e-06	3193.67	3193.67	PAX7 up vs OCT4	257.318	39637.9	6.82856	38.8365	902.927	87.1853	1
ENSG00000047634	3.73162e-05	0.00142939	6.505	6.505	MYOG up vs OCT4	2.33597	18.1146	3.89719	15.1841	58.3716	14.416	1	638	3.73162e-05	5.79054e-06	26.4982	26.4982	PAX7 up vs OCT4	9.5156	73.7901	6.82025	15.1841	58.3716	14.416	1
ENSG00000047849	1.49394e-07	1.86309e-07	30100.5	30100.5	MYOG up vs OCT4	2643.5	342743	9.03626	36.3417	788.094	81.3212	1	642	1.49394e-07	0.00935525	29.9711	29.9711	PAX7 up vs OCT4	2.63213	341.269	2.97949	36.3417	788.094	81.3212	1
ENSG00000048405	8.90948e-09	1.87876e-09	34.8364	34.8364	MYOG up vs OCT4	19.2422	63.0684	12.7504	54.8559	70.833	4.84221	1	651	8.90948e-09	8.76631e-09	23.8658	23.8658	PAX7 up vs OCT4	13.1825	43.2071	11.3922	54.8559	70.833	4.84221	1
ENSG00000048471	8.8536e-08	2.06003e-08	3.36568	3.36568	MYOG up vs OCT4	2.64236	4.28701	10.691	39.2733	8.42694	0.804643	1	653	8.8536e-08	1.4048e-07	2.85358	2.85358	PAX7 up vs OCT4	2.24032	3.63473	9.23705	39.2733	8.42694	0.804643	1
ENSG00000048740	2.95138e-08	3.25964e-07	786643	786643	MYOG up vs OCT4	27707.1	22333900	8.64759	46.1357	1893.22	153.884	1	659	2.95138e-08	9.64945e-07	253504	253504	PAX7 up vs OCT4	8928.92	7197330	7.92625	46.1357	1893.22	153.884	1
ENSG00000049759	8.27117e-08	8.45733e-05	84.3388	84.3388	MYOG up vs OCT4	14.3023	497.336	5.32716	39.6698	457.787	43.2747	1	679	8.27117e-08	1.1042e-06	682.909	682.909	PAX7 up vs OCT4	115.809	4027.03	7.83951	39.6698	457.787	43.2747	1
ENSG00000053438	3.87591e-05	0.000299578	1.19038e+99	1.19038e+99	MYOG up vs OCT4	7.89126e+53	1.79565e+144	4.67423	15.0858	598347	148736	1	722	3.87591e-05	5.36636e-05	1.10082e+118	1.10082e+118	PAX7 up vs OCT4	7.2976e+72	1.66057e+163	5.56902	15.0858	598347	148736	1
ENSG00000053501	0.0202388	0.00954861	3.37807	3.37807	MYOG up vs OCT4	1.40991	8.09367	2.96943	4.04476	11.3184	10.4935	1	723	0.0202388	0.00807276	3.49417	3.49417	PAX7 up vs OCT4	1.45837	8.37184	3.05186	4.04476	11.3184	10.4935	1
ENSG00000054282	0.000174344	0.000313572	4.47806	4.47806	MYOG up vs OCT4	2.25278	8.90148	4.65113	11.5609	19.9999	6.48736	1	737	0.000174344	2.09255e-05	7.10594	7.10594	PAX7 up vs OCT4	3.57478	14.1252	6.08364	11.5609	19.9999	6.48736	1
ENSG00000054793	2.99169e-05	0.000140968	20.7035	20.7035	MYOG up vs OCT4	5.77696	74.197	5.06018	15.7668	94.15	22.3929	1	745	2.99169e-05	0.000964057	11.5859	11.5859	PAX7 up vs OCT4	3.23286	41.5216	4.09081	15.7668	94.15	22.3929	1
ENSG00000055118	6.29109e-07	2.5648e-07	151.227	151.227	MYOG up vs OCT4	44.9223	509.094	8.8127	29.2622	158.025	20.2511	1	754	6.29109e-07	4.59542e-05	25.0038	25.0038	PAX7 up vs OCT4	7.42742	84.1732	5.65243	29.2622	158.025	20.2511	1
ENSG00000056586	3.60751e-06	4.24052e-06	1716.35	1716.35	MYOG up vs OCT4	178.022	16547.6	7.00557	22.2991	419.676	70.5761	1	775	3.60751e-06	0.00400833	36.8968	36.8968	PAX7 up vs OCT4	3.827	355.73	3.39381	22.2991	419.676	70.5761	1
ENSG00000057704	1.34491e-06	8.31656e-07	26.5175	26.5175	MYOG up vs OCT4	11.1001	63.3487	8.02261	26.0335	72.3612	10.4233	1	789	1.34491e-06	5.97698e-05	9.50459	9.50459	PAX7 up vs OCT4	3.97859	22.7059	5.51135	26.0335	72.3612	10.4233	1
ENSG00000058063	1.16618e-05	7.26591e-05	38.2073	38.2073	MYOG up vs OCT4	9.08891	160.613	5.40744	18.451	139.444	28.3407	1	793	1.16618e-05	1.67717e-06	164.498	164.498	PAX7 up vs OCT4	39.1315	691.503	7.57437	18.451	139.444	28.3407	1
ENSG00000058091	1.7491e-09	3.20083e-07	25178.9	25178.9	MYOG up vs OCT4	2078.9	304957	8.66005	69.1773	1577.26	85.5009	1	795	1.7491e-09	6.12978e-09	879379	879379	PAX7 up vs OCT4	72606.2	10650700	11.6965	69.1773	1577.26	85.5009	1
ENSG00000058668	1.49525e-05	0.00362066	8846.86	8846.86	MYOG up vs OCT4	31.8958	2453830	3.44339	17.71	2054.02	434.929	1	802	1.49525e-05	9.06038e-06	32924300	32924300	PAX7 up vs OCT4	118703	9132140000	6.55867	17.71	2054.02	434.929	1
ENSG00000058673	8.99872e-06	2.79951e-05	4285.43	4285.43	MYOG up vs OCT4	211.285	86920.2	5.92247	19.2504	639.139	124.505	1	803	8.99872e-06	3.62059e-05	3512.73	3512.73	PAX7 up vs OCT4	173.188	71247.6	5.78166	19.2504	639.139	124.505	1
ENSG00000061337	5.57534e-08	2.29466e-08	156085	156085	MYOG up vs OCT4	14111.5	1726440	10.605	42.0404	890.046	79.392	1	839	5.57534e-08	9.55153e-05	377.93	377.93	PAX7 up vs OCT4	34.1682	4180.23	5.26316	42.0404	890.046	79.392	1
ENSG00000062370	0.000171426	0.00888241	3.38411	3.38411	MYOG up vs OCT4	1.4253	8.03495	3.00497	11.5967	31.7808	10.2769	1	853	0.000171426	5.58115e-05	9.49505	9.49505	PAX7 up vs OCT4	3.99906	22.5443	5.54799	11.5967	31.7808	10.2769	1
ENSG00000062725	0.000427561	0.000179328	163.036	163.036	MYOG up vs OCT4	18.0709	1470.92	4.93599	9.76752	173.216	66.5021	1	860	0.000427561	0.00020267	152.808	152.808	PAX7 up vs OCT4	16.9372	1378.64	4.8732	9.76752	173.216	66.5021	1
ENSG00000063660	8.67717e-10	5.02864e-08	180807000	180807000	MYOG up vs OCT4	3136060	10424300000	9.99519	76.3676	4601.13	225.937	1	877	8.67717e-10	6.66626e-06	368020	368020	PAX7 up vs OCT4	6383.23	21217900	6.73737	76.3676	4601.13	225.937	1
ENSG00000064309	2.93876e-08	0.00422853	3317.66	3317.66	MYOG up vs OCT4	19.6109	561264	3.36775	46.1645	4454.4	361.837	1	893	2.93876e-08	1.61915e-08	239826000000	239826000000	PAX7 up vs OCT4	1417630000	40572600000000	10.8851	46.1645	4454.4	361.837	1
ENSG00000064651	6.00127e-06	0.00229988	12.6201	12.6201	MYOG up vs OCT4	2.88837	55.1406	3.66462	20.5561	163.823	29.8859	1	903	6.00127e-06	1.08054e-05	87.1211	87.1211	PAX7 up vs OCT4	19.9395	380.656	6.45724	20.5561	163.823	29.8859	1
ENSG00000064655	9.0854e-08	0.00177325	12.151	12.151	MYOG up vs OCT4	2.98473	49.4672	3.79165	39.1236	282.619	27.089	1	905	9.0854e-08	7.61602e-08	588.837	588.837	PAX7 up vs OCT4	144.64	2397.19	9.68352	39.1236	282.619	27.089	1
ENSG00000065361	1.06678e-10	1.03563e-10	116994000000000	116994000000000	MYOG up vs OCT4	1431960000000	9558600000000000	15.6809	102.349	7272.49	266.46	1	937	1.06678e-10	6.40557e-05	81540.3	81540.3	PAX7 up vs OCT4	998.023	6661990	5.47441	102.349	7272.49	266.46	1
ENSG00000066136	4.06865e-05	0.000290739	4.43905	4.43905	MYOG up vs OCT4	2.25466	8.73975	4.6894	14.9608	25.1644	6.30761	1	975	4.06865e-05	0.00113571	3.57706	3.57706	PAX7 up vs OCT4	1.81684	7.04265	4.01012	14.9608	25.1644	6.30761	1
ENSG00000066382	1.20873e-10	0.00554921	5.13344	5.13344	MYOG up vs OCT4	1.7473	15.0817	3.23519	100.588	428.189	15.9632	1	984	1.20873e-10	6.93433e-11	3482.84	3482.84	PAX7 up vs OCT4	1185.48	10232.3	16.1299	100.588	428.189	15.9632	1
ENSG00000066739	0.000334415	0.000915351	3.26917	3.26917	MYOG up vs OCT4	1.77037	6.03687	4.11639	10.2379	14.1161	5.17053	1	997	0.000334415	0.00602328	2.50789	2.50789	PAX7 up vs OCT4	1.35811	4.63108	3.19516	10.2379	14.1161	5.17053	1
ENSG00000066933	0.0136312	0.012933	3.12082	3.12082	MYOG up vs OCT4	1.32024	7.37705	2.81978	4.51138	12.2371	10.1718	1	1004	0.0136312	0.00192289	4.54656	4.54656	PAX7 up vs OCT4	1.9234	10.7472	3.75205	4.51138	12.2371	10.1718	1
ENSG00000067208	9.5869e-05	0.00482085	3.43147	3.43147	MYOG up vs OCT4	1.54888	7.60223	3.30383	12.8797	29.8692	8.69663	1	1016	9.5869e-05	0.000102809	7.02732	7.02732	PAX7 up vs OCT4	3.17196	15.5687	5.22457	12.8797	29.8692	8.69663	1
ENSG00000067445	6.3623e-08	3.52476e-08	20135.1	20135.1	MYOG up vs OCT4	2573.52	157536	10.2679	41.2329	639.561	58.166	1	1023	6.3623e-08	4.54181e-07	3392.13	3392.13	PAX7 up vs OCT4	433.556	26539.9	8.42265	41.2329	639.561	58.166	1
ENSG00000067798	6.10398e-14	1.79588e-14	5.47336e+16	5.47336e+16	MYOG up vs OCT4	3057190000000000	9.79907e+17	28.4746	284.124	8667.28	114.395	1	1032	6.10398e-14	0.000361783	491.637	491.637	PAX7 up vs OCT4	27.4608	8801.89	4.57895	284.124	8667.28	114.395	1
ENSG00000069431	4.11613e-13	9.44125e-14	39620.9	39620.9	MYOG up vs OCT4	16317.5	96204.6	25.4373	219.345	632.676	10.8164	1	1088	4.11613e-13	1.37171e-05	13.8859	13.8859	PAX7 up vs OCT4	5.71878	33.7167	6.32111	219.345	632.676	10.8164	1
ENSG00000070193	3.32539e-06	0.00210863	44.7542	44.7542	MYOG up vs OCT4	5.03081	398.133	3.707	22.5891	395.485	65.6542	1	1117	3.32539e-06	1.4092e-06	2642.11	2642.11	PAX7 up vs OCT4	297	23504.2	7.68411	22.5891	395.485	65.6542	1
ENSG00000070601	8.71544e-11	3.55148e-07	94.6759	94.6759	MYOG up vs OCT4	30.6068	292.86	8.58905	105.259	491.948	17.5263	1	1133	8.71544e-11	3.10715e-11	8434.72	8434.72	PAX7 up vs OCT4	2726.78	26091.1	17.0633	105.259	491.948	17.5263	1
ENSG00000070778	7.18258e-11	2.89891e-11	11461.2	11461.2	MYOG up vs OCT4	3586.15	36629.8	17.1462	108.119	534.963	18.5546	1	1145	7.18258e-11	0.00245377	7.24583	7.24583	PAX7 up vs OCT4	2.26717	23.1575	3.63302	108.119	534.963	18.5546	1
ENSG00000071205	2.87179e-06	1.40107e-06	94.8812	94.8812	MYOG up vs OCT4	26.8536	335.241	7.68777	23.1194	135.001	21.8974	1	1163	2.87179e-06	0.00599964	6.64111	6.64111	PAX7 up vs OCT4	1.87959	23.4649	3.19708	23.1194	135.001	21.8974	1
ENSG00000072195	1.60065e-08	2.41324e-09	89.6807	89.6807	MYOG up vs OCT4	41.7147	192.801	12.5209	50.4166	108.253	8.05192	1	1197	1.60065e-08	0.000291144	5.38548	5.38548	PAX7 up vs OCT4	2.50504	11.578	4.68869	50.4166	108.253	8.05192	1
ENSG00000072364	2.05312e-05	1.35834e-05	94550.7	94550.7	MYOG up vs OCT4	1992.36	4487060	6.32667	16.7994	917.31	204.764	1	1203	2.05312e-05	0.00290379	620.366	620.366	PAX7 up vs OCT4	13.0722	29440.5	3.55091	16.7994	917.31	204.764	1
ENSG00000072422	1.97759e-06	2.16996e-05	66.1445	66.1445	MYOG up vs OCT4	15.1545	288.699	6.06342	24.5157	195.1	29.8432	1	1206	1.97759e-06	1.81744e-06	181.569	181.569	PAX7 up vs OCT4	41.5998	792.489	7.52406	24.5157	195.1	29.8432	1
ENSG00000072736	2.3043e-10	1.74866e-06	6.19487	6.19487	MYOG up vs OCT4	3.70152	10.3678	7.5482	91.9498	89.3759	3.64503	1	1216	2.3043e-10	1.75677e-09	22.1012	22.1012	PAX7 up vs OCT4	13.2057	36.9886	12.8125	91.9498	89.3759	3.64503	1
ENSG00000072958	9.33748e-05	0.000608006	7.28258	7.28258	MYOG up vs OCT4	2.73371	19.4007	4.31909	12.9402	45.5332	13.1953	1	1229	9.33748e-05	4.64358e-06	24.4223	24.4223	PAX7 up vs OCT4	9.16754	65.0607	6.95127	12.9402	45.5332	13.1953	1
ENSG00000073331	2.64589e-05	3.35092e-05	4.01646	4.01646	MYOG up vs OCT4	2.41461	6.68099	5.82388	16.098	15.278	3.55898	1	1240	2.64589e-05	0.000101159	3.48806	3.48806	PAX7 up vs OCT4	2.09694	5.80205	5.23305	16.098	15.278	3.55898	1
ENSG00000073464	3.1354e-08	4.1362e-06	4.01083	4.01083	MYOG up vs OCT4	2.63081	6.11474	7.02051	45.7312	29.807	2.4442	1	1243	3.1354e-08	5.42569e-06	3.88449	3.88449	PAX7 up vs OCT4	2.54794	5.92213	6.85874	45.7312	29.807	2.4442	1
ENSG00000073614	4.06919e-05	0.00255368	11.0901	11.0901	MYOG up vs OCT4	2.68276	45.8447	3.61356	14.9604	110.439	27.6829	1	1249	4.06919e-05	0.000304712	22.3441	22.3441	PAX7 up vs OCT4	5.40518	92.3671	4.66563	14.9604	110.439	27.6829	1
ENSG00000074054	4.57994e-06	0.000191714	13.9789	13.9789	MYOG up vs OCT4	4.43992	44.0117	4.90169	21.467	103.495	18.0792	1	1266	4.57994e-06	0.00122836	8.47448	8.47448	PAX7 up vs OCT4	2.69164	26.6815	3.97157	21.467	103.495	18.0792	1
ENSG00000075223	1.65138e-08	4.53093e-07	183967000	183967000	MYOG up vs OCT4	1491600	22689700000	8.42427	50.1897	4264.61	318.637	1	1309	1.65138e-08	0.00264653	3373.19	3373.19	PAX7 up vs OCT4	27.3498	416034	3.59614	50.1897	4264.61	318.637	1
ENSG00000075399	5.01466e-06	0.000562158	2.13358	2.13358	MYOG up vs OCT4	1.47282	3.09077	4.35814	21.1578	10.6517	1.8879	1	1321	5.01466e-06	4.40635e-05	2.68263	2.68263	PAX7 up vs OCT4	1.85184	3.88615	5.67511	21.1578	10.6517	1.8879	1
ENSG00000075945	2.95901e-05	3.33681e-06	207.832	207.832	MYOG up vs OCT4	42.3444	1020.07	7.15005	15.7962	146.529	34.7859	1	1346	2.95901e-05	0.000340746	31.1941	31.1941	PAX7 up vs OCT4	6.35558	153.105	4.60915	15.7962	146.529	34.7859	1
ENSG00000076321	0.000460392	8.4241e-05	13.7845	13.7845	MYOG up vs OCT4	4.82711	39.3636	5.32924	9.62883	38.8561	15.1327	1	1357	0.000460392	0.00587688	4.84946	4.84946	PAX7 up vs OCT4	1.6982	13.8483	3.20717	9.62883	38.8561	15.1327	1
ENSG00000076356	3.81797e-10	1.45532e-07	2377.9	2377.9	MYOG up vs OCT4	393.548	14367.8	9.21175	85.6889	1016.17	44.4706	1	1360	3.81797e-10	1.57122e-10	380675	380675	PAX7 up vs OCT4	63002.4	2300120	15.2262	85.6889	1016.17	44.4706	1
ENSG00000076641	6.14798e-06	1.28955e-05	31.4475	31.4475	MYOG up vs OCT4	9.89453	99.9489	6.3562	20.4762	100.348	18.3776	1	1366	6.14798e-06	4.61999e-06	43.5017	43.5017	PAX7 up vs OCT4	13.6872	138.26	6.95431	20.4762	100.348	18.3776	1
ENSG00000076706	7.8391e-09	3.51208e-05	15.2153	15.2153	MYOG up vs OCT4	5.59334	41.3894	5.79824	55.8728	205.078	13.7642	1	1370	7.8391e-09	1.19242e-09	486.013	486.013	PAX7 up vs OCT4	178.664	1322.08	13.1761	55.8728	205.078	13.7642	1
ENSG00000077274	1.75542e-08	3.96073e-09	3.41413e+75	3.41413e+75	MYOG up vs OCT4	1.59415e+62	7.31189e+88	12.077	49.7482	171794	12949.7	1	1394	1.75542e-08	0.00823068	1.0663e+19	1.0663e+19	PAX7 up vs OCT4	497887	2.28365e+32	3.04236	49.7482	171794	12949.7	1
ENSG00000077454	6.23489e-05	0.000447963	4.26945	4.26945	MYOG up vs OCT4	2.13745	8.528	4.4716	13.8949	24.3776	6.57913	1	1401	6.23489e-05	0.00184516	3.40233	3.40233	PAX7 up vs OCT4	1.70334	6.79598	3.77221	13.8949	24.3776	6.57913	1
ENSG00000078142	0.00624909	0.0129235	2.60774	2.60774	MYOG up vs OCT4	1.26373	5.38115	2.82014	5.50155	10.5816	7.21272	1	1430	0.00624909	0.00553382	3.00419	3.00419	PAX7 up vs OCT4	1.45585	6.19923	3.23654	5.50155	10.5816	7.21272	1
ENSG00000078246	0.000460551	0.00526499	30.0892	30.0892	MYOG up vs OCT4	3.25123	278.467	3.26084	9.62819	174.721	68.0506	1	1433	0.000460551	0.000212502	157.92	157.92	PAX7 up vs OCT4	17.0637	1461.5	4.84896	9.62819	174.721	68.0506	1
ENSG00000078399	3.19212e-06	0.000125017	217.463	217.463	MYOG up vs OCT4	23.1639	2041.54	5.12252	22.736	417.905	68.928	1	1440	3.19212e-06	0.000136665	207.145	207.145	PAX7 up vs OCT4	22.0649	1944.68	5.07625	22.736	417.905	68.928	1
ENSG00000078596	6.35978e-09	1.55244e-05	54970300	54970300	MYOG up vs OCT4	126166	23950400000	6.25106	57.572	7792.4	507.564	1	1447	6.35978e-09	4.20084e-09	775637000000000	775637000000000	PAX7 up vs OCT4	1780220000000	3.37943e+17	12.0251	57.572	7792.4	507.564	1
ENSG00000078699	7.37647e-05	0.00080704	4.51148	4.51148	MYOG up vs OCT4	2.09199	9.72921	4.17861	13.4912	29.2036	8.11739	1	1452	7.37647e-05	0.000532385	4.86048	4.86048	PAX7 up vs OCT4	2.25383	10.4819	4.38527	13.4912	29.2036	8.11739	1
ENSG00000079102	6.08471e-07	7.09017e-05	2.49463	2.49463	MYOG up vs OCT4	1.74138	3.5737	5.42043	29.4116	13.9289	1.77594	1	1464	6.08471e-07	0.000117081	2.38609	2.38609	PAX7 up vs OCT4	1.66561	3.41822	5.15667	29.4116	13.9289	1.77594	1
ENSG00000079308	8.04936e-06	0.00532845	4.51492	4.51492	MYOG up vs OCT4	1.68256	12.1152	3.255	19.6028	70.001	13.3912	1	1474	8.04936e-06	0.000116243	10.9111	10.9111	PAX7 up vs OCT4	4.0662	29.2785	5.16041	19.6028	70.001	13.3912	1
ENSG00000079482	0.00281927	0.00288721	4.47884	4.47884	MYOG up vs OCT4	1.82225	11.0084	3.5537	6.61754	19.6149	11.1153	1	1486	0.00281927	0.00527276	3.95705	3.95705	PAX7 up vs OCT4	1.60996	9.72589	3.26013	6.61754	19.6149	11.1153	1
ENSG00000080503	3.1798e-07	0.000554015	14.2637	14.2637	MYOG up vs OCT4	3.89644	52.215	4.36541	32.4535	200.294	23.144	1	1511	3.1798e-07	8.55097e-08	344.922	344.922	PAX7 up vs OCT4	94.2229	1262.65	9.59789	32.4535	200.294	23.144	1
ENSG00000081138	1.20301e-12	5.6721e-05	5.14154	5.14154	MYOG up vs OCT4	2.73827	9.65407	5.53933	189.559	275.773	5.45556	1	1542	1.20301e-12	7.24225e-13	693.391	693.391	PAX7 up vs OCT4	369.284	1301.95	22.1309	189.559	275.773	5.45556	1
ENSG00000081692	0.00607698	0.0006265	9.4837	9.4837	MYOG up vs OCT4	3.11297	28.8922	4.30419	5.53882	25.1927	17.0564	1	1557	0.00607698	0.00662818	5.18358	5.18358	PAX7 up vs OCT4	1.70148	15.7918	3.14839	5.53882	25.1927	17.0564	1
ENSG00000082014	1.91394e-10	6.0836e-11	653159	653159	MYOG up vs OCT4	113146	3770510	16.2789	94.3593	1062.94	42.243	1	1570	1.91394e-10	3.39227e-08	4769.43	4769.43	PAX7 up vs OCT4	826.201	27532.6	10.2977	94.3593	1062.94	42.243	1
ENSG00000083097	9.30954e-07	1.55759e-06	19.5179	19.5179	MYOG up vs OCT4	8.50193	44.8072	7.62088	27.556	69.7506	9.49211	1	1602	9.30954e-07	0.00763729	3.32176	3.32176	PAX7 up vs OCT4	1.44695	7.62578	3.07904	27.556	69.7506	9.49211	1
ENSG00000083099	0.00563177	0.0104762	3.52989	3.52989	MYOG up vs OCT4	1.40749	8.85277	2.92381	5.64105	17.479	11.6195	1	1603	0.00563177	0.00028593	7.5879	7.5879	PAX7 up vs OCT4	3.02555	19.03	4.69785	5.64105	17.479	11.6195	1
ENSG00000083168	3.64857e-07	0.00205597	8.74601	8.74601	MYOG up vs OCT4	2.52399	30.3063	3.71935	31.7868	179.932	21.2272	1	1605	3.64857e-07	1.04719e-05	43.6164	43.6164	PAX7 up vs OCT4	12.5871	151.138	6.47523	31.7868	179.932	21.2272	1
ENSG00000083290	0.000107036	0.0110178	3.11639	3.11639	MYOG up vs OCT4	1.35113	7.18797	2.89896	12.6288	32.3287	9.59969	1	1607	0.000107036	2.75028e-05	10.237	10.237	PAX7 up vs OCT4	4.43832	23.6118	5.93224	12.6288	32.3287	9.59969	1
ENSG00000083642	1.80611e-06	0.0014348	12.4476	12.4476	MYOG up vs OCT4	3.13241	49.4647	3.89534	24.8658	173.492	26.1642	1	1618	1.80611e-06	6.06467e-06	81.2249	81.2249	PAX7 up vs OCT4	20.44	322.774	6.79297	24.8658	173.492	26.1642	1
ENSG00000083750	0.0212224	0.00877866	4.08065	4.08065	MYOG up vs OCT4	1.50787	11.0432	3.01074	3.99021	14.495	13.6224	1	1620	0.0212224	0.00694433	4.30556	4.30556	PAX7 up vs OCT4	1.59098	11.6519	3.1256	3.99021	14.495	13.6224	1
ENSG00000083812	1.40557e-07	7.59352e-07	4.18347	4.18347	MYOG up vs OCT4	2.86826	6.10175	8.08195	36.673	19.1478	1.95796	1	1624	1.40557e-07	1.09241e-07	5.30067	5.30067	PAX7 up vs OCT4	3.63424	7.73123	9.4186	36.673	19.1478	1.95796	1
ENSG00000083838	5.88922e-07	0.000188827	2.29497	2.29497	MYOG up vs OCT4	1.60009	3.29161	4.90948	29.5584	14.0916	1.78776	1	1628	5.88922e-07	4.61347e-05	2.60147	2.60147	PAX7 up vs OCT4	1.81379	3.73121	5.65032	29.5584	14.0916	1.78776	1
ENSG00000084070	3.88938e-05	0.00234036	5.33578	5.33578	MYOG up vs OCT4	2.01027	14.1626	3.65611	15.0768	52.656	13.0969	1	1635	3.88938e-05	1.45953e-06	33.4156	33.4156	PAX7 up vs OCT4	12.5894	88.6938	7.66191	15.0768	52.656	13.0969	1
ENSG00000084636	2.84834e-05	6.85697e-05	1075.06	1075.06	MYOG up vs OCT4	69.709	16579.7	5.43819	15.8985	436.129	102.87	1	1650	2.84834e-05	0.00511517	66.9204	66.9204	PAX7 up vs OCT4	4.33925	1032.05	3.27493	15.8985	436.129	102.87	1
ENSG00000084676	2.1093e-10	8.39628e-11	3.12546e+18	3.12546e+18	MYOG up vs OCT4	1.04194e+16	9.37528e+20	15.9144	93.0901	11099.4	447.124	1	1653	2.1093e-10	4.32677e-06	134129000	134129000	PAX7 up vs OCT4	447151	40234100000	6.99351	93.0901	11099.4	447.124	1
ENSG00000085433	3.47953e-05	0.00226156	4.81505	4.81505	MYOG up vs OCT4	1.93405	11.9877	3.67282	15.3667	46.858	11.435	1	1674	3.47953e-05	2.49425e-05	12.958	12.958	PAX7 up vs OCT4	5.20482	32.2606	5.98616	15.3667	46.858	11.435	1
ENSG00000085982	3.29746e-06	4.07904e-05	3.53712	3.53712	MYOG up vs OCT4	2.20848	5.66507	5.71689	22.6193	18.3917	3.04911	1	1696	3.29746e-06	1.16813e-07	7.92934	7.92934	PAX7 up vs OCT4	4.95087	12.6997	9.36997	22.6193	18.3917	3.04911	1
ENSG00000087074	0.00150745	0.000857591	8239160000	8239160000	MYOG up vs OCT4	66269.3	1024360000000000	4.14857	7.57887	3822.44	1891.33	1	1733	0.00150745	0.000459418	45473300000	45473300000	PAX7 up vs OCT4	365751	5653620000000000	4.45896	7.57887	3822.44	1891.33	1
ENSG00000087589	7.39773e-08	1.42444e-08	7836.67	7836.67	MYOG up vs OCT4	1376.74	44607.9	10.9895	40.328	447.037	41.5688	1	1771	7.39773e-08	0.00706045	12.7257	12.7257	PAX7 up vs OCT4	2.23564	72.4373	3.11748	40.328	447.037	41.5688	1
ENSG00000088387	9.47483e-08	2.07151e-06	3742.41	3742.41	MYOG up vs OCT4	354.689	39487	7.44255	38.8817	791.179	76.3063	1	1794	9.47483e-08	1.08998e-07	33313.6	33313.6	PAX7 up vs OCT4	3157.32	351500	9.42022	38.8817	791.179	76.3063	1
ENSG00000088854	0.000290846	0.00639516	2.72018	2.72018	MYOG up vs OCT4	1.38676	5.33571	3.16588	10.512	17.4879	6.23857	1	1812	0.000290846	8.42777e-05	5.3894	5.3894	PAX7 up vs OCT4	2.74755	10.5715	5.32901	10.512	17.4879	6.23857	1
ENSG00000088881	0.000193155	0.00949888	2.01653	2.01653	MYOG up vs OCT4	1.21941	3.33473	2.972	11.3452	10.521	3.47758	1	1814	0.000193155	0.000628243	2.76059	2.76059	PAX7 up vs OCT4	1.66934	4.56517	4.30281	11.3452	10.521	3.47758	1
ENSG00000089177	3.81583e-10	0.00576551	2.46451	2.46451	MYOG up vs OCT4	1.35565	4.48036	3.21652	85.6956	112.21	4.91026	1	1845	3.81583e-10	4.01735e-10	54.2998	54.2998	PAX7 up vs OCT4	29.8686	98.7146	14.2445	85.6956	112.21	4.91026	1
ENSG00000089335	0.00120077	0.00259887	25.1102	25.1102	MYOG up vs OCT4	3.73415	168.853	3.605	7.94787	105.797	49.9176	1	1856	0.00120077	0.000578273	48.6216	48.6216	PAX7 up vs OCT4	7.23055	326.954	4.34405	7.94787	105.797	49.9176	1
ENSG00000090097	5.15195e-06	5.51934e-07	1502720000	1502720000	MYOG up vs OCT4	6577570	343311000000	8.29233	21.0663	2277.7	405.451	1	1884	5.15195e-06	3.77986e-06	67505400	67505400	PAX7 up vs OCT4	295479	15422300000	7.07468	21.0663	2277.7	405.451	1
ENSG00000090487	0.00201903	0.00247494	1847.91	1847.91	MYOG up vs OCT4	22.2816	153255	3.62883	7.12053	509.404	268.276	1	1899	0.00201903	0.00214194	2138.75	2138.75	PAX7 up vs OCT4	25.7884	177375	3.69935	7.12053	509.404	268.276	1
ENSG00000092969	4.18225e-11	6.90444e-09	2492.62	2492.62	MYOG up vs OCT4	591.894	10497.1	11.5946	116.518	882.789	28.4116	1	2010	4.18225e-11	9.58035e-09	2067.93	2067.93	PAX7 up vs OCT4	491.048	8708.62	11.3177	116.518	882.789	28.4116	1
ENSG00000094631	1.01929e-06	0.000533731	12.4005	12.4005	MYOG up vs OCT4	3.64605	42.1749	4.38401	27.1739	149.234	20.5943	1	2022	1.01929e-06	4.87506e-06	53.2746	53.2746	PAX7 up vs OCT4	15.6641	181.191	6.92228	27.1739	149.234	20.5943	1
ENSG00000096654	0.000174645	0.00722855	10.7099	10.7099	MYOG up vs OCT4	2.10427	54.5092	3.10597	11.5572	112.156	36.3916	1	2084	0.000174645	0.000184906	42.787	42.787	PAX7 up vs OCT4	8.40675	217.769	4.92025	11.5572	112.156	36.3916	1
ENSG00000096968	0.00159593	0.000161462	5.206	5.206	MYOG up vs OCT4	2.57309	10.533	4.99002	7.48804	13.6292	6.8255	1	2089	0.00159593	0.00155633	3.57768	3.57768	PAX7 up vs OCT4	1.76829	7.23854	3.8555	7.48804	13.6292	6.8255	1
ENSG00000099260	1.44992e-08	5.13868e-09	653805	653805	MYOG up vs OCT4	58794.6	7270400	11.849	51.1418	1087.56	79.7456	1	2105	1.44992e-08	2.68172e-06	3755.07	3755.07	PAX7 up vs OCT4	337.682	41757	7.28328	51.1418	1087.56	79.7456	1
ENSG00000099864	0.0219609	0.00714064	14.7299	14.7299	MYOG up vs OCT4	2.33385	92.9663	3.11196	3.95109	49.1534	46.6518	1	2146	0.0219609	0.00303962	21.1162	21.1162	PAX7 up vs OCT4	3.34571	133.273	3.52863	3.95109	49.1534	46.6518	1
ENSG00000099869	9.41643e-06	2.14189e-06	567.185	567.185	MYOG up vs OCT4	91.8103	3503.95	7.42183	19.1085	232.229	45.5744	1	2148	9.41643e-06	0.000214348	62.7296	62.7296	PAX7 up vs OCT4	10.1541	387.53	4.84454	19.1085	232.229	45.5744	1
ENSG00000099910	4.74638e-06	8.31091e-05	4.09078	4.09078	MYOG up vs OCT4	2.33045	7.1808	5.33638	21.3448	24.7684	4.35147	1	2154	4.74638e-06	8.76196e-07	8.23932	8.23932	PAX7 up vs OCT4	4.6938	14.463	7.98871	21.3448	24.7684	4.35147	1
ENSG00000099940	0.000359595	0.00523285	2.47856	2.47856	MYOG up vs OCT4	1.37015	4.48364	3.26383	10.0974	13.0033	4.82922	1	2157	0.000359595	3.61094e-05	4.99427	4.99427	PAX7 up vs OCT4	2.76083	9.0345	5.78311	10.0974	13.0033	4.82922	1
ENSG00000099949	0.000156822	0.00555477	3.0778	3.0778	MYOG up vs OCT4	1.46731	6.45593	3.2347	11.7869	23.7067	7.54227	1	2159	0.000156822	1.75304e-05	8.57434	8.57434	PAX7 up vs OCT4	4.08773	17.9853	6.18265	11.7869	23.7067	7.54227	1
ENSG00000100034	0.000425482	3.9752e-05	245.389	245.389	MYOG up vs OCT4	31.6964	1899.76	5.73087	9.77671	150.095	57.571	1	2188	0.000425482	0.0056055	22.2364	22.2364	PAX7 up vs OCT4	2.87223	172.151	3.23026	9.77671	150.095	57.571	1
ENSG00000100234	5.58814e-06	0.000364816	300.918	300.918	MYOG up vs OCT4	21.0716	4297.33	4.57474	20.7933	538.791	97.1691	1	2249	5.58814e-06	0.00124605	140.561	140.561	PAX7 up vs OCT4	9.84267	2007.31	3.96455	20.7933	538.791	97.1691	1
ENSG00000100320	1.33273e-12	1.59667e-12	1.72941e+22	1.72941e+22	MYOG up vs OCT4	9.47579e+19	3.15633e+24	20.9611	186.931	18574.3	372.616	1	2283	1.33273e-12	8.36606e-11	7.72749e+16	7.72749e+16	PAX7 up vs OCT4	423404000000000	1.41033e+19	15.9184	186.931	18574.3	372.616	1
ENSG00000100485	2.60225e-08	8.59264e-09	99.569	99.569	MYOG up vs OCT4	42.1534	235.188	11.4091	46.9883	127.235	10.1542	1	2344	2.60225e-08	7.78705e-08	49.3217	49.3217	PAX7 up vs OCT4	20.8808	116.501	9.66705	46.9883	127.235	10.1542	1
ENSG00000100503	8.46248e-08	1.2694e-08	4512910	4512910	MYOG up vs OCT4	237034	85921400	11.084	39.5362	1258.04	119.325	1	2346	8.46248e-08	0.00353468	118.663	118.663	PAX7 up vs OCT4	6.23261	2259.23	3.4551	39.5362	1258.04	119.325	1
ENSG00000100625	0.00010656	9.45005e-05	6595.54	6595.54	MYOG up vs OCT4	188.016	231370	5.26876	12.6389	586.297	173.956	1	2379	0.00010656	0.000611686	1344.85	1344.85	PAX7 up vs OCT4	38.3368	47176.9	4.31609	12.6389	586.297	173.956	1
ENSG00000100647	1.94817e-10	4.33191e-08	3.12482	3.12482	MYOG up vs OCT4	2.4575	3.97336	10.109	94.1266	19.91	0.793214	1	2385	1.94817e-10	5.13887e-09	3.80185	3.80185	PAX7 up vs OCT4	2.98994	4.83423	11.8489	94.1266	19.91	0.793214	1
ENSG00000101098	8.07155e-08	2.51521e-06	6864750	6864750	MYOG up vs OCT4	70249.2	670822000	7.32264	39.8131	3063.69	288.569	1	2458	8.07155e-08	7.8986e-05	101690	101690	PAX7 up vs OCT4	1040.63	9937180	5.36324	39.8131	3063.69	288.569	1
ENSG00000101198	1.41527e-07	4.22094e-07	4844860	4844860	MYOG up vs OCT4	100773	232926000	8.47199	36.6355	2013.91	206.144	1	2486	1.41527e-07	2.7335e-06	547045	547045	PAX7 up vs OCT4	11378.6	26300200	7.27157	36.6355	2013.91	206.144	1
ENSG00000101224	0.000185686	5.29661e-05	6655.36	6655.36	MYOG up vs OCT4	230.015	192569	5.57603	11.4279	474.277	155.632	1	2496	0.000185686	0.000754566	772.424	772.424	PAX7 up vs OCT4	26.6957	22349.6	4.21189	11.4279	474.277	155.632	1
ENSG00000101298	4.11642e-05	4.94936e-05	7.12628	7.12628	MYOG up vs OCT4	3.38042	15.023	5.61246	14.9308	30.4373	7.64459	1	2512	4.11642e-05	0.00126818	3.99148	3.99148	PAX7 up vs OCT4	1.8934	8.41447	3.9559	14.9308	30.4373	7.64459	1
ENSG00000101353	3.71815e-06	2.23611e-06	2.73194	2.73194	MYOG up vs OCT4	2.04489	3.64982	7.39517	22.1923	6.82477	1.15323	1	2530	3.71815e-06	1.33512e-05	2.36584	2.36584	PAX7 up vs OCT4	1.77086	3.16071	6.33646	22.1923	6.82477	1.15323	1
ENSG00000101493	7.55721e-05	0.000489273	152.943	152.943	MYOG up vs OCT4	13.5788	1722.65	4.42745	13.4339	288.721	80.5953	1	2566	7.55721e-05	8.45075e-05	425.26	425.26	PAX7 up vs OCT4	37.756	4789.86	5.32757	13.4339	288.721	80.5953	1
ENSG00000101846	0.000220954	8.46568e-05	17.3507	17.3507	MYOG up vs OCT4	5.53868	54.3537	5.32664	11.0665	52.8858	17.9209	1	2597	0.000220954	0.00812323	5.12091	5.12091	PAX7 up vs OCT4	1.63469	16.042	3.04881	11.0665	52.8858	17.9209	1
ENSG00000101871	7.78649e-10	8.79447e-08	2156880000	2156880000	MYOG up vs OCT4	18052700	257697000000	9.57721	77.5396	6501.83	314.444	1	2602	7.78649e-10	5.60262e-09	298435000000	298435000000	PAX7 up vs OCT4	2497850000	35656100000000	11.7741	77.5396	6501.83	314.444	1
ENSG00000101940	3.67272e-10	4.87774e-10	36.5367	36.5367	MYOG up vs OCT4	21.1657	63.0704	14.0486	86.155	94.1131	4.09638	1	2615	3.67272e-10	5.5006e-11	66.6288	66.6288	PAX7 up vs OCT4	38.5981	115.016	16.3944	86.155	94.1131	4.09638	1
ENSG00000101997	3.29603e-07	0.00632874	2.07919	2.07919	MYOG up vs OCT4	1.2712	3.40076	3.17099	32.2783	28.6391	3.32722	1	2626	3.29603e-07	7.69853e-05	3.45965	3.45965	PAX7 up vs OCT4	2.1152	5.65864	5.37681	32.2783	28.6391	3.32722	1
ENSG00000102226	2.30736e-06	2.83343e-05	47175.5	47175.5	MYOG up vs OCT4	976.783	2278420	5.91584	23.93	1318.58	206.63	1	2669	2.30736e-06	0.00236198	767.195	767.195	PAX7 up vs OCT4	15.885	37053.1	3.65162	23.93	1318.58	206.63	1
ENSG00000102316	0.00068384	0.000323442	3.42559e+31	3.42559e+31	MYOG up vs OCT4	1.08301e+17	1.08353e+46	4.63546	8.90951	36401.2	15321.2	1	2683	0.00068384	0.00087934	1.37498e+28	1.37498e+28	PAX7 up vs OCT4	43470300000000	4.34913e+42	4.1362	8.90951	36401.2	15321.2	1
ENSG00000102606	6.68725e-06	1.95507e-05	43.3414	43.3414	MYOG up vs OCT4	11.6669	161.01	6.12156	20.2003	127.512	23.6714	1	2711	6.68725e-06	0.000308564	17.6152	17.6152	PAX7 up vs OCT4	4.74175	65.4391	4.65927	20.2003	127.512	23.6714	1
ENSG00000102678	0.000141286	7.17989e-05	228132000000	228132000000	MYOG up vs OCT4	7697590	6761070000000000	5.41376	12.0127	4668	1457.21	1	2712	0.000141286	0.00231545	48034700	48034700	PAX7 up vs OCT4	1620.78	1423590000000	3.66133	12.0127	4668	1457.21	1
ENSG00000102781	0.000100453	0.0122521	7.18979	7.18979	MYOG up vs OCT4	1.64141	31.4931	2.84653	12.7729	102.141	29.9877	1	2723	0.000100453	5.81687e-05	46.0371	46.0371	PAX7 up vs OCT4	10.5101	201.654	5.52585	12.7729	102.141	29.9877	1
ENSG00000102910	0.0282221	0.00371756	43.9175	43.9175	MYOG up vs OCT4	4.18826	460.514	3.43051	3.66897	74.2643	75.9044	1	2748	0.0282221	0.00799597	29.0784	29.0784	PAX7 up vs OCT4	2.7731	304.912	3.05655	3.66897	74.2643	75.9044	1
ENSG00000102984	6.95662e-06	0.000199598	2.77272	2.77272	MYOG up vs OCT4	1.77622	4.32826	4.88103	20.0718	14.59	2.72584	1	2761	6.95662e-06	0.000206939	2.76202	2.76202	PAX7 up vs OCT4	1.76937	4.31157	4.86253	20.0718	14.59	2.72584	1
ENSG00000103227	6.81853e-06	7.03572e-05	2.48402	2.48402	MYOG up vs OCT4	1.73735	3.55158	5.42452	20.137	9.43357	1.75676	1	2805	6.81853e-06	0.000698171	2.03997	2.03997	PAX7 up vs OCT4	1.42678	2.9167	4.2504	20.137	9.43357	1.75676	1
ENSG00000103319	1.93474e-05	0.00971399	5.30067	5.30067	MYOG up vs OCT4	1.59561	17.6091	2.96099	16.967	89.6349	19.8108	1	2822	1.93474e-05	3.01404e-05	27.4698	27.4698	PAX7 up vs OCT4	8.26895	91.2559	5.88189	16.967	89.6349	19.8108	1
ENSG00000103742	0.000243613	0.00535703	39.0466	39.0466	MYOG up vs OCT4	3.53623	431.147	3.25239	10.8672	229.744	79.2785	1	2874	0.000243613	0.000148952	289.928	289.928	PAX7 up vs OCT4	26.2571	3201.34	5.03167	10.8672	229.744	79.2785	1
ENSG00000103942	4.69982e-05	7.84637e-05	460.434	460.434	MYOG up vs OCT4	40.3152	5258.55	5.36675	14.5939	317.26	81.5221	1	2883	4.69982e-05	0.00033958	194.123	194.123	PAX7 up vs OCT4	16.9972	2217.05	4.61088	14.5939	317.26	81.5221	1
ENSG00000104044	4.97734e-08	0.000159814	2.09841	2.09841	MYOG up vs OCT4	1.52948	2.87898	4.99532	42.7457	15.6695	1.37466	1	2889	4.97734e-08	1.92491e-08	4.92518	4.92518	PAX7 up vs OCT4	3.58983	6.75724	10.7454	42.7457	15.6695	1.37466	1
ENSG00000104313	5.93707e-08	0.000876354	1466.62	1466.62	MYOG up vs OCT4	34.3025	62705.6	4.13788	41.6542	2153.19	193.845	1	2919	5.93707e-08	2.1777e-08	140235000	140235000	PAX7 up vs OCT4	3279950	5995810000	10.6467	41.6542	2153.19	193.845	1
ENSG00000104324	3.79047e-05	7.90952e-05	3.44571	3.44571	MYOG up vs OCT4	2.10729	5.63419	5.36251	15.1435	13.4202	3.32325	1	2922	3.79047e-05	4.85464e-05	3.659	3.659	PAX7 up vs OCT4	2.23774	5.98295	5.62286	15.1435	13.4202	3.32325	1
ENSG00000104331	0.00525446	0.000352424	696803000	696803000	MYOG up vs OCT4	54774.4	8864250000000	4.59215	5.73509	1877.53	1227.66	1	2925	0.00525446	0.00751003	881347	881347	PAX7 up vs OCT4	69.2811	11211900000	3.08727	5.73509	1877.53	1227.66	1
ENSG00000104427	0.000108572	0.000313191	13.527	13.527	MYOG up vs OCT4	4.10091	44.6196	4.65174	12.5966	65.7619	19.5772	1	2943	0.000108572	0.000161896	16.3353	16.3353	PAX7 up vs OCT4	4.95229	53.8829	4.98864	12.5966	65.7619	19.5772	1
ENSG00000104490	1.19682e-06	1.00092e-06	1494.89	1494.89	MYOG up vs OCT4	208.149	10736.1	7.90264	26.5083	377.649	53.4242	1	2950	1.19682e-06	1.20453e-05	370.679	370.679	PAX7 up vs OCT4	51.6134	2662.15	6.39508	26.5083	377.649	53.4242	1
ENSG00000104957	1.23098e-05	1.60112e-05	10.9276	10.9276	MYOG up vs OCT4	4.82419	24.7527	6.23364	18.2877	44.8103	9.18862	1	3034	1.23098e-05	0.000111941	7.29458	7.29458	PAX7 up vs OCT4	3.22034	16.5234	5.18008	18.2877	44.8103	9.18862	1
ENSG00000104960	1.51697e-06	0.0132523	12.2748	12.2748	MYOG up vs OCT4	1.82934	82.3632	2.8077	25.5512	339.35	49.8045	1	3035	1.51697e-06	3.71277e-05	172.667	172.667	PAX7 up vs OCT4	25.733	1158.59	5.76798	25.5512	339.35	49.8045	1
ENSG00000104964	9.26384e-08	0.000307171	1739.16	1739.16	MYOG up vs OCT4	57.3757	52717	4.66156	39.0114	1664.1	159.963	1	3036	9.26384e-08	0.000978461	689.473	689.473	PAX7 up vs OCT4	22.746	20899.1	4.0835	39.0114	1664.1	159.963	1
ENSG00000105204	0.000686171	0.000558753	26.771	26.771	MYOG up vs OCT4	5.36928	133.479	4.36116	8.90348	84.2321	35.4772	1	3074	0.000686171	0.00717744	10.4208	10.4208	PAX7 up vs OCT4	2.09004	51.9579	3.10944	8.90348	84.2321	35.4772	1
ENSG00000105251	1.16339e-06	4.57042e-07	6842970000	6842970000	MYOG up vs OCT4	22134800	2115500000000	8.41843	26.6247	3208.21	451.866	1	3085	1.16339e-06	0.00364701	10441.7	10441.7	PAX7 up vs OCT4	33.7756	3228070	3.43985	26.6247	3208.21	451.866	1
ENSG00000105397	7.887e-06	0.00579059	3.68707	3.68707	MYOG up vs OCT4	1.55209	8.7588	3.2144	19.6677	53.9639	10.2892	1	3121	7.887e-06	6.92456e-07	27.256	27.256	PAX7 up vs OCT4	11.4736	64.7478	8.1424	19.6677	53.9639	10.2892	1
ENSG00000105617	0.000760305	9.20106e-05	4.37634	4.37634	MYOG up vs OCT4	2.41236	7.93927	5.28279	8.72303	11.3417	4.87575	1	3168	0.000760305	0.00239467	2.76912	2.76912	PAX7 up vs OCT4	1.52641	5.02354	3.64492	8.72303	11.3417	4.87575	1
ENSG00000105976	2.82187e-05	0.000915823	2307.88	2307.88	MYOG up vs OCT4	41.8452	127286	4.11613	15.9237	938.522	221.02	1	3253	2.82187e-05	3.64288e-05	52644.7	52644.7	PAX7 up vs OCT4	954.526	2903500	5.77832	15.9237	938.522	221.02	1
ENSG00000106025	1.06482e-07	1.3734e-06	17899.1	17899.1	MYOG up vs OCT4	1190.31	269155	7.70041	38.2157	1029.06	100.979	1	3269	1.06482e-07	2.99143e-06	9673.02	9673.02	PAX7 up vs OCT4	643.267	145456	7.21648	38.2157	1029.06	100.979	1
ENSG00000106211	3.13813e-09	4.35097e-09	2.92753e+30	2.92753e+30	MYOG up vs OCT4	1.12833e+25	7.59563e+35	11.9943	63.6744	36268.7	2135.99	1	3294	3.13813e-09	0.000449412	226019000000	226019000000	PAX7 up vs OCT4	871126	5.86418e+16	4.46999	63.6744	36268.7	2135.99	1
ENSG00000106261	0.000265	0.00836141	45.8595	45.8595	MYOG up vs OCT4	3.12237	673.559	3.03463	10.6975	283.077	99.2323	1	3300	0.000265	4.20598e-05	1320.83	1320.83	PAX7 up vs OCT4	89.929	19399.6	5.70029	10.6975	283.077	99.2323	1
ENSG00000106479	0.000344508	0.000366732	2.94849	2.94849	MYOG up vs OCT4	1.78106	4.88112	4.5721	10.1802	9.48089	3.4924	1	3338	0.000344508	0.000111214	3.40717	3.40717	PAX7 up vs OCT4	2.05813	5.64046	5.18349	10.1802	9.48089	3.4924	1
ENSG00000106780	7.27109e-05	0.0120004	2.26691	2.26691	MYOG up vs OCT4	1.23096	4.17467	2.85679	13.5254	18.4834	5.12461	1	3384	7.27109e-05	3.75221e-06	7.59908	7.59908	PAX7 up vs OCT4	4.12641	13.9942	7.07911	13.5254	18.4834	5.12461	1
ENSG00000107021	3.96172e-06	0.00014904	4.59352	4.59352	MYOG up vs OCT4	2.4079	8.76298	5.03137	21.9694	33.5911	5.73372	1	3407	3.96172e-06	0.000843179	3.52427	3.52427	PAX7 up vs OCT4	1.84741	6.72319	4.15695	21.9694	33.5911	5.73372	1
ENSG00000107130	2.23199e-06	5.34226e-07	1328500000	1328500000	MYOG up vs OCT4	6087350	289931000000	8.31404	24.0551	2557.19	398.646	1	3413	2.23199e-06	0.00849094	2097.78	2097.78	PAX7 up vs OCT4	9.6123	457819	3.02709	24.0551	2557.19	398.646	1
ENSG00000107140	5.33108e-05	0.000555458	3.05644	3.05644	MYOG up vs OCT4	1.77106	5.27468	4.36411	14.279	15.5827	4.0924	1	3414	5.33108e-05	0.00148244	2.6997	2.6997	PAX7 up vs OCT4	1.56435	4.65904	3.87933	14.279	15.5827	4.0924	1
ENSG00000107742	1.46397e-05	1.94805e-05	3.62718	3.62718	MYOG up vs OCT4	2.31632	5.6799	6.12357	17.772	13.1011	2.7644	1	3469	1.46397e-05	0.000136301	2.91067	2.91067	PAX7 up vs OCT4	1.85875	4.55789	5.07764	17.772	13.1011	2.7644	1
ENSG00000107771	1.4069e-05	4.52832e-05	3.4018	3.4018	MYOG up vs OCT4	2.14531	5.39421	5.66037	17.8893	13.9355	2.9212	1	3472	1.4069e-05	2.03602e-06	5.01335	5.01335	PAX7 up vs OCT4	3.16162	7.94963	7.45329	17.8893	13.9355	2.9212	1
ENSG00000107821	7.7284e-05	0.0016707	3.78371	3.78371	MYOG up vs OCT4	1.80104	7.94899	3.82079	13.3809	27.026	7.57402	1	3481	7.7284e-05	0.000441706	4.75798	4.75798	PAX7 up vs OCT4	2.26479	9.99579	4.47865	13.3809	27.026	7.57402	1
ENSG00000107859	0.000570936	0.000663471	664.189	664.189	MYOG up vs OCT4	26.0238	16951.7	4.2757	9.23297	355.141	144.242	1	3486	0.000570936	0.00167902	331.445	331.445	PAX7 up vs OCT4	12.9864	8459.26	3.81836	9.23297	355.141	144.242	1
ENSG00000107862	0.000116813	4.48225e-05	390.195	390.195	MYOG up vs OCT4	41.3492	3682.09	5.66589	12.4324	229.571	69.246	1	3487	0.000116813	0.00277282	43.0816	43.0816	PAX7 up vs OCT4	4.56539	406.542	3.57341	12.4324	229.571	69.246	1
ENSG00000107957	6.08548e-05	2.46756e-05	4187.87	4187.87	MYOG up vs OCT4	215.584	81352.1	5.99211	13.9538	450.089	120.959	1	3502	6.08548e-05	0.000577401	422.923	422.923	PAX7 up vs OCT4	21.7713	8215.55	4.34481	13.9538	450.089	120.959	1
ENSG00000107959	3.55937e-05	0.00289337	18.226	18.226	MYOG up vs OCT4	3.19396	104.005	3.55266	15.3073	170.168	41.6879	1	3503	3.55937e-05	3.29743e-06	346.581	346.581	PAX7 up vs OCT4	60.7356	1977.73	7.15725	15.3073	170.168	41.6879	1
ENSG00000108176	0.00116818	0.00141285	53.175	53.175	MYOG up vs OCT4	6.07106	465.746	3.9029	7.99324	137.96	64.7234	1	3521	0.00116818	0.000379162	103.32	103.32	PAX7 up vs OCT4	11.7962	904.954	4.55533	7.99324	137.96	64.7234	1
ENSG00000108239	0.000351411	3.377e-05	3.87474	3.87474	MYOG up vs OCT4	2.35938	6.36337	5.81965	10.1418	9.14756	3.38237	1	3526	0.000351411	0.000130671	3.27683	3.27683	PAX7 up vs OCT4	1.99531	5.38143	5.09952	10.1418	9.14756	3.38237	1
ENSG00000108292	5.55096e-08	2.90985e-08	108.472	108.472	MYOG up vs OCT4	41.5799	282.976	10.4175	42.0674	141.761	12.637	1	3536	5.55096e-08	5.01681e-08	89.7771	89.7771	PAX7 up vs OCT4	34.4138	234.206	9.99698	42.0674	141.761	12.637	1
ENSG00000108510	6.80818e-06	0.000712529	23.1903	23.1903	MYOG up vs OCT4	4.77546	112.615	4.2403	20.1419	184.348	34.3217	1	3573	6.80818e-06	0.00334061	13.2234	13.2234	PAX7 up vs OCT4	2.72303	64.2149	3.48261	20.1419	184.348	34.3217	1
ENSG00000108669	0.00281849	0.00674059	2.34709	2.34709	MYOG up vs OCT4	1.3153	4.18827	3.14016	6.61794	8.1346	4.6094	1	3602	0.00281849	0.000356186	3.4772	3.4772	PAX7 up vs OCT4	1.94861	6.20489	4.5868	6.61794	8.1346	4.6094	1
ENSG00000108823	2.52655e-07	5.00024e-08	1257150000000000	1257150000000000	MYOG up vs OCT4	760089000000	2.07926e+18	9.99949	33.596	6762.72	754.857	1	3626	2.52655e-07	0.00196445	446546	446546	PAX7 up vs OCT4	269.988	738564000	3.7416	33.596	6762.72	754.857	1
ENSG00000109220	7.83341e-06	0.000227652	11.4691	11.4691	MYOG up vs OCT4	3.89394	33.7805	4.81378	19.6895	84.2087	16.0381	1	3686	7.83341e-06	0.00780893	4.73487	4.73487	PAX7 up vs OCT4	1.60757	13.9459	3.06815	19.6895	84.2087	16.0381	1
ENSG00000109265	2.39845e-06	0.00540011	15.3549	15.3549	MYOG up vs OCT4	2.55803	92.1695	3.24848	23.7849	280.002	44.146	1	3688	2.39845e-06	2.03782e-06	526.641	526.641	PAX7 up vs OCT4	87.7351	3161.22	7.45274	23.7849	280.002	44.146	1
ENSG00000109320	9.7887e-06	2.758e-06	22.726	22.726	MYOG up vs OCT4	9.09074	56.8131	7.2661	18.9879	58.4251	11.5386	1	3691	9.7887e-06	0.000807582	6.02631	6.02631	PAX7 up vs OCT4	2.41061	15.0652	4.17828	18.9879	58.4251	11.5386	1
ENSG00000109680	1.80177e-05	0.000122448	11.9959	11.9959	MYOG up vs OCT4	4.27562	33.6566	5.13332	17.1698	66.9745	14.6277	1	3723	1.80177e-05	9.92667e-05	12.6496	12.6496	PAX7 up vs OCT4	4.50861	35.4906	5.24295	17.1698	66.9745	14.6277	1
ENSG00000109689	1.61483e-05	7.2842e-06	15.2578	15.2578	MYOG up vs OCT4	6.39991	36.3756	6.68548	17.4855	48.3741	10.3745	1	3727	1.61483e-05	0.00828137	3.45174	3.45174	PAX7 up vs OCT4	1.44784	8.22918	3.03935	17.4855	48.3741	10.3745	1
ENSG00000109738	4.28053e-07	0.00116317	5.77722	5.77722	MYOG up vs OCT4	2.2681	14.7155	3.99837	31.0275	99.4125	12.0151	1	3730	4.28053e-07	1.00536e-07	63.9501	63.9501	PAX7 up vs OCT4	25.1064	162.891	9.47911	31.0275	99.4125	12.0151	1
ENSG00000110237	1.09749e-07	3.51251e-08	92.4451	92.4451	MYOG up vs OCT4	36.1333	236.516	10.2706	38.045	123.052	12.1289	1	3793	1.09749e-07	1.00857e-07	65.1526	65.1526	PAX7 up vs OCT4	25.4657	166.689	9.47678	38.045	123.052	12.1289	1
ENSG00000110693	7.12641e-07	2.58296e-07	24.2372	24.2372	MYOG up vs OCT4	11.2058	52.4228	8.80781	28.7098	62.6237	8.17976	1	3832	7.12641e-07	4.47735e-05	7.77504	7.77504	PAX7 up vs OCT4	3.59471	16.8167	5.66648	28.7098	62.6237	8.17976	1
ENSG00000110723	3.09564e-09	2.47411e-09	27.6221	27.6221	MYOG up vs OCT4	15.6843	48.646	12.4983	63.7979	74.896	4.40234	1	3841	3.09564e-09	0.00287758	2.57032	2.57032	PAX7 up vs OCT4	1.45948	4.52667	3.55533	63.7979	74.896	4.40234	1
ENSG00000110841	9.96548e-05	0.000191833	232.397	232.397	MYOG up vs OCT4	21.7387	2484.44	4.90137	12.7911	263.182	77.158	1	3849	9.96548e-05	0.000192973	231.613	231.613	PAX7 up vs OCT4	21.6653	2476.06	4.89833	12.7911	263.182	77.158	1
ENSG00000110925	1.0532e-06	3.00316e-05	49.6604	49.6604	MYOG up vs OCT4	12.0677	204.36	5.88388	27.0371	198.317	27.5063	1	3865	1.0532e-06	4.6899e-06	100.456	100.456	PAX7 up vs OCT4	24.4114	413.392	6.94535	27.0371	198.317	27.5063	1
ENSG00000110987	1.73761e-11	1.20141e-08	17.6341	17.6341	MYOG up vs OCT4	10.1779	30.5527	11.1294	131.517	145.61	4.15182	1	3872	1.73761e-11	3.44424e-10	41.0007	41.0007	PAX7 up vs OCT4	23.6644	71.0372	14.4016	131.517	145.61	4.15182	1
ENSG00000111727	9.87384e-06	1.46671e-06	700.577	700.577	MYOG up vs OCT4	113.126	4338.58	7.65881	18.9611	231.055	45.6965	1	3978	9.87384e-06	0.0015314	27.2498	27.2498	PAX7 up vs OCT4	4.4002	168.755	3.86341	18.9611	231.055	45.6965	1
ENSG00000111799	2.53493e-05	0.000691403	125009000000000	125009000000000	MYOG up vs OCT4	10858400	1.43918e+21	4.25523	16.2148	15710.4	3633.34	1	3993	2.53493e-05	1.03654e-05	2.95762e+21	2.95762e+21	PAX7 up vs OCT4	256902000000000	3.405e+28	6.48111	16.2148	15710.4	3633.34	1
ENSG00000111860	6.45188e-05	2.47703e-05	102.446	102.446	MYOG up vs OCT4	19.7284	531.988	5.99	13.812	137.366	37.2954	1	4006	6.45188e-05	4.082e-05	82.9273	82.9273	PAX7 up vs OCT4	15.9695	430.628	5.71649	13.812	137.366	37.2954	1
ENSG00000112182	0.000118092	0.00825214	2.17845	2.17845	MYOG up vs OCT4	1.26225	3.75966	3.04109	12.4081	13.5434	4.09313	1	4050	0.000118092	0.000108326	3.78351	3.78351	PAX7 up vs OCT4	2.19226	6.52975	5.19723	12.4081	13.5434	4.09313	1
ENSG00000112294	3.28816e-08	1.4172e-05	4.15652	4.15652	MYOG up vs OCT4	2.56734	6.72938	6.30261	45.4153	38.6398	3.19053	1	4074	3.28816e-08	7.17573e-08	9.0153	9.0153	PAX7 up vs OCT4	5.56846	14.5957	9.72778	45.4153	38.6398	3.19053	1
ENSG00000112319	3.87622e-11	8.65063e-11	80678.7	80678.7	MYOG up vs OCT4	17709.4	367549	15.881	117.747	992.333	31.6036	1	4084	3.87622e-11	3.90872e-10	25689.2	25689.2	PAX7 up vs OCT4	5638.9	117033	14.2724	117.747	992.333	31.6036	1
ENSG00000112406	3.86315e-05	4.25536e-05	291.909	291.909	MYOG up vs OCT4	34.8674	2443.85	5.69397	15.0943	249.79	62.0573	1	4097	3.86315e-05	0.003705	30.6184	30.6184	PAX7 up vs OCT4	3.65725	256.336	3.43216	15.0943	249.79	62.0573	1
ENSG00000112531	7.30933e-06	2.07262e-05	181287000	181287000	MYOG up vs OCT4	233087	140998000000	6.08897	19.9118	3233.56	608.979	1	4109	7.30933e-06	0.00983775	10174	10174	PAX7 up vs OCT4	13.0811	7912970	2.95476	19.9118	3233.56	608.979	1
ENSG00000112541	1.78369e-08	0.00440087	2.5252	2.5252	MYOG up vs OCT4	1.40024	4.55398	3.34828	49.6334	63.2549	4.77916	1	4111	1.78369e-08	6.92122e-09	24.7083	24.7083	PAX7 up vs OCT4	13.7009	44.5592	11.5925	49.6334	63.2549	4.77916	1
ENSG00000112576	5.34403e-06	3.3588e-06	2346.87	2346.87	MYOG up vs OCT4	231.834	23757.6	7.14606	20.943	411.303	73.6468	1	4115	5.34403e-06	1.94965e-05	772.692	772.692	PAX7 up vs OCT4	76.3297	7822.03	6.12311	20.943	411.303	73.6468	1
ENSG00000112584	0.000392264	3.91704e-05	90.4736	90.4736	MYOG up vs OCT4	16.9769	482.154	5.73887	9.93075	101.899	38.4785	1	4117	0.000392264	0.00136193	21.7136	21.7136	PAX7 up vs OCT4	4.07444	115.716	3.9209	9.93075	101.899	38.4785	1
ENSG00000112659	0.000396309	0.00351348	2.59148	2.59148	MYOG up vs OCT4	1.44094	4.66067	3.45803	9.91122	12.5139	4.73473	1	4126	0.000396309	0.000283733	3.64995	3.64995	PAX7 up vs OCT4	2.02948	6.56429	4.70176	9.91122	12.5139	4.73473	1
ENSG00000112763	0.00228457	0.001434	23.167	23.167	MYOG up vs OCT4	4.15044	129.314	3.89561	6.93185	75.1191	40.638	1	4140	0.00228457	0.00885527	11.307	11.307	PAX7 up vs OCT4	2.02569	63.1139	3.00647	6.93185	75.1191	40.638	1
ENSG00000112837	3.408e-08	7.17748e-09	23.6723	23.6723	MYOG up vs OCT4	13.2096	42.422	11.5615	45.1789	56.3511	4.67732	1	4149	3.408e-08	0.00141893	2.90845	2.90845	PAX7 up vs OCT4	1.62297	5.2121	3.90079	45.1789	56.3511	4.67732	1
ENSG00000112852	1.79995e-05	0.0135177	17.9343	17.9343	MYOG up vs OCT4	1.9889	161.717	2.79787	17.1727	304.39	66.4696	1	4151	1.79995e-05	5.82469e-06	1133.7	1133.7	PAX7 up vs OCT4	125.727	10222.8	6.81678	17.1727	304.39	66.4696	1
ENSG00000112992	5.4418e-05	0.000249906	207.282	207.282	MYOG up vs OCT4	19.0811	2251.74	4.76625	14.2281	296.722	78.2051	1	4165	5.4418e-05	9.60827e-06	1483.41	1483.41	PAX7 up vs OCT4	136.554	16114.5	6.52477	14.2281	296.722	78.2051	1
ENSG00000113108	6.23809e-06	0.00014571	4.03013	4.03013	MYOG up vs OCT4	2.23604	7.26368	5.04306	20.4283	25.9826	4.7696	1	4175	6.23809e-06	1.23765e-05	5.83103	5.83103	PAX7 up vs OCT4	3.23524	10.5095	6.37961	20.4283	25.9826	4.7696	1
ENSG00000113240	0.00193364	0.000837484	9.09816	9.09816	MYOG up vs OCT4	2.9353	28.2004	4.1603	7.18723	33.7115	17.5893	1	4188	0.00193364	0.00173912	7.51918	7.51918	PAX7 up vs OCT4	2.42588	23.3062	3.80116	7.18723	33.7115	17.5893	1
ENSG00000113441	0.000100187	0.000401922	5163.74	5163.74	MYOG up vs OCT4	92.1314	289415	4.52602	12.7789	759.231	222.798	1	4218	0.000100187	2.38402e-05	85376.4	85376.4	PAX7 up vs OCT4	1523.29	4785140	6.01119	12.7789	759.231	222.798	1
ENSG00000113448	3.43544e-05	5.46351e-05	21.9401	21.9401	MYOG up vs OCT4	6.7145	71.691	5.5594	15.4001	79.132	19.269	1	4219	3.43544e-05	1.03691e-05	36.6064	36.6064	PAX7 up vs OCT4	11.2029	119.614	6.4809	15.4001	79.132	19.269	1
ENSG00000113719	0.000985787	0.00937815	4.72831	4.72831	MYOG up vs OCT4	1.55541	14.3737	2.97829	8.27684	37.5	16.9902	1	4253	0.000985787	0.000170486	13.3076	13.3076	PAX7 up vs OCT4	4.37761	40.4539	4.962	8.27684	37.5	16.9902	1
ENSG00000113971	0.00249457	0.000504937	4.6153	4.6153	MYOG up vs OCT4	2.20446	9.6627	4.4117	6.79938	13.6058	7.5039	1	4278	0.00249457	0.00272513	3.46151	3.46151	PAX7 up vs OCT4	1.65336	7.24709	3.58187	6.79938	13.6058	7.5039	1
ENSG00000114019	1.89514e-09	4.83652e-10	6522780000000	6522780000000	MYOG up vs OCT4	74372800000	572073000000000	14.0572	68.3967	5017.75	275.109	1	4280	1.89514e-09	7.09537e-06	1283650	1283650	PAX7 up vs OCT4	14636.2	112581000	6.70084	68.3967	5017.75	275.109	1
ENSG00000114166	3.28688e-07	1.07756e-07	4.40373	4.40373	MYOG up vs OCT4	3.14975	6.15693	9.42855	32.2918	13.2924	1.54362	1	4296	3.28688e-07	5.59275e-05	2.39201	2.39201	PAX7 up vs OCT4	1.71088	3.34432	5.54687	32.2918	13.2924	1.54362	1
ENSG00000114200	1.22083e-06	3.03207e-05	26.3344	26.3344	MYOG up vs OCT4	8.04405	86.2127	5.87862	26.4269	136.227	19.3307	1	4297	1.22083e-06	1.58865e-07	162.492	162.492	PAX7 up vs OCT4	49.6345	531.962	9.14919	26.4269	136.227	19.3307	1
ENSG00000114315	6.49024e-06	0.000703273	14280200000	14280200000	MYOG up vs OCT4	114315	1783890000000000	4.24678	20.2981	10245.7	1892.86	1	4306	6.49024e-06	2.51484e-06	3.23445e+17	3.23445e+17	PAX7 up vs OCT4	2589210000000	4.0405e+22	7.32273	20.2981	10245.7	1892.86	1
ENSG00000114541	1.15437e-07	6.5027e-08	82.7565	82.7565	MYOG up vs OCT4	31.6771	216.201	9.80131	37.7611	127.631	12.6748	1	4333	1.15437e-07	0.000236996	8.6674	8.6674	PAX7 up vs OCT4	3.31767	22.6436	4.79327	37.7611	127.631	12.6748	1
ENSG00000114853	8.15174e-11	4.32043e-06	7.58343	7.58343	MYOG up vs OCT4	4.09014	14.0603	6.99439	106.24	148.419	5.23884	1	4369	8.15174e-11	2.61662e-06	8.2814	8.2814	PAX7 up vs OCT4	4.46659	15.3544	7.29836	106.24	148.419	5.23884	1
ENSG00000114861	0.000497152	0.00459063	3.45342	3.45342	MYOG up vs OCT4	1.56132	7.63849	3.3277	9.48624	21.9101	8.66126	1	4373	0.000497152	0.000674323	4.901	4.901	PAX7 up vs OCT4	2.21578	10.8403	4.26764	9.48624	21.9101	8.66126	1
ENSG00000115183	7.65297e-06	2.18151e-06	913.936	913.936	MYOG up vs OCT4	128.611	6494.63	7.41047	19.7641	278.553	52.8521	1	4410	7.65297e-06	3.28066e-06	726.063	726.063	PAX7 up vs OCT4	102.173	5159.56	7.16034	19.7641	278.553	52.8521	1
ENSG00000115274	4.41289e-05	0.000200576	5.75663	5.75663	MYOG up vs OCT4	2.67946	12.3677	4.87852	14.7533	31.6229	8.03793	1	4431	4.41289e-05	4.14432e-06	12.4093	12.4093	PAX7 up vs OCT4	5.77599	26.6605	7.01933	14.7533	31.6229	8.03793	1
ENSG00000115461	6.15588e-07	6.60551e-07	3.5906e+49	3.5906e+49	MYOG up vs OCT4	4.28819e+36	3.00648e+62	8.17343	29.3594	95276.8	12169.5	1	4466	6.15588e-07	7.33196e-06	3.24103e+40	3.24103e+40	PAX7 up vs OCT4	3.87071e+27	2.71378e+53	6.68167	29.3594	95276.8	12169.5	1
ENSG00000115486	0.0273596	0.00743354	4.60587	4.60587	MYOG up vs OCT4	1.60732	13.1984	3.09228	3.70343	15.0436	15.2328	1	4471	0.0273596	0.00394724	5.36536	5.36536	PAX7 up vs OCT4	1.87236	15.3747	3.4013	3.70343	15.0436	15.2328	1
ENSG00000115548	3.23932e-06	9.48835e-05	36.9045	36.9045	MYOG up vs OCT4	8.56782	158.96	5.26664	22.6832	177.292	29.31	1	4484	3.23932e-06	1.45571e-06	190.669	190.669	PAX7 up vs OCT4	44.266	821.275	7.66356	22.6832	177.292	29.31	1
ENSG00000115561	0.00299016	0.0034588	18.8792	18.8792	MYOG up vs OCT4	3.09907	115.01	3.46567	6.53109	78.1577	44.8763	1	4486	0.00299016	0.000835787	34.0486	34.0486	PAX7 up vs OCT4	5.58917	207.421	4.1613	6.53109	78.1577	44.8763	1
ENSG00000115935	0.000106375	0.00330486	2.10603	2.10603	MYOG up vs OCT4	1.33596	3.31998	3.48786	12.6428	9.59951	2.84732	1	4537	0.000106375	4.79625e-05	3.32712	3.32712	PAX7 up vs OCT4	2.11056	5.24493	5.62937	12.6428	9.59951	2.84732	1
ENSG00000116157	5.24311e-07	1.30351e-07	10244300	10244300	MYOG up vs OCT4	252449	415715000	9.2908	30.0863	1512.27	188.491	1	4574	5.24311e-07	2.63856e-05	31152.3	31152.3	PAX7 up vs OCT4	767.677	1264160	5.9551	30.0863	1512.27	188.491	1
ENSG00000116525	4.24209e-07	1.15098e-06	4.8326	4.8326	MYOG up vs OCT4	3.14434	7.42733	7.81294	31.0699	21.0341	2.53872	1	4612	4.24209e-07	0.00134273	2.20782	2.20782	PAX7 up vs OCT4	1.43652	3.39325	3.92787	31.0699	21.0341	2.53872	1
ENSG00000116539	2.69848e-06	0.000346958	15.5595	15.5595	MYOG up vs OCT4	4.36193	55.5026	4.60004	23.3476	138.401	22.2295	1	4613	2.69848e-06	4.9563e-05	28.4543	28.4543	PAX7 up vs OCT4	7.97683	101.5	5.61171	23.3476	138.401	22.2295	1
ENSG00000116584	4.3329e-08	1.04614e-08	207058	207058	MYOG up vs OCT4	20341.1	2107700	11.2442	43.6222	860.806	73.9994	1	4618	4.3329e-08	1.52239e-06	4072.36	4072.36	PAX7 up vs OCT4	400.064	41453.7	7.63529	43.6222	860.806	73.9994	1
ENSG00000116717	0.000798335	0.00868587	134.224	134.224	MYOG up vs OCT4	4.20765	4281.75	3.01595	8.63802	379.585	164.788	1	4641	0.000798335	9.94132e-05	4994.42	4994.42	PAX7 up vs OCT4	156.565	159322	5.24217	8.63802	379.585	164.788	1
ENSG00000116731	1.03466e-05	9.81067e-06	49.2184	49.2184	MYOG up vs OCT4	13.7512	176.163	6.51275	18.8166	112.137	22.348	1	4645	1.03466e-05	6.76004e-05	25.9957	25.9957	PAX7 up vs OCT4	7.26296	93.0441	5.44575	18.8166	112.137	22.348	1
ENSG00000116809	8.62361e-08	5.35052e-07	4.03922	4.03922	MYOG up vs OCT4	2.82386	5.77765	8.31301	39.4263	18.5144	1.76099	1	4661	8.62361e-08	1.74708e-08	6.15742	6.15742	PAX7 up vs OCT4	4.30471	8.8075	10.8235	39.4263	18.5144	1.76099	1
ENSG00000116874	2.83223e-06	0.000168135	6.34491	6.34491	MYOG up vs OCT4	2.87234	14.0157	4.96915	23.17	53.3388	8.63271	1	4671	2.83223e-06	3.537e-06	14.0898	14.0898	PAX7 up vs OCT4	6.37843	31.1238	7.11477	23.17	53.3388	8.63271	1
ENSG00000117069	1.85467e-09	3.44982e-09	20502	20502	MYOG up vs OCT4	3617.84	116183	12.1994	68.606	756.609	41.3562	1	4699	1.85467e-09	1.7934e-06	459.485	459.485	PAX7 up vs OCT4	81.0822	2603.86	7.53239	68.606	756.609	41.3562	1
ENSG00000117586	1.84793e-11	4.64729e-12	152.416	152.416	MYOG up vs OCT4	87.9171	264.235	19.4721	130.408	144.7	4.16099	1	4767	1.84793e-11	0.00665681	2.25285	2.25285	PAX7 up vs OCT4	1.29949	3.90562	3.14628	130.408	144.7	4.16099	1
ENSG00000117640	0.00252854	0.00366748	9.91543	9.91543	MYOG up vs OCT4	2.39041	41.1292	3.43712	6.77914	50.2857	27.8164	1	4782	0.00252854	0.00224685	11.6294	11.6294	PAX7 up vs OCT4	2.80361	48.2386	3.67601	6.77914	50.2857	27.8164	1
ENSG00000117707	6.38106e-12	9.83269e-12	7.70529	7.70529	MYOG up vs OCT4	6.08901	9.7506	18.4869	150.912	30.6552	0.76175	1	4789	6.38106e-12	1.94663e-09	4.07422	4.07422	PAX7 up vs OCT4	3.2196	5.15569	12.7176	150.912	30.6552	0.76175	1
ENSG00000118217	0.000706695	0.00298333	8.86226	8.86226	MYOG up vs OCT4	2.38045	32.9936	3.53774	8.85139	56.057	23.7492	1	4823	0.000706695	2.99107e-05	37.7159	37.7159	PAX7 up vs OCT4	10.1307	140.414	5.88609	8.85139	56.057	23.7492	1
ENSG00000118495	8.3208e-06	2.95143e-05	7.43444	7.43444	MYOG up vs OCT4	3.59871	15.3585	5.89341	19.4974	37.6181	7.23522	1	4852	8.3208e-06	5.24293e-07	17.0196	17.0196	PAX7 up vs OCT4	8.2385	35.1601	8.32655	19.4974	37.6181	7.23522	1
ENSG00000118689	6.02375e-06	6.56258e-07	156.512	156.512	MYOG up vs OCT4	41.9332	584.164	8.17773	20.5437	130.609	23.8411	1	4873	6.02375e-06	2.1409e-06	98.1234	98.1234	PAX7 up vs OCT4	26.2896	366.236	7.42211	20.5437	130.609	23.8411	1
ENSG00000118816	1.19237e-05	0.0010738	6240610000000	6240610000000	MYOG up vs OCT4	1098460	3.54544e+19	4.0377	18.3838	16298	3324.53	1	4884	1.19237e-05	3.21437e-05	3.37005e+18	3.37005e+18	PAX7 up vs OCT4	593189000000	1.9146e+25	5.84663	18.3838	16298	3324.53	1
ENSG00000118922	1.99219e-08	2.87163e-08	19.547	19.547	MYOG up vs OCT4	10.6459	35.8903	10.4278	48.8453	66.1016	5.07482	1	4892	1.99219e-08	3.01356e-08	19.3374	19.3374	PAX7 up vs OCT4	10.5318	35.5055	10.39	48.8453	66.1016	5.07482	1
ENSG00000118971	2.07185e-07	0.00163118	615435000000000	615435000000000	MYOG up vs OCT4	3665850	1.03321e+23	3.83251	34.6104	45498.7	4929.74	1	4898	2.07185e-07	1.80373e-08	4.64861e+41	4.64861e+41	PAX7 up vs OCT4	2.76895e+33	7.80423e+49	10.7978	34.6104	45498.7	4929.74	1
ENSG00000119242	0.00168844	0.000467054	4.74596	4.74596	MYOG up vs OCT4	2.25129	10.005	4.4507	7.39896	15.0832	7.64459	1	4918	0.00168844	0.000213464	5.4512	5.4512	PAX7 up vs OCT4	2.58583	11.4917	4.84665	7.39896	15.0832	7.64459	1
ENSG00000119321	0.00251552	0.00133551	2.43999	2.43999	MYOG up vs OCT4	1.50423	3.95787	3.93051	6.78686	5.82015	3.21585	1	4924	0.00251552	0.000263514	2.93157	2.93157	PAX7 up vs OCT4	1.80729	4.75526	4.73929	6.78686	5.82015	3.21585	1
ENSG00000119760	2.50386e-05	1.53403e-05	55.3572	55.3572	MYOG up vs OCT4	14.1071	217.226	6.25779	16.2486	111.308	25.6886	1	4994	2.50386e-05	0.000126451	26.6244	26.6244	PAX7 up vs OCT4	6.78487	104.476	5.11659	16.2486	111.308	25.6886	1
ENSG00000119771	4.22161e-05	0.00111509	2.10369	2.10369	MYOG up vs OCT4	1.41807	3.12082	4.01913	14.8662	8.4755	2.13794	1	4995	4.22161e-05	2.5396e-05	3.02173	3.02173	PAX7 up vs OCT4	2.0369	4.48272	5.9762	14.8662	8.4755	2.13794	1
ENSG00000119778	7.96745e-06	0.000913229	11.6219	11.6219	MYOG up vs OCT4	3.26463	41.3734	4.11753	19.6353	116.027	22.1592	1	4998	7.96745e-06	0.00114809	10.8669	10.8669	PAX7 up vs OCT4	3.05256	38.6857	4.00478	19.6353	116.027	22.1592	1
ENSG00000119820	0.000717442	0.000889839	10.0928	10.0928	MYOG up vs OCT4	3.06122	33.2757	4.13034	8.82479	46.0341	19.5617	1	5003	0.000717442	0.00464445	6.41979	6.41979	PAX7 up vs OCT4	1.94717	21.1659	3.32201	8.82479	46.0341	19.5617	1
ENSG00000119906	1.77017e-05	6.64479e-06	1.05797e+17	1.05797e+17	MYOG up vs OCT4	436602000000	2.56366e+22	6.73926	17.2205	9701.48	2112.63	1	5012	1.77017e-05	0.000564791	100803000000	100803000000	PAX7 up vs OCT4	415994	2.44265e+16	4.35581	17.2205	9701.48	2112.63	1
ENSG00000119950	4.78957e-06	3.07862e-06	35.6338	35.6338	MYOG up vs OCT4	12.3706	102.644	7.19897	21.3139	87.4378	15.3839	1	5024	4.78957e-06	1.00793e-06	50.4174	50.4174	PAX7 up vs OCT4	17.5029	145.228	7.89815	21.3139	87.4378	15.3839	1
ENSG00000120451	1.75139e-06	2.07917e-06	35.3338	35.3338	MYOG up vs OCT4	12.7254	98.1087	7.44026	24.9855	95.5059	14.3342	1	5089	1.75139e-06	7.0036e-05	13.4665	13.4665	PAX7 up vs OCT4	4.84994	37.3914	5.42695	24.9855	95.5059	14.3342	1
ENSG00000120616	2.09624e-05	0.000482438	4.75427	4.75427	MYOG up vs OCT4	2.2472	10.0583	4.43449	16.741	34.4549	7.71792	1	5105	2.09624e-05	1.53257e-05	9.02733	9.02733	PAX7 up vs OCT4	4.26695	19.0986	6.25833	16.741	34.4549	7.71792	1
ENSG00000120693	3.92898e-05	1.21943e-05	54682.8	54682.8	MYOG up vs OCT4	1435.53	2083000	6.38806	15.0507	730.889	182.107	1	5119	3.92898e-05	0.0027905	444.634	444.634	PAX7 up vs OCT4	11.6725	16937.2	3.57031	15.0507	730.889	182.107	1
ENSG00000120738	3.43806e-05	0.00187003	6.83611e+16	6.83611e+16	MYOG up vs OCT4	20227400	2.31035e+26	3.76567	15.3981	27168.9	6616.59	1	5131	3.43806e-05	1.53953e-05	9.27014e+27	9.27014e+27	PAX7 up vs OCT4	2.74295e+18	3.13296e+37	6.25577	15.3981	27168.9	6616.59	1
ENSG00000120832	1.3119e-05	2.33932e-06	592.255	592.255	MYOG up vs OCT4	93.4088	3755.17	7.36729	18.0969	226.259	46.8847	1	5140	1.3119e-05	0.00160522	27.876	27.876	PAX7 up vs OCT4	4.39652	176.747	3.84036	18.0969	226.259	46.8847	1
ENSG00000121210	4.51105e-11	5.47417e-07	115.48	115.48	MYOG up vs OCT4	34.0967	391.112	8.2978	115.306	628.908	20.4535	1	5180	4.51105e-11	1.82303e-09	1500.24	1500.24	PAX7 up vs OCT4	442.961	5081.06	12.7782	115.306	628.908	20.4535	1
ENSG00000121297	5.8461e-09	0.000348881	30.5251	30.5251	MYOG up vs OCT4	6.25629	148.935	4.59725	58.2698	536.501	34.527	1	5187	5.8461e-09	9.41147e-10	21293.5	21293.5	PAX7 up vs OCT4	4364.22	103893	13.4024	58.2698	536.501	34.527	1
ENSG00000121440	3.4336e-11	1.46271e-12	246884	246884	MYOG up vs OCT4	70379.8	866042	21.0878	119.735	691.205	21.648	1	5205	3.4336e-11	2.05541e-08	542.414	542.414	PAX7 up vs OCT4	154.627	1902.73	10.6928	119.735	691.205	21.648	1
ENSG00000121879	8.14672e-05	0.00266461	6.36672	6.36672	MYOG up vs OCT4	2.1232	19.0915	3.59282	13.257	58.5956	16.5749	1	5244	8.14672e-05	1.73414e-05	24.2531	24.2531	PAX7 up vs OCT4	8.08804	72.7266	6.18874	13.257	58.5956	16.5749	1
ENSG00000121957	3.28207e-05	1.02473e-05	55.2231	55.2231	MYOG up vs OCT4	14.7832	206.287	6.48769	15.5205	98.7987	23.8714	1	5256	3.28207e-05	0.000429634	16.0831	16.0831	PAX7 up vs OCT4	4.30545	60.0789	4.49255	15.5205	98.7987	23.8714	1
ENSG00000121964	2.04778e-05	9.01385e-05	4.90465	4.90465	MYOG up vs OCT4	2.58546	9.30419	5.2936	16.8067	25.2531	5.63459	1	5257	2.04778e-05	0.00065897	3.6162	3.6162	PAX7 up vs OCT4	1.90626	6.85999	4.27908	16.8067	25.2531	5.63459	1
ENSG00000121989	1.71313e-05	5.06992e-05	7.66599e+17	7.66599e+17	MYOG up vs OCT4	119353000000	4.92384e+24	5.59952	17.3146	15593.3	3377.2	1	5260	1.71313e-05	8.1023e-05	1.22166e+17	1.22166e+17	PAX7 up vs OCT4	19020200000	7.84671e+23	5.34979	17.3146	15593.3	3377.2	1
ENSG00000122008	0.0173245	0.00529901	4.70225	4.70225	MYOG up vs OCT4	1.70777	12.9474	3.2577	4.22566	15.8882	14.0998	1	5261	0.0173245	0.00260077	5.54505	5.54505	PAX7 up vs OCT4	2.01386	15.268	3.60464	4.22566	15.8882	14.0998	1
ENSG00000122068	0.000325048	0.000447347	317.178	317.178	MYOG up vs OCT4	20.3802	4936.27	4.47229	10.2933	284.248	103.556	1	5270	0.000325048	0.000254133	458.078	458.078	PAX7 up vs OCT4	29.4336	7129.11	4.75772	10.2933	284.248	103.556	1
ENSG00000122592	3.38747e-05	4.47472e-05	28.1449	28.1449	MYOG up vs OCT4	8.02116	98.7554	5.6668	15.4371	89.1533	21.6572	1	5326	3.38747e-05	5.93326e-06	55.0483	55.0483	PAX7 up vs OCT4	15.6885	193.155	6.80588	15.4371	89.1533	21.6572	1
ENSG00000122694	0.000231591	9.33608e-05	5270010	5270010	MYOG up vs OCT4	10135	2740300000	5.27514	10.9702	1572.5	537.535	1	5337	0.000231591	0.00541743	13720.3	13720.3	PAX7 up vs OCT4	26.3862	7134280	3.24692	10.9702	1572.5	537.535	1
ENSG00000122877	5.63766e-06	3.4458e-06	198331	198331	MYOG up vs OCT4	5175	7601000	7.13057	20.7638	1011.7	182.716	1	5363	5.63766e-06	0.000364569	2505.44	2505.44	PAX7 up vs OCT4	65.3739	96020.7	4.57508	20.7638	1011.7	182.716	1
ENSG00000123096	1.06567e-10	1.74964e-05	16.6217	16.6217	MYOG up vs OCT4	6.3085	43.7952	6.18374	102.363	352.139	12.9003	1	5381	1.06567e-10	0.000200041	9.18959	9.18959	PAX7 up vs OCT4	3.48775	24.2129	4.87989	102.363	352.139	12.9003	1
ENSG00000123358	0.000504584	0.00127246	217.538	217.538	MYOG up vs OCT4	11.9547	3958.51	3.95425	9.45886	291.808	115.688	1	5414	0.000504584	0.000325388	547.57	547.57	PAX7 up vs OCT4	30.0915	9964.05	4.63243	9.45886	291.808	115.688	1
ENSG00000123572	2.50462e-07	0.000485745	4685290000000	4685290000000	MYOG up vs OCT4	3765430	5.82986e+18	4.43107	33.6401	24283.6	2707	1	5444	2.50462e-07	1.19564e-07	5.56476e+26	5.56476e+26	PAX7 up vs OCT4	4.47224e+20	6.92418e+32	9.35313	33.6401	24283.6	2707	1
ENSG00000123933	0.000311701	0.0105223	3.70687	3.70687	MYOG up vs OCT4	1.42526	9.64092	2.92165	10.3754	34.742	12.5569	1	5473	0.000311701	1.41347e-05	16.895	16.895	PAX7 up vs OCT4	6.49601	43.941	6.3041	10.3754	34.742	12.5569	1
ENSG00000124006	2.53232e-08	4.53525e-09	1978350000	1978350000	MYOG up vs OCT4	43578900	89811100000	11.9579	47.1746	2517.03	200.083	1	5482	2.53232e-08	0.00571244	319.218	319.218	PAX7 up vs OCT4	7.03171	14491.5	3.22103	47.1746	2517.03	200.083	1
ENSG00000124098	0.00811074	0.00440936	63.1265	63.1265	MYOG up vs OCT4	4.50723	884.127	3.34734	5.15974	131.749	95.7525	1	5490	0.00811074	0.000701197	192.632	192.632	PAX7 up vs OCT4	13.7539	2697.93	4.24825	5.15974	131.749	95.7525	1
ENSG00000124205	9.48761e-07	0.00100721	8703960000	8703960000	MYOG up vs OCT4	54115.4	1399950000000000	4.06923	27.4758	14472.5	1975.27	1	5519	9.48761e-07	4.52977e-07	3.7844e+20	3.7844e+20	PAX7 up vs OCT4	2352880000000000	6.08685e+25	8.42444	27.4758	14472.5	1975.27	1
ENSG00000124209	1.49479e-05	0.000957159	3.44147	3.44147	MYOG up vs OCT4	1.80852	6.54883	4.09435	17.7108	26.8704	5.68939	1	5522	1.49479e-05	4.12307e-06	8.32904	8.32904	PAX7 up vs OCT4	4.37699	15.8495	7.02241	17.7108	26.8704	5.68939	1
ENSG00000124535	6.49389e-07	1.36934e-07	4193800	4193800	MYOG up vs OCT4	125161	140523000	9.25538	29.1207	1316.26	169.5	1	5581	6.49389e-07	4.96985e-05	10336.1	10336.1	PAX7 up vs OCT4	308.472	346334	5.61024	29.1207	1316.26	169.5	1
ENSG00000124749	0.00275553	0.000531598	151.976	151.976	MYOG up vs OCT4	13.2284	1745.99	4.38601	6.65131	145.297	81.9185	1	5618	0.00275553	0.00584019	39.5272	39.5272	PAX7 up vs OCT4	3.44056	454.113	3.21023	6.65131	145.297	81.9185	1
ENSG00000124782	0.000348422	0.000333887	7.64332	7.64332	MYOG up vs OCT4	2.99037	19.5361	4.61941	10.1583	32.7882	12.104	1	5624	0.000348422	0.00489155	4.26945	4.26945	PAX7 up vs OCT4	1.67038	10.9126	3.29673	10.1583	32.7882	12.104	1
ENSG00000125388	4.98578e-08	6.36302e-09	3.36551	3.36551	MYOG up vs OCT4	2.69614	4.20106	11.6645	42.7351	7.70248	0.675892	1	5685	4.98578e-08	1.70235e-08	3.09031	3.09031	PAX7 up vs OCT4	2.47567	3.85753	10.8445	42.7351	7.70248	0.675892	1
ENSG00000125812	0.00371417	0.000546556	5.83446	5.83446	MYOG up vs OCT4	2.46929	13.7857	4.37217	6.21814	16.8499	10.1617	1	5759	0.00371417	0.00458728	3.82889	3.82889	PAX7 up vs OCT4	1.62048	9.04693	3.32805	6.21814	16.8499	10.1617	1
ENSG00000125843	4.50714e-06	0.00758216	2.88591	2.88591	MYOG up vs OCT4	1.38682	6.00543	3.08258	21.5221	42.3617	7.38109	1	5775	4.50714e-06	0.00104605	4.02552	4.02552	PAX7 up vs OCT4	1.93446	8.37691	4.05059	21.5221	42.3617	7.38109	1
ENSG00000125875	0.00314741	0.000727195	15.4472	15.4472	MYOG up vs OCT4	3.88893	61.3579	4.2302	6.45633	45.0183	26.1478	1	5790	0.00314741	0.00455904	8.63293	8.63293	PAX7 up vs OCT4	2.17339	34.2909	3.33106	6.45633	45.0183	26.1478	1
ENSG00000125931	1.81054e-06	9.5558e-06	2049900	2049900	MYOG up vs OCT4	17818.6	235827000	6.52793	24.8563	2051.41	309.491	1	5804	1.81054e-06	3.4023e-06	7977330	7977330	PAX7 up vs OCT4	69342.3	917734000	7.13827	24.8563	2051.41	309.491	1
ENSG00000125945	3.05744e-06	5.18725e-07	463.307	463.307	MYOG up vs OCT4	96.3911	2226.9	8.33367	22.8916	206.8	33.8771	1	5806	3.05744e-06	2.16716e-06	235.425	235.425	PAX7 up vs OCT4	48.9802	1131.58	7.41456	22.8916	206.8	33.8771	1
ENSG00000125952	0.00274484	0.0042908	3.131	3.131	MYOG up vs OCT4	1.5181	6.45754	3.36062	6.65706	12.7856	7.20229	1	5807	0.00274484	0.000251439	5.0414	5.0414	PAX7 up vs OCT4	2.44438	10.3976	4.76314	6.65706	12.7856	7.20229	1
ENSG00000126070	3.69964e-06	6.26835e-05	3.63171	3.63171	MYOG up vs OCT4	2.20035	5.9942	5.48595	22.21	20.4392	3.45102	1	5831	3.69964e-06	3.67902e-06	5.29645	5.29645	PAX7 up vs OCT4	3.20897	8.74186	7.09099	22.21	20.4392	3.45102	1
ENSG00000126778	3.50231e-06	0.000114337	291069	291069	MYOG up vs OCT4	1625.24	52128200	5.16903	22.4042	2210.05	369.917	1	5898	3.50231e-06	1.37421e-06	137857000	137857000	PAX7 up vs OCT4	769754	24689200000	7.70004	22.4042	2210.05	369.917	1
ENSG00000127152	1.90814e-11	5.42697e-05	2.58332	2.58332	MYOG up vs OCT4	1.79578	3.71623	5.56299	129.834	62.9231	1.81741	1	5936	1.90814e-11	8.30892e-11	15.1359	15.1359	PAX7 up vs OCT4	10.5216	21.7737	15.9261	129.834	62.9231	1.81741	1
ENSG00000127418	6.40965e-07	9.8016e-08	13696.6	13696.6	MYOG up vs OCT4	1615.4	116130	9.49766	29.1789	488.647	62.7997	1	5959	6.40965e-07	6.06529e-06	909.04	909.04	PAX7 up vs OCT4	107.214	7707.51	6.79291	29.1789	488.647	62.7997	1
ENSG00000127419	0.0023313	0.000534755	2.55926	2.55926	MYOG up vs OCT4	1.62051	4.04182	4.38306	6.90122	5.28208	2.87019	1	5960	0.0023313	0.00243726	2.18064	2.18064	PAX7 up vs OCT4	1.38077	3.44387	3.63632	6.90122	5.28208	2.87019	1
ENSG00000127452	0.00126829	0.00179393	6.65275	6.65275	MYOG up vs OCT4	2.2891	19.3347	3.78598	7.85812	32.7818	15.6439	1	5963	0.00126829	0.00537538	5.08915	5.08915	PAX7 up vs OCT4	1.75109	14.7905	3.25072	7.85812	32.7818	15.6439	1
ENSG00000127528	4.80782e-05	1.91476e-05	30.7609	30.7609	MYOG up vs OCT4	9.35148	101.185	6.13321	14.5367	75.5383	19.4864	1	5973	4.80782e-05	0.000522275	11.6479	11.6479	PAX7 up vs OCT4	3.54103	38.3148	4.39484	14.5367	75.5383	19.4864	1
ENSG00000127914	1.26226e-08	3.37117e-09	20446800	20446800	MYOG up vs OCT4	1085120	385278000	12.2199	52.1746	1648.54	118.487	1	6004	1.26226e-08	0.00343175	119.025	119.025	PAX7 up vs OCT4	6.31672	2242.78	3.4695	52.1746	1648.54	118.487	1
ENSG00000128607	9.83612e-07	5.41037e-05	52.5038	52.5038	MYOG up vs OCT4	11.5159	239.378	5.56464	27.3236	230.509	31.636	1	6093	9.83612e-07	4.71648e-06	139.948	139.948	PAX7 up vs OCT4	30.6955	638.059	6.94198	27.3236	230.509	31.636	1
ENSG00000128709	1.18094e-07	2.24935e-05	22.2206	22.2206	MYOG up vs OCT4	7.44339	66.3346	6.04344	37.6339	164.99	16.4403	1	6109	1.18094e-07	5.19153e-08	166.722	166.722	PAX7 up vs OCT4	55.8481	497.711	9.97099	37.6339	164.99	16.4403	1
ENSG00000128881	0.001081	0.00304957	15.4282	15.4282	MYOG up vs OCT4	2.95254	80.6187	3.52704	8.12204	81.3916	37.579	1	6124	0.001081	0.00665683	11.4824	11.4824	PAX7 up vs OCT4	2.19742	60.0001	3.14628	8.12204	81.3916	37.579	1
ENSG00000129116	1.48512e-08	6.92595e-09	11230700	11230700	MYOG up vs OCT4	567576	222225000	11.5919	50.965	1664.41	122.467	1	6149	1.48512e-08	1.65391e-05	6029.72	6029.72	PAX7 up vs OCT4	304.728	119311	6.21537	50.965	1664.41	122.467	1
ENSG00000129152	1.44906e-09	4.6697e-10	2.8729e+38	2.8729e+38	MYOG up vs OCT4	4.38109e+32	1.8839e+44	14.0924	71.042	46708.4	2465.53	1	6152	1.44906e-09	3.67534e-05	5700160000000000	5700160000000000	PAX7 up vs OCT4	8692590000	3.73788e+21	5.77349	71.042	46708.4	2465.53	1
ENSG00000129292	1.38371e-07	2.93429e-07	7.23466	7.23466	MYOG up vs OCT4	4.46008	11.7353	8.71974	36.7586	31.5232	3.21591	1	6175	1.38371e-07	1.59433e-07	7.97066	7.97066	PAX7 up vs OCT4	4.91381	12.9292	9.14665	36.7586	31.5232	3.21591	1
ENSG00000129596	1.03841e-06	3.95777e-05	3541.39	3541.39	MYOG up vs OCT4	169.707	73900.7	5.73325	27.0961	916.705	126.869	1	6209	1.03841e-06	6.32427e-05	2472.58	2472.58	PAX7 up vs OCT4	118.488	51597	5.48122	27.0961	916.705	126.869	1
ENSG00000129757	1.50064e-06	6.15824e-07	7.58943e+27	7.58943e+27	MYOG up vs OCT4	4.47297e+20	1.28772e+35	8.2197	25.5942	25995.1	3808.74	1	6224	1.50064e-06	8.24353e-05	1.30285e+18	1.30285e+18	PAX7 up vs OCT4	76785700000	2.21059e+25	5.34067	25.5942	25995.1	3808.74	1
ENSG00000129910	6.726e-08	1.71863e-08	2.73405e+20	2.73405e+20	MYOG up vs OCT4	2.61318e+16	2.8605e+24	10.8368	40.8972	12840.7	1177.4	1	6232	6.726e-08	4.01729e-05	62646900000	62646900000	PAX7 up vs OCT4	5987750	655445000000000	5.72516	40.8972	12840.7	1177.4	1
ENSG00000129946	1.24069e-05	4.51751e-05	71.6726	71.6726	MYOG up vs OCT4	14.3505	357.964	5.66166	18.2641	173.155	35.5523	1	6237	1.24069e-05	4.14323e-06	199.674	199.674	PAX7 up vs OCT4	39.9792	997.258	7.01949	18.2641	173.155	35.5523	1
ENSG00000130005	5.6638e-06	6.73493e-07	268595	268595	MYOG up vs OCT4	10258.7	7032400	8.16065	20.7484	810.7	146.523	1	6245	5.6638e-06	0.00755522	112.702	112.702	PAX7 up vs OCT4	4.30455	2950.79	3.08433	20.7484	810.7	146.523	1
ENSG00000130032	4.23012e-07	1.76554e-05	6.73639	6.73639	MYOG up vs OCT4	3.48855	13.008	6.17866	31.0832	49.3306	5.95143	1	6249	4.23012e-07	1.17699e-05	7.23127	7.23127	PAX7 up vs OCT4	3.74484	13.9636	6.40829	31.0832	49.3306	5.95143	1
ENSG00000130338	3.00352e-06	6.55635e-07	280079	280079	MYOG up vs OCT4	10656.3	7361330	8.17835	22.9561	899.076	146.869	1	6300	3.00352e-06	0.00598786	134.924	134.924	PAX7 up vs OCT4	5.13349	3546.2	3.19804	22.9561	899.076	146.869	1
ENSG00000130449	6.6461e-06	5.38972e-07	256.697	256.697	MYOG up vs OCT4	61.8424	1065.51	8.30815	20.2205	150.134	27.8432	1	6318	6.6461e-06	0.000241246	24.4036	24.4036	PAX7 up vs OCT4	5.87922	101.295	4.78421	20.2205	150.134	27.8432	1
ENSG00000130600	4.70155e-07	6.76294e-05	8.98847e+307	8.98847e+307	MYOG up vs OCT4	4.88294e+192	8.98847e+307	5.44552	30.589	9129020	1119150	1	6347	4.70155e-07	1.97449e-08	8.98847e+307	8.98847e+307	PAX7 up vs OCT4	8.98847e+307	8.98847e+307	10.725	30.589	9129020	1119150	1
ENSG00000130684	2.56827e-05	4.29454e-05	32.4473	32.4473	MYOG up vs OCT4	8.81046	119.497	5.68901	16.1791	100.782	23.3593	1	6358	2.56827e-05	7.09436e-05	27.5265	27.5265	PAX7 up vs OCT4	7.47432	101.375	5.42011	16.1791	100.782	23.3593	1
ENSG00000130787	8.15999e-09	3.10738e-07	16.4401	16.4401	MYOG up vs OCT4	8.26688	32.6941	8.68036	55.5522	96.2266	6.49569	1	6394	8.15999e-09	1.85711e-06	11.2732	11.2732	PAX7 up vs OCT4	5.6687	22.4187	7.51058	55.5522	96.2266	6.49569	1
ENSG00000130956	0.016394	0.00405621	7.02623	7.02623	MYOG up vs OCT4	2.06081	23.9555	3.38803	4.29071	23.6585	20.6771	1	6419	0.016394	0.00436134	6.88473	6.88473	PAX7 up vs OCT4	2.01931	23.4731	3.35268	4.29071	23.6585	20.6771	1
ENSG00000131018	3.81976e-08	2.12998e-05	9.14194	9.14194	MYOG up vs OCT4	4.20517	19.8743	6.07377	44.4332	98.2073	8.28833	1	6431	3.81976e-08	1.75412e-05	9.51069	9.51069	PAX7 up vs OCT4	4.37479	20.676	6.1823	44.4332	98.2073	8.28833	1
ENSG00000131069	5.7449e-05	2.83917e-05	19.2528	19.2528	MYOG up vs OCT4	6.63148	55.8958	5.91473	14.0946	58.6839	15.6134	1	6445	5.7449e-05	9.82325e-05	13.7974	13.7974	PAX7 up vs OCT4	4.7524	40.0573	5.24844	14.0946	58.6839	15.6134	1
ENSG00000131375	0.00949322	0.00504038	14.517	14.517	MYOG up vs OCT4	2.55469	82.493	3.28212	4.95876	54.8601	41.4873	1	6485	0.00949322	0.00733999	12.4989	12.4989	PAX7 up vs OCT4	2.19954	71.0247	3.09848	4.95876	54.8601	41.4873	1
ENSG00000131759	1.12401e-05	1.69818e-06	20302.2	20302.2	MYOG up vs OCT4	1242.04	331856	7.56656	18.5629	531.104	107.291	1	6542	1.12401e-05	0.000396592	380.559	380.559	PAX7 up vs OCT4	23.2817	6220.54	4.53272	18.5629	531.104	107.291	1
ENSG00000131779	0.0136074	0.00407863	7.92082	7.92082	MYOG up vs OCT4	2.15226	29.1505	3.38534	4.5135	28.0851	23.3343	1	6546	0.0136074	0.00159345	10.4841	10.4841	PAX7 up vs OCT4	2.84874	38.5838	3.84396	4.5135	28.0851	23.3343	1
ENSG00000132128	0.000562229	0.000233928	24.5466	24.5466	MYOG up vs OCT4	5.92586	101.679	4.79991	9.26087	68.5614	27.7626	1	6590	0.000562229	0.000153924	28.3264	28.3264	PAX7 up vs OCT4	6.83835	117.336	5.0147	9.26087	68.5614	27.7626	1
ENSG00000132275	3.0929e-05	1.77716e-05	4.25837	4.25837	MYOG up vs OCT4	2.58252	7.0217	6.17498	15.6779	14.3723	3.43769	1	6610	3.0929e-05	0.000136057	3.29242	3.29242	PAX7 up vs OCT4	1.99672	5.42894	5.07856	15.6779	14.3723	3.43769	1
ENSG00000132323	2.8024e-05	0.000796852	4.93021	4.93021	MYOG up vs OCT4	2.18764	11.1111	4.1849	15.9424	38.5791	9.07466	1	6618	2.8024e-05	0.00071553	5.03145	5.03145	PAX7 up vs OCT4	2.23256	11.3392	4.23822	15.9424	38.5791	9.07466	1
ENSG00000132613	3.51953e-08	8.25378e-09	16717800000000	16717800000000	MYOG up vs OCT4	57562800000	4855300000000000	11.443	44.9673	5301.01	442.072	1	6677	3.51953e-08	3.97459e-06	138147000	138147000	PAX7 up vs OCT4	475667	40121500000	7.04444	44.9673	5301.01	442.072	1
ENSG00000132639	0.00191989	0.0135659	2.92553	2.92553	MYOG up vs OCT4	1.29069	6.63117	2.7961	7.19828	17.6663	9.20342	1	6682	0.00191989	7.96316e-05	7.82559	7.82559	PAX7 up vs OCT4	3.45249	17.7379	5.35894	7.19828	17.6663	9.20342	1
ENSG00000132854	7.23993e-06	3.30591e-05	96.224	96.224	MYOG up vs OCT4	18.1281	510.757	5.83127	19.9426	203.655	38.2952	1	6727	7.23993e-06	3.24455e-05	96.9991	96.9991	PAX7 up vs OCT4	18.2741	514.871	5.84152	19.9426	203.655	38.2952	1
ENSG00000133030	1.64416e-06	5.34464e-05	14.7465	14.7465	MYOG up vs OCT4	5.26704	41.2867	5.57119	25.2329	98.0255	14.5681	1	6755	1.64416e-06	1.57032e-07	83.3667	83.3667	PAX7 up vs OCT4	29.7763	233.407	9.15746	25.2329	98.0255	14.5681	1
ENSG00000133121	5.36815e-06	1.2553e-06	74715.8	74715.8	MYOG up vs OCT4	3422.97	1630880	7.75755	20.9279	729.142	130.653	1	6778	5.36815e-06	0.00168595	249.739	249.739	PAX7 up vs OCT4	11.4413	5451.23	3.81634	20.9279	729.142	130.653	1
ENSG00000133315	0.000366509	2.54018e-05	187.367	187.367	MYOG up vs OCT4	28.9805	1211.38	5.97608	10.0607	128.454	47.8797	1	6801	0.000366509	0.00162683	28.7074	28.7074	PAX7 up vs OCT4	4.44024	185.601	3.83381	10.0607	128.454	47.8797	1
ENSG00000133612	2.43796e-05	1.39429e-05	4.38355	4.38355	MYOG up vs OCT4	2.66126	7.22046	6.31184	16.3218	14.8991	3.42314	1	6825	2.43796e-05	0.000207248	3.12158	3.12158	PAX7 up vs OCT4	1.89511	5.14177	4.86177	16.3218	14.8991	3.42314	1
ENSG00000133639	0.000195339	0.00010031	40693600	40693600	MYOG up vs OCT4	32564.1	50852800000	5.23747	11.3217	2109.86	698.835	1	6830	0.000195339	0.00232815	206861	206861	PAX7 up vs OCT4	165.535	258503000	3.65866	11.3217	2109.86	698.835	1
ENSG00000133687	6.27331e-08	2.26229e-07	2469.67	2469.67	MYOG up vs OCT4	380.312	16037.5	8.9	41.3184	530.04	48.1057	1	6837	6.27331e-08	4.37477e-07	1660.67	1660.67	PAX7 up vs OCT4	255.732	10784	8.44786	41.3184	530.04	48.1057	1
ENSG00000134030	2.70126e-10	2.70456e-11	53.6488	53.6488	MYOG up vs OCT4	32.7792	87.8056	17.2296	89.9334	80.0046	3.33599	1	6879	2.70126e-10	8.3838e-07	6.37986	6.37986	PAX7 up vs OCT4	3.89807	10.4418	8.01738	89.9334	80.0046	3.33599	1
ENSG00000134202	5.28704e-06	1.16585e-06	260541	260541	MYOG up vs OCT4	8645.98	7851220	7.80472	20.9791	891.823	159.413	1	6908	5.28704e-06	0.00366658	242.762	242.762	PAX7 up vs OCT4	8.056	7315.47	3.43724	20.9791	891.823	159.413	1
ENSG00000134590	5.90771e-12	4.50321e-10	1180930000000000	1180930000000000	MYOG up vs OCT4	6287580000000	2.21803e+17	14.129	152.514	15321.9	376.733	1	6986	5.90771e-12	1.58727e-07	5762910000	5762910000	PAX7 up vs OCT4	30683100	1082390000000	9.14981	152.514	15321.9	376.733	1
ENSG00000134686	0.000408384	0.00636303	87.9264	87.9264	MYOG up vs OCT4	4.32759	1786.46	3.16834	9.85423	327.547	124.647	1	6997	0.000408384	0.000105305	1578.1	1578.1	PAX7 up vs OCT4	77.6716	32063.3	5.21202	9.85423	327.547	124.647	1
ENSG00000134982	0.000294571	0.0022988	9.63861	9.63861	MYOG up vs OCT4	2.58059	36.0006	3.66485	10.4868	66.7426	23.8667	1	7048	0.000294571	0.00280305	9.0791	9.0791	PAX7 up vs OCT4	2.43079	33.9108	3.56812	10.4868	66.7426	23.8667	1
ENSG00000135093	5.69984e-10	1.54611e-09	4.05521	4.05521	MYOG up vs OCT4	3.21955	5.10775	12.9314	81.0117	15.8107	0.731873	1	7068	5.69984e-10	1.94272e-09	3.96323	3.96323	PAX7 up vs OCT4	3.14653	4.9919	12.7195	81.0117	15.8107	0.731873	1
ENSG00000135250	0.000450009	0.00955686	4.75732	4.75732	MYOG up vs OCT4	1.55269	14.5761	2.96901	9.67145	44.4408	17.2314	1	7095	0.000450009	0.000944058	8.62291	8.62291	PAX7 up vs OCT4	2.81433	26.42	4.10115	9.67145	44.4408	17.2314	1
ENSG00000135439	3.72981e-06	2.20981e-06	9.47089	9.47089	MYOG up vs OCT4	4.95738	18.0938	7.40249	22.1813	34.0682	5.75961	1	7137	3.72981e-06	0.00286368	2.94619	2.94619	PAX7 up vs OCT4	1.54213	5.62859	3.55769	22.1813	34.0682	5.75961	1
ENSG00000135678	9.28598e-05	0.00168441	7.11148	7.11148	MYOG up vs OCT4	2.37789	21.2681	3.81679	12.9529	56.9745	16.4947	1	7186	9.28598e-05	9.12676e-05	15.1406	15.1406	PAX7 up vs OCT4	5.06261	45.2805	5.28706	12.9529	56.9745	16.4947	1
ENSG00000135837	3.40744e-11	3.41028e-10	596.829	596.829	MYOG up vs OCT4	231.905	1536	14.4117	119.862	392.564	12.2818	1	7215	3.40744e-11	4.85282e-05	12.1077	12.1077	PAX7 up vs OCT4	4.70458	31.1602	5.62306	119.862	392.564	12.2818	1
ENSG00000136141	0.000108008	2.12297e-05	74.3121	74.3121	MYOG up vs OCT4	16.3928	336.873	6.0756	12.6084	105.567	31.3977	1	7278	0.000108008	0.00187066	14.4423	14.4423	PAX7 up vs OCT4	3.18587	65.47	3.7655	12.6084	105.567	31.3977	1
ENSG00000136279	0.000154937	0.0120183	3.56191	3.56191	MYOG up vs OCT4	1.38028	9.19175	2.85606	11.8129	38.9111	12.3522	1	7315	0.000154937	0.000319346	7.88207	7.88207	PAX7 up vs OCT4	3.05439	20.3402	4.6419	11.8129	38.9111	12.3522	1
ENSG00000136870	0.000299103	0.000111146	751.355	751.355	MYOG up vs OCT4	49.3594	11437.2	5.1838	10.4566	284.116	101.891	1	7418	0.000299103	0.00687182	54.5573	54.5573	PAX7 up vs OCT4	3.58408	830.478	3.13073	10.4566	284.116	101.891	1
ENSG00000136878	9.78976e-05	0.000682029	6.26244	6.26244	MYOG up vs OCT4	2.502	15.6747	4.262	12.8317	39.588	11.5694	1	7423	9.78976e-05	0.00142213	5.35811	5.35811	PAX7 up vs OCT4	2.1407	13.4112	3.89969	12.8317	39.588	11.5694	1
ENSG00000136925	8.58023e-07	0.0111997	2.1676	2.1676	MYOG up vs OCT4	1.22536	3.8344	2.89089	27.9039	33.2735	4.47162	1	7432	8.58023e-07	0.00020918	3.66846	3.66846	PAX7 up vs OCT4	2.0738	6.48935	4.85702	27.9039	33.2735	4.47162	1
ENSG00000136935	0.000428578	0.000134401	2.36563	2.36563	MYOG up vs OCT4	1.64892	3.39387	5.08491	9.76305	4.66132	1.79042	1	7439	0.000428578	0.000101289	2.42545	2.42545	PAX7 up vs OCT4	1.69061	3.47968	5.23238	9.76305	4.66132	1.79042	1
ENSG00000136936	4.84718e-06	1.88641e-05	11.9748	11.9748	MYOG up vs OCT4	5.05883	28.3455	6.14155	21.2732	57.8894	10.2047	1	7440	4.84718e-06	4.89262e-07	29.5119	29.5119	PAX7 up vs OCT4	12.4675	69.8577	8.37275	21.2732	57.8894	10.2047	1
ENSG00000137070	5.39319e-05	2.05718e-05	182.424	182.424	MYOG up vs OCT4	29.5209	1127.28	6.09314	14.2503	173.238	45.5881	1	7459	5.39319e-05	0.000138643	76.0262	76.0262	PAX7 up vs OCT4	12.303	469.802	5.0688	14.2503	173.238	45.5881	1
ENSG00000137218	5.16214e-06	2.17142e-06	3.50995	3.50995	MYOG up vs OCT4	2.44635	5.03597	7.41334	21.0597	10.0593	1.79121	1	7494	5.16214e-06	0.000824377	2.02578	2.02578	PAX7 up vs OCT4	1.41192	2.90652	4.1681	21.0597	10.0593	1.79121	1
ENSG00000137478	1.81125e-06	8.51433e-07	146.769	146.769	MYOG up vs OCT4	38.8958	553.813	8.00733	24.8548	160.648	24.238	1	7535	1.81125e-06	0.000226132	20.1115	20.1115	PAX7 up vs OCT4	5.32985	75.8883	4.8172	24.8548	160.648	24.238	1
ENSG00000137497	2.08268e-07	0.00393112	52.0346	52.0346	MYOG up vs OCT4	4.37921	618.286	3.40329	34.5834	776.464	84.1948	1	7541	2.08268e-07	4.91351e-06	3080.13	3080.13	PAX7 up vs OCT4	259.222	36598.7	6.9176	34.5834	776.464	84.1948	1
ENSG00000137764	2.65757e-09	0.00609668	2.08706	2.08706	MYOG up vs OCT4	1.27639	3.41263	3.18924	65.1958	57.777	3.32328	1	7587	2.65757e-09	4.05855e-09	16.1384	16.1384	PAX7 up vs OCT4	9.86976	26.3885	12.0555	65.1958	57.777	3.32328	1
ENSG00000137817	1.08548e-07	5.1617e-07	6.22058	6.22058	MYOG up vs OCT4	3.89833	9.92622	8.33697	38.1071	30.5011	3.00152	1	7602	1.08548e-07	2.64037e-06	4.94776	4.94776	PAX7 up vs OCT4	3.10067	7.89517	7.29281	38.1071	30.5011	3.00152	1
ENSG00000137941	0.00104297	5.60381e-05	41.3417	41.3417	MYOG up vs OCT4	9.88904	172.831	5.54582	8.18195	61.3603	28.123	1	7627	0.00104297	0.00143886	13.6438	13.6438	PAX7 up vs OCT4	3.26364	57.0387	3.89396	8.18195	61.3603	28.123	1
ENSG00000138081	1.29286e-05	0.00357756	6.32318	6.32318	MYOG up vs OCT4	2.023	19.764	3.44922	18.1406	86.3525	17.8507	1	7665	1.29286e-05	0.000139568	15.0043	15.0043	PAX7 up vs OCT4	4.80038	46.8979	5.06536	18.1406	86.3525	17.8507	1
ENSG00000138449	1.63511e-05	1.81723e-05	210.638	210.638	MYOG up vs OCT4	33.1042	1340.27	6.16248	17.4493	218.996	47.0642	1	7737	1.63511e-05	0.000127485	84.6434	84.6434	PAX7 up vs OCT4	13.3026	538.577	5.11235	17.4493	218.996	47.0642	1
ENSG00000138468	9.96324e-05	0.00273674	19.7729	19.7729	MYOG up vs OCT4	3.34484	116.886	3.5798	12.7916	148.025	43.3952	1	7740	9.96324e-05	0.000114298	74.3907	74.3907	PAX7 up vs OCT4	12.5842	439.757	5.16921	12.7916	148.025	43.3952	1
ENSG00000138617	5.70556e-08	0.0111421	2.06508	2.06508	MYOG up vs OCT4	1.21043	3.5232	2.89343	41.8982	43.8216	3.92215	1	7755	5.70556e-08	3.36243e-07	8.68846	8.68846	PAX7 up vs OCT4	5.09265	14.8232	8.62636	41.8982	43.8216	3.92215	1
ENSG00000138653	4.08685e-07	1.51459e-06	8.6147	8.6147	MYOG up vs OCT4	4.72358	15.7112	7.63852	31.2459	41.3515	4.96282	1	7766	4.08685e-07	5.57043e-06	6.88425	6.88425	PAX7 up vs OCT4	3.77475	12.5553	6.84315	31.2459	41.3515	4.96282	1
ENSG00000138674	0.000350587	0.0018368	2050.38	2050.38	MYOG up vs OCT4	27.6451	152072	3.77443	10.1463	689.625	254.88	1	7773	0.000350587	0.00799604	480.761	480.761	PAX7 up vs OCT4	6.48205	35657	3.05654	10.1463	689.625	254.88	1
ENSG00000138696	5.10893e-08	1.56887e-05	18.0112	18.0112	MYOG up vs OCT4	6.71473	48.3124	6.24512	42.5825	151.944	13.3809	1	7780	5.10893e-08	2.598e-08	129.508	129.508	PAX7 up vs OCT4	48.2817	347.386	10.5066	42.5825	151.944	13.3809	1
ENSG00000138764	2.58161e-05	0.000117202	35030500000000	35030500000000	MYOG up vs OCT4	88188900	1.39148e+19	5.15612	16.165	9847.4	2284.43	1	7795	2.58161e-05	5.54234e-05	383382000000000	383382000000000	PAX7 up vs OCT4	965161000	1.52287e+20	5.55172	16.165	9847.4	2284.43	1
ENSG00000138802	1.51664e-05	0.00633166	6.98023	6.98023	MYOG up vs OCT4	1.89062	25.7713	3.17076	17.6683	110.482	23.4491	1	7811	1.51664e-05	0.000137892	22.3751	22.3751	PAX7 up vs OCT4	6.06037	82.6099	5.07162	17.6683	110.482	23.4491	1
ENSG00000138814	0.0149884	0.00315865	482.748	482.748	MYOG up vs OCT4	11.3237	20580.4	3.50991	4.39728	226.954	193.546	1	7813	0.0149884	0.00694172	245.478	245.478	PAX7 up vs OCT4	5.7581	10465.2	3.12578	4.39728	226.954	193.546	1
ENSG00000138834	0.00775025	0.00288465	28.5091	28.5091	MYOG up vs OCT4	3.8231	212.594	3.55414	5.21853	77.2088	55.4817	1	7817	0.00775025	0.000966012	47.2363	47.2363	PAX7 up vs OCT4	6.33445	352.244	4.08981	5.21853	77.2088	55.4817	1
ENSG00000139173	3.17911e-08	1.44562e-06	44.2238	44.2238	MYOG up vs OCT4	15.4247	126.793	7.66796	45.6391	185.578	15.2482	1	7842	3.17911e-08	3.92911e-07	67.3917	67.3917	PAX7 up vs OCT4	23.5053	193.218	8.52042	45.6391	185.578	15.2482	1
ENSG00000139219	8.36444e-05	0.00236505	877379000	877379000	MYOG up vs OCT4	5274.08	145958000000000	3.65099	13.1953	6989.62	1986.4	1	7857	8.36444e-05	3.48753e-05	163049000000000	163049000000000	PAX7 up vs OCT4	980117000	2.71243e+19	5.80207	13.1953	6989.62	1986.4	1
ENSG00000139291	0.000170332	0.000614004	3.83274	3.83274	MYOG up vs OCT4	1.97344	7.44378	4.31421	11.6103	18.7502	6.05611	1	7868	0.000170332	0.00014555	4.81021	4.81021	PAX7 up vs OCT4	2.47674	9.34219	5.04362	11.6103	18.7502	6.05611	1
ENSG00000139436	6.87499e-08	9.48292e-09	65.3187	65.3187	MYOG up vs OCT4	29.7489	143.418	11.3262	40.7655	92.4196	8.50163	1	7889	6.87499e-08	0.0012668	4.30548	4.30548	PAX7 up vs OCT4	1.9609	9.45341	3.95644	40.7655	92.4196	8.50163	1
ENSG00000139687	1.12591e-06	9.2667e-08	4700.59	4700.59	MYOG up vs OCT4	710.568	31095.6	9.53877	26.7598	350.114	49.0634	1	7931	1.12591e-06	4.44123e-05	152.446	152.446	PAX7 up vs OCT4	23.0445	1008.47	5.67085	26.7598	350.114	49.0634	1
ENSG00000139722	7.16678e-06	2.8338e-06	2406.13	2406.13	MYOG up vs OCT4	243.876	23739.4	7.24952	19.9754	383.636	72.0204	1	7936	7.16678e-06	8.92967e-05	296.035	296.035	PAX7 up vs OCT4	30.005	2920.74	5.29854	19.9754	383.636	72.0204	1
ENSG00000139793	8.48333e-06	1.90037e-05	642.387	642.387	MYOG up vs OCT4	68.0276	6066.1	6.13742	19.4362	359.12	69.2884	1	7944	8.48333e-06	4.39038e-06	1568.37	1568.37	PAX7 up vs OCT4	166.087	14810.2	6.98477	19.4362	359.12	69.2884	1
ENSG00000139974	0.000648638	0.000807133	6.71041	6.71041	MYOG up vs OCT4	2.54115	17.7201	4.17855	9.00345	31.1153	12.9598	1	7966	0.000648638	0.000190432	9.34342	9.34342	PAX7 up vs OCT4	3.53824	24.6731	4.90513	9.00345	31.1153	12.9598	1
ENSG00000140181	2.24602e-07	2.84438e-05	87.4675	87.4675	MYOG up vs OCT4	17.4565	438.264	5.91372	34.1945	325.488	35.6952	1	7990	2.24602e-07	1.38294e-07	1088.42	1088.42	PAX7 up vs OCT4	217.224	5453.65	9.24829	34.1945	325.488	35.6952	1
ENSG00000140262	6.2994e-09	1.62504e-08	18030200000	18030200000	MYOG up vs OCT4	176684000	1839950000000	10.8822	57.6506	4520.64	294.054	1	7994	6.2994e-09	1.70131e-07	377454000	377454000	PAX7 up vs OCT4	3698790	38518400000	9.10051	57.6506	4520.64	294.054	1
ENSG00000140386	7.76985e-08	2.6208e-08	11.0167	11.0167	MYOG up vs OCT4	6.76887	17.9304	10.4997	40.0374	34.8143	3.2608	1	8019	7.76985e-08	2.49697e-06	5.3356	5.3356	PAX7 up vs OCT4	3.27828	8.684	7.32711	40.0374	34.8143	3.2608	1
ENSG00000140455	3.81669e-06	0.00193159	12.2924	12.2924	MYOG up vs OCT4	2.95308	51.1683	3.74984	22.1002	164.743	27.9538	1	8031	3.81669e-06	7.89377e-05	36.1876	36.1876	PAX7 up vs OCT4	8.69356	150.634	5.36357	22.1002	164.743	27.9538	1
ENSG00000140557	3.47093e-07	2.51507e-06	4.15652	4.15652	MYOG up vs OCT4	2.74557	6.29255	7.32267	32.0274	20.1862	2.36355	1	8059	3.47093e-07	0.000268749	2.50959	2.50959	PAX7 up vs OCT4	1.6577	3.79926	4.7293	32.0274	20.1862	2.36355	1
ENSG00000140830	2.27982e-06	0.00200613	2.26451	2.26451	MYOG up vs OCT4	1.41972	3.61199	3.73134	23.9752	19.1557	2.99617	1	8085	2.27982e-06	2.15136e-06	5.07928	5.07928	PAX7 up vs OCT4	3.18442	8.10166	7.41909	23.9752	19.1557	2.99617	1
ENSG00000140937	5.52383e-06	8.77279e-05	68105000000000	68105000000000	MYOG up vs OCT4	189789000	2.44392e+19	5.30787	20.832	12491.2	2248.56	1	8099	5.52383e-06	4.87991e-05	443415000000000	443415000000000	PAX7 up vs OCT4	1235670000	1.59117e+20	5.62006	20.832	12491.2	2248.56	1
ENSG00000141279	0.00141477	0.000396887	307.795	307.795	MYOG up vs OCT4	20.8015	4554.36	4.53235	7.68072	204.37	99.7807	1	8148	0.00141477	0.00703225	51.5911	51.5911	PAX7 up vs OCT4	3.48665	763.38	3.11944	7.68072	204.37	99.7807	1
ENSG00000141431	3.35488e-05	0.00411687	7.5496	7.5496	MYOG up vs OCT4	2.11071	27.0034	3.38079	15.4626	92.051	22.3243	1	8172	3.35488e-05	1.46714e-05	42.8122	42.8122	PAX7 up vs OCT4	11.9694	153.131	6.283	15.4626	92.051	22.3243	1
ENSG00000141540	2.72129e-08	0.00309676	4.93432	4.93432	MYOG up vs OCT4	1.87675	12.9732	3.51955	46.6837	159.887	12.8433	1	8199	2.72129e-08	1.47617e-08	144.145	144.145	PAX7 up vs OCT4	54.8251	378.982	10.9603	46.6837	159.887	12.8433	1
ENSG00000141542	8.78467e-11	6.15551e-10	8.19234	8.19234	MYOG up vs OCT4	5.92245	11.3322	13.8169	105.144	40.5662	1.44681	1	8200	8.78467e-11	1.41825e-05	2.60991	2.60991	PAX7 up vs OCT4	1.88677	3.6102	6.30218	105.144	40.5662	1.44681	1
ENSG00000141570	4.86575e-05	2.3498e-05	3.74853	3.74853	MYOG up vs OCT4	2.34775	5.98508	6.0192	14.5067	11.6406	3.00911	1	8210	4.86575e-05	5.39325e-05	3.3938	3.3938	PAX7 up vs OCT4	2.12558	5.4187	5.56633	14.5067	11.6406	3.00911	1
ENSG00000141576	3.21637e-06	0.00102107	3.77886	3.77886	MYOG up vs OCT4	1.88122	7.5907	4.06249	22.7087	40.4923	6.68669	1	8212	3.21637e-06	0.00404703	3.03154	3.03154	PAX7 up vs OCT4	1.50918	6.08954	3.38913	22.7087	40.4923	6.68669	1
ENSG00000141582	0.00215015	0.000149183	5.29186	5.29186	MYOG up vs OCT4	2.61237	10.7197	5.03087	7.02407	12.8286	6.84893	1	8216	0.00215015	0.00926269	2.68691	2.68691	PAX7 up vs OCT4	1.32642	5.44287	2.98438	7.02407	12.8286	6.84893	1
ENSG00000141622	2.70024e-06	0.000439057	3.33734	3.33734	MYOG up vs OCT4	1.88137	5.92007	4.48167	23.3452	28.1097	4.51535	1	8217	2.70024e-06	1.52299e-06	7.79244	7.79244	PAX7 up vs OCT4	4.39286	13.8229	7.63504	23.3452	28.1097	4.51535	1
ENSG00000141644	0.000511543	0.000397712	5.56334	5.56334	MYOG up vs OCT4	2.48166	12.4718	4.53131	9.43364	22.5323	8.95691	1	8221	0.000511543	0.00378328	3.65482	3.65482	PAX7 up vs OCT4	1.63032	8.1933	3.42197	9.43364	22.5323	8.95691	1
ENSG00000142208	3.07048e-05	5.86912e-06	2377.29	2377.29	MYOG up vs OCT4	208.816	27064.5	6.81229	15.6973	340.358	81.3094	1	8281	3.07048e-05	0.00164183	79.0243	79.0243	PAX7 up vs OCT4	6.94133	899.661	3.82932	15.6973	340.358	81.3094	1
ENSG00000142459	2.92783e-05	0.000285897	3.69801	3.69801	MYOG up vs OCT4	2.04306	6.69355	4.69791	15.8246	20.4193	4.83883	1	8302	2.92783e-05	0.00404032	2.56943	2.56943	PAX7 up vs OCT4	1.41955	4.65078	3.38994	15.8246	20.4193	4.83883	1
ENSG00000142961	0.00132702	0.00158217	3.19834	3.19834	MYOG up vs OCT4	1.67958	6.09045	3.84744	7.78435	11.8359	5.7018	1	8367	0.00132702	0.00156741	3.20278	3.20278	PAX7 up vs OCT4	1.68191	6.0989	3.85203	7.78435	11.8359	5.7018	1
ENSG00000143171	1.57921e-08	4.27348e-09	38368200000000	38368200000000	MYOG up vs OCT4	149004000000	9879720000000000	12.0101	50.5148	5704.96	423.511	1	8399	1.57921e-08	0.00560071	4508.71	4508.71	PAX7 up vs OCT4	17.5097	1160980	3.23068	50.5148	5704.96	423.511	1
ENSG00000143333	0.000612912	0.0129456	49.8873	49.8873	MYOG up vs OCT4	2.5958	958.756	2.81929	9.10488	291.564	120.086	1	8434	0.000612912	0.0013156	235.335	235.335	PAX7 up vs OCT4	12.2453	4522.78	3.93788	9.10488	291.564	120.086	1
ENSG00000143393	2.42229e-06	3.88021e-07	388.562	388.562	MYOG up vs OCT4	87.5651	1724.21	8.52891	23.7479	193.253	30.5164	1	8455	2.42229e-06	4.52375e-05	52.3249	52.3249	PAX7 up vs OCT4	11.7918	232.187	5.66091	23.7479	193.253	30.5164	1
ENSG00000143437	0.000120942	0.00921807	6.64203	6.64203	MYOG up vs OCT4	1.7198	25.6522	2.98675	12.3549	82.6753	25.0938	1	8466	0.000120942	0.00038964	17.7984	17.7984	PAX7 up vs OCT4	4.60848	68.7391	4.54161	12.3549	82.6753	25.0938	1
ENSG00000143514	1.05381e-07	0.00546409	8.27939	8.27939	MYOG up vs OCT4	2.06347	33.22	3.24273	38.2746	270.796	26.5316	1	8486	1.05381e-07	3.59906e-06	102.606	102.606	PAX7 up vs OCT4	25.5725	411.694	7.10426	38.2746	270.796	26.5316	1
ENSG00000143603	2.72267e-07	4.08688e-07	8.48624	8.48624	MYOG up vs OCT4	4.96205	14.5134	8.49379	33.2208	35.0625	3.95789	1	8505	2.72267e-07	1.30357e-05	4.94673	4.94673	PAX7 up vs OCT4	2.89244	8.46003	6.35005	33.2208	35.0625	3.95789	1
ENSG00000143878	5.87729e-06	1.03795e-05	2.05479e+20	2.05479e+20	MYOG up vs OCT4	42822800000000	9.85957e+26	6.48032	20.6253	17890.2	3252.72	1	8555	5.87729e-06	8.16166e-06	5.59956e+20	5.59956e+20	PAX7 up vs OCT4	116698000000000	2.68686e+27	6.61922	20.6253	17890.2	3252.72	1
ENSG00000144026	0.000285656	0.00347689	5.17856	5.17856	MYOG up vs OCT4	1.88207	14.2489	3.46313	10.5477	39.6042	14.0804	1	8576	0.000285656	0.000735293	7.43483	7.43483	PAX7 up vs OCT4	2.70208	20.4571	4.22471	10.5477	39.6042	14.0804	1
ENSG00000144057	8.38168e-09	4.51022e-09	506624000000	506624000000	MYOG up vs OCT4	4161210000	61681000000000	11.9628	55.3389	4676.89	316.926	1	8587	8.38168e-09	0.00441429	1881.87	1881.87	PAX7 up vs OCT4	15.4569	229116	3.34679	55.3389	4676.89	316.926	1
ENSG00000144227	2.45866e-13	3.42694e-05	3.70314	3.70314	MYOG up vs OCT4	2.2911	5.98545	5.81163	235.244	198.775	3.16865	1	8608	2.45866e-13	9.25278e-13	134.599	134.599	PAX7 up vs OCT4	83.2752	217.555	21.762	235.244	198.775	3.16865	1
ENSG00000144306	0.000218172	0.00333415	3.25194	3.25194	MYOG up vs OCT4	1.58046	6.69117	3.48356	11.0926	21.1659	7.15545	1	8618	0.000218172	0.000123688	5.67433	5.67433	PAX7 up vs OCT4	2.75775	11.6755	5.12808	11.0926	21.1659	7.15545	1
ENSG00000144320	6.95712e-06	0.00559968	7.48525	7.48525	MYOG up vs OCT4	1.98363	28.2456	3.23077	20.0716	129.738	24.2392	1	8619	6.95712e-06	0.00210073	10.0825	10.0825	PAX7 up vs OCT4	2.67191	38.0462	3.70884	20.0716	129.738	24.2392	1
ENSG00000144426	7.44847e-05	0.00195015	3.42469	3.42469	MYOG up vs OCT4	1.69964	6.90058	3.74517	13.4682	24.2287	6.7461	1	8634	7.44847e-05	0.00212947	3.37667	3.37667	PAX7 up vs OCT4	1.67581	6.80381	3.7022	13.4682	24.2287	6.7461	1
ENSG00000144445	3.53261e-05	0.000210264	9.32788	9.32788	MYOG up vs OCT4	3.49923	24.8653	4.85438	15.327	54.0021	13.2125	1	8635	3.53261e-05	0.00182921	5.68122	5.68122	PAX7 up vs OCT4	2.13123	15.1444	3.77646	15.327	54.0021	13.2125	1
ENSG00000144485	0.000229729	0.000115744	11199700000000	11199700000000	MYOG up vs OCT4	45890200	2.73333e+18	5.16265	10.9867	6196.7	2115.07	1	8643	0.000229729	0.00335606	626657000	626657000	PAX7 up vs OCT4	2567.7	152938000000000	3.48037	10.9867	6196.7	2115.07	1
ENSG00000144560	7.99511e-07	1.04186e-07	3221.96	3221.96	MYOG up vs OCT4	521.341	19912.2	9.45309	28.2081	342.963	45.5935	1	8651	7.99511e-07	0.00241681	22.4384	22.4384	PAX7 up vs OCT4	3.63073	138.673	3.64043	28.2081	342.963	45.5935	1
ENSG00000144642	1.76317e-08	2.01577e-08	2285.91	2285.91	MYOG up vs OCT4	490.296	10657.6	10.7084	49.7165	431.871	32.575	1	8663	1.76317e-08	4.42145e-08	1465.9	1465.9	PAX7 up vs OCT4	314.417	6834.48	10.0933	49.7165	431.871	32.575	1
ENSG00000144824	1.0361e-07	0.0023155	114.824	114.824	MYOG up vs OCT4	7.25733	1816.71	3.66132	38.3708	1072.37	104.803	1	8696	1.0361e-07	8.11124e-09	2796760	2796760	PAX7 up vs OCT4	176767	44249600	11.4577	38.3708	1072.37	104.803	1
ENSG00000144834	9.68325e-05	7.9693e-06	868.526	868.526	MYOG up vs OCT4	98.7294	7640.45	6.63309	12.8567	222.794	64.9838	1	8698	9.68325e-05	0.00632748	25.4065	25.4065	PAX7 up vs OCT4	2.88807	223.502	3.17108	12.8567	222.794	64.9838	1
ENSG00000144868	0.000349064	0.000335843	2.18567	2.18567	MYOG up vs OCT4	1.52334	3.13598	4.61646	10.1548	4.85084	1.79134	1	8707	0.000349064	0.000786819	2.03376	2.03376	PAX7 up vs OCT4	1.41746	2.91802	4.19117	10.1548	4.85084	1.79134	1
ENSG00000145029	0.00233165	0.000440866	5.34902	5.34902	MYOG up vs OCT4	2.40853	11.8794	4.47961	6.90099	16.1024	8.75008	1	8722	0.00233165	0.00246909	3.89177	3.89177	PAX7 up vs OCT4	1.75237	8.64307	3.62999	6.90099	16.1024	8.75008	1
ENSG00000145147	0.000414529	0.00704763	10.0652	10.0652	MYOG up vs OCT4	2.07673	48.7824	3.11837	9.82595	89.709	34.2367	1	8733	0.000414529	3.41495e-05	74.0537	74.0537	PAX7 up vs OCT4	15.2794	358.912	5.81354	9.82595	89.709	34.2367	1
ENSG00000145331	0.00562281	0.00345163	2.61014	2.61014	MYOG up vs OCT4	1.44705	4.70808	3.46668	5.6432	7.19678	4.78237	1	8754	0.00562281	0.0067564	2.38386	2.38386	PAX7 up vs OCT4	1.3216	4.29993	3.13902	5.6432	7.19678	4.78237	1
ENSG00000145332	0.00276855	0.00321583	8.8015	8.8015	MYOG up vs OCT4	2.34168	33.0816	3.50117	6.64434	42.6926	24.0953	1	8755	0.00276855	0.00183524	10.4326	10.4326	PAX7 up vs OCT4	2.77563	39.2123	3.77485	6.64434	42.6926	24.0953	1
ENSG00000145349	6.3674e-07	1.17609e-07	32734.5	32734.5	MYOG up vs OCT4	3071.91	348822	9.36505	29.2084	599.341	76.9481	1	8759	6.3674e-07	2.15758e-06	3766.8	3766.8	PAX7 up vs OCT4	353.488	40139.4	7.4173	29.2084	599.341	76.9481	1
ENSG00000145431	2.75476e-08	0.000127998	9302360000	9302360000	MYOG up vs OCT4	646807	133786000000000	5.11026	46.6008	15654.7	1259.75	1	8775	2.75476e-08	7.59715e-09	2.87599e+22	2.87599e+22	PAX7 up vs OCT4	1.99972e+18	4.13624e+26	11.5132	46.6008	15654.7	1259.75	1
ENSG00000145604	9.10732e-07	3.99087e-06	15281800000000	15281800000000	MYOG up vs OCT4	1561790000	1.49528e+17	7.04199	27.6493	8555.99	1160.43	1	8789	9.10732e-07	3.03273e-05	101360000000	101360000000	PAX7 up vs OCT4	10359000	991785000000000	5.8785	27.6493	8555.99	1160.43	1
ENSG00000145675	1.10313e-07	5.72574e-07	101.297	101.297	MYOG up vs OCT4	30.8007	333.146	8.26794	38.0161	197.483	19.4802	1	8795	1.10313e-07	5.93664e-08	247.82	247.82	PAX7 up vs OCT4	75.3529	815.03	9.86967	38.0161	197.483	19.4802	1
ENSG00000145743	1.86754e-08	4.93639e-09	7.50122	7.50122	MYOG up vs OCT4	5.22603	10.7669	11.8839	49.3045	23.604	1.79527	1	8812	1.86754e-08	3.42848e-08	5.7242	5.7242	PAX7 up vs OCT4	3.988	8.21628	10.2894	49.3045	23.604	1.79527	1
ENSG00000145794	1.68339e-05	1.48741e-05	71066500000	71066500000	MYOG up vs OCT4	14648100	344785000000000	6.27523	17.3651	4584.39	989.999	1	8819	1.68339e-05	0.000354151	86473200	86473200	PAX7 up vs OCT4	17823.7	419532000000	4.58969	17.3651	4584.39	989.999	1
ENSG00000145824	4.61848e-09	8.89777e-05	8.41638	8.41638	MYOG up vs OCT4	3.5736	19.8219	5.30042	60.2648	162.075	10.0851	1	8823	4.61848e-09	1.27295e-08	85.938	85.938	PAX7 up vs OCT4	36.4894	202.397	11.0817	60.2648	162.075	10.0851	1
ENSG00000145949	1.33181e-08	2.8691e-09	54223.3	54223.3	MYOG up vs OCT4	8280.89	355054	12.3644	51.7726	670.065	48.5342	1	8849	1.33181e-08	0.0073097	15.3868	15.3868	PAX7 up vs OCT4	2.34985	100.753	3.1005	51.7726	670.065	48.5342	1
ENSG00000146278	0.000229894	0.000577226	574750	574750	MYOG up vs OCT4	859.261	384444000	4.34496	10.9852	1704.02	581.698	1	8899	0.000229894	0.00180098	103748	103748	PAX7 up vs OCT4	155.105	69395900	3.78406	10.9852	1704.02	581.698	1
ENSG00000146556	0.000253677	0.00250567	2.48914	2.48914	MYOG up vs OCT4	1.45558	4.2566	3.62281	10.7854	11.3792	3.95649	1	8933	0.000253677	0.00294366	2.44041	2.44041	PAX7 up vs OCT4	1.42709	4.17326	3.54426	10.7854	11.3792	3.95649	1
ENSG00000147081	3.36872e-09	0.00227169	2.53169	2.53169	MYOG up vs OCT4	1.47625	4.34171	3.67064	63.0356	67.2151	3.99864	1	8989	3.36872e-09	1.50359e-09	26.5493	26.5493	PAX7 up vs OCT4	15.4811	45.5305	12.9575	63.0356	67.2151	3.99864	1
ENSG00000147145	0.000127298	0.00192036	12891.9	12891.9	MYOG up vs OCT4	59.6681	2785420	3.75269	12.2414	1296.49	397.161	1	9006	0.000127298	0.00114734	24366.3	24366.3	PAX7 up vs OCT4	112.776	5264580	4.00511	12.2414	1296.49	397.161	1
ENSG00000147378	0.000663761	0.000420659	2.93717	2.93717	MYOG up vs OCT4	1.76379	4.89115	4.50314	8.9624	8.54326	3.57462	1	9032	0.000663761	0.00892976	2.05107	2.05107	PAX7 up vs OCT4	1.23168	3.41556	3.00236	8.9624	8.54326	3.57462	1
ENSG00000147526	7.99179e-06	4.30597e-06	525.483	525.483	MYOG up vs OCT4	77.9365	3543.04	6.99639	19.6256	261.976	50.0575	1	9060	7.99179e-06	0.00481807	19.2669	19.2669	PAX7 up vs OCT4	2.85755	129.906	3.30412	19.6256	261.976	50.0575	1
ENSG00000147852	1.20517e-08	0.000125934	17.4092	17.4092	MYOG up vs OCT4	5.29802	57.206	5.11871	52.5236	272.453	19.4522	1	9099	1.20517e-08	1.85433e-07	155.309	155.309	PAX7 up vs OCT4	47.2643	510.342	9.03958	52.5236	272.453	19.4522	1
ENSG00000147862	1.23121e-08	0.00593997	8.91525	8.91525	MYOG up vs OCT4	2.07806	38.248	3.20196	52.3621	407.029	29.15	1	9102	1.23121e-08	7.40857e-09	2646.69	2646.69	PAX7 up vs OCT4	616.919	11354.8	11.5345	52.3621	407.029	29.15	1
ENSG00000147912	1.01615e-07	2.6852e-08	131.205	131.205	MYOG up vs OCT4	48.6654	353.735	10.4806	38.4814	138.733	13.5195	1	9113	1.01615e-07	2.88281e-06	29.0326	29.0326	PAX7 up vs OCT4	10.7685	78.2734	7.23904	38.4814	138.733	13.5195	1
ENSG00000148120	2.08025e-07	0.000240086	2.08428	2.08428	MYOG up vs OCT4	1.50289	2.89057	4.78667	34.5894	13.5584	1.46993	1	9123	2.08025e-07	1.91575e-08	5.2032	5.2032	PAX7 up vs OCT4	3.75183	7.21603	10.7493	34.5894	13.5584	1.46993	1
ENSG00000148444	0.00540038	0.00168838	18.3232	18.3232	MYOG up vs OCT4	3.60975	93.009	3.81564	5.69785	55.113	36.2723	1	9173	0.00540038	0.00482765	12.3983	12.3983	PAX7 up vs OCT4	2.44253	62.9343	3.30315	5.69785	55.113	36.2723	1
ENSG00000148516	1.08396e-06	1.38909e-06	3261240000	3261240000	MYOG up vs OCT4	7544740	1409680000000	7.69321	26.9172	3633.75	506.24	1	9184	1.08396e-06	8.31843e-06	148468000	148468000	PAX7 up vs OCT4	343474	64175800000	6.60817	26.9172	3633.75	506.24	1
ENSG00000149212	1.65122e-05	0.00017056	40630900	40630900	MYOG up vs OCT4	21892.3	75409000000	4.96178	17.4209	3616.64	778.514	1	9256	1.65122e-05	8.3543e-05	151039000	151039000	PAX7 up vs OCT4	81381.2	280322000000	5.33363	17.4209	3616.64	778.514	1
ENSG00000149289	4.35338e-05	4.54373e-06	4.52283	4.52283	MYOG up vs OCT4	2.84982	7.17798	6.96425	14.7878	11.5625	2.9321	1	9266	4.35338e-05	0.000202202	2.87562	2.87562	PAX7 up vs OCT4	1.81192	4.56377	4.87439	14.7878	11.5625	2.9321	1
ENSG00000150347	2.82003e-06	9.90083e-06	104.857	104.857	MYOG up vs OCT4	22.8441	481.303	6.50748	23.1858	197.345	31.9179	1	9371	2.82003e-06	2.90112e-07	512.79	512.79	PAX7 up vs OCT4	111.717	2353.76	8.72757	23.1858	197.345	31.9179	1
ENSG00000150471	2.36773e-06	5.43339e-05	7.55968	7.55968	MYOG up vs OCT4	3.48232	16.4111	5.56236	23.8331	52.4832	8.25791	1	9381	2.36773e-06	0.00368989	3.48643	3.48643	PAX7 up vs OCT4	1.606	7.56861	3.43416	23.8331	52.4832	8.25791	1
ENSG00000151062	0.000497328	0.00147997	5.75284	5.75284	MYOG up vs OCT4	2.2002	15.0419	3.88015	9.48559	32.1167	12.6969	1	9436	0.000497328	0.0026948	5.04123	5.04123	PAX7 up vs OCT4	1.92804	13.1812	3.58733	9.48559	32.1167	12.6969	1
ENSG00000151093	0.0180825	0.00848266	2.53309	2.53309	MYOG up vs OCT4	1.31667	4.87334	3.02757	4.17549	6.55243	5.88472	1	9442	0.0180825	0.00428351	2.80651	2.80651	PAX7 up vs OCT4	1.45878	5.39935	3.36145	4.17549	6.55243	5.88472	1
ENSG00000151148	0.019869	0.0117525	2.67776	2.67776	MYOG up vs OCT4	1.28754	5.56907	2.8671	4.06603	7.99057	7.3695	1	9448	0.019869	0.00713496	2.91314	2.91314	PAX7 up vs OCT4	1.40071	6.05861	3.11235	4.06603	7.99057	7.3695	1
ENSG00000151422	1.66649e-06	1.15252e-05	6.55956	6.55956	MYOG up vs OCT4	3.51305	12.248	6.4203	25.1799	35.9853	5.35923	1	9482	1.66649e-06	5.14888e-07	11.5067	11.5067	PAX7 up vs OCT4	6.16253	21.4853	8.33863	25.1799	35.9853	5.35923	1
ENSG00000151458	6.29641e-09	0.0039718	120.833	120.833	MYOG up vs OCT4	5.97322	2444.36	3.39828	57.6546	1910.85	124.286	1	9484	6.29641e-09	9.86929e-09	8304580	8304580	PAX7 up vs OCT4	410525	167995000	11.2928	57.6546	1910.85	124.286	1
ENSG00000151892	5.44715e-05	2.99453e-05	111.132	111.132	MYOG up vs OCT4	20.1802	611.996	5.88546	14.2257	151.749	40.0022	1	9550	5.44715e-05	0.0042139	14.8336	14.8336	PAX7 up vs OCT4	2.69362	81.6881	3.36944	14.2257	151.749	40.0022	1
ENSG00000152022	5.83268e-05	0.00168186	15.6479	15.6479	MYOG up vs OCT4	3.36941	72.6708	3.81753	14.0574	121.493	32.4099	1	9561	5.83268e-05	2.64406e-06	191.231	191.231	PAX7 up vs OCT4	41.1771	888.101	7.29196	14.0574	121.493	32.4099	1
ENSG00000152133	0.00622105	0.00160362	13.7	13.7	MYOG up vs OCT4	3.20557	58.5509	3.84085	5.50754	42.5874	28.9971	1	9578	0.00622105	0.00272763	11.48	11.48	PAX7 up vs OCT4	2.68613	49.0632	3.58142	5.50754	42.5874	28.9971	1
ENSG00000152620	0.000626907	0.00187949	127.266	127.266	MYOG up vs OCT4	8.17746	1980.63	3.7632	9.06437	250.31	103.555	1	9647	0.000626907	0.0055074	64.7833	64.7833	PAX7 up vs OCT4	4.16265	1008.22	3.23888	9.06437	250.31	103.555	1
ENSG00000152642	1.74493e-05	0.00920411	5.92206	5.92206	MYOG up vs OCT4	1.66474	21.0669	2.98749	17.2617	101.884	22.1337	1	9648	1.74493e-05	0.00187286	9.40791	9.40791	PAX7 up vs OCT4	2.64464	33.4672	3.76493	17.2617	101.884	22.1337	1
ENSG00000152778	0.000701462	0.00355894	6.01358	6.01358	MYOG up vs OCT4	1.98619	18.2073	3.45176	8.86451	39.8719	16.8672	1	9664	0.000701462	0.000124897	14.3341	14.3341	PAX7 up vs OCT4	4.73432	43.3991	5.12302	8.86451	39.8719	16.8672	1
ENSG00000152990	2.8955e-06	0.000497293	210.785	210.785	MYOG up vs OCT4	15.9605	2783.75	4.41933	23.0893	563.614	91.5381	1	9688	2.8955e-06	0.0012262	122.701	122.701	PAX7 up vs OCT4	9.29084	1620.46	3.97243	23.0893	563.614	91.5381	1
ENSG00000153066	0.00230653	0.00234759	4.31377	4.31377	MYOG up vs OCT4	1.83905	10.1186	3.6546	6.91737	18.4282	9.99018	1	9700	0.00230653	0.00964536	3.2732	3.2732	PAX7 up vs OCT4	1.39543	7.67778	2.96448	6.91737	18.4282	9.99018	1
ENSG00000153707	1.01189e-08	6.38647e-09	121801000	121801000	MYOG up vs OCT4	4052830	3660520000	11.6613	53.8618	2286.05	159.161	1	9758	1.01189e-08	9.33544e-07	324105	324105	PAX7 up vs OCT4	10784.3	9740410	7.94763	53.8618	2286.05	159.161	1
ENSG00000153721	1.9806e-08	0.000229317	2.85982	2.85982	MYOG up vs OCT4	1.79525	4.55568	4.81007	48.8866	38.8449	2.97971	1	9760	1.9806e-08	8.21945e-09	12.1885	12.1885	PAX7 up vs OCT4	7.65132	19.4162	11.4465	48.8866	38.8449	2.97971	1
ENSG00000154240	7.09743e-06	7.41975e-07	5.92905	5.92905	MYOG up vs OCT4	3.71114	9.47246	8.09709	20.0068	16.0965	3.01707	1	9830	7.09743e-06	3.0684e-06	4.869	4.869	PAX7 up vs OCT4	3.04763	7.77889	7.201	20.0068	16.0965	3.01707	1
ENSG00000154310	1.66049e-12	5.22371e-09	353.864	353.864	MYOG up vs OCT4	122.967	1018.32	11.8347	181.409	742.843	15.3557	1	9841	1.66049e-12	1.37537e-12	36386.7	36386.7	PAX7 up vs OCT4	12644.3	104711	21.1773	181.409	742.843	15.3557	1
ENSG00000154330	2.19113e-07	4.47572e-08	599541	599541	MYOG up vs OCT4	36021.6	9978730	10.084	34.3215	994.718	108.684	1	9845	2.19113e-07	0.00605313	67.5063	67.5063	PAX7 up vs OCT4	4.05591	1123.57	3.19274	34.3215	994.718	108.684	1
ENSG00000154553	3.12306e-06	3.16575e-06	7.04519e+20	7.04519e+20	MYOG up vs OCT4	457850000000000	1.08408e+27	7.182	22.8148	16971.5	2789.56	1	9867	3.12306e-06	0.000253541	65184800000000	65184800000000	PAX7 up vs OCT4	42362000	1.00303e+20	4.75891	22.8148	16971.5	2789.56	1
ENSG00000154734	0.00402478	0.00206794	3595.87	3595.87	MYOG up vs OCT4	32.8492	393625	3.71652	6.10441	493.307	303.043	1	9887	0.00402478	0.00419683	1681.23	1681.23	PAX7 up vs OCT4	15.3585	184037	3.37142	6.10441	493.307	303.043	1
ENSG00000154781	0.000161716	0.000169117	9.7896	9.7896	MYOG up vs OCT4	3.67733	26.0614	4.96615	11.721	41.1849	13.1766	1	9894	0.000161716	0.00745514	4.13654	4.13654	PAX7 up vs OCT4	1.55384	11.0121	3.09086	11.721	41.1849	13.1766	1
ENSG00000155729	0.000739811	0.000227156	3.46115	3.46115	MYOG up vs OCT4	1.99765	5.99682	4.8149	8.77085	9.71114	4.15202	1	9985	0.000739811	0.000434505	3.18044	3.18044	PAX7 up vs OCT4	1.83563	5.51046	4.48689	8.77085	9.71114	4.15202	1
ENSG00000156030	1.10035e-06	6.90824e-06	110.624	110.624	MYOG up vs OCT4	24.8452	492.56	6.71648	26.8549	219.538	30.6561	1	10026	1.10035e-06	4.50924e-07	366.876	366.876	PAX7 up vs OCT4	82.3969	1633.53	8.42749	26.8549	219.538	30.6561	1
ENSG00000156050	1.41863e-08	8.99877e-09	2.35496	2.35496	MYOG up vs OCT4	2.00563	2.76512	11.3702	51.3031	4.84757	0.354333	1	10029	1.41863e-08	1.58433e-08	2.27348	2.27348	PAX7 up vs OCT4	1.93624	2.66945	10.9028	51.3031	4.84757	0.354333	1
ENSG00000156113	5.71495e-06	0.00024142	6.22231	6.22231	MYOG up vs OCT4	2.75553	14.0507	4.78384	20.7184	50.3803	9.11876	1	10036	5.71495e-06	2.88934e-06	15.8928	15.8928	PAX7 up vs OCT4	7.03807	35.8878	7.23766	20.7184	50.3803	9.11876	1
ENSG00000157107	0.000955726	0.000556558	12.4466	12.4466	MYOG up vs OCT4	3.63163	42.6576	4.36313	8.32925	46.3179	20.8532	1	10155	0.000955726	0.00310162	7.64081	7.64081	PAX7 up vs OCT4	2.22942	26.187	3.51879	8.32925	46.3179	20.8532	1
ENSG00000157240	4.54066e-06	0.00115564	13.9028	13.9028	MYOG up vs OCT4	3.42156	56.4909	4.00156	21.4966	154.864	27.0154	1	10174	4.54066e-06	3.46693e-07	287.257	287.257	PAX7 up vs OCT4	70.6958	1167.21	8.60547	21.4966	154.864	27.0154	1
ENSG00000157514	6.43427e-08	0.000270409	58545.7	58545.7	MYOG up vs OCT4	414.389	8271450	4.72617	41.1648	3697.93	336.871	1	10204	6.43427e-08	4.1971e-09	1352300000000	1352300000000	PAX7 up vs OCT4	9571620000	191055000000000	12.0259	41.1648	3697.93	336.871	1
ENSG00000158079	2.9629e-05	0.00759521	2.79495	2.79495	MYOG up vs OCT4	1.37292	5.6899	3.08174	15.7926	29.2504	6.94558	1	10271	2.9629e-05	0.000196489	5.10691	5.10691	PAX7 up vs OCT4	2.50858	10.3965	4.88908	15.7926	29.2504	6.94558	1
ENSG00000158805	6.26096e-08	6.38124e-06	3.67724	3.67724	MYOG up vs OCT4	2.43945	5.54311	6.76303	41.3304	25.5127	2.31483	1	10362	6.26096e-08	2.35278e-08	7.67584	7.67584	PAX7 up vs OCT4	5.09208	11.5706	10.5851	41.3304	25.5127	2.31483	1
ENSG00000158828	1.09902e-09	0.000119882	40.9801	40.9801	MYOG up vs OCT4	8.79909	190.857	5.14435	73.8682	640.776	32.5297	1	10368	1.09902e-09	3.79709e-05	63.7134	63.7134	PAX7 up vs OCT4	13.6803	296.733	5.75576	73.8682	640.776	32.5297	1
ENSG00000158863	0.0149263	0.00806082	2.03284	2.03284	MYOG up vs OCT4	1.23872	3.33608	3.05259	4.40223	3.95916	3.37257	1	10372	0.0149263	0.00157047	2.44736	2.44736	PAX7 up vs OCT4	1.4913	4.01633	3.85108	4.40223	3.95916	3.37257	1
ENSG00000159388	0.000680488	0.000205379	2.39645e+16	2.39645e+16	MYOG up vs OCT4	1604880000	3.57845e+23	4.86641	8.91821	8919.41	3750.5	1	10444	0.000680488	0.00171056	6627610000000	6627610000000	PAX7 up vs OCT4	443844	9.89653e+19	3.80925	8.91821	8919.41	3750.5	1
ENSG00000159713	3.82867e-07	5.92255e-08	1573.13	1573.13	MYOG up vs OCT4	321.01	7709.26	9.87146	31.5561	292.154	34.7185	1	10478	3.82867e-07	0.00120403	19.4686	19.4686	PAX7 up vs OCT4	3.97271	95.4072	3.9814	31.5561	292.154	34.7185	1
ENSG00000160216	6.717e-07	0.00181648	3.05808	3.05808	MYOG up vs OCT4	1.6282	5.74368	3.77987	28.9708	42.1855	5.46052	1	10548	6.717e-07	1.20253e-06	9.99582	9.99582	PAX7 up vs OCT4	5.32202	18.7741	7.78494	28.9708	42.1855	5.46052	1
ENSG00000160271	6.81316e-07	0.000825868	6.41256	6.41256	MYOG up vs OCT4	2.47885	16.5887	4.16721	28.9079	95.7145	12.4163	1	10559	6.81316e-07	1.18699e-07	64.9182	64.9182	PAX7 up vs OCT4	25.0948	167.938	9.35838	28.9079	95.7145	12.4163	1
ENSG00000160310	0.000135114	3.36481e-05	73.671	73.671	MYOG up vs OCT4	15.2627	355.601	5.82162	12.1103	109.993	34.0597	1	10569	0.000135114	0.00498509	11.3363	11.3363	PAX7 up vs OCT4	2.34857	54.7189	3.2875	12.1103	109.993	34.0597	1
ENSG00000160325	2.81507e-06	6.69956e-06	4.68679	4.68679	MYOG up vs OCT4	2.87438	7.642	6.73445	23.1923	20.3186	3.28535	1	10573	2.81507e-06	0.000432485	2.80034	2.80034	PAX7 up vs OCT4	1.71743	4.56606	4.48923	23.1923	20.3186	3.28535	1
ENSG00000160360	0.000660174	0.00590037	110.106	110.106	MYOG up vs OCT4	4.83085	2509.57	3.20523	8.97204	321.422	134.343	1	10580	0.000660174	5.17112e-05	3633.07	3633.07	PAX7 up vs OCT4	159.399	82806.1	5.5889	8.97204	321.422	134.343	1
ENSG00000160867	1.33861e-10	0.0082475	42.9102	42.9102	MYOG up vs OCT4	3.07913	597.99	3.04136	99.1719	2522.68	95.3904	1	10643	1.33861e-10	1.35255e-10	182071000	182071000	PAX7 up vs OCT4	13064900	2537310000	15.3883	99.1719	2522.68	95.3904	1
ENSG00000160888	3.68295e-07	0.00238132	8879.42	8879.42	MYOG up vs OCT4	43.7725	1801230	3.64764	31.7418	3283.34	387.897	1	10650	3.68295e-07	9.50307e-07	389447000	389447000	PAX7 up vs OCT4	1919840	79000800000	7.93613	31.7418	3283.34	387.897	1
ENSG00000160948	0.024851	0.00232542	105.024	105.024	MYOG up vs OCT4	6.981	1580.01	3.65923	3.81099	102.656	101.013	1	10654	0.024851	0.00901819	45.2658	45.2658	PAX7 up vs OCT4	3.00884	680.991	2.99752	3.81099	102.656	101.013	1
ENSG00000160953	3.43479e-07	0.01228	2.55872	2.55872	MYOG up vs OCT4	1.26584	5.17211	2.84541	32.078	58.2317	6.80743	1	10657	3.43479e-07	4.75983e-06	9.87821	9.87821	PAX7 up vs OCT4	4.88691	19.9674	6.93653	32.078	58.2317	6.80743	1
ENSG00000161682	8.65249e-09	1.38852e-09	84026.1	84026.1	MYOG up vs OCT4	13152.7	536803	13.0322	55.0869	694.372	47.2689	1	10736	8.65249e-09	0.00112329	32.9099	32.9099	PAX7 up vs OCT4	5.15141	210.246	4.01553	55.0869	694.372	47.2689	1
ENSG00000161835	7.74297e-07	0.00244055	7.22201	7.22201	MYOG up vs OCT4	2.266	23.0174	3.63566	28.3471	139.59	18.4661	1	10744	7.74297e-07	0.00349641	6.56548	6.56548	PAX7 up vs OCT4	2.06	20.925	3.4604	28.3471	139.59	18.4661	1
ENSG00000162104	0.000148073	0.000715279	5.34911	5.34911	MYOG up vs OCT4	2.30163	12.4316	4.23839	11.9108	31.0462	9.7746	1	10789	0.000148073	7.32685e-05	8.48006	8.48006	PAX7 up vs OCT4	3.64882	19.7081	5.40301	11.9108	31.0462	9.7746	1
ENSG00000162290	1.94308e-08	0.000563479	7.06934	7.06934	MYOG up vs OCT4	2.71555	18.4034	4.35697	49.0222	164.474	12.5816	1	10806	1.94308e-08	3.11515e-07	49.1902	49.1902	PAX7 up vs OCT4	18.8955	128.056	8.67865	49.0222	164.474	12.5816	1
ENSG00000162337	3.37902e-05	0.00332865	137.981	137.981	MYOG up vs OCT4	6.7741	2810.52	3.48436	15.4437	514.197	124.856	1	10810	3.37902e-05	0.000147913	1236.74	1236.74	PAX7 up vs OCT4	60.717	25191	5.03529	15.4437	514.197	124.856	1
ENSG00000162413	9.99292e-07	1.25493e-07	14108.2	14108.2	MYOG up vs OCT4	1586.05	125496	9.31817	27.257	477.171	65.6488	1	10833	9.99292e-07	0.00502551	28.9868	28.9868	PAX7 up vs OCT4	3.2587	257.844	3.28356	27.257	477.171	65.6488	1
ENSG00000162441	0.000186382	0.000257585	130.041	130.041	MYOG up vs OCT4	14.6423	1154.92	4.75086	11.42	199.635	65.5543	1	10842	0.000186382	4.61274e-05	326.865	326.865	PAX7 up vs OCT4	36.8041	2902.96	5.6504	11.42	199.635	65.5543	1
ENSG00000162641	1.65301e-11	5.86241e-12	697.718	697.718	MYOG up vs OCT4	336.793	1445.43	19.1617	132.423	257.472	7.29114	1	10893	1.65301e-11	0.00652235	2.94037	2.94037	PAX7 up vs OCT4	1.41934	6.09143	3.15626	132.423	257.472	7.29114	1
ENSG00000162745	0.000458192	0.000234436	46403300	46403300	MYOG up vs OCT4	18253.9	117962000000	4.7988	9.63777	2171.61	844.959	1	10926	0.000458192	0.00404016	260487	260487	PAX7 up vs OCT4	102.469	662186000	3.38996	9.63777	2171.61	844.959	1
ENSG00000162944	9.94393e-06	0.000256493	12.8964	12.8964	MYOG up vs OCT4	4.09722	40.5929	4.75302	18.9392	91.2653	18.0708	1	10977	9.94393e-06	8.79009e-05	17.3724	17.3724	PAX7 up vs OCT4	5.51924	54.6815	5.30683	18.9392	91.2653	18.0708	1
ENSG00000162981	2.13225e-08	8.99077e-09	6.80066	6.80066	MYOG up vs OCT4	4.74779	9.74115	11.3709	48.3667	22.89	1.77472	1	10989	2.13225e-08	0.000173955	2.30433	2.30433	PAX7 up vs OCT4	1.60874	3.30069	4.95163	48.3667	22.89	1.77472	1
ENSG00000162994	0.000207933	0.00265907	2.03207	2.03207	MYOG up vs OCT4	1.33446	3.09437	3.59383	11.1918	7.25407	2.4306	1	10992	0.000207933	8.38165e-05	2.86329	2.86329	PAX7 up vs OCT4	1.88032	4.36013	5.3319	11.1918	7.25407	2.4306	1
ENSG00000163067	8.82899e-07	7.84562e-08	3.5883	3.5883	MYOG up vs OCT4	2.70691	4.75668	9.6615	27.7816	8.09003	1.092	1	11014	8.82899e-07	2.12784e-06	2.66988	2.66988	PAX7 up vs OCT4	2.01408	3.53922	7.42591	27.7816	8.09003	1.092	1
ENSG00000163312	0.00437633	0.00129972	3.79204	3.79204	MYOG up vs OCT4	1.84511	7.79337	3.94384	5.98706	11.387	7.13229	1	11078	0.00437633	0.0017523	3.609	3.609	PAX7 up vs OCT4	1.75604	7.41718	3.79746	5.98706	11.387	7.13229	1
ENSG00000163328	2.09733e-06	0.00370634	2.15043	2.15043	MYOG up vs OCT4	1.33662	3.45972	3.43199	24.291	20.1314	3.10785	1	11082	2.09733e-06	0.000278	2.86126	2.86126	PAX7 up vs OCT4	1.77845	4.60334	4.71212	24.291	20.1314	3.10785	1
ENSG00000163449	0.00580131	0.000572288	13.2859	13.2859	MYOG up vs OCT4	3.73978	47.1994	4.34924	5.60108	32.9897	22.087	1	11117	0.00580131	0.00474089	7.16926	7.16926	PAX7 up vs OCT4	2.01804	25.4695	3.31199	5.60108	32.9897	22.087	1
ENSG00000163512	0.00198927	0.000819423	106.052	106.052	MYOG up vs OCT4	9.78283	1149.66	4.17108	7.14341	148.714	78.0687	1	11139	0.00198927	0.00065938	119.623	119.623	PAX7 up vs OCT4	11.0347	1296.78	4.27877	7.14341	148.714	78.0687	1
ENSG00000163513	6.67097e-09	0.00438949	410.254	410.254	MYOG up vs OCT4	8.91784	18873.3	3.34954	57.1797	3072.12	201.478	1	11140	6.67097e-09	2.64468e-05	44127.8	44127.8	PAX7 up vs OCT4	959.221	2030050	5.95382	57.1797	3072.12	201.478	1
ENSG00000163638	8.55068e-06	1.13546e-06	9031.5	9031.5	MYOG up vs OCT4	754.721	108077	7.82162	19.4112	438.317	84.6774	1	11196	8.55068e-06	0.00151321	90.5457	90.5457	PAX7 up vs OCT4	7.56649	1083.53	3.86927	19.4112	438.317	84.6774	1
ENSG00000163660	0.00366614	0.00609012	123243	123243	MYOG up vs OCT4	48.8695	310806000	3.18977	6.23669	1402.4	843.238	1	11202	0.00366614	0.00497072	177413	177413	PAX7 up vs OCT4	70.3492	447415000	3.2889	6.23669	1402.4	843.238	1
ENSG00000163738	5.79048e-05	0.000523072	2.2484	2.2484	MYOG up vs OCT4	1.51771	3.33088	4.39408	14.0752	7.96827	2.12295	1	11228	5.79048e-05	0.000306895	2.36227	2.36227	PAX7 up vs OCT4	1.59458	3.49957	4.66202	14.0752	7.96827	2.12295	1
ENSG00000163848	0.016336	0.0129311	13.8857	13.8857	MYOG up vs OCT4	1.90077	101.439	2.81985	4.2949	62.2495	54.3518	1	11263	0.016336	0.00165775	35.4552	35.4552	PAX7 up vs OCT4	4.85336	259.01	3.8246	4.2949	62.2495	54.3518	1
ENSG00000163909	1.96834e-06	1.88584e-05	76276.4	76276.4	MYOG up vs OCT4	1541.64	3773960	6.14172	24.5337	1368.73	209.212	1	11282	1.96834e-06	1.75333e-06	998048	998048	PAX7 up vs OCT4	20171.8	49380800	7.54653	24.5337	1368.73	209.212	1
ENSG00000163947	9.19252e-07	2.82467e-07	39.4868	39.4868	MYOG up vs OCT4	16.1208	96.7204	8.74597	27.6097	81.2136	11.0306	1	11297	9.19252e-07	7.99506e-05	9.50196	9.50196	PAX7 up vs OCT4	3.87925	23.2744	5.35683	27.6097	81.2136	11.0306	1
ENSG00000164056	5.90648e-10	1.53839e-05	57.9877	57.9877	MYOG up vs OCT4	14.5404	231.257	6.25619	80.608	565.326	26.2998	1	11332	5.90648e-10	2.36837e-10	14744.6	14744.6	PAX7 up vs OCT4	3697.21	58802	14.79	80.608	565.326	26.2998	1
ENSG00000164093	2.12451e-08	2.38211e-07	1073060000000000	1073060000000000	MYOG up vs OCT4	260827000000	4.41464e+18	8.86403	48.3922	12283.9	951.904	1	11351	2.12451e-08	4.0414e-08	1.70636e+17	1.70636e+17	PAX7 up vs OCT4	41476200000000	7.02009e+20	10.1623	48.3922	12283.9	951.904	1
ENSG00000164187	7.42426e-07	8.47327e-08	160.998	160.998	MYOG up vs OCT4	52.1297	497.229	9.60462	28.5303	132.969	17.4773	1	11394	7.42426e-07	0.0017222	7.48992	7.48992	PAX7 up vs OCT4	2.42516	23.132	3.80594	28.5303	132.969	17.4773	1
ENSG00000164292	4.71104e-06	1.55299e-06	102791000000	102791000000	MYOG up vs OCT4	85669000	123335000000000	7.62274	21.3704	3937.22	690.889	1	11420	4.71104e-06	0.000110668	31036800	31036800	PAX7 up vs OCT4	25866.9	37239900000	5.18606	21.3704	3937.22	690.889	1
ENSG00000164303	5.14425e-05	0.000684669	2.72792	2.72792	MYOG up vs OCT4	1.65109	4.50703	4.26009	14.3676	13.2756	3.46499	1	11425	5.14425e-05	7.03026e-05	3.58923	3.58923	PAX7 up vs OCT4	2.17241	5.93009	5.42493	14.3676	13.2756	3.46499	1
ENSG00000164603	0.000692679	0.000397801	65.9031	65.9031	MYOG up vs OCT4	9.18972	472.617	4.53119	8.88677	126.418	53.3454	1	11499	0.000692679	0.000286432	76.8155	76.8155	PAX7 up vs OCT4	10.7114	550.874	4.69696	8.88677	126.418	53.3454	1
ENSG00000164610	8.72296e-05	2.90503e-05	14.9505	14.9505	MYOG up vs OCT4	5.62924	39.7067	5.90212	13.0976	45.8002	13.1132	1	11502	8.72296e-05	8.49988e-05	11.4736	11.4736	PAX7 up vs OCT4	4.3201	30.4725	5.32452	13.0976	45.8002	13.1132	1
ENSG00000164674	1.59203e-07	5.14394e-07	42.5983	42.5983	MYOG up vs OCT4	16.328	111.135	8.33927	35.9991	121.327	12.6386	1	11521	1.59203e-07	2.63381e-07	52.2759	52.2759	PAX7 up vs OCT4	20.0374	136.383	8.79431	35.9991	121.327	12.6386	1
ENSG00000164684	4.91451e-07	6.42231e-05	97.1926	97.1926	MYOG up vs OCT4	16.3514	577.711	5.47302	30.3839	353.779	43.6637	1	11524	4.91451e-07	1.36753e-07	2299.41	2299.41	PAX7 up vs OCT4	386.848	13667.7	9.25633	30.3839	353.779	43.6637	1
ENSG00000164758	1.00157e-06	0.00344188	5.85898	5.85898	MYOG up vs OCT4	1.97662	17.3669	3.46806	27.2475	117.908	16.2274	1	11548	1.00157e-06	0.000421619	9.92505	9.92505	PAX7 up vs OCT4	3.34837	29.4193	4.50199	27.2475	117.908	16.2274	1
ENSG00000164896	0.000181292	0.00180214	4.80438	4.80438	MYOG up vs OCT4	1.98454	11.631	3.78375	11.4783	32.8859	10.744	1	11579	0.000181292	9.25654e-05	8.93551	8.93551	PAX7 up vs OCT4	3.69098	21.632	5.27963	11.4783	32.8859	10.744	1
ENSG00000164916	0.00150425	0.00129099	9.08508	9.08508	MYOG up vs OCT4	2.75952	29.9105	3.94715	7.58227	39.4577	19.5148	1	11585	0.00150425	0.000357589	12.9762	12.9762	PAX7 up vs OCT4	3.94143	42.7212	4.58482	7.58227	39.4577	19.5148	1
ENSG00000164938	9.3592e-06	4.60709e-06	573884	573884	MYOG up vs OCT4	9867.49	33376600	6.95598	19.1275	1157.39	226.91	1	11595	9.3592e-06	0.0023386	1064.58	1064.58	PAX7 up vs OCT4	18.3047	61915.3	3.65648	19.1275	1157.39	226.91	1
ENSG00000165092	1.26763e-06	2.75474e-05	141.929	141.929	MYOG up vs OCT4	23.9175	842.22	5.93134	26.2734	305.347	43.5822	1	11630	1.26763e-06	3.44215e-06	386.741	386.741	PAX7 up vs OCT4	65.1728	2294.96	7.13121	26.2734	305.347	43.5822	1
ENSG00000165097	4.14612e-06	0.00351007	2.71185	2.71185	MYOG up vs OCT4	1.46638	5.01514	3.4585	21.8108	30.2185	5.19557	1	11631	4.14612e-06	0.0102292	2.33213	2.33213	PAX7 up vs OCT4	1.26106	4.31292	2.93556	21.8108	30.2185	5.19557	1
ENSG00000165121	8.63151e-06	3.04704e-05	4.4035	4.4035	MYOG up vs OCT4	2.57196	7.5393	5.87592	19.3815	20.5402	3.97419	1	11639	8.63151e-06	0.00039772	3.13671	3.13671	PAX7 up vs OCT4	1.83206	5.3704	4.5313	19.3815	20.5402	3.97419	1
ENSG00000165156	1.50749e-06	2.76206e-06	261.397	261.397	MYOG up vs OCT4	51.0644	1338.08	7.2652	25.5761	249.96	36.6495	1	11646	1.50749e-06	1.33131e-07	1219.59	1219.59	PAX7 up vs OCT4	238.248	6243.02	9.27562	25.5761	249.96	36.6495	1
ENSG00000165233	3.83673e-05	0.000210524	3.83055	3.83055	MYOG up vs OCT4	2.12388	6.90861	4.85375	15.1121	19.2649	4.7805	1	11667	3.83673e-05	0.00885043	2.29779	2.29779	PAX7 up vs OCT4	1.27403	4.14421	3.00674	15.1121	19.2649	4.7805	1
ENSG00000165240	2.90842e-08	1.58179e-06	7.04085	7.04085	MYOG up vs OCT4	4.07619	12.1618	7.61117	46.2343	50.622	4.10588	1	11669	2.90842e-08	2.51374e-09	24.5627	24.5627	PAX7 up vs OCT4	14.2202	42.4275	12.4839	46.2343	50.622	4.10588	1
ENSG00000165379	0.000161971	0.00238533	5.49921	5.49921	MYOG up vs OCT4	2.03057	14.893	3.64682	11.7177	42.6283	13.6423	1	11695	0.000161971	1.48414e-05	18.7982	18.7982	PAX7 up vs OCT4	6.94121	50.9095	6.27648	11.7177	42.6283	13.6423	1
ENSG00000165424	3.4153e-07	3.07181e-08	199863	199863	MYOG up vs OCT4	16283.6	2453100	10.375	32.1056	739.848	86.4159	1	11706	3.4153e-07	4.86304e-07	19046.3	19046.3	PAX7 up vs OCT4	1551.77	233773	8.37681	32.1056	739.848	86.4159	1
ENSG00000165487	0.00902562	0.00279935	5006.46	5006.46	MYOG up vs OCT4	30.9018	811106	3.56877	5.02283	476.514	355.761	1	11719	0.00902562	0.00238368	6036.62	6036.62	PAX7 up vs OCT4	37.2603	978004	3.64716	5.02283	476.514	355.761	1
ENSG00000165495	3.15583e-06	2.02963e-06	180.559	180.559	MYOG up vs OCT4	40.8745	797.599	7.45524	22.7772	184.231	30.3316	1	11722	3.15583e-06	5.63179e-07	320.582	320.582	PAX7 up vs OCT4	72.5727	1416.14	8.27893	22.7772	184.231	30.3316	1
ENSG00000165617	1.73595e-12	0.00290272	485.971	485.971	MYOG up vs OCT4	11.8589	19914.8	3.55109	180.312	9111.32	189.49	1	11750	1.73595e-12	0.000244861	4109.65	4109.65	PAX7 up vs OCT4	100.286	168411	4.77664	180.312	9111.32	189.49	1
ENSG00000165633	1.48538e-06	2.99432e-07	1373.96	1373.96	MYOG up vs OCT4	234.262	8058.36	8.70581	25.6349	294.024	43.0112	1	11757	1.48538e-06	0.00521681	15.0305	15.0305	PAX7 up vs OCT4	2.56273	88.155	3.26533	25.6349	294.024	43.0112	1
ENSG00000165669	0.0276524	0.00339004	11.595	11.595	MYOG up vs OCT4	2.57969	52.1159	3.47546	3.6916	30.5607	31.0442	1	11767	0.0276524	0.00869705	8.38232	8.38232	PAX7 up vs OCT4	1.86493	37.6761	3.01532	3.6916	30.5607	31.0442	1
ENSG00000165917	3.54802e-08	6.98654e-09	2.45067e+16	2.45067e+16	MYOG up vs OCT4	23648000000000	2.53966e+19	11.5845	44.9144	7936.38	662.625	1	11831	3.54802e-08	0.000410991	2439920	2439920	PAX7 up vs OCT4	2354.42	2528520000	4.51481	44.9144	7936.38	662.625	1
ENSG00000165943	2.58729e-07	1.80511e-07	68431.6	68431.6	MYOG up vs OCT4	4983.56	939667	9.05858	33.4764	842.03	94.3236	1	11836	2.58729e-07	1.60865e-05	2118.17	2118.17	PAX7 up vs OCT4	154.256	29085.5	6.231	33.4764	842.03	94.3236	1
ENSG00000166326	6.91878e-09	7.04624e-08	1216.69	1216.69	MYOG up vs OCT4	257.116	5757.48	9.74134	56.8818	503.695	33.2067	1	11938	6.91878e-09	2.55149e-08	2148.22	2148.22	PAX7 up vs OCT4	453.97	10165.5	10.5209	56.8818	503.695	33.2067	1
ENSG00000166439	1.44995e-06	0.00491916	6.61699	6.61699	MYOG up vs OCT4	1.9482	22.4744	3.29399	25.7313	140.999	20.5487	1	11972	1.44995e-06	1.10698e-05	40.2991	40.2991	PAX7 up vs OCT4	11.865	136.874	6.44338	25.7313	140.999	20.5487	1
ENSG00000166482	3.46038e-07	0.00863344	7369.88	7369.88	MYOG up vs OCT4	13.7063	3962790	3.01892	32.0421	4642.36	543.311	1	11987	3.46038e-07	4.17821e-08	9679370000000	9679370000000	PAX7 up vs OCT4	18001400000	5204600000000000	10.1367	32.0421	4642.36	543.311	1
ENSG00000166619	1.35704e-12	3.84503e-13	6.37365e+26	6.37365e+26	MYOG up vs OCT4	2.14985e+24	1.88959e+29	23.1119	186.471	22142.3	445.289	1	12021	1.35704e-12	5.16609e-06	97327900	97327900	PAX7 up vs OCT4	328289	28854800000	6.88781	186.471	22142.3	445.289	1
ENSG00000166685	0.00118474	0.000154879	5.33504	5.33504	MYOG up vs OCT4	2.61745	10.8742	5.0115	7.97002	14.8125	6.96946	1	12030	0.00118474	0.00192883	3.5009	3.5009	PAX7 up vs OCT4	1.71759	7.13575	3.75054	7.97002	14.8125	6.96946	1
ENSG00000166783	4.37742e-06	0.000550337	4.74728	4.74728	MYOG up vs OCT4	2.22032	10.1502	4.36873	21.6227	45.7651	7.93698	1	12048	4.37742e-06	1.11855e-05	9.92557	9.92557	PAX7 up vs OCT4	4.64223	21.2219	6.43742	21.6227	45.7651	7.93698	1
ENSG00000166949	1.18518e-07	2.31839e-05	39.5636	39.5636	MYOG up vs OCT4	10.7741	145.282	6.02666	37.6139	233.258	23.2551	1	12108	1.18518e-07	1.0702e-05	51.6269	51.6269	PAX7 up vs OCT4	14.0592	189.579	6.46275	37.6139	233.258	23.2551	1
ENSG00000167232	4.56645e-07	1.47965e-06	185316	185316	MYOG up vs OCT4	6321.01	5432970	7.65326	30.7247	1285.12	156.851	1	12174	4.56645e-07	0.000558366	1004.91	1004.91	PAX7 up vs OCT4	34.2769	29461.3	4.36151	30.7247	1285.12	156.851	1
ENSG00000167244	0.00394388	0.00210151	3.03649e+31	3.03649e+31	MYOG up vs OCT4	24475000000000	3.76722e+49	3.70865	6.13305	39016.6	23856.3	1	12176	0.00394388	0.000444282	9.86443e+37	9.86443e+37	PAX7 up vs OCT4	7.95101e+19	1.22383e+56	4.47574	6.13305	39016.6	23856.3	1
ENSG00000167378	5.51122e-05	0.000146733	11.1373	11.1373	MYOG up vs OCT4	4.01827	30.8687	5.03943	14.1968	54.0763	14.2839	1	12202	5.51122e-05	0.00221821	5.81932	5.81932	PAX7 up vs OCT4	2.09958	16.1292	3.68227	14.1968	54.0763	14.2839	1
ENSG00000167526	1.68743e-06	0.0002718	2.00456e+20	2.00456e+20	MYOG up vs OCT4	138353000000	2.90437e+29	4.72357	25.1309	40984.3	6115.62	1	12232	1.68743e-06	7.81241e-06	3.62194e+28	3.62194e+28	PAX7 up vs OCT4	2.49983e+19	5.24775e+37	6.64466	25.1309	40984.3	6115.62	1
ENSG00000167528	8.1439e-10	3.13595e-05	2.51738	2.51738	MYOG up vs OCT4	1.79935	3.52194	5.86015	77.0519	31.8431	1.54975	1	12233	8.1439e-10	3.70525e-05	2.48152	2.48152	PAX7 up vs OCT4	1.77372	3.47177	5.76908	77.0519	31.8431	1.54975	1
ENSG00000167565	2.8119e-05	4.9504e-06	2377.57	2377.57	MYOG up vs OCT4	216.377	26125.1	6.91315	15.9332	335.476	78.9567	1	12246	2.8119e-05	0.00453915	42.4436	42.4436	PAX7 up vs OCT4	3.86268	466.375	3.33319	15.9332	335.476	78.9567	1
ENSG00000167566	4.80992e-06	3.64288e-06	279.397	279.397	MYOG up vs OCT4	51.4684	1516.72	7.09695	21.2995	223.403	39.3324	1	12247	4.80992e-06	0.000103461	63.0522	63.0522	PAX7 up vs OCT4	11.615	342.281	5.22127	21.2995	223.403	39.3324	1
ENSG00000167671	1.06628e-06	0.00023711	10.709	10.709	MYOG up vs OCT4	3.73096	30.738	4.79302	26.9856	109.963	15.2808	1	12281	1.06628e-06	0.00104012	7.42749	7.42749	PAX7 up vs OCT4	2.5877	21.3191	4.05338	26.9856	109.963	15.2808	1
ENSG00000167720	0.000106012	9.51169e-05	3.54037	3.54037	MYOG up vs OCT4	2.12222	5.90619	5.26535	12.6505	12.1436	3.59972	1	12296	0.000106012	6.68527e-06	5.03931	5.03931	PAX7 up vs OCT4	3.02073	8.40677	6.7357	12.6505	12.1436	3.59972	1
ENSG00000168172	1.97371e-05	0.0133283	3.18126	3.18126	MYOG up vs OCT4	1.32029	7.66534	2.80486	16.9106	47.9348	10.6298	1	12424	1.97371e-05	3.91859e-06	18.3575	18.3575	PAX7 up vs OCT4	7.61873	44.233	7.05298	16.9106	47.9348	10.6298	1
ENSG00000168256	4.12533e-05	1.82764e-05	11.4726	11.4726	MYOG up vs OCT4	4.9313	26.691	6.15928	14.9253	39.0004	9.79892	1	12437	4.12533e-05	2.3813e-05	10.8217	10.8217	PAX7 up vs OCT4	4.65149	25.1765	6.01182	14.9253	39.0004	9.79892	1
ENSG00000168264	0.000370026	5.49755e-05	387779	387779	MYOG up vs OCT4	2783.95	54014100	5.55607	10.0424	896.963	334.942	1	12441	0.000370026	0.00343247	3088.15	3088.15	PAX7 up vs OCT4	22.1705	430151	3.46939	10.0424	896.963	334.942	1
ENSG00000168283	9.37196e-05	2.70491e-05	833.998	833.998	MYOG up vs OCT4	74.6811	9313.63	5.9414	12.9317	275.97	80.0269	1	12450	9.37196e-05	6.09207e-05	506.66	506.66	PAX7 up vs OCT4	45.3694	5658.11	5.50116	12.9317	275.97	80.0269	1
ENSG00000168614	4.47918e-05	0.00308563	9.23572	9.23572	MYOG up vs OCT4	2.40475	35.4708	3.52131	14.7154	97.6594	24.887	1	12527	4.47918e-05	2.62215e-06	100.163	100.163	PAX7 up vs OCT4	26.0799	384.685	7.29706	14.7154	97.6594	24.887	1
ENSG00000168769	4.38259e-06	6.73192e-06	45.2635	45.2635	MYOG up vs OCT4	13.5358	151.36	6.73162	21.6186	115.464	20.0286	1	12558	4.38259e-06	9.37939e-06	40.578	40.578	PAX7 up vs OCT4	12.1346	135.692	6.53868	21.6186	115.464	20.0286	1
ENSG00000168772	0.00112508	0.00209143	7.70142	7.70142	MYOG up vs OCT4	2.3843	24.8761	3.711	8.05551	40.589	18.895	1	12559	0.00112508	0.0039676	6.48609	6.48609	PAX7 up vs OCT4	2.00804	20.9505	3.39879	8.05551	40.589	18.895	1
ENSG00000168795	5.1667e-10	7.90736e-07	13.676	13.676	MYOG up vs OCT4	6.84525	27.3231	8.05549	82.1349	144.191	6.58329	1	12566	5.1667e-10	1.24324e-08	36.7666	36.7666	PAX7 up vs OCT4	18.4028	73.4554	11.1012	82.1349	144.191	6.58329	1
ENSG00000168874	1.87987e-07	2.18273e-06	61.3663	61.3663	MYOG up vs OCT4	18.778	200.544	7.41012	35.1173	180.485	19.2731	1	12582	1.87987e-07	3.28114e-07	121.737	121.737	PAX7 up vs OCT4	37.2514	397.835	8.64309	35.1173	180.485	19.2731	1
ENSG00000169116	3.92664e-10	8.07455e-10	1.52573e+32	1.52573e+32	MYOG up vs OCT4	1.32194e+27	1.76094e+37	13.5507	85.3532	42504	1867.42	1	12646	3.92664e-10	2.5805e-08	9.25383e+24	9.25383e+24	PAX7 up vs OCT4	8.01778e+19	1.06804e+30	10.512	85.3532	42504	1867.42	1
ENSG00000169122	7.82504e-06	0.00224271	41.468	41.468	MYOG up vs OCT4	4.78573	359.317	3.67691	19.6929	336.526	64.0825	1	12648	7.82504e-06	1.59884e-06	2216.59	2216.59	PAX7 up vs OCT4	255.812	19206.6	7.60442	19.6929	336.526	64.0825	1
ENSG00000169221	0.000114077	0.000528666	4.30638	4.30638	MYOG up vs OCT4	2.11909	8.75135	4.38877	12.4854	23.0102	6.91111	1	12674	0.000114077	1.11282e-05	8.5219	8.5219	PAX7 up vs OCT4	4.19347	17.3181	6.44036	12.4854	23.0102	6.91111	1
ENSG00000169515	1.01142e-08	8.05651e-09	775002000	775002000	MYOG up vs OCT4	17237600	34844200000	11.4635	53.8654	2859.46	199.07	1	12742	1.01142e-08	4.7223e-07	3243680	3243680	PAX7 up vs OCT4	72145.8	145836000	8.39649	53.8654	2859.46	199.07	1
ENSG00000169554	4.14327e-06	1.38944e-05	51519.3	51519.3	MYOG up vs OCT4	1322.15	2007520	6.31382	21.8132	1072.53	184.384	1	12747	4.14327e-06	8.12403e-07	996821	996821	PAX7 up vs OCT4	25581.6	38842400	8.03787	21.8132	1072.53	184.384	1
ENSG00000169762	4.94873e-05	1.9251e-05	2.47778	2.47778	MYOG up vs OCT4	1.80738	3.39686	6.13019	14.4643	5.27657	1.368	1	12797	4.94873e-05	0.000132702	2.12469	2.12469	PAX7 up vs OCT4	1.54982	2.91279	5.09152	14.4643	5.27657	1.368	1
ENSG00000169946	0.000361857	0.000307883	2.85017	2.85017	MYOG up vs OCT4	1.76536	4.6016	4.66039	10.0853	8.48187	3.1538	1	12840	0.000361857	0.000141516	3.11671	3.11671	PAX7 up vs OCT4	1.93045	5.03192	5.05817	10.0853	8.48187	3.1538	1
ENSG00000170004	4.47246e-05	0.000182038	4102580	4102580	MYOG up vs OCT4	5661.76	2972780000	4.92828	14.7193	2339.75	596.096	1	12855	4.47246e-05	1.56166e-05	241856000	241856000	PAX7 up vs OCT4	333773	175252000000	6.24772	14.7193	2339.75	596.096	1
ENSG00000170153	6.01966e-07	0.000157597	5.80894	5.80894	MYOG up vs OCT4	2.74495	12.293	5.00252	29.4598	60.6763	7.72361	1	12882	6.01966e-07	5.86423e-06	10.98	10.98	PAX7 up vs OCT4	5.18845	23.2361	6.81279	29.4598	60.6763	7.72361	1
ENSG00000170162	9.30229e-08	2.38022e-08	273860000000	273860000000	MYOG up vs OCT4	1356550000	55287100000000	10.5759	38.9875	4025.53	387.194	1	12885	9.30229e-08	8.21963e-05	598991	598991	PAX7 up vs OCT4	2967.06	120925000	5.3422	38.9875	4025.53	387.194	1
ENSG00000170185	0.000367712	0.000352455	12.5871	12.5871	MYOG up vs OCT4	3.88499	40.7814	4.59211	10.0544	50.9248	18.9935	1	12891	0.000367712	0.000656354	10.6028	10.6028	PAX7 up vs OCT4	3.27254	34.3524	4.28106	10.0544	50.9248	18.9935	1
ENSG00000170242	0.00640132	0.000729065	530.46	530.46	MYOG up vs OCT4	22.4586	12529.2	4.22893	5.46953	200.439	137.424	1	12902	0.00640132	0.0032509	178.797	178.797	PAX7 up vs OCT4	7.56987	4223.09	3.49588	5.46953	200.439	137.424	1
ENSG00000170390	2.02215e-10	9.51754e-11	213.549	213.549	MYOG up vs OCT4	103.452	440.818	15.7745	93.6391	180.277	7.21961	1	12943	2.02215e-10	7.30613e-06	9.70548	9.70548	PAX7 up vs OCT4	4.70171	20.0345	6.68373	93.6391	180.277	7.21961	1
ENSG00000170456	4.21165e-05	4.87932e-06	30.1858	30.1858	MYOG up vs OCT4	10.5711	86.1958	6.92176	14.8722	60.0098	15.1313	1	12959	4.21165e-05	0.000757178	7.94502	7.94502	PAX7 up vs OCT4	2.78235	22.687	4.21018	14.8722	60.0098	15.1313	1
ENSG00000170776	2.20826e-06	2.56974e-06	56.9984	56.9984	MYOG up vs OCT4	17.5328	185.3	7.30945	24.0955	122.749	19.1035	1	13028	2.20826e-06	9.37005e-07	81.0197	81.0197	PAX7 up vs OCT4	24.9217	263.392	7.94524	24.0955	122.749	19.1035	1
ENSG00000170802	0.000103598	0.0044895	12.4738	12.4738	MYOG up vs OCT4	2.49043	62.477	3.33856	12.7028	120.857	35.6783	1	13037	0.000103598	0.00658067	10.8324	10.8324	PAX7 up vs OCT4	2.16272	54.2557	3.15191	12.7028	120.857	35.6783	1
ENSG00000170852	0.000258562	0.000780692	23.6706	23.6706	MYOG up vs OCT4	4.7423	118.149	4.19504	10.7469	101.81	35.5252	1	13049	0.000258562	0.00011317	49.5478	49.5478	PAX7 up vs OCT4	9.92669	247.312	5.17439	10.7469	101.81	35.5252	1
ENSG00000170854	6.6752e-05	3.46241e-05	133.929	133.929	MYOG up vs OCT4	22.1859	808.487	5.80601	13.73	162.655	44.4252	1	13050	6.6752e-05	8.91583e-05	87.3524	87.3524	PAX7 up vs OCT4	14.4703	527.319	5.29936	13.73	162.655	44.4252	1
ENSG00000170873	3.16744e-09	6.55502e-10	541.231	541.231	MYOG up vs OCT4	204.088	1435.32	13.7548	63.5903	221.694	13.0735	1	13056	3.16744e-09	0.00505654	4.48661	4.48661	PAX7 up vs OCT4	1.69181	11.8983	3.28055	63.5903	221.694	13.0735	1
ENSG00000170892	4.41622e-05	0.00320731	10.8947	10.8947	MYOG up vs OCT4	2.54688	46.6035	3.50246	14.7514	114.207	29.033	1	13062	4.41622e-05	1.48044e-06	184.64	184.64	PAX7 up vs OCT4	43.164	789.827	7.65292	14.7514	114.207	29.033	1
ENSG00000170921	1.90477e-05	0.00697013	10.9952	10.9952	MYOG up vs OCT4	2.1417	56.4476	3.12378	17.0113	166.846	36.7799	1	13072	1.90477e-05	5.12853e-06	198.267	198.267	PAX7 up vs OCT4	38.6195	1017.87	6.89214	17.0113	166.846	36.7799	1
ENSG00000170962	1.36456e-08	3.72129e-09	5582.71	5582.71	MYOG up vs OCT4	1226.24	25416.4	12.1321	51.5916	434.416	31.5761	1	13088	1.36456e-08	0.00298128	12.379	12.379	PAX7 up vs OCT4	2.71905	56.358	3.53807	51.5916	434.416	31.5761	1
ENSG00000171016	9.61084e-09	2.13153e-07	70.3011	70.3011	MYOG up vs OCT4	25.5091	193.744	8.94163	54.2621	204.385	14.1249	1	13095	9.61084e-09	9.54002e-10	583.009	583.009	PAX7 up vs OCT4	211.548	1606.73	13.3894	54.2621	204.385	14.1249	1
ENSG00000171223	1.67199e-05	0.00238817	31578700	31578700	MYOG up vs OCT4	1304.8	764268000000	3.64624	17.3847	6492.31	1400.44	1	13151	1.67199e-05	2.32078e-06	1454630000000000	1454630000000000	PAX7 up vs OCT4	60103800000	3.52049e+19	7.3722	17.3847	6492.31	1400.44	1
ENSG00000171310	1.00236e-10	9.71657e-12	77.9972	77.9972	MYOG up vs OCT4	47.2184	128.839	18.5022	103.237	95.3099	3.46205	1	13167	1.00236e-10	0.00330145	2.27367	2.27367	PAX7 up vs OCT4	1.37645	3.75574	3.48836	103.237	95.3099	3.46205	1
ENSG00000171365	6.28383e-07	3.02855e-06	165198000	165198000	MYOG up vs OCT4	614067	44442300000	7.20896	29.2674	3357.7	430.219	1	13176	6.28383e-07	3.01371e-07	8304520000	8304520000	PAX7 up vs OCT4	30869100	2234110000000	8.70138	29.2674	3357.7	430.219	1
ENSG00000171456	3.87321e-07	1.05025e-05	96.0791	96.0791	MYOG up vs OCT4	21.3717	431.936	6.47355	31.5009	260.85	31.0527	1	13199	3.87321e-07	4.66521e-08	1198.61	1198.61	PAX7 up vs OCT4	266.617	5388.52	10.0523	31.5009	260.85	31.0527	1
ENSG00000171766	0.00197742	0.00160633	3922.41	3922.41	MYOG up vs OCT4	39.7107	387434	3.84002	7.15263	552.99	289.923	1	13276	0.00197742	0.00547093	1081.51	1081.51	PAX7 up vs OCT4	10.9492	106825	3.24212	7.15263	552.99	289.923	1
ENSG00000171992	3.26873e-05	0.000213088	3.96694	3.96694	MYOG up vs OCT4	2.1643	7.27099	4.84755	15.5312	20.8975	5.04568	1	13338	3.26873e-05	8.7882e-05	4.52032	4.52032	PAX7 up vs OCT4	2.46622	8.28528	5.30694	15.5312	20.8975	5.04568	1
ENSG00000172037	1.19188e-06	0.000303885	18273.6	18273.6	MYOG up vs OCT4	206.739	1615200	4.667	26.5252	1952.74	276.068	1	13350	1.19188e-06	0.0033435	1513.14	1513.14	PAX7 up vs OCT4	17.1189	133746	3.48219	26.5252	1952.74	276.068	1
ENSG00000172458	5.46314e-09	3.03248e-09	5.65401	5.65401	MYOG up vs OCT4	4.18925	7.63092	12.3146	58.8368	19.3877	1.23568	1	13454	5.46314e-09	1.14945e-07	3.74256	3.74256	PAX7 up vs OCT4	2.77299	5.05113	9.38165	58.8368	19.3877	1.23568	1
ENSG00000172594	0.000195908	0.00317256	20.0138	20.0138	MYOG up vs OCT4	3.24036	123.614	3.50777	11.3156	137.487	45.5633	1	13487	0.000195908	0.000132188	77.5578	77.5578	PAX7 up vs OCT4	12.5571	479.029	5.09353	11.3156	137.487	45.5633	1
ENSG00000172732	2.11215e-05	0.000589982	2.77435	2.77435	MYOG up vs OCT4	1.67965	4.58251	4.33407	16.7198	15.4324	3.46125	1	13509	2.11215e-05	9.11144e-06	4.68054	4.68054	PAX7 up vs OCT4	2.8337	7.73104	6.55543	16.7198	15.4324	3.46125	1
ENSG00000172831	0.000561026	0.000281033	5.24594	5.24594	MYOG up vs OCT4	2.47652	11.1123	4.70661	9.26476	19.1311	7.74348	1	13539	0.000561026	0.000169721	5.74428	5.74428	PAX7 up vs OCT4	2.71178	12.1679	4.96431	9.26476	19.1311	7.74348	1
ENSG00000172995	8.25367e-10	1.78004e-10	832331000000000	832331000000000	MYOG up vs OCT4	6503530000000	1.06523e+17	15.0924	76.907	6635.53	323.55	1	13574	8.25367e-10	0.00387889	2349.28	2349.28	PAX7 up vs OCT4	18.3564	300663	3.40981	76.907	6635.53	323.55	1
ENSG00000173011	4.41817e-05	0.000877363	2.14139	2.14139	MYOG up vs OCT4	1.44654	3.17003	4.13731	14.7503	8.3194	2.11507	1	13575	4.41817e-05	0.000403006	2.29963	2.29963	PAX7 up vs OCT4	1.55342	3.40428	4.52466	14.7503	8.3194	2.11507	1
ENSG00000173039	1.28451e-05	5.51124e-06	9.65031	9.65031	MYOG up vs OCT4	4.76614	19.5396	6.84947	18.16	33.1237	6.83999	1	13578	1.28451e-05	2.63557e-06	11.1796	11.1796	PAX7 up vs OCT4	5.52145	22.6361	7.29393	18.16	33.1237	6.83999	1
ENSG00000173114	1.08483e-05	0.00417265	41.2279	41.2279	MYOG up vs OCT4	3.9346	431.998	3.37423	18.6712	377.695	75.8577	1	13592	1.08483e-05	7.97776e-06	1495.75	1495.75	PAX7 up vs OCT4	142.747	15672.9	6.63247	18.6712	377.695	75.8577	1
ENSG00000173482	2.66614e-05	7.55393e-05	17.4975	17.4975	MYOG up vs OCT4	5.63844	54.299	5.38685	16.0773	75.5683	17.6262	1	13672	2.66614e-05	3.54939e-06	43.7717	43.7717	PAX7 up vs OCT4	14.1051	135.834	7.11265	16.0773	75.5683	17.6262	1
ENSG00000173511	0.00274107	0.00238559	95.2518	95.2518	MYOG up vs OCT4	6.64155	1366.08	3.64677	6.65909	173.103	97.4813	1	13674	0.00274107	0.000389178	291.591	291.591	PAX7 up vs OCT4	20.3315	4181.94	4.54221	6.65909	173.103	97.4813	1
ENSG00000173546	0.000104139	0.00109565	22.0232	22.0232	MYOG up vs OCT4	4.28791	113.113	4.02778	12.6909	124.539	36.7997	1	13682	0.000104139	0.000323997	35.0909	35.0909	PAX7 up vs OCT4	6.83219	180.231	4.6346	12.6909	124.539	36.7997	1
ENSG00000173599	7.4504e-06	3.97485e-06	75.3481	75.3481	MYOG up vs OCT4	20.3761	278.628	7.0444	19.8502	124.425	23.5058	1	13696	7.4504e-06	0.000119389	23.5153	23.5153	PAX7 up vs OCT4	6.35913	86.9565	5.14649	19.8502	124.425	23.5058	1
ENSG00000173812	2.18758e-05	3.20134e-05	2476320000	2476320000	MYOG up vs OCT4	934326	6563190000000	5.84885	16.6218	3785.21	853.972	1	13735	2.18758e-05	0.000453901	14832700	14832700	PAX7 up vs OCT4	5596.43	39312200000	4.46501	16.6218	3785.21	853.972	1
ENSG00000173889	0.000129321	1.75743e-05	24.1286	24.1286	MYOG up vs OCT4	8.05009	72.3211	6.18125	12.2066	53.9095	16.5615	1	13749	0.000129321	0.00271056	6.33469	6.33469	PAX7 up vs OCT4	2.11346	18.9871	3.58448	12.2066	53.9095	16.5615	1
ENSG00000174093	0.000376811	0.000483313	3.22299	3.22299	MYOG up vs OCT4	1.83617	5.65725	4.43358	10.0075	11.6107	4.35073	1	13785	0.000376811	0.0025218	2.59989	2.59989	PAX7 up vs OCT4	1.48118	4.56353	3.61968	10.0075	11.6107	4.35073	1
ENSG00000174099	5.28902e-05	0.000301079	39.5553	39.5553	MYOG up vs OCT4	7.38728	211.8	4.6717	14.2986	147.549	38.6967	1	13786	5.28902e-05	0.00027602	40.9509	40.9509	PAX7 up vs OCT4	7.64792	219.273	4.71574	14.2986	147.549	38.6967	1
ENSG00000174132	7.074e-07	1.09784e-05	163.178	163.178	MYOG up vs OCT4	30.2872	879.15	6.44813	28.7422	298.781	38.982	1	13794	7.074e-07	0.00702583	11.7648	11.7648	PAX7 up vs OCT4	2.18364	63.3848	3.11989	28.7422	298.781	38.982	1
ENSG00000174136	3.81963e-07	1.43848e-06	1126.07	1126.07	MYOG up vs OCT4	159.835	7933.32	7.67109	31.5673	441	52.388	1	13795	3.81963e-07	3.71456e-06	658.402	658.402	PAX7 up vs OCT4	93.4544	4638.55	7.08519	31.5673	441	52.388	1
ENSG00000174373	2.61143e-06	0.000434408	4.21958	4.21958	MYOG up vs OCT4	2.12936	8.3616	4.487	23.4685	40.2326	6.4287	1	13837	2.61143e-06	0.000556208	4.05556	4.05556	PAX7 up vs OCT4	2.04659	8.03657	4.36344	23.4685	40.2326	6.4287	1
ENSG00000174405	0.00099923	7.88529e-05	25.5903	25.5903	MYOG up vs OCT4	7.05625	92.8061	5.36414	8.25398	50.2095	22.8115	1	13841	0.00099923	0.0058333	6.96356	6.96356	PAX7 up vs OCT4	1.92013	25.2541	3.21081	8.25398	50.2095	22.8115	1
ENSG00000174485	3.80038e-06	7.19546e-06	6.2011	6.2011	MYOG up vs OCT4	3.46806	11.088	6.69265	22.1153	27.3736	4.64163	1	13861	3.80038e-06	3.99155e-07	10.1772	10.1772	PAX7 up vs OCT4	5.69177	18.1975	8.50975	22.1153	27.3736	4.64163	1
ENSG00000174740	2.69168e-09	5.53655e-10	477.084	477.084	MYOG up vs OCT4	185.569	1226.55	13.922	65.0779	212.673	12.2549	1	13905	2.69168e-09	2.13375e-07	52.5084	52.5084	PAX7 up vs OCT4	20.4239	134.995	8.94091	65.0779	212.673	12.2549	1
ENSG00000174917	1.49678e-05	0.00408454	30.9314	30.9314	MYOG up vs OCT4	3.56313	268.514	3.38464	17.7069	303.107	64.1923	1	13938	1.49678e-05	0.00678374	24.0643	24.0643	PAX7 up vs OCT4	2.77208	208.902	3.13704	17.7069	303.107	64.1923	1
ENSG00000174989	2.52984e-05	0.00448157	4.96476	4.96476	MYOG up vs OCT4	1.78537	13.8061	3.33942	16.2203	62.1842	14.3765	1	13958	2.52984e-05	0.000218972	10.169	10.169	PAX7 up vs OCT4	3.65684	28.2779	4.83363	16.2203	62.1842	14.3765	1
ENSG00000175087	7.42942e-07	0.0128012	2.35663	2.35663	MYOG up vs OCT4	1.2342	4.49986	2.82485	28.5273	43.7428	5.75013	1	13975	7.42942e-07	1.12569e-06	10.7536	10.7536	PAX7 up vs OCT4	5.6318	20.5334	7.82716	28.5273	43.7428	5.75013	1
ENSG00000175105	0.00411286	0.000668974	31.6965	31.6965	MYOG up vs OCT4	5.64981	177.823	4.2716	6.07395	66.2107	40.8779	1	13979	0.00411286	0.00425862	15.2121	15.2121	PAX7 up vs OCT4	2.71152	85.3428	3.36429	6.07395	66.2107	40.8779	1
ENSG00000175215	3.16387e-09	1.03097e-06	10697.8	10697.8	MYOG up vs OCT4	870.789	131424	7.88359	63.6005	1466.7	86.4791	1	14004	3.16387e-09	5.88691e-08	111586	111586	PAX7 up vs OCT4	9083.01	1370860	9.876	63.6005	1466.7	86.4791	1
ENSG00000175264	0.000103487	9.62521e-05	3.1019	3.1019	MYOG up vs OCT4	1.96055	4.90769	5.25912	12.7052	9.80159	2.89299	1	14011	0.000103487	0.000633679	2.52249	2.52249	PAX7 up vs OCT4	1.59434	3.99098	4.29853	12.7052	9.80159	2.89299	1
ENSG00000175265	6.01404e-05	0.000681711	415.441	415.441	MYOG up vs OCT4	20.3728	8471.65	4.26224	13.9826	465.899	124.95	1	14012	6.01404e-05	1.21538e-05	8427.13	8427.13	PAX7 up vs OCT4	413.258	171845	6.38996	13.9826	465.899	124.95	1
ENSG00000175309	0.000609368	0.000948051	3.6754	3.6754	MYOG up vs OCT4	1.86791	7.23192	4.09907	9.11531	15.3051	6.29646	1	14021	0.000609368	0.000622657	3.92658	3.92658	PAX7 up vs OCT4	1.99556	7.72617	4.30725	9.11531	15.3051	6.29646	1
ENSG00000175395	0.000529144	0.0015442	16.0603	16.0603	MYOG up vs OCT4	3.46605	74.4168	3.85934	9.37153	80.7555	32.3142	1	14041	0.000529144	0.000372921	26.6567	26.6567	PAX7 up vs OCT4	5.75292	123.516	4.56368	9.37153	80.7555	32.3142	1
ENSG00000175582	6.49191e-05	0.000201743	50.5259	50.5259	MYOG up vs OCT4	9.09467	280.699	4.87555	13.7971	148.696	40.4153	1	14075	6.49191e-05	0.00630114	12.8436	12.8436	PAX7 up vs OCT4	2.31185	71.353	3.17312	13.7971	148.696	40.4153	1
ENSG00000175595	8.10693e-05	1.56496e-05	3.57	3.57	MYOG up vs OCT4	2.31252	5.51126	6.24653	13.2685	9.16945	2.59152	1	14078	8.10693e-05	0.00144089	2.21035	2.21035	PAX7 up vs OCT4	1.43179	3.41227	3.89327	13.2685	9.16945	2.59152	1
ENSG00000175662	2.25057e-09	2.77196e-05	6.52024	6.52024	MYOG up vs OCT4	3.32266	12.795	5.92791	66.7514	111.188	6.24638	1	14089	2.25057e-09	0.0043891	2.88471	2.88471	PAX7 up vs OCT4	1.47002	5.66082	3.34958	66.7514	111.188	6.24638	1
ENSG00000175879	4.4673e-06	1.86146e-06	264.629	264.629	MYOG up vs OCT4	54.322	1289.13	7.50912	21.5526	198.048	34.4588	1	14133	4.4673e-06	5.04176e-06	168.599	168.599	PAX7 up vs OCT4	34.6093	821.326	6.90228	21.5526	198.048	34.4588	1
ENSG00000176371	0.000185074	0.00252407	7.02282	7.02282	MYOG up vs OCT4	2.22835	22.133	3.61924	11.4348	55.2241	18.1105	1	14236	0.000185074	5.36658e-05	20.0697	20.0697	PAX7 up vs OCT4	6.36815	63.2514	5.56899	11.4348	55.2241	18.1105	1
ENSG00000176438	1.90507e-07	3.77946e-08	4.6302	4.6302	MYOG up vs OCT4	3.36281	6.37525	10.214	35.0475	13.1391	1.40586	1	14255	1.90507e-07	7.13304e-05	2.25433	2.25433	PAX7 up vs OCT4	1.63727	3.10395	5.41723	35.0475	13.1391	1.40586	1
ENSG00000176749	7.45974e-08	5.8469e-08	124189	124189	MYOG up vs OCT4	9891.07	1559270	9.88114	40.2784	945.064	87.9873	1	14311	7.45974e-08	0.000573842	174.378	174.378	PAX7 up vs OCT4	13.8884	2189.43	4.34789	40.2784	945.064	87.9873	1
ENSG00000176909	6.92681e-09	9.75286e-08	6.71971	6.71971	MYOG up vs OCT4	4.38278	10.3027	9.50131	56.8723	38.0701	2.51023	1	14351	6.92681e-09	1.34132e-08	9.1459	9.1459	PAX7 up vs OCT4	5.9652	14.0226	11.0387	56.8723	38.0701	2.51023	1
ENSG00000176978	7.97978e-08	0.00010096	12.1466	12.1466	MYOG up vs OCT4	4.39376	33.5791	5.23408	39.8803	151.136	14.2116	1	14372	7.97978e-08	3.90392e-08	129.138	129.138	PAX7 up vs OCT4	46.7131	357.003	10.1889	39.8803	151.136	14.2116	1
ENSG00000177337	5.31789e-06	5.89842e-06	4.78088	4.78088	MYOG up vs OCT4	2.92961	7.80199	6.80936	20.9595	18.4258	3.29669	1	14445	5.31789e-06	0.000263563	2.97116	2.97116	PAX7 up vs OCT4	1.82066	4.84868	4.7392	20.9595	18.4258	3.29669	1
ENSG00000177599	4.32893e-06	2.37156e-05	3.07673	3.07673	MYOG up vs OCT4	2.06589	4.5822	6.01409	21.6612	12.5954	2.18053	1	14505	4.32893e-06	4.08413e-07	4.89073	4.89073	PAX7 up vs OCT4	3.2839	7.28379	8.49424	21.6612	12.5954	2.18053	1
ENSG00000177875	0.000132252	0.000297777	3.28132	3.28132	MYOG up vs OCT4	1.90934	5.63914	4.67728	12.1573	13.0647	4.02991	1	14564	0.000132252	0.00449496	2.33496	2.33496	PAX7 up vs OCT4	1.35868	4.01277	3.33796	12.1573	13.0647	4.02991	1
ENSG00000177981	2.6912e-09	1.22454e-09	61.7396	61.7396	MYOG up vs OCT4	31.6487	120.44	13.1509	65.0795	106.509	6.13722	1	14580	2.6912e-09	8.84504e-08	20.1101	20.1101	PAX7 up vs OCT4	10.3088	39.2304	9.57299	65.0795	106.509	6.13722	1
ENSG00000178057	0.000716252	0.000266054	14.3288	14.3288	MYOG up vs OCT4	4.32196	47.5052	4.73442	8.82772	46.4794	19.7444	1	14597	0.000716252	0.000670318	11.0393	11.0393	PAX7 up vs OCT4	3.32975	36.5991	4.2706	8.82772	46.4794	19.7444	1
ENSG00000178162	1.78066e-05	1.07611e-05	2.36867	2.36867	MYOG up vs OCT4	1.78209	3.14831	6.45959	17.2035	5.10494	1.11277	1	14616	1.78066e-05	2.6074e-05	2.21633	2.21633	PAX7 up vs OCT4	1.66748	2.94584	5.96165	17.2035	5.10494	1.11277	1
ENSG00000178229	1.64618e-05	0.00341164	2.49831	2.49831	MYOG up vs OCT4	1.42416	4.38262	3.47236	17.4297	20.1792	4.34154	1	14634	1.64618e-05	0.0061658	2.31522	2.31522	PAX7 up vs OCT4	1.31979	4.06144	3.18373	17.4297	20.1792	4.34154	1
ENSG00000178567	1.09574e-06	7.65256e-07	119.304	119.304	MYOG up vs OCT4	33.7782	421.381	8.07688	26.8723	156.825	21.8848	1	14688	1.09574e-06	1.58504e-07	225.307	225.307	PAX7 up vs OCT4	63.7905	795.782	9.15081	26.8723	156.825	21.8848	1
ENSG00000178662	0.00338924	0.00139485	10.2817	10.2817	MYOG up vs OCT4	2.88565	36.6337	3.90919	6.34922	37.5693	22.1893	1	14706	0.00338924	0.00543918	6.91989	6.91989	PAX7 up vs OCT4	1.94214	24.6557	3.24496	6.34922	37.5693	22.1893	1
ENSG00000178882	1.72472e-07	0.00268834	12.554	12.554	MYOG up vs OCT4	2.79345	56.4187	3.5885	35.5719	294.426	31.0384	1	14747	1.72472e-07	1.04807e-07	781.932	781.932	PAX7 up vs OCT4	173.992	3514.07	9.44876	35.5719	294.426	31.0384	1
ENSG00000178977	0.00779576	0.00303654	2.86582	2.86582	MYOG up vs OCT4	1.51736	5.41265	3.52912	5.21094	7.72253	5.55744	1	14769	0.00779576	0.00906502	2.44367	2.44367	PAX7 up vs OCT4	1.29385	4.61533	2.99497	5.21094	7.72253	5.55744	1
ENSG00000179008	0.00221625	0.000859478	2.39766	2.39766	MYOG up vs OCT4	1.52971	3.75807	4.14749	6.97793	5.16544	2.77595	1	14777	0.00221625	0.000933294	2.37718	2.37718	PAX7 up vs OCT4	1.51665	3.72597	4.10681	6.97793	5.16544	2.77595	1
ENSG00000179094	0.00088196	0.00169574	3.97554	3.97554	MYOG up vs OCT4	1.83815	8.59826	3.81351	8.46619	18.4644	8.1786	1	14802	0.00088196	0.0039132	3.4298	3.4298	PAX7 up vs OCT4	1.58582	7.41794	3.40552	8.46619	18.4644	8.1786	1
ENSG00000179104	1.26032e-08	4.94815e-06	15.0287	15.0287	MYOG up vs OCT4	6.51733	34.6557	6.91342	52.1861	133.516	9.59425	1	14805	1.26032e-08	7.86358e-08	44.1021	44.1021	PAX7 up vs OCT4	19.1252	101.698	9.65981	52.1861	133.516	9.59425	1
ENSG00000179241	3.44222e-07	5.85898e-06	37.6917	37.6917	MYOG up vs OCT4	12.1099	117.315	6.81331	32.0675	151.519	17.7187	1	14832	3.44222e-07	0.000727379	9.51959	9.51959	PAX7 up vs OCT4	3.05853	29.6295	4.23007	32.0675	151.519	17.7187	1
ENSG00000179388	7.14369e-05	0.000168458	28.0193	28.0193	MYOG up vs OCT4	6.70605	117.071	4.96816	13.5675	101.67	28.101	1	14860	7.14369e-05	0.000102039	33.3664	33.3664	PAX7 up vs OCT4	7.98581	139.412	5.22851	13.5675	101.67	28.101	1
ENSG00000179456	8.35239e-09	2.17358e-09	3177640000000000	3177640000000000	MYOG up vs OCT4	7640590000000	1.32154e+18	12.6164	55.3667	7379.6	499.822	1	14877	8.35239e-09	0.00741588	6324.23	6324.23	PAX7 up vs OCT4	15.2066	2630180	3.09344	55.3667	7379.6	499.822	1
ENSG00000179542	2.72342e-07	2.1654e-07	1033.57	1033.57	MYOG up vs OCT4	197.203	5417.12	8.9306	33.2194	334.107	37.716	1	14888	2.72342e-07	0.00864861	10.4396	10.4396	PAX7 up vs OCT4	1.99186	54.7158	3.01806	33.2194	334.107	37.716	1
ENSG00000179743	1.10489e-05	0.000193613	2.24984	2.24984	MYOG up vs OCT4	1.58075	3.20214	4.89663	18.6152	8.49973	1.71225	1	14917	1.10489e-05	0.000107732	2.36579	2.36579	PAX7 up vs OCT4	1.66222	3.36717	5.2001	18.6152	8.49973	1.71225	1
ENSG00000179818	2.32402e-09	1.94079e-07	2.28054	2.28054	MYOG up vs OCT4	1.87635	2.77179	9.00746	66.4482	9.26843	0.523063	1	14930	2.32402e-09	8.90666e-08	2.40057	2.40057	PAX7 up vs OCT4	1.97511	2.91767	9.56788	66.4482	9.26843	0.523063	1
ENSG00000179833	1.62986e-06	1.54854e-06	168.117	168.117	MYOG up vs OCT4	40.1273	704.344	7.62455	25.2673	190.064	28.208	1	14934	1.62986e-06	8.23718e-07	220.613	220.613	PAX7 up vs OCT4	52.6574	924.28	8.02886	25.2673	190.064	28.208	1
ENSG00000179981	3.68796e-15	9.52267e-07	14.599	14.599	MYOG up vs OCT4	7.10497	29.9975	7.9348	414.969	788.792	7.12816	1	14971	3.68796e-15	7.87378e-09	48.4122	48.4122	PAX7 up vs OCT4	23.561	99.4756	11.4829	414.969	788.792	7.12816	1
ENSG00000180011	1.70889e-08	0.00961203	16.1362	16.1362	MYOG up vs OCT4	2.18723	119.044	2.96618	49.9419	731.023	54.8905	1	14976	1.70889e-08	0.000120601	124.011	124.011	PAX7 up vs OCT4	16.8095	914.885	5.14123	49.9419	731.023	54.8905	1
ENSG00000180178	2.64432e-05	4.88468e-06	25.8869	25.8869	MYOG up vs OCT4	9.50391	70.5111	6.9211	16.0996	59.2474	13.8002	1	15006	2.64432e-05	0.000379624	8.51009	8.51009	PAX7 up vs OCT4	3.12433	23.1799	4.55471	16.0996	59.2474	13.8002	1
ENSG00000180530	0.000630166	2.66252e-05	5291430	5291430	MYOG up vs OCT4	20656.3	1355480000	5.95011	9.05509	1020.74	422.719	1	15073	0.000630166	0.00509029	5050.46	5050.46	PAX7 up vs OCT4	19.7157	1293750	3.27731	9.05509	1020.74	422.719	1
ENSG00000180628	7.07697e-05	0.000197731	358.673	358.673	MYOG up vs OCT4	27.5557	4668.59	4.88585	13.5899	328.01	90.511	1	15090	7.07697e-05	0.000124139	479.031	479.031	PAX7 up vs OCT4	36.8024	6235.2	5.12618	13.5899	328.01	90.511	1
ENSG00000180801	4.69166e-06	0.00187768	17.1036	17.1036	MYOG up vs OCT4	3.42581	85.3906	3.76367	21.3845	202.643	35.5357	1	15125	4.69166e-06	1.44355e-06	325.491	325.491	PAX7 up vs OCT4	65.1952	1625.04	7.66887	21.3845	202.643	35.5357	1
ENSG00000180875	6.25005e-07	0.00241586	5.64716	5.64716	MYOG up vs OCT4	2.04956	15.5596	3.64062	29.2915	110.281	14.1186	1	15141	6.25005e-07	1.94509e-07	72.4142	72.4142	PAX7 up vs OCT4	26.2818	199.523	9.0059	29.2915	110.281	14.1186	1
ENSG00000180891	2.33726e-08	2.62802e-09	80.8247	80.8247	MYOG up vs OCT4	38.0893	171.509	12.4436	47.7269	99.0131	7.77966	1	15146	2.33726e-08	1.89351e-07	24.1805	24.1805	PAX7 up vs OCT4	11.3953	51.3107	9.02483	47.7269	99.0131	7.77966	1
ENSG00000180979	6.53956e-05	0.00858787	3.187	3.187	MYOG up vs OCT4	1.40697	7.21904	3.02152	13.7794	33.7634	9.18853	1	15165	6.53956e-05	0.000100941	7.44747	7.44747	PAX7 up vs OCT4	3.28785	16.8696	5.23418	13.7794	33.7634	9.18853	1
ENSG00000181085	8.34776e-06	9.56928e-07	850.077	850.077	MYOG up vs OCT4	138.75	5208.16	7.93164	19.4872	234.675	45.1596	1	15192	8.34776e-06	0.000306695	52.7208	52.7208	PAX7 up vs OCT4	8.60511	323.004	4.66234	19.4872	234.675	45.1596	1
ENSG00000181744	2.02625e-07	0.00209247	338.685	338.685	MYOG up vs OCT4	11.9313	9613.98	3.71076	34.7258	1424.85	153.868	1	15295	2.02625e-07	8.17576e-08	3680450	3680450	PAX7 up vs OCT4	129656	104474000	9.63101	34.7258	1424.85	153.868	1
ENSG00000181751	1.57046e-05	3.39433e-05	772.88	772.88	MYOG up vs OCT4	67.5819	8838.8	5.81685	17.5665	382.303	81.612	1	15296	1.57046e-05	0.000696592	129.096	129.096	PAX7 up vs OCT4	11.2884	1476.37	4.25152	17.5665	382.303	81.612	1
ENSG00000181754	2.86865e-06	0.000162823	2.48045	2.48045	MYOG up vs OCT4	1.68214	3.6576	4.98569	23.1233	12.7829	2.07305	1	15298	2.86865e-06	0.000571275	2.2092	2.2092	PAX7 up vs OCT4	1.4982	3.25763	4.35012	23.1233	12.7829	2.07305	1
ENSG00000181804	6.41848e-07	3.55116e-05	2.56992	2.56992	MYOG up vs OCT4	1.81583	3.63718	5.79221	29.1728	12.899	1.6581	1	15314	6.41848e-07	2.13845e-06	3.35212	3.35212	PAX7 up vs OCT4	2.36851	4.74422	7.42282	29.1728	12.899	1.6581	1
ENSG00000181904	2.75982e-05	9.0751e-05	347.965	347.965	MYOG up vs OCT4	32.9236	3677.61	5.29004	15.9837	325.704	76.4146	1	15330	2.75982e-05	2.14052e-05	825.558	825.558	PAX7 up vs OCT4	78.1121	8725.22	6.07102	15.9837	325.704	76.4146	1
ENSG00000182013	5.04817e-05	3.63541e-05	213751	213751	MYOG up vs OCT4	2313.37	19750300	5.77944	14.4146	1082.28	281.56	1	15354	5.04817e-05	0.00272559	2009.99	2009.99	PAX7 up vs OCT4	21.7536	185720	3.58179	14.4146	1082.28	281.56	1
ENSG00000182054	5.25157e-07	1.93642e-07	171873000000	171873000000	MYOG up vs OCT4	377634000	78224600000000	9.00905	30.0789	4129.88	514.88	1	15362	5.25157e-07	5.38181e-07	23032100000	23032100000	PAX7 up vs OCT4	50605400	10482600000000	8.30913	30.0789	4129.88	514.88	1
ENSG00000182405	0.000673275	0.000291557	3.51598	3.51598	MYOG up vs OCT4	1.98508	6.22749	4.68798	8.93712	10.7042	4.49148	1	15455	0.000673275	0.00331296	2.54753	2.54753	PAX7 up vs OCT4	1.43831	4.51218	3.48666	8.93712	10.7042	4.49148	1
ENSG00000182580	7.19121e-06	0.000433397	36.2498	36.2498	MYOG up vs OCT4	6.58849	199.446	4.48817	19.9644	212.74	39.9599	1	15494	7.19121e-06	6.76174e-07	682.826	682.826	PAX7 up vs OCT4	124.105	3756.9	8.15804	19.9644	212.74	39.9599	1
ENSG00000182636	2.45826e-08	4.85578e-07	182603	182603	MYOG up vs OCT4	8373.29	3982170	8.37781	47.3784	1649.72	130.575	1	15512	2.45826e-08	6.11566e-09	22233400	22233400	PAX7 up vs OCT4	1019520	484861000	11.6985	47.3784	1649.72	130.575	1
ENSG00000182670	1.62313e-05	1.85826e-06	7.02538e+16	7.02538e+16	MYOG up vs OCT4	1162670000000	4.24506e+21	7.51019	17.4706	7760.76	1665.82	1	15518	1.62313e-05	3.84429e-05	7872720000000	7872720000000	PAX7 up vs OCT4	130290000	4.75707e+17	5.74905	17.4706	7760.76	1665.82	1
ENSG00000182916	4.87531e-06	7.87751e-07	1.85314e+17	1.85314e+17	MYOG up vs OCT4	5015240000000	6.84738e+21	8.05796	21.2535	8616.47	1520.31	1	15576	4.87531e-06	0.00295778	38925200	38925200	PAX7 up vs OCT4	1053.45	1438290000000	3.54193	21.2535	8616.47	1520.31	1
ENSG00000182923	0.00102994	0.00103133	3.17669	3.17669	MYOG up vs OCT4	1.73096	5.82993	4.05757	8.20304	11.0835	5.06681	1	15579	0.00102994	0.00762992	2.40423	2.40423	PAX7 up vs OCT4	1.31005	4.4123	3.07951	8.20304	11.0835	5.06681	1
ENSG00000183044	1.13307e-06	2.25305e-06	352.658	352.658	MYOG up vs OCT4	64.9661	1914.34	7.39051	26.7336	280.387	39.3307	1	15611	1.13307e-06	7.59312e-05	71.7447	71.7447	PAX7 up vs OCT4	13.2167	389.454	5.38411	26.7336	280.387	39.3307	1
ENSG00000183160	2.70359e-09	5.19091e-06	234849	234849	MYOG up vs OCT4	5106.2	10801400	6.88496	65.0371	3493.85	201.454	1	15643	2.70359e-09	7.63628e-10	41021200000	41021200000	PAX7 up vs OCT4	891902000	1886690000000	13.6051	65.0371	3493.85	201.454	1
ENSG00000183283	3.73592e-05	4.72523e-05	32.3698	32.3698	MYOG up vs OCT4	8.69302	120.534	5.63741	15.1811	96.1722	23.7562	1	15670	3.73592e-05	3.13032e-06	84.2818	84.2818	PAX7 up vs OCT4	22.6342	313.836	7.18884	15.1811	96.1722	23.7562	1
ENSG00000183354	1.35251e-05	8.69256e-05	7.67225	7.67225	MYOG up vs OCT4	3.38761	17.3761	5.31271	18.0062	44.1032	9.18503	1	15692	1.35251e-05	0.000269596	6.13027	6.13027	PAX7 up vs OCT4	2.70676	13.8838	4.7277	18.0062	44.1032	9.18503	1
ENSG00000183386	0.000236993	8.94103e-05	32.6537	32.6537	MYOG up vs OCT4	8.03238	132.746	5.29787	10.9232	78.7465	27.0341	1	15696	0.000236993	4.8797e-05	40.3655	40.3655	PAX7 up vs OCT4	9.92937	164.096	5.62009	10.9232	78.7465	27.0341	1
ENSG00000183496	4.62421e-08	1.09226e-05	303.794	303.794	MYOG up vs OCT4	45.9543	2008.32	6.45105	43.2089	564.923	49.0283	1	15724	4.62421e-08	2.98705e-08	10025.1	10025.1	PAX7 up vs OCT4	1516.47	66273.6	10.3969	43.2089	564.923	49.0283	1
ENSG00000183621	2.59517e-06	1.11387e-06	5.81508	5.81508	MYOG up vs OCT4	3.60194	9.38806	7.83392	23.4916	19.7535	3.15328	1	15757	2.59517e-06	1.57335e-06	5.53535	5.53535	PAX7 up vs OCT4	3.42867	8.93645	7.61454	23.4916	19.7535	3.15328	1
ENSG00000183628	1.87576e-06	1.71513e-07	10.1075	10.1075	MYOG up vs OCT4	5.87753	17.3816	9.09478	24.7192	26.6284	4.03962	1	15760	1.87576e-06	0.00251162	2.51224	2.51224	PAX7 up vs OCT4	1.46088	4.32025	3.62166	24.7192	26.6284	4.03962	1
ENSG00000183688	4.02498e-08	0.00255846	48.749	48.749	MYOG up vs OCT4	4.92119	482.904	3.61264	44.0949	849.837	72.2734	1	15785	4.02498e-08	1.85197e-07	16751.8	16751.8	PAX7 up vs OCT4	1691.08	165942	9.04048	44.0949	849.837	72.2734	1
ENSG00000183691	7.77301e-05	0.00160884	1216.12	1216.12	MYOG up vs OCT4	23.5659	62758.5	3.83926	13.3674	761.948	213.753	1	15787	7.77301e-05	2.57745e-05	62448.3	62448.3	PAX7 up vs OCT4	1210.11	3222660	5.96803	13.3674	761.948	213.753	1
ENSG00000183722	0.000117308	4.72739e-05	5212600000000000	5212600000000000	MYOG up vs OCT4	5947460000	4.56854e+21	5.63716	12.4229	8525.42	2573.49	1	15795	0.000117308	0.00169871	42669200000	42669200000	PAX7 up vs OCT4	48684.5	3.73971e+16	3.81265	12.4229	8525.42	2573.49	1
ENSG00000183762	4.07218e-09	6.48355e-07	81064.1	81064.1	MYOG up vs OCT4	4272.04	1538230	8.18571	61.3563	1947.93	119.054	1	15809	4.07218e-09	2.78829e-09	26923700	26923700	PAX7 up vs OCT4	1418870	510891000	12.3901	61.3563	1947.93	119.054	1
ENSG00000183891	0.000280154	0.00968404	2.59467	2.59467	MYOG up vs OCT4	1.30665	5.15232	2.96251	10.5864	18.2588	6.46778	1	15848	0.000280154	0.00075658	3.87729	3.87729	PAX7 up vs OCT4	1.95257	7.69928	4.21057	10.5864	18.2588	6.46778	1
ENSG00000183955	7.65213e-05	0.00379252	6.1393	6.1393	MYOG up vs OCT4	1.98176	19.0189	3.42079	13.4043	62.8127	17.5725	1	15861	7.65213e-05	6.86227e-06	35.3442	35.3442	PAX7 up vs OCT4	11.4091	109.493	6.72039	13.4043	62.8127	17.5725	1
ENSG00000184677	0.00015153	0.00976165	3.68445	3.68445	MYOG up vs OCT4	1.43993	9.42768	2.95858	11.8609	38.3729	12.1322	1	16039	0.00015153	0.00542897	4.18188	4.18188	PAX7 up vs OCT4	1.63433	10.7005	3.24588	11.8609	38.3729	12.1322	1
ENSG00000184702	4.15401e-06	1.85105e-06	1240.67	1240.67	MYOG up vs OCT4	164.413	9362.13	7.51262	21.8042	326.416	56.1388	1	16044	4.15401e-06	0.000572579	61.7857	61.7857	PAX7 up vs OCT4	8.18782	466.237	4.34898	21.8042	326.416	56.1388	1
ENSG00000184708	1.66516e-05	0.00766277	2.49718	2.49718	MYOG up vs OCT4	1.32486	4.70683	3.0774	17.3966	25.6171	5.52201	1	16045	1.66516e-05	0.000220829	4.20447	4.20447	PAX7 up vs OCT4	2.23066	7.92484	4.82932	17.3966	25.6171	5.52201	1
ENSG00000184985	0.00058767	0.00920468	5.8175	5.8175	MYOG up vs OCT4	1.65624	20.4338	2.98746	9.18067	53.1084	21.693	1	16113	0.00058767	0.000103431	21.7064	21.7064	PAX7 up vs OCT4	6.17982	76.2431	5.22142	9.18067	53.1084	21.693	1
ENSG00000185008	0.000287563	0.00103401	2.848	2.848	MYOG up vs OCT4	1.64321	4.93613	4.05629	10.5345	11.6781	4.15709	1	16123	0.000287563	0.00536364	2.31414	2.31414	PAX7 up vs OCT4	1.33519	4.01084	3.25179	10.5345	11.6781	4.15709	1
ENSG00000185019	0.000411505	0.00525074	2.01499	2.01499	MYOG up vs OCT4	1.27487	3.18479	3.26217	9.83981	7.55741	2.88017	1	16128	0.000411505	0.0015918	2.28343	2.28343	PAX7 up vs OCT4	1.44471	3.60906	3.84447	9.83981	7.55741	2.88017	1
ENSG00000185052	1.67958e-07	7.88641e-08	62808.6	62808.6	MYOG up vs OCT4	5483.96	719356	9.65766	35.713	778.173	81.7113	1	16143	1.67958e-07	0.000281128	217.874	217.874	PAX7 up vs OCT4	19.0231	2495.34	4.70644	35.713	778.173	81.7113	1
ENSG00000185189	9.33567e-07	2.4604e-07	1426.02	1426.02	MYOG up vs OCT4	247.601	8212.89	8.84154	27.5442	309.458	42.1312	1	16182	9.33567e-07	0.00179399	22.4182	22.4182	PAX7 up vs OCT4	3.89251	129.114	3.78596	27.5442	309.458	42.1312	1
ENSG00000185269	2.02224e-08	0.00477119	9.76453	9.76453	MYOG up vs OCT4	2.24987	42.3784	3.30888	48.7395	384.904	29.6144	1	16204	2.02224e-08	0.000128517	33.7128	33.7128	PAX7 up vs OCT4	7.76786	146.315	5.10816	48.7395	384.904	29.6144	1
ENSG00000185418	4.51455e-05	7.41945e-06	39.9715	39.9715	MYOG up vs OCT4	12.3101	129.789	6.67474	14.6955	74.7095	19.0644	1	16239	4.51455e-05	0.000918745	9.71356	9.71356	PAX7 up vs OCT4	2.99151	31.5403	4.11456	14.6955	74.7095	19.0644	1
ENSG00000185551	3.00799e-05	2.2709e-05	206.611	206.611	MYOG up vs OCT4	31.471	1356.43	6.03815	15.7522	204.439	48.6692	1	16268	3.00799e-05	0.000392093	54.972	54.972	PAX7 up vs OCT4	8.37333	360.898	4.53846	15.7522	204.439	48.6692	1
ENSG00000185585	0.00168388	0.00881691	1923.68	1923.68	MYOG up vs OCT4	9.06741	408113	3.0086	7.40322	778.758	394.469	1	16274	0.00168388	0.00175175	13976.6	13976.6	PAX7 up vs OCT4	65.8799	2965170	3.79761	7.40322	778.758	394.469	1
ENSG00000185619	2.22149e-08	2.08955e-08	750.34	750.34	MYOG up vs OCT4	200.177	2812.56	10.6797	48.08	307.661	23.9961	1	16283	2.22149e-08	1.34327e-06	119.385	119.385	PAX7 up vs OCT4	31.8496	447.5	7.71448	48.08	307.661	23.9961	1
ENSG00000185880	2.96371e-07	0.000811206	2.19984	2.19984	MYOG up vs OCT4	1.47108	3.28963	4.17606	32.7994	19.4647	2.22543	1	16356	2.96371e-07	6.15973e-06	3.59913	3.59913	PAX7 up vs OCT4	2.40681	5.38212	6.78381	32.7994	19.4647	2.22543	1
ENSG00000186318	1.35153e-07	0.0045055	4.55444	4.55444	MYOG up vs OCT4	1.72921	11.9956	3.33682	36.8874	126.797	12.8903	1	16489	1.35153e-07	0.0010636	6.27569	6.27569	PAX7 up vs OCT4	2.38273	16.5291	4.04239	36.8874	126.797	12.8903	1
ENSG00000186654	0.000425939	0.000191102	4.61922	4.61922	MYOG up vs OCT4	2.37511	8.98366	4.90333	9.77469	15.8515	6.08134	1	16573	0.000425939	0.00367021	2.9228	2.9228	PAX7 up vs OCT4	1.50285	5.68438	3.43676	9.77469	15.8515	6.08134	1
ENSG00000186666	0.000284696	0.000579265	3.34707	3.34707	MYOG up vs OCT4	1.85005	6.05547	4.3432	10.5544	13.5972	4.8311	1	16576	0.000284696	0.000138546	4.09603	4.09603	PAX7 up vs OCT4	2.26402	7.41046	5.06916	10.5544	13.5972	4.8311	1
ENSG00000186787	0.00707387	0.00253353	3.63027	3.63027	MYOG up vs OCT4	1.69829	7.76005	3.61742	5.33764	11.2902	7.93203	1	16594	0.00707387	0.00896736	2.91349	2.91349	PAX7 up vs OCT4	1.36298	6.22788	3.00029	5.33764	11.2902	7.93203	1
ENSG00000187079	7.46127e-08	1.51788e-07	4883.75	4883.75	MYOG up vs OCT4	679.893	35080.6	9.18168	40.2772	573.912	53.4339	1	16673	7.46127e-08	0.000226005	86.1856	86.1856	PAX7 up vs OCT4	11.9983	619.082	4.81749	40.2772	573.912	53.4339	1
ENSG00000187189	3.18466e-06	0.00235891	5.9418	5.9418	MYOG up vs OCT4	2.1002	16.8103	3.65226	22.7444	90.1596	14.8651	1	16705	3.18466e-06	1.11928e-07	98.1914	98.1914	PAX7 up vs OCT4	34.707	277.799	9.40095	22.7444	90.1596	14.8651	1
ENSG00000187486	5.20508e-07	1.41911e-05	4.55768	4.55768	MYOG up vs OCT4	2.7286	7.61287	6.30184	30.1197	29.0549	3.61743	1	16740	5.20508e-07	0.0022905	2.41701	2.41701	PAX7 up vs OCT4	1.44702	4.03723	3.66662	30.1197	29.0549	3.61743	1
ENSG00000187634	1.30411e-05	1.25141e-05	740.061	740.061	MYOG up vs OCT4	81.2244	6742.93	6.3733	18.1147	324.127	67.0988	1	16783	1.30411e-05	0.00413681	33.1877	33.1877	PAX7 up vs OCT4	3.64247	302.383	3.37844	18.1147	324.127	67.0988	1
ENSG00000187792	6.0281e-05	0.000420121	5.83446	5.83446	MYOG up vs OCT4	2.53212	13.4436	4.50378	13.9769	35.6932	9.57648	1	16830	6.0281e-05	1.89599e-05	11.068	11.068	PAX7 up vs OCT4	4.80346	25.5027	6.13871	13.9769	35.6932	9.57648	1
ENSG00000188176	5.41438e-06	7.64752e-07	70.7496	70.7496	MYOG up vs OCT4	22.9941	217.686	8.07731	20.8991	96.7559	17.3613	1	16936	5.41438e-06	0.0035468	6.17794	6.17794	PAX7 up vs OCT4	2.00787	19.0086	3.45343	20.8991	96.7559	17.3613	1
ENSG00000188517	9.03518e-07	2.92931e-07	2.64266e+27	2.64266e+27	MYOG up vs OCT4	5.24698e+20	1.33099e+34	8.72091	27.6832	24163.6	3273.24	1	17022	9.03518e-07	0.00481314	24605700000	24605700000	PAX7 up vs OCT4	4885.44	1.23928e+17	3.30462	27.6832	24163.6	3273.24	1
ENSG00000188613	7.86295e-07	1.29823e-05	2.58991	2.58991	MYOG up vs OCT4	1.88197	3.56414	6.35239	28.2804	10.5676	1.40128	1	17045	7.86295e-07	3.03609e-05	2.4122	2.4122	PAX7 up vs OCT4	1.75284	3.31959	5.87789	28.2804	10.5676	1.40128	1
ENSG00000188636	6.07185e-11	7.71844e-05	12.1632	12.1632	MYOG up vs OCT4	4.51657	32.7556	5.37544	110.664	398.056	13.4887	1	17050	6.07185e-11	1.8825e-10	1082.41	1082.41	PAX7 up vs OCT4	401.931	2914.93	15.0327	110.664	398.056	13.4887	1
ENSG00000188738	0.00158021	0.00999492	3.07764	3.07764	MYOG up vs OCT4	1.36491	6.93955	2.94696	7.50376	18.1814	9.08615	1	17084	0.00158021	0.000184268	6.53766	6.53766	PAX7 up vs OCT4	2.89941	14.7413	4.92202	7.50376	18.1814	9.08615	1
ENSG00000189060	0.000607279	0.0012751	6.29315e+22	6.29315e+22	MYOG up vs OCT4	32098100000	1.23383e+35	3.95323	9.12149	26783	11010.9	1	17176	0.000607279	0.0094006	1.47726e+17	1.47726e+17	PAX7 up vs OCT4	75347.4	2.89631e+29	2.97711	9.12149	26783	11010.9	1
ENSG00000189108	3.68449e-10	0.000139827	2.56592	2.56592	MYOG up vs OCT4	1.72586	3.81488	5.06439	86.1165	49.6437	2.16177	1	17186	3.68449e-10	1.54865e-10	17.0473	17.0473	PAX7 up vs OCT4	11.4662	25.3451	15.2418	86.1165	49.6437	2.16177	1
ENSG00000196141	1.56833e-05	0.00548179	1908.54	1908.54	MYOG up vs OCT4	13.2814	274257	3.24115	17.5704	1589.23	339.185	1	17303	1.56833e-05	1.14341e-05	3185910	3185910	PAX7 up vs OCT4	22170.5	457816000	6.42484	17.5704	1589.23	339.185	1
ENSG00000196295	0.00167874	0.000473116	2.81391	2.81391	MYOG up vs OCT4	1.71326	4.62166	4.44425	7.40804	6.6845	3.38374	1	17361	0.00167874	0.00827122	2.02925	2.02925	PAX7 up vs OCT4	1.23552	3.33292	3.03995	7.40804	6.6845	3.38374	1
ENSG00000196418	4.47826e-05	0.00285534	31129.1	31129.1	MYOG up vs OCT4	63.4366	15275400	3.55911	14.716	2070.52	527.622	1	17415	4.47826e-05	0.000119384	3141670	3141670	PAX7 up vs OCT4	6402.27	1541650000	5.14651	14.716	2070.52	527.622	1
ENSG00000196459	0.00083392	0.00067149	6.90684	6.90684	MYOG up vs OCT4	2.63215	18.1237	4.26973	8.56252	29.2068	12.7912	1	17432	0.00083392	0.0033101	4.84661	4.84661	PAX7 up vs OCT4	1.84701	12.7176	3.48708	8.56252	29.2068	12.7912	1
ENSG00000196526	5.2096e-08	0.000111658	117.535	117.535	MYOG up vs OCT4	16.5414	835.148	5.1814	42.4609	598.379	52.8467	1	17452	5.2096e-08	7.15522e-09	41717.8	41717.8	PAX7 up vs OCT4	5871.19	296426	11.5642	42.4609	598.379	52.8467	1
ENSG00000196547	7.2724e-05	0.00234035	2.45029	2.45029	MYOG up vs OCT4	1.45315	4.13165	3.65611	13.525	13.5317	3.75185	1	17461	7.2724e-05	2.23688e-05	4.40243	4.40243	PAX7 up vs OCT4	2.61087	7.42334	6.04653	13.525	13.5317	3.75185	1
ENSG00000196569	2.68741e-08	1.61619e-08	221695000	221695000	MYOG up vs OCT4	5149550	9544260000	10.8866	46.7688	2426.46	194.558	1	17471	2.68741e-08	2.08721e-06	503419	503419	PAX7 up vs OCT4	11693.5	21672900	7.43787	46.7688	2426.46	194.558	1
ENSG00000196576	4.35317e-05	0.000663289	1034	1034	MYOG up vs OCT4	32.4954	32902	4.27584	14.7879	648.893	164.549	1	17473	4.35317e-05	0.000299556	1974.33	1974.33	PAX7 up vs OCT4	62.0469	62823.3	4.67427	14.7879	648.893	164.549	1
ENSG00000196604	4.84537e-07	1.06248e-07	29704.6	29704.6	MYOG up vs OCT4	2902.56	303995	9.43881	30.4494	603.639	74.3414	1	17484	4.84537e-07	2.62395e-05	665.929	665.929	PAX7 up vs OCT4	65.0707	6815.07	5.95816	30.4494	603.639	74.3414	1
ENSG00000196628	5.54407e-10	5.05895e-07	124.986	124.986	MYOG up vs OCT4	36.4448	428.636	8.35039	81.3271	452.722	20.875	1	17490	5.54407e-10	7.58984e-10	2617.37	2617.37	PAX7 up vs OCT4	763.199	8976.18	13.6111	81.3271	452.722	20.875	1
ENSG00000196814	9.66781e-09	1.18189e-06	80.7463	80.7463	MYOG up vs OCT4	24.3058	268.248	7.79599	54.216	286.426	19.8115	1	17555	9.66781e-09	2.39026e-08	385.798	385.798	PAX7 up vs OCT4	116.13	1281.66	10.5726	54.216	286.426	19.8115	1
ENSG00000196834	2.30624e-06	4.04157e-07	173.66	173.66	MYOG up vs OCT4	47.661	632.759	8.50132	23.9319	146.64	22.9778	1	17559	2.30624e-06	8.16244e-05	25.6089	25.6089	PAX7 up vs OCT4	7.02836	93.3101	5.34589	23.9319	146.64	22.9778	1
ENSG00000196914	0.000253374	0.0058456	10.8879	10.8879	MYOG up vs OCT4	2.2303	53.1524	3.20978	10.7878	99.3942	34.551	1	17580	0.000253374	4.03603e-05	70.5892	70.5892	PAX7 up vs OCT4	14.4597	344.602	5.72263	10.7878	99.3942	34.551	1
ENSG00000196981	0.000259082	0.000144433	3.813	3.813	MYOG up vs OCT4	2.16678	6.70992	5.04761	10.7429	12.5768	4.39016	1	17609	0.000259082	0.00110132	2.90759	2.90759	PAX7 up vs OCT4	1.65228	5.11663	4.02524	10.7429	12.5768	4.39016	1
ENSG00000196998	4.44306e-06	0.00234464	2.54678	2.54678	MYOG up vs OCT4	1.47655	4.39274	3.65522	21.5714	23.494	4.08423	1	17613	4.44306e-06	0.000106578	3.78626	3.78626	PAX7 up vs OCT4	2.19516	6.53063	5.20574	21.5714	23.494	4.08423	1
ENSG00000197043	0.00118133	0.00390366	9.1363e+21	9.1363e+21	MYOG up vs OCT4	166246000	5.02099e+35	3.40671	7.97477	29255.9	13757.1	1	17626	0.00118133	0.000411083	1.26827e+29	1.26827e+29	PAX7 up vs OCT4	2307770000000000	6.96996e+42	4.5147	7.97477	29255.9	13757.1	1
ENSG00000197093	2.77278e-05	0.00221852	2.31602	2.31602	MYOG up vs OCT4	1.42433	3.76596	3.6822	15.971	13.8345	3.24834	1	17648	2.77278e-05	0.000168635	3.10507	3.10507	PAX7 up vs OCT4	1.90958	5.04898	4.96762	15.971	13.8345	3.24834	1
ENSG00000197380	5.13364e-05	4.78097e-06	24.5202	24.5202	MYOG up vs OCT4	9.17043	65.563	6.93388	14.3727	50.9552	13.2948	1	17743	5.13364e-05	0.000269527	8.86011	8.86011	PAX7 up vs OCT4	3.31364	23.6905	4.72783	14.3727	50.9552	13.2948	1
ENSG00000197461	6.66851e-06	0.000126765	5431.93	5431.93	MYOG up vs OCT4	150.892	195543	5.11529	20.2095	951.163	176.494	1	17771	6.66851e-06	6.18939e-05	10245.3	10245.3	PAX7 up vs OCT4	284.602	368818	5.49271	20.2095	951.163	176.494	1
ENSG00000197566	8.49444e-05	0.000524561	8.46406	8.46406	MYOG up vs OCT4	3.00255	23.8598	4.39266	13.1593	51.8024	14.7621	1	17806	8.49444e-05	9.97144e-05	12.783	12.783	PAX7 up vs OCT4	4.53464	36.0346	5.24059	13.1593	51.8024	14.7621	1
ENSG00000197603	0.000338219	0.00362893	6.15315	6.15315	MYOG up vs OCT4	1.99751	18.9542	3.44227	10.2159	47.3936	17.3969	1	17823	0.000338219	0.000150279	14.2035	14.2035	PAX7 up vs OCT4	4.61092	43.7525	5.02708	10.2159	47.3936	17.3969	1
ENSG00000197620	2.36514e-05	2.38055e-05	2.46545	2.46545	MYOG up vs OCT4	1.79042	3.39497	6.01199	16.4053	6.15402	1.40672	1	17830	2.36514e-05	0.000248651	2.04578	2.04578	PAX7 up vs OCT4	1.48566	2.81708	4.76882	16.4053	6.15402	1.40672	1
ENSG00000197702	1.30927e-06	0.00637516	28.8755	28.8755	MYOG up vs OCT4	3.00396	277.565	3.16741	26.1421	490.707	70.3903	1	17853	1.30927e-06	0.00811369	25.4744	25.4744	PAX7 up vs OCT4	2.65014	244.872	3.04938	26.1421	490.707	70.3903	1
ENSG00000197724	4.34383e-07	2.92829e-05	29.4516	29.4516	MYOG up vs OCT4	8.67304	100.011	5.89774	30.9585	169.585	20.5418	1	17862	4.34383e-07	1.00359e-06	92.9173	92.9173	PAX7 up vs OCT4	27.3627	315.525	7.90092	30.9585	169.585	20.5418	1
ENSG00000197776	2.4004e-05	9.86802e-06	2.98096	2.98096	MYOG up vs OCT4	2.08464	4.26265	6.5094	16.3645	7.67184	1.75804	1	17881	2.4004e-05	3.9088e-05	2.61992	2.61992	PAX7 up vs OCT4	1.83217	3.74639	5.74001	16.3645	7.67184	1.75804	1
ENSG00000197813	0.000423844	0.000483585	3.04919	3.04919	MYOG up vs OCT4	1.78401	5.2116	4.4333	9.78398	10.3027	3.94883	1	17892	0.000423844	0.000480397	3.05173	3.05173	PAX7 up vs OCT4	1.78549	5.21594	4.43661	9.78398	10.3027	3.94883	1
ENSG00000197852	1.09465e-08	7.54836e-09	1778.63	1778.63	MYOG up vs OCT4	445.327	7103.81	11.5187	53.2561	374.304	26.3565	1	17908	1.09465e-08	2.61795e-06	114.605	114.605	PAX7 up vs OCT4	28.6944	457.73	7.29804	53.2561	374.304	26.3565	1
ENSG00000198075	0.00166278	0.00331234	3.40528	3.40528	MYOG up vs OCT4	1.61008	7.20208	3.48676	7.42311	15.2646	7.71138	1	17995	0.00166278	0.000242892	5.36592	5.36592	PAX7 up vs OCT4	2.53711	11.3488	4.78075	7.42311	15.2646	7.71138	1
ENSG00000198162	4.93121e-05	8.62659e-06	12401.9	12401.9	MYOG up vs OCT4	587.375	261856	6.58708	14.4732	493.442	127.851	1	18030	4.93121e-05	0.000486604	566.379	566.379	PAX7 up vs OCT4	26.8247	11958.6	4.43019	14.4732	493.442	127.851	1
ENSG00000198169	9.59329e-05	0.00248118	3.37591	3.37591	MYOG up vs OCT4	1.65169	6.90007	3.6276	12.8781	24.1209	7.02379	1	18032	9.59329e-05	0.000131775	5.5227	5.5227	PAX7 up vs OCT4	2.70202	11.2879	5.09516	12.8781	24.1209	7.02379	1
ENSG00000198420	0.0112021	0.0018874	571077	571077	MYOG up vs OCT4	312.152	1044770000	3.76115	4.75159	982.686	775.545	1	18109	0.0112021	0.00418652	145217	145217	PAX7 up vs OCT4	79.3761	265671000	3.37262	4.75159	982.686	775.545	1
ENSG00000198563	4.05136e-05	0.00237998	44.5592	44.5592	MYOG up vs OCT4	4.84703	409.636	3.64792	14.9717	270.06	67.6425	1	18158	4.05136e-05	0.00709644	25.5885	25.5885	PAX7 up vs OCT4	2.78346	235.237	3.115	14.9717	270.06	67.6425	1
ENSG00000198597	1.82111e-09	0.000144808	3.18877	3.18877	MYOG up vs OCT4	1.9539	5.20408	5.04627	68.7835	60.4819	3.29741	1	18170	1.82111e-09	1.01321e-09	21.4042	21.4042	PAX7 up vs OCT4	13.1153	34.9318	13.3315	68.7835	60.4819	3.29741	1
ENSG00000198604	1.84238e-07	0.000107984	75.9867	75.9867	MYOG up vs OCT4	12.8727	448.545	5.19888	35.2232	406.944	43.3249	1	18173	1.84238e-07	2.57183e-08	6364.36	6364.36	PAX7 up vs OCT4	1078.17	37568.5	10.5146	35.2232	406.944	43.3249	1
ENSG00000198718	3.87753e-07	1.48912e-07	20.9253	20.9253	MYOG up vs OCT4	10.3406	42.3447	9.19533	31.4956	57.3554	6.82899	1	18214	3.87753e-07	9.70556e-07	13.7361	13.7361	PAX7 up vs OCT4	6.78791	27.7965	7.92251	31.4956	57.3554	6.82899	1
ENSG00000198729	1.5787e-08	8.75846e-07	7.86761	7.86761	MYOG up vs OCT4	4.53767	13.6412	7.98897	50.5172	56.0779	4.16278	1	18222	1.5787e-08	3.42418e-08	14.2533	14.2533	PAX7 up vs OCT4	8.22064	24.713	10.2904	50.5172	56.0779	4.16278	1
ENSG00000198795	1.49934e-06	0.00473243	71.7323	71.7323	MYOG up vs OCT4	4.58958	1121.13	3.31286	25.5977	709.066	103.877	1	18257	1.49934e-06	4.79068e-07	49880.9	49880.9	PAX7 up vs OCT4	3191.49	779606	8.38685	25.5977	709.066	103.877	1
ENSG00000198815	5.2076e-06	1.61292e-05	51.0053	51.0053	MYOG up vs OCT4	13.2846	195.831	6.22951	21.0301	139.503	24.8757	1	18267	5.2076e-06	0.000106524	26.7335	26.7335	PAX7 up vs OCT4	6.96287	102.641	5.206	21.0301	139.503	24.8757	1
ENSG00000198838	4.9419e-07	0.000161455	8.2111	8.2111	MYOG up vs OCT4	3.34059	20.1827	4.99004	30.3582	89.9936	11.1165	1	18282	4.9419e-07	3.86194e-07	36.5988	36.5988	PAX7 up vs OCT4	14.8898	89.959	8.53211	30.3582	89.9936	11.1165	1
ENSG00000198887	4.75873e-05	0.000850117	992.828	992.828	MYOG up vs OCT4	28.7572	34276.8	4.1529	14.5625	669.486	172.399	1	18313	4.75873e-05	9.29833e-05	6430.66	6430.66	PAX7 up vs OCT4	186.264	222015	5.27727	14.5625	669.486	172.399	1
ENSG00000203727	2.22655e-06	1.29297e-06	15.4349	15.4349	MYOG up vs OCT4	7.26371	32.7981	7.73873	24.0643	50.1079	7.80843	1	20175	2.22655e-06	0.000435801	4.88497	4.88497	PAX7 up vs OCT4	2.29888	10.3802	4.4854	24.0643	50.1079	7.80843	1
ENSG00000203867	1.32306e-08	1.57752e-08	552.402	552.402	MYOG up vs OCT4	160.815	1897.51	10.9063	51.8219	289.233	20.9298	1	20231	1.32306e-08	1.69008e-08	534.807	534.807	PAX7 up vs OCT4	155.693	1837.07	10.8504	51.8219	289.233	20.9298	1
ENSG00000203965	0.000497479	0.000251442	3.25126	3.25126	MYOG up vs OCT4	1.91829	5.51048	4.76313	9.48503	9.67724	3.82599	1	20262	0.000497479	0.000242245	3.26657	3.26657	PAX7 up vs OCT4	1.92732	5.53642	4.78211	9.48503	9.67724	3.82599	1
ENSG00000204178	4.72389e-05	3.868e-06	90.0294	90.0294	MYOG up vs OCT4	23.1426	350.233	7.0608	14.581	98.6214	25.3638	1	20334	4.72389e-05	3.46164e-05	40.467	40.467	PAX7 up vs OCT4	10.4023	157.425	5.80613	14.581	98.6214	25.3638	1
ENSG00000204217	2.62726e-06	0.000131944	116.042	116.042	MYOG up vs OCT4	15.8787	848.035	5.09449	23.4462	339.953	54.3723	1	20345	2.62726e-06	2.20904e-06	1000.11	1000.11	PAX7 up vs OCT4	136.852	7308.85	7.40271	23.4462	339.953	54.3723	1
ENSG00000204231	7.29502e-08	9.53075e-07	37.797	37.797	MYOG up vs OCT4	14.2459	100.282	7.93425	40.4112	141.018	13.086	1	20350	7.29502e-08	2.58533e-06	28.3465	28.3465	PAX7 up vs OCT4	10.684	75.2084	7.30574	40.4112	141.018	13.086	1
ENSG00000204344	0.00737169	0.000526925	4.17572	4.17572	MYOG up vs OCT4	2.08632	8.35762	4.39042	5.28368	9.32401	6.61755	1	20391	0.00737169	0.0054426	2.87567	2.87567	PAX7 up vs OCT4	1.43677	5.7556	3.24465	5.28368	9.32401	6.61755	1
ENSG00000204348	2.01968e-06	1.6183e-05	5.73781	5.73781	MYOG up vs OCT4	3.15544	10.4336	6.22763	24.435	32.0207	4.91416	1	20394	2.01968e-06	0.000137812	4.14896	4.14896	PAX7 up vs OCT4	2.28167	7.54441	5.07192	24.435	32.0207	4.91416	1
ENSG00000204406	0.00397805	0.00498927	3.68094	3.68094	MYOG up vs OCT4	1.58115	8.56928	3.28709	6.12088	16.0189	9.81407	1	20427	0.00397805	0.00141597	4.69679	4.69679	PAX7 up vs OCT4	2.01751	10.9342	3.90182	6.12088	16.0189	9.81407	1
ENSG00000204498	3.67696e-05	0.00020424	17.1309	17.1309	MYOG up vs OCT4	4.9398	59.4085	4.86925	15.2225	86.2792	21.2545	1	20467	3.67696e-05	0.00131036	9.96055	9.96055	PAX7 up vs OCT4	2.87219	34.5425	3.93984	15.2225	86.2792	21.2545	1
ENSG00000204524	7.94623e-05	4.96353e-05	26.641	26.641	MYOG up vs OCT4	7.6563	92.7003	5.61092	13.3155	75.8793	21.3697	1	20481	7.94623e-05	0.00923739	5.73552	5.73552	PAX7 up vs OCT4	1.64832	19.9574	2.98572	13.3155	75.8793	21.3697	1
ENSG00000204576	1.8995e-08	0.00355168	3.36831	3.36831	MYOG up vs OCT4	1.59159	7.12842	3.45276	49.1835	101.311	7.72449	1	20506	1.8995e-08	3.12011e-08	38.2768	38.2768	PAX7 up vs OCT4	18.0865	81.006	10.3629	49.1835	101.311	7.72449	1
ENSG00000205056	5.82793e-06	7.50095e-06	4.53114	4.53114	MYOG up vs OCT4	2.7955	7.34438	6.66837	20.6533	17.6564	3.20586	1	20699	5.82793e-06	0.000103156	3.26555	3.26555	PAX7 up vs OCT4	2.01469	5.29302	5.22281	20.6533	17.6564	3.20586	1
ENSG00000205189	0.00116298	0.000991399	246.206	246.206	MYOG up vs OCT4	13.8401	4379.86	4.07702	8.00061	242.983	113.889	1	20731	0.00116298	0.00593804	75.5338	75.5338	PAX7 up vs OCT4	4.246	1343.7	3.20212	8.00061	242.983	113.889	1
ENSG00000205269	3.25814e-05	0.000222061	7.5547	7.5547	MYOG up vs OCT4	3.09302	18.4524	4.82648	15.5398	45.4213	10.9609	1	20749	3.25814e-05	0.000977161	5.53535	5.53535	PAX7 up vs OCT4	2.26626	13.5201	4.08415	15.5398	45.4213	10.9609	1
ENSG00000205763	3.21833e-07	6.83449e-08	62.2176	62.2176	MYOG up vs OCT4	25.2529	153.29	9.7641	32.3946	96.5342	11.1748	1	20886	3.21833e-07	7.7483e-08	59.8083	59.8083	PAX7 up vs OCT4	24.2751	147.354	9.67075	32.3946	96.5342	11.1748	1
ENSG00000205795	0.000192041	9.3942e-05	6.05069	6.05069	MYOG up vs OCT4	2.92225	12.5283	5.27188	11.3573	22.0501	7.28061	1	20897	0.000192041	0.000520566	4.48731	4.48731	PAX7 up vs OCT4	2.16719	9.29125	4.39648	11.3573	22.0501	7.28061	1
ENSG00000205903	0.00515573	0.00248822	5.16082	5.16082	MYOG up vs OCT4	1.96694	13.5409	3.62622	5.76095	19.6468	12.7888	1	20932	0.00515573	0.00100476	6.30993	6.30993	PAX7 up vs OCT4	2.4049	16.5559	4.07042	5.76095	19.6468	12.7888	1
ENSG00000206538	6.6149e-05	2.049e-05	1104980000	1104980000	MYOG up vs OCT4	760398	1605720000000	6.09536	13.7518	2672.33	728.722	1	21026	6.6149e-05	0.0073358	39578.4	39578.4	PAX7 up vs OCT4	27.236	57513800	3.09876	13.7518	2672.33	728.722	1
ENSG00000207392	0.00599741	0.0031156	6.04179	6.04179	MYOG up vs OCT4	2.03092	17.9737	3.5166	5.55646	24.2053	16.3359	1	21683	0.00599741	0.00427627	5.58323	5.58323	PAX7 up vs OCT4	1.87678	16.6096	3.36228	5.55646	24.2053	16.3359	1
ENSG00000212124	0.000767424	0.000994158	7.36699	7.36699	MYOG up vs OCT4	2.59252	20.9343	4.07565	8.70675	34.8065	14.9912	1	22570	0.000767424	0.000795599	7.77504	7.77504	PAX7 up vs OCT4	2.73612	22.0938	4.18568	8.70675	34.8065	14.9912	1
ENSG00000212127	0.00023714	0.00157582	2.59728	2.59728	MYOG up vs OCT4	1.53107	4.40596	3.84941	10.9219	11.1807	3.83884	1	22573	0.00023714	9.20693e-05	3.70539	3.70539	PAX7 up vs OCT4	2.1843	6.28573	5.28246	10.9219	11.1807	3.83884	1
ENSG00000212232	0.00231707	0.00326784	2.62407e+160	2.62407e+160	MYOG up vs OCT4	3.46786e+62	1.98558e+258	3.49335	6.91047	1286490	698120	1	22629	0.00231707	0.00109034	1.17677e+185	1.17677e+185	PAX7 up vs OCT4	1.55517e+87	8.90436e+282	4.03017	6.91047	1286490	698120	1
ENSG00000212443	0.00193052	0.000884031	8.0955e+50	8.0955e+50	MYOG up vs OCT4	4.54728e+24	1.44124e+77	4.13357	7.18972	96273.7	50214.2	1	22747	0.00193052	0.000968862	2.24582e+50	2.24582e+50	PAX7 up vs OCT4	1.26149e+24	3.99823e+76	4.08836	7.18972	96273.7	50214.2	1
ENSG00000212464	1.34237e-05	1.4426e-05	21380600	21380600	MYOG up vs OCT4	70331.5	6499660000	6.29254	18.0285	2159.68	449.221	1	22763	1.34237e-05	3.03228e-05	7043810	7043810	PAX7 up vs OCT4	23170.6	2141300000	5.87858	18.0285	2159.68	449.221	1
ENSG00000212747	0.00387749	0.00566094	23.4538	23.4538	MYOG up vs OCT4	2.91573	188.66	3.22545	6.15706	98.0931	59.7443	1	22880	0.00387749	0.00804598	19.8226	19.8226	PAX7 up vs OCT4	2.4643	159.451	3.05349	6.15706	98.0931	59.7443	1
ENSG00000213064	0.000979743	0.00806552	4.33122	4.33122	MYOG up vs OCT4	1.55618	12.0548	3.0523	8.28723	31.8253	14.4011	1	22949	0.000979743	0.00151235	6.413	6.413	PAX7 up vs OCT4	2.30415	17.8489	3.86955	8.28723	31.8253	14.4011	1
ENSG00000213073	0.000646252	0.000159361	2.11301	2.11301	MYOG up vs OCT4	1.53571	2.90732	4.99678	9.01003	3.36295	1.39967	1	22957	0.000646252	0.00017062	2.10191	2.10191	PAX7 up vs OCT4	1.52764	2.89205	4.96159	9.01003	3.36295	1.39967	1
ENSG00000213305	1.44011e-05	4.5872e-06	112067	112067	MYOG up vs OCT4	3182.67	3946050	6.95856	17.8204	828.404	174.323	1	23098	1.44011e-05	0.00786109	167.507	167.507	PAX7 up vs OCT4	4.75715	5898.17	3.06488	17.8204	828.404	174.323	1
ENSG00000213366	0.019866	0.00462326	2.52232	2.52232	MYOG up vs OCT4	1.39371	4.56486	3.32424	4.06621	5.24438	4.83655	1	23127	0.019866	0.00248918	2.74332	2.74332	PAX7 up vs OCT4	1.51583	4.96483	3.62603	4.06621	5.24438	4.83655	1
ENSG00000213462	2.51851e-05	0.000714014	23.4542	23.4542	MYOG up vs OCT4	4.80055	114.591	4.23927	16.2326	149.713	34.5861	1	23183	2.51851e-05	4.98048e-05	65.0093	65.0093	PAX7 up vs OCT4	13.306	317.618	5.60909	16.2326	149.713	34.5861	1
ENSG00000213965	6.78679e-05	0.000488321	2.62606	2.62606	MYOG up vs OCT4	1.65002	4.17946	4.42843	13.6901	10.8352	2.96799	1	23445	6.78679e-05	3.13276e-06	4.79324	4.79324	PAX7 up vs OCT4	3.01171	7.6286	7.18837	13.6901	10.8352	2.96799	1
ENSG00000214655	0.00187224	0.00201388	12.4671	12.4671	MYOG up vs OCT4	2.94792	52.7246	3.72945	7.23727	55.1555	28.5789	1	23723	0.00187224	0.00564263	8.87456	8.87456	PAX7 up vs OCT4	2.09845	37.5314	3.22704	7.23727	55.1555	28.5789	1
ENSG00000214676	0.0050759	0.00342034	4.50421	4.50421	MYOG up vs OCT4	1.78757	11.3495	3.47112	5.78228	18.1	11.7385	1	23731	0.0050759	0.000773797	6.17676	6.17676	PAX7 up vs OCT4	2.45135	15.5638	4.19943	5.78228	18.1	11.7385	1
ENSG00000214872	9.19822e-05	2.30421e-05	55.4705	55.4705	MYOG up vs OCT4	13.4149	229.37	6.03007	12.9748	95.8191	27.6937	1	23809	9.19822e-05	0.0012197	14.1154	14.1154	PAX7 up vs OCT4	3.41365	58.3671	3.97505	12.9748	95.8191	27.6937	1
ENSG00000215190	0.000235615	0.000112862	5.038	5.038	MYOG up vs OCT4	2.58858	9.80516	5.17581	10.9351	17.7717	6.09451	1	23943	0.000235615	1.96398e-05	6.76446	6.76446	PAX7 up vs OCT4	3.47565	13.1653	6.11902	10.9351	17.7717	6.09451	1
ENSG00000215271	2.72701e-06	0.0031756	2.35683	2.35683	MYOG up vs OCT4	1.39977	3.96826	3.5073	23.3089	23.1899	3.73086	1	23974	2.72701e-06	0.000428535	2.99956	2.99956	PAX7 up vs OCT4	1.7815	5.05043	4.49383	23.3089	23.1899	3.73086	1
ENSG00000215386	2.00006e-07	8.03603e-06	19.0079	19.0079	MYOG up vs OCT4	7.37336	49.0006	6.62824	34.7934	114.358	12.3254	1	24022	2.00006e-07	1.59821e-07	58.1477	58.1477	PAX7 up vs OCT4	22.5561	149.9	9.14492	34.7934	114.358	12.3254	1
ENSG00000215421	8.12223e-09	5.79969e-07	3.54755	3.54755	MYOG up vs OCT4	2.55866	4.91864	8.25943	55.5892	21.7558	1.46763	1	24034	8.12223e-09	6.2395e-09	5.99465	5.99465	PAX7 up vs OCT4	4.32362	8.31151	11.6813	55.5892	21.7558	1.46763	1
ENSG00000215447	0.00190565	0.00083458	10.6949	10.6949	MYOG up vs OCT4	3.17772	35.9946	4.16202	7.20982	38.9194	20.2429	1	24043	0.00190565	0.00475873	6.58462	6.58462	PAX7 up vs OCT4	1.95645	22.1611	3.31016	7.20982	38.9194	20.2429	1
ENSG00000215481	0.000600205	0.000373973	7.23817	7.23817	MYOG up vs OCT4	2.8709	18.249	4.56226	9.14258	28.6551	11.7534	1	24061	0.000600205	0.00896823	3.67546	3.67546	PAX7 up vs OCT4	1.45781	9.26666	3.00025	9.14258	28.6551	11.7534	1
ENSG00000215790	8.04594e-06	0.00650898	2.12241	2.12241	MYOG up vs OCT4	1.27699	3.52751	3.15726	19.6041	18.5454	3.54748	1	24123	8.04594e-06	1.5002e-05	4.45747	4.45747	PAX7 up vs OCT4	2.68194	7.40847	6.27039	19.6041	18.5454	3.54748	1
ENSG00000219481	1.63832e-06	6.71347e-05	5.50398	5.50398	MYOG up vs OCT4	2.82471	10.7246	5.44943	25.2469	41.175	6.11586	1	24689	1.63832e-06	5.48011e-06	8.53934	8.53934	PAX7 up vs OCT4	4.38249	16.639	6.85283	25.2469	41.175	6.11586	1
ENSG00000219626	0.000211972	7.11277e-05	5.26652	5.26652	MYOG up vs OCT4	2.73977	10.1236	5.41874	11.152	17.4553	5.86957	1	24711	0.000211972	0.00254064	3.03033	3.03033	PAX7 up vs OCT4	1.57645	5.82505	3.61605	11.152	17.4553	5.86957	1
ENSG00000220205	6.68225e-06	3.90619e-06	10.004	10.004	MYOG up vs OCT4	4.9888	20.0608	7.05488	20.2028	35.8468	6.65383	1	24779	6.68225e-06	0.00590235	2.84697	2.84697	PAX7 up vs OCT4	1.41973	5.70898	3.20506	20.2028	35.8468	6.65383	1
ENSG00000221923	4.80433e-06	1.29727e-06	8.01554	8.01554	MYOG up vs OCT4	4.5175	14.2222	7.73662	21.3034	25.6738	4.51931	1	25523	4.80433e-06	0.00069257	3.14106	3.14106	PAX7 up vs OCT4	1.77028	5.57328	4.25439	21.3034	25.6738	4.51931	1
ENSG00000223459	0.0039483	0.000495237	4.0762	4.0762	MYOG up vs OCT4	2.07046	8.025	4.4214	6.13147	10.3119	6.30676	1	26266	0.0039483	0.00119928	3.54645	3.54645	PAX7 up vs OCT4	1.80137	6.98206	3.98334	6.13147	10.3119	6.30676	1
ENSG00000223749	7.13983e-08	1.6704e-08	13952900000	13952900000	MYOG up vs OCT4	142424000	1366930000000	10.8598	40.5393	3123.02	288.888	1	26483	7.13983e-08	9.24406e-05	85625.3	85625.3	PAX7 up vs OCT4	874.019	8388490	5.28034	40.5393	3123.02	288.888	1
ENSG00000223764	0.000572527	0.0036779	2.65259	2.65259	MYOG up vs OCT4	1.44822	4.85852	3.43574	9.22792	12.3876	5.03403	1	26493	0.000572527	0.00228821	2.83269	2.83269	PAX7 up vs OCT4	1.54656	5.18841	3.66711	9.22792	12.3876	5.03403	1
ENSG00000224020	1.42495e-05	1.17907e-05	35.1128	35.1128	MYOG up vs OCT4	10.7485	114.705	6.40728	17.8516	91.6895	19.2607	1	26673	1.42495e-05	3.03124e-05	26.181	26.181	PAX7 up vs OCT4	8.0144	85.5268	5.87877	17.8516	91.6895	19.2607	1
ENSG00000224660	0.00025818	0.000309785	2.83333	2.83333	MYOG up vs OCT4	1.75913	4.56348	4.65727	10.7499	8.95076	3.12239	1	27136	0.00025818	1.87519e-05	3.95157	3.95157	PAX7 up vs OCT4	2.45341	6.36456	6.14489	10.7499	8.95076	3.12239	1
ENSG00000225241	3.06816e-07	0.00047882	4.03404	4.03404	MYOG up vs OCT4	2.0646	7.88213	4.43825	32.6288	53.6561	6.16666	1	27559	3.06816e-07	4.57895e-07	14.0861	14.0861	PAX7 up vs OCT4	7.2092	27.5229	8.41718	32.6288	53.6561	6.16666	1
ENSG00000225791	3.80109e-05	1.50882e-05	3.16121	3.16121	MYOG up vs OCT4	2.13724	4.67576	6.26715	15.1363	8.50027	2.10594	1	27948	3.80109e-05	0.000100535	2.61598	2.61598	PAX7 up vs OCT4	1.76862	3.86931	5.23629	15.1363	8.50027	2.10594	1
ENSG00000226254	0.00457024	0.00440613	2.06326	2.06326	MYOG up vs OCT4	1.30101	3.27211	3.34769	5.92679	4.61943	2.92281	1	28288	0.00457024	0.00116504	2.37475	2.37475	PAX7 up vs OCT4	1.49742	3.7661	3.99758	5.92679	4.61943	2.92281	1
ENSG00000226761	0.00311271	0.0108214	2.27163	2.27163	MYOG up vs OCT4	1.24492	4.14508	2.90783	6.47246	8.5807	4.97147	1	28655	0.00311271	0.000497359	3.47979	3.47979	PAX7 up vs OCT4	1.90703	6.34964	4.41926	6.47246	8.5807	4.97147	1
ENSG00000226864	0.00388964	0.00432608	2.14221	2.14221	MYOG up vs OCT4	1.32058	3.47503	3.35663	6.15263	5.27737	3.21653	1	28734	0.00388964	0.00154233	2.40144	2.40144	PAX7 up vs OCT4	1.48039	3.89554	3.85993	6.15263	5.27737	3.21653	1
ENSG00000227051	1.90864e-07	0.00628294	654.568	654.568	MYOG up vs OCT4	8.41907	50891.6	3.17454	35.0377	2433.87	260.491	1	28876	1.90864e-07	1.74489e-07	113936000	113936000	PAX7 up vs OCT4	1465450	8858340000	9.08259	35.0377	2433.87	260.491	1
ENSG00000227128	9.08597e-05	0.00075398	3.44756	3.44756	MYOG up vs OCT4	1.843	6.44907	4.21228	13.0032	18.6922	5.39068	1	28935	9.08597e-05	6.22779e-05	5.01743	5.01743	PAX7 up vs OCT4	2.68223	9.38572	5.48941	13.0032	18.6922	5.39068	1
ENSG00000227199	1.05237e-08	1.44489e-06	5.61505	5.61505	MYOG up vs OCT4	3.47589	9.07072	7.66828	53.5587	45.1522	3.1614	1	28990	1.05237e-08	3.19312e-09	15.8082	15.8082	PAX7 up vs OCT4	9.78575	25.537	12.2684	53.5587	45.1522	3.1614	1
ENSG00000227811	6.63971e-10	4.76107e-08	9.01545	9.01545	MYOG up vs OCT4	5.65175	14.3811	10.0368	79.2949	63.3754	2.99714	1	29420	6.63971e-10	1.00816e-09	18.5751	18.5751	PAX7 up vs OCT4	11.6447	29.6303	13.3363	79.2949	63.3754	2.99714	1
ENSG00000227911	0.000346717	0.000178723	4.82273	4.82273	MYOG up vs OCT4	2.44534	9.51147	4.93772	10.1678	17.1893	6.3396	1	29484	0.000346717	0.00311823	3.06604	3.06604	PAX7 up vs OCT4	1.55461	6.04689	3.51619	10.1678	17.1893	6.3396	1
ENSG00000228214	3.75787e-06	0.000786383	7.11173	7.11173	MYOG up vs OCT4	2.62256	19.2852	4.19144	22.1549	80.8104	13.6782	1	29701	3.75787e-06	3.50447e-06	28.0106	28.0106	PAX7 up vs OCT4	10.3293	75.9578	7.12036	22.1549	80.8104	13.6782	1
ENSG00000228638	0.00597356	0.00059281	3.4021	3.4021	MYOG up vs OCT4	1.8625	6.21438	4.33169	5.5618	7.39914	4.98881	1	29993	0.00597356	0.00191639	2.88931	2.88931	PAX7 up vs OCT4	1.58177	5.27771	3.7537	5.5618	7.39914	4.98881	1
ENSG00000228794	5.18749e-09	2.02796e-08	2.91642	2.91642	MYOG up vs OCT4	2.35658	3.60926	10.7036	59.2736	9.86957	0.624407	1	30103	5.18749e-09	3.35712e-06	2.04344	2.04344	PAX7 up vs OCT4	1.65118	2.52889	7.14637	59.2736	9.86957	0.624407	1
ENSG00000229206	0.000187446	0.0030821	11.4882	11.4882	MYOG up vs OCT4	2.62169	50.3406	3.52187	11.408	91.2753	30.0036	1	30382	0.000187446	0.000118055	35.5715	35.5715	PAX7 up vs OCT4	8.11771	155.873	5.15234	11.408	91.2753	30.0036	1
ENSG00000229645	4.46876e-07	1.0621e-07	9.5102	9.5102	MYOG up vs OCT4	5.71878	15.8152	9.43907	30.8257	29.2261	3.55541	1	30696	4.46876e-07	6.91585e-05	3.65678	3.65678	PAX7 up vs OCT4	2.19894	6.08115	5.43364	30.8257	29.2261	3.55541	1
ENSG00000229729	0.0106345	0.00180402	5.45026	5.45026	MYOG up vs OCT4	2.09664	14.168	3.78324	4.81622	16.1101	12.5436	1	30760	0.0106345	0.00921294	3.81445	3.81445	PAX7 up vs OCT4	1.46737	9.91572	2.98702	4.81622	16.1101	12.5436	1
ENSG00000229989	7.39764e-07	5.18356e-07	15.4885	15.4885	MYOG up vs OCT4	7.68538	31.2142	8.33415	28.546	51.38	6.74963	1	30955	7.39764e-07	2.24277e-05	7.29724	7.29724	PAX7 up vs OCT4	3.62088	14.7063	6.04507	28.546	51.38	6.74963	1
ENSG00000230397	0.00273929	0.00587987	2.60205	2.60205	MYOG up vs OCT4	1.3781	4.91305	3.20693	6.66005	9.86115	5.55241	1	31259	0.00273929	0.00100386	3.36668	3.36668	PAX7 up vs OCT4	1.78306	6.35677	4.07087	6.66005	9.86115	5.55241	1
ENSG00000230454	3.36722e-05	0.000718141	3.37965	3.37965	MYOG up vs OCT4	1.8314	6.2368	4.23641	15.4529	21.2611	5.15949	1	31305	3.36722e-05	4.0275e-05	5.18269	5.18269	PAX7 up vs OCT4	2.80844	9.56411	5.72378	15.4529	21.2611	5.15949	1
ENSG00000231806	2.09021e-05	1.57729e-05	5.88789	5.88789	MYOG up vs OCT4	3.214	10.7863	6.2421	16.7491	22.4976	5.03705	1	32278	2.09021e-05	0.00161379	2.9743	2.9743	PAX7 up vs OCT4	1.62357	5.44876	3.83775	16.7491	22.4976	5.03705	1
ENSG00000232611	0.00247828	0.000643795	2.97404	2.97404	MYOG up vs OCT4	1.73063	5.11081	4.29066	6.8092	7.31608	4.02915	1	32856	0.00247828	0.00515495	2.29549	2.29549	PAX7 up vs OCT4	1.33577	3.94473	3.27115	6.8092	7.31608	4.02915	1
ENSG00000232931	6.38497e-06	1.12325e-06	1633.19	1633.19	MYOG up vs OCT4	217.889	12241.6	7.82855	20.3517	302.65	55.7661	1	33101	6.38497e-06	0.00688785	19.2515	19.2515	PAX7 up vs OCT4	2.56841	144.3	3.12959	20.3517	302.65	55.7661	1
ENSG00000233061	0.000178071	6.45939e-05	2.91577	2.91577	MYOG up vs OCT4	1.92156	4.42436	5.46995	11.5161	7.33927	2.38989	1	33196	0.000178071	0.000402423	2.42381	2.42381	PAX7 up vs OCT4	1.59735	3.67787	4.52539	11.5161	7.33927	2.38989	1
ENSG00000233237	2.16353e-05	1.06753e-05	31.7795	31.7795	MYOG up vs OCT4	10.1588	99.4153	6.46419	16.6526	79.3871	17.8772	1	33318	2.16353e-05	0.000345663	11.7326	11.7326	PAX7 up vs OCT4	3.75049	36.7029	4.60192	16.6526	79.3871	17.8772	1
ENSG00000233895	0.000305137	0.000196913	3.06774	3.06774	MYOG up vs OCT4	1.88164	5.0015	4.88797	10.4172	9.1222	3.28381	1	33799	0.000305137	0.00018061	3.0991	3.0991	PAX7 up vs OCT4	1.90088	5.05263	4.93233	10.4172	9.1222	3.28381	1
ENSG00000234161	4.15748e-08	2.46091e-08	19.4214	19.4214	MYOG up vs OCT4	10.6658	35.3645	10.5495	43.8866	57.7776	4.93695	1	33994	4.15748e-08	0.00185153	2.88701	2.88701	PAX7 up vs OCT4	1.58548	5.25697	3.77053	43.8866	57.7776	4.93695	1
ENSG00000234456	4.68983e-05	6.16271e-05	10.7781	10.7781	MYOG up vs OCT4	4.28579	27.1051	5.49501	14.5993	45.507	11.689	1	34214	4.68983e-05	3.08754e-06	22.5109	22.5109	PAX7 up vs OCT4	8.95122	56.6112	7.19721	14.5993	45.507	11.689	1
ENSG00000235194	0.000244117	5.08095e-05	2.48617	2.48617	MYOG up vs OCT4	1.75769	3.51658	5.59835	10.863	4.78699	1.6525	1	34747	0.000244117	0.000460829	2.06501	2.06501	PAX7 up vs OCT4	1.45993	2.92087	4.45742	10.863	4.78699	1.6525	1
ENSG00000235833	0.00271656	0.00392587	5.02831	5.02831	MYOG up vs OCT4	1.829	13.824	3.40395	6.67239	25.0119	14.0571	1	35198	0.00271656	0.00116558	6.66348	6.66348	PAX7 up vs OCT4	2.42377	18.3194	3.99735	6.67239	25.0119	14.0571	1
ENSG00000236047	0.0036995	0.00796432	2.11378	2.11378	MYOG up vs OCT4	1.25466	3.56117	3.05849	6.22378	6.20635	3.7395	1	35346	0.0036995	0.00445778	2.26565	2.26565	PAX7 up vs OCT4	1.34481	3.81703	3.34201	6.22378	6.20635	3.7395	1
ENSG00000236104	0.0106012	0.00771475	10.0066	10.0066	MYOG up vs OCT4	2.02641	49.4131	3.07409	4.82013	45.055	35.0522	1	35386	0.0106012	0.00198831	16.4273	16.4273	PAX7 up vs OCT4	3.32667	81.1191	3.7357	4.82013	45.055	35.0522	1
ENSG00000236404	0.000228178	0.00851854	2.32515	2.32515	MYOG up vs OCT4	1.28318	4.21322	3.0255	11.0006	14.247	4.85669	1	35607	0.000228178	0.00156907	2.92751	2.92751	PAX7 up vs OCT4	1.61561	5.30471	3.85151	11.0006	14.247	4.85669	1
ENSG00000236537	9.25173e-09	2.57673e-09	15399600000	15399600000	MYOG up vs OCT4	278612000	851178000000	12.4614	54.5598	3219.17	221.26	1	35712	9.25173e-09	0.000511891	3991.04	3991.04	PAX7 up vs OCT4	72.2064	220596	4.40487	54.5598	3219.17	221.26	1
ENSG00000236609	0.00266778	0.00868875	4.66669	4.66669	MYOG up vs OCT4	1.57101	13.8624	3.01579	6.69926	29.1044	16.2916	1	35762	0.00266778	0.0038382	5.72212	5.72212	PAX7 up vs OCT4	1.92631	16.9976	3.41495	6.69926	29.1044	16.2916	1
ENSG00000237036	4.81233e-06	2.58884e-06	5.50388	5.50388	MYOG up vs OCT4	3.34622	9.05282	7.30491	21.2978	19.3296	3.40346	1	36070	4.81233e-06	1.10393e-05	4.50273	4.50273	PAX7 up vs OCT4	2.73754	7.40612	6.44496	21.2978	19.3296	3.40346	1
ENSG00000238057	0.000404365	0.000122775	2.79162	2.79162	MYOG up vs OCT4	1.82254	4.27595	5.13193	9.87298	6.57878	2.49878	1	36822	0.000404365	0.00139175	2.18635	2.18635	PAX7 up vs OCT4	1.42739	3.34886	3.91028	9.87298	6.57878	2.49878	1
ENSG00000238961	4.24135e-06	3.99525e-05	1864810	1864810	MYOG up vs OCT4	8656.1	401743000	5.72814	21.7319	2299.14	396.732	1	37553	4.24135e-06	7.95513e-06	18298900	18298900	PAX7 up vs OCT4	84939.8	3942180000	6.63413	21.7319	2299.14	396.732	1
ENSG00000239305	4.72427e-06	5.65009e-07	932.768	932.768	MYOG up vs OCT4	160.322	5426.94	8.27677	21.3608	242.78	42.6213	1	37802	4.72427e-06	0.00718825	13.0445	13.0445	PAX7 up vs OCT4	2.24206	75.8945	3.10871	21.3608	242.78	42.6213	1
ENSG00000239922	3.87548e-05	0.00012689	4.65304	4.65304	MYOG up vs OCT4	2.45175	8.83078	5.11478	15.0861	22.6989	5.64233	1	38068	3.87548e-05	5.63665e-05	5.29177	5.29177	PAX7 up vs OCT4	2.7883	10.043	5.54269	15.0861	22.6989	5.64233	1
ENSG00000240429	0.000418241	0.00200585	2.59422	2.59422	MYOG up vs OCT4	1.50494	4.47193	3.73141	9.8091	10.6603	4.0754	1	38287	0.000418241	0.00036019	3.22321	3.22321	PAX7 up vs OCT4	1.86982	5.55619	4.58117	9.8091	10.6603	4.0754	1
ENSG00000240891	5.00947e-05	4.3466e-06	9.78027	9.78027	MYOG up vs OCT4	4.87976	19.6022	6.99077	14.4338	25.5729	6.64401	1	38490	5.00947e-05	0.00628758	2.81625	2.81625	PAX7 up vs OCT4	1.40514	5.64448	3.17417	14.4338	25.5729	6.64401	1
ENSG00000241112	0.000196107	2.14584e-05	2.74546	2.74546	MYOG up vs OCT4	1.9257	3.9142	6.06964	11.3135	5.21568	1.7288	1	38583	0.000196107	0.00010811	2.37491	2.37491	PAX7 up vs OCT4	1.66579	3.3859	5.19828	11.3135	5.21568	1.7288	1
ENSG00000242086	9.17668e-05	0.000175819	2.68091	2.68091	MYOG up vs OCT4	1.75276	4.10056	4.94615	12.9802	8.59172	2.48216	1	39011	9.17668e-05	0.00108172	2.23516	2.23516	PAX7 up vs OCT4	1.46133	3.41876	4.03408	12.9802	8.59172	2.48216	1
ENSG00000242265	2.92682e-05	5.45607e-06	6.68447e+52	6.68447e+52	MYOG up vs OCT4	2.51773e+36	1.7747e+69	6.85543	15.8255	82954.2	19656.8	1	39097	2.92682e-05	0.00177369	1.64409e+29	1.64409e+29	PAX7 up vs OCT4	6192500000000	4.36499e+45	3.79153	15.8255	82954.2	19656.8	1
ENSG00000242600	5.69374e-05	5.77341e-05	2.61489	2.61489	MYOG up vs OCT4	1.8053	3.78755	5.52986	14.1166	7.1021	1.88664	1	39251	5.69374e-05	9.23014e-05	2.50424	2.50424	PAX7 up vs OCT4	1.72891	3.62728	5.28113	14.1166	7.1021	1.88664	1
ENSG00000243452	1.81e-05	0.00383209	2.27269	2.27269	MYOG up vs OCT4	1.36162	3.79336	3.41573	17.1568	16.5027	3.60705	1	39612	1.81e-05	6.93691e-05	3.68982	3.68982	PAX7 up vs OCT4	2.21065	6.15871	5.43203	17.1568	16.5027	3.60705	1
ENSG00000243646	0.000392254	0.00541443	4.08101	4.08101	MYOG up vs OCT4	1.62129	10.2725	3.24719	9.9308	31.0164	11.7122	1	39694	0.000392254	0.000373457	7.21525	7.21525	PAX7 up vs OCT4	2.86645	18.1618	4.56295	9.9308	31.0164	11.7122	1
ENSG00000243701	2.8458e-06	6.81905e-05	15.3903	15.3903	MYOG up vs OCT4	5.27434	44.9083	5.44113	23.1526	97.3136	15.7618	1	39722	2.8458e-06	5.22993e-06	31.719	31.719	PAX7 up vs OCT4	10.8703	92.5547	6.88052	23.1526	97.3136	15.7618	1
ENSG00000244291	4.40121e-09	1.05181e-08	5.15778	5.15778	MYOG up vs OCT4	3.7788	7.03997	11.2397	60.6805	21.5245	1.3302	1	40005	4.40121e-09	0.000117981	2.12138	2.12138	PAX7 up vs OCT4	1.55421	2.89552	5.15267	60.6805	21.5245	1.3302	1
ENSG00000245060	2.08978e-06	1.18327e-06	55.0111	55.0111	MYOG up vs OCT4	18.3891	164.566	7.79525	24.3048	106.961	16.5031	1	40224	2.08978e-06	0.00126115	7.65326	7.65326	PAX7 up vs OCT4	2.55833	22.8948	3.95863	24.3048	106.961	16.5031	1
ENSG00000245105	4.15998e-05	0.000766233	2.01049	2.01049	MYOG up vs OCT4	1.41103	2.86463	4.20429	14.9038	6.84756	1.72293	1	40227	4.15998e-05	0.000472743	2.09239	2.09239	PAX7 up vs OCT4	1.46851	2.98131	4.44464	14.9038	6.84756	1.72293	1
ENSG00000245317	0.00251829	0.000161831	3.22037	3.22037	MYOG up vs OCT4	1.95392	5.30768	4.98884	6.78521	6.20868	3.43137	1	40242	0.00251829	0.00734019	2.06752	2.06752	PAX7 up vs OCT4	1.25444	3.4076	3.09847	6.78521	6.20868	3.43137	1
ENSG00000246596	7.63542e-05	0.00996229	3.91822	3.91822	MYOG up vs OCT4	1.46002	10.5152	2.94857	13.4095	47.8961	13.3942	1	40342	7.63542e-05	6.15668e-05	12.7467	12.7467	PAX7 up vs OCT4	4.74972	34.2079	5.49554	13.4095	47.8961	13.3942	1
ENSG00000247809	8.21365e-06	2.7716e-06	4.92944	4.92944	MYOG up vs OCT4	3.08665	7.87243	7.26309	19.5385	15.6939	3.01212	1	40424	8.21365e-06	4.79991e-05	3.4429	3.4429	PAX7 up vs OCT4	2.15583	5.49839	5.62896	19.5385	15.6939	3.01212	1
ENSG00000248275	0.00467892	0.00441294	3.38722	3.38722	MYOG up vs OCT4	1.55747	7.36657	3.34694	5.89426	13.0406	8.29659	1	40553	0.00467892	0.00245372	3.75952	3.75952	PAX7 up vs OCT4	1.72866	8.17627	3.63303	5.89426	13.0406	8.29659	1
ENSG00000248932	0.00016404	4.63557e-05	5.14822	5.14822	MYOG up vs OCT4	2.77382	9.55512	5.64774	11.6905	16.3869	5.25648	1	40996	0.00016404	0.00174097	3.01237	3.01237	PAX7 up vs OCT4	1.62304	5.59097	3.80064	11.6905	16.3869	5.25648	1
ENSG00000249476	0.000168733	0.000205426	2.22437	2.22437	MYOG up vs OCT4	1.56722	3.15708	4.86629	11.6304	5.22694	1.68533	1	41350	0.000168733	0.000147981	2.28691	2.28691	PAX7 up vs OCT4	1.61128	3.24584	5.03505	11.6304	5.22694	1.68533	1
ENSG00000249592	0.00010635	0.000736854	4.36453	4.36453	MYOG up vs OCT4	2.07489	9.18075	4.22366	12.6434	25.623	7.59974	1	41419	0.00010635	0.0011878	4.02015	4.02015	PAX7 up vs OCT4	1.91118	8.45636	3.98807	12.6434	25.623	7.59974	1
ENSG00000250103	0.00278174	0.00836339	2.25343	2.25343	MYOG up vs OCT4	1.27352	3.98734	3.03452	6.63731	7.92229	4.476	1	41759	0.00278174	0.00176275	2.76197	2.76197	PAX7 up vs OCT4	1.56092	4.88718	3.79455	6.63731	7.92229	4.476	1
ENSG00000250132	1.94816e-05	0.00085469	2.31807	2.31807	MYOG up vs OCT4	1.50525	3.56981	4.15025	16.9475	11.5801	2.56237	1	41778	1.94816e-05	0.000167385	2.73763	2.73763	PAX7 up vs OCT4	1.77769	4.21592	4.97145	16.9475	11.5801	2.56237	1
ENSG00000250280	4.79031e-07	1.33075e-06	8.4579	8.4579	MYOG up vs OCT4	4.69099	15.2497	7.72043	30.5023	38.8441	4.77556	1	41873	4.79031e-07	5.31147e-07	9.97748	9.97748	PAX7 up vs OCT4	5.53379	17.9895	8.31789	30.5023	38.8441	4.77556	1
ENSG00000250461	5.76634e-05	3.42249e-05	4.28056	4.28056	MYOG up vs OCT4	2.51144	7.2959	5.81234	14.0855	14.6787	3.90793	1	42009	5.76634e-05	0.000717287	2.88631	2.88631	PAX7 up vs OCT4	1.69342	4.9195	4.237	14.0855	14.6787	3.90793	1
ENSG00000251348	5.26544e-07	2.92023e-07	6.08613	6.08613	MYOG up vs OCT4	3.91462	9.46221	8.72305	30.0669	21.4601	2.67655	1	42616	5.26544e-07	5.36936e-07	5.58807	5.58807	PAX7 up vs OCT4	3.59427	8.68787	8.31067	30.0669	21.4601	2.67655	1
ENSG00000251682	0.00362385	0.00607271	22.1096	22.1096	MYOG up vs OCT4	2.79579	174.846	3.19116	6.25324	98.0056	58.7729	1	42864	0.00362385	0.00151542	42.6574	42.6574	PAX7 up vs OCT4	5.3941	337.342	3.86855	6.25324	98.0056	58.7729	1
ENSG00000252481	0.000291663	0.00014022	4.91212e+66	4.91212e+66	MYOG up vs OCT4	4.1198e+38	5.85682e+94	5.06294	10.5064	160938	57442.6	1	43601	0.000291663	0.00199277	1.56255e+49	1.56255e+49	PAX7 up vs OCT4	1.31051e+21	1.86306e+77	3.7346	10.5064	160938	57442.6	1
ENSG00000252690	1.14795e-05	3.79633e-06	3.25414	3.25414	MYOG up vs OCT4	2.2803	4.64386	7.07206	18.4988	8.57435	1.73816	1	43788	1.14795e-05	0.000610164	2.05509	2.05509	PAX7 up vs OCT4	1.44008	2.93274	4.31733	18.4988	8.57435	1.73816	1
ENSG00000252835	0.00215607	0.000705306	500.786	500.786	MYOG up vs OCT4	22.0926	11351.6	4.24535	7.01988	250.604	133.872	1	43924	0.00215607	0.00477324	127.061	127.061	PAX7 up vs OCT4	5.6054	2880.16	3.30868	7.01988	250.604	133.872	1
ENSG00000253293	7.29253e-05	0.000756545	67.1516	67.1516	MYOG up vs OCT4	7.98325	564.85	4.21059	13.5184	224.706	62.3331	1	44339	7.29253e-05	3.95846e-05	307.416	307.416	PAX7 up vs OCT4	36.5469	2585.85	5.73316	13.5184	224.706	62.3331	1
ENSG00000253305	9.32098e-05	0.00169954	28.5511	28.5511	MYOG up vs OCT4	4.38341	185.966	3.81242	12.9443	166.589	48.2613	1	44350	9.32098e-05	1.47736e-05	249.7	249.7	PAX7 up vs OCT4	38.336	1626.41	6.27907	12.9443	166.589	48.2613	1
ENSG00000253661	0.000120852	0.00192694	7.33807	7.33807	MYOG up vs OCT4	2.36445	22.7737	3.75102	12.3566	58.0882	17.6287	1	44668	0.000120852	5.16151e-05	19.4949	19.4949	PAX7 up vs OCT4	6.28159	60.5024	5.5899	12.3566	58.0882	17.6287	1
ENSG00000253982	0.000323043	0.000221995	7.22126	7.22126	MYOG up vs OCT4	3.01611	17.2893	4.82663	10.3054	28.79	10.4763	1	44950	0.000323043	0.00149402	4.89124	4.89124	PAX7 up vs OCT4	2.04293	11.7107	3.87552	10.3054	28.79	10.4763	1
ENSG00000254202	2.84008e-06	4.65156e-06	93337.9	93337.9	MYOG up vs OCT4	2791.76	3120600	6.95025	23.1599	1045.51	169.287	1	45136	2.84008e-06	8.1654e-05	6647.52	6647.52	PAX7 up vs OCT4	198.829	222249	5.3457	23.1599	1045.51	169.287	1
ENSG00000254338	0.0112363	0.00533645	2.16246	2.16246	MYOG up vs OCT4	1.30487	3.58369	3.25427	4.74782	4.44033	3.50713	1	45256	0.0112363	0.0069602	2.09696	2.09696	PAX7 up vs OCT4	1.26534	3.47514	3.12448	4.74782	4.44033	3.50713	1
ENSG00000254535	1.03777e-05	0.00962341	4.57018	4.57018	MYOG up vs OCT4	1.53328	13.6221	2.9656	18.8074	82.2194	16.3937	1	45422	1.03777e-05	1.44985e-06	50.8086	50.8086	PAX7 up vs OCT4	17.0462	151.442	7.66611	18.8074	82.2194	16.3937	1
ENSG00000255248	7.6284e-05	8.17308e-05	116847000	116847000	MYOG up vs OCT4	70889.1	192601000000	5.3452	13.4117	2697.22	754.162	1	46078	7.6284e-05	0.000169609	31135300	31135300	PAX7 up vs OCT4	18889.2	51320800000	4.96465	13.4117	2697.22	754.162	1
ENSG00000257298	3.29186e-08	4.05008e-09	5.6206	5.6206	MYOG up vs OCT4	4.14228	7.62653	12.0573	45.4079	15.5014	1.28018	1	47225	3.29186e-08	2.5661e-07	3.53179	3.53179	PAX7 up vs OCT4	2.60286	4.79224	8.81235	45.4079	15.5014	1.28018	1
ENSG00000257315	2.96554e-06	2.23752e-06	2445.05	2445.05	MYOG up vs OCT4	258.023	23169.6	7.39478	23.0023	426.336	69.5043	1	47232	2.96554e-06	5.92885e-06	1314.18	1314.18	PAX7 up vs OCT4	138.684	12453.3	6.80632	23.0023	426.336	69.5043	1
ENSG00000257531	0.00583817	0.00217073	2.34543	2.34543	MYOG up vs OCT4	1.43395	3.83626	3.69283	5.59257	4.96234	3.32741	1	47345	0.00583817	0.00516335	2.12749	2.12749	PAX7 up vs OCT4	1.30071	3.47979	3.27036	5.59257	4.96234	3.32741	1
ENSG00000258445	0.000539961	0.00206826	3.41971	3.41971	MYOG up vs OCT4	1.68942	6.92218	3.71644	9.33451	17.0127	6.83459	1	47871	0.000539961	0.000191342	5.06329	5.06329	PAX7 up vs OCT4	2.50138	10.2491	4.90269	9.33451	17.0127	6.83459	1
ENSG00000259917	0.000184095	5.94668e-05	3.34035	3.34035	MYOG up vs OCT4	2.09566	5.32431	5.51406	11.446	9.11796	2.98729	1	49190	0.000184095	0.00217847	2.24194	2.24194	PAX7 up vs OCT4	1.40655	3.57351	3.69109	11.446	9.11796	2.98729	1
ENSG00000260023	0.00201013	0.00140833	2.45441	2.45441	MYOG up vs OCT4	1.5034	4.00699	3.90447	7.12733	6.27601	3.30208	1	49277	0.00201013	0.00518003	2.1206	2.1206	PAX7 up vs OCT4	1.29894	3.46203	3.26878	7.12733	6.27601	3.30208	1
ENSG00000260054	1.68331e-05	9.71383e-06	42.7581	42.7581	MYOG up vs OCT4	12.5227	145.995	6.51847	17.3652	95.9792	20.7266	1	49301	1.68331e-05	1.50299e-05	37.041	37.041	PAX7 up vs OCT4	10.8483	126.474	6.26934	17.3652	95.9792	20.7266	1
ENSG00000260267	0.000298629	0.000216356	5.3995	5.3995	MYOG up vs OCT4	2.56935	11.3471	4.83977	10.4598	21.1438	7.58041	1	49455	0.000298629	8.70755e-05	6.36473	6.36473	PAX7 up vs OCT4	3.02866	13.3755	5.3118	10.4598	21.1438	7.58041	1
ENSG00000260534	5.2969e-06	1.09138e-06	12.883	12.883	MYOG up vs OCT4	6.4344	25.7945	7.847	20.9728	37.0492	6.62452	1	49651	5.2969e-06	1.1316e-05	8.12237	8.12237	PAX7 up vs OCT4	4.0567	16.2627	6.43078	20.9728	37.0492	6.62452	1
ENSG00000260565	4.60157e-06	1.51867e-06	5.50703	5.50703	MYOG up vs OCT4	3.42079	8.86561	7.63683	21.4509	17.825	3.11613	1	49668	4.60157e-06	1.71616e-06	5.41327	5.41327	PAX7 up vs OCT4	3.36255	8.71467	7.55996	21.4509	17.825	3.11613	1
ENSG00000260630	0.000958257	0.000512169	2.27928	2.27928	MYOG up vs OCT4	1.52987	3.39578	4.4046	8.32477	4.84956	2.18455	1	49723	0.000958257	0.0012567	2.09754	2.09754	PAX7 up vs OCT4	1.40789	3.12503	3.96037	8.32477	4.84956	2.18455	1
ENSG00000260807	5.69996e-07	5.21323e-07	66756.7	66756.7	MYOG up vs OCT4	3891.09	1145300	8.33034	29.706	879.615	111.04	1	49852	5.69996e-07	1.73756e-05	3833.11	3833.11	PAX7 up vs OCT4	223.423	65762	6.18763	29.706	879.615	111.04	1
ENSG00000262074	9.85315e-05	0.00529052	797605000	797605000	MYOG up vs OCT4	1199.29	530459000000000	3.25848	12.8169	8444.58	2470.73	1	50718	9.85315e-05	2.29128e-05	3.03348e+16	3.03348e+16	PAX7 up vs OCT4	45611900000	2.01746e+22	6.03319	12.8169	8444.58	2470.73	1
ENSG00000262202	9.84413e-06	0.0063433	71.9863	71.9863	MYOG up vs OCT4	4.05897	1276.69	3.16986	18.9704	574.919	113.648	1	50762	9.84413e-06	3.19512e-06	16021.5	16021.5	PAX7 up vs OCT4	903.379	284144	7.17638	18.9704	574.919	113.648	1
ENSG00000263072	3.91476e-06	3.47874e-06	2.84544	2.84544	MYOG up vs OCT4	2.08107	3.89055	7.12481	22.0112	7.8952	1.34509	1	50966	3.91476e-06	3.86734e-05	2.32406	2.32406	PAX7 up vs OCT4	1.69975	3.17768	5.7458	22.0112	7.8952	1.34509	1
ENSG00000263753	6.42691e-12	6.97298e-09	47.5542	47.5542	MYOG up vs OCT4	23.3692	96.7683	11.5862	150.764	278.902	6.93725	1	51342	6.42691e-12	7.54797e-13	1565.14	1565.14	PAX7 up vs OCT4	769.145	3184.91	22.0682	150.764	278.902	6.93725	1
ENSG00000263786	0.00405974	0.00151941	4.09468	4.09468	MYOG up vs OCT4	1.88275	8.90524	3.86726	6.09223	13.4789	8.29677	1	51368	0.00405974	0.00722557	3.10265	3.10265	PAX7 up vs OCT4	1.42661	6.74774	3.10617	6.09223	13.4789	8.29677	1
ENSG00000264247	1.34827e-05	3.49992e-06	14.204	14.204	MYOG up vs OCT4	6.41918	31.4298	7.12114	18.0155	41.6516	8.66996	1	51730	1.34827e-05	0.000157206	6.45302	6.45302	PAX7 up vs OCT4	2.9163	14.2789	5.00381	18.0155	41.6516	8.66996	1
ENSG00000265185	8.00294e-06	0.00262322	58.183	58.183	MYOG up vs OCT4	5.24863	644.979	3.60045	19.6212	416.169	79.5383	1	52448	8.00294e-06	1.73698e-06	5033.6	5033.6	PAX7 up vs OCT4	454.076	55799.3	7.5524	19.6212	416.169	79.5383	1
ENSG00000267010	3.19465e-07	3.32234e-06	2.56547	2.56547	MYOG up vs OCT4	1.93749	3.39701	7.15268	32.4307	9.36896	1.08334	1	53830	3.19465e-07	1.94317e-07	3.27507	3.27507	PAX7 up vs OCT4	2.47338	4.3366	9.0066	32.4307	9.36896	1.08334	1
ENSG00000267957	0.00547921	0.00101277	3.09674	3.09674	MYOG up vs OCT4	1.71237	5.60029	4.06651	5.67819	7.30517	4.82449	1	54607	0.00547921	0.00257934	2.72669	2.72669	PAX7 up vs OCT4	1.50775	4.93107	3.60868	5.67819	7.30517	4.82449	1
ENSG00000268364	0.00102797	0.00995682	2.87617	2.87617	MYOG up vs OCT4	1.34023	6.17235	2.94884	8.20626	17.5383	8.01445	1	54790	0.00102797	0.000323849	5.26187	5.26187	PAX7 up vs OCT4	2.45191	11.2921	4.63483	8.20626	17.5383	8.01445	1
ENSG00000268575	0.000117395	0.00540399	2.4212	2.4212	MYOG up vs OCT4	1.35527	4.3255	3.24813	12.4213	15.3286	4.62774	1	54879	0.000117395	0.000181421	3.82723	3.82723	PAX7 up vs OCT4	2.1423	6.83737	4.93002	12.4213	15.3286	4.62774	1
ENSG00000268895	0.0017966	0.00387158	2.51533	2.51533	MYOG up vs OCT4	1.41336	4.47649	3.41073	7.30155	8.89206	4.56687	1	55025	0.0017966	0.000131713	3.967	3.967	PAX7 up vs OCT4	2.22905	7.06	5.0954	7.30155	8.89206	4.56687	1
ENSG00000269337	0.000970598	0.000246417	2.87483	2.87483	MYOG up vs OCT4	1.79403	4.60674	4.77341	8.30309	6.76618	3.05587	1	55210	0.000970598	0.00171832	2.32149	2.32149	PAX7 up vs OCT4	1.44872	3.72005	3.80704	8.30309	6.76618	3.05587	1
ENSG00000269690	0.00338263	0.00711446	3.33607	3.33607	MYOG up vs OCT4	1.4624	7.61034	3.11376	6.35203	15.8346	9.34817	1	55371	0.00338263	0.00160906	4.4171	4.4171	PAX7 up vs OCT4	1.93628	10.0764	3.83919	6.35203	15.8346	9.34817	1
ENSG00000269821	4.42869e-05	3.68011e-05	952.368	952.368	MYOG up vs OCT4	75.6761	11985.3	5.77278	14.7442	346.581	88.1485	1	55431	4.42869e-05	0.000568672	176.146	176.146	PAX7 up vs OCT4	13.9967	2216.75	4.35239	14.7442	346.581	88.1485	1
ENSG00000269929	4.64822e-06	0.000727821	47.4085	47.4085	MYOG up vs OCT4	6.78213	331.396	4.22977	21.4163	296.794	51.9686	1	55496	4.64822e-06	5.99635e-06	494.371	494.371	PAX7 up vs OCT4	70.7232	3455.76	6.79965	21.4163	296.794	51.9686	1
ENSG00000269938	4.07924e-05	5.9761e-05	2.82358	2.82358	MYOG up vs OCT4	1.89	4.21832	5.51143	14.9541	8.83223	2.21484	1	55504	4.07924e-05	3.12229e-06	3.87373	3.87373	PAX7 up vs OCT4	2.59293	5.78721	7.1904	14.9541	8.83223	2.21484	1
ENSG00000269951	1.28409e-07	9.53456e-08	197.972	197.972	MYOG up vs OCT4	60.5756	647.005	9.51788	37.169	191.048	19.2749	1	55516	1.28409e-07	9.0025e-07	83.8274	83.8274	PAX7 up vs OCT4	25.6496	273.962	7.97115	37.169	191.048	19.2749	1
ENSG00000269997	0.0168882	0.00969083	3.13231	3.13231	MYOG up vs OCT4	1.3774	7.12307	2.96216	4.25566	10.528	9.27703	1	55555	0.0168882	0.00185526	4.27582	4.27582	PAX7 up vs OCT4	1.88025	9.72349	3.76954	4.25566	10.528	9.27703	1
ENSG00000270041	0.0192714	0.0074599	2.5115	2.5115	MYOG up vs OCT4	1.3308	4.73974	3.09055	4.10138	6.06325	5.54379	1	55586	0.0192714	0.00294884	2.87433	2.87433	PAX7 up vs OCT4	1.52305	5.42447	3.54341	4.10138	6.06325	5.54379	1
ENSG00000270061	0.00546565	0.00311696	2.90996	2.90996	MYOG up vs OCT4	1.52301	5.55996	3.51638	5.68155	8.7291	5.76148	1	55595	0.00546565	0.000952345	3.47106	3.47106	PAX7 up vs OCT4	1.81668	6.63202	4.09684	5.68155	8.7291	5.76148	1
ENSG00000270066	5.093e-05	0.000356378	3.31219e+86	3.31219e+86	MYOG up vs OCT4	2.05371e+46	5.34183e+126	4.58653	14.3925	452140	117806	1	55597	5.093e-05	0.000306781	8.86368e+87	8.86368e+87	PAX7 up vs OCT4	5.49589e+47	1.42952e+128	4.6622	14.3925	452140	117806	1
ENSG00000270116	0.000132647	5.1061e-05	8.03125	8.03125	MYOG up vs OCT4	3.63198	17.7592	5.5957	12.1507	28.0449	8.6553	1	55639	0.000132647	0.000195474	6.17954	6.17954	PAX7 up vs OCT4	2.79458	13.6646	4.89173	12.1507	28.0449	8.6553	1
ENSG00000270640	0.00112806	0.00110395	3.8056	3.8056	MYOG up vs OCT4	1.87494	7.72431	4.02407	8.05112	14.7872	6.88749	1	55955	0.00112806	0.0016318	3.57081	3.57081	PAX7 up vs OCT4	1.75926	7.24774	3.83232	8.05112	14.7872	6.88749	1
ENSG00000271122	9.23344e-10	3.83617e-09	3.76624	3.76624	MYOG up vs OCT4	2.98197	4.75677	12.1052	75.7027	15.1266	0.749311	1	56256	9.23344e-10	3.88387e-10	4.77881	4.77881	PAX7 up vs OCT4	3.78369	6.03564	14.2789	75.7027	15.1266	0.749311	1
ENSG00000271270	3.19071e-07	0.000232396	4.25571	4.25571	MYOG up vs OCT4	2.23803	8.09243	4.80326	32.4367	49.1019	5.67665	1	56363	3.19071e-07	6.71246e-08	19.0696	19.0696	PAX7 up vs OCT4	10.0285	36.2616	9.77756	32.4367	49.1019	5.67665	1
ENSG00000271614	6.26027e-09	1.37921e-09	42.1658	42.1658	MYOG up vs OCT4	22.873	77.7315	13.0385	57.7021	79.1206	5.14197	1	56578	6.26027e-09	0.00344256	2.70523	2.70523	PAX7 up vs OCT4	1.46746	4.98702	3.46797	57.7021	79.1206	5.14197	1
ENSG00000271860	4.96548e-07	3.67204e-07	21245.2	21245.2	MYOG up vs OCT4	1780.6	253488	8.56634	30.3363	683.389	84.4768	1	56737	4.96548e-07	0.000179124	311.67	311.67	PAX7 up vs OCT4	26.1216	3718.69	4.93657	30.3363	683.389	84.4768	1
ENSG00000271895	2.58278e-05	5.057e-05	15.2446	15.2446	MYOG up vs OCT4	5.40598	42.9889	5.60089	16.1638	63.6726	14.7721	1	56756	2.58278e-05	0.000742547	7.78731	7.78731	PAX7 up vs OCT4	2.76151	21.9598	4.21985	16.1638	63.6726	14.7721	1
ENSG00000271907	0.00128073	0.00125975	28.3205	28.3205	MYOG up vs OCT4	4.68115	171.336	3.95918	7.84218	93.1303	44.5334	1	56764	0.00128073	0.000994923	31.2379	31.2379	PAX7 up vs OCT4	5.16337	188.986	4.07527	7.84218	93.1303	44.5334	1
ENSG00000271912	0.00124787	0.000169052	3.28314	3.28314	MYOG up vs OCT4	1.9711	5.46851	4.96635	7.88468	7.52257	3.57778	1	56766	0.00124787	0.0062752	2.13835	2.13835	PAX7 up vs OCT4	1.28381	3.56172	3.17514	7.88468	7.52257	3.57778	1
ENSG00000272106	2.62607e-05	0.000562149	4.74588	4.74588	MYOG up vs OCT4	2.21589	10.1645	4.35814	16.1185	34.2682	7.97257	1	56897	2.62607e-05	8.06253e-06	10.6734	10.6734	PAX7 up vs OCT4	4.98351	22.8597	6.62633	16.1185	34.2682	7.97257	1
ENSG00000272325	2.33234e-07	0.00542871	12.1264	12.1264	MYOG up vs OCT4	2.35553	62.4269	3.2459	34.0017	334.613	36.904	1	57040	2.33234e-07	1.45761e-06	361.75	361.75	PAX7 up vs OCT4	70.2696	1862.3	7.66274	34.0017	334.613	36.904	1
ENSG00000272452	0.00032548	0.000437973	21.4087	21.4087	MYOG up vs OCT4	4.98822	91.8829	4.48291	10.2907	80.0358	29.1656	1	57125	0.00032548	6.75307e-05	41.356	41.356	PAX7 up vs OCT4	9.63594	177.494	5.4463	10.2907	80.0358	29.1656	1
ENSG00000272768	0.00037679	8.3595e-05	4.49548	4.49548	MYOG up vs OCT4	2.46544	8.19705	5.3333	10.0076	13.2354	4.9595	1	57319	0.00037679	0.00292506	2.71758	2.71758	PAX7 up vs OCT4	1.4904	4.95524	3.54736	10.0076	13.2354	4.9595	1
ENSG00000272994	2.30456e-05	0.00184449	7.34863	7.34863	MYOG up vs OCT4	2.38116	22.679	3.77239	16.477	76.6935	17.4547	1	57467	2.30456e-05	2.8408e-05	22.8061	22.8061	PAX7 up vs OCT4	7.38982	70.3833	5.91441	16.477	76.6935	17.4547	1
ENSG00000273131	0.0108129	0.00206269	8.51555	8.51555	MYOG up vs OCT4	2.49406	29.0749	3.71776	4.7955	26.5037	20.7255	1	57552	0.0108129	0.0042872	6.93358	6.93358	PAX7 up vs OCT4	2.03073	23.6735	3.36103	4.7955	26.5037	20.7255	1

## Sheet: GO Term BP PAX7 Up & MYOG Up
Category	Term	Count	%	PValue	Genes	List Total	Pop Hits	Pop Total	Fold Enrichment	Bonferroni	Benjamini	FDR
GOTERM_BP_ALL	GO:0019219~regulation of nucleobase-containing compound metabolic process	261	30.4551	3.65694e-15	ENSG00000131759, ENSG00000169946, ENSG00000113448, ENSG00000197461, ENSG00000113240, ENSG00000087074, ENSG00000171223, ENSG00000114166, ENSG00000126778, ENSG00000166439, ENSG00000181085, ENSG00000204524, ENSG00000078699, ENSG00000118495, ENSG00000141644, ENSG00000136870, ENSG00000116539, ENSG00000175395, ENSG00000214872, ENSG00000144026, ENSG00000168283, ENSG00000145675, ENSG00000178229, ENSG0000…	694	4104	16792	1.53878	2.18359e-11	2.18359e-11	7.10543e-12
GOTERM_BP_ALL	GO:0006355~regulation of transcription, DNA-templated	237	27.6546	3.69398e-15	ENSG00000131759, ENSG00000169946, ENSG00000087074, ENSG00000171223, ENSG00000114166, ENSG00000126778, ENSG00000204524, ENSG00000078699, ENSG00000118495, ENSG00000141644, ENSG00000136870, ENSG00000116539, ENSG00000175395, ENSG00000214872, ENSG00000144026, ENSG00000168283, ENSG00000145675, ENSG00000178229, ENSG00000183691, ENSG00000164938, ENSG00000012174, ENSG00000128709, ENSG00000106261, ENSG0000…	694	3603	16792	1.59157	2.18359e-11	1.09179e-11	7.10543e-12
GOTERM_BP_ALL	GO:2000112~regulation of cellular macromolecule biosynthetic process	255	29.755	5.58225e-15	ENSG00000131759, ENSG00000126070, ENSG00000169946, ENSG00000197461, ENSG00000087074, ENSG00000171223, ENSG00000114166, ENSG00000126778, ENSG00000181085, ENSG00000204524, ENSG00000078699, ENSG00000118495, ENSG00000134030, ENSG00000141644, ENSG00000136870, ENSG00000116539, ENSG00000175395, ENSG00000214872, ENSG00000144026, ENSG00000168283, ENSG00000145675, ENSG00000178229, ENSG00000183691, ENSG0000…	694	3991	16792	1.54597	3.30846e-11	1.10282e-11	1.07581e-11
GOTERM_BP_ALL	GO:0051252~regulation of RNA metabolic process	244	28.4714	5.70351e-15	ENSG00000131759, ENSG00000169946, ENSG00000113240, ENSG00000087074, ENSG00000171223, ENSG00000114166, ENSG00000126778, ENSG00000204524, ENSG00000078699, ENSG00000118495, ENSG00000141644, ENSG00000136870, ENSG00000116539, ENSG00000175395, ENSG00000214872, ENSG00000144026, ENSG00000168283, ENSG00000145675, ENSG00000178229, ENSG00000183691, ENSG00000164938, ENSG00000012174, ENSG00000128709, ENSG0000…	694	3762	16792	1.56933	3.37463e-11	8.43658e-12	1.09801e-11
GOTERM_BP_ALL	GO:1903506~regulation of nucleic acid-templated transcription	237	27.6546	7.55683e-15	ENSG00000131759, ENSG00000169946, ENSG00000087074, ENSG00000171223, ENSG00000114166, ENSG00000126778, ENSG00000204524, ENSG00000078699, ENSG00000118495, ENSG00000141644, ENSG00000136870, ENSG00000116539, ENSG00000175395, ENSG00000214872, ENSG00000144026, ENSG00000168283, ENSG00000145675, ENSG00000178229, ENSG00000183691, ENSG00000164938, ENSG00000012174, ENSG00000128709, ENSG00000106261, ENSG0000…	694	3625	16792	1.58192	4.49951e-11	8.99902e-12	1.46327e-11
GOTERM_BP_ALL	GO:2001141~regulation of RNA biosynthetic process	237	27.6546	1.3931e-14	ENSG00000131759, ENSG00000169946, ENSG00000087074, ENSG00000171223, ENSG00000114166, ENSG00000126778, ENSG00000204524, ENSG00000078699, ENSG00000118495, ENSG00000141644, ENSG00000136870, ENSG00000116539, ENSG00000175395, ENSG00000214872, ENSG00000144026, ENSG00000168283, ENSG00000145675, ENSG00000178229, ENSG00000183691, ENSG00000164938, ENSG00000012174, ENSG00000128709, ENSG00000106261, ENSG0000…	694	3644	16792	1.57367	8.27116e-11	1.37853e-11	2.69007e-11
GOTERM_BP_ALL	GO:0010468~regulation of gene expression	270	31.5053	1.62905e-14	ENSG00000131759, ENSG00000126070, ENSG00000169946, ENSG00000113240, ENSG00000087074, ENSG00000171223, ENSG00000114166, ENSG00000126778, ENSG00000204524, ENSG00000078699, ENSG00000118495, ENSG00000134030, ENSG00000141644, ENSG00000136870, ENSG00000116539, ENSG00000175395, ENSG00000214872, ENSG00000144026, ENSG00000168283, ENSG00000145675, ENSG00000178229, ENSG00000183691, ENSG00000164938, ENSG0000…	694	4345	16792	1.50355	9.72689e-11	1.38956e-11	3.16303e-11
GOTERM_BP_ALL	GO:0006357~regulation of transcription from RNA polymerase II promoter	143	16.6861	4.37321e-14	ENSG00000138449, ENSG00000131759, ENSG00000257315, ENSG00000169946, ENSG00000105976, ENSG00000080503, ENSG00000087074, ENSG00000121297, ENSG00000114166, ENSG00000176909, ENSG00000171223, ENSG00000126778, ENSG00000112837, ENSG00000173039, ENSG00000124782, ENSG00000078699, ENSG00000204217, ENSG00000141644, ENSG00000118689, ENSG00000118495, ENSG00000136870, ENSG00000116539, ENSG00000150347, ENSG0000…	694	1835	16792	1.88557	2.60707e-10	3.25884e-11	8.47877e-11
GOTERM_BP_ALL	GO:0051171~regulation of nitrogen compound metabolic process	270	31.5053	9.09889e-14	ENSG00000131759, ENSG00000126070, ENSG00000169946, ENSG00000113448, ENSG00000197461, ENSG00000113240, ENSG00000087074, ENSG00000171223, ENSG00000114166, ENSG00000126778, ENSG00000166439, ENSG00000181085, ENSG00000204524, ENSG00000078699, ENSG00000118495, ENSG00000134030, ENSG00000141644, ENSG00000136870, ENSG00000116539, ENSG00000175395, ENSG00000214872, ENSG00000144026, ENSG00000168283, ENSG0000…	694	4404	16792	1.4834	5.42588e-10	6.02876e-11	1.76459e-10
GOTERM_BP_ALL	GO:0010556~regulation of macromolecule biosynthetic process	256	29.8716	9.8531e-14	ENSG00000131759, ENSG00000126070, ENSG00000169946, ENSG00000197461, ENSG00000087074, ENSG00000171223, ENSG00000114166, ENSG00000126778, ENSG00000181085, ENSG00000204524, ENSG00000078699, ENSG00000118495, ENSG00000134030, ENSG00000141644, ENSG00000136870, ENSG00000116539, ENSG00000175395, ENSG00000214872, ENSG00000144026, ENSG00000168283, ENSG00000145675, ENSG00000178229, ENSG00000183691, ENSG0000…	694	4107	16792	1.5082	5.86922e-10	5.86922e-11	1.9087e-10
GOTERM_BP_ALL	GO:0097659~nucleic acid-templated transcription	238	27.7713	3.61826e-13	ENSG00000131759, ENSG00000169946, ENSG00000087074, ENSG00000171223, ENSG00000114166, ENSG00000126778, ENSG00000204524, ENSG00000078699, ENSG00000118495, ENSG00000141644, ENSG00000136870, ENSG00000116539, ENSG00000175395, ENSG00000214872, ENSG00000144026, ENSG00000168283, ENSG00000145675, ENSG00000178229, ENSG00000183691, ENSG00000164938, ENSG00000012174, ENSG00000128709, ENSG00000106261, ENSG0000…	694	3771	16792	1.52709	2.15646e-09	1.96042e-10	7.01295e-10
GOTERM_BP_ALL	GO:0006351~transcription, DNA-templated	230	26.8378	3.80207e-13	ENSG00000131759, ENSG00000169946, ENSG00000087074, ENSG00000171223, ENSG00000114166, ENSG00000126778, ENSG00000204524, ENSG00000078699, ENSG00000141644, ENSG00000118495, ENSG00000136870, ENSG00000116539, ENSG00000175395, ENSG00000214872, ENSG00000144026, ENSG00000168283, ENSG00000145675, ENSG00000178229, ENSG00000183691, ENSG00000164938, ENSG00000012174, ENSG00000128709, ENSG00000106261, ENSG0000…	694	3605	16792	1.54371	2.2663e-09	1.88858e-10	7.37022e-10
GOTERM_BP_ALL	GO:0031326~regulation of cellular biosynthetic process	259	30.2217	2.36519e-12	ENSG00000131759, ENSG00000126070, ENSG00000169946, ENSG00000197461, ENSG00000087074, ENSG00000171223, ENSG00000114166, ENSG00000126778, ENSG00000181085, ENSG00000204524, ENSG00000078699, ENSG00000118495, ENSG00000134030, ENSG00000141644, ENSG00000136870, ENSG00000116539, ENSG00000175395, ENSG00000214872, ENSG00000144026, ENSG00000168283, ENSG00000145675, ENSG00000178229, ENSG00000183691, ENSG0000…	694	4284	16792	1.46283	1.40967e-08	1.08436e-09	4.58437e-09
GOTERM_BP_ALL	GO:0009889~regulation of biosynthetic process	260	30.3384	5.86347e-12	ENSG00000131759, ENSG00000126070, ENSG00000169946, ENSG00000197461, ENSG00000087074, ENSG00000171223, ENSG00000114166, ENSG00000126778, ENSG00000181085, ENSG00000204524, ENSG00000078699, ENSG00000118495, ENSG00000134030, ENSG00000141644, ENSG00000136870, ENSG00000116539, ENSG00000175395, ENSG00000214872, ENSG00000144026, ENSG00000168283, ENSG00000145675, ENSG00000178229, ENSG00000183691, ENSG0000…	694	4339	16792	1.44986	3.4946e-08	2.49614e-09	1.13647e-08
GOTERM_BP_ALL	GO:0032774~RNA biosynthetic process	239	27.888	9.1971e-12	ENSG00000131759, ENSG00000169946, ENSG00000087074, ENSG00000171223, ENSG00000114166, ENSG00000126778, ENSG00000204524, ENSG00000078699, ENSG00000118495, ENSG00000141644, ENSG00000136870, ENSG00000116539, ENSG00000175395, ENSG00000214872, ENSG00000144026, ENSG00000168283, ENSG00000145675, ENSG00000178229, ENSG00000183691, ENSG00000164938, ENSG00000012174, ENSG00000128709, ENSG00000106261, ENSG0000…	694	3905	16792	1.48088	5.48146e-08	3.65431e-09	1.78262e-08
GOTERM_BP_ALL	GO:0010557~positive regulation of macromolecule biosynthetic process	123	14.3524	9.98005e-12	ENSG00000138449, ENSG00000131759, ENSG00000179833, ENSG00000169946, ENSG00000105976, ENSG00000197461, ENSG00000080503, ENSG00000087074, ENSG00000160310, ENSG00000114166, ENSG00000176909, ENSG00000171223, ENSG00000126778, ENSG00000173039, ENSG00000181085, ENSG00000124782, ENSG00000078699, ENSG00000204217, ENSG00000118689, ENSG00000118495, ENSG00000116539, ENSG00000145675, ENSG00000183691, ENSG0000…	694	1597	16792	1.86356	5.94809e-08	3.71756e-09	1.93437e-08
GOTERM_BP_ALL	GO:0061061~muscle structure development	63	7.35123	1.09192e-11	ENSG00000131759, ENSG00000023902, ENSG00000169946, ENSG00000105204, ENSG00000198563, ENSG00000196569, ENSG00000176909, ENSG00000145824, ENSG00000126778, ENSG00000219626, ENSG00000179388, ENSG00000127418, ENSG00000118495, ENSG00000214872, ENSG00000150347, ENSG00000163513, ENSG00000183691, ENSG00000170802, ENSG00000122877, ENSG00000145349, ENSG00000114315, ENSG00000120616, ENSG00000108823, ENSG0000…	694	589	16792	2.58802	6.50782e-08	3.82813e-09	2.11639e-08
GOTERM_BP_ALL	GO:1903508~positive regulation of nucleic acid-templated transcription	109	12.7188	1.18236e-11	ENSG00000131759, ENSG00000138449, ENSG00000179833, ENSG00000169946, ENSG00000105976, ENSG00000080503, ENSG00000087074, ENSG00000160310, ENSG00000114166, ENSG00000171223, ENSG00000176909, ENSG00000126778, ENSG00000173039, ENSG00000124782, ENSG00000078699, ENSG00000204217, ENSG00000118689, ENSG00000118495, ENSG00000116539, ENSG00000145675, ENSG00000183691, ENSG00000073614, ENSG00000170802, ENSG0000…	694	1349	16792	1.95505	7.04683e-08	3.91491e-09	2.29169e-08
GOTERM_BP_ALL	GO:0045893~positive regulation of transcription, DNA-templated	109	12.7188	1.18236e-11	ENSG00000131759, ENSG00000138449, ENSG00000179833, ENSG00000169946, ENSG00000105976, ENSG00000080503, ENSG00000087074, ENSG00000160310, ENSG00000114166, ENSG00000171223, ENSG00000176909, ENSG00000126778, ENSG00000173039, ENSG00000124782, ENSG00000078699, ENSG00000204217, ENSG00000118689, ENSG00000118495, ENSG00000116539, ENSG00000145675, ENSG00000183691, ENSG00000073614, ENSG00000170802, ENSG0000…	694	1349	16792	1.95505	7.04683e-08	3.91491e-09	2.29169e-08
GOTERM_BP_ALL	GO:0051254~positive regulation of RNA metabolic process	112	13.0688	2.05968e-11	ENSG00000131759, ENSG00000138449, ENSG00000179833, ENSG00000169946, ENSG00000105976, ENSG00000080503, ENSG00000087074, ENSG00000160310, ENSG00000114166, ENSG00000176909, ENSG00000171223, ENSG00000126778, ENSG00000173039, ENSG00000124782, ENSG00000078699, ENSG00000204217, ENSG00000118689, ENSG00000118495, ENSG00000116539, ENSG00000145675, ENSG00000183691, ENSG00000170802, ENSG00000073614, ENSG0000…	694	1415	16792	1.91516	1.22757e-07	6.46087e-09	3.99214e-08
GOTERM_BP_ALL	GO:1902680~positive regulation of RNA biosynthetic process	109	12.7188	2.91519e-11	ENSG00000131759, ENSG00000138449, ENSG00000179833, ENSG00000169946, ENSG00000105976, ENSG00000080503, ENSG00000087074, ENSG00000160310, ENSG00000114166, ENSG00000171223, ENSG00000176909, ENSG00000126778, ENSG00000173039, ENSG00000124782, ENSG00000078699, ENSG00000204217, ENSG00000118689, ENSG00000118495, ENSG00000116539, ENSG00000145675, ENSG00000183691, ENSG00000073614, ENSG00000170802, ENSG0000…	694	1369	16792	1.92649	1.73745e-07	8.68727e-09	5.65034e-08
GOTERM_BP_ALL	GO:0045935~positive regulation of nucleobase-containing compound metabolic process	124	14.4691	5.67658e-11	ENSG00000138449, ENSG00000131759, ENSG00000179833, ENSG00000169946, ENSG00000105976, ENSG00000080503, ENSG00000197461, ENSG00000087074, ENSG00000160310, ENSG00000114166, ENSG00000176909, ENSG00000171223, ENSG00000126778, ENSG00000173039, ENSG00000181085, ENSG00000124782, ENSG00000064655, ENSG00000078699, ENSG00000204217, ENSG00000118689, ENSG00000118495, ENSG00000116539, ENSG00000145675, ENSG0000…	694	1658	16792	1.80959	3.38324e-07	1.61107e-08	1.10026e-07
GOTERM_BP_ALL	GO:0050794~regulation of cellular process	512	59.7433	9.40342e-11	ENSG00000131759, ENSG00000126070, ENSG00000169946, ENSG00000078142, ENSG00000113448, ENSG00000113240, ENSG00000103227, ENSG00000144227, ENSG00000067208, ENSG00000087074, ENSG00000171223, ENSG00000166439, ENSG00000126778, ENSG00000183688, ENSG00000113441, ENSG00000182923, ENSG00000121957, ENSG00000181085, ENSG00000204524, ENSG00000136878, ENSG00000141644, ENSG00000118495, ENSG00000136870, ENSG0000…	694	10489	16792	1.18108	5.60444e-07	2.54747e-08	1.82261e-07
GOTERM_BP_ALL	GO:0009653~anatomical structure morphogenesis	173	20.1867	1.29512e-10	ENSG00000138449, ENSG00000131759, ENSG00000154310, ENSG00000169946, ENSG00000105976, ENSG00000197461, ENSG00000067208, ENSG00000171223, ENSG00000126778, ENSG00000183688, ENSG00000112837, ENSG00000172037, ENSG00000173039, ENSG00000179542, ENSG00000158079, ENSG00000124782, ENSG00000064655, ENSG00000204217, ENSG00000118689, ENSG00000150347, ENSG00000214872, ENSG00000176438, ENSG00000163513, ENSG0000…	694	2631	16792	1.59099	7.71894e-07	3.35606e-08	2.51026e-07
GOTERM_BP_ALL	GO:0006366~transcription from RNA polymerase II promoter	131	15.2859	1.79327e-10	ENSG00000138449, ENSG00000131759, ENSG00000169946, ENSG00000105976, ENSG00000080503, ENSG00000087074, ENSG00000121297, ENSG00000114166, ENSG00000176909, ENSG00000171223, ENSG00000126778, ENSG00000112837, ENSG00000173039, ENSG00000124782, ENSG00000078699, ENSG00000204217, ENSG00000141644, ENSG00000118689, ENSG00000118495, ENSG00000136870, ENSG00000116539, ENSG00000150347, ENSG00000168283, ENSG0000…	694	1820	16792	1.74158	1.06879e-06	4.45328e-08	3.47578e-07
GOTERM_BP_ALL	GO:0051173~positive regulation of nitrogen compound metabolic process	128	14.9358	2.06235e-10	ENSG00000138449, ENSG00000131759, ENSG00000179833, ENSG00000169946, ENSG00000105976, ENSG00000080503, ENSG00000197461, ENSG00000087074, ENSG00000160310, ENSG00000114166, ENSG00000176909, ENSG00000171223, ENSG00000126778, ENSG00000173039, ENSG00000181085, ENSG00000124782, ENSG00000064655, ENSG00000078699, ENSG00000204217, ENSG00000118689, ENSG00000118495, ENSG00000116539, ENSG00000145675, ENSG0000…	694	1767	16792	1.75274	1.22916e-06	4.91664e-08	3.99732e-07
GOTERM_BP_ALL	GO:0044767~single-organism developmental process	304	35.4726	2.86698e-10	ENSG00000131759, ENSG00000107821, ENSG00000169946, ENSG00000154310, ENSG00000113448, ENSG00000197461, ENSG00000067208, ENSG00000107130, ENSG00000171223, ENSG00000183688, ENSG00000126778, ENSG00000121957, ENSG00000078699, ENSG00000118495, ENSG00000141644, ENSG00000214872, ENSG00000121210, ENSG00000168283, ENSG00000145675, ENSG00000183691, ENSG00000185008, ENSG00000183386, ENSG00000128709, ENSG0000…	694	5475	16792	1.34348	1.70872e-06	6.572e-08	5.5569e-07
GOTERM_BP_ALL	GO:0010628~positive regulation of gene expression	123	14.3524	4.19629e-10	ENSG00000138449, ENSG00000131759, ENSG00000179833, ENSG00000126070, ENSG00000169946, ENSG00000105976, ENSG00000080503, ENSG00000087074, ENSG00000160310, ENSG00000114166, ENSG00000176909, ENSG00000171223, ENSG00000126778, ENSG00000173039, ENSG00000124782, ENSG00000078699, ENSG00000204217, ENSG00000118689, ENSG00000118495, ENSG00000116539, ENSG00000145675, ENSG00000183691, ENSG00000170802, ENSG0000…	694	1692	16792	1.75893	2.50099e-06	9.26292e-08	8.13342e-07
GOTERM_BP_ALL	GO:0045944~positive regulation of transcription from RNA polymerase II promoter	87	10.1517	4.27373e-10	ENSG00000138449, ENSG00000131759, ENSG00000169946, ENSG00000105976, ENSG00000138696, ENSG00000168769, ENSG00000080503, ENSG00000114166, ENSG00000171223, ENSG00000176909, ENSG00000126778, ENSG00000173039, ENSG00000078699, ENSG00000204217, ENSG00000147862, ENSG00000118689, ENSG00000118495, ENSG00000116539, ENSG00000171016, ENSG00000005102, ENSG00000182636, ENSG00000163848, ENSG00000119778, ENSG0000…	694	1041	16792	2.02214	2.54714e-06	9.09694e-08	8.28351e-07
GOTERM_BP_ALL	GO:0048856~anatomical structure development	303	35.3559	4.46189e-10	ENSG00000131759, ENSG00000107821, ENSG00000169946, ENSG00000154310, ENSG00000113448, ENSG00000197461, ENSG00000067208, ENSG00000107130, ENSG00000171223, ENSG00000183688, ENSG00000126778, ENSG00000121957, ENSG00000078699, ENSG00000118495, ENSG00000141644, ENSG00000214872, ENSG00000121210, ENSG00000168283, ENSG00000145675, ENSG00000183691, ENSG00000185008, ENSG00000183386, ENSG00000128709, ENSG0000…	694	5473	16792	1.33955	2.65928e-06	9.16995e-08	8.64822e-07
GOTERM_BP_ALL	GO:0045892~negative regulation of transcription, DNA-templated	92	10.7351	4.66103e-10	ENSG00000131759, ENSG00000170242, ENSG00000257315, ENSG00000169946, ENSG00000080503, ENSG00000087074, ENSG00000100034, ENSG00000121297, ENSG00000160310, ENSG00000183955, ENSG00000132275, ENSG00000171223, ENSG00000126778, ENSG00000112837, ENSG00000173039, ENSG00000124782, ENSG00000015153, ENSG00000078699, ENSG00000010803, ENSG00000147862, ENSG00000141644, ENSG00000118689, ENSG00000136870, ENSG0000…	694	1130	16792	1.96994	2.77797e-06	9.2599e-08	9.03419e-07
GOTERM_BP_ALL	GO:0034654~nucleobase-containing compound biosynthetic process	252	29.4049	7.06566e-10	ENSG00000131759, ENSG00000169946, ENSG00000087074, ENSG00000171223, ENSG00000114166, ENSG00000126778, ENSG00000181085, ENSG00000204524, ENSG00000078699, ENSG00000118495, ENSG00000141644, ENSG00000136870, ENSG00000116539, ENSG00000175395, ENSG00000214872, ENSG00000144026, ENSG00000168283, ENSG00000145675, ENSG00000178229, ENSG00000183691, ENSG00000164938, ENSG00000012174, ENSG00000128709, ENSG0000…	694	4357	16792	1.39945	4.21113e-06	1.35843e-07	1.36949e-06
GOTERM_BP_ALL	GO:0035295~tube development	58	6.76779	1.05878e-09	ENSG00000056586, ENSG00000131759, ENSG00000169946, ENSG00000105976, ENSG00000197461, ENSG00000126778, ENSG00000121957, ENSG00000078246, ENSG00000078699, ENSG00000204217, ENSG00000133121, ENSG00000147862, ENSG00000163513, ENSG00000183691, ENSG00000125812, ENSG00000145147, ENSG00000185008, ENSG00000143878, ENSG00000114315, ENSG00000163909, ENSG00000070193, ENSG00000165617, ENSG00000166949, ENSG0000…	694	580	16792	2.4196	6.31032e-06	1.97198e-07	2.05217e-06
GOTERM_BP_ALL	GO:0032502~developmental process	308	35.9393	1.20629e-09	ENSG00000131759, ENSG00000107821, ENSG00000169946, ENSG00000154310, ENSG00000113448, ENSG00000197461, ENSG00000067208, ENSG00000107130, ENSG00000171223, ENSG00000183688, ENSG00000126778, ENSG00000121957, ENSG00000078699, ENSG00000118495, ENSG00000141644, ENSG00000214872, ENSG00000121210, ENSG00000168283, ENSG00000145675, ENSG00000183691, ENSG00000185008, ENSG00000183386, ENSG00000128709, ENSG0000…	694	5632	16792	1.32322	7.18946e-06	2.17863e-07	2.33808e-06
GOTERM_BP_ALL	GO:0019438~aromatic compound biosynthetic process	254	29.6383	1.22385e-09	ENSG00000131759, ENSG00000169946, ENSG00000087074, ENSG00000171223, ENSG00000114166, ENSG00000126778, ENSG00000181085, ENSG00000204524, ENSG00000078699, ENSG00000118495, ENSG00000141644, ENSG00000136870, ENSG00000116539, ENSG00000175395, ENSG00000214872, ENSG00000144026, ENSG00000168283, ENSG00000145675, ENSG00000178229, ENSG00000183691, ENSG00000164938, ENSG00000012174, ENSG00000128709, ENSG0000…	694	4424	16792	1.38919	7.29412e-06	2.14534e-07	2.37212e-06
GOTERM_BP_ALL	GO:0060541~respiratory system development	31	3.61727	1.23239e-09	ENSG00000056586, ENSG00000131759, ENSG00000169946, ENSG00000197461, ENSG00000117707, ENSG00000126778, ENSG00000114861, ENSG00000138802, ENSG00000121957, ENSG00000078246, ENSG00000204217, ENSG00000147862, ENSG00000127418, ENSG00000102678, ENSG00000041982, ENSG00000163513, ENSG00000198162, ENSG00000183691, ENSG00000114315, ENSG00000164093, ENSG00000113971, ENSG00000127528, ENSG00000165240, ENSG0000…	694	203	16792	3.69495	7.34503e-06	2.09859e-07	2.38867e-06
GOTERM_BP_ALL	GO:0034645~cellular macromolecule biosynthetic process	280	32.6721	1.57178e-09	ENSG00000131759, ENSG00000126070, ENSG00000169946, ENSG00000078142, ENSG00000197461, ENSG00000103227, ENSG00000087074, ENSG00000171223, ENSG00000114166, ENSG00000126778, ENSG00000181085, ENSG00000204524, ENSG00000078699, ENSG00000196998, ENSG00000118495, ENSG00000134030, ENSG00000141644, ENSG00000136870, ENSG00000116539, ENSG00000175395, ENSG00000214872, ENSG00000144026, ENSG00000168283, ENSG0000…	694	5012	16792	1.35173	9.36777e-06	2.60217e-07	3.04649e-06
GOTERM_BP_ALL	GO:1902679~negative regulation of RNA biosynthetic process	94	10.9685	1.64715e-09	ENSG00000131759, ENSG00000170242, ENSG00000257315, ENSG00000169946, ENSG00000080503, ENSG00000087074, ENSG00000100034, ENSG00000121297, ENSG00000160310, ENSG00000183955, ENSG00000132275, ENSG00000171223, ENSG00000126778, ENSG00000112837, ENSG00000173039, ENSG00000124782, ENSG00000015153, ENSG00000078699, ENSG00000010803, ENSG00000147862, ENSG00000141644, ENSG00000118689, ENSG00000136870, ENSG0000…	694	1194	16792	1.90487	9.81695e-06	2.65324e-07	3.19257e-06
GOTERM_BP_ALL	GO:1903507~negative regulation of nucleic acid-templated transcription	93	10.8518	1.69581e-09	ENSG00000131759, ENSG00000170242, ENSG00000257315, ENSG00000169946, ENSG00000080503, ENSG00000087074, ENSG00000100034, ENSG00000121297, ENSG00000160310, ENSG00000183955, ENSG00000132275, ENSG00000171223, ENSG00000126778, ENSG00000112837, ENSG00000173039, ENSG00000124782, ENSG00000015153, ENSG00000078699, ENSG00000010803, ENSG00000147862, ENSG00000141644, ENSG00000118689, ENSG00000136870, ENSG0000…	694	1177	16792	1.91183	1.0107e-05	2.65974e-07	3.28689e-06
GOTERM_BP_ALL	GO:2000113~negative regulation of cellular macromolecule biosynthetic process	101	11.7853	1.91733e-09	ENSG00000131759, ENSG00000170242, ENSG00000126070, ENSG00000257315, ENSG00000169946, ENSG00000080503, ENSG00000100034, ENSG00000087074, ENSG00000121297, ENSG00000183955, ENSG00000160310, ENSG00000132275, ENSG00000171223, ENSG00000126778, ENSG00000112837, ENSG00000173039, ENSG00000124782, ENSG00000015153, ENSG00000078699, ENSG00000204217, ENSG00000010803, ENSG00000147862, ENSG00000118689, ENSG0000…	694	1324	16792	1.84576	1.14272e-05	2.93007e-07	3.71624e-06
GOTERM_BP_ALL	GO:0009891~positive regulation of biosynthetic process	124	14.4691	2.43723e-09	ENSG00000138449, ENSG00000131759, ENSG00000179833, ENSG00000169946, ENSG00000105976, ENSG00000197461, ENSG00000080503, ENSG00000087074, ENSG00000160310, ENSG00000114166, ENSG00000176909, ENSG00000171223, ENSG00000126778, ENSG00000173039, ENSG00000181085, ENSG00000124782, ENSG00000078699, ENSG00000204217, ENSG00000118689, ENSG00000118495, ENSG00000116539, ENSG00000145675, ENSG00000183691, ENSG0000…	694	1760	16792	1.70472	1.45258e-05	3.63147e-07	4.72394e-06
GOTERM_BP_ALL	GO:0018130~heterocycle biosynthetic process	252	29.4049	2.47586e-09	ENSG00000131759, ENSG00000169946, ENSG00000087074, ENSG00000171223, ENSG00000114166, ENSG00000126778, ENSG00000181085, ENSG00000204524, ENSG00000078699, ENSG00000118495, ENSG00000141644, ENSG00000136870, ENSG00000116539, ENSG00000175395, ENSG00000214872, ENSG00000144026, ENSG00000168283, ENSG00000145675, ENSG00000178229, ENSG00000183691, ENSG00000164938, ENSG00000012174, ENSG00000128709, ENSG0000…	694	4411	16792	1.38231	1.4756e-05	3.59905e-07	4.7988e-06
GOTERM_BP_ALL	GO:0051253~negative regulation of RNA metabolic process	96	11.2019	2.52934e-09	ENSG00000131759, ENSG00000170242, ENSG00000257315, ENSG00000169946, ENSG00000080503, ENSG00000087074, ENSG00000100034, ENSG00000121297, ENSG00000160310, ENSG00000183955, ENSG00000132275, ENSG00000171223, ENSG00000126778, ENSG00000112837, ENSG00000173039, ENSG00000124782, ENSG00000015153, ENSG00000078699, ENSG00000010803, ENSG00000147862, ENSG00000141644, ENSG00000118689, ENSG00000136870, ENSG0000…	694	1240	16792	1.87324	1.50747e-05	3.58925e-07	4.90246e-06
GOTERM_BP_ALL	GO:0007275~multicellular organism development	273	31.8553	2.56314e-09	ENSG00000131759, ENSG00000107821, ENSG00000169946, ENSG00000154310, ENSG00000197461, ENSG00000067208, ENSG00000107130, ENSG00000171223, ENSG00000183688, ENSG00000126778, ENSG00000121957, ENSG00000078699, ENSG00000118495, ENSG00000141644, ENSG00000214872, ENSG00000121210, ENSG00000168283, ENSG00000145675, ENSG00000183691, ENSG00000185008, ENSG00000183386, ENSG00000128709, ENSG00000129596, ENSG0000…	694	4877	16792	1.35442	1.52762e-05	3.55264e-07	4.96799e-06
GOTERM_BP_ALL	GO:0060255~regulation of macromolecule metabolic process	314	36.6394	3.11931e-09	ENSG00000131759, ENSG00000126070, ENSG00000169946, ENSG00000154310, ENSG00000113448, ENSG00000197461, ENSG00000113240, ENSG00000087074, ENSG00000171223, ENSG00000114166, ENSG00000126778, ENSG00000166439, ENSG00000181085, ENSG00000204524, ENSG00000078699, ENSG00000118495, ENSG00000134030, ENSG00000141644, ENSG00000136870, ENSG00000175395, ENSG00000116539, ENSG00000214872, ENSG00000144026, ENSG0000…	694	5815	16792	1.30654	1.85909e-05	4.22525e-07	6.04598e-06
GOTERM_BP_ALL	GO:0048731~system development	246	28.7048	3.18234e-09	ENSG00000131759, ENSG00000169946, ENSG00000154310, ENSG00000197461, ENSG00000107130, ENSG00000171223, ENSG00000183688, ENSG00000126778, ENSG00000121957, ENSG00000078699, ENSG00000118495, ENSG00000141644, ENSG00000214872, ENSG00000121210, ENSG00000168283, ENSG00000145675, ENSG00000183691, ENSG00000185008, ENSG00000183386, ENSG00000128709, ENSG00000129596, ENSG00000053438, ENSG00000147526, ENSG0000…	694	4291	16792	1.38714	1.89666e-05	4.21484e-07	6.16814e-06
GOTERM_BP_ALL	GO:0031328~positive regulation of cellular biosynthetic process	121	14.119	5.94973e-09	ENSG00000138449, ENSG00000131759, ENSG00000179833, ENSG00000169946, ENSG00000105976, ENSG00000080503, ENSG00000197461, ENSG00000087074, ENSG00000160310, ENSG00000114166, ENSG00000176909, ENSG00000171223, ENSG00000126778, ENSG00000173039, ENSG00000181085, ENSG00000124782, ENSG00000078699, ENSG00000204217, ENSG00000118689, ENSG00000118495, ENSG00000116539, ENSG00000145675, ENSG00000183691, ENSG0000…	694	1729	16792	1.6933	3.54597e-05	7.70877e-07	1.1532e-05
GOTERM_BP_ALL	GO:0030323~respiratory tube development	28	3.26721	5.98125e-09	ENSG00000056586, ENSG00000169946, ENSG00000197461, ENSG00000117707, ENSG00000114861, ENSG00000138802, ENSG00000121957, ENSG00000112406, ENSG00000078246, ENSG00000204217, ENSG00000147862, ENSG00000102678, ENSG00000041982, ENSG00000163513, ENSG00000198162, ENSG00000183691, ENSG00000114315, ENSG00000164093, ENSG00000113971, ENSG00000127528, ENSG00000165240, ENSG00000171456, ENSG00000137497, ENSG0000…	694	180	16792	3.76382	3.56476e-05	7.58473e-07	1.15931e-05
GOTERM_BP_ALL	GO:0007517~muscle organ development	42	4.90082	6.45679e-09	ENSG00000169946, ENSG00000166949, ENSG00000117707, ENSG00000157240, ENSG00000198563, ENSG00000157514, ENSG00000196569, ENSG00000092969, ENSG00000126778, ENSG00000159388, ENSG00000114861, ENSG00000219626, ENSG00000179388, ENSG00000127418, ENSG00000118495, ENSG00000102678, ENSG00000140262, ENSG00000150347, ENSG00000129152, ENSG00000214872, ENSG00000120738, ENSG00000063660, ENSG00000163513, ENSG0000…	694	366	16792	2.77659	3.84818e-05	8.01718e-07	1.25148e-05
GOTERM_BP_ALL	GO:0080090~regulation of primary metabolic process	311	36.2894	8.78375e-09	ENSG00000131759, ENSG00000126070, ENSG00000169946, ENSG00000154310, ENSG00000113448, ENSG00000197461, ENSG00000113240, ENSG00000103227, ENSG00000087074, ENSG00000171223, ENSG00000114166, ENSG00000126778, ENSG00000166439, ENSG00000181085, ENSG00000204524, ENSG00000078699, ENSG00000118495, ENSG00000134030, ENSG00000141644, ENSG00000136870, ENSG00000175395, ENSG00000116539, ENSG00000214872, ENSG0000…	694	5798	16792	1.29785	5.23498e-05	1.06839e-06	1.7025e-05
GOTERM_BP_ALL	GO:0031323~regulation of cellular metabolic process	313	36.5228	9.05791e-09	ENSG00000131759, ENSG00000126070, ENSG00000169946, ENSG00000154310, ENSG00000113448, ENSG00000197461, ENSG00000113240, ENSG00000103227, ENSG00000087074, ENSG00000171223, ENSG00000114166, ENSG00000126778, ENSG00000166439, ENSG00000181085, ENSG00000204524, ENSG00000078699, ENSG00000118495, ENSG00000134030, ENSG00000141644, ENSG00000136870, ENSG00000175395, ENSG00000116539, ENSG00000214872, ENSG0000…	694	5844	16792	1.29592	5.39837e-05	1.0797e-06	1.75564e-05
GOTERM_BP_ALL	GO:0016070~RNA metabolic process	260	30.3384	9.36494e-09	ENSG00000131759, ENSG00000126070, ENSG00000169946, ENSG00000113240, ENSG00000087074, ENSG00000171223, ENSG00000114166, ENSG00000126778, ENSG00000204524, ENSG00000078699, ENSG00000118495, ENSG00000134030, ENSG00000141644, ENSG00000136870, ENSG00000116539, ENSG00000175395, ENSG00000214872, ENSG00000144026, ENSG00000168283, ENSG00000145675, ENSG00000178229, ENSG00000183691, ENSG00000164938, ENSG0000…	694	4648	16792	1.35347	5.58135e-05	1.09441e-06	1.81515e-05
GOTERM_BP_ALL	GO:0031327~negative regulation of cellular biosynthetic process	107	12.4854	1.06139e-08	ENSG00000131759, ENSG00000126070, ENSG00000257315, ENSG00000169946, ENSG00000080503, ENSG00000197461, ENSG00000087074, ENSG00000160310, ENSG00000121297, ENSG00000171223, ENSG00000126778, ENSG00000112837, ENSG00000173039, ENSG00000124782, ENSG00000078699, ENSG00000204217, ENSG00000141644, ENSG00000118689, ENSG00000136870, ENSG00000214872, ENSG00000150347, ENSG00000168283, ENSG00000183691, ENSG0000…	694	1480	16792	1.7493	6.32569e-05	1.21652e-06	2.05723e-05
GOTERM_BP_ALL	GO:0045934~negative regulation of nucleobase-containing compound metabolic process	101	11.7853	1.18379e-08	ENSG00000131759, ENSG00000257315, ENSG00000169946, ENSG00000080503, ENSG00000087074, ENSG00000160310, ENSG00000121297, ENSG00000171223, ENSG00000166439, ENSG00000126778, ENSG00000173039, ENSG00000112837, ENSG00000124782, ENSG00000078699, ENSG00000204217, ENSG00000141644, ENSG00000118689, ENSG00000136870, ENSG00000214872, ENSG00000150347, ENSG00000168283, ENSG00000183691, ENSG00000073614, ENSG0000…	694	1371	16792	1.78249	7.05513e-05	1.3312e-06	2.29447e-05
GOTERM_BP_ALL	GO:0009059~macromolecule biosynthetic process	283	33.0222	1.20914e-08	ENSG00000131759, ENSG00000126070, ENSG00000169946, ENSG00000078142, ENSG00000197461, ENSG00000103227, ENSG00000087074, ENSG00000171223, ENSG00000114166, ENSG00000126778, ENSG00000181085, ENSG00000204524, ENSG00000078699, ENSG00000196998, ENSG00000118495, ENSG00000134030, ENSG00000141644, ENSG00000136870, ENSG00000116539, ENSG00000175395, ENSG00000214872, ENSG00000144026, ENSG00000168283, ENSG0000…	694	5175	16792	1.32318	7.20624e-05	1.33454e-06	2.34361e-05
GOTERM_BP_ALL	GO:0010629~negative regulation of gene expression	107	12.4854	1.23627e-08	ENSG00000131759, ENSG00000126070, ENSG00000257315, ENSG00000169946, ENSG00000080503, ENSG00000087074, ENSG00000160310, ENSG00000121297, ENSG00000171223, ENSG00000126778, ENSG00000112837, ENSG00000173039, ENSG00000124782, ENSG00000078699, ENSG00000141644, ENSG00000118689, ENSG00000136870, ENSG00000214872, ENSG00000150347, ENSG00000168283, ENSG00000183691, ENSG00000073614, ENSG00000164938, ENSG0000…	694	1485	16792	1.74341	7.36792e-05	1.33967e-06	2.3962e-05
GOTERM_BP_ALL	GO:0090304~nucleic acid metabolic process	282	32.9055	1.35104e-08	ENSG00000131759, ENSG00000126070, ENSG00000169946, ENSG00000197461, ENSG00000113240, ENSG00000087074, ENSG00000171223, ENSG00000114166, ENSG00000126778, ENSG00000166439, ENSG00000181085, ENSG00000204524, ENSG00000078699, ENSG00000118495, ENSG00000134030, ENSG00000141644, ENSG00000136870, ENSG00000116539, ENSG00000175395, ENSG00000214872, ENSG00000144026, ENSG00000168283, ENSG00000145675, ENSG0000…	694	5158	16792	1.32285	8.0519e-05	1.4379e-06	2.61865e-05
GOTERM_BP_ALL	GO:0045595~regulation of cell differentiation	110	12.8355	1.39382e-08	ENSG00000131759, ENSG00000154310, ENSG00000169946, ENSG00000107130, ENSG00000176909, ENSG00000171223, ENSG00000126778, ENSG00000183688, ENSG00000173039, ENSG00000124782, ENSG00000078699, ENSG00000204217, ENSG00000141644, ENSG00000118689, ENSG00000121210, ENSG00000163513, ENSG00000145675, ENSG00000183691, ENSG00000044524, ENSG00000145147, ENSG00000185008, ENSG00000164938, ENSG00000163909, ENSG0000…	694	1544	16792	1.72381	8.30685e-05	1.4574e-06	2.70156e-05
GOTERM_BP_ALL	GO:0009888~tissue development	121	14.119	1.44983e-08	ENSG00000138449, ENSG00000131759, ENSG00000169946, ENSG00000105976, ENSG00000113448, ENSG00000197461, ENSG00000171223, ENSG00000126778, ENSG00000183688, ENSG00000173039, ENSG00000172037, ENSG00000121957, ENSG00000124782, ENSG00000064655, ENSG00000170962, ENSG00000078699, ENSG00000204217, ENSG00000118495, ENSG00000150347, ENSG00000163513, ENSG00000183691, ENSG00000170802, ENSG00000145147, ENSG0000…	694	1756	16792	1.66726	8.64058e-05	1.48982e-06	2.81011e-05
GOTERM_BP_ALL	GO:1901362~organic cyclic compound biosynthetic process	254	29.6383	1.45107e-08	ENSG00000131759, ENSG00000169946, ENSG00000087074, ENSG00000171223, ENSG00000114166, ENSG00000126778, ENSG00000181085, ENSG00000204524, ENSG00000078699, ENSG00000118495, ENSG00000141644, ENSG00000136870, ENSG00000116539, ENSG00000175395, ENSG00000214872, ENSG00000144026, ENSG00000168283, ENSG00000145675, ENSG00000178229, ENSG00000183691, ENSG00000164938, ENSG00000012174, ENSG00000128709, ENSG0000…	694	4535	16792	1.35519	8.64798e-05	1.46582e-06	2.81251e-05
GOTERM_BP_ALL	GO:0010558~negative regulation of macromolecule biosynthetic process	103	12.0187	1.69062e-08	ENSG00000131759, ENSG00000126070, ENSG00000257315, ENSG00000169946, ENSG00000080503, ENSG00000087074, ENSG00000160310, ENSG00000121297, ENSG00000171223, ENSG00000126778, ENSG00000112837, ENSG00000173039, ENSG00000124782, ENSG00000078699, ENSG00000204217, ENSG00000141644, ENSG00000118689, ENSG00000136870, ENSG00000214872, ENSG00000150347, ENSG00000168283, ENSG00000183691, ENSG00000073614, ENSG0000…	694	1418	16792	1.75753	0.000100756	1.67935e-06	3.27683e-05
GOTERM_BP_ALL	GO:0065007~biological regulation	542	63.2439	1.75616e-08	ENSG00000131759, ENSG00000126070, ENSG00000169946, ENSG00000078142, ENSG00000113448, ENSG00000113240, ENSG00000103227, ENSG00000144227, ENSG00000067208, ENSG00000087074, ENSG00000171223, ENSG00000166439, ENSG00000126778, ENSG00000183688, ENSG00000113441, ENSG00000182923, ENSG00000121957, ENSG00000181085, ENSG00000204524, ENSG00000136878, ENSG00000141644, ENSG00000118495, ENSG00000136870, ENSG0000…	694	11548	16792	1.13563	0.000104662	1.71586e-06	3.40387e-05
GOTERM_BP_ALL	GO:0050789~regulation of biological process	518	60.4434	2.14821e-08	ENSG00000131759, ENSG00000126070, ENSG00000169946, ENSG00000078142, ENSG00000113448, ENSG00000113240, ENSG00000103227, ENSG00000144227, ENSG00000067208, ENSG00000087074, ENSG00000171223, ENSG00000166439, ENSG00000126778, ENSG00000183688, ENSG00000113441, ENSG00000182923, ENSG00000121957, ENSG00000181085, ENSG00000204524, ENSG00000136878, ENSG00000141644, ENSG00000118495, ENSG00000136870, ENSG0000…	694	10922	16792	1.14755	0.000128025	2.06505e-06	4.16375e-05
GOTERM_BP_ALL	GO:0060537~muscle tissue development	41	4.78413	2.14839e-08	ENSG00000131759, ENSG00000169946, ENSG00000166949, ENSG00000117707, ENSG00000181744, ENSG00000198563, ENSG00000157514, ENSG00000092969, ENSG00000126778, ENSG00000159388, ENSG00000075223, ENSG00000114861, ENSG00000064655, ENSG00000219626, ENSG00000204217, ENSG00000118495, ENSG00000102678, ENSG00000129152, ENSG00000120738, ENSG00000063660, ENSG00000163513, ENSG00000123358, ENSG00000183691, ENSG0000…	694	367	16792	2.70309	0.000128036	2.03244e-06	4.16409e-05
GOTERM_BP_ALL	GO:0000122~negative regulation of transcription from RNA polymerase II promoter	65	7.5846	2.37514e-08	ENSG00000131759, ENSG00000169946, ENSG00000080503, ENSG00000087074, ENSG00000183955, ENSG00000121297, ENSG00000171223, ENSG00000126778, ENSG00000112837, ENSG00000173039, ENSG00000124782, ENSG00000147862, ENSG00000141644, ENSG00000118689, ENSG00000136870, ENSG00000170854, ENSG00000150347, ENSG00000168283, ENSG00000163848, ENSG00000183691, ENSG00000073614, ENSG00000125812, ENSG00000114315, ENSG0000…	694	748	16792	2.10259	0.000141548	2.21185e-06	4.60359e-05
GOTERM_BP_ALL	GO:0009890~negative regulation of biosynthetic process	107	12.4854	2.46946e-08	ENSG00000131759, ENSG00000126070, ENSG00000257315, ENSG00000169946, ENSG00000080503, ENSG00000197461, ENSG00000087074, ENSG00000160310, ENSG00000121297, ENSG00000171223, ENSG00000126778, ENSG00000112837, ENSG00000173039, ENSG00000124782, ENSG00000078699, ENSG00000204217, ENSG00000141644, ENSG00000118689, ENSG00000136870, ENSG00000214872, ENSG00000150347, ENSG00000168283, ENSG00000183691, ENSG0000…	694	1504	16792	1.72139	0.000147169	2.2643e-06	4.7864e-05
GOTERM_BP_ALL	GO:0050793~regulation of developmental process	139	16.2194	2.69633e-08	ENSG00000131759, ENSG00000154310, ENSG00000169946, ENSG00000197461, ENSG00000067208, ENSG00000107130, ENSG00000176909, ENSG00000126778, ENSG00000183688, ENSG00000112837, ENSG00000173039, ENSG00000179542, ENSG00000124782, ENSG00000170962, ENSG00000078699, ENSG00000204217, ENSG00000141644, ENSG00000118689, ENSG00000121210, ENSG00000176438, ENSG00000163513, ENSG00000145675, ENSG00000183691, ENSG0000…	694	2129	16792	1.57973	0.000160689	2.43487e-06	5.22614e-05
GOTERM_BP_ALL	GO:0051172~negative regulation of nitrogen compound metabolic process	107	12.4854	2.71574e-08	ENSG00000131759, ENSG00000126070, ENSG00000257315, ENSG00000169946, ENSG00000080503, ENSG00000087074, ENSG00000160310, ENSG00000121297, ENSG00000171223, ENSG00000166439, ENSG00000126778, ENSG00000112837, ENSG00000173039, ENSG00000124782, ENSG00000078699, ENSG00000204217, ENSG00000141644, ENSG00000118689, ENSG00000136870, ENSG00000214872, ENSG00000150347, ENSG00000168283, ENSG00000183691, ENSG0000…	694	1506	16792	1.7191	0.000161845	2.41579e-06	5.26375e-05
GOTERM_BP_ALL	GO:0007399~nervous system development	141	16.4527	2.74009e-08	ENSG00000131759, ENSG00000154310, ENSG00000080503, ENSG00000107130, ENSG00000126778, ENSG00000173039, ENSG00000172037, ENSG00000179542, ENSG00000078699, ENSG00000204217, ENSG00000141644, ENSG00000118689, ENSG00000198795, ENSG00000163513, ENSG00000140937, ENSG00000183691, ENSG00000044524, ENSG00000145147, ENSG00000185008, ENSG00000163909, ENSG00000128709, ENSG00000204406, ENSG00000144485, ENSG0000…	694	2170	16792	1.57218	0.000163296	2.4016e-06	5.31094e-05
GOTERM_BP_ALL	GO:0014706~striated muscle tissue development	39	4.55076	5.40673e-08	ENSG00000131759, ENSG00000169946, ENSG00000117707, ENSG00000181744, ENSG00000198563, ENSG00000157514, ENSG00000092969, ENSG00000126778, ENSG00000159388, ENSG00000075223, ENSG00000114861, ENSG00000064655, ENSG00000219626, ENSG00000204217, ENSG00000118495, ENSG00000102678, ENSG00000129152, ENSG00000120738, ENSG00000063660, ENSG00000163513, ENSG00000123358, ENSG00000183691, ENSG00000124006, ENSG0000…	694	350	16792	2.69612	0.000322189	4.67015e-06	0.000104795
GOTERM_BP_ALL	GO:2000026~regulation of multicellular organismal development	117	13.6523	5.69805e-08	ENSG00000131759, ENSG00000169946, ENSG00000154310, ENSG00000197461, ENSG00000107130, ENSG00000126778, ENSG00000183688, ENSG00000112837, ENSG00000173039, ENSG00000179542, ENSG00000124782, ENSG00000170962, ENSG00000078699, ENSG00000204217, ENSG00000141644, ENSG00000118689, ENSG00000121210, ENSG00000163513, ENSG00000145675, ENSG00000183691, ENSG00000044524, ENSG00000145147, ENSG00000185008, ENSG0000…	694	1721	16792	1.64493	0.000339546	4.85147e-06	0.000110442
GOTERM_BP_ALL	GO:0010604~positive regulation of macromolecule metabolic process	173	20.1867	6.32549e-08	ENSG00000138449, ENSG00000131759, ENSG00000126070, ENSG00000179833, ENSG00000154310, ENSG00000169946, ENSG00000105976, ENSG00000197461, ENSG00000080503, ENSG00000087074, ENSG00000160310, ENSG00000114166, ENSG00000176909, ENSG00000171223, ENSG00000126778, ENSG00000173039, ENSG00000181085, ENSG00000124782, ENSG00000064655, ENSG00000170962, ENSG00000078699, ENSG00000204217, ENSG00000118495, ENSG0000…	694	2856	16792	1.46565	0.000376928	5.30983e-06	0.000122603
GOTERM_BP_ALL	GO:0030324~lung development	26	3.03384	6.59143e-08	ENSG00000056586, ENSG00000169946, ENSG00000197461, ENSG00000117707, ENSG00000114861, ENSG00000138802, ENSG00000121957, ENSG00000204217, ENSG00000147862, ENSG00000102678, ENSG00000041982, ENSG00000163513, ENSG00000198162, ENSG00000183691, ENSG00000114315, ENSG00000164093, ENSG00000113971, ENSG00000127528, ENSG00000165240, ENSG00000171456, ENSG00000137497, ENSG00000104313, ENSG00000138834, ENSG0000…	694	176	16792	3.5744	0.000392772	5.45622e-06	0.000127758
GOTERM_BP_ALL	GO:0000904~cell morphogenesis involved in differentiation	64	7.46791	7.04227e-08	ENSG00000154310, ENSG00000105976, ENSG00000138696, ENSG00000196569, ENSG00000183688, ENSG00000172037, ENSG00000179542, ENSG00000124782, ENSG00000204217, ENSG00000165379, ENSG00000147862, ENSG00000127418, ENSG00000163513, ENSG00000182636, ENSG00000140937, ENSG00000183691, ENSG00000197380, ENSG00000122877, ENSG00000044524, ENSG00000145147, ENSG00000185008, ENSG00000114315, ENSG00000163909, ENSG0000…	694	753	16792	2.0565	0.000419632	5.74957e-06	0.000136496
GOTERM_BP_ALL	GO:0019222~regulation of metabolic process	322	37.5729	8.61956e-08	ENSG00000131759, ENSG00000126070, ENSG00000169946, ENSG00000154310, ENSG00000113448, ENSG00000197461, ENSG00000113240, ENSG00000103227, ENSG00000087074, ENSG00000171223, ENSG00000114166, ENSG00000126778, ENSG00000166439, ENSG00000181085, ENSG00000204524, ENSG00000078699, ENSG00000118495, ENSG00000134030, ENSG00000141644, ENSG00000136870, ENSG00000175395, ENSG00000116539, ENSG00000214872, ENSG0000…	694	6171	16792	1.26253	0.000513594	6.94221e-06	0.000167068
GOTERM_BP_ALL	GO:0048699~generation of neurons	97	11.3186	1.05563e-07	ENSG00000131759, ENSG00000154310, ENSG00000138696, ENSG00000168172, ENSG00000107130, ENSG00000196569, ENSG00000126778, ENSG00000172037, ENSG00000173039, ENSG00000179542, ENSG00000006607, ENSG00000078246, ENSG00000078699, ENSG00000204217, ENSG00000147862, ENSG00000165379, ENSG00000141644, ENSG00000118689, ENSG00000198795, ENSG00000099864, ENSG00000182636, ENSG00000140937, ENSG00000183691, ENSG0000…	694	1357	16792	1.72956	0.000628956	8.38869e-06	0.000204606
GOTERM_BP_ALL	GO:0048869~cellular developmental process	225	26.2544	1.10804e-07	ENSG00000131759, ENSG00000107821, ENSG00000169946, ENSG00000154310, ENSG00000113448, ENSG00000067208, ENSG00000107130, ENSG00000171223, ENSG00000183688, ENSG00000126778, ENSG00000121957, ENSG00000078699, ENSG00000141644, ENSG00000118495, ENSG00000121210, ENSG00000145675, ENSG00000183691, ENSG00000164938, ENSG00000185008, ENSG00000128709, ENSG00000053438, ENSG00000070193, ENSG00000198718, ENSG0000…	694	3992	16792	1.36375	0.000660175	8.68935e-06	0.000214765
GOTERM_BP_ALL	GO:0030154~cell differentiation	209	24.3874	1.31463e-07	ENSG00000131759, ENSG00000107821, ENSG00000169946, ENSG00000154310, ENSG00000113448, ENSG00000107130, ENSG00000171223, ENSG00000183688, ENSG00000126778, ENSG00000121957, ENSG00000078699, ENSG00000141644, ENSG00000118495, ENSG00000121210, ENSG00000145675, ENSG00000183691, ENSG00000185008, ENSG00000164938, ENSG00000128709, ENSG00000053438, ENSG00000070193, ENSG00000173482, ENSG00000166949, ENSG0000…	694	3652	16792	1.38471	0.000783214	1.01755e-05	0.000254807
GOTERM_BP_ALL	GO:0061448~connective tissue development	30	3.50058	1.51325e-07	ENSG00000131759, ENSG00000138696, ENSG00000169762, ENSG00000166949, ENSG00000105204, ENSG00000092969, ENSG00000183688, ENSG00000120451, ENSG00000178882, ENSG00000148516, ENSG00000173039, ENSG00000170962, ENSG00000204217, ENSG00000147862, ENSG00000162337, ENSG00000102678, ENSG00000150347, ENSG00000043039, ENSG00000120693, ENSG00000120738, ENSG00000163513, ENSG00000144320, ENSG00000183691, ENSG0000…	694	236	16792	3.07576	0.000901491	1.15627e-05	0.000293304
GOTERM_BP_ALL	GO:0044271~cellular nitrogen compound biosynthetic process	267	31.1552	1.65463e-07	ENSG00000131759, ENSG00000126070, ENSG00000169946, ENSG00000087074, ENSG00000171223, ENSG00000114166, ENSG00000126778, ENSG00000181085, ENSG00000204524, ENSG00000078699, ENSG00000118495, ENSG00000134030, ENSG00000141644, ENSG00000136870, ENSG00000116539, ENSG00000175395, ENSG00000214872, ENSG00000144026, ENSG00000168283, ENSG00000145675, ENSG00000178229, ENSG00000183691, ENSG00000164938, ENSG0000…	694	4947	16792	1.30591	0.000985674	1.2483e-05	0.000320707
GOTERM_BP_ALL	GO:0048523~negative regulation of cellular process	238	27.7713	1.73406e-07	ENSG00000131759, ENSG00000126070, ENSG00000169946, ENSG00000113448, ENSG00000197461, ENSG00000087074, ENSG00000171223, ENSG00000114166, ENSG00000183688, ENSG00000126778, ENSG00000166439, ENSG00000078699, ENSG00000118495, ENSG00000141644, ENSG00000076641, ENSG00000136870, ENSG00000116539, ENSG00000214872, ENSG00000121210, ENSG00000168283, ENSG00000145675, ENSG00000183691, ENSG00000164938, ENSG0000…	694	4300	16792	1.33922	0.00103297	1.29187e-05	0.000336103
GOTERM_BP_ALL	GO:0010467~gene expression	282	32.9055	2.39807e-07	ENSG00000131759, ENSG00000126070, ENSG00000169946, ENSG00000078142, ENSG00000113240, ENSG00000103227, ENSG00000087074, ENSG00000171223, ENSG00000114166, ENSG00000126778, ENSG00000204524, ENSG00000078699, ENSG00000118495, ENSG00000134030, ENSG00000141644, ENSG00000136870, ENSG00000116539, ENSG00000175395, ENSG00000214872, ENSG00000144026, ENSG00000168283, ENSG00000145675, ENSG00000178229, ENSG0000…	694	5306	16792	1.28595	0.00142823	1.76449e-05	0.000464803
GOTERM_BP_ALL	GO:0048468~cell development	127	14.8191	2.51931e-07	ENSG00000131759, ENSG00000154310, ENSG00000105976, ENSG00000113448, ENSG00000080503, ENSG00000160310, ENSG00000107130, ENSG00000126778, ENSG00000183688, ENSG00000173039, ENSG00000172037, ENSG00000179542, ENSG00000124782, ENSG00000078699, ENSG00000204217, ENSG00000141644, ENSG00000118689, ENSG00000150347, ENSG00000163513, ENSG00000140937, ENSG00000072364, ENSG00000183691, ENSG00000044524, ENSG0000…	694	1968	16792	1.56143	0.00150039	1.8311e-05	0.000488303
GOTERM_BP_ALL	GO:0060284~regulation of cell development	68	7.93466	2.57909e-07	ENSG00000131759, ENSG00000154310, ENSG00000168172, ENSG00000198563, ENSG00000107130, ENSG00000126778, ENSG00000183688, ENSG00000178882, ENSG00000173039, ENSG00000124782, ENSG00000078699, ENSG00000204217, ENSG00000141644, ENSG00000118689, ENSG00000099864, ENSG00000163513, ENSG00000183691, ENSG00000197380, ENSG00000044524, ENSG00000145147, ENSG00000185008, ENSG00000114315, ENSG00000163909, ENSG0000…	694	851	16792	1.9334	0.00153596	1.85195e-05	0.000499888
GOTERM_BP_ALL	GO:0044260~cellular macromolecule metabolic process	412	48.0747	2.75323e-07	ENSG00000131759, ENSG00000126070, ENSG00000169946, ENSG00000183496, ENSG00000078142, ENSG00000113448, ENSG00000113240, ENSG00000185019, ENSG00000103227, ENSG00000087074, ENSG00000171223, ENSG00000166439, ENSG00000126778, ENSG00000113441, ENSG00000181085, ENSG00000204524, ENSG00000136878, ENSG00000196998, ENSG00000118495, ENSG00000141644, ENSG00000136870, ENSG00000116539, ENSG00000144026, ENSG0000…	694	8387	16792	1.18859	0.00163958	1.95346e-05	0.00053364
GOTERM_BP_ALL	GO:0022008~neurogenesis	100	11.6686	3.24464e-07	ENSG00000131759, ENSG00000154310, ENSG00000107130, ENSG00000126778, ENSG00000173039, ENSG00000172037, ENSG00000179542, ENSG00000078699, ENSG00000204217, ENSG00000141644, ENSG00000118689, ENSG00000198795, ENSG00000140937, ENSG00000183691, ENSG00000044524, ENSG00000145147, ENSG00000185008, ENSG00000163909, ENSG00000128709, ENSG00000053438, ENSG00000070193, ENSG00000153707, ENSG00000173482, ENSG0000…	694	1447	16792	1.67215	0.00193194	2.27504e-05	0.000628887
GOTERM_BP_ALL	GO:0000902~cell morphogenesis	89	10.3851	3.39737e-07	ENSG00000023902, ENSG00000154310, ENSG00000105976, ENSG00000138696, ENSG00000067208, ENSG00000196569, ENSG00000183688, ENSG00000172037, ENSG00000109680, ENSG00000179542, ENSG00000158079, ENSG00000124782, ENSG00000204217, ENSG00000165379, ENSG00000147862, ENSG00000127418, ENSG00000169221, ENSG00000099864, ENSG00000115935, ENSG00000182636, ENSG00000163513, ENSG00000176438, ENSG00000140937, ENSG0000…	694	1240	16792	1.73665	0.00202278	2.35443e-05	0.000658489
GOTERM_BP_ALL	GO:0071495~cellular response to endogenous stimulus	86	10.035	3.46331e-07	ENSG00000131759, ENSG00000174136, ENSG00000138696, ENSG00000084636, ENSG00000113448, ENSG00000160310, ENSG00000083750, ENSG00000114166, ENSG00000171223, ENSG00000173039, ENSG00000170962, ENSG00000179388, ENSG00000204217, ENSG00000127418, ENSG00000118689, ENSG00000163513, ENSG00000005882, ENSG00000213366, ENSG00000145675, ENSG00000164758, ENSG00000183691, ENSG00000145147, ENSG00000185008, ENSG0000…	694	1185	16792	1.75599	0.00206201	2.37254e-05	0.000671271
GOTERM_BP_ALL	GO:0048522~positive regulation of cellular process	256	29.8716	3.86972e-07	ENSG00000131759, ENSG00000126070, ENSG00000169946, ENSG00000154310, ENSG00000084636, ENSG00000197461, ENSG00000087074, ENSG00000107130, ENSG00000171223, ENSG00000114166, ENSG00000126778, ENSG00000181085, ENSG00000131375, ENSG00000078699, ENSG00000118495, ENSG00000076641, ENSG00000116539, ENSG00000147145, ENSG00000168283, ENSG00000145675, ENSG00000183691, ENSG00000164938, ENSG00000185008, ENSG0000…	694	4744	16792	1.30568	0.00230369	2.62082e-05	0.000750041
GOTERM_BP_ALL	GO:0001667~ameboidal-type cell migration	35	4.08401	4.51029e-07	ENSG00000173482, ENSG00000102606, ENSG00000105976, ENSG00000117707, ENSG00000100034, ENSG00000124205, ENSG00000092969, ENSG00000075223, ENSG00000131375, ENSG00000114861, ENSG00000124782, ENSG00000204217, ENSG00000179388, ENSG00000133121, ENSG00000181751, ENSG00000162337, ENSG00000150347, ENSG00000169554, ENSG00000168874, ENSG00000163513, ENSG00000122694, ENSG00000123358, ENSG00000188613, ENSG0000…	694	320	16792	2.64643	0.00268452	3.02033e-05	0.000874199
GOTERM_BP_ALL	GO:0001501~skeletal system development	46	5.36756	4.52299e-07	ENSG00000131759, ENSG00000175879, ENSG00000167244, ENSG00000138696, ENSG00000169762, ENSG00000166949, ENSG00000121989, ENSG00000092969, ENSG00000126778, ENSG00000120451, ENSG00000183688, ENSG00000178882, ENSG00000173039, ENSG00000148516, ENSG00000114861, ENSG00000145431, ENSG00000078246, ENSG00000129757, ENSG00000204217, ENSG00000078399, ENSG00000147862, ENSG00000162337, ENSG00000127418, ENSG0000…	694	490	16792	2.27146	0.00269207	2.99518e-05	0.00087666
GOTERM_BP_ALL	GO:0051960~regulation of nervous system development	62	7.23454	7.29463e-07	ENSG00000131759, ENSG00000154310, ENSG00000168172, ENSG00000107130, ENSG00000126778, ENSG00000173039, ENSG00000179542, ENSG00000078246, ENSG00000078699, ENSG00000204217, ENSG00000141644, ENSG00000118689, ENSG00000099864, ENSG00000183691, ENSG00000044524, ENSG00000145147, ENSG00000185008, ENSG00000150471, ENSG00000114315, ENSG00000163909, ENSG00000010810, ENSG00000138814, ENSG00000116584, ENSG0000…	694	769	16792	1.95078	0.00433817	4.77747e-05	0.00141387
GOTERM_BP_ALL	GO:0030182~neuron differentiation	87	10.1517	7.47073e-07	ENSG00000131759, ENSG00000154310, ENSG00000138696, ENSG00000107130, ENSG00000196569, ENSG00000126778, ENSG00000172037, ENSG00000179542, ENSG00000006607, ENSG00000078246, ENSG00000078699, ENSG00000204217, ENSG00000165379, ENSG00000147862, ENSG00000141644, ENSG00000118689, ENSG00000198795, ENSG00000099864, ENSG00000182636, ENSG00000140937, ENSG00000183691, ENSG00000122877, ENSG00000044524, ENSG0000…	694	1226	16792	1.71701	0.00444266	4.83962e-05	0.001448
GOTERM_BP_ALL	GO:0003151~outflow tract morphogenesis	15	1.75029	8.261e-07	ENSG00000131759, ENSG00000163513, ENSG00000169946, ENSG00000183691, ENSG00000157240, ENSG00000114315, ENSG00000164093, ENSG00000163909, ENSG00000092969, ENSG00000126778, ENSG00000075223, ENSG00000138802, ENSG00000204217, ENSG00000104313, ENSG00000197702	694	70	16792	5.18485	0.00491145	5.29401e-05	0.00160117
GOTERM_BP_ALL	GO:0006139~nucleobase-containing compound metabolic process	300	35.0058	9.07295e-07	ENSG00000131759, ENSG00000126070, ENSG00000169946, ENSG00000113448, ENSG00000197461, ENSG00000113240, ENSG00000087074, ENSG00000171223, ENSG00000114166, ENSG00000126778, ENSG00000166439, ENSG00000181085, ENSG00000204524, ENSG00000078699, ENSG00000118495, ENSG00000134030, ENSG00000141644, ENSG00000136870, ENSG00000116539, ENSG00000175395, ENSG00000214872, ENSG00000144026, ENSG00000168283, ENSG0000…	694	5794	16792	1.25281	0.00539289	5.75247e-05	0.00175854
GOTERM_BP_ALL	GO:0006725~cellular aromatic compound metabolic process	307	35.8226	1.05523e-06	ENSG00000131759, ENSG00000126070, ENSG00000169946, ENSG00000113448, ENSG00000197461, ENSG00000113240, ENSG00000087074, ENSG00000171223, ENSG00000114166, ENSG00000126778, ENSG00000166439, ENSG00000181085, ENSG00000204524, ENSG00000078699, ENSG00000118495, ENSG00000134030, ENSG00000141644, ENSG00000136870, ENSG00000175395, ENSG00000116539, ENSG00000214872, ENSG00000144026, ENSG00000168283, ENSG0000…	694	5965	16792	1.24529	0.00626943	6.61995e-05	0.00204526
GOTERM_BP_ALL	GO:0009719~response to endogenous stimulus	103	12.0187	1.18836e-06	ENSG00000131759, ENSG00000078142, ENSG00000084636, ENSG00000113448, ENSG00000160310, ENSG00000114166, ENSG00000171223, ENSG00000173039, ENSG00000170962, ENSG00000204217, ENSG00000141644, ENSG00000118689, ENSG00000163513, ENSG00000145675, ENSG00000183691, ENSG00000145147, ENSG00000185008, ENSG00000187486, ENSG00000163909, ENSG00000204406, ENSG00000129596, ENSG00000160867, ENSG00000117586, ENSG0000…	694	1548	16792	1.60994	0.00705762	7.37748e-05	0.00230331
GOTERM_BP_ALL	GO:0060538~skeletal muscle organ development	24	2.80047	1.21605e-06	ENSG00000063660, ENSG00000123358, ENSG00000170802, ENSG00000122877, ENSG00000157514, ENSG00000005513, ENSG00000164093, ENSG00000163909, ENSG00000145794, ENSG00000126778, ENSG00000128709, ENSG00000159388, ENSG00000114861, ENSG00000138814, ENSG00000219626, ENSG00000100625, ENSG00000127418, ENSG00000179456, ENSG00000118495, ENSG00000064309, ENSG00000129152, ENSG00000139687, ENSG00000170162, ENSG0000…	694	178	16792	3.26238	0.00722145	7.47153e-05	0.00235697
GOTERM_BP_ALL	GO:0031325~positive regulation of cellular metabolic process	166	19.3699	1.31847e-06	ENSG00000138449, ENSG00000131759, ENSG00000179833, ENSG00000154310, ENSG00000169946, ENSG00000105976, ENSG00000197461, ENSG00000080503, ENSG00000087074, ENSG00000160310, ENSG00000114166, ENSG00000176909, ENSG00000171223, ENSG00000126778, ENSG00000173039, ENSG00000181085, ENSG00000124782, ENSG00000064655, ENSG00000170962, ENSG00000078699, ENSG00000204217, ENSG00000118495, ENSG00000118689, ENSG0000…	694	2839	16792	1.41477	0.00782728	8.01812e-05	0.00255548
GOTERM_BP_ALL	GO:0035914~skeletal muscle cell differentiation	14	1.63361	1.40068e-06	ENSG00000063660, ENSG00000123358, ENSG00000170802, ENSG00000122877, ENSG00000005513, ENSG00000163909, ENSG00000145794, ENSG00000159388, ENSG00000100625, ENSG00000118495, ENSG00000064309, ENSG00000129152, ENSG00000139687, ENSG00000120738	694	63	16792	5.37688	0.00831332	8.43204e-05	0.00271482
GOTERM_BP_ALL	GO:0060412~ventricular septum morphogenesis	11	1.28355	1.70101e-06	ENSG00000163513, ENSG00000169946, ENSG00000183691, ENSG00000204217, ENSG00000117707, ENSG00000157240, ENSG00000127418, ENSG00000114315, ENSG00000164093, ENSG00000163909, ENSG00000092969	694	37	16792	7.1934	0.0100868	0.000101375	0.00329692
GOTERM_BP_ALL	GO:0048513~animal organ development	179	20.8868	1.76215e-06	ENSG00000138449, ENSG00000131759, ENSG00000169946, ENSG00000197461, ENSG00000171223, ENSG00000126778, ENSG00000183688, ENSG00000172037, ENSG00000173039, ENSG00000121957, ENSG00000124782, ENSG00000170962, ENSG00000204217, ENSG00000118495, ENSG00000141644, ENSG00000118689, ENSG00000150347, ENSG00000214872, ENSG00000121210, ENSG00000168283, ENSG00000163513, ENSG00000145675, ENSG00000183691, ENSG0000…	694	3129	16792	1.38417	0.0104475	0.000103979	0.00341542
GOTERM_BP_ALL	GO:0007519~skeletal muscle tissue development	23	2.68378	2.0129e-06	ENSG00000063660, ENSG00000123358, ENSG00000170802, ENSG00000122877, ENSG00000157514, ENSG00000005513, ENSG00000164093, ENSG00000163909, ENSG00000145794, ENSG00000126778, ENSG00000128709, ENSG00000159388, ENSG00000114861, ENSG00000138814, ENSG00000219626, ENSG00000100625, ENSG00000179456, ENSG00000118495, ENSG00000064309, ENSG00000129152, ENSG00000139687, ENSG00000170162, ENSG00000120738	694	170	16792	3.27357	0.0119252	0.00011761	0.00390141
GOTERM_BP_ALL	GO:0001822~kidney development	30	3.50058	2.02341e-06	ENSG00000131759, ENSG00000168769, ENSG00000166949, ENSG00000197461, ENSG00000117707, ENSG00000154734, ENSG00000092969, ENSG00000126778, ENSG00000197603, ENSG00000172037, ENSG00000170962, ENSG00000129757, ENSG00000150347, ENSG00000171016, ENSG00000120693, ENSG00000120738, ENSG00000125931, ENSG00000183691, ENSG00000170873, ENSG00000125812, ENSG00000145147, ENSG00000185008, ENSG00000114315, ENSG0000…	694	267	16792	2.71865	0.0119871	0.000117076	0.00392177
GOTERM_BP_ALL	GO:0009893~positive regulation of metabolic process	175	20.4201	2.06906e-06	ENSG00000138449, ENSG00000131759, ENSG00000126070, ENSG00000179833, ENSG00000154310, ENSG00000169946, ENSG00000105976, ENSG00000197461, ENSG00000080503, ENSG00000087074, ENSG00000160310, ENSG00000114166, ENSG00000176909, ENSG00000171223, ENSG00000126778, ENSG00000173039, ENSG00000181085, ENSG00000124782, ENSG00000064655, ENSG00000170962, ENSG00000078699, ENSG00000204217, ENSG00000118495, ENSG0000…	694	3052	16792	1.38738	0.0122559	0.000118566	0.00401027
GOTERM_BP_ALL	GO:0072001~renal system development	31	3.61727	2.23869e-06	ENSG00000131759, ENSG00000168769, ENSG00000166949, ENSG00000197461, ENSG00000117707, ENSG00000154734, ENSG00000092969, ENSG00000126778, ENSG00000197603, ENSG00000112837, ENSG00000172037, ENSG00000170962, ENSG00000129757, ENSG00000150347, ENSG00000171016, ENSG00000120693, ENSG00000120738, ENSG00000125931, ENSG00000183691, ENSG00000170873, ENSG00000125812, ENSG00000145147, ENSG00000185008, ENSG0000…	694	283	16792	2.65044	0.013254	0.000127064	0.00433903
GOTERM_BP_ALL	GO:0032989~cellular component morphogenesis	90	10.5018	2.51038e-06	ENSG00000023902, ENSG00000154310, ENSG00000105976, ENSG00000138696, ENSG00000067208, ENSG00000196569, ENSG00000183688, ENSG00000172037, ENSG00000109680, ENSG00000179542, ENSG00000158079, ENSG00000124782, ENSG00000204217, ENSG00000165379, ENSG00000147862, ENSG00000127418, ENSG00000169221, ENSG00000099864, ENSG00000115935, ENSG00000182636, ENSG00000163513, ENSG00000176438, ENSG00000140937, ENSG0000…	694	1321	16792	1.64848	0.0148505	0.00014114	0.0048656
GOTERM_BP_ALL	GO:0001655~urogenital system development	33	3.85064	3.63481e-06	ENSG00000131759, ENSG00000168769, ENSG00000166949, ENSG00000197461, ENSG00000117707, ENSG00000154734, ENSG00000092969, ENSG00000126778, ENSG00000197603, ENSG00000112837, ENSG00000172037, ENSG00000170962, ENSG00000129757, ENSG00000150347, ENSG00000171016, ENSG00000120693, ENSG00000120738, ENSG00000041982, ENSG00000125931, ENSG00000183691, ENSG00000170873, ENSG00000125812, ENSG00000145147, ENSG0000…	694	320	16792	2.49521	0.0214306	0.000202442	0.0070449
GOTERM_BP_ALL	GO:0007167~enzyme linked receptor protein signaling pathway	70	8.16803	3.6409e-06	ENSG00000174136, ENSG00000105976, ENSG00000138696, ENSG00000197461, ENSG00000173039, ENSG00000113441, ENSG00000196814, ENSG00000170962, ENSG00000204217, ENSG00000127418, ENSG00000076641, ENSG00000150347, ENSG00000182636, ENSG00000163513, ENSG00000005882, ENSG00000145675, ENSG00000183691, ENSG00000147081, ENSG00000130787, ENSG00000044524, ENSG00000039319, ENSG00000114315, ENSG00000121879, ENSG0000…	694	954	16792	1.77539	0.0214661	0.000200904	0.0070567
GOTERM_BP_ALL	GO:0022604~regulation of cell morphogenesis	48	5.60093	4.70436e-06	ENSG00000142459, ENSG00000153707, ENSG00000023902, ENSG00000154310, ENSG00000169762, ENSG00000102606, ENSG00000166949, ENSG00000067208, ENSG00000092969, ENSG00000109680, ENSG00000099260, ENSG00000075223, ENSG00000076356, ENSG00000124782, ENSG00000181754, ENSG00000204217, ENSG00000169221, ENSG00000099864, ENSG00000115935, ENSG00000125931, ENSG00000122694, ENSG00000176438, ENSG00000163513, ENSG0000…	694	568	16792	2.04473	0.0276486	0.000257197	0.00911778
GOTERM_BP_ALL	GO:0046483~heterocycle metabolic process	301	35.1225	4.72962e-06	ENSG00000131759, ENSG00000126070, ENSG00000169946, ENSG00000113448, ENSG00000197461, ENSG00000113240, ENSG00000087074, ENSG00000171223, ENSG00000114166, ENSG00000126778, ENSG00000166439, ENSG00000181085, ENSG00000204524, ENSG00000078699, ENSG00000118495, ENSG00000134030, ENSG00000141644, ENSG00000136870, ENSG00000116539, ENSG00000175395, ENSG00000214872, ENSG00000144026, ENSG00000168283, ENSG0000…	694	5919	16792	1.23044	0.027795	0.000256227	0.00916674
GOTERM_BP_ALL	GO:0010634~positive regulation of epithelial cell migration	17	1.98366	6.06898e-06	ENSG00000122694, ENSG00000163513, ENSG00000168874, ENSG00000105976, ENSG00000074054, ENSG00000117707, ENSG00000100034, ENSG00000143878, ENSG00000106211, ENSG00000092969, ENSG00000131375, ENSG00000094631, ENSG00000114861, ENSG00000124782, ENSG00000142208, ENSG00000204217, ENSG00000070193	694	105	16792	3.91744	0.0355248	0.000325814	0.0117625
GOTERM_BP_ALL	GO:0043170~macromolecule metabolic process	434	50.6418	6.3042e-06	ENSG00000131759, ENSG00000126070, ENSG00000169946, ENSG00000183496, ENSG00000078142, ENSG00000113448, ENSG00000113240, ENSG00000185019, ENSG00000103227, ENSG00000087074, ENSG00000171223, ENSG00000166439, ENSG00000126778, ENSG00000113441, ENSG00000181085, ENSG00000204524, ENSG00000136878, ENSG00000196998, ENSG00000118495, ENSG00000141644, ENSG00000136870, ENSG00000116539, ENSG00000144026, ENSG0000…	694	9130	16792	1.15017	0.0368761	0.000335419	0.0122184
GOTERM_BP_ALL	GO:0051239~regulation of multicellular organismal process	154	17.9697	6.50186e-06	ENSG00000131759, ENSG00000204498, ENSG00000154310, ENSG00000169946, ENSG00000105976, ENSG00000113448, ENSG00000197461, ENSG00000121297, ENSG00000107130, ENSG00000126778, ENSG00000183688, ENSG00000112837, ENSG00000173039, ENSG00000179542, ENSG00000131375, ENSG00000124782, ENSG00000170962, ENSG00000078699, ENSG00000204217, ENSG00000141644, ENSG00000118689, ENSG00000214872, ENSG00000121210, ENSG0000…	694	2659	16792	1.40135	0.03801	0.000342872	0.0126014
GOTERM_BP_ALL	GO:0009790~embryo development	69	8.05134	7.0226e-06	ENSG00000131759, ENSG00000169946, ENSG00000197461, ENSG00000171223, ENSG00000126778, ENSG00000112837, ENSG00000078246, ENSG00000064655, ENSG00000204217, ENSG00000078399, ENSG00000005102, ENSG00000163513, ENSG00000183691, ENSG00000111799, ENSG00000114315, ENSG00000253293, ENSG00000128709, ENSG00000116809, ENSG00000142208, ENSG00000104331, ENSG00000137764, ENSG00000070193, ENSG00000144824, ENSG0000…	694	954	16792	1.75002	0.040991	0.00036708	0.0136106
GOTERM_BP_ALL	GO:0048736~appendage development	22	2.56709	7.19082e-06	ENSG00000056586, ENSG00000131759, ENSG00000144320, ENSG00000138696, ENSG00000183691, ENSG00000253293, ENSG00000164093, ENSG00000092969, ENSG00000128709, ENSG00000197603, ENSG00000076356, ENSG00000075223, ENSG00000078246, ENSG00000204217, ENSG00000078399, ENSG00000162337, ENSG00000139219, ENSG00000104331, ENSG00000102678, ENSG00000070193, ENSG00000141622, ENSG00000171310	694	170	16792	3.13124	0.0419521	0.000372604	0.0139366
GOTERM_BP_ALL	GO:0060173~limb development	22	2.56709	7.19082e-06	ENSG00000056586, ENSG00000131759, ENSG00000144320, ENSG00000138696, ENSG00000183691, ENSG00000253293, ENSG00000164093, ENSG00000092969, ENSG00000128709, ENSG00000197603, ENSG00000076356, ENSG00000075223, ENSG00000078246, ENSG00000204217, ENSG00000078399, ENSG00000162337, ENSG00000139219, ENSG00000104331, ENSG00000102678, ENSG00000070193, ENSG00000141622, ENSG00000171310	694	170	16792	3.13124	0.0419521	0.000372604	0.0139366
GOTERM_BP_ALL	GO:0022603~regulation of anatomical structure morphogenesis	74	8.63477	8.07907e-06	ENSG00000023902, ENSG00000154310, ENSG00000197461, ENSG00000067208, ENSG00000126778, ENSG00000112837, ENSG00000109680, ENSG00000124782, ENSG00000204217, ENSG00000133121, ENSG00000147862, ENSG00000169221, ENSG00000099864, ENSG00000115935, ENSG00000163513, ENSG00000176438, ENSG00000183691, ENSG00000197380, ENSG00000044524, ENSG00000145147, ENSG00000185008, ENSG00000114315, ENSG00000143878, ENSG0000…	694	1051	16792	1.70362	0.0470105	0.000415012	0.015658
GOTERM_BP_ALL	GO:0060411~cardiac septum morphogenesis	13	1.51692	8.56039e-06	ENSG00000163513, ENSG00000131759, ENSG00000169946, ENSG00000183691, ENSG00000204217, ENSG00000117707, ENSG00000157240, ENSG00000127418, ENSG00000197702, ENSG00000114315, ENSG00000164093, ENSG00000163909, ENSG00000092969	694	63	16792	4.99282	0.0497405	0.000435975	0.0165908
GOTERM_BP_ALL	GO:0010631~epithelial cell migration	26	3.03384	8.60465e-06	ENSG00000173482, ENSG00000105976, ENSG00000117707, ENSG00000100034, ENSG00000092969, ENSG00000114861, ENSG00000131375, ENSG00000124782, ENSG00000204217, ENSG00000179388, ENSG00000133121, ENSG00000169554, ENSG00000168874, ENSG00000163513, ENSG00000122694, ENSG00000123358, ENSG00000188613, ENSG00000074054, ENSG00000145147, ENSG00000143878, ENSG00000106211, ENSG00000121879, ENSG00000094631, ENSG0000…	694	228	16792	2.75919	0.0499911	0.000434515	0.0166766
GOTERM_BP_ALL	GO:0048646~anatomical structure formation involved in morphogenesis	79	9.2182	9.27427e-06	ENSG00000138449, ENSG00000131759, ENSG00000023902, ENSG00000197461, ENSG00000105204, ENSG00000171223, ENSG00000126778, ENSG00000078246, ENSG00000064655, ENSG00000179388, ENSG00000204217, ENSG00000133121, ENSG00000147862, ENSG00000005102, ENSG00000163513, ENSG00000183691, ENSG00000147081, ENSG00000122877, ENSG00000145147, ENSG00000111799, ENSG00000114315, ENSG00000143878, ENSG00000163909, ENSG0000…	694	1151	16792	1.66071	0.053775	0.000464387	0.0179742
GOTERM_BP_ALL	GO:1901360~organic cyclic compound metabolic process	309	36.056	9.40264e-06	ENSG00000131759, ENSG00000126070, ENSG00000169946, ENSG00000113448, ENSG00000197461, ENSG00000113240, ENSG00000103227, ENSG00000087074, ENSG00000171223, ENSG00000114166, ENSG00000126778, ENSG00000166439, ENSG00000181085, ENSG00000204524, ENSG00000078699, ENSG00000118495, ENSG00000134030, ENSG00000141644, ENSG00000136870, ENSG00000175395, ENSG00000116539, ENSG00000214872, ENSG00000144026, ENSG0000…	694	6149	16792	1.2159	0.0544987	0.000466891	0.018223
GOTERM_BP_ALL	GO:0044707~single-multicellular organism process	300	35.0058	1.00223e-05	ENSG00000131759, ENSG00000107821, ENSG00000169946, ENSG00000154310, ENSG00000113448, ENSG00000197461, ENSG00000103227, ENSG00000067208, ENSG00000107130, ENSG00000171223, ENSG00000183688, ENSG00000126778, ENSG00000121957, ENSG00000131375, ENSG00000078699, ENSG00000118495, ENSG00000141644, ENSG00000116539, ENSG00000214872, ENSG00000121210, ENSG00000168283, ENSG00000145675, ENSG00000183691, ENSG0000…	694	5943	16792	1.2214	0.057984	0.000493539	0.0194238
GOTERM_BP_ALL	GO:0090132~epithelium migration	26	3.03384	1.08143e-05	ENSG00000173482, ENSG00000105976, ENSG00000117707, ENSG00000100034, ENSG00000092969, ENSG00000114861, ENSG00000131375, ENSG00000124782, ENSG00000204217, ENSG00000179388, ENSG00000133121, ENSG00000169554, ENSG00000168874, ENSG00000163513, ENSG00000122694, ENSG00000123358, ENSG00000188613, ENSG00000074054, ENSG00000145147, ENSG00000143878, ENSG00000106211, ENSG00000121879, ENSG00000094631, ENSG0000…	694	231	16792	2.72336	0.0624206	0.00052817	0.0209587
GOTERM_BP_ALL	GO:0048519~negative regulation of biological process	242	28.238	1.20419e-05	ENSG00000131759, ENSG00000126070, ENSG00000169946, ENSG00000113448, ENSG00000197461, ENSG00000087074, ENSG00000171223, ENSG00000114166, ENSG00000183688, ENSG00000126778, ENSG00000166439, ENSG00000078699, ENSG00000118495, ENSG00000141644, ENSG00000076641, ENSG00000136870, ENSG00000116539, ENSG00000214872, ENSG00000121210, ENSG00000168283, ENSG00000145675, ENSG00000183691, ENSG00000164938, ENSG0000…	694	4623	16792	1.26659	0.0692554	0.000583328	0.0233376
GOTERM_BP_ALL	GO:0050767~regulation of neurogenesis	53	6.18436	1.48706e-05	ENSG00000153707, ENSG00000131759, ENSG00000084676, ENSG00000154310, ENSG00000168172, ENSG00000117707, ENSG00000107130, ENSG00000184708, ENSG00000126778, ENSG00000148516, ENSG00000173039, ENSG00000075223, ENSG00000076356, ENSG00000181754, ENSG00000078699, ENSG00000204217, ENSG00000026025, ENSG00000118689, ENSG00000141644, ENSG00000099864, ENSG00000130449, ENSG00000140262, ENSG00000174405, ENSG0000…	694	682	16792	1.88033	0.0848154	0.000714498	0.0288189
GOTERM_BP_ALL	GO:0090130~tissue migration	26	3.03384	1.68552e-05	ENSG00000173482, ENSG00000105976, ENSG00000117707, ENSG00000100034, ENSG00000092969, ENSG00000114861, ENSG00000131375, ENSG00000124782, ENSG00000204217, ENSG00000179388, ENSG00000133121, ENSG00000169554, ENSG00000168874, ENSG00000163513, ENSG00000122694, ENSG00000123358, ENSG00000188613, ENSG00000074054, ENSG00000145147, ENSG00000143878, ENSG00000106211, ENSG00000121879, ENSG00000094631, ENSG0000…	694	237	16792	2.65441	0.0955765	0.000803338	0.0326643
GOTERM_BP_ALL	GO:0048518~positive regulation of biological process	270	31.5053	1.72961e-05	ENSG00000131759, ENSG00000126070, ENSG00000169946, ENSG00000154310, ENSG00000078142, ENSG00000084636, ENSG00000113448, ENSG00000197461, ENSG00000087074, ENSG00000107130, ENSG00000171223, ENSG00000114166, ENSG00000126778, ENSG00000181085, ENSG00000131375, ENSG00000078699, ENSG00000118495, ENSG00000076641, ENSG00000116539, ENSG00000214872, ENSG00000147145, ENSG00000168283, ENSG00000145675, ENSG0000…	694	5285	16792	1.23612	0.0979504	0.000817806	0.0335187
GOTERM_BP_ALL	GO:0070848~response to growth factor	50	5.83431	1.84359e-05	ENSG00000174136, ENSG00000138696, ENSG00000166949, ENSG00000121989, ENSG00000157240, ENSG00000143437, ENSG00000092969, ENSG00000160888, ENSG00000151422, ENSG00000173039, ENSG00000148516, ENSG00000242265, ENSG00000170962, ENSG00000129757, ENSG00000179388, ENSG00000204217, ENSG00000127418, ENSG00000089177, ENSG00000118689, ENSG00000102678, ENSG00000141622, ENSG00000120693, ENSG00000041982, ENSG0000…	694	634	16792	1.9082	0.104057	0.000864814	0.0357271
GOTERM_BP_ALL	GO:0048667~cell morphogenesis involved in neuron differentiation	42	4.90082	1.93712e-05	ENSG00000153707, ENSG00000173482, ENSG00000138696, ENSG00000196569, ENSG00000092969, ENSG00000172037, ENSG00000076356, ENSG00000075223, ENSG00000114861, ENSG00000179542, ENSG00000138802, ENSG00000181754, ENSG00000204217, ENSG00000165379, ENSG00000147862, ENSG00000141622, ENSG00000063660, ENSG00000182636, ENSG00000140937, ENSG00000176749, ENSG00000183691, ENSG00000124006, ENSG00000103319, ENSG0000…	694	496	16792	2.04885	0.109038	0.000901573	0.0375393
GOTERM_BP_ALL	GO:0035239~tube morphogenesis	33	3.85064	2.04068e-05	ENSG00000131759, ENSG00000105976, ENSG00000166949, ENSG00000157240, ENSG00000092969, ENSG00000126778, ENSG00000148516, ENSG00000138802, ENSG00000078246, ENSG00000133121, ENSG00000147862, ENSG00000162337, ENSG00000041982, ENSG00000125931, ENSG00000168874, ENSG00000163513, ENSG00000183691, ENSG00000170873, ENSG00000125812, ENSG00000145147, ENSG00000114315, ENSG00000143878, ENSG00000005513, ENSG0000…	694	348	16792	2.29444	0.11452	0.000942389	0.0395458
GOTERM_BP_ALL	GO:0010632~regulation of epithelial cell migration	21	2.45041	2.23499e-05	ENSG00000122694, ENSG00000173482, ENSG00000163513, ENSG00000168874, ENSG00000105976, ENSG00000074054, ENSG00000117707, ENSG00000145147, ENSG00000100034, ENSG00000143878, ENSG00000106211, ENSG00000092969, ENSG00000131375, ENSG00000094631, ENSG00000114861, ENSG00000124782, ENSG00000142208, ENSG00000204217, ENSG00000133121, ENSG00000137764, ENSG00000070193	694	169	16792	3.0066	0.124716	0.00102414	0.0433105
GOTERM_BP_ALL	GO:0051216~cartilage development	22	2.56709	2.24828e-05	ENSG00000131759, ENSG00000163513, ENSG00000144320, ENSG00000138696, ENSG00000169762, ENSG00000183691, ENSG00000166949, ENSG00000092969, ENSG00000120451, ENSG00000183688, ENSG00000178882, ENSG00000173039, ENSG00000148516, ENSG00000165240, ENSG00000204217, ENSG00000147862, ENSG00000139219, ENSG00000104331, ENSG00000102678, ENSG00000120693, ENSG00000043039, ENSG00000171310	694	183	16792	2.9088	0.125409	0.00102237	0.0435681
GOTERM_BP_ALL	GO:0048598~embryonic morphogenesis	46	5.36756	2.52229e-05	ENSG00000131759, ENSG00000084676, ENSG00000166949, ENSG00000121989, ENSG00000117707, ENSG00000157240, ENSG00000092969, ENSG00000126778, ENSG00000197603, ENSG00000148516, ENSG00000138802, ENSG00000078246, ENSG00000064655, ENSG00000129757, ENSG00000204217, ENSG00000078399, ENSG00000162337, ENSG00000089177, ENSG00000102678, ENSG00000168874, ENSG00000163513, ENSG00000144320, ENSG00000183691, ENSG0000…	694	571	16792	1.94924	0.139576	0.00113822	0.0488767
GOTERM_BP_ALL	GO:0051094~positive regulation of developmental process	74	8.63477	2.66335e-05	ENSG00000131759, ENSG00000169946, ENSG00000138696, ENSG00000197461, ENSG00000198563, ENSG00000176909, ENSG00000126778, ENSG00000173039, ENSG00000179542, ENSG00000124782, ENSG00000170962, ENSG00000078699, ENSG00000179388, ENSG00000204217, ENSG00000118689, ENSG00000099864, ENSG00000163513, ENSG00000183691, ENSG00000044524, ENSG00000145147, ENSG00000185008, ENSG00000150471, ENSG00000114315, ENSG0000…	694	1089	16792	1.64417	0.14678	0.00119281	0.0516096
GOTERM_BP_ALL	GO:0043009~chordate embryonic development	46	5.36756	3.26185e-05	ENSG00000131759, ENSG00000084676, ENSG00000169946, ENSG00000169762, ENSG00000166949, ENSG00000117707, ENSG00000121989, ENSG00000157240, ENSG00000143437, ENSG00000171223, ENSG00000092969, ENSG00000126778, ENSG00000148516, ENSG00000075223, ENSG00000076356, ENSG00000138802, ENSG00000114861, ENSG00000123572, ENSG00000078246, ENSG00000129757, ENSG00000204217, ENSG00000078399, ENSG00000102678, ENSG0000…	694	577	16792	1.92897	0.176679	0.00144976	0.0632035
GOTERM_BP_ALL	GO:0045664~regulation of neuron differentiation	45	5.25088	3.33024e-05	ENSG00000131759, ENSG00000153707, ENSG00000084676, ENSG00000154310, ENSG00000117707, ENSG00000107130, ENSG00000184708, ENSG00000126778, ENSG00000148516, ENSG00000075223, ENSG00000076356, ENSG00000181754, ENSG00000078699, ENSG00000204217, ENSG00000026025, ENSG00000118689, ENSG00000099864, ENSG00000140262, ENSG00000176749, ENSG00000124006, ENSG00000103319, ENSG00000044524, ENSG00000145147, ENSG0000…	694	560	16792	1.94432	0.180028	0.00146918	0.0645282
GOTERM_BP_ALL	GO:0003279~cardiac septum development	15	1.75029	3.79883e-05	ENSG00000131759, ENSG00000163513, ENSG00000169946, ENSG00000183691, ENSG00000117707, ENSG00000157240, ENSG00000114315, ENSG00000164093, ENSG00000092969, ENSG00000163909, ENSG00000197603, ENSG00000113971, ENSG00000204217, ENSG00000127418, ENSG00000197702	694	96	16792	3.78062	0.202612	0.00166343	0.0736047
GOTERM_BP_ALL	GO:0035107~appendage morphogenesis	19	2.21704	3.94049e-05	ENSG00000144320, ENSG00000138696, ENSG00000183691, ENSG00000253293, ENSG00000164093, ENSG00000092969, ENSG00000128709, ENSG00000197603, ENSG00000075223, ENSG00000076356, ENSG00000078246, ENSG00000078399, ENSG00000162337, ENSG00000139219, ENSG00000104331, ENSG00000102678, ENSG00000070193, ENSG00000141622, ENSG00000171310	694	148	16792	3.10624	0.209317	0.00171282	0.0763484
GOTERM_BP_ALL	GO:0035108~limb morphogenesis	19	2.21704	3.94049e-05	ENSG00000144320, ENSG00000138696, ENSG00000183691, ENSG00000253293, ENSG00000164093, ENSG00000092969, ENSG00000128709, ENSG00000197603, ENSG00000075223, ENSG00000076356, ENSG00000078246, ENSG00000078399, ENSG00000162337, ENSG00000139219, ENSG00000104331, ENSG00000102678, ENSG00000070193, ENSG00000141622, ENSG00000171310	694	148	16792	3.10624	0.209317	0.00171282	0.0763484
GOTERM_BP_ALL	GO:0031324~negative regulation of cellular metabolic process	135	15.7526	4.02535e-05	ENSG00000131759, ENSG00000126070, ENSG00000257315, ENSG00000169946, ENSG00000113448, ENSG00000197461, ENSG00000080503, ENSG00000087074, ENSG00000121297, ENSG00000160310, ENSG00000114166, ENSG00000171223, ENSG00000166439, ENSG00000126778, ENSG00000112837, ENSG00000173039, ENSG00000124782, ENSG00000078699, ENSG00000204217, ENSG00000141644, ENSG00000118689, ENSG00000136870, ENSG00000116539, ENSG0000…	694	2345	16792	1.39294	0.213306	0.00173701	0.077992
GOTERM_BP_ALL	GO:0009792~embryo development ending in birth or egg hatching	46	5.36756	4.095e-05	ENSG00000131759, ENSG00000084676, ENSG00000169946, ENSG00000169762, ENSG00000166949, ENSG00000117707, ENSG00000121989, ENSG00000157240, ENSG00000143437, ENSG00000171223, ENSG00000092969, ENSG00000126778, ENSG00000148516, ENSG00000075223, ENSG00000076356, ENSG00000138802, ENSG00000114861, ENSG00000123572, ENSG00000078246, ENSG00000129757, ENSG00000204217, ENSG00000078399, ENSG00000102678, ENSG0000…	694	583	16792	1.90912	0.216565	0.00175434	0.079341
GOTERM_BP_ALL	GO:0042692~muscle cell differentiation	33	3.85064	4.42818e-05	ENSG00000131759, ENSG00000023902, ENSG00000131018, ENSG00000117707, ENSG00000105204, ENSG00000198563, ENSG00000176909, ENSG00000145824, ENSG00000126778, ENSG00000148516, ENSG00000129910, ENSG00000114861, ENSG00000219626, ENSG00000129152, ENSG00000043039, ENSG00000112531, ENSG00000124006, ENSG00000114315, ENSG00000145349, ENSG00000120616, ENSG00000005513, ENSG00000145794, ENSG00000164093, ENSG0000…	694	362	16792	2.20571	0.231969	0.00188341	0.0857938
GOTERM_BP_ALL	GO:0045597~positive regulation of cell differentiation	60	7.00117	4.65051e-05	ENSG00000131759, ENSG00000138696, ENSG00000163638, ENSG00000198563, ENSG00000171223, ENSG00000176909, ENSG00000173039, ENSG00000124782, ENSG00000078699, ENSG00000204217, ENSG00000179388, ENSG00000118689, ENSG00000099864, ENSG00000163513, ENSG00000044524, ENSG00000145147, ENSG00000185008, ENSG00000114315, ENSG00000163909, ENSG00000010810, ENSG00000049759, ENSG00000142208, ENSG00000082014, ENSG0000…	694	841	16792	1.72623	0.24208	0.00196386	0.0900995
GOTERM_BP_ALL	GO:0003281~ventricular septum development	12	1.40023	4.74389e-05	ENSG00000163513, ENSG00000169946, ENSG00000183691, ENSG00000204217, ENSG00000117707, ENSG00000157240, ENSG00000127418, ENSG00000114315, ENSG00000164093, ENSG00000163909, ENSG00000092969, ENSG00000197603	694	63	16792	4.60876	0.246286	0.00198916	0.0919079
GOTERM_BP_ALL	GO:0060037~pharyngeal system development	8	0.933489	4.95825e-05	ENSG00000076356, ENSG00000183691, ENSG00000204217, ENSG00000100625, ENSG00000104313, ENSG00000114315, ENSG00000092969, ENSG00000126778	694	25	16792	7.74271	0.255855	0.00206443	0.0960589
GOTERM_BP_ALL	GO:0097192~extrinsic apoptotic signaling pathway in absence of ligand	13	1.51692	5.33003e-05	ENSG00000010810, ENSG00000064655, ENSG00000165943, ENSG00000135439, ENSG00000142208, ENSG00000065361, ENSG00000112319, ENSG00000104313, ENSG00000139219, ENSG00000118689, ENSG00000137764, ENSG00000070193, ENSG00000092969	694	75	16792	4.19397	0.272163	0.00220367	0.103258
GOTERM_BP_ALL	GO:0038034~signal transduction in absence of ligand	13	1.51692	5.33003e-05	ENSG00000010810, ENSG00000064655, ENSG00000165943, ENSG00000135439, ENSG00000142208, ENSG00000065361, ENSG00000112319, ENSG00000104313, ENSG00000139219, ENSG00000118689, ENSG00000137764, ENSG00000070193, ENSG00000092969	694	75	16792	4.19397	0.272163	0.00220367	0.103258
GOTERM_BP_ALL	GO:0048705~skeletal system morphogenesis	23	2.68378	6.35266e-05	ENSG00000131759, ENSG00000163513, ENSG00000175879, ENSG00000138696, ENSG00000183691, ENSG00000166949, ENSG00000122592, ENSG00000092969, ENSG00000126778, ENSG00000183688, ENSG00000128709, ENSG00000178882, ENSG00000148516, ENSG00000078246, ENSG00000204217, ENSG00000100625, ENSG00000162337, ENSG00000104313, ENSG00000139219, ENSG00000104331, ENSG00000150347, ENSG00000043039, ENSG00000171310	694	211	16792	2.63747	0.315201	0.00260784	0.123058
GOTERM_BP_ALL	GO:0044249~cellular biosynthetic process	302	35.2392	6.38355e-05	ENSG00000131759, ENSG00000126070, ENSG00000169946, ENSG00000078142, ENSG00000197461, ENSG00000103227, ENSG00000087074, ENSG00000171223, ENSG00000114166, ENSG00000126778, ENSG00000181085, ENSG00000204524, ENSG00000078699, ENSG00000196998, ENSG00000118495, ENSG00000134030, ENSG00000141644, ENSG00000136870, ENSG00000175395, ENSG00000116539, ENSG00000214872, ENSG00000144026, ENSG00000168283, ENSG0000…	694	6118	16792	1.19437	0.316461	0.00260258	0.123656
GOTERM_BP_ALL	GO:0010605~negative regulation of macromolecule metabolic process	133	15.5193	6.39038e-05	ENSG00000131759, ENSG00000126070, ENSG00000257315, ENSG00000169946, ENSG00000113448, ENSG00000080503, ENSG00000087074, ENSG00000121297, ENSG00000160310, ENSG00000114166, ENSG00000171223, ENSG00000166439, ENSG00000126778, ENSG00000112837, ENSG00000173039, ENSG00000124782, ENSG00000078699, ENSG00000204217, ENSG00000141644, ENSG00000118689, ENSG00000136870, ENSG00000116539, ENSG00000214872, ENSG0000…	694	2326	16792	1.38352	0.316739	0.00258766	0.123788
GOTERM_BP_ALL	GO:0048858~cell projection morphogenesis	57	6.65111	6.94779e-05	ENSG00000023902, ENSG00000138696, ENSG00000196569, ENSG00000172037, ENSG00000179542, ENSG00000158079, ENSG00000124782, ENSG00000204217, ENSG00000165379, ENSG00000147862, ENSG00000182636, ENSG00000140937, ENSG00000183691, ENSG00000147081, ENSG00000122877, ENSG00000145147, ENSG00000185008, ENSG00000010810, ENSG00000138814, ENSG00000049759, ENSG00000127152, ENSG00000197702, ENSG00000128881, ENSG0000…	694	797	16792	1.73045	0.339067	0.00279408	0.134579
GOTERM_BP_ALL	GO:0048732~gland development	36	4.2007	6.99883e-05	ENSG00000131759, ENSG00000084676, ENSG00000168769, ENSG00000166949, ENSG00000197461, ENSG00000117707, ENSG00000198563, ENSG00000092969, ENSG00000126778, ENSG00000173039, ENSG00000075223, ENSG00000124782, ENSG00000129757, ENSG00000078399, ENSG00000147862, ENSG00000162337, ENSG00000150347, ENSG00000096968, ENSG00000041982, ENSG00000163513, ENSG00000183691, ENSG00000114315, ENSG00000121879, ENSG0000…	694	421	16792	2.06901	0.341074	0.00279571	0.135567
GOTERM_BP_ALL	GO:0030030~cell projection organization	83	9.68495	7.29478e-05	ENSG00000023902, ENSG00000154310, ENSG00000138696, ENSG00000197461, ENSG00000067208, ENSG00000107130, ENSG00000196569, ENSG00000172037, ENSG00000109680, ENSG00000179542, ENSG00000158079, ENSG00000124782, ENSG00000078699, ENSG00000204217, ENSG00000165379, ENSG00000147862, ENSG00000169221, ENSG00000099864, ENSG00000182636, ENSG00000140937, ENSG00000183691, ENSG00000147081, ENSG00000122877, ENSG0000…	694	1301	16792	1.54363	0.352596	0.00289437	0.141296
GOTERM_BP_ALL	GO:0016477~cell migration	77	8.98483	7.40751e-05	ENSG00000023902, ENSG00000105976, ENSG00000107862, ENSG00000113448, ENSG00000198420, ENSG00000197461, ENSG00000100034, ENSG00000145824, ENSG00000126778, ENSG00000131375, ENSG00000124782, ENSG00000170962, ENSG00000179388, ENSG00000204217, ENSG00000133121, ENSG00000150347, ENSG00000182636, ENSG00000163513, ENSG00000145675, ENSG00000183691, ENSG00000044524, ENSG00000145147, ENSG00000164938, ENSG0000…	694	1184	16792	1.57356	0.356931	0.0029196	0.143478
GOTERM_BP_ALL	GO:0010769~regulation of cell morphogenesis involved in differentiation	31	3.61727	7.45694e-05	ENSG00000153707, ENSG00000154310, ENSG00000102606, ENSG00000166949, ENSG00000092969, ENSG00000076356, ENSG00000075223, ENSG00000124782, ENSG00000181754, ENSG00000204217, ENSG00000163513, ENSG00000122694, ENSG00000125931, ENSG00000176749, ENSG00000183691, ENSG00000197380, ENSG00000124006, ENSG00000103319, ENSG00000074054, ENSG00000044524, ENSG00000145147, ENSG00000185008, ENSG00000196576, ENSG0000…	694	339	16792	2.21261	0.358823	0.00291974	0.144434
GOTERM_BP_ALL	GO:1901576~organic substance biosynthetic process	306	35.706	7.8449e-05	ENSG00000131759, ENSG00000126070, ENSG00000169946, ENSG00000078142, ENSG00000197461, ENSG00000103227, ENSG00000087074, ENSG00000171223, ENSG00000114166, ENSG00000126778, ENSG00000181085, ENSG00000204524, ENSG00000078699, ENSG00000196998, ENSG00000118495, ENSG00000134030, ENSG00000141644, ENSG00000136870, ENSG00000175395, ENSG00000116539, ENSG00000214872, ENSG00000144026, ENSG00000168283, ENSG0000…	694	6227	16792	1.18901	0.37348	0.00305138	0.151943
GOTERM_BP_ALL	GO:0043087~regulation of GTPase activity	51	5.95099	8.23315e-05	ENSG00000084070, ENSG00000107862, ENSG00000197461, ENSG00000067208, ENSG00000139436, ENSG00000109680, ENSG00000006607, ENSG00000163947, ENSG00000133121, ENSG00000169221, ENSG00000196914, ENSG00000174373, ENSG00000044524, ENSG00000145147, ENSG00000165092, ENSG00000145349, ENSG00000010810, ENSG00000107021, ENSG00000116584, ENSG00000160867, ENSG00000100485, ENSG00000133612, ENSG00000070193, ENSG0000…	694	691	16792	1.78581	0.387812	0.0031814	0.159457
GOTERM_BP_ALL	GO:0001823~mesonephros development	15	1.75029	8.37406e-05	ENSG00000131759, ENSG00000125931, ENSG00000183691, ENSG00000125812, ENSG00000166949, ENSG00000145147, ENSG00000185008, ENSG00000114315, ENSG00000005513, ENSG00000126778, ENSG00000100625, ENSG00000104313, ENSG00000070193, ENSG00000164056, ENSG00000120693	694	103	16792	3.52368	0.392932	0.00321492	0.162184
GOTERM_BP_ALL	GO:0048589~developmental growth	45	5.25088	8.37916e-05	ENSG00000056586, ENSG00000131759, ENSG00000169946, ENSG00000138696, ENSG00000113448, ENSG00000166949, ENSG00000117707, ENSG00000181744, ENSG00000198563, ENSG00000160310, ENSG00000092969, ENSG00000126778, ENSG00000130005, ENSG00000172037, ENSG00000030304, ENSG00000075223, ENSG00000076356, ENSG00000114861, ENSG00000123572, ENSG00000129757, ENSG00000204217, ENSG00000136936, ENSG00000118689, ENSG0000…	694	583	16792	1.86761	0.393117	0.00319628	0.162283
GOTERM_BP_ALL	GO:0051294~establishment of spindle orientation	8	0.933489	8.52298e-05	ENSG00000121957, ENSG00000116584, ENSG00000137497, ENSG00000047849, ENSG00000074054, ENSG00000104313, ENSG00000070193, ENSG00000164056	694	27	16792	7.16917	0.398297	0.00323038	0.165066
GOTERM_BP_ALL	GO:0034641~cellular nitrogen compound metabolic process	317	36.9895	0.000100983	ENSG00000131759, ENSG00000126070, ENSG00000169946, ENSG00000113448, ENSG00000197461, ENSG00000113240, ENSG00000087074, ENSG00000171223, ENSG00000114166, ENSG00000126778, ENSG00000166439, ENSG00000113441, ENSG00000181085, ENSG00000204524, ENSG00000078699, ENSG00000118495, ENSG00000134030, ENSG00000141644, ENSG00000136870, ENSG00000175395, ENSG00000116539, ENSG00000214872, ENSG00000144026, ENSG0000…	694	6505	16792	1.17911	0.452223	0.00380216	0.195547
GOTERM_BP_ALL	GO:0003206~cardiac chamber morphogenesis	16	1.86698	0.000102995	ENSG00000131759, ENSG00000163513, ENSG00000169946, ENSG00000183691, ENSG00000117707, ENSG00000157240, ENSG00000114315, ENSG00000164093, ENSG00000163909, ENSG00000154734, ENSG00000092969, ENSG00000075223, ENSG00000204217, ENSG00000082014, ENSG00000127418, ENSG00000197702	694	118	16792	3.28081	0.458754	0.00385345	0.19944
GOTERM_BP_ALL	GO:0007417~central nervous system development	62	7.23454	0.000105234	ENSG00000131759, ENSG00000168172, ENSG00000126778, ENSG00000172037, ENSG00000078246, ENSG00000204217, ENSG00000147862, ENSG00000141644, ENSG00000118689, ENSG00000163513, ENSG00000163848, ENSG00000182636, ENSG00000140937, ENSG00000183691, ENSG00000122877, ENSG00000145147, ENSG00000185008, ENSG00000114315, ENSG00000112294, ENSG00000010810, ENSG00000142208, ENSG00000127152, ENSG00000167720, ENSG0000…	694	904	16792	1.65946	0.465931	0.00391251	0.203772
GOTERM_BP_ALL	GO:2001240~negative regulation of extrinsic apoptotic signaling pathway in absence of ligand	9	1.05018	0.000107744	ENSG00000010810, ENSG00000064655, ENSG00000135439, ENSG00000142208, ENSG00000112319, ENSG00000104313, ENSG00000139219, ENSG00000137764, ENSG00000070193	694	37	16792	5.88551	0.473859	0.00398079	0.208626
GOTERM_BP_ALL	GO:1901099~negative regulation of signal transduction in absence of ligand	9	1.05018	0.000107744	ENSG00000010810, ENSG00000064655, ENSG00000135439, ENSG00000142208, ENSG00000112319, ENSG00000104313, ENSG00000139219, ENSG00000137764, ENSG00000070193	694	37	16792	5.88551	0.473859	0.00398079	0.208626
GOTERM_BP_ALL	GO:0072359~circulatory system development	64	7.46791	0.000111964	ENSG00000131759, ENSG00000169946, ENSG00000197461, ENSG00000198563, ENSG00000171223, ENSG00000126778, ENSG00000170962, ENSG00000179388, ENSG00000204217, ENSG00000133121, ENSG00000127418, ENSG00000141644, ENSG00000163513, ENSG00000183691, ENSG00000145147, ENSG00000116874, ENSG00000143878, ENSG00000145349, ENSG00000114315, ENSG00000120616, ENSG00000163909, ENSG00000121879, ENSG00000142208, ENSG0000…	694	945	16792	1.63867	0.486931	0.00411094	0.216791
GOTERM_BP_ALL	GO:0072358~cardiovascular system development	64	7.46791	0.000111964	ENSG00000131759, ENSG00000169946, ENSG00000197461, ENSG00000198563, ENSG00000171223, ENSG00000126778, ENSG00000170962, ENSG00000179388, ENSG00000204217, ENSG00000133121, ENSG00000127418, ENSG00000141644, ENSG00000163513, ENSG00000183691, ENSG00000145147, ENSG00000116874, ENSG00000143878, ENSG00000145349, ENSG00000114315, ENSG00000120616, ENSG00000163909, ENSG00000121879, ENSG00000142208, ENSG0000…	694	945	16792	1.63867	0.486931	0.00411094	0.216791
GOTERM_BP_ALL	GO:1901861~regulation of muscle tissue development	16	1.86698	0.00011345	ENSG00000163513, ENSG00000063660, ENSG00000169946, ENSG00000183691, ENSG00000166949, ENSG00000065361, ENSG00000198563, ENSG00000157514, ENSG00000145794, ENSG00000126778, ENSG00000114861, ENSG00000100625, ENSG00000102678, ENSG00000064309, ENSG00000129152, ENSG00000115461	694	119	16792	3.25324	0.491453	0.00413986	0.219663
GOTERM_BP_ALL	GO:0071363~cellular response to growth factor stimulus	46	5.36756	0.000120726	ENSG00000174136, ENSG00000138696, ENSG00000166949, ENSG00000121989, ENSG00000157240, ENSG00000143437, ENSG00000092969, ENSG00000173039, ENSG00000148516, ENSG00000242265, ENSG00000170962, ENSG00000129757, ENSG00000204217, ENSG00000179388, ENSG00000127418, ENSG00000089177, ENSG00000118689, ENSG00000102678, ENSG00000120693, ENSG00000141622, ENSG00000120738, ENSG00000063660, ENSG00000125931, ENSG0000…	694	610	16792	1.82461	0.51304	0.00437803	0.233737
GOTERM_BP_ALL	GO:0050678~regulation of epithelial cell proliferation	28	3.26721	0.000126621	ENSG00000173482, ENSG00000166949, ENSG00000117707, ENSG00000143437, ENSG00000092969, ENSG00000126778, ENSG00000101940, ENSG00000114861, ENSG00000124782, ENSG00000129757, ENSG00000204217, ENSG00000179388, ENSG00000147862, ENSG00000102678, ENSG00000168874, ENSG00000123358, ENSG00000183691, ENSG00000170873, ENSG00000173511, ENSG00000114315, ENSG00000135439, ENSG00000142208, ENSG00000127152, ENSG0000…	694	300	16792	2.25829	0.529854	0.00456357	0.245137
GOTERM_BP_ALL	GO:0001568~blood vessel development	44	5.13419	0.000131006	ENSG00000173482, ENSG00000169946, ENSG00000173546, ENSG00000197461, ENSG00000117707, ENSG00000171223, ENSG00000092969, ENSG00000126778, ENSG00000197603, ENSG00000075223, ENSG00000138802, ENSG00000170962, ENSG00000204217, ENSG00000179388, ENSG00000133121, ENSG00000162337, ENSG00000102678, ENSG00000120738, ENSG00000125931, ENSG00000163513, ENSG00000112531, ENSG00000123358, ENSG00000183691, ENSG0000…	694	576	16792	1.8483	0.541983	0.00469286	0.253616
GOTERM_BP_ALL	GO:0006928~movement of cell or subcellular component	106	12.3687	0.000132698	ENSG00000048471, ENSG00000105976, ENSG00000113448, ENSG00000197461, ENSG00000126778, ENSG00000172037, ENSG00000131375, ENSG00000124782, ENSG00000170962, ENSG00000204217, ENSG00000150347, ENSG00000163513, ENSG00000145675, ENSG00000183691, ENSG00000147081, ENSG00000044524, ENSG00000145147, ENSG00000185008, ENSG00000164938, ENSG00000145349, ENSG00000143878, ENSG00000152642, ENSG00000160867, ENSG0000…	694	1795	16792	1.42884	0.546578	0.00472492	0.256887
GOTERM_BP_ALL	GO:0032990~cell part morphogenesis	57	6.65111	0.00013415	ENSG00000023902, ENSG00000138696, ENSG00000196569, ENSG00000172037, ENSG00000179542, ENSG00000158079, ENSG00000124782, ENSG00000204217, ENSG00000165379, ENSG00000147862, ENSG00000182636, ENSG00000140937, ENSG00000183691, ENSG00000147081, ENSG00000122877, ENSG00000145147, ENSG00000185008, ENSG00000010810, ENSG00000138814, ENSG00000049759, ENSG00000127152, ENSG00000197702, ENSG00000128881, ENSG0000…	694	817	16792	1.68809	0.550485	0.00474813	0.259694
GOTERM_BP_ALL	GO:0051128~regulation of cellular component organization	131	15.2859	0.000135395	ENSG00000179833, ENSG00000107821, ENSG00000154310, ENSG00000084636, ENSG00000197461, ENSG00000080503, ENSG00000067208, ENSG00000107130, ENSG00000126778, ENSG00000179542, ENSG00000181085, ENSG00000124782, ENSG00000196526, ENSG00000078699, ENSG00000204217, ENSG00000141279, ENSG00000176438, ENSG00000163513, ENSG00000145675, ENSG00000183691, ENSG00000112659, ENSG00000073614, ENSG00000044524, ENSG0000…	694	2323	16792	1.36447	0.553809	0.00476381	0.262101
GOTERM_BP_ALL	GO:0007389~pattern specification process	36	4.2007	0.000139076	ENSG00000175879, ENSG00000138696, ENSG00000166949, ENSG00000121989, ENSG00000126778, ENSG00000112837, ENSG00000148516, ENSG00000159388, ENSG00000075223, ENSG00000076356, ENSG00000078246, ENSG00000204217, ENSG00000010803, ENSG00000078399, ENSG00000162337, ENSG00000005102, ENSG00000168283, ENSG00000125931, ENSG00000163513, ENSG00000183691, ENSG00000122877, ENSG00000122592, ENSG00000179981, ENSG0000…	694	436	16792	1.99783	0.563492	0.0048643	0.269218
GOTERM_BP_ALL	GO:0007411~axon guidance	23	2.68378	0.000143795	ENSG00000173482, ENSG00000063660, ENSG00000176749, ENSG00000138696, ENSG00000183691, ENSG00000122877, ENSG00000145147, ENSG00000185008, ENSG00000092969, ENSG00000196569, ENSG00000196576, ENSG00000172037, ENSG00000076356, ENSG00000075223, ENSG00000010810, ENSG00000114861, ENSG00000182580, ENSG00000127152, ENSG00000204217, ENSG00000147862, ENSG00000079482, ENSG00000138834, ENSG00000141622	694	223	16792	2.49555	0.575601	0.00499963	0.278342
GOTERM_BP_ALL	GO:0048812~neuron projection morphogenesis	42	4.90082	0.00014694	ENSG00000153707, ENSG00000173482, ENSG00000138696, ENSG00000196569, ENSG00000092969, ENSG00000172037, ENSG00000076356, ENSG00000075223, ENSG00000114861, ENSG00000179542, ENSG00000181754, ENSG00000204217, ENSG00000165379, ENSG00000147862, ENSG00000130449, ENSG00000141622, ENSG00000063660, ENSG00000182636, ENSG00000140937, ENSG00000176749, ENSG00000183691, ENSG00000124006, ENSG00000103319, ENSG0000…	694	543	16792	1.87151	0.583482	0.00507907	0.284421
GOTERM_BP_ALL	GO:0051240~positive regulation of multicellular organismal process	88	10.2684	0.000149303	ENSG00000131759, ENSG00000169946, ENSG00000138696, ENSG00000105976, ENSG00000113448, ENSG00000197461, ENSG00000100034, ENSG00000198563, ENSG00000126778, ENSG00000173039, ENSG00000179542, ENSG00000131375, ENSG00000124782, ENSG00000170962, ENSG00000078699, ENSG00000179388, ENSG00000204217, ENSG00000118689, ENSG00000099864, ENSG00000214872, ENSG00000163513, ENSG00000145675, ENSG00000183691, ENSG0000…	694	1431	16792	1.48794	0.589308	0.00513079	0.288988
GOTERM_BP_ALL	GO:0006464~cellular protein modification process	199	23.2205	0.000151093	ENSG00000131759, ENSG00000183496, ENSG00000154310, ENSG00000078142, ENSG00000113448, ENSG00000197461, ENSG00000113240, ENSG00000185019, ENSG00000103227, ENSG00000087074, ENSG00000114166, ENSG00000166439, ENSG00000113441, ENSG00000181085, ENSG00000127452, ENSG00000136878, ENSG00000196998, ENSG00000116539, ENSG00000214872, ENSG00000168283, ENSG00000170185, ENSG00000145675, ENSG00000183691, ENSG0000…	694	3818	16792	1.26113	0.593667	0.00516239	0.292448
GOTERM_BP_ALL	GO:0036211~protein modification process	199	23.2205	0.000151093	ENSG00000131759, ENSG00000183496, ENSG00000154310, ENSG00000078142, ENSG00000113448, ENSG00000197461, ENSG00000113240, ENSG00000185019, ENSG00000103227, ENSG00000087074, ENSG00000114166, ENSG00000166439, ENSG00000113441, ENSG00000181085, ENSG00000127452, ENSG00000136878, ENSG00000196998, ENSG00000116539, ENSG00000214872, ENSG00000168283, ENSG00000170185, ENSG00000145675, ENSG00000183691, ENSG0000…	694	3818	16792	1.26113	0.593667	0.00516239	0.292448
GOTERM_BP_ALL	GO:0097485~neuron projection guidance	23	2.68378	0.000153239	ENSG00000173482, ENSG00000063660, ENSG00000176749, ENSG00000138696, ENSG00000183691, ENSG00000122877, ENSG00000145147, ENSG00000185008, ENSG00000092969, ENSG00000196569, ENSG00000196576, ENSG00000172037, ENSG00000076356, ENSG00000075223, ENSG00000010810, ENSG00000114861, ENSG00000182580, ENSG00000127152, ENSG00000204217, ENSG00000147862, ENSG00000079482, ENSG00000138834, ENSG00000141622	694	224	16792	2.48441	0.598831	0.00520567	0.296595
GOTERM_BP_ALL	GO:0009892~negative regulation of metabolic process	140	16.3361	0.000155265	ENSG00000131759, ENSG00000126070, ENSG00000257315, ENSG00000169946, ENSG00000113448, ENSG00000197461, ENSG00000080503, ENSG00000087074, ENSG00000121297, ENSG00000160310, ENSG00000114166, ENSG00000171223, ENSG00000166439, ENSG00000126778, ENSG00000112837, ENSG00000173039, ENSG00000124782, ENSG00000078699, ENSG00000204217, ENSG00000141644, ENSG00000118689, ENSG00000136870, ENSG00000116539, ENSG0000…	694	2522	16792	1.34315	0.603649	0.00524446	0.300513
GOTERM_BP_ALL	GO:0048706~embryonic skeletal system development	16	1.86698	0.000165066	ENSG00000163513, ENSG00000169762, ENSG00000183691, ENSG00000166949, ENSG00000122592, ENSG00000121989, ENSG00000126778, ENSG00000128709, ENSG00000148516, ENSG00000078246, ENSG00000078399, ENSG00000100625, ENSG00000104313, ENSG00000139219, ENSG00000102678, ENSG00000171310	694	123	16792	3.14744	0.626141	0.0055432	0.319453
GOTERM_BP_ALL	GO:0001657~ureteric bud development	14	1.63361	0.000171997	ENSG00000131759, ENSG00000125931, ENSG00000183691, ENSG00000166949, ENSG00000125812, ENSG00000145147, ENSG00000185008, ENSG00000114315, ENSG00000005513, ENSG00000126778, ENSG00000100625, ENSG00000104313, ENSG00000164056, ENSG00000120693	694	97	16792	3.4922	0.641272	0.00574294	0.332845
GOTERM_BP_ALL	GO:0072164~mesonephric tubule development	14	1.63361	0.00019096	ENSG00000131759, ENSG00000125931, ENSG00000183691, ENSG00000166949, ENSG00000125812, ENSG00000145147, ENSG00000185008, ENSG00000114315, ENSG00000005513, ENSG00000126778, ENSG00000100625, ENSG00000104313, ENSG00000164056, ENSG00000120693	694	98	16792	3.45657	0.679615	0.00633866	0.369478
GOTERM_BP_ALL	GO:0072163~mesonephric epithelium development	14	1.63361	0.00019096	ENSG00000131759, ENSG00000125931, ENSG00000183691, ENSG00000166949, ENSG00000125812, ENSG00000145147, ENSG00000185008, ENSG00000114315, ENSG00000005513, ENSG00000126778, ENSG00000100625, ENSG00000104313, ENSG00000164056, ENSG00000120693	694	98	16792	3.45657	0.679615	0.00633866	0.369478
GOTERM_BP_ALL	GO:0009058~biosynthetic process	307	35.8226	0.000194646	ENSG00000131759, ENSG00000126070, ENSG00000169946, ENSG00000078142, ENSG00000197461, ENSG00000103227, ENSG00000087074, ENSG00000171223, ENSG00000114166, ENSG00000126778, ENSG00000181085, ENSG00000204524, ENSG00000078699, ENSG00000196998, ENSG00000118495, ENSG00000134030, ENSG00000141644, ENSG00000136870, ENSG00000175395, ENSG00000116539, ENSG00000214872, ENSG00000144026, ENSG00000168283, ENSG0000…	694	6320	16792	1.17534	0.686578	0.00642485	0.376597
GOTERM_BP_ALL	GO:2001239~regulation of extrinsic apoptotic signaling pathway in absence of ligand	10	1.16686	0.000211685	ENSG00000010810, ENSG00000064655, ENSG00000135439, ENSG00000142208, ENSG00000112319, ENSG00000104313, ENSG00000139219, ENSG00000137764, ENSG00000070193, ENSG00000092969	694	51	16792	4.74431	0.71685	0.00694691	0.4095
GOTERM_BP_ALL	GO:0040011~locomotion	92	10.7351	0.000221555	ENSG00000023902, ENSG00000105976, ENSG00000138696, ENSG00000107862, ENSG00000113448, ENSG00000197461, ENSG00000198420, ENSG00000100034, ENSG00000145824, ENSG00000196569, ENSG00000126778, ENSG00000172037, ENSG00000131375, ENSG00000124782, ENSG00000170962, ENSG00000179388, ENSG00000204217, ENSG00000133121, ENSG00000147862, ENSG00000150347, ENSG00000182636, ENSG00000163513, ENSG00000145675, ENSG0000…	694	1530	16792	1.45492	0.733029	0.00722987	0.428554
GOTERM_BP_ALL	GO:0003007~heart morphogenesis	23	2.68378	0.00022163	ENSG00000131759, ENSG00000163513, ENSG00000169946, ENSG00000183691, ENSG00000166949, ENSG00000117707, ENSG00000157240, ENSG00000114315, ENSG00000164093, ENSG00000163909, ENSG00000154734, ENSG00000092969, ENSG00000126778, ENSG00000113971, ENSG00000075223, ENSG00000138802, ENSG00000171456, ENSG00000204217, ENSG00000082014, ENSG00000127418, ENSG00000197702, ENSG00000104313, ENSG00000139219	694	230	16792	2.4196	0.733148	0.00719292	0.428698
GOTERM_BP_ALL	GO:0006807~nitrogen compound metabolic process	333	38.8565	0.000226844	ENSG00000131759, ENSG00000126070, ENSG00000169946, ENSG00000113448, ENSG00000197461, ENSG00000113240, ENSG00000087074, ENSG00000171223, ENSG00000114166, ENSG00000126778, ENSG00000166439, ENSG00000113441, ENSG00000181085, ENSG00000204524, ENSG00000078699, ENSG00000118495, ENSG00000134030, ENSG00000141644, ENSG00000136870, ENSG00000175395, ENSG00000116539, ENSG00000214872, ENSG00000144026, ENSG0000…	694	6948	16792	1.15965	0.741315	0.00732167	0.438763
GOTERM_BP_ALL	GO:0003205~cardiac chamber development	18	2.10035	0.000230199	ENSG00000131759, ENSG00000163513, ENSG00000169946, ENSG00000183691, ENSG00000117707, ENSG00000157240, ENSG00000114315, ENSG00000164093, ENSG00000163909, ENSG00000154734, ENSG00000092969, ENSG00000197603, ENSG00000075223, ENSG00000113971, ENSG00000204217, ENSG00000082014, ENSG00000127418, ENSG00000197702	694	155	16792	2.80985	0.746437	0.00738955	0.445238
GOTERM_BP_ALL	GO:0048286~lung alveolus development	9	1.05018	0.000230498	ENSG00000056586, ENSG00000198162, ENSG00000165240, ENSG00000171456, ENSG00000204217, ENSG00000197461, ENSG00000138834, ENSG00000070193, ENSG00000115461	694	41	16792	5.31131	0.74689	0.0073595	0.445816
GOTERM_BP_ALL	GO:0010720~positive regulation of cell development	38	4.43407	0.00023099	ENSG00000131759, ENSG00000153707, ENSG00000084676, ENSG00000102606, ENSG00000166949, ENSG00000117707, ENSG00000198563, ENSG00000092969, ENSG00000173039, ENSG00000148516, ENSG00000124782, ENSG00000181754, ENSG00000078699, ENSG00000204217, ENSG00000099864, ENSG00000140262, ENSG00000129152, ENSG00000174405, ENSG00000163513, ENSG00000122694, ENSG00000124006, ENSG00000103319, ENSG00000044524, ENSG0000…	694	483	16792	1.90362	0.747629	0.00733583	0.446764
GOTERM_BP_ALL	GO:0001944~vasculature development	45	5.25088	0.000235435	ENSG00000173482, ENSG00000169946, ENSG00000173546, ENSG00000197461, ENSG00000117707, ENSG00000171223, ENSG00000092969, ENSG00000126778, ENSG00000197603, ENSG00000075223, ENSG00000138802, ENSG00000170962, ENSG00000204217, ENSG00000179388, ENSG00000133121, ENSG00000162337, ENSG00000102678, ENSG00000120738, ENSG00000125931, ENSG00000163513, ENSG00000112531, ENSG00000123358, ENSG00000183691, ENSG0000…	694	610	16792	1.78495	0.75423	0.00743689	0.455344
GOTERM_BP_ALL	GO:0051674~localization of cell	82	9.56826	0.000236944	ENSG00000023902, ENSG00000105976, ENSG00000107862, ENSG00000113448, ENSG00000198420, ENSG00000197461, ENSG00000100034, ENSG00000145824, ENSG00000196569, ENSG00000126778, ENSG00000131375, ENSG00000124782, ENSG00000170962, ENSG00000179388, ENSG00000204217, ENSG00000133121, ENSG00000150347, ENSG00000182636, ENSG00000163513, ENSG00000145675, ENSG00000183691, ENSG00000147081, ENSG00000044524, ENSG0000…	694	1330	16792	1.49178	0.75643	0.00744491	0.458255
GOTERM_BP_ALL	GO:0048870~cell motility	82	9.56826	0.000236944	ENSG00000023902, ENSG00000105976, ENSG00000107862, ENSG00000113448, ENSG00000198420, ENSG00000197461, ENSG00000100034, ENSG00000145824, ENSG00000196569, ENSG00000126778, ENSG00000131375, ENSG00000124782, ENSG00000170962, ENSG00000179388, ENSG00000204217, ENSG00000133121, ENSG00000150347, ENSG00000182636, ENSG00000163513, ENSG00000145675, ENSG00000183691, ENSG00000147081, ENSG00000044524, ENSG0000…	694	1330	16792	1.49178	0.75643	0.00744491	0.458255
GOTERM_BP_ALL	GO:0009887~organ morphogenesis	65	7.5846	0.000242523	ENSG00000131759, ENSG00000138449, ENSG00000169946, ENSG00000138696, ENSG00000168769, ENSG00000197461, ENSG00000126778, ENSG00000130005, ENSG00000183688, ENSG00000178882, ENSG00000173039, ENSG00000078246, ENSG00000204217, ENSG00000147862, ENSG00000127418, ENSG00000118689, ENSG00000150347, ENSG00000214872, ENSG00000163513, ENSG00000183691, ENSG00000125812, ENSG00000114315, ENSG00000163909, ENSG0000…	694	992	16792	1.58542	0.764399	0.00757963	0.469022
GOTERM_BP_ALL	GO:1901698~response to nitrogen compound	60	7.00117	0.000249247	ENSG00000126070, ENSG00000078142, ENSG00000084636, ENSG00000113448, ENSG00000109738, ENSG00000083750, ENSG00000114166, ENSG00000171223, ENSG00000173039, ENSG00000170962, ENSG00000141644, ENSG00000118689, ENSG00000213366, ENSG00000005882, ENSG00000145675, ENSG00000122877, ENSG00000145147, ENSG00000187486, ENSG00000150471, ENSG00000121879, ENSG00000204406, ENSG00000010810, ENSG00000138814, ENSG0000…	694	895	16792	1.62208	0.773656	0.00774835	0.481995
GOTERM_BP_ALL	GO:1901699~cellular response to nitrogen compound	42	4.90082	0.000259983	ENSG00000126070, ENSG00000167244, ENSG00000084636, ENSG00000113448, ENSG00000166949, ENSG00000083750, ENSG00000114166, ENSG00000173039, ENSG00000148516, ENSG00000151422, ENSG00000145431, ENSG00000170962, ENSG00000186666, ENSG00000058668, ENSG00000118689, ENSG00000096968, ENSG00000120738, ENSG00000213366, ENSG00000005882, ENSG00000123358, ENSG00000176749, ENSG00000145675, ENSG00000220205, ENSG0000…	694	558	16792	1.8212	0.787688	0.00803886	0.502707
GOTERM_BP_ALL	GO:0061035~regulation of cartilage development	11	1.28355	0.000270697	ENSG00000131759, ENSG00000144320, ENSG00000138696, ENSG00000169762, ENSG00000183691, ENSG00000204217, ENSG00000166949, ENSG00000092969, ENSG00000183688, ENSG00000178882, ENSG00000173039	694	64	16792	4.15868	0.800825	0.00832562	0.523372
GOTERM_BP_ALL	GO:0072073~kidney epithelium development	17	1.98366	0.000277401	ENSG00000131759, ENSG00000125931, ENSG00000183691, ENSG00000125812, ENSG00000170873, ENSG00000166949, ENSG00000145147, ENSG00000185008, ENSG00000114315, ENSG00000005513, ENSG00000163909, ENSG00000126778, ENSG00000172037, ENSG00000100625, ENSG00000104313, ENSG00000164056, ENSG00000120693	694	143	16792	2.87644	0.808629	0.00848719	0.536302
GOTERM_BP_ALL	GO:0060485~mesenchyme development	23	2.68378	0.000283101	ENSG00000122694, ENSG00000163513, ENSG00000169946, ENSG00000169762, ENSG00000183691, ENSG00000197380, ENSG00000166949, ENSG00000065361, ENSG00000114315, ENSG00000124205, ENSG00000005513, ENSG00000164093, ENSG00000163909, ENSG00000092969, ENSG00000126778, ENSG00000183688, ENSG00000075223, ENSG00000204217, ENSG00000116525, ENSG00000100625, ENSG00000102678, ENSG00000070193, ENSG00000005102	694	234	16792	2.37824	0.815023	0.00861663	0.547293
GOTERM_BP_ALL	GO:0043547~positive regulation of GTPase activity	46	5.36756	0.000285633	ENSG00000084070, ENSG00000142459, ENSG00000071205, ENSG00000174485, ENSG00000102606, ENSG00000107862, ENSG00000110237, ENSG00000197461, ENSG00000139436, ENSG00000067208, ENSG00000109680, ENSG00000151892, ENSG00000108669, ENSG00000163947, ENSG00000006607, ENSG00000031003, ENSG00000133121, ENSG00000169221, ENSG00000102678, ENSG00000108239, ENSG00000196914, ENSG00000096968, ENSG00000174373, ENSG0000…	694	634	16792	1.75554	0.817794	0.0086492	0.552175
GOTERM_BP_ALL	GO:0016202~regulation of striated muscle tissue development	15	1.75029	0.000301042	ENSG00000163513, ENSG00000063660, ENSG00000169946, ENSG00000183691, ENSG00000065361, ENSG00000166949, ENSG00000198563, ENSG00000157514, ENSG00000145794, ENSG00000126778, ENSG00000114861, ENSG00000100625, ENSG00000102678, ENSG00000064309, ENSG00000129152	694	116	16792	3.12879	0.833786	0.00906767	0.58188
GOTERM_BP_ALL	GO:0060429~epithelium development	68	7.93466	0.000312201	ENSG00000131759, ENSG00000138449, ENSG00000105976, ENSG00000113448, ENSG00000197461, ENSG00000126778, ENSG00000172037, ENSG00000173039, ENSG00000121957, ENSG00000124782, ENSG00000078246, ENSG00000078699, ENSG00000204217, ENSG00000133121, ENSG00000147862, ENSG00000005102, ENSG00000163513, ENSG00000183691, ENSG00000125812, ENSG00000145147, ENSG00000185008, ENSG00000143878, ENSG00000114315, ENSG0000…	694	1060	16792	1.55219	0.844484	0.009355	0.603387
GOTERM_BP_ALL	GO:0040017~positive regulation of locomotion	34	3.96733	0.000346878	ENSG00000105976, ENSG00000102606, ENSG00000166949, ENSG00000197461, ENSG00000117707, ENSG00000100034, ENSG00000124205, ENSG00000092969, ENSG00000145824, ENSG00000151422, ENSG00000075223, ENSG00000131375, ENSG00000114861, ENSG00000145431, ENSG00000124782, ENSG00000170962, ENSG00000204217, ENSG00000096968, ENSG00000168874, ENSG00000163513, ENSG00000122694, ENSG00000107742, ENSG00000145675, ENSG0000…	694	422	16792	1.94944	0.87353	0.0103369	0.670194
GOTERM_BP_ALL	GO:0048634~regulation of muscle organ development	15	1.75029	0.000359726	ENSG00000163513, ENSG00000063660, ENSG00000169946, ENSG00000183691, ENSG00000065361, ENSG00000166949, ENSG00000198563, ENSG00000157514, ENSG00000145794, ENSG00000126778, ENSG00000114861, ENSG00000100625, ENSG00000102678, ENSG00000064309, ENSG00000129152	694	118	16792	3.07576	0.882856	0.0106645	0.694935
GOTERM_BP_ALL	GO:0002062~chondrocyte differentiation	13	1.51692	0.000390899	ENSG00000163513, ENSG00000138696, ENSG00000166949, ENSG00000183688, ENSG00000120451, ENSG00000173039, ENSG00000178882, ENSG00000204217, ENSG00000147862, ENSG00000139219, ENSG00000102678, ENSG00000104331, ENSG00000171310	694	92	16792	3.419	0.902725	0.0115262	0.75494
GOTERM_BP_ALL	GO:0009966~regulation of signal transduction	147	17.1529	0.000400037	ENSG00000126070, ENSG00000204498, ENSG00000154310, ENSG00000113448, ENSG00000197461, ENSG00000087074, ENSG00000139436, ENSG00000160310, ENSG00000112837, ENSG00000173039, ENSG00000196814, ENSG00000064655, ENSG00000170962, ENSG00000136878, ENSG00000196526, ENSG00000078699, ENSG00000204217, ENSG00000118689, ENSG00000076641, ENSG00000196914, ENSG00000116539, ENSG00000121210, ENSG00000174373, ENSG0000…	694	2728	16792	1.30381	0.907883	0.011736	0.772523
GOTERM_BP_ALL	GO:0040007~growth	61	7.11785	0.00041289	ENSG00000056586, ENSG00000144057, ENSG00000131759, ENSG00000179833, ENSG00000170242, ENSG00000107821, ENSG00000169946, ENSG00000138696, ENSG00000113448, ENSG00000080503, ENSG00000100034, ENSG00000160310, ENSG00000198563, ENSG00000126778, ENSG00000130005, ENSG00000172037, ENSG00000067445, ENSG00000204217, ENSG00000136936, ENSG00000118689, ENSG00000150347, ENSG00000163513, ENSG00000182636, ENSG0000…	694	932	16792	1.58364	0.914679	0.0120516	0.79725
GOTERM_BP_ALL	GO:0051093~negative regulation of developmental process	51	5.95099	0.000412901	ENSG00000131759, ENSG00000169946, ENSG00000168172, ENSG00000145824, ENSG00000183688, ENSG00000126778, ENSG00000112837, ENSG00000178882, ENSG00000078246, ENSG00000078699, ENSG00000204217, ENSG00000078399, ENSG00000147862, ENSG00000133121, ENSG00000141644, ENSG00000118689, ENSG00000121210, ENSG00000163513, ENSG00000145675, ENSG00000183691, ENSG00000197380, ENSG00000145147, ENSG00000185008, ENSG0000…	694	739	16792	1.66982	0.914685	0.0119932	0.797272
GOTERM_BP_ALL	GO:2000147~positive regulation of cell motility	33	3.85064	0.000417047	ENSG00000102606, ENSG00000105976, ENSG00000166949, ENSG00000197461, ENSG00000117707, ENSG00000100034, ENSG00000124205, ENSG00000092969, ENSG00000145824, ENSG00000151422, ENSG00000075223, ENSG00000131375, ENSG00000114861, ENSG00000145431, ENSG00000124782, ENSG00000170962, ENSG00000204217, ENSG00000096968, ENSG00000168874, ENSG00000163513, ENSG00000122694, ENSG00000107742, ENSG00000145675, ENSG0000…	694	409	16792	1.95224	0.916768	0.0120542	0.805246
GOTERM_BP_ALL	GO:0061564~axon development	35	4.08401	0.000419293	ENSG00000173482, ENSG00000138696, ENSG00000196569, ENSG00000092969, ENSG00000172037, ENSG00000076356, ENSG00000075223, ENSG00000114861, ENSG00000179542, ENSG00000181754, ENSG00000204217, ENSG00000165379, ENSG00000147862, ENSG00000096968, ENSG00000141622, ENSG00000041982, ENSG00000182636, ENSG00000063660, ENSG00000140937, ENSG00000176749, ENSG00000183691, ENSG00000122877, ENSG00000044524, ENSG0000…	694	445	16792	1.90305	0.917875	0.0120602	0.809565
GOTERM_BP_ALL	GO:0040001~establishment of mitotic spindle localization	7	0.816803	0.000436804	ENSG00000121957, ENSG00000116584, ENSG00000137497, ENSG00000074054, ENSG00000104313, ENSG00000070193, ENSG00000164056	694	25	16792	6.77487	0.926017	0.0125005	0.84324
GOTERM_BP_ALL	GO:0002063~chondrocyte development	7	0.816803	0.000436804	ENSG00000163513, ENSG00000138696, ENSG00000204217, ENSG00000104331, ENSG00000183688, ENSG00000178882, ENSG00000171310	694	25	16792	6.77487	0.926017	0.0125005	0.84324
GOTERM_BP_ALL	GO:0030334~regulation of cell migration	48	5.60093	0.00044824	ENSG00000173482, ENSG00000105976, ENSG00000102606, ENSG00000166949, ENSG00000198420, ENSG00000197461, ENSG00000117707, ENSG00000100034, ENSG00000124205, ENSG00000196569, ENSG00000145824, ENSG00000092969, ENSG00000151422, ENSG00000075223, ENSG00000076356, ENSG00000131375, ENSG00000114861, ENSG00000145431, ENSG00000124782, ENSG00000170962, ENSG00000204217, ENSG00000133121, ENSG00000181751, ENSG0000…	694	685	16792	1.69548	0.930894	0.0127645	0.865226
GOTERM_BP_ALL	GO:0023051~regulation of signaling	162	18.9032	0.000466974	ENSG00000131759, ENSG00000126070, ENSG00000204498, ENSG00000154310, ENSG00000113448, ENSG00000197461, ENSG00000087074, ENSG00000139436, ENSG00000160310, ENSG00000112837, ENSG00000173039, ENSG00000196814, ENSG00000064655, ENSG00000170962, ENSG00000136878, ENSG00000196526, ENSG00000078699, ENSG00000204217, ENSG00000118689, ENSG00000076641, ENSG00000116539, ENSG00000196914, ENSG00000121210, ENSG0000…	694	3070	16792	1.27679	0.938198	0.0132314	0.901233
GOTERM_BP_ALL	GO:0051293~establishment of spindle localization	8	0.933489	0.000484245	ENSG00000121957, ENSG00000116584, ENSG00000137497, ENSG00000047849, ENSG00000074054, ENSG00000104313, ENSG00000070193, ENSG00000164056	694	35	16792	5.53051	0.944246	0.0136526	0.934417
GOTERM_BP_ALL	GO:0030335~positive regulation of cell migration	32	3.73396	0.00048435	ENSG00000102606, ENSG00000105976, ENSG00000166949, ENSG00000197461, ENSG00000117707, ENSG00000100034, ENSG00000124205, ENSG00000092969, ENSG00000145824, ENSG00000151422, ENSG00000075223, ENSG00000131375, ENSG00000114861, ENSG00000145431, ENSG00000124782, ENSG00000170962, ENSG00000204217, ENSG00000096968, ENSG00000168874, ENSG00000163513, ENSG00000122694, ENSG00000145675, ENSG00000074054, ENSG0000…	694	395	16792	1.96018	0.94428	0.0135913	0.934618
GOTERM_BP_ALL	GO:0060562~epithelial tube morphogenesis	27	3.15053	0.00048445	ENSG00000125931, ENSG00000131759, ENSG00000163513, ENSG00000105976, ENSG00000183691, ENSG00000125812, ENSG00000170873, ENSG00000166949, ENSG00000157240, ENSG00000145147, ENSG00000143878, ENSG00000114315, ENSG00000005513, ENSG00000164093, ENSG00000092969, ENSG00000126778, ENSG00000196576, ENSG00000113971, ENSG00000138802, ENSG00000078246, ENSG00000133121, ENSG00000162337, ENSG00000100625, ENSG0000…	694	309	16792	2.11421	0.944314	0.0135304	0.934811
GOTERM_BP_ALL	GO:0060487~lung epithelial cell differentiation	7	0.816803	0.00054821	ENSG00000121957, ENSG00000114861, ENSG00000127528, ENSG00000137497, ENSG00000147862, ENSG00000104313, ENSG00000070193	694	26	16792	6.5143	0.961926	0.0152267	1.05723
GOTERM_BP_ALL	GO:0003002~regionalization	28	3.26721	0.000557507	ENSG00000175879, ENSG00000138696, ENSG00000166949, ENSG00000121989, ENSG00000112837, ENSG00000159388, ENSG00000075223, ENSG00000076356, ENSG00000078246, ENSG00000204217, ENSG00000078399, ENSG00000010803, ENSG00000162337, ENSG00000005102, ENSG00000168283, ENSG00000183691, ENSG00000122592, ENSG00000122877, ENSG00000179981, ENSG00000114315, ENSG00000253293, ENSG00000164093, ENSG00000128709, ENSG0000…	694	329	16792	2.05923	0.96398	0.0154112	1.07506
GOTERM_BP_ALL	GO:0010464~regulation of mesenchymal cell proliferation	8	0.933489	0.000579991	ENSG00000163513, ENSG00000114861, ENSG00000197461, ENSG00000147862, ENSG00000162337, ENSG00000102678, ENSG00000126778, ENSG00000148516	694	36	16792	5.37688	0.968499	0.0159539	1.11819
GOTERM_BP_ALL	GO:0010243~response to organonitrogen compound	53	6.18436	0.000586185	ENSG00000078142, ENSG00000084636, ENSG00000113448, ENSG00000109738, ENSG00000083750, ENSG00000114166, ENSG00000171223, ENSG00000173039, ENSG00000170962, ENSG00000118689, ENSG00000141644, ENSG00000213366, ENSG00000005882, ENSG00000145675, ENSG00000122877, ENSG00000145147, ENSG00000187486, ENSG00000150471, ENSG00000121879, ENSG00000204406, ENSG00000010810, ENSG00000138814, ENSG00000116584, ENSG0000…	694	789	16792	1.62533	0.969642	0.0160489	1.13007
GOTERM_BP_ALL	GO:0048608~reproductive structure development	33	3.85064	0.00059516	ENSG00000131759, ENSG00000084676, ENSG00000169946, ENSG00000138696, ENSG00000121989, ENSG00000143437, ENSG00000154734, ENSG00000171223, ENSG00000092969, ENSG00000242265, ENSG00000123572, ENSG00000129757, ENSG00000204217, ENSG00000078399, ENSG00000118689, ENSG00000102678, ENSG00000150347, ENSG00000041982, ENSG00000125931, ENSG00000183691, ENSG00000073614, ENSG00000145147, ENSG00000185008, ENSG0000…	694	418	16792	1.91021	0.971224	0.0162182	1.14727
GOTERM_BP_ALL	GO:0010646~regulation of cell communication	159	18.5531	0.000606638	ENSG00000131759, ENSG00000126070, ENSG00000204498, ENSG00000154310, ENSG00000113448, ENSG00000197461, ENSG00000087074, ENSG00000139436, ENSG00000160310, ENSG00000112837, ENSG00000173039, ENSG00000196814, ENSG00000064655, ENSG00000170962, ENSG00000136878, ENSG00000196526, ENSG00000078699, ENSG00000204217, ENSG00000118689, ENSG00000076641, ENSG00000196914, ENSG00000116539, ENSG00000121210, ENSG0000…	694	3020	16792	1.27389	0.973128	0.0164533	1.16928
GOTERM_BP_ALL	GO:0048015~phosphatidylinositol-mediated signaling	19	2.21704	0.000621022	ENSG00000126070, ENSG00000145675, ENSG00000078142, ENSG00000065361, ENSG00000197461, ENSG00000143393, ENSG00000107130, ENSG00000121879, ENSG00000092969, ENSG00000010810, ENSG00000145431, ENSG00000135439, ENSG00000142208, ENSG00000160867, ENSG00000170962, ENSG00000186654, ENSG00000102678, ENSG00000070193, ENSG00000096968	694	184	16792	2.4985	0.975337	0.016764	1.19684
GOTERM_BP_ALL	GO:0048514~blood vessel morphogenesis	37	4.31739	0.000632737	ENSG00000173482, ENSG00000169946, ENSG00000173546, ENSG00000197461, ENSG00000117707, ENSG00000171223, ENSG00000092969, ENSG00000126778, ENSG00000138802, ENSG00000204217, ENSG00000179388, ENSG00000133121, ENSG00000162337, ENSG00000102678, ENSG00000125931, ENSG00000163513, ENSG00000123358, ENSG00000112531, ENSG00000183691, ENSG00000122592, ENSG00000145147, ENSG00000173511, ENSG00000135250, ENSG0000…	694	491	16792	1.82332	0.977001	0.0170007	1.21929
GOTERM_BP_ALL	GO:0007422~peripheral nervous system development	11	1.28355	0.000636909	ENSG00000063660, ENSG00000142208, ENSG00000179388, ENSG00000122877, ENSG00000065361, ENSG00000134202, ENSG00000005513, ENSG00000196569, ENSG00000128709, ENSG00000173039, ENSG00000172037	694	71	16792	3.74867	0.977566	0.0170351	1.22728
GOTERM_BP_ALL	GO:0009952~anterior/posterior pattern specification	20	2.33372	0.000637744	ENSG00000175879, ENSG00000183691, ENSG00000166949, ENSG00000122592, ENSG00000121989, ENSG00000179981, ENSG00000114315, ENSG00000253293, ENSG00000128709, ENSG00000112837, ENSG00000159388, ENSG00000075223, ENSG00000076356, ENSG00000078246, ENSG00000204217, ENSG00000010803, ENSG00000078399, ENSG00000162337, ENSG00000064309, ENSG00000005102	694	200	16792	2.4196	0.977678	0.016981	1.22888
GOTERM_BP_ALL	GO:0051272~positive regulation of cellular component movement	33	3.85064	0.000656686	ENSG00000102606, ENSG00000105976, ENSG00000166949, ENSG00000197461, ENSG00000117707, ENSG00000100034, ENSG00000124205, ENSG00000092969, ENSG00000145824, ENSG00000151422, ENSG00000075223, ENSG00000131375, ENSG00000114861, ENSG00000145431, ENSG00000124782, ENSG00000170962, ENSG00000204217, ENSG00000096968, ENSG00000168874, ENSG00000163513, ENSG00000122694, ENSG00000107742, ENSG00000145675, ENSG0000…	694	420	16792	1.90111	0.980062	0.0174034	1.26516
GOTERM_BP_ALL	GO:0060479~lung cell differentiation	7	0.816803	0.00068049	ENSG00000121957, ENSG00000114861, ENSG00000127528, ENSG00000137497, ENSG00000147862, ENSG00000104313, ENSG00000070193	694	27	16792	6.27303	0.982701	0.017949	1.31074
GOTERM_BP_ALL	GO:2000145~regulation of cell motility	50	5.83431	0.000683658	ENSG00000105976, ENSG00000198420, ENSG00000197461, ENSG00000100034, ENSG00000196569, ENSG00000145824, ENSG00000131375, ENSG00000124782, ENSG00000170962, ENSG00000204217, ENSG00000133121, ENSG00000163513, ENSG00000145675, ENSG00000183691, ENSG00000145147, ENSG00000164938, ENSG00000143878, ENSG00000145349, ENSG00000142208, ENSG00000134982, ENSG00000137764, ENSG00000070193, ENSG00000144824, ENSG0000…	694	736	16792	1.64375	0.983025	0.0179524	1.3168
GOTERM_BP_ALL	GO:0071417~cellular response to organonitrogen compound	36	4.2007	0.000739071	ENSG00000167244, ENSG00000084636, ENSG00000113448, ENSG00000083750, ENSG00000114166, ENSG00000173039, ENSG00000148516, ENSG00000151422, ENSG00000145431, ENSG00000170962, ENSG00000058668, ENSG00000118689, ENSG00000096968, ENSG00000120738, ENSG00000213366, ENSG00000005882, ENSG00000123358, ENSG00000145675, ENSG00000198838, ENSG00000220205, ENSG00000103319, ENSG00000145147, ENSG00000187486, ENSG0000…	694	477	16792	1.82611	0.987802	0.0193089	1.42281
GOTERM_BP_ALL	GO:0061458~reproductive system development	33	3.85064	0.000741545	ENSG00000131759, ENSG00000084676, ENSG00000169946, ENSG00000138696, ENSG00000121989, ENSG00000143437, ENSG00000154734, ENSG00000171223, ENSG00000092969, ENSG00000242265, ENSG00000123572, ENSG00000129757, ENSG00000204217, ENSG00000078399, ENSG00000118689, ENSG00000102678, ENSG00000150347, ENSG00000041982, ENSG00000125931, ENSG00000183691, ENSG00000073614, ENSG00000145147, ENSG00000185008, ENSG0000…	694	423	16792	1.88763	0.987981	0.0192884	1.42754
GOTERM_BP_ALL	GO:0048017~inositol lipid-mediated signaling	19	2.21704	0.000751537	ENSG00000126070, ENSG00000145675, ENSG00000078142, ENSG00000065361, ENSG00000197461, ENSG00000143393, ENSG00000107130, ENSG00000121879, ENSG00000092969, ENSG00000010810, ENSG00000145431, ENSG00000135439, ENSG00000142208, ENSG00000160867, ENSG00000170962, ENSG00000186654, ENSG00000102678, ENSG00000070193, ENSG00000096968	694	187	16792	2.45841	0.988676	0.019461	1.44664
GOTERM_BP_ALL	GO:0043412~macromolecule modification	205	23.9207	0.000755737	ENSG00000131759, ENSG00000183496, ENSG00000154310, ENSG00000078142, ENSG00000113448, ENSG00000197461, ENSG00000113240, ENSG00000185019, ENSG00000103227, ENSG00000087074, ENSG00000114166, ENSG00000166439, ENSG00000113441, ENSG00000181085, ENSG00000127452, ENSG00000136878, ENSG00000196998, ENSG00000141644, ENSG00000116539, ENSG00000214872, ENSG00000168283, ENSG00000170185, ENSG00000145675, ENSG0000…	694	4065	16792	1.22021	0.988956	0.0194841	1.45467
GOTERM_BP_ALL	GO:0090287~regulation of cellular response to growth factor stimulus	22	2.56709	0.000759135	ENSG00000125931, ENSG00000163513, ENSG00000063660, ENSG00000183691, ENSG00000166949, ENSG00000121989, ENSG00000157240, ENSG00000145147, ENSG00000173511, ENSG00000143437, ENSG00000114315, ENSG00000148516, ENSG00000242265, ENSG00000196628, ENSG00000129757, ENSG00000204217, ENSG00000102678, ENSG00000070193, ENSG00000164056, ENSG00000141622, ENSG00000180875, ENSG00000171310	694	235	16792	2.26515	0.989178	0.0194866	1.46116
GOTERM_BP_ALL	GO:0014066~regulation of phosphatidylinositol 3-kinase signaling	16	1.86698	0.000783228	ENSG00000145675, ENSG00000065361, ENSG00000197461, ENSG00000181744, ENSG00000121879, ENSG00000092969, ENSG00000010810, ENSG00000145431, ENSG00000135439, ENSG00000142208, ENSG00000160867, ENSG00000170962, ENSG00000186654, ENSG00000102678, ENSG00000070193, ENSG00000096968	694	142	16792	2.72631	0.990626	0.0200129	1.5072
GOTERM_BP_ALL	GO:0007169~transmembrane receptor protein tyrosine kinase signaling pathway	45	5.25088	0.000839318	ENSG00000167244, ENSG00000105976, ENSG00000102606, ENSG00000173546, ENSG00000197461, ENSG00000143437, ENSG00000151422, ENSG00000173039, ENSG00000151892, ENSG00000030304, ENSG00000196814, ENSG00000145431, ENSG00000170962, ENSG00000105397, ENSG00000204217, ENSG00000127418, ENSG00000089177, ENSG00000076641, ENSG00000102678, ENSG00000150347, ENSG00000096968, ENSG00000063660, ENSG00000182636, ENSG0000…	694	648	16792	1.68028	0.993292	0.0213399	1.61431
GOTERM_BP_ALL	GO:0007178~transmembrane receptor protein serine/threonine kinase signaling pathway	27	3.15053	0.000890621	ENSG00000174136, ENSG00000138696, ENSG00000166949, ENSG00000121989, ENSG00000157240, ENSG00000092969, ENSG00000148516, ENSG00000113441, ENSG00000242265, ENSG00000129757, ENSG00000204217, ENSG00000026025, ENSG00000102678, ENSG00000141622, ENSG00000120693, ENSG00000120738, ENSG00000168874, ENSG00000163513, ENSG00000125931, ENSG00000183691, ENSG00000147081, ENSG00000039319, ENSG00000114315, ENSG0000…	694	322	16792	2.02885	0.99506	0.0225339	1.71218
GOTERM_BP_ALL	GO:0043010~camera-type eye development	25	2.91715	0.000895263	ENSG00000131759, ENSG00000173482, ENSG00000138696, ENSG00000166949, ENSG00000117707, ENSG00000092969, ENSG00000148516, ENSG00000172037, ENSG00000078246, ENSG00000129757, ENSG00000204217, ENSG00000162337, ENSG00000026025, ENSG00000058668, ENSG00000163513, ENSG00000005513, ENSG00000164093, ENSG00000127152, ENSG00000082014, ENSG00000106025, ENSG00000107859, ENSG00000064309, ENSG00000125952, ENSG0000…	694	288	16792	2.10034	0.995195	0.0225544	1.72103
GOTERM_BP_ALL	GO:0000226~microtubule cytoskeleton organization	33	3.85064	0.000900089	ENSG00000135837, ENSG00000168172, ENSG00000182923, ENSG00000151422, ENSG00000107771, ENSG00000121957, ENSG00000102781, ENSG00000169515, ENSG00000116717, ENSG00000124006, ENSG00000112659, ENSG00000074054, ENSG00000170390, ENSG00000115561, ENSG00000159713, ENSG00000054282, ENSG00000094631, ENSG00000100503, ENSG00000116584, ENSG00000167566, ENSG00000170004, ENSG00000127914, ENSG00000137497, ENSG0000…	694	428	16792	1.86558	0.995332	0.0225793	1.73023
GOTERM_BP_ALL	GO:0071407~cellular response to organic cyclic compound	38	4.43407	0.000932614	ENSG00000131759, ENSG00000084676, ENSG00000126070, ENSG00000113448, ENSG00000166949, ENSG00000204231, ENSG00000160310, ENSG00000173039, ENSG00000114861, ENSG00000186666, ENSG00000058668, ENSG00000145604, ENSG00000118689, ENSG00000129152, ENSG00000096968, ENSG00000120693, ENSG00000041982, ENSG00000108510, ENSG00000213366, ENSG00000123358, ENSG00000198838, ENSG00000164758, ENSG00000103319, ENSG0000…	694	520	16792	1.76817	0.996155	0.023288	1.79222
GOTERM_BP_ALL	GO:0040012~regulation of locomotion	51	5.95099	0.00095203	ENSG00000105976, ENSG00000198420, ENSG00000197461, ENSG00000100034, ENSG00000196569, ENSG00000145824, ENSG00000131375, ENSG00000124782, ENSG00000170962, ENSG00000204217, ENSG00000133121, ENSG00000163513, ENSG00000145675, ENSG00000183691, ENSG00000145147, ENSG00000185008, ENSG00000164938, ENSG00000143878, ENSG00000145349, ENSG00000142208, ENSG00000134982, ENSG00000137764, ENSG00000070193, ENSG0000…	694	768	16792	1.60676	0.996576	0.0236682	1.82921
GOTERM_BP_ALL	GO:0048666~neuron development	61	7.11785	0.000981252	ENSG00000154310, ENSG00000138696, ENSG00000196569, ENSG00000172037, ENSG00000179542, ENSG00000006607, ENSG00000078699, ENSG00000204217, ENSG00000165379, ENSG00000147862, ENSG00000099864, ENSG00000182636, ENSG00000140937, ENSG00000183691, ENSG00000122877, ENSG00000044524, ENSG00000145147, ENSG00000185008, ENSG00000114315, ENSG00000128709, ENSG00000010810, ENSG00000138814, ENSG00000049759, ENSG0000…	694	965	16792	1.52949	0.997123	0.0242848	1.88485
GOTERM_BP_ALL	GO:0051962~positive regulation of nervous system development	34	3.96733	0.0010068	ENSG00000131759, ENSG00000153707, ENSG00000084676, ENSG00000117707, ENSG00000148516, ENSG00000173039, ENSG00000179542, ENSG00000181754, ENSG00000078699, ENSG00000204217, ENSG00000173114, ENSG00000099864, ENSG00000140262, ENSG00000174405, ENSG00000124006, ENSG00000103319, ENSG00000044524, ENSG00000145147, ENSG00000185008, ENSG00000150471, ENSG00000114315, ENSG00000005513, ENSG00000163909, ENSG0000…	694	449	16792	1.83221	0.99753	0.0248066	1.93347
GOTERM_BP_ALL	GO:0007409~axonogenesis	32	3.73396	0.00101054	ENSG00000173482, ENSG00000138696, ENSG00000092969, ENSG00000196569, ENSG00000172037, ENSG00000076356, ENSG00000075223, ENSG00000114861, ENSG00000179542, ENSG00000181754, ENSG00000204217, ENSG00000165379, ENSG00000147862, ENSG00000141622, ENSG00000182636, ENSG00000063660, ENSG00000140937, ENSG00000176749, ENSG00000183691, ENSG00000122877, ENSG00000145147, ENSG00000185008, ENSG00000196576, ENSG0000…	694	413	16792	1.87475	0.997584	0.0247951	1.94057
GOTERM_BP_ALL	GO:0001656~metanephros development	12	1.40023	0.00106685	ENSG00000125931, ENSG00000197461, ENSG00000100625, ENSG00000104313, ENSG00000185008, ENSG00000114315, ENSG00000005513, ENSG00000070193, ENSG00000164056, ENSG00000126778, ENSG00000172037, ENSG00000120738	694	89	16792	3.26238	0.998274	0.0260522	2.04766
GOTERM_BP_ALL	GO:0061138~morphogenesis of a branching epithelium	18	2.10035	0.00106766	ENSG00000125931, ENSG00000163513, ENSG00000183691, ENSG00000105976, ENSG00000125812, ENSG00000117707, ENSG00000197461, ENSG00000145147, ENSG00000005513, ENSG00000164093, ENSG00000126778, ENSG00000075223, ENSG00000100625, ENSG00000162337, ENSG00000104313, ENSG00000070193, ENSG00000164056, ENSG00000041982	694	177	16792	2.46061	0.998282	0.0259654	2.0492
GOTERM_BP_ALL	GO:0016043~cellular component organization	292	34.0723	0.00107013	ENSG00000126070, ENSG00000107821, ENSG00000154310, ENSG00000078142, ENSG00000084636, ENSG00000197461, ENSG00000067208, ENSG00000107130, ENSG00000114166, ENSG00000183688, ENSG00000126778, ENSG00000182923, ENSG00000113441, ENSG00000121957, ENSG00000181085, ENSG00000078699, ENSG00000196998, ENSG00000141644, ENSG00000116539, ENSG00000168283, ENSG00000145675, ENSG00000183691, ENSG00000164938, ENSG0000…	694	6109	16792	1.15653	0.998307	0.0259191	2.0539
GOTERM_BP_ALL	GO:0097191~extrinsic apoptotic signaling pathway	21	2.45041	0.00107268	ENSG00000100234, ENSG00000145675, ENSG00000138696, ENSG00000166949, ENSG00000065361, ENSG00000092969, ENSG00000173039, ENSG00000010810, ENSG00000116584, ENSG00000015171, ENSG00000135439, ENSG00000064655, ENSG00000142208, ENSG00000165943, ENSG00000112319, ENSG00000104313, ENSG00000139219, ENSG00000118689, ENSG00000137764, ENSG00000070193, ENSG00000096968	694	225	16792	2.25829	0.998333	0.0258749	2.05874
GOTERM_BP_ALL	GO:0051653~spindle localization	8	0.933489	0.00112278	ENSG00000121957, ENSG00000116584, ENSG00000137497, ENSG00000047849, ENSG00000074054, ENSG00000104313, ENSG00000070193, ENSG00000164056	694	40	16792	4.83919	0.998764	0.0269587	2.15391
GOTERM_BP_ALL	GO:0007423~sensory organ development	37	4.31739	0.00113012	ENSG00000173482, ENSG00000131759, ENSG00000138696, ENSG00000166949, ENSG00000117707, ENSG00000092969, ENSG00000145824, ENSG00000126778, ENSG00000172037, ENSG00000148516, ENSG00000138802, ENSG00000078246, ENSG00000129757, ENSG00000204217, ENSG00000162337, ENSG00000058668, ENSG00000026025, ENSG00000102678, ENSG00000163513, ENSG00000183691, ENSG00000179981, ENSG00000114315, ENSG00000005513, ENSG0000…	694	507	16792	1.76578	0.998817	0.0270237	2.16784
GOTERM_BP_ALL	GO:0003231~cardiac ventricle development	14	1.63361	0.00116491	ENSG00000163513, ENSG00000169946, ENSG00000183691, ENSG00000117707, ENSG00000157240, ENSG00000114315, ENSG00000164093, ENSG00000092969, ENSG00000163909, ENSG00000197603, ENSG00000075223, ENSG00000204217, ENSG00000082014, ENSG00000127418	694	118	16792	2.87071	0.999038	0.0277332	2.23385
GOTERM_BP_ALL	GO:0048568~embryonic organ development	32	3.73396	0.00117958	ENSG00000131759, ENSG00000084676, ENSG00000169946, ENSG00000166949, ENSG00000197461, ENSG00000117707, ENSG00000143437, ENSG00000171223, ENSG00000092969, ENSG00000126778, ENSG00000148516, ENSG00000138802, ENSG00000123572, ENSG00000078246, ENSG00000129757, ENSG00000102678, ENSG00000125931, ENSG00000163513, ENSG00000183691, ENSG00000122592, ENSG00000179981, ENSG00000114315, ENSG00000164093, ENSG0000…	694	417	16792	1.85676	0.999119	0.0279661	2.26168
GOTERM_BP_ALL	GO:0030522~intracellular receptor signaling pathway	23	2.68378	0.00124332	ENSG00000108510, ENSG00000131759, ENSG00000084676, ENSG00000123358, ENSG00000164758, ENSG00000143171, ENSG00000160310, ENSG00000204231, ENSG00000143437, ENSG00000198597, ENSG00000163909, ENSG00000012822, ENSG00000112584, ENSG00000173039, ENSG00000094631, ENSG00000114861, ENSG00000171456, ENSG00000180530, ENSG00000100320, ENSG00000115548, ENSG00000145604, ENSG00000139687, ENSG00000096968	694	261	16792	2.13221	0.999398	0.0293393	2.38251
GOTERM_BP_ALL	GO:0016576~histone dephosphorylation	4	0.466744	0.00127471	ENSG00000064655, ENSG00000112319, ENSG00000104313, ENSG00000100034	694	6	16792	16.1306	0.999501	0.0299508	2.44196
GOTERM_BP_ALL	GO:0031175~neuron projection development	53	6.18436	0.00127567	ENSG00000154310, ENSG00000138696, ENSG00000196569, ENSG00000172037, ENSG00000179542, ENSG00000078699, ENSG00000204217, ENSG00000147862, ENSG00000165379, ENSG00000099864, ENSG00000182636, ENSG00000140937, ENSG00000183691, ENSG00000122877, ENSG00000044524, ENSG00000145147, ENSG00000185008, ENSG00000010810, ENSG00000138814, ENSG00000049759, ENSG00000127152, ENSG00000153707, ENSG00000173482, ENSG0000…	694	817	16792	1.56963	0.999503	0.0298554	2.44378
GOTERM_BP_ALL	GO:0043401~steroid hormone mediated signaling pathway	18	2.10035	0.00128494	ENSG00000131759, ENSG00000108510, ENSG00000084676, ENSG00000123358, ENSG00000164758, ENSG00000143171, ENSG00000160310, ENSG00000204231, ENSG00000163909, ENSG00000012822, ENSG00000094631, ENSG00000114861, ENSG00000180530, ENSG00000100320, ENSG00000115548, ENSG00000145604, ENSG00000139687, ENSG00000096968	694	180	16792	2.4196	0.99953	0.0299516	2.46132
GOTERM_BP_ALL	GO:0032501~multicellular organismal process	330	38.5064	0.00128684	ENSG00000131759, ENSG00000107821, ENSG00000169946, ENSG00000154310, ENSG00000084636, ENSG00000113448, ENSG00000197461, ENSG00000103227, ENSG00000067208, ENSG00000107130, ENSG00000171223, ENSG00000183688, ENSG00000126778, ENSG00000113441, ENSG00000121957, ENSG00000131375, ENSG00000078699, ENSG00000118495, ENSG00000141644, ENSG00000116539, ENSG00000214872, ENSG00000121210, ENSG00000168283, ENSG0000…	694	7027	16792	1.13628	0.999535	0.0298784	2.46491
GOTERM_BP_ALL	GO:0008406~gonad development	20	2.33372	0.00135657	ENSG00000131759, ENSG00000084676, ENSG00000169946, ENSG00000138696, ENSG00000073614, ENSG00000121989, ENSG00000145147, ENSG00000185008, ENSG00000253293, ENSG00000005513, ENSG00000164093, ENSG00000154734, ENSG00000092969, ENSG00000180530, ENSG00000078399, ENSG00000100625, ENSG00000118689, ENSG00000102678, ENSG00000125875, ENSG00000150347	694	213	16792	2.27192	0.999694	0.031351	2.59683
GOTERM_BP_ALL	GO:0000132~establishment of mitotic spindle orientation	6	0.700117	0.00138369	ENSG00000121957, ENSG00000116584, ENSG00000137497, ENSG00000104313, ENSG00000070193, ENSG00000164056	694	21	16792	6.91313	0.999739	0.0318446	2.64808
GOTERM_BP_ALL	GO:0006935~chemotaxis	39	4.55076	0.00145241	ENSG00000173482, ENSG00000138696, ENSG00000105976, ENSG00000107862, ENSG00000113448, ENSG00000166949, ENSG00000197461, ENSG00000100034, ENSG00000124205, ENSG00000196569, ENSG00000092969, ENSG00000145824, ENSG00000172037, ENSG00000151422, ENSG00000075223, ENSG00000076356, ENSG00000114861, ENSG00000170962, ENSG00000204217, ENSG00000179388, ENSG00000147862, ENSG00000141622, ENSG00000063660, ENSG0000…	694	552	16792	1.7095	0.999827	0.0332724	2.77785
GOTERM_BP_ALL	GO:0042330~taxis	39	4.55076	0.00146706	ENSG00000173482, ENSG00000138696, ENSG00000105976, ENSG00000107862, ENSG00000113448, ENSG00000166949, ENSG00000197461, ENSG00000100034, ENSG00000124205, ENSG00000196569, ENSG00000092969, ENSG00000145824, ENSG00000172037, ENSG00000151422, ENSG00000075223, ENSG00000076356, ENSG00000114861, ENSG00000170962, ENSG00000204217, ENSG00000179388, ENSG00000147862, ENSG00000141622, ENSG00000063660, ENSG0000…	694	553	16792	1.70641	0.999842	0.0334741	2.8055
GOTERM_BP_ALL	GO:0051270~regulation of cellular component movement	52	6.06768	0.00146992	ENSG00000105976, ENSG00000113448, ENSG00000198420, ENSG00000197461, ENSG00000100034, ENSG00000196569, ENSG00000145824, ENSG00000131375, ENSG00000124782, ENSG00000170962, ENSG00000204217, ENSG00000133121, ENSG00000163513, ENSG00000145675, ENSG00000183691, ENSG00000145147, ENSG00000164938, ENSG00000143878, ENSG00000145349, ENSG00000142208, ENSG00000134982, ENSG00000137764, ENSG00000070193, ENSG0000…	694	802	16792	1.56882	0.999844	0.0334105	2.8109
GOTERM_BP_ALL	GO:0050769~positive regulation of neurogenesis	30	3.50058	0.00148643	ENSG00000131759, ENSG00000153707, ENSG00000084676, ENSG00000117707, ENSG00000148516, ENSG00000173039, ENSG00000181754, ENSG00000078699, ENSG00000204217, ENSG00000099864, ENSG00000140262, ENSG00000174405, ENSG00000124006, ENSG00000103319, ENSG00000044524, ENSG00000145147, ENSG00000185008, ENSG00000114315, ENSG00000005513, ENSG00000163909, ENSG00000196576, ENSG00000010810, ENSG00000196628, ENSG0000…	694	387	16792	1.87566	0.999859	0.0336513	2.84203
GOTERM_BP_ALL	GO:0051056~regulation of small GTPase mediated signal transduction	25	2.91715	0.00149391	ENSG00000071205, ENSG00000102606, ENSG00000107862, ENSG00000110237, ENSG00000092969, ENSG00000072422, ENSG00000108669, ENSG00000006607, ENSG00000163947, ENSG00000133121, ENSG00000031003, ENSG00000196914, ENSG00000174373, ENSG00000147145, ENSG00000145147, ENSG00000145349, ENSG00000143878, ENSG00000066933, ENSG00000116584, ENSG00000100485, ENSG00000079482, ENSG00000064309, ENSG00000070193, ENSG0000…	694	299	16792	2.02307	0.999865	0.0336899	2.85613
GOTERM_BP_ALL	GO:0001654~eye development	27	3.15053	0.00150393	ENSG00000131759, ENSG00000173482, ENSG00000138696, ENSG00000166949, ENSG00000117707, ENSG00000092969, ENSG00000148516, ENSG00000172037, ENSG00000078246, ENSG00000129757, ENSG00000204217, ENSG00000162337, ENSG00000026025, ENSG00000058668, ENSG00000102678, ENSG00000163513, ENSG00000005513, ENSG00000164093, ENSG00000127152, ENSG00000082014, ENSG00000106025, ENSG00000107859, ENSG00000064309, ENSG0000…	694	334	16792	1.95596	0.999873	0.0337846	2.87504
GOTERM_BP_ALL	GO:0031344~regulation of cell projection organization	40	4.66744	0.00150659	ENSG00000153707, ENSG00000142459, ENSG00000154310, ENSG00000169762, ENSG00000102606, ENSG00000067208, ENSG00000107130, ENSG00000109680, ENSG00000151422, ENSG00000075223, ENSG00000076356, ENSG00000124782, ENSG00000181754, ENSG00000078699, ENSG00000204217, ENSG00000026025, ENSG00000169221, ENSG00000099864, ENSG00000176749, ENSG00000124006, ENSG00000103319, ENSG00000044524, ENSG00000145147, ENSG0000…	694	572	16792	1.69203	0.999875	0.0337163	2.88004
GOTERM_BP_ALL	GO:0048704~embryonic skeletal system morphogenesis	12	1.40023	0.00153531	ENSG00000163513, ENSG00000078246, ENSG00000183691, ENSG00000166949, ENSG00000122592, ENSG00000100625, ENSG00000104313, ENSG00000139219, ENSG00000126778, ENSG00000128709, ENSG00000148516, ENSG00000171310	694	93	16792	3.12206	0.999895	0.0342202	2.93418
GOTERM_BP_ALL	GO:0030010~establishment of cell polarity	12	1.40023	0.00153531	ENSG00000121957, ENSG00000116584, ENSG00000107862, ENSG00000114541, ENSG00000137497, ENSG00000047849, ENSG00000074054, ENSG00000104313, ENSG00000114315, ENSG00000070193, ENSG00000164056, ENSG00000054282	694	93	16792	3.12206	0.999895	0.0342202	2.93418
GOTERM_BP_ALL	GO:0060425~lung morphogenesis	9	1.05018	0.00156679	ENSG00000163513, ENSG00000138802, ENSG00000183691, ENSG00000147862, ENSG00000138834, ENSG00000070193, ENSG00000164093, ENSG00000164056, ENSG00000041982	694	54	16792	4.03266	0.999913	0.0347801	2.99348
GOTERM_BP_ALL	GO:0009791~post-embryonic development	12	1.40023	0.00167553	ENSG00000056586, ENSG00000182636, ENSG00000075223, ENSG00000169762, ENSG00000127152, ENSG00000168769, ENSG00000138834, ENSG00000104331, ENSG00000150347, ENSG00000171016, ENSG00000112294, ENSG00000171310	694	94	16792	3.08885	0.999954	0.0370128	3.19804
GOTERM_BP_ALL	GO:0040008~regulation of growth	44	5.13419	0.00167803	ENSG00000170242, ENSG00000179833, ENSG00000107821, ENSG00000169946, ENSG00000166949, ENSG00000080503, ENSG00000117707, ENSG00000100034, ENSG00000198563, ENSG00000092969, ENSG00000126778, ENSG00000130005, ENSG00000030304, ENSG00000075223, ENSG00000076356, ENSG00000067445, ENSG00000114861, ENSG00000123572, ENSG00000204217, ENSG00000104964, ENSG00000102678, ENSG00000129152, ENSG00000163513, ENSG0000…	694	652	16792	1.63286	0.999955	0.0369303	3.20274
GOTERM_BP_ALL	GO:0014037~Schwann cell differentiation	7	0.816803	0.00174817	ENSG00000063660, ENSG00000142208, ENSG00000122877, ENSG00000065361, ENSG00000196569, ENSG00000173039, ENSG00000172037	694	32	16792	5.29287	0.99997	0.038304	3.33447
GOTERM_BP_ALL	GO:0045137~development of primary sexual characteristics	20	2.33372	0.00177603	ENSG00000131759, ENSG00000084676, ENSG00000169946, ENSG00000138696, ENSG00000073614, ENSG00000121989, ENSG00000145147, ENSG00000185008, ENSG00000253293, ENSG00000005513, ENSG00000164093, ENSG00000154734, ENSG00000092969, ENSG00000180530, ENSG00000078399, ENSG00000100625, ENSG00000118689, ENSG00000102678, ENSG00000125875, ENSG00000150347	694	218	16792	2.21981	0.999975	0.0387608	3.38676
GOTERM_BP_ALL	GO:0002009~morphogenesis of an epithelium	37	4.31739	0.00179056	ENSG00000131759, ENSG00000105976, ENSG00000166949, ENSG00000197461, ENSG00000117707, ENSG00000157240, ENSG00000092969, ENSG00000126778, ENSG00000197603, ENSG00000075223, ENSG00000138802, ENSG00000124782, ENSG00000078246, ENSG00000133121, ENSG00000162337, ENSG00000041982, ENSG00000125931, ENSG00000163513, ENSG00000183691, ENSG00000170873, ENSG00000125812, ENSG00000074054, ENSG00000145147, ENSG0000…	694	521	16792	1.71833	0.999977	0.0389294	3.414
GOTERM_BP_ALL	GO:0033002~muscle cell proliferation	16	1.86698	0.00190514	ENSG00000163513, ENSG00000169946, ENSG00000183691, ENSG00000181744, ENSG00000198563, ENSG00000145349, ENSG00000145794, ENSG00000092969, ENSG00000126778, ENSG00000114861, ENSG00000142208, ENSG00000170962, ENSG00000145604, ENSG00000102678, ENSG00000096968, ENSG00000115461	694	155	16792	2.49765	0.999988	0.0412206	3.62866
GOTERM_BP_ALL	GO:0009725~response to hormone	54	6.30105	0.00192357	ENSG00000131759, ENSG00000160310, ENSG00000114166, ENSG00000171223, ENSG00000173039, ENSG00000118689, ENSG00000163513, ENSG00000005882, ENSG00000145675, ENSG00000164758, ENSG00000122877, ENSG00000145147, ENSG00000185008, ENSG00000163909, ENSG00000121879, ENSG00000012822, ENSG00000204406, ENSG00000010810, ENSG00000129596, ENSG00000142208, ENSG00000180530, ENSG00000115548, ENSG00000117586, ENSG0000…	694	854	16792	1.52996	0.99999	0.0414611	3.66316
GOTERM_BP_ALL	GO:0051726~regulation of cell cycle	60	7.00117	0.00203863	ENSG00000131759, ENSG00000170242, ENSG00000078142, ENSG00000107862, ENSG00000087074, ENSG00000160310, ENSG00000083750, ENSG00000198563, ENSG00000132275, ENSG00000114166, ENSG00000171223, ENSG00000101224, ENSG00000118495, ENSG00000162413, ENSG00000186787, ENSG00000058091, ENSG00000112659, ENSG00000099910, ENSG00000138764, ENSG00000164938, ENSG00000143878, ENSG00000145349, ENSG00000114315, ENSG0000…	694	976	16792	1.48746	0.999995	0.0437306	3.87819
GOTERM_BP_ALL	GO:0045596~negative regulation of cell differentiation	43	5.0175	0.00205388	ENSG00000131759, ENSG00000169946, ENSG00000168172, ENSG00000166949, ENSG00000184708, ENSG00000092969, ENSG00000145824, ENSG00000183688, ENSG00000178882, ENSG00000148516, ENSG00000075223, ENSG00000114861, ENSG00000078699, ENSG00000079102, ENSG00000078399, ENSG00000162337, ENSG00000026025, ENSG00000118689, ENSG00000141644, ENSG00000121210, ENSG00000125931, ENSG00000176749, ENSG00000145675, ENSG0000…	694	640	16792	1.62567	0.999995	0.0438928	3.90664
GOTERM_BP_ALL	GO:0003148~outflow tract septum morphogenesis	6	0.700117	0.00213697	ENSG00000163513, ENSG00000131759, ENSG00000169946, ENSG00000204217, ENSG00000197702, ENSG00000092969	694	23	16792	6.31199	0.999997	0.0454668	4.06161
GOTERM_BP_ALL	GO:0061626~pharyngeal arch artery morphogenesis	4	0.466744	0.00216242	ENSG00000183691, ENSG00000204217, ENSG00000114315, ENSG00000092969	694	7	16792	13.8263	0.999998	0.0458327	4.10901
GOTERM_BP_ALL	GO:0060322~head development	47	5.48425	0.00222022	ENSG00000131759, ENSG00000084676, ENSG00000183044, ENSG00000168172, ENSG00000117707, ENSG00000157240, ENSG00000092969, ENSG00000197603, ENSG00000159388, ENSG00000076356, ENSG00000138802, ENSG00000078246, ENSG00000204217, ENSG00000147862, ENSG00000058668, ENSG00000118689, ENSG00000102678, ENSG00000150347, ENSG00000120693, ENSG00000125931, ENSG00000163848, ENSG00000163513, ENSG00000176749, ENSG0000…	694	720	16792	1.57946	0.999998	0.0468635	4.21662
GOTERM_BP_ALL	GO:0035148~tube formation	15	1.75029	0.00223677	ENSG00000131759, ENSG00000168874, ENSG00000183691, ENSG00000157240, ENSG00000005513, ENSG00000092969, ENSG00000054282, ENSG00000126778, ENSG00000196576, ENSG00000113971, ENSG00000138802, ENSG00000078246, ENSG00000147862, ENSG00000100625, ENSG00000070193	694	142	16792	2.55591	0.999998	0.0470385	4.24741
GOTERM_BP_ALL	GO:0010717~regulation of epithelial to mesenchymal transition	10	1.16686	0.00225732	ENSG00000122694, ENSG00000163513, ENSG00000183691, ENSG00000197380, ENSG00000166949, ENSG00000116525, ENSG00000074054, ENSG00000044524, ENSG00000092969, ENSG00000144824	694	70	16792	3.45657	0.999999	0.0472941	4.28563
GOTERM_BP_ALL	GO:0018193~peptidyl-amino acid modification	70	8.16803	0.00226086	ENSG00000144057, ENSG00000105976, ENSG00000168769, ENSG00000113448, ENSG00000113240, ENSG00000105204, ENSG00000087074, ENSG00000100034, ENSG00000160310, ENSG00000183955, ENSG00000114166, ENSG00000010803, ENSG00000119760, ENSG00000116539, ENSG00000170854, ENSG00000214872, ENSG00000171016, ENSG00000163513, ENSG00000168283, ENSG00000153721, ENSG00000122877, ENSG00000115486, ENSG00000044524, ENSG0000…	694	1185	16792	1.4293	0.999999	0.0472008	4.29221
GOTERM_BP_ALL	GO:0030518~intracellular steroid hormone receptor signaling pathway	14	1.63361	0.00227345	ENSG00000108510, ENSG00000114861, ENSG00000084676, ENSG00000094631, ENSG00000164758, ENSG00000180530, ENSG00000100320, ENSG00000115548, ENSG00000145604, ENSG00000160310, ENSG00000163909, ENSG00000012822, ENSG00000139687, ENSG00000096968	694	127	16792	2.66727	0.999999	0.0472923	4.31562
GOTERM_BP_ALL	GO:0007010~cytoskeleton organization	68	7.93466	0.00229721	ENSG00000154310, ENSG00000168172, ENSG00000197461, ENSG00000100034, ENSG00000183688, ENSG00000178882, ENSG00000182923, ENSG00000107771, ENSG00000121957, ENSG00000006607, ENSG00000171992, ENSG00000099864, ENSG00000115935, ENSG00000176438, ENSG00000145675, ENSG00000112659, ENSG00000130787, ENSG00000044524, ENSG00000145147, ENSG00000137478, ENSG00000159713, ENSG00000183386, ENSG00000100503, ENSG0000…	694	1144	16792	1.43822	0.999999	0.0476091	4.35977
GOTERM_BP_ALL	GO:0007507~heart development	36	4.2007	0.00231385	ENSG00000131759, ENSG00000169946, ENSG00000166949, ENSG00000117707, ENSG00000157240, ENSG00000181744, ENSG00000198563, ENSG00000203867, ENSG00000154734, ENSG00000092969, ENSG00000126778, ENSG00000197603, ENSG00000075223, ENSG00000138802, ENSG00000114861, ENSG00000204217, ENSG00000127418, ENSG00000141644, ENSG00000102678, ENSG00000163513, ENSG00000183691, ENSG00000124006, ENSG00000065361, ENSG0000…	694	511	16792	1.70461	0.999999	0.0477801	4.39068
GOTERM_BP_ALL	GO:0007166~cell surface receptor signaling pathway	139	16.2194	0.00233652	ENSG00000126070, ENSG00000154310, ENSG00000204498, ENSG00000152990, ENSG00000105976, ENSG00000084636, ENSG00000113448, ENSG00000197461, ENSG00000114166, ENSG00000243646, ENSG00000112837, ENSG00000113441, ENSG00000173039, ENSG00000196814, ENSG00000158079, ENSG00000064655, ENSG00000170962, ENSG00000078699, ENSG00000204217, ENSG00000118689, ENSG00000076641, ENSG00000011105, ENSG00000150347, ENSG0000…	694	2669	16792	1.26011	0.999999	0.0480711	4.43279
GOTERM_BP_ALL	GO:0044093~positive regulation of molecular function	101	11.7853	0.00236183	ENSG00000131759, ENSG00000084070, ENSG00000154310, ENSG00000197461, ENSG00000103227, ENSG00000067208, ENSG00000087074, ENSG00000139436, ENSG00000173039, ENSG00000181085, ENSG00000170962, ENSG00000196914, ENSG00000150347, ENSG00000174373, ENSG00000163513, ENSG00000168283, ENSG00000187486, ENSG00000145349, ENSG00000165092, ENSG00000012174, ENSG00000160867, ENSG00000100485, ENSG00000133612, ENSG0000…	694	1840	16792	1.32815	0.999999	0.0484126	4.47976
GOTERM_BP_ALL	GO:0045666~positive regulation of neuron differentiation	25	2.91715	0.00241126	ENSG00000131759, ENSG00000153707, ENSG00000084676, ENSG00000117707, ENSG00000148516, ENSG00000181754, ENSG00000078699, ENSG00000204217, ENSG00000099864, ENSG00000140262, ENSG00000124006, ENSG00000103319, ENSG00000044524, ENSG00000145147, ENSG00000185008, ENSG00000163909, ENSG00000196576, ENSG00000010810, ENSG00000196628, ENSG00000174989, ENSG00000049759, ENSG00000147852, ENSG00000138834, ENSG0000…	694	310	16792	1.95129	0.999999	0.0492326	4.57146
GOTERM_BP_ALL	GO:0030902~hindbrain development	15	1.75029	0.00271609	ENSG00000084676, ENSG00000176749, ENSG00000183691, ENSG00000183044, ENSG00000188613, ENSG00000122877, ENSG00000117707, ENSG00000114315, ENSG00000197603, ENSG00000076356, ENSG00000138802, ENSG00000165240, ENSG00000147862, ENSG00000100320, ENSG00000120693	694	145	16792	2.50303	1	0.0551017	5.13505
GOTERM_BP_ALL	GO:0071599~otic vesicle development	5	0.583431	0.00272705	ENSG00000117707, ENSG00000104313, ENSG00000139219, ENSG00000070193, ENSG00000126778	694	15	16792	8.06532	1	0.0551309	5.15527
GOTERM_BP_ALL	GO:0060419~heart growth	10	1.16686	0.00274679	ENSG00000163513, ENSG00000114861, ENSG00000169946, ENSG00000183691, ENSG00000117707, ENSG00000181744, ENSG00000198563, ENSG00000145349, ENSG00000102678, ENSG00000092969	694	72	16792	3.36055	1	0.0553317	5.19164
GOTERM_BP_ALL	GO:0007416~synapse assembly	14	1.63361	0.0027949	ENSG00000030304, ENSG00000112852, ENSG00000153707, ENSG00000179542, ENSG00000182580, ENSG00000107742, ENSG00000181754, ENSG00000103319, ENSG00000173114, ENSG00000157240, ENSG00000100625, ENSG00000185008, ENSG00000150471, ENSG00000126778	694	130	16792	2.60572	1	0.0560853	5.28025
GOTERM_BP_ALL	GO:0042127~regulation of cell proliferation	87	10.1517	0.00281476	ENSG00000131759, ENSG00000126070, ENSG00000169946, ENSG00000138696, ENSG00000080503, ENSG00000197461, ENSG00000198563, ENSG00000114166, ENSG00000171223, ENSG00000126778, ENSG00000173039, ENSG00000124782, ENSG00000083642, ENSG00000170962, ENSG00000179388, ENSG00000204217, ENSG00000147862, ENSG00000127418, ENSG00000101224, ENSG00000118689, ENSG00000121210, ENSG00000182636, ENSG00000163513, ENSG0000…	694	1552	16792	1.35635	1	0.0562837	5.31681
GOTERM_BP_ALL	GO:2000826~regulation of heart morphogenesis	7	0.816803	0.00281963	ENSG00000163513, ENSG00000183691, ENSG00000204217, ENSG00000104313, ENSG00000114315, ENSG00000092969, ENSG00000126778	694	35	16792	4.83919	1	0.0561903	5.32578
GOTERM_BP_ALL	GO:0001763~morphogenesis of a branching structure	18	2.10035	0.00301498	ENSG00000125931, ENSG00000163513, ENSG00000183691, ENSG00000105976, ENSG00000125812, ENSG00000117707, ENSG00000197461, ENSG00000145147, ENSG00000005513, ENSG00000164093, ENSG00000126778, ENSG00000075223, ENSG00000100625, ENSG00000162337, ENSG00000104313, ENSG00000070193, ENSG00000164056, ENSG00000041982	694	195	16792	2.23347	1	0.0597708	5.68462
GOTERM_BP_ALL	GO:0060348~bone development	17	1.98366	0.00307964	ENSG00000131759, ENSG00000163513, ENSG00000138696, ENSG00000169762, ENSG00000164093, ENSG00000183688, ENSG00000178882, ENSG00000114861, ENSG00000145431, ENSG00000171456, ENSG00000078246, ENSG00000204217, ENSG00000162337, ENSG00000183160, ENSG00000139219, ENSG00000104331, ENSG00000120693	694	179	16792	2.29794	1	0.0608129	5.80311
GOTERM_BP_ALL	GO:0048754~branching morphogenesis of an epithelial tube	15	1.75029	0.00308025	ENSG00000125931, ENSG00000163513, ENSG00000105976, ENSG00000183691, ENSG00000125812, ENSG00000145147, ENSG00000005513, ENSG00000164093, ENSG00000126778, ENSG00000100625, ENSG00000162337, ENSG00000104313, ENSG00000070193, ENSG00000164056, ENSG00000041982	694	147	16792	2.46898	1	0.060624	5.80421
GOTERM_BP_ALL	GO:0032870~cellular response to hormone stimulus	41	4.78413	0.00316759	ENSG00000131759, ENSG00000084676, ENSG00000167244, ENSG00000160310, ENSG00000204231, ENSG00000114166, ENSG00000171223, ENSG00000173039, ENSG00000151422, ENSG00000114861, ENSG00000145604, ENSG00000118689, ENSG00000129152, ENSG00000096968, ENSG00000041982, ENSG00000108510, ENSG00000005882, ENSG00000123358, ENSG00000145675, ENSG00000220205, ENSG00000164758, ENSG00000103319, ENSG00000143171, ENSG0000…	694	616	16792	1.61045	1	0.0620865	5.96404
GOTERM_BP_ALL	GO:0009987~cellular process	661	77.1295	0.00322506	ENSG00000131759, ENSG00000126070, ENSG00000183496, ENSG00000169946, ENSG00000078142, ENSG00000113448, ENSG00000113240, ENSG00000185019, ENSG00000103227, ENSG00000144227, ENSG00000067208, ENSG00000087074, ENSG00000171223, ENSG00000166439, ENSG00000126778, ENSG00000183688, ENSG00000113441, ENSG00000182923, ENSG00000121957, ENSG00000181085, ENSG00000204524, ENSG00000136878, ENSG00000196998, ENSG0000…	694	15558	16792	1.02799	1	0.0629719	6.06907
GOTERM_BP_ALL	GO:0048585~negative regulation of response to stimulus	78	9.10152	0.0032411	ENSG00000170242, ENSG00000204498, ENSG00000105976, ENSG00000197461, ENSG00000087074, ENSG00000198563, ENSG00000125388, ENSG00000166439, ENSG00000112837, ENSG00000173039, ENSG00000064655, ENSG00000078246, ENSG00000078699, ENSG00000165233, ENSG00000118689, ENSG00000099864, ENSG00000116539, ENSG00000121210, ENSG00000163513, ENSG00000213366, ENSG00000100234, ENSG00000183691, ENSG00000153721, ENSG0000…	694	1369	16792	1.37859	1	0.0630693	6.09837
GOTERM_BP_ALL	GO:0010770~positive regulation of cell morphogenesis involved in differentiation	16	1.86698	0.00329185	ENSG00000122694, ENSG00000163513, ENSG00000153707, ENSG00000102606, ENSG00000124006, ENSG00000103319, ENSG00000166949, ENSG00000145147, ENSG00000185008, ENSG00000092969, ENSG00000196576, ENSG00000174989, ENSG00000124782, ENSG00000181754, ENSG00000204217, ENSG00000018189	694	164	16792	2.36058	1	0.0638182	6.19098
GOTERM_BP_ALL	GO:0050808~synapse organization	20	2.33372	0.00340382	ENSG00000153707, ENSG00000112852, ENSG00000107742, ENSG00000103319, ENSG00000109738, ENSG00000157240, ENSG00000185008, ENSG00000121440, ENSG00000150471, ENSG00000126778, ENSG00000172037, ENSG00000030304, ENSG00000179542, ENSG00000182580, ENSG00000165917, ENSG00000181754, ENSG00000100625, ENSG00000173114, ENSG00000099864, ENSG00000041982	694	231	16792	2.09489	1	0.0657063	6.39503
GOTERM_BP_ALL	GO:0071840~cellular component organization or biogenesis	294	34.3057	0.00341112	ENSG00000126070, ENSG00000107821, ENSG00000154310, ENSG00000078142, ENSG00000084636, ENSG00000197461, ENSG00000067208, ENSG00000107130, ENSG00000114166, ENSG00000183688, ENSG00000126778, ENSG00000182923, ENSG00000113441, ENSG00000121957, ENSG00000181085, ENSG00000078699, ENSG00000196998, ENSG00000141644, ENSG00000116539, ENSG00000168283, ENSG00000145675, ENSG00000183691, ENSG00000164938, ENSG0000…	694	6265	16792	1.13545	1	0.0656305	6.40831
GOTERM_BP_ALL	GO:0045995~regulation of embryonic development	13	1.51692	0.00348411	ENSG00000113971, ENSG00000138802, ENSG00000123572, ENSG00000078246, ENSG00000074054, ENSG00000157240, ENSG00000100625, ENSG00000114315, ENSG00000137764, ENSG00000196569, ENSG00000126778, ENSG00000112837, ENSG00000144824	694	118	16792	2.66566	1	0.0667743	6.5411
GOTERM_BP_ALL	GO:0048729~tissue morphogenesis	41	4.78413	0.00377223	ENSG00000131759, ENSG00000169946, ENSG00000105976, ENSG00000166949, ENSG00000197461, ENSG00000117707, ENSG00000157240, ENSG00000092969, ENSG00000126778, ENSG00000197603, ENSG00000075223, ENSG00000138802, ENSG00000124782, ENSG00000064655, ENSG00000078246, ENSG00000204217, ENSG00000133121, ENSG00000162337, ENSG00000041982, ENSG00000125931, ENSG00000163513, ENSG00000183691, ENSG00000170873, ENSG0000…	694	622	16792	1.59491	1	0.0718725	7.06345
GOTERM_BP_ALL	GO:0065009~regulation of molecular function	146	17.0362	0.00398232	ENSG00000084070, ENSG00000131759, ENSG00000204498, ENSG00000154310, ENSG00000113448, ENSG00000197461, ENSG00000103227, ENSG00000087074, ENSG00000067208, ENSG00000139436, ENSG00000160310, ENSG00000114166, ENSG00000173039, ENSG00000181085, ENSG00000121957, ENSG00000170962, ENSG00000196914, ENSG00000150347, ENSG00000174373, ENSG00000168283, ENSG00000163513, ENSG00000145675, ENSG00000183691, ENSG0000…	694	2863	16792	1.23388	1	0.0754873	7.44259
GOTERM_BP_ALL	GO:2001237~negative regulation of extrinsic apoptotic signaling pathway	12	1.40023	0.00402579	ENSG00000010810, ENSG00000116584, ENSG00000015171, ENSG00000064655, ENSG00000135439, ENSG00000142208, ENSG00000112319, ENSG00000104313, ENSG00000139219, ENSG00000137764, ENSG00000070193, ENSG00000173039	694	105	16792	2.76525	1	0.0760396	7.52086
GOTERM_BP_ALL	GO:0007420~brain development	44	5.13419	0.00409727	ENSG00000131759, ENSG00000084676, ENSG00000183044, ENSG00000168172, ENSG00000117707, ENSG00000157240, ENSG00000197603, ENSG00000159388, ENSG00000076356, ENSG00000138802, ENSG00000078246, ENSG00000204217, ENSG00000147862, ENSG00000058668, ENSG00000118689, ENSG00000102678, ENSG00000120693, ENSG00000125931, ENSG00000163848, ENSG00000163513, ENSG00000176749, ENSG00000183691, ENSG00000188613, ENSG0000…	694	684	16792	1.55647	1	0.0770952	7.64941
GOTERM_BP_ALL	GO:0071774~response to fibroblast growth factor	14	1.63361	0.00413123	ENSG00000063660, ENSG00000123358, ENSG00000183691, ENSG00000160888, ENSG00000160867, ENSG00000179388, ENSG00000100320, ENSG00000127418, ENSG00000089177, ENSG00000137218, ENSG00000102678, ENSG00000070193, ENSG00000164056, ENSG00000041982	694	136	16792	2.49076	1	0.077466	7.71042
GOTERM_BP_ALL	GO:0008584~male gonad development	14	1.63361	0.00413123	ENSG00000131759, ENSG00000084676, ENSG00000169946, ENSG00000073614, ENSG00000121989, ENSG00000005513, ENSG00000253293, ENSG00000164093, ENSG00000092969, ENSG00000078399, ENSG00000100625, ENSG00000102678, ENSG00000150347, ENSG00000125875	694	136	16792	2.49076	1	0.077466	7.71042
GOTERM_BP_ALL	GO:0046546~development of primary male sexual characteristics	14	1.63361	0.00413123	ENSG00000131759, ENSG00000084676, ENSG00000169946, ENSG00000073614, ENSG00000121989, ENSG00000005513, ENSG00000253293, ENSG00000164093, ENSG00000092969, ENSG00000078399, ENSG00000100625, ENSG00000102678, ENSG00000150347, ENSG00000125875	694	136	16792	2.49076	1	0.077466	7.71042
GOTERM_BP_ALL	GO:0014070~response to organic cyclic compound	55	6.41774	0.00426202	ENSG00000131759, ENSG00000126070, ENSG00000168769, ENSG00000113448, ENSG00000160310, ENSG00000171223, ENSG00000173039, ENSG00000141644, ENSG00000118689, ENSG00000163513, ENSG00000213366, ENSG00000164758, ENSG00000145147, ENSG00000187486, ENSG00000150471, ENSG00000163909, ENSG00000012822, ENSG00000138814, ENSG00000129596, ENSG00000142208, ENSG00000160867, ENSG00000180530, ENSG00000167720, ENSG0000…	694	906	16792	1.46885	1	0.0795736	7.94506
GOTERM_BP_ALL	GO:0016569~covalent chromatin modification	37	4.31739	0.00435045	ENSG00000173011, ENSG00000084676, ENSG00000083168, ENSG00000168769, ENSG00000100034, ENSG00000183955, ENSG00000160310, ENSG00000132275, ENSG00000114166, ENSG00000015171, ENSG00000064655, ENSG00000119760, ENSG00000141644, ENSG00000116539, ENSG00000150347, ENSG00000129152, ENSG00000096968, ENSG00000171016, ENSG00000168283, ENSG00000073614, ENSG00000141582, ENSG00000145349, ENSG00000120616, ENSG0000…	694	550	16792	1.62773	1	0.0809067	8.10339
GOTERM_BP_ALL	GO:0061323~cell proliferation involved in heart morphogenesis	5	0.583431	0.00445269	ENSG00000204217, ENSG00000104313, ENSG00000114315, ENSG00000164093, ENSG00000126778	694	17	16792	7.11646	1	0.082475	8.28613
GOTERM_BP_ALL	GO:0008283~cell proliferation	100	11.6686	0.00462867	ENSG00000131759, ENSG00000126070, ENSG00000169946, ENSG00000105976, ENSG00000080503, ENSG00000197461, ENSG00000067208, ENSG00000114166, ENSG00000171223, ENSG00000126778, ENSG00000173039, ENSG00000124782, ENSG00000170962, ENSG00000083642, ENSG00000204217, ENSG00000118689, ENSG00000121210, ENSG00000163513, ENSG00000168283, ENSG00000183691, ENSG00000163512, ENSG00000164938, ENSG00000145349, ENSG0000…	694	1861	16792	1.30016	1	0.0853341	8.59984
GOTERM_BP_ALL	GO:0072006~nephron development	14	1.63361	0.00467688	ENSG00000125931, ENSG00000183691, ENSG00000125812, ENSG00000170873, ENSG00000197461, ENSG00000114315, ENSG00000005513, ENSG00000163909, ENSG00000126778, ENSG00000172037, ENSG00000170962, ENSG00000100625, ENSG00000104313, ENSG00000120738	694	138	16792	2.45466	1	0.0859206	8.68561
GOTERM_BP_ALL	GO:0043542~endothelial cell migration	15	1.75029	0.00468249	ENSG00000173482, ENSG00000168874, ENSG00000123358, ENSG00000105976, ENSG00000117707, ENSG00000145147, ENSG00000143878, ENSG00000106211, ENSG00000121879, ENSG00000114861, ENSG00000142208, ENSG00000204217, ENSG00000179388, ENSG00000133121, ENSG00000137764	694	154	16792	2.35675	1	0.0857559	8.69559
GOTERM_BP_ALL	GO:0051402~neuron apoptotic process	18	2.10035	0.00476995	ENSG00000125931, ENSG00000176749, ENSG00000065361, ENSG00000135250, ENSG00000173511, ENSG00000121879, ENSG00000092969, ENSG00000126778, ENSG00000159388, ENSG00000010810, ENSG00000165917, ENSG00000135439, ENSG00000100625, ENSG00000118689, ENSG00000125952, ENSG00000139687, ENSG00000174405, ENSG00000096968	694	204	16792	2.13494	1	0.0870228	8.85096
GOTERM_BP_ALL	GO:0044700~single organism signaling	290	33.839	0.00490138	ENSG00000131759, ENSG00000126070, ENSG00000154310, ENSG00000078142, ENSG00000084636, ENSG00000113448, ENSG00000197461, ENSG00000144227, ENSG00000087074, ENSG00000107130, ENSG00000114166, ENSG00000182923, ENSG00000113441, ENSG00000121957, ENSG00000181085, ENSG00000136878, ENSG00000078699, ENSG00000118495, ENSG00000076641, ENSG00000116539, ENSG00000121210, ENSG00000147145, ENSG00000145675, ENSG0000…	694	6207	16792	1.13047	1	0.0890446	9.084
GOTERM_BP_ALL	GO:0090184~positive regulation of kidney development	7	0.816803	0.00493038	ENSG00000170962, ENSG00000183691, ENSG00000197461, ENSG00000100625, ENSG00000005513, ENSG00000126778, ENSG00000120738	694	39	16792	4.34287	1	0.0892772	9.13534
GOTERM_BP_ALL	GO:0050673~epithelial cell proliferation	26	3.03384	0.00505199	ENSG00000173482, ENSG00000117707, ENSG00000121989, ENSG00000143437, ENSG00000092969, ENSG00000101940, ENSG00000114861, ENSG00000124782, ENSG00000129757, ENSG00000204217, ENSG00000179388, ENSG00000147862, ENSG00000102678, ENSG00000168874, ENSG00000123358, ENSG00000183691, ENSG00000170873, ENSG00000173511, ENSG00000142208, ENSG00000135439, ENSG00000127152, ENSG00000104313, ENSG00000070193, ENSG0000…	694	347	16792	1.81295	1	0.0911052	9.35033
GOTERM_BP_ALL	GO:0014068~positive regulation of phosphatidylinositol 3-kinase signaling	9	1.05018	0.00511565	ENSG00000010810, ENSG00000145431, ENSG00000170962, ENSG00000135439, ENSG00000186654, ENSG00000065361, ENSG00000197461, ENSG00000092969, ENSG00000096968	694	65	16792	3.35021	1	0.0919243	9.46268
GOTERM_BP_ALL	GO:0023052~signaling	292	34.0723	0.00517536	ENSG00000131759, ENSG00000126070, ENSG00000154310, ENSG00000078142, ENSG00000084636, ENSG00000113448, ENSG00000197461, ENSG00000144227, ENSG00000087074, ENSG00000107130, ENSG00000114166, ENSG00000182923, ENSG00000113441, ENSG00000121957, ENSG00000181085, ENSG00000136878, ENSG00000078699, ENSG00000118495, ENSG00000076641, ENSG00000116539, ENSG00000121210, ENSG00000147145, ENSG00000145675, ENSG0000…	694	6260	16792	1.12863	1	0.0926701	9.56795
GOTERM_BP_ALL	GO:0014855~striated muscle cell proliferation	8	0.933489	0.00525981	ENSG00000163513, ENSG00000169946, ENSG00000183691, ENSG00000181744, ENSG00000102678, ENSG00000092969, ENSG00000145794, ENSG00000126778	694	52	16792	3.72246	1	0.0938318	9.71661
GOTERM_BP_ALL	GO:0002053~positive regulation of mesenchymal cell proliferation	6	0.700117	0.00526524	ENSG00000163513, ENSG00000114861, ENSG00000197461, ENSG00000162337, ENSG00000102678, ENSG00000126778	694	28	16792	5.18485	1	0.0936449	9.72616
GOTERM_BP_ALL	GO:0008045~motor neuron axon guidance	6	0.700117	0.00526524	ENSG00000076356, ENSG00000114861, ENSG00000183691, ENSG00000122877, ENSG00000145147, ENSG00000141622	694	28	16792	5.18485	1	0.0936449	9.72616
GOTERM_BP_ALL	GO:0046854~phosphatidylinositol phosphorylation	11	1.28355	0.00535483	ENSG00000010810, ENSG00000145675, ENSG00000078142, ENSG00000160867, ENSG00000065361, ENSG00000197461, ENSG00000104331, ENSG00000102678, ENSG00000143393, ENSG00000070193, ENSG00000121879	694	94	16792	2.83144	1	0.0948821	9.88362
GOTERM_BP_ALL	GO:0071383~cellular response to steroid hormone stimulus	20	2.33372	0.00537832	ENSG00000108510, ENSG00000131759, ENSG00000084676, ENSG00000123358, ENSG00000164758, ENSG00000143171, ENSG00000160310, ENSG00000204231, ENSG00000163909, ENSG00000012822, ENSG00000094631, ENSG00000114861, ENSG00000180530, ENSG00000100320, ENSG00000115548, ENSG00000145604, ENSG00000118689, ENSG00000129152, ENSG00000139687, ENSG00000096968	694	241	16792	2.00796	1	0.0949976	9.92486
GOTERM_BP_ALL	GO:0003006~developmental process involved in reproduction	41	4.78413	0.00541279	ENSG00000131759, ENSG00000084676, ENSG00000169946, ENSG00000138696, ENSG00000080503, ENSG00000121989, ENSG00000143437, ENSG00000154734, ENSG00000171223, ENSG00000092969, ENSG00000242265, ENSG00000123572, ENSG00000129757, ENSG00000204217, ENSG00000078399, ENSG00000101224, ENSG00000118689, ENSG00000102678, ENSG00000150347, ENSG00000171016, ENSG00000041982, ENSG00000125931, ENSG00000072364, ENSG0000…	694	636	16792	1.5598	1	0.0952966	9.98536
GOTERM_BP_ALL	GO:1905276~regulation of epithelial tube formation	5	0.583431	0.00554042	ENSG00000113971, ENSG00000138802, ENSG00000157240, ENSG00000100625, ENSG00000126778	694	18	16792	6.7211	1	0.0971508	10.209
GOTERM_BP_ALL	GO:0051963~regulation of synapse assembly	10	1.16686	0.00559707	ENSG00000030304, ENSG00000179542, ENSG00000182580, ENSG00000181754, ENSG00000103319, ENSG00000173114, ENSG00000100625, ENSG00000185008, ENSG00000150471, ENSG00000126778	694	80	16792	3.0245	1	0.0978098	10.3081
GOTERM_BP_ALL	GO:0007017~microtubule-based process	40	4.66744	0.00567676	ENSG00000048471, ENSG00000135837, ENSG00000168172, ENSG00000175582, ENSG00000151422, ENSG00000182923, ENSG00000107771, ENSG00000121957, ENSG00000089177, ENSG00000102781, ENSG00000169515, ENSG00000116717, ENSG00000176749, ENSG00000124006, ENSG00000112659, ENSG00000074054, ENSG00000044524, ENSG00000170390, ENSG00000115561, ENSG00000159713, ENSG00000054282, ENSG00000075945, ENSG00000113971, ENSG0000…	694	618	16792	1.56608	1	0.0988463	10.4473
GOTERM_BP_ALL	GO:0006468~protein phosphorylation	99	11.5519	0.00568521	ENSG00000131759, ENSG00000154310, ENSG00000183496, ENSG00000105976, ENSG00000078142, ENSG00000113448, ENSG00000197461, ENSG00000113240, ENSG00000087074, ENSG00000114166, ENSG00000181085, ENSG00000170962, ENSG00000073331, ENSG00000204217, ENSG00000116539, ENSG00000214872, ENSG00000163513, ENSG00000145675, ENSG00000183691, ENSG00000044524, ENSG00000145147, ENSG00000145349, ENSG00000152642, ENSG0000…	694	1852	16792	1.29341	1	0.098699	10.462
GOTERM_BP_ALL	GO:0046661~male sex differentiation	15	1.75029	0.00586505	ENSG00000131759, ENSG00000084676, ENSG00000169946, ENSG00000073614, ENSG00000121989, ENSG00000005513, ENSG00000253293, ENSG00000164093, ENSG00000092969, ENSG00000078399, ENSG00000100625, ENSG00000102678, ENSG00000070193, ENSG00000150347, ENSG00000125875	694	158	16792	2.29709	1	0.101372	10.7754
GOTERM_BP_ALL	GO:0007154~cell communication	292	34.0723	0.0059718	ENSG00000131759, ENSG00000126070, ENSG00000154310, ENSG00000078142, ENSG00000084636, ENSG00000113448, ENSG00000197461, ENSG00000144227, ENSG00000087074, ENSG00000107130, ENSG00000114166, ENSG00000182923, ENSG00000113441, ENSG00000121957, ENSG00000181085, ENSG00000136878, ENSG00000078699, ENSG00000118495, ENSG00000076641, ENSG00000116539, ENSG00000121210, ENSG00000147145, ENSG00000145675, ENSG0000…	694	6275	16792	1.12593	1	0.102827	10.9609
GOTERM_BP_ALL	GO:0031109~microtubule polymerization or depolymerization	10	1.16686	0.00607269	ENSG00000100503, ENSG00000094631, ENSG00000116584, ENSG00000167566, ENSG00000127914, ENSG00000074054, ENSG00000134982, ENSG00000101871, ENSG00000159713, ENSG00000198718	694	81	16792	2.98716	1	0.104176	11.1359
GOTERM_BP_ALL	GO:0006915~apoptotic process	94	10.9685	0.00609111	ENSG00000138449, ENSG00000131759, ENSG00000170242, ENSG00000138696, ENSG00000100034, ENSG00000087074, ENSG00000156113, ENSG00000160310, ENSG00000132275, ENSG00000197043, ENSG00000126778, ENSG00000173039, ENSG00000064655, ENSG00000163947, ENSG00000179388, ENSG00000204217, ENSG00000136936, ENSG00000118689, ENSG00000118495, ENSG00000196914, ENSG00000186787, ENSG00000163513, ENSG00000005882, ENSG0000…	694	1747	16792	1.3019	1	0.104177	11.1678
GOTERM_BP_ALL	GO:0035909~aorta morphogenesis	6	0.700117	0.00615009	ENSG00000138802, ENSG00000117707, ENSG00000104313, ENSG00000114315, ENSG00000092969, ENSG00000126778	694	29	16792	5.00606	1	0.104834	11.2699
GOTERM_BP_ALL	GO:0055017~cardiac muscle tissue growth	9	1.05018	0.00615324	ENSG00000163513, ENSG00000114861, ENSG00000169946, ENSG00000183691, ENSG00000181744, ENSG00000198563, ENSG00000145349, ENSG00000102678, ENSG00000092969	694	67	16792	3.2502	1	0.104587	11.2754
GOTERM_BP_ALL	GO:0033043~regulation of organelle organization	66	7.70128	0.0061997	ENSG00000197461, ENSG00000100034, ENSG00000067208, ENSG00000109680, ENSG00000181085, ENSG00000196526, ENSG00000171992, ENSG00000141279, ENSG00000169221, ENSG00000171016, ENSG00000115935, ENSG00000145675, ENSG00000119778, ENSG00000112659, ENSG00000073614, ENSG00000139722, ENSG00000130787, ENSG00000044524, ENSG00000145147, ENSG00000099910, ENSG00000137478, ENSG00000145349, ENSG00000114315, ENSG0000…	694	1152	16792	1.38623	1	0.105038	11.3558
GOTERM_BP_ALL	GO:0043200~response to amino acid	11	1.28355	0.00620982	ENSG00000145431, ENSG00000129596, ENSG00000170962, ENSG00000078142, ENSG00000084636, ENSG00000109738, ENSG00000025039, ENSG00000083750, ENSG00000149212, ENSG00000173039, ENSG00000148516	694	96	16792	2.77245	1	0.104903	11.3733
GOTERM_BP_ALL	GO:0009968~negative regulation of signal transduction	63	7.35123	0.00621918	ENSG00000170242, ENSG00000204498, ENSG00000087074, ENSG00000125388, ENSG00000112837, ENSG00000173039, ENSG00000078246, ENSG00000064655, ENSG00000078699, ENSG00000165233, ENSG00000118689, ENSG00000116539, ENSG00000099864, ENSG00000121210, ENSG00000163513, ENSG00000213366, ENSG00000100234, ENSG00000183691, ENSG00000153721, ENSG00000197380, ENSG00000145147, ENSG00000163909, ENSG00000152642, ENSG0000…	694	1089	16792	1.39977	1	0.104758	11.3894
GOTERM_BP_ALL	GO:0060428~lung epithelium development	7	0.816803	0.00633874	ENSG00000121957, ENSG00000114861, ENSG00000127528, ENSG00000137497, ENSG00000147862, ENSG00000104313, ENSG00000070193	694	41	16792	4.13102	1	0.106367	11.5958
GOTERM_BP_ALL	GO:0007528~neuromuscular junction development	7	0.816803	0.00633874	ENSG00000030304, ENSG00000165917, ENSG00000100625, ENSG00000121440, ENSG00000126778, ENSG00000041982, ENSG00000172037	694	41	16792	4.13102	1	0.106367	11.5958
GOTERM_BP_ALL	GO:0090183~regulation of kidney development	8	0.933489	0.00648751	ENSG00000125931, ENSG00000170962, ENSG00000183691, ENSG00000197461, ENSG00000100625, ENSG00000005513, ENSG00000126778, ENSG00000120738	694	54	16792	3.58459	1	0.108427	11.852
GOTERM_BP_ALL	GO:0048813~dendrite morphogenesis	11	1.28355	0.00667531	ENSG00000010810, ENSG00000153707, ENSG00000138814, ENSG00000182580, ENSG00000094631, ENSG00000174989, ENSG00000176749, ENSG00000124006, ENSG00000147852, ENSG00000103319, ENSG00000100320	694	97	16792	2.74387	1	0.111084	12.1744
GOTERM_BP_ALL	GO:0030326~embryonic limb morphogenesis	13	1.51692	0.00668745	ENSG00000144320, ENSG00000183691, ENSG00000253293, ENSG00000164093, ENSG00000092969, ENSG00000128709, ENSG00000197603, ENSG00000078246, ENSG00000078399, ENSG00000162337, ENSG00000102678, ENSG00000104331, ENSG00000171310	694	128	16792	2.4574	1	0.110967	12.1952
GOTERM_BP_ALL	GO:0035113~embryonic appendage morphogenesis	13	1.51692	0.00668745	ENSG00000144320, ENSG00000183691, ENSG00000253293, ENSG00000164093, ENSG00000092969, ENSG00000128709, ENSG00000197603, ENSG00000078246, ENSG00000078399, ENSG00000162337, ENSG00000102678, ENSG00000104331, ENSG00000171310	694	128	16792	2.4574	1	0.110967	12.1952
GOTERM_BP_ALL	GO:0043067~regulation of programmed cell death	78	9.10152	0.00674777	ENSG00000138449, ENSG00000131759, ENSG00000170242, ENSG00000105976, ENSG00000138696, ENSG00000156113, ENSG00000100034, ENSG00000160310, ENSG00000126778, ENSG00000173039, ENSG00000064655, ENSG00000163947, ENSG00000179388, ENSG00000118689, ENSG00000196914, ENSG00000145675, ENSG00000100234, ENSG00000183691, ENSG00000130787, ENSG00000145147, ENSG00000164938, ENSG00000143878, ENSG00000145349, ENSG0000…	694	1413	16792	1.33566	1	0.111604	12.2985
GOTERM_BP_ALL	GO:0003149~membranous septum morphogenesis	4	0.466744	0.00675611	ENSG00000163513, ENSG00000183691, ENSG00000157240, ENSG00000092969	694	10	16792	9.67839	1	0.111426	12.3128
GOTERM_BP_ALL	GO:0060174~limb bud formation	4	0.466744	0.00675611	ENSG00000076356, ENSG00000075223, ENSG00000139219, ENSG00000070193	694	10	16792	9.67839	1	0.111426	12.3128
GOTERM_BP_ALL	GO:0007026~negative regulation of microtubule depolymerization	5	0.583431	0.00679207	ENSG00000094631, ENSG00000116584, ENSG00000074054, ENSG00000134982, ENSG00000101871	694	19	16792	6.36736	1	0.111679	12.3743
GOTERM_BP_ALL	GO:2001236~regulation of extrinsic apoptotic signaling pathway	15	1.75029	0.00690034	ENSG00000100234, ENSG00000138696, ENSG00000092969, ENSG00000173039, ENSG00000010810, ENSG00000116584, ENSG00000015171, ENSG00000135439, ENSG00000142208, ENSG00000064655, ENSG00000112319, ENSG00000104313, ENSG00000139219, ENSG00000070193, ENSG00000137764	694	161	16792	2.25428	1	0.11305	12.5593
GOTERM_BP_ALL	GO:0050679~positive regulation of epithelial cell proliferation	15	1.75029	0.00690034	ENSG00000123358, ENSG00000183691, ENSG00000117707, ENSG00000173511, ENSG00000143437, ENSG00000114861, ENSG00000124782, ENSG00000142208, ENSG00000135439, ENSG00000204217, ENSG00000179388, ENSG00000104313, ENSG00000102678, ENSG00000070193, ENSG00000137764	694	161	16792	2.25428	1	0.11305	12.5593
GOTERM_BP_ALL	GO:0090092~regulation of transmembrane receptor protein serine/threonine kinase signaling pathway	18	2.10035	0.00696166	ENSG00000125931, ENSG00000163513, ENSG00000183691, ENSG00000166949, ENSG00000121989, ENSG00000157240, ENSG00000114315, ENSG00000092969, ENSG00000148516, ENSG00000242265, ENSG00000129757, ENSG00000204217, ENSG00000102678, ENSG00000070193, ENSG00000141622, ENSG00000180875, ENSG00000165617, ENSG00000171310	694	212	16792	2.05437	1	0.113688	12.6638
GOTERM_BP_ALL	GO:0048762~mesenchymal cell differentiation	16	1.86698	0.00701043	ENSG00000122694, ENSG00000163513, ENSG00000169762, ENSG00000183691, ENSG00000197380, ENSG00000166949, ENSG00000114315, ENSG00000124205, ENSG00000005513, ENSG00000164093, ENSG00000163909, ENSG00000092969, ENSG00000183688, ENSG00000075223, ENSG00000116525, ENSG00000070193	694	178	16792	2.17492	1	0.114128	12.7469
GOTERM_BP_ALL	GO:0055123~digestive system development	14	1.63361	0.00705854	ENSG00000163513, ENSG00000166949, ENSG00000114315, ENSG00000164093, ENSG00000092969, ENSG00000113971, ENSG00000182580, ENSG00000145431, ENSG00000129757, ENSG00000078699, ENSG00000102678, ENSG00000070193, ENSG00000139687, ENSG00000165617	694	145	16792	2.33616	1	0.114556	12.8288
GOTERM_BP_ALL	GO:0030521~androgen receptor signaling pathway	8	0.933489	0.0071757	ENSG00000108510, ENSG00000114861, ENSG00000084676, ENSG00000164758, ENSG00000180530, ENSG00000115548, ENSG00000163909, ENSG00000139687	694	55	16792	3.51941	1	0.116034	13.028
[truncated: 451 more rows]

## Sheet: PAX7 Up Only Vs OCT4
Column ID	p-value(Attribute)	p-value(MYOG vs. OCT4)	Ratio(MYOG vs. OCT4)	Fold-Change(MYOG vs. OCT4)	Fold-Change(MYOG vs. OCT4) (Description)	Fold Change(MYOG vs. OCT4) 95% lower limit	Fold Change(MYOG vs. OCT4) 95% upper limit	T(MYOG vs. OCT4)	F(Attribute)	SS(Attribute)	SS(Error)	F(Error)	Column #	p-value(Attribute)	p-value(PAX7 vs. OCT4)	Ratio(PAX7 vs. OCT4)	Fold-Change(PAX7 vs. OCT4)	Fold-Change(PAX7 vs. OCT4) (Description)	Fold Change(PAX7 vs. OCT4) 95% lower limit	Fold Change(PAX7 vs. OCT4) 95% upper limit	T(PAX7 vs. OCT4)	F(Attribute)	SS(Attribute)	SS(Error)	F(Error)
[truncated: 1,129 more rows]

[truncated: 4 more sheets: GO Term MF PAX7 Up Only, MYOG Up Only Vs OCT4, GO Term BP MYOG Up Only, PAX7 Vs MYOG]
