# Supplementary material for: Transcriptional landscape of myogenesis from human pluripotent stem cells reveals a key role of TWIST1 in maintenance of skeletal muscle progenitors
Source: eLife. 2020 Feb 3;9:e46981. doi: 10.7554/eLife.46981 (PMC6996923; doi:10.7554/eLife.46981)
Supplement: Supplementary file 3. [file elife-46981-supp3.xlsx]

## Sheet: Clustering (median_log2)
Gene ID	Gene Name	OCT4	MSGN1	PAX7	MYOG	TUBE	Cluster #
ENSG00000000003	TSPAN6	0.699553845137983	1.3059128536671	-0.115399633725215	-0.891544254801299	-0.998522810278565	9
ENSG00000000005	TNMD	1.15301578212273	-0.189322631092449	0.898338192092823	-0.714082872320508	-1.1479484708026	8
ENSG00000000419	DPM1	1.4651120143813	0.41780535836984	-0.170897445007065	-1.15946788074575	-0.552552046998324	9
ENSG00000000457	SCYL3	-0.813448025859586	1.07840041694667	0.874546817058511	0.0472161535041506	-1.18671536164975	5
ENSG00000000460	C1orf112	0.865652217623642	0.679031561935372	0.585029634100845	-0.76530446507455	-1.36440894858531	8
ENSG00000000971	CFH	-1.02455781842791	-1.02475467874506	1.11156610119692	0.13354069421365	0.8042057017624	10
ENSG00000001036	FUCA2	1.14010516659219	0.446384293551399	-0.585721803455222	-1.4106209648094	0.409853308121036	9
ENSG00000001084	GCLC	1.24646248571253	0.644201449554044	-0.11989919040891	-0.411485728935934	-1.35927901592173	8
ENSG00000001167	NFYA	0.159975801931229	0.484469204750478	1.16250345595964	-0.288758169221343	-1.51819029342001	8
ENSG00000001460	STPG1	1.20338459173067	0.947095719455141	-0.533417921681934	-0.631196542710238	-0.985865846793636	9
ENSG00000001461	NIPAL3	0.583025788040127	-1.22762757097584	-0.381011719541907	-0.347977780104443	1.37359128258207	2
ENSG00000001497	LAS1L	1.13154716067478	0.789964158403934	-0.0324369095028396	-0.550707015460934	-1.33836739411494	8
ENSG00000001561	ENPP4	0.233065797281775	-1.37229266942352	-0.0580195169297982	1.41789953410829	-0.220653145036752	3
ENSG00000001617	SEMA3F	0.236514389422628	1.47645432461725	0.144033844364226	-1.02640064496358	-0.830601913440522	1
ENSG00000001626	CFTR	1.76284411502339	-0.582366462246848	-0.443068728236406	-0.162507868165385	-0.574901056374751	6
ENSG00000001629	ANKIB1	1.05092111884467	0.0623699391032752	0.905298350588852	-1.14112430821823	-0.877465100318571	8
ENSG00000001630	CYP51A1	-0.182763135694466	1.36690283747369	0.636874253186935	-0.779130528538929	-1.04188342642723	1
ENSG00000001631	KRIT1	0.378688992503383	0.420383880505813	0.899395197803989	-0.00408214836236293	-1.69438592245082	8
ENSG00000002016	RAD52	-0.216195239139294	0.714539451118489	0.207109981462681	0.902455287919828	-1.6079094813617	5
ENSG00000002330	BAD	-1.20295768277661	-0.245419852999072	0.780137955959848	-0.577136104684051	1.24537568449988	2
ENSG00000002549	LAP3	0.880442534972298	0.48306437353759	-0.0890526548106011	-1.67920182805773	0.404747574358444	9
ENSG00000002586	CD99	-0.908102501507475	-0.336606078172027	-0.555043148669396	0.146742358027875	1.65300937032102	2
ENSG00000002587	HS3ST1	-0.348890084180579	-0.222936852001928	-0.365739119518944	-0.807009806278636	1.74457586198009	2
ENSG00000002726	AOC1	-0.345650440956568	-0.645411225921709	-0.105990989662263	-0.645411225921709	1.74246388246225	2
ENSG00000002745	WNT16	-0.371941461406266	-0.649649540429167	-0.175239692806839	-0.561908792338372	1.75873948698064	2
ENSG00000002746	HECW1	1.7861248075831	-0.484730310100849	-0.478856590276177	-0.471297112659249	-0.351240794546827	6
ENSG00000002822	MAD1L1	0.31692391379833	0.925789243091201	0.856365887498944	-0.819273849902308	-1.27980519448616	8
ENSG00000002834	LASP1	1.01362635639722	-0.513930107046779	0.395980451733443	-1.48478544661303	0.589108745529147	6
ENSG00000002919	SNX11	1.58804363765383	-0.399676637820022	-1.0083229693022	-0.467813527346622	0.287769496815017	6
ENSG00000002933	TMEM176A	-0.620856289274183	-0.779461608459721	1.68124422545613	-0.40592043214806	0.12499410442583	4
ENSG00000003056	M6PR	0.940961474475233	1.13137656724615	-0.825735914941487	-1.05673521880999	-0.189866907969909	9
ENSG00000003096	KLHL13	-0.53987496710427	-0.358409566112873	0.536257739077894	1.45124438792417	-1.08921759378492	3
ENSG00000003137	CYP26B1	-1.23826400568903	-0.263694800383798	0.917196708907179	1.12453011770883	-0.539768020543189	3
ENSG00000003147	ICA1	1.78472912306901	-0.335517095009596	-0.453815438226737	-0.477516635823612	-0.517879954009063	6
ENSG00000003249	DBNDD1	1.22964087598257	-1.40459418341207	-0.498896011275388	0.476861812767463	0.196987505937429	6
ENSG00000003393	ALS2	0.355984065290787	-1.29437820310149	-0.813886847858023	0.886247052843776	0.86603393282495	10
ENSG00000003400	CASP10	1.76916404133564	-0.225463168674856	-0.626300727968942	-0.403198541640471	-0.514201603051373	6
ENSG00000003402	CFLAR	-0.626568080596224	-1.10767010952067	-0.167789096846119	1.47229681396375	0.429730472999266	10
ENSG00000003436	TFPI	0.123504130951355	-0.365611536845617	-0.67777573363602	-0.758377455256927	1.67826059478721	2
ENSG00000003509	NDUFAF7	1.69773225205474	0.00954008271779259	-0.344430759662268	-0.493920041518194	-0.868921533592075	6
ENSG00000003756	RBM5	-0.661355658464863	0.361850853314676	0.828200111186106	0.877142133509073	-1.40583743954499	5
ENSG00000003987	MTMR7	1.77525834902638	-0.541978037747983	-0.37919812080243	-0.27505722776057	-0.579024962715395	6
ENSG00000003989	SLC7A2	0.678734367060976	0.143134694783911	0.818707120766696	0.046546859261259	-1.68712304187284	7
ENSG00000004059	ARF5	1.08279310112388	0.895967010823527	0.0246645953389897	-1.09482141477169	-0.908603292514713	9
ENSG00000004139	SARM1	-0.657095147337201	-0.130363470443707	1.75492183954146	-0.441969622837645	-0.525493598922905	4
ENSG00000004142	POLDIP2	0.491214986273442	0.495560575469371	0.0453413773417355	-1.73639428906675	0.704277349982211	9
ENSG00000004399	PLXND1	0.418082523465185	-0.0848097017215922	0.958245786159694	-1.66206860089176	0.370549992988479	2
ENSG00000004455	AK2	0.2276688203113	-0.562608305611533	0.854959649169504	-1.43590810378679	0.915887939917521	2
ENSG00000004478	FKBP4	1.19402558521617	0.763767971984761	0.0305033509651397	-0.91239077894492	-1.07590612922115	9
ENSG00000004487	KDM1A	0.567438224273915	0.895029690514396	0.620853154166158	-0.640809104694512	-1.44251196425996	8
ENSG00000004534	RBM6	0.813015048396193	0.298037300682708	0.678982554925326	-0.124611549307482	-1.66542335469675	8
ENSG00000004660	CAMKK1	-0.685637378792699	-1.2945934425282	0.217794891267376	0.525265450685812	1.23717047936771	10
ENSG00000004700	RECQL	1.63973705987704	-0.256319438238812	-0.416261898538803	-1.03339312848472	0.0662374053852952	6
ENSG00000004766	CCDC132	-1.16006600646844	-0.885405681836843	0.911288422979874	0.121742775204795	1.01244049012062	10
ENSG00000004777	ARHGAP33	0.481680632753313	0.759946994775322	0.865466451005713	-0.720748731392383	-1.38634534714196	8
ENSG00000004779	NDUFAB1	1.43826090385136	0.337378228531644	-0.75713594164738	-1.11160211394562	0.0930989232099923	9
ENSG00000004799	PDK4	-0.420837475383556	-1.36920688315476	0.842411131969633	1.10211091101415	-0.154477684445471	3
ENSG00000004838	ZMYND10	-0.827884015569752	-0.82797853155392	0.879913625214147	1.26938334890239	-0.493434426992863	3
ENSG00000004848	ARX	-0.729166121508579	-0.742832741472265	-0.501120570011829	1.58605713572568	0.38706229726699	10
ENSG00000004864	SLC25A13	1.04693231537882	1.03915153180032	-0.220183950304615	-0.800994205055848	-1.06490569181867	9
ENSG00000004866	ST7	-0.745458875285623	-0.614261857768248	1.38615622661653	0.743483955708259	-0.769919449270914	4
ENSG00000004897	CDC27	-1.13445403105722	0.0209917435838746	1.55167875680507	0.104040026046149	-0.542256495377879	4
ENSG00000004948	CALCR	1.78169630000632	-0.497021772123759	-0.29063098363504	-0.497021772123759	-0.497021772123759	6
ENSG00000004961	HCCS	-0.143392381937888	-1.32777286399945	-0.396285826307095	0.536404106619901	1.33104696562453	10
ENSG00000004975	DVL2	-0.00423760032201675	1.20207712627385	0.479989880880328	-0.161771225167251	-1.51605818166491	5
ENSG00000005001	PRSS22	1.78885438199983	-0.447213595499958	-0.447213595499958	-0.447213595499958	-0.447213595499958	6
ENSG00000005007	UPF1	1.22315130300376	0.143461389036834	0.180955386422851	0.0177623552395326	-1.56533043370297	8
ENSG00000005020	SKAP2	-0.775729346874844	1.55347143978213	-0.827866951137164	-0.36116970748619	0.411294565716072	1
ENSG00000005022	SLC25A5	1.13870155012626	0.766474967589261	0.137685170306404	-0.949751839124894	-1.09310984889703	8
ENSG00000005059	CCDC109B	0.402584395600926	-0.0702247363158426	-0.642100839614416	-1.1437307734567	1.45347195378604	2
ENSG00000005073	HOXA11	-1.02773493014404	-1.02773493014404	0.720420827149719	0.17898705736533	1.15606197577304	10
ENSG00000005075	POLR2J	0.781872955098205	0.640962541984633	-0.0289049681673596	-1.69833558680421	0.304405057888733	9
ENSG00000005100	DHX33	1.16141047401222	0.708304090869028	0.119968332807346	-0.715897361114239	-1.27378553657435	8
ENSG00000005102	MEOX1	-0.823890553170954	-0.444147333131521	0.68213839631249	1.40806982932645	-0.822170339336462	3
ENSG00000005108	THSD7A	0.451397630694438	-1.02939168752032	1.1879150066192	0.449840521134093	-1.05976147092741	7
ENSG00000005156	LIG3	1.07906744406665	0.567981303424558	0.0321623451475628	-0.09727767844372	-1.58193341419505	8
ENSG00000005175	RPAP3	1.10852397809335	0.906146033982728	-0.116457651296649	-0.689388557541341	-1.20882380323809	9
ENSG00000005187	ACSM3	0.251528204023322	1.40339127929339	-0.795746913182319	0.265008768654475	-1.12418133878886	1
ENSG00000005189	AC004381.6	0.671513278592351	1.23006741701557	-0.0883888154102571	-0.468213067273134	-1.34497881292452	8
ENSG00000005194	CIAPIN1	1.37427557242431	-0.104957114339623	0.223608387671639	-0.062382045862149	-1.43054479989418	7
ENSG00000005206	SPPL2B	-0.0762284328025754	-0.0290932033117001	1.14918996704297	0.509539218836809	-1.55340754976551	5
ENSG00000005238	FAM214B	-0.823241247115686	-0.415590823939549	-0.175303314116651	-0.322237272030171	1.73637265720206	2
ENSG00000005243	COPZ2	-0.786971258572385	-0.605078446594834	-0.192010161816144	-0.136157972676311	1.72021783965967	2
ENSG00000005249	PRKAR2B	1.43250436421569	0.560357095935463	-0.225594829964303	-0.987128419193021	-0.780138210993827	9
ENSG00000005302	MSL3	-1.1417305029356	-0.180427060928883	1.51650665966982	-0.512637723170881	0.318288627365552	4
ENSG00000005339	CREBBP	0.403042549013579	-0.182850321450619	1.14391224731672	0.202593659197751	-1.56669813407743	7
ENSG00000005379	BZRAP1	0.0930780021427706	0.934073607129169	0.918047597888121	-0.534346473399765	-1.4108527337603	8
ENSG00000005436	GCFC2	0.12233477516098	0.868081803501918	0.806540724880496	-0.203341086628853	-1.59361621691454	8
ENSG00000005448	WDR54	0.738609972276064	1.13692113250091	0.176269895776234	-1.13959064548422	-0.912210355068992	9
ENSG00000005469	CROT	-0.352902241135761	-1.41110151646337	1.17500079349506	-0.111800996318714	0.700803960422792	4
ENSG00000005471	ABCB4	-0.11294533770896	1.75483976500691	-0.594869285768714	-0.577273426376099	-0.469751715153138	1
ENSG00000005483	KMT2E	0.265594191691909	0.628076990566032	0.724505051148727	0.113089818659448	-1.73126605206611	5
ENSG00000005486	RHBDD2	-1.40257346892455	1.22463592972103	0.0500667968222959	-0.447128399968462	0.574999142349683	1
ENSG00000005513	SOX8	-0.978298263248705	-0.727297465516715	0.978657957132788	1.16720399323825	-0.44026622160562	3
ENSG00000005700	IBTK	-0.32723885868013	-1.55488158287097	0.22778299125054	0.661402773004089	0.992934677296474	10
ENSG00000005801	ZNF195	1.04581122817754	0.53992781264466	0.382119794542872	-0.467931793266072	-1.499927042099	8
ENSG00000005810	MYCBP2	-0.569056035531079	1.04957805853241	1.11776903017776	-0.953881393976988	-0.644409659202108	1
ENSG00000005812	FBXL3	-1.06650519916566	-0.824097073622217	1.37455299014864	-0.0255959852373429	0.541645267876574	4
ENSG00000005882	PDK2	-0.918306403242576	-1.21794440396569	0.854982051625228	0.887115267511591	0.39415348807145	10
ENSG00000005884	ITGA3	0.201860206390785	-1.33916682516091	-0.207954533913507	-0.107682117015564	1.45294326969919	2
ENSG00000005889	ZFX	-0.849680475999446	-0.969932965332624	1.18864717715358	0.91770062039623	-0.286734356217748	4
ENSG00000005893	LAMP2	-0.870638955220233	-0.968183345277163	0.0544937424658456	0.29646089220757	1.48786766582398	10
ENSG00000005955	GGNBP2	-1.42277170616675	0.767990086647511	0.660827097512958	0.68588987238176	-0.691935350375483	5
ENSG00000005961	ITGA2B	0.899524907556364	1.10322835984201	-0.585042481182296	-0.149161063468476	-1.26854972274761	9
ENSG00000005981	ASB4	-0.761803003685584	-0.761803003685584	-0.483023314085729	1.54770433198223	0.458924989474668	10
ENSG00000006007	GDE1	-0.140788953743236	-1.02776129052965	0.405098939172107	-0.729208886935241	1.49266019203602	2
ENSG00000006015	C19orf60	0.874955678311632	0.646921855536423	0.651515984930296	-1.20845862013789	-0.964934898640456	8
ENSG00000006016	CRLF1	1.72875877455845	-0.283044708500035	-0.730823547419679	-0.623566949617636	-0.0913235690211053	6
ENSG00000006025	OSBPL7	-0.994997348921304	-0.580919152373399	-0.00424260324708669	1.63389345845219	-0.053734353910403	3
ENSG00000006042	TMEM98	0.140877801015133	1.21611996954092	0.614615800828052	-0.685954284614906	-1.2856592867692	8
ENSG00000006047	YBX2	1.71814690966212	-0.0941976158565134	-0.506577177480407	-0.277423417494746	-0.839948698830454	6
ENSG00000006062	MAP3K14	-0.678631229399527	-1.37751621396038	0.330575033022693	0.714751056228414	1.0108213541088	10
ENSG00000006071	ABCC8	1.42678927234008	-0.0327875675243363	0.223393826946985	-0.258557605217716	-1.35883792654502	8
ENSG00000006114	SYNRG	0.736630219930643	-0.335273296813616	0.924349432009631	0.234865373281125	-1.56057172840778	7
ENSG00000006118	TMEM132A	-1.26313966351153	0.872355133822855	1.15952808866035	-0.342622570904397	-0.426120988067276	4
ENSG00000006125	AP2B1	0.938914138027729	1.03923653612263	-0.0808461148211193	-1.28924681403948	-0.608057745289758	9
ENSG00000006128	TAC1	0.113299531118582	1.42717780296489	-0.145853561148456	-0.00573190567888503	-1.38889186725613	1
ENSG00000006194	ZNF263	-0.142015888232434	0.226933640319513	0.870033451827875	0.687730067045221	-1.64268127096017	5
ENSG00000006210	CX3CL1	1.27800510149277	-0.290619603781779	0.8121983114391	-0.940572820908916	-0.859010988241178	8
ENSG00000006282	SPATA20	-0.994248638604708	-1.11629514214737	0.530852752700503	1.13323908061364	0.446451947437938	10
ENSG00000006283	CACNA1G	-0.0110214021968527	0.80423833285263	1.16281882189097	-0.768382851170739	-1.18765290137601	8
ENSG00000006327	TNFRSF12A	0.467322275023225	-1.43277000534866	-0.505056794692478	0.292247827922698	1.17825669709522	2
ENSG00000006377	DLX6	1.77654597650745	-0.511747816954482	-0.511747816954482	-0.241302525644001	-0.511747816954482	6
ENSG00000006432	MAP3K9	1.34605169871918	0.802589626663062	-0.676530579487968	-0.699000909808078	-0.773109836086192	9
ENSG00000006451	RALA	1.17249200186755	0.565918777715338	-0.225376796346507	-1.50135517036587	-0.0116788128705076	9
ENSG00000006453	BAIAP2L1	0.984188133016704	1.06353761102217	-1.17606916923768	-0.173883459486511	-0.697773115314679	9
ENSG00000006459	KDM7A	0.0262050433217643	1.1960421829605	-0.542803812828966	0.671054909796352	-1.35049832324965	1
ENSG00000006468	ETV1	1.5536457656059	-0.56660463056809	-0.969386966950927	-0.412111785658763	0.394457617571879	6
ENSG00000006530	AGK	0.806377785487437	0.745589716452802	0.633094707564917	-1.03870962511053	-1.14635258439463	8
ENSG00000006534	ALDH3B1	-0.620958351226998	0.512150289585661	-0.717664188539123	-0.70380074297816	1.53027299315862	2
ENSG00000006576	PHTF2	0.0975570912318485	0.362807461333888	0.487636973606912	-1.73330813126724	0.785306605094594	2
ENSG00000006606	CCL26	1.71061315575087	-0.347066637586561	-0.512490593555617	-0.83083813893308	-0.0202177856756144	6
ENSG00000006607	FARP2	-0.705357838003187	-0.713725323549	1.38768031021474	0.746083781013715	-0.714680929676272	4
ENSG00000006611	USH1C	0.237609180731995	-0.40257078027803	1.5388387563383	-0.20233322085683	-1.17154393593544	7
ENSG00000006625	GGCT	0.856405774866491	1.1997478556007	-0.184494497927069	-1.08002051220822	-0.791638620331897	9
ENSG00000006634	DBF4	0.882353804252913	0.66012784684945	0.566968676284936	-0.708792245204503	-1.4006580821828	8
ENSG00000006638	TBXA2R	-0.0173204166484205	1.6075556728902	-0.719826664298532	-0.944374589992304	0.0739659980490613	1
ENSG00000006652	IFRD1	-0.495959772896048	1.01559211296203	-0.0524995233677711	0.908960140486012	-1.37609295718423	5
ENSG00000006695	COX10	0.491089811070598	1.10415338104834	0.350740118210215	-0.461507561560375	-1.48447574876878	8
ENSG00000006704	GTF2IRD1	-0.0657220688956062	-0.802923091767919	0.798944315022572	1.19894964451885	-1.1292487988779	3
ENSG00000006712	PAF1	-0.802927044404429	0.503656166717875	1.00445325171718	-1.3128180357037	0.607635661673076	4
ENSG00000006715	VPS41	0.505679994278035	0.0832910618270628	1.01069080941767	-1.6472963857922	0.0476345202694294	8
ENSG00000006740	ARHGAP44	1.42315762435418	0.642995522973022	-0.386092303855993	-0.86015065657235	-0.819910186898863	9
ENSG00000006744	ELAC2	1.1503783320504	0.646395695941245	0.287994702361798	-1.00543156217514	-1.07933716817831	8
ENSG00000006747	SCIN	-0.23974184139332	-1.0024804587571	0.308869572028025	-0.630270013211631	1.56362274133403	2
ENSG00000006756	ARSD	-1.09192755026089	0.377287118168533	-0.048167513101643	-0.707653088695328	1.47046103388933	2
ENSG00000006788	MYH13	-0.531741892686327	-0.531741892686327	1.77423961365451	-0.225016898600433	-0.485738929681426	4
ENSG00000006831	ADIPOR2	0.269121290853852	1.40032016680123	0.169782622782733	-1.27066646137665	-0.568557619061157	9
ENSG00000006837	CDKL3	-0.80512290449793	-0.0898321154041359	1.17989205168543	0.835019972537626	-1.11995700432099	5
ENSG00000007047	MARK4	-0.623301256789988	0.397400698680687	-0.115220257839482	1.47096627050707	-1.12984545455829	3
ENSG00000007062	PROM1	1.58242760260224	-0.311058088154945	0.325385779119484	-0.702262847465236	-0.894492446101548	6
ENSG00000007080	CCDC124	1.24595921793204	0.103023141167985	0.650026062876095	-0.908893390303787	-1.09011503167233	8
ENSG00000007168	PAFAH1B1	0.255988302604252	-1.41503575709061	1.37946365473633	-0.159867790417942	-0.0605484098320239	4
ENSG00000007171	NOS2	1.39258010798336	0.716438266955663	-0.554279662924249	-0.651662004510934	-0.903076707503843	9
ENSG00000007174	DNAH9	-0.510082216849043	0.912970109567339	1.06927956252824	-0.153286841861666	-1.31888061338487	5
ENSG00000007202	KIAA0100	0.389475935096658	0.327991035222137	0.925696627655297	-1.69731658346478	0.0541529854906951	9
ENSG00000007237	GAS7	1.50545933356819	-0.419639594478549	0.464576384264281	-1.0395836884107	-0.510812434943225	6
ENSG00000007255	TRAPPC6A	0.806092462224004	0.878278502357256	0.197241636270794	-0.320441665021438	-1.56117093583062	8
ENSG00000007264	MATK	1.6877931936155	-0.548477637482138	0.138575280245397	-0.552861698411093	-0.725029137967662	6
ENSG00000007312	CD79B	0.564121558575629	1.50223765013137	-0.722545450989244	-0.677350830410261	-0.666462927307492	9
ENSG00000007314	SCN4A	1.01278808831738	0.966354612051351	-1.05807427227679	-0.958888687117883	0.0378202590259434	9
ENSG00000007341	ST7L	-0.433287849709033	0.449145818022393	0.762036492985897	0.778800636046184	-1.55669509734544	5
ENSG00000007350	TKTL1	-0.7707579536621	1.52197101099543	0.444450636141312	-0.300179182846139	-0.895484510628502	1
ENSG00000007372	PAX6	1.26149603856541	-0.986229525866983	0.855413716184389	-0.385024348128067	-0.745655880754748	7
ENSG00000007376	RPUSD1	0.638547519387258	0.945255415657366	0.41552082263876	-1.51320056608434	-0.48612319159904	9
ENSG00000007384	RHBDF1	-0.418080558660563	-0.45398956703595	-1.20696558806621	1.01562811885313	1.0634075949096	10
ENSG00000007392	LUC7L	0.0705230504136246	0.514478575991058	0.757274249221662	0.390940623906277	-1.73321649953262	5
ENSG00000007402	CACNA2D2	1.65899269866386	-0.198404718135463	0.0818747861711062	-0.693515169906595	-0.848947596792908	6
ENSG00000007516	BAIAP3	1.42480469544069	-0.27028373207499	0.0567665989090205	0.155948976842049	-1.36723653911677	7
ENSG00000007520	TSR3	-0.660630268671113	0.275471611176538	0.092358179299014	-1.16437948043028	1.45717995862585	2
ENSG00000007541	PIGQ	-0.206623990476049	0.677979691151961	1.20709063597841	-0.277088305076219	-1.40135803157811	5
ENSG00000007545	CRAMP1L	0.339150312414432	-0.153583585961164	1.20633932043942	0.151818576097441	-1.54372462299013	7
ENSG00000007866	TEAD3	-0.250469341517684	-0.826561722982376	1.19124338478144	0.899052246772764	-1.01326456705414	7
ENSG00000007923	DNAJC11	1.44058565537227	0.369328980201511	0.0158794495738284	-1.1591640687062	-0.66663001644141	9
ENSG00000007933	FMO3	-0.667725496844259	-0.667725496844259	-0.280712714708797	1.73638491014502	-0.120221201747706	3
ENSG00000007944	MYLIP	-0.0792974021039817	-1.39911867813808	0.318167600870051	1.37443524845989	-0.214186769087874	3
ENSG00000007968	E2F2	0.400438880815338	-0.335788928525803	1.48241032321573	-0.365696603200176	-1.18136367230508	7
ENSG00000008018	PSMB1	1.55555272952853	0.129373094055003	-0.25866830267355	-1.20277340680927	-0.223484114100712	6
ENSG00000008056	SYN1	1.67376707099107	-0.548408249946051	-0.158749251330816	-0.0330915972851069	-0.933517972429093	6
ENSG00000008083	JARID2	1.57751068180243	0.157380748081096	-0.0747874110462841	-0.602977665423251	-1.057126353414	6
ENSG00000008086	CDKL5	1.45091896889426	-0.825375784005551	0.337265394232235	0.082661679417876	-1.04547025853882	7
ENSG00000008118	CAMK1G	-0.0017616128647747	0.799048683570721	-0.895872088700274	-1.08076762121834	1.17935263921266	2
ENSG00000008128	CDK11A	-0.0960942230488177	0.157492534769912	0.724883402432629	0.8581358085051	-1.64441752265882	5
ENSG00000008130	NADK	0.571760650933516	0.90786703915823	0.611547189079858	-0.665869751596755	-1.42530512757485	8
ENSG00000008196	TFAP2B	-0.541988453757918	-0.683243856860215	1.6439711985025	0.264504968975851	-0.683243856860215	4
ENSG00000008226	DLEC1	-0.0107403735239784	-0.554452534949838	-0.236435118608381	1.68830415304723	-0.886676125965037	3
ENSG00000008256	CYTH3	-0.72160808454303	-0.788411657847062	0.634481404528935	-0.580032011769177	1.45557034963034	2
ENSG00000008277	ADAM22	1.29494494173634	0.734944186588102	-0.155151265315377	-0.965490967730195	-0.909246895278871	9
ENSG00000008282	SYPL1	0.758423840319305	0.467594815714724	0.932572948179852	-1.02142868629904	-1.13716291791484	8
ENSG00000008283	CYB561	1.68878534850744	-0.106522443658457	-0.442439994956114	-0.951556403536436	-0.188266506356437	6
ENSG00000008294	SPAG9	-0.45611521274408	-1.15568067043485	1.47340666000687	0.440582634002611	-0.30219341083055	4
ENSG00000008300	CELSR3	1.41766890087858	0.392674162765397	0.0641148775069239	-0.743431543749565	-1.13102639740133	8
ENSG00000008311	AASS	1.6931520976218	-0.134156872296988	-0.114525569493502	-0.550660487529567	-0.893809168301747	6
ENSG00000008323	PLEKHG6	1.77123484984806	-0.278422713399401	-0.47946049681649	-0.361960999277705	-0.651390640354465	6
ENSG00000008324	SS18L2	1.08758327972506	0.885881886386804	0.0111484091727896	-0.814956732095292	-1.16965684318936	8
ENSG00000008382	MPND	0.506643979181632	0.813876619550105	0.766135166307631	-0.645277953133018	-1.44137781190635	8
ENSG00000008394	MGST1	1.34783509961571	0.74468904839103	-0.736678238198366	-0.966821616413088	-0.389024293395287	9
ENSG00000008405	CRY1	0.500469199097236	-0.12115784427479	1.20993596563359	-0.0846754952879143	-1.50457182516812	7
ENSG00000008441	NFIX	-0.881099807603549	-0.9134581097484	0.642797750483467	-0.234302834725852	1.38606300159433	10
ENSG00000008513	ST3GAL1	-1.00928373038685	-0.399423604813358	1.19909201699047	-0.720424483831276	0.930039802041015	4
ENSG00000008516	MMP25	1.78353662515424	-0.500302960789669	-0.535126450520014	-0.338687419615547	-0.409419794229011	6
ENSG00000008517	IL32	-0.654696010638193	-0.823598261662119	-0.662446079298852	0.785028623812587	1.35571172778658	10
ENSG00000008710	PKD1	0.0489401995350481	0.866660803787414	1.04263414440743	-0.631212772186792	-1.32702237554311	8
ENSG00000008735	MAPK8IP2	1.43859107373323	0.483677788766873	-0.200034899355936	-0.566623648570556	-1.15561031457361	9
ENSG00000008838	MED24	0.651703496284627	0.967554837575341	0.470425223752809	-0.702473838869339	-1.38720971874344	8
ENSG00000008853	RHOBTB2	-1.16391221306772	-0.902689303732884	0.575625583316503	1.18572140022659	0.305254533257511	10
ENSG00000008869	HEATR5B	-0.386376762289343	1.09004124000642	0.343551012180892	0.475433208550026	-1.522648698448	5
ENSG00000008952	SEC62	0.0593120498542934	-1.09933094212438	1.49973616718275	0.235477264257378	-0.695194539170045	4
ENSG00000008988	RPS20	-0.216042358155324	0.86606027378934	0.512568890692128	0.48283403112745	-1.64542083745359	5
ENSG00000009307	CSDE1	0.0981682114829616	-0.0378470122653901	-1.02798688552562	-0.626118761393468	1.59378444770153	2
ENSG00000009335	UBE3C	0.47490684846488	-0.0802811260147635	0.0337700854985302	-1.56976356510594	1.14136775715729	2
ENSG00000009413	REV3L	-1.64889174609579	-0.249490786390928	0.650908669361926	0.531182240371267	0.716291622753522	10
ENSG00000009694	TENM1	-0.250251376657826	1.77228041377209	-0.52175207259538	-0.390835794027222	-0.609441170491658	1
ENSG00000009709	PAX7	-0.796886572391139	-0.829880816463234	1.57542527405637	0.3363049421391	-0.2849628273411	4
ENSG00000009780	FAM76A	0.17964833668934	0.795098657513959	-0.173354026490495	0.820855323701102	-1.62224829141391	5
ENSG00000009830	POMT2	-0.26642075948509	0.51354769487659	1.47623092669139	-0.83876785641861	-0.884590005664282	4
ENSG00000009844	VTA1	0.432471327624138	-1.40555605819799	-0.201410625397402	-0.15675998575984	1.33125534173109	2
ENSG00000009950	MLXIPL	1.66784202600062	0.194188958490416	-0.649147836949326	-0.715202655264233	-0.497680492277478	6
ENSG00000009954	BAZ1B	0.706116736995657	0.736231917359515	0.711202294922586	-0.81729313639114	-1.33625781288661	8
ENSG00000010017	RANBP9	-0.948642331970843	-0.281714879424548	1.28573372449753	0.798771047737947	-0.854147560840085	4
ENSG00000010030	ETV7	1.12412995004592	-0.828732175938891	-0.834012999172734	-0.50815749049363	1.04677271555934	2
ENSG00000010072	SPRTN	-0.930391985978401	0.721651839840713	0.972071838993754	0.448191996114208	-1.21152368897028	5
ENSG00000010165	METTL13	1.16325451182003	0.821588866779011	0.000910302022108787	-1.00338888138538	-0.982364799235774	9
ENSG00000010219	DYRK4	-1.55621371189751	0.207404442643176	-0.0978118886350528	1.21283010219637	0.233791055693016	3
ENSG00000010244	ZNF207	0.85286599367812	0.359410914154825	0.55843300655334	-0.0904055347917273	-1.68030437959456	8
ENSG00000010256	UQCRC1	0.843253638053772	1.09741893813424	-0.121499703300262	-1.36518375179264	-0.453989121095115	9
ENSG00000010270	STARD3NL	-0.616188477470447	-0.343233545608103	-0.369074542015638	-0.450165221073608	1.7786617861678	2
ENSG00000010278	CD9	1.51049150816567	-1.20306735789766	0.296951368267866	-0.312896104183305	-0.291479414352571	6
ENSG00000010282	HHATL	-0.730920163553002	-0.787736683070633	-0.668159167988901	1.15548786718845	1.03132814742409	10
ENSG00000010292	NCAPD2	0.727065366757951	0.839839302389439	0.552678737928585	-0.732472897563666	-1.38711050951231	8
ENSG00000010295	IFFO1	-0.886725139779796	-0.213677390877411	-0.352200856380056	-0.270941194613295	1.72354458165056	2
ENSG00000010310	GIPR	-0.347308086849196	1.13218280735204	-0.335498552926084	0.867101830649628	-1.31647799822639	5
ENSG00000010318	PHF7	0.694566328241614	1.05781873359066	-0.16141078507876	-0.0515301079132473	-1.53944416884027	8
ENSG00000010319	SEMA3G	-0.188634106326698	0.429057238901581	1.40869320706602	-0.357590206675648	-1.29152613296526	5
ENSG00000010322	NISCH	-0.204824687976466	0.673125440236665	1.10717938946152	-0.0673117434148139	-1.50816839830691	5
ENSG00000010361	FUZ	0.465722871033513	1.02945440284428	0.620777619784551	-0.835122751313382	-1.28083214234896	8
ENSG00000010379	SLC6A13	-0.768513763506347	-0.823893185435046	-0.408978384643366	1.53010350368818	0.471281829896582	10
ENSG00000010404	IDS	0.526861242230331	-0.792986375931764	-0.402052847724746	-0.82967912176189	1.49785710318807	2
ENSG00000010539	ZNF200	0.619731011421123	-0.539297062377292	0.98798683719682	0.408713960495714	-1.47713474673637	7
ENSG00000010610	CD4	0.627958233538782	1.44049089930786	-0.45806130147313	-0.915102482952659	-0.695285348420853	9
ENSG00000010626	LRRC23	-1.27752911976698	-0.600878197056596	0.524020182797579	1.31558425227659	0.038802881749398	3
ENSG00000010704	HFE	0.147770033908016	-0.575678003949881	0.54334201103796	-1.35094472724152	1.23551068624543	2
ENSG00000010803	SCMH1	-1.19248909714657	1.15544391683273	0.698193924847837	0.187540248423704	-0.848688992957695	5
ENSG00000010810	FYN	-1.40012812330921	-0.53476299689261	1.1897974743688	0.546428211984358	0.198665433848656	4
ENSG00000010818	HIVEP2	-0.505818749689476	-0.506527157976622	-1.10037199853224	1.20630997836298	0.906407927835356	10
ENSG00000010932	FMO1	-0.94075505159777	-0.998872049235884	0.190015868138742	0.350134862818181	1.39947636987673	10
ENSG00000011007	TCEB3	0.439828119510653	-1.76970392571216	0.258280999926008	0.665859794445953	0.405735011829542	10
ENSG00000011009	LYPLA2	1.63558978256136	0.010772576204184	-0.049434022469939	-0.952080958527816	-0.644847377767792	6
ENSG00000011021	CLCN6	-0.0928915437380378	1.10516875215544	0.401916889010144	0.189692651296802	-1.60388674872435	5
ENSG00000011028	MRC2	-0.387453716956576	0.903895301766591	-0.148382066055971	-1.39710472788908	1.02904520913503	2
ENSG00000011083	SLC6A7	-0.476954986777545	1.78805670407315	-0.476634078442029	-0.420315923242439	-0.414151715611141	1
ENSG00000011105	TSPAN9	-0.958312129813027	-1.1296337037767	1.09246278215355	0.256290315423005	0.739192736013172	10
ENSG00000011114	BTBD7	0.0708334617551703	-0.111003609409475	1.33255222372811	0.182011737602222	-1.47439381367603	7
ENSG00000011132	APBA3	0.967074464819688	0.411408669948695	0.0976808381644457	0.20966225702648	-1.68582622995931	8
ENSG00000011143	MKS1	0.317804696480063	0.766895072236461	0.408018384545177	0.261184812837316	-1.75390296609902	5
ENSG00000011198	ABHD5	1.56292152008277	-0.606671162259951	-0.408621882122186	-0.934233084755881	0.386604609055249	6
ENSG00000011201	KAL1	1.33414111724417	0.818834882295248	-0.770094011119259	-0.704685462957274	-0.67819652546289	9
ENSG00000011243	AKAP8L	0.0279373173638913	0.0863891647637592	0.443263247243589	1.07024571272539	-1.62783544209663	5
ENSG00000011258	MBTD1	1.10367547852182	-0.150832283816696	0.178138140070515	0.456237641291907	-1.58721897606754	7
ENSG00000011260	UTP18	1.00133180827774	0.902723870192131	0.0423137918018113	-0.594729513519664	-1.35163995675202	8
ENSG00000011275	RNF216	-0.43336968870844	0.251200847738857	1.38348331176933	0.145494406085741	-1.34680887688549	5
ENSG00000011295	TTC19	1.00366186828524	0.626346267031284	0.52536713020601	-1.1052676872579	-1.05010757826464	8
ENSG00000011304	PTBP1	0.880191322327667	0.814930297927399	0.466251619714294	-1.0174642683003	-1.14390897166906	8
ENSG00000011332	DPF1	0.934537089554098	0.357890194293983	0.831607389613214	-0.901982122506164	-1.22205255095513	8
ENSG00000011347	SYT7	1.70594818197206	-0.0246982544768813	-0.27853834247032	-0.819142237072935	-0.583569347951927	6
ENSG00000011376	LARS2	1.41402686730105	0.505797157842573	-0.0680120712231586	-0.813061270625085	-1.03875068329538	9
ENSG00000011405	PIK3C2A	1.08018752963966	0.53659778307675	0.37260210458292	-0.532311700125314	-1.45707571717401	8
ENSG00000011422	PLAUR	0.129766395395218	-0.154420843193613	-0.117478106363163	-1.33168333508502	1.47381588924658	2
ENSG00000011426	ANLN	0.949557077545891	0.59398917641426	0.600522742752502	-1.27985018459058	-0.864218812122068	8
ENSG00000011451	WIZ	-0.550254079566185	0.839125754052276	1.00389163245473	0.111797587609187	-1.40456089455001	5
ENSG00000011454	RABGAP1	-0.856800689114657	-0.0482731951560102	1.35590252608456	0.588055833855885	-1.03888447566977	4
ENSG00000011465	DCN	-1.03364945109937	-1.02983670200715	1.1606627556453	0.210245673348558	0.692577724112665	10
ENSG00000011478	QPCTL	0.325415634837423	1.22166383296768	0.343246028751438	-1.44374025785054	-0.446585238705999	9
ENSG00000011485	PPP5C	0.9025348068074	0.955194667199354	0.245069103943	-1.08375879170485	-1.01903978624491	8
ENSG00000011523	CEP68	0.00549454409005274	-0.577476988015572	0.995114534905123	0.925693119676581	-1.34882521065619	7
ENSG00000011566	MAP4K3	1.43078645542872	-0.303156371974172	0.588428256329335	-1.00340868611667	-0.712649653667209	6
ENSG00000011638	TMEM159	0.74078297116675	1.10314731637336	-1.38096439505776	0.10023622624466	-0.563202118727017	9
ENSG00000011677	GABRA3	0.84809070987923	1.31023812319156	-0.668564016105899	-0.68429874819704	-0.805466068767846	9
ENSG00000012048	BRCA1	0.943469707107648	0.763288278292889	0.400260804560514	-0.782139616174014	-1.32487917378704	8
ENSG00000012061	ERCC1	-0.85778202440211	1.32024260255415	0.827343223291269	-0.69427667555096	-0.595527125892344	1
ENSG00000012171	SEMA3B	-0.943583990692153	-0.262510528197482	1.60109638612688	0.249273394127466	-0.644275261364711	4
ENSG00000012174	MBTPS2	-1.49818096335355	-0.00641912533755697	0.747838131055561	1.05284609850599	-0.296084140870441	3
ENSG00000012211	PRICKLE3	0.520965372765261	1.4643367232679	-0.351709500833075	-0.565498580990765	-1.06809401420932	9
ENSG00000012232	EXTL3	0.815357004145021	1.14837192672639	-0.0526015552458791	-0.64940684308166	-1.26172053254387	8
ENSG00000012660	ELOVL5	0.604973055518407	1.23154526744902	0.198831200804591	-0.96090255060364	-1.07444697316837	8
ENSG00000012779	ALOX5	1.5469540805226	0.482677555914326	-0.659189155485496	-0.671641655371082	-0.698800825580344	9
ENSG00000012822	CALCOCO1	-0.792671386240307	-1.28679229427981	0.307942571536346	1.04679706846623	0.724724040517544	10
ENSG00000012963	UBR7	0.946442152092442	0.663719961536589	0.409923222983116	-0.53290870752466	-1.48717662908749	8
ENSG00000012983	MAP4K5	-0.540321075040143	0.0322748290019379	1.6179590315736	-1.04140620913229	-0.0685065764031109	4
ENSG00000013016	EHD3	0.859494175664149	-0.40432918375587	-0.733302792357893	-0.98373437058076	1.26187217103037	2
ENSG00000013275	PSMC4	1.46022021505956	-1.15389846998104	-0.482021821568438	-0.291949217678077	0.467649294167989	6
ENSG00000013288	MAN2B2	-0.755364883179134	-0.498095895490661	-0.0747306555194055	-0.406813583069048	1.73500501725825	2
ENSG00000013293	SLC7A14	-0.583457904536079	0.544106557089077	-0.739151995479774	-0.731940891897435	1.51044423482421	2
ENSG00000013297	CLDN11	-0.593178843321311	0.739240580157008	-0.759658493271134	-0.774018606366653	1.38761536280209	2
ENSG00000013306	SLC25A39	1.33176708561539	0.561234544274095	-0.00893157853920854	-1.20325568306294	-0.680814368287337	9
ENSG00000013364	MVP	-0.911717033639401	-0.485917809220204	-0.147136282981486	-0.154395946354597	1.69916707219569	2
ENSG00000013374	NUB1	1.61563059024812	-0.933185850219439	-0.00723461211465126	0.0437709098361965	-0.718981037750225	6
ENSG00000013375	PGM3	0.420997388038674	0.271485389150735	-1.56279460699399	1.11633451062587	-0.246022680821302	3
ENSG00000013392	RWDD2A	-0.824786361340868	-0.710058141573784	0.372021998064949	1.58167782634257	-0.418855321492862	3
ENSG00000013441	CLK1	-0.993670465243617	-0.305178057525325	0.857455204685815	1.24217644372665	-0.800783125643528	3
ENSG00000013503	POLR3B	1.66581615908863	-0.421508966593247	0.0641805759454093	-0.960182970308155	-0.348304798132635	6
ENSG00000013523	ANGEL1	0.503824481975741	0.313045284188409	0.228870636382436	0.711835285563957	-1.75757568811054	5
ENSG00000013561	RNF14	-0.632210649722653	-0.589616880917793	-0.726276633892139	0.330767945495562	1.61733621903703	2
ENSG00000013563	DNASE1L1	-0.708705781090382	0.0320544125831421	-0.771943041362769	-0.237887727710821	1.68648213758083	2
ENSG00000013573	DDX11	0.928247321231763	0.681509872056853	0.398999434818704	-0.50580582160802	-1.5029508064993	8
ENSG00000013583	HEBP1	1.08507347945773	0.871078356446827	-0.959144868259911	-1.0672159401797	0.07020897253505	9
ENSG00000013588	GPRC5A	-0.500341425911957	-0.558705733049129	-0.44927733104059	-0.270077682364343	1.77840217236602	2
ENSG00000013619	MAMLD1	-0.690910030834458	-0.842656448581538	-0.221524541375406	1.65963504200106	0.095455978790339	3
ENSG00000013810	TACC3	1.07233852241622	0.651723035215955	0.389715309344321	-0.916455469602852	-1.19732139737364	8
ENSG00000014123	UFL1	-1.11022796794097	0.653839537456537	0.116997466408468	1.23473214761952	-0.895341183543557	3
ENSG00000014138	POLA2	0.440746273591386	0.438640218993122	0.412755197933759	0.495891403019663	-1.78803309353793	5
ENSG00000014164	ZC3H3	1.01448529350627	0.399439811651161	0.274167122088869	-0.0343325434489716	-1.65375968379732	8
ENSG00000014216	CAPN1	1.49482161494593	-0.786314824575869	-0.747992528999273	-0.52198812985675	0.561473868485969	6
ENSG00000014257	ACPP	1.75810813138657	-0.539130577205677	-0.145371923894451	-0.639141708351429	-0.434463921935011	6
ENSG00000014641	MDH1	1.29068470175693	0.100295733363278	-0.732683656758963	-1.21531177745551	0.557014999094275	9
ENSG00000014824	SLC30A9	1.16731404516604	0.795887172983396	-0.00626221958000372	-1.18953488060479	-0.767404117964639	9
ENSG00000014914	MTMR11	-0.306816491038252	-1.35702125945223	1.05855087667648	-0.314057821362895	0.919344695176893	10
ENSG00000014919	COX15	0.132364059694952	1.22497318241573	0.510790872731384	-0.446179944302982	-1.42194817053908	8
ENSG00000015133	CCDC88C	1.31507292680097	0.492925210704879	0.186944204067555	-1.03463516755129	-0.960307174022118	9
ENSG00000015153	YAF2	-1.46588088282935	-0.0621713586596833	0.872823858452283	0.987479463625435	-0.332251080588686	3
ENSG00000015171	ZMYND11	-0.468375196842785	-1.37581102261231	1.27479993224167	0.508917881051381	0.0604684061620461	4
ENSG00000015285	WAS	-0.0573215625723803	1.41699230356947	0.414853536718187	-0.539213731979313	-1.23531054573597	1
ENSG00000015413	DPEP1	1.43178273862066	0.668943420924009	-0.582146782546869	-0.68656984788016	-0.832009529117638	9
ENSG00000015475	BID	0.857011654911562	-1.14571994757839	0.786543098902099	-1.02682711236625	0.528992306130985	2
ENSG00000015479	MATR3	0.866490987084483	0.768332598778505	0.450114049850121	-0.666454684693534	-1.41848295101957	8
ENSG00000015520	NPC1L1	-0.34992484630618	1.76694115854993	-0.592171849865536	-0.232672612512681	-0.592171849865536	1
ENSG00000015532	XYLT2	1.12508530624756	-0.984514378123018	1.03082695406521	-0.675764984941042	-0.495632897248715	7
ENSG00000015568	RGPD5	-0.70949783655773	-0.0695727075835561	1.45421340649326	0.420428200869521	-1.0955710632215	4
ENSG00000015592	STMN4	-0.671964217093576	-0.653088202709518	0.620786578591011	1.46760787028435	-0.763342029072267	3
ENSG00000015676	NUDCD3	-1.07543489096668	0.767088006898201	1.31916238833388	-0.549862146392637	-0.46095335787276	4
ENSG00000016082	ISL1	-0.538585100138251	-0.694222649734341	0.262638014347053	1.64447859253013	-0.674308857004596	3
ENSG00000016391	CHDH	1.58227564249939	0.384232139239166	-0.456501732837721	-0.742423509625987	-0.767582539274849	9
ENSG00000016402	IL20RA	-0.478126883319369	-0.66033663045914	-0.737228102990784	0.219258506286815	1.65643311048248	2
ENSG00000016864	GLT8D1	-0.0965283580012345	0.731639713260692	0.224682481453226	-1.66182237628488	0.802028539572191	2
ENSG00000017260	ATP2C1	0.832757304850331	0.790348475248342	-0.575786458125761	-1.47284237059539	0.42552304862248	9
ENSG00000017373	SRCIN1	1.14048061282844	0.999311471385925	-0.421028710141863	-0.707162088875055	-1.01160128519744	9
ENSG00000017427	IGF1	-0.91500359624284	-0.91500359624284	1.20164202307071	0.899063723507895	-0.270698554092922	4
ENSG00000017483	SLC38A5	1.02330553656281	-0.559201571786946	1.15047896164828	-0.888218982034278	-0.726363944389864	7
ENSG00000017621	MAGIX	-0.674363079941871	-0.720894588029696	-0.299521215406237	1.71332671976126	-0.0185478363834526	3
ENSG00000017797	RALBP1	1.34845906650529	0.222793089662751	-0.615195341323176	-1.28317862960672	0.327121814761847	9
ENSG00000018189	RUFY3	-0.733966308160869	-1.13369196932238	0.690005117117758	1.29822612644372	-0.120572966078223	3
ENSG00000018236	CNTN1	1.6978331522223	-0.93015698596628	-0.338620493880117	-0.0637592307051842	-0.365296441670717	6
ENSG00000018408	WWTR1	-1.11309980796897	-0.664177806124681	-0.184262890593376	0.555268624416475	1.40627188027055	10
ENSG00000018510	AGPS	0.51009532246915	1.17112198938621	-0.166295445838607	-1.5298364060125	0.0149145399957488	9
ENSG00000018607	ZNF806	0.361008622357134	1.20085147526588	-0.587204814745983	0.409288930529304	-1.38394421340633	1
ENSG00000018610	CXorf56	1.23995018124076	0.718250261666506	-0.301645068089634	-0.336565115047874	-1.31999025976975	9
ENSG00000018625	ATP1A2	-0.468796705666688	1.63771203767973	-0.565620463553066	-0.847641972870221	0.24434710441025	1
ENSG00000018699	TTC27	1.25628469510714	0.749700661284685	-0.114213366831799	-0.776693264581794	-1.11507872497823	9
ENSG00000018869	ZNF582	-0.514064087319695	1.77559497517033	-0.514064087319695	-0.233402713211248	-0.514064087319695	1
ENSG00000019102	VSIG2	1.78358000205858	-0.521580827520481	-0.388092023990251	-0.352326323027363	-0.521580827520481	6
ENSG00000019144	PHLDB1	0.222960107135815	-1.23355630959188	-0.773061537847844	0.545212357908715	1.2384453823952	10
ENSG00000019186	CYP24A1	-0.561610520791822	-0.33718058826324	1.74315657552535	-0.125676825576196	-0.718688640894097	4
ENSG00000019485	PRDM11	-0.704185064139593	-1.1940013457279	0.922919255142073	1.10046765718675	-0.125200502461332	3
ENSG00000019505	SYT13	1.67066717827261	0.0533381867834701	-0.317444597273031	-0.462398101228148	-0.944162666554899	6
ENSG00000019549	SNAI2	-1.75243202915933	0.626404315934545	0.577731982086666	0.112111961157175	0.436183769980945	4
ENSG00000019582	CD74	0.574935961281915	1.49302581409296	-0.590970330387136	-0.751238626313849	-0.725752818673889	9
ENSG00000019991	HGF	-0.730343217029049	-0.424357533313271	0.0680920151732344	-0.616765387873444	1.70337412304253	2
ENSG00000019995	ZRANB1	-0.252576211567093	-0.754246067289299	0.998643431909939	1.09266555229093	-1.08448670534448	3
ENSG00000020129	NCDN	0.797600037827399	-1.56441928095229	-0.215154234379166	0.050532885771684	0.931440591732372	2
ENSG00000020181	GPR124	-1.12402792073738	-0.38295430955197	1.36038863579338	-0.53023661062145	0.676830205117414	4
ENSG00000020256	ZFP64	1.10963726901045	0.980141590658573	-0.247082183884607	-1.07821208197867	-0.764484593805753	9
ENSG00000020426	MNAT1	-0.75742801366753	-0.638087228857952	0.661230778494516	1.44239441475983	-0.708109950728862	3
ENSG00000020577	SAMD4A	-1.04289377874913	-0.810897201269817	-0.228484861449601	1.17281294366143	0.909462897807117	10
ENSG00000020633	RUNX3	0.43331681739509	1.55321556301585	-0.426512636497096	-0.757491870538661	-0.802527873375181	1
ENSG00000020922	MRE11A	1.04530046897516	0.492696333226148	0.582406755570691	-0.863549802102917	-1.25685375566908	8
ENSG00000021300	PLEKHB1	1.44270958956193	0.651309390777256	-0.675632944989539	-0.5827102744275	-0.835675760922144	9
ENSG00000021355	SERPINB1	0.414494461741902	1.16359585965464	-1.38028239981737	-0.62306783135611	0.425259909776936	9
ENSG00000021488	SLC7A9	-0.710683607936962	-0.298891318928335	1.56144663548941	0.362498168124066	-0.914369876748179	4
ENSG00000021574	SPAST	1.31074281279641	-0.554591238456153	0.624974744564671	-0.129299651285128	-1.2518266676198	7
ENSG00000021645	NRXN3	-0.684955596424303	1.32780878348069	0.65543997987203	-0.151464192487102	-1.14682897444132	5
ENSG00000021762	OSBPL5	0.113163180937341	0.985716976268959	0.949090116586478	-1.11804088261071	-0.929929391182072	8
ENSG00000021776	AQR	1.17464487898868	0.264737729617638	0.452794174562439	-0.419336889980712	-1.47283989318805	8
ENSG00000021826	CPS1	-0.310859045999276	1.6644761426649	0.125872806586079	-0.633451316656292	-0.846038586595409	1
ENSG00000022267	FHL1	-1.0834126899109	-0.743906961762384	-0.22806258072235	1.26061682777977	0.794765404615859	10
ENSG00000022277	RTFDC1	-1.32213556151879	-0.702205464836619	0.251963862923974	1.13590727262087	0.636469890810572	10
ENSG00000022556	NLRP2	1.64508590824359	0.0257876035401507	-0.131969854398321	-0.555560409772975	-0.983343247612445	6
ENSG00000022567	SLC45A4	1.02547042830283	0.97405004033222	-0.0235603861488534	-0.834890681684221	-1.14106940080198	9
ENSG00000022840	RNF10	1.61994422614004	-0.470544326647906	-0.655693826384276	-0.795743509956759	0.302037436848905	6
ENSG00000022976	ZNF839	0.513749322890313	0.731156888456892	0.692113221135376	-0.317960569014952	-1.61905886346763	8
ENSG00000023041	ZDHHC6	0.986857678450379	0.385607071368846	0.729497726636701	-0.790089450688189	-1.31187302576774	8
ENSG00000023171	GRAMD1B	0.195675837007717	-1.64808326900834	0.11408057690904	1.07962581417126	0.25870104092033	10
ENSG00000023191	RNH1	-1.11002843529358	-0.498183810377973	-0.0935311085834443	0.12185299637624	1.57989035787875	10
ENSG00000023228	NDUFS1	0.731412319440388	-1.65348600211739	-0.195363662143548	0.373624116187299	0.743813228633247	10
ENSG00000023287	RB1CC1	1.48204873775316	-1.14432102563989	0.222689033863095	0.0988938947539647	-0.659310640730334	6
ENSG00000023318	ERP44	-0.280406443604297	-0.917896851879732	0.333505479679278	1.57118643409153	-0.706388618286783	3
ENSG00000023330	ALAS1	0.559733724569756	-1.16292779779447	-0.70547777814186	-0.0457666353620913	1.35443848672866	2
ENSG00000023445	BIRC3	-1.09460284470774	-0.52021314627239	-0.307763594540059	0.418911542205473	1.50366804331472	10
ENSG00000023516	AKAP11	-0.904876394966501	-0.944854880025298	0.377993398480375	1.46475945392006	0.00697842259135763	3
ENSG00000023572	GLRX2	-1.15486901373742	-0.902537962550451	0.180325269047758	0.769030209736568	1.10805149750354	10
ENSG00000023608	SNAPC1	-0.854241024638847	0.687535684526464	-1.22595819570304	0.293319612557353	1.09934392325807	2
ENSG00000023697	DERA	-0.02105358401938	1.43388590957676	-0.0822377752724541	-1.39039173954397	0.0597971892590438	1
ENSG00000023734	STRAP	1.17347359643399	0.797151742555187	-0.571521073106513	-1.28355817203817	-0.115546093844485	9
ENSG00000023839	ABCC2	-0.241695987244135	0.37251624241508	0.960184972359439	0.523542126760859	-1.61454735429124	5
ENSG00000023892	DEF6	1.6764317836372	-0.0110422327285608	-0.145947565748091	-0.842792885616576	-0.67664909954397	6
ENSG00000023902	PLEKHO1	-1.07648687435256	-1.07361624441981	0.851985739376115	0.40401777105496	0.8940996083413	10
ENSG00000023909	GCLM	0.65670936886717	-0.734180981883642	-0.595695520464187	-0.769825250736753	1.44299238421741	2
ENSG00000024048	UBR2	-0.194438963556522	0.830818605307896	0.330274139285967	0.677630292422914	-1.64428407346026	5
ENSG00000024422	EHD2	-0.603914507531456	-1.41066396100438	0.272239241567314	0.707879593656487	1.03445963331203	10
ENSG00000024526	DEPDC1	0.905169127065926	0.796133431052521	0.458029130088788	-1.02631297393994	-1.13301871426729	8
ENSG00000024862	CCDC28A	1.1028970608493	-0.221685173899409	0.849124759557941	-0.357020488256628	-1.3733161582512	7
ENSG00000025039	RRAGD	-1.08212045902052	-0.923770728805584	0.388374441682824	1.31701423078103	0.300502515362249	10
ENSG00000025156	HSF2	-0.807806955861229	0.820515614525652	0.782049428524146	0.537174467755133	-1.3319325549437	5
ENSG00000025293	PHF20	1.21471000189357	0.727811781477983	-0.077255951341044	-0.579650743693658	-1.28561508833685	8
ENSG00000025423	HSD17B6	1.50426908427708	-0.189763328893295	-0.222545179635793	-1.27242680848733	0.180466232739341	6
ENSG00000025434	NR1H3	1.20989168873066	0.772025450702893	-0.495767550960719	-0.199920561645481	-1.28622902682735	9
ENSG00000025708	TYMP	-0.829984880065679	0.313455185978679	0.360353483844533	-1.16102867864124	1.3172048888837	2
ENSG00000025770	NCAPH2	0.706018519688801	0.750762021205171	0.70466816320317	-0.851152177211742	-1.3102965268854	8
ENSG00000025772	TOMM34	-0.02086206582723	1.65144185578057	-0.0458303654535497	-0.877488693362358	-0.707260731137433	1
ENSG00000025796	SEC63	-1.19757252882317	-0.468038139626807	0.942668808332161	1.13503844143237	-0.412096581314555	3
ENSG00000025800	KPNA6	1.73516493031949	-0.288213317266837	-0.564618577616352	-0.755877351213571	-0.12645568422273	6
ENSG00000026025	VIM	-1.71979285812599	0.777041085055736	0.470087902969055	0.466366143057675	0.00629772704352104	5
ENSG00000026036	RTEL1-TNFRSF6B	-0.150809888851784	-0.334946468208443	1.74991818338503	-0.588486012375771	-0.675675813949035	4
ENSG00000026103	FAS	-0.204273363109752	0.0791037731608037	-0.832805088939364	-0.704142604251099	1.66211728313941	2
ENSG00000026297	RNASET2	1.19748098020189	0.672050391732302	0.160771429669112	-1.13235930866245	-0.897943492940857	9
ENSG00000026508	CD44	-0.530880954428813	-0.23958821368103	-0.531198770501689	-0.474204042297127	1.77587198090866	2
ENSG00000026559	KCNG1	0.908374922560681	1.03990183896656	-0.103734344118181	-1.3590377289511	-0.485504688457962	9
ENSG00000026652	AGPAT4	0.387116367387611	1.21250294395704	0.474544596789469	-1.0801342231765	-0.994029684957626	8
ENSG00000026950	BTN3A1	-0.866463131180913	-1.14909397238382	1.12896413534134	0.0818818189438762	0.804711149279521	10
ENSG00000027001	MIPEP	0.6299280600532	1.05755953729173	0.267242943352741	-1.47879020496067	-0.475940335737004	9
ENSG00000027075	PRKCH	0.395369154776198	-1.68553852929932	0.853203223988343	-0.0808642547009553	0.517830405235732	10
ENSG00000027644	INSRR	-0.971535419056639	-0.823262777785872	1.06769835252892	1.06141827092945	-0.334318426615858	3
ENSG00000027697	IFNGR1	1.34481124350292	-1.43707344037644	-0.213156586143504	0.0218915800556928	0.28352720296132	6
ENSG00000027847	B4GALT7	-0.465186590310419	-0.615542964313677	0.100738324554223	-0.717143291582354	1.69713452165223	2
ENSG00000027869	SH2D2A	1.45328535618108	0.566098160541258	-0.305471456910682	-0.804828969896781	-0.909083089914877	9
ENSG00000028116	VRK2	1.24015663361059	0.734357752090428	-0.265814091676533	-1.29720719918756	-0.411493094836926	9
ENSG00000028137	TNFRSF1B	0.972653101379334	1.1711565923093	-0.682644807881605	-1.00337617008779	-0.457788715719239	9
ENSG00000028203	VEZT	-0.687133505733029	-1.39465276076242	0.952619602088595	0.42710890201817	0.702057762388685	10
ENSG00000028277	POU2F2	1.75028225365908	-0.716026942405751	-0.465706926080606	-0.434791427703226	-0.1337569574695	6
ENSG00000028310	BRD9	0.875604439438372	0.670915143304077	0.56987195729591	-0.727379270252424	-1.38901226978593	8
ENSG00000028528	SNX1	-0.739366325048382	0.934014729559998	1.225658565937	-0.897341969034361	-0.522965001414252	4
ENSG00000028839	TBPL1	1.35370630047222	0.464686553067295	0.136068595071107	-1.08463468103654	-0.86982676757408	9
ENSG00000029153	ARNTL2	1.6437699302397	-0.205673558868626	-0.591840686419381	-0.946276513201568	0.10002082824987	6
ENSG00000029363	BCLAF1	0.888943481690343	-0.246820454117036	1.1190838234407	-0.464919795883628	-1.29628705513038	7
ENSG00000029364	SLC39A9	-0.651703489902626	0.559922216036238	1.45571927744696	-0.356018376923995	-1.00791962665657	5
ENSG00000029534	ANK1	-0.0203519343911043	-1.24190920847976	-0.704488543550536	1.09932967093778	0.867420015483619	10
ENSG00000029639	TFB1M	0.922204312591385	1.18486117194223	-0.285646236152135	-0.859399792548097	-0.962019455833379	9
ENSG00000029725	RABEP1	-1.05654318804881	0.591940392240417	0.893453731583214	-1.12082133360627	0.691970397831454	4
ENSG00000029993	HMGB3	1.07438630607339	0.433221840993867	0.55949233241607	-0.710650072789549	-1.35645040669377	8
ENSG00000030066	NUP160	0.851881725713664	0.875206766704236	0.334211159206106	-0.661776260020341	-1.39952339160367	8
ENSG00000030110	BAK1	1.59672751246707	-0.110178954864918	-1.08429680345935	-0.502555017988431	0.100303263845629	6
ENSG00000030304	MUSK	-1.03402390618681	-1.04093438133694	0.179931014459087	1.04577558845461	0.849251684610049	10
ENSG00000030419	IKZF2	0.888262831296085	0.991034884767978	-1.17397426814363	0.195919552768325	-0.90124300068876	9
ENSG00000030582	GRN	0.705855422695149	-0.334843158880017	-1.00623644318776	-0.725312050070293	1.36053622944292	2
ENSG00000031003	FAM13B	-1.38533946101811	-0.0792225498535668	1.13584677063369	0.768668642854552	-0.439953402616569	4
ENSG00000031081	ARHGAP31	-0.995937423537125	-0.886532792973176	-0.0809356003594208	1.36126613315305	0.602139683716672	10
ENSG00000031544	NR2E3	1.5140386887959	0.537477057822172	-0.765827615093747	-0.588916617590612	-0.696771513933711	9
ENSG00000031691	CENPQ	1.12088995679123	0.438832121314376	0.485788360915104	-0.688850094964957	-1.35666034405575	8
ENSG00000031698	SARS	-0.475564406861084	1.74920551590146	-0.762988586410512	-0.283468539473625	-0.227183983156239	1
ENSG00000031823	RANBP3	0.585980150533506	0.725655114556893	0.792531006262698	-0.672485537383053	-1.43168073397005	8
ENSG00000032219	ARID4A	-0.885597995514131	0.557817892177907	0.670086297528668	0.92359641262749	-1.26590260681993	5
ENSG00000032389	TSSC1	-0.179960536676278	1.31495616367951	0.704779440984042	-1.07705668174992	-0.76271838623735	1
ENSG00000032444	PNPLA6	1.48292633092823	0.369117884880929	-0.226735580186192	-1.19505357268988	-0.430255062933088	9
ENSG00000032742	IFT88	-1.20427356839864	0.602121738814201	1.37386899028019	-0.416557876708611	-0.35515928398714	4
ENSG00000033011	ALG1	1.32281514750789	0.589507550756891	-0.504710828330805	-1.27705209705637	-0.130559772877613	9
ENSG00000033030	ZCCHC8	0.837559927739489	0.540825936916422	0.385665269274104	-0.0753891024038805	-1.68866203152613	8
ENSG00000033050	ABCF2	-0.190971076352013	-0.330686794687495	0.247138964378355	-1.23303582671768	1.50755473337883	2
ENSG00000033100	CHPF2	-0.728334278999346	-0.907277118200229	-0.256987729065294	0.318060361249352	1.57453876501552	10
ENSG00000033122	LRRC7	-0.622484833381515	-0.624233164721046	0.0990054949280877	1.70399374438952	-0.556281241215049	3
ENSG00000033170	FUT8	1.74372015228456	-0.675330604498246	-0.488554572153005	-0.509665907252737	-0.0701690683805652	6
ENSG00000033178	UBA6	0.824944897371544	0.533871123981972	-0.220968382203831	0.512342079357021	-1.6501897185067	8
ENSG00000033327	GAB2	-1.73316686448678	0.187422128866744	0.696342205798086	0.184523446361446	0.664879083460501	10
ENSG00000033627	ATP6V0A1	1.08110578508276	-0.055816046936626	-1.09208031859816	-0.870270836525711	0.937061416977744	2
ENSG00000033800	PIAS1	-0.216379017333911	0.351185499657617	0.983291061162241	0.498759456706688	-1.61685700019263	5
ENSG00000033867	SLC4A7	0.990569969068333	0.0927225799457389	0.182350761620184	0.410249618471987	-1.67589292910624	7
ENSG00000034053	APBA2	-0.0700423654563881	0.551692852480745	1.34221630700542	-0.575823736643884	-1.24804305738589	8
ENSG00000034063	UHRF1	0.527546761699068	0.52246520949161	1.07870148444045	-0.965824655714184	-1.16288879991694	8
ENSG00000034152	MAP2K3	0.803964850995971	-0.103313841537222	-0.0132870364111524	-1.58998764876147	0.902623675713873	2
ENSG00000034239	EFCAB1	-0.683734153886524	1.73931143123217	-0.104911831831862	-0.326311809981341	-0.62435363553244	1
ENSG00000034510	TMSB10	-0.170698022158472	-0.453833849894818	0.63984233182818	-1.30291227141091	1.28760181163602	2
ENSG00000034533	ASTE1	0.955427108819231	-0.0640580622429953	0.961300654370472	-0.455822286401509	-1.3968474145452	8
ENSG00000034677	RNF19A	-1.47938106329536	-0.157257824368628	0.00575415181069723	1.2933419521257	0.337542783727594	10
ENSG00000034693	PEX3	0.0983255814617841	1.01715578475684	0.318174279691873	-1.67254929435341	0.238893648442914	9
ENSG00000034713	GABARAPL2	-0.948034324091903	-0.706332668260406	-0.365634116111495	0.54716444061845	1.47283666784535	10
ENSG00000035115	SH3YL1	-0.274176814335146	-1.15916280274068	0.904378379449301	1.16541580586957	-0.636454568243046	3
ENSG00000035141	FAM136A	1.57496914496014	0.313807087967987	-0.261901762303793	-0.933945532292389	-0.692928938331944	9
ENSG00000035403	VCL	1.24066349652823	-1.10721915187914	-0.431045825628906	-0.559978496494922	0.857579977474737	6
ENSG00000035499	DEPDC1B	1.05017886526574	0.858522096798856	0.140269328989138	-0.880872735213899	-1.16809755583983	8
ENSG00000035664	DAPK2	1.0839855188345	-1.38080559962949	-0.404893350813635	-0.153232460535482	0.854945892144107	2
ENSG00000035681	NSMAF	0.754569810336161	0.223044597762325	1.04552655986597	-1.35884561498433	-0.664295352980124	8
ENSG00000035687	ADSS	1.21787090221842	0.663742502454884	0.0347824382381474	-1.30369757745459	-0.612698265456865	9
ENSG00000035862	TIMP2	-0.533597775972599	-1.05908236207279	0.571541704912388	-0.423667421967489	1.44480585510049	2
ENSG00000035928	RFC1	0.854092468709595	0.870150909580199	0.373738294208217	-0.754950373196841	-1.34303129930117	8
ENSG00000036054	TBC1D23	0.0325830917768864	-1.53323627408662	-0.253761153180785	1.02678209345855	0.727632242031968	10
ENSG00000036257	CUL3	0.17170653645194	0.109036743654396	1.09243645821967	0.267977871165271	-1.64115760949128	5
ENSG00000036448	MYOM2	-1.00297674514745	-0.63950568155243	-0.512084620710254	1.04761963745592	1.10694740995422	10
ENSG00000036530	CYP46A1	0.120771428601136	-1.67618386037178	0.632290978108666	0.879862913150681	0.0432585405113001	10
ENSG00000036549	ZZZ3	0.502159236428689	0.585687097978883	0.483932049335044	0.197821347961559	-1.76959973170417	8
ENSG00000036672	USP2	-0.180419937729749	-1.44143093366541	0.293567285961563	1.3428814764281	-0.0145978909945068	3
ENSG00000037042	TUBG2	0.143647247640448	0.891397465402178	-0.0726182776306452	0.684198789028953	-1.64662522444094	5
ENSG00000037241	RPL26L1	-0.293983752499815	-0.571917265385095	-0.288861981205761	1.7682434056033	-0.613480406512625	3
ENSG00000037280	FLT4	1.3291086411281	0.688937793743889	-0.155426950471611	-0.932239167578039	-0.930380316822335	9
ENSG00000037474	NSUN2	1.71083218890788	-0.459491373436562	0.0435965867283861	-0.543572601673964	-0.751364800525742	6
ENSG00000037637	FBXO42	-0.195914999894112	0.178246720530641	1.38380079413257	0.0523865819056215	-1.41851909667472	5
ENSG00000037749	MFAP3	-0.651554487794227	1.14393390834233	-0.453648135267744	-1.0343398482036	0.995608562923248	2
ENSG00000037757	MRI1	-0.461946379399769	0.941606094618025	0.561960513827192	0.489560494525849	-1.5311807235713	5
ENSG00000037897	METTL1	1.28729892725132	0.461101825895427	0.212161940503832	-1.26605297871684	-0.694509714933741	9
ENSG00000037965	HOXC8	-1.342241254374	0.848604938336308	0.22668266419874	-0.700561817467154	0.967515469306107	2
ENSG00000038002	AGA	0.861384477417673	0.897263394166238	-0.539011836840849	-1.45203099360638	0.232394958863319	9
ENSG00000038210	PI4K2B	1.11023547370278	-0.506098408232045	0.915572675851559	-1.26887816109884	-0.250831580223454	6
ENSG00000038219	BOD1L1	0.417043719314503	-1.05526714124483	0.862659418147987	0.873459121152535	-1.09789511737019	7
ENSG00000038274	MAT2B	0.730994595960052	0.698169107736976	0.750218877297517	-0.94734625782281	-1.23203632317173	8
ENSG00000038295	TLL1	-0.463484663906703	-1.33972571972729	1.07638234272791	0.896132761424471	-0.169304720518386	3
ENSG00000038358	EDC4	-0.0859784032023172	-0.227161110211584	0.403533681133797	1.32849876304394	-1.41889293076383	3
ENSG00000038382	TRIO	-1.18841399598217	-0.903919821225939	1.13702578634394	0.374051951696115	0.581256079168052	10
ENSG00000038427	VCAN	0.391083160258057	0.19145409662951	0.423685669138354	-1.75304095222086	0.746818026194942	2
ENSG00000038532	CLEC16A	-0.754319875160734	-0.841731432167814	0.270952362911505	1.60359435233468	-0.278495407917636	3
ENSG00000039068	CDH1	1.78583780173234	-0.482954405426636	-0.515875598883287	-0.364177135697162	-0.422830661725257	6
ENSG00000039123	SKIV2L2	0.967756506936565	0.779966725859044	0.235805411260231	-0.526843835836974	-1.45668480821887	8
ENSG00000039139	DNAH5	1.53245229005985	-0.576827404609035	-0.63604209331056	-0.816770847424339	0.497188055284083	6
ENSG00000039319	ZFYVE16	-0.600404645719278	1.08951483091246	0.306708907917476	0.61247090801237	-1.40829000112302	5
ENSG00000039523	FAM65A	-1.46122594395119	0.319255199251259	0.196366361146257	1.27194275688012	-0.326338373326443	3
ENSG00000039560	RAI14	0.721450988010745	-0.678881477993944	0.0412329252270177	-1.2693817332587	1.18557929801488	2
ENSG00000039600	SOX30	-0.69899223091319	-0.702041690665462	0.136456751748896	1.68118066024136	-0.416603490411608	3
ENSG00000039650	PNKP	1.10903577966419	0.678431695998037	0.311239923207077	-1.12220083547144	-0.976506563397875	8
ENSG00000039987	BEST2	1.78263151014835	-0.509743506928384	-0.456915636060174	-0.306228860231411	-0.509743506928384	6
ENSG00000040199	PHLPP2	-0.119387670500092	-0.908984555393485	0.533883756228723	1.42031762846729	-0.925829158802437	3
ENSG00000040275	SPDL1	1.04976750230928	0.530391313868095	0.550311600001054	-1.21419542268886	-0.916274993489572	8
ENSG00000040341	STAU2	1.70265767720597	-0.511113272365148	-0.0224717011376839	-0.30538622518147	-0.863686478521668	6
ENSG00000040487	PQLC2	-0.146926053247653	-1.24823194505355	1.54597001764061	-0.172705336986458	0.0218933176470598	4
ENSG00000040531	CTNS	0.777036315521397	0.974667930658959	0.200705646476964	-1.47620596548017	-0.476203927177148	9
ENSG00000040608	RTN4R	1.20758636388894	-0.263431368459253	0.833644813024635	-0.574981655228978	-1.20281815322535	7
ENSG00000040633	PHF23	1.51998974144818	-0.423223130946911	0.407340990819839	-1.07871635311013	-0.425391248210983	6
ENSG00000040731	CDH10	0.261577812368213	1.59103414055918	-0.404887718979119	-1.03070134025817	-0.4170228936901	1
ENSG00000040933	INPP4A	1.14357368615268	0.10057661528472	0.728754131724619	-0.66640141350737	-1.30650301965465	8
ENSG00000041353	RAB27B	-0.556805900145051	-0.204772281150075	-0.624162606542519	-0.379117893678541	1.76485868151619	2
ENSG00000041357	PSMA4	1.38752795682614	0.490609013058017	-0.180343224942504	-1.27333384445133	-0.424459900490323	9
ENSG00000041515	MYO16	-0.770246579114604	0.000419535665765362	-0.130247122213754	1.67165260472444	-0.771578439061845	3
ENSG00000041802	LSG1	1.66612082962581	-0.225102832480942	0.0761992498690596	-0.667532603344696	-0.849684643669231	6
ENSG00000041880	PARP3	-1.04208888506437	-1.131153154991	0.806122496395337	0.525126989464832	0.841992554195201	10
ENSG00000041982	TNC	-0.26138632668275	-1.6187339334839	0.776113113598941	0.775174120035106	0.328833026532604	10
ENSG00000041988	THAP3	-0.593850521771796	0.770418119294204	0.0551234165458706	1.1137720199235	-1.34546303399178	5
ENSG00000042062	FAM65C	1.14839957968886	0.997744039686267	-0.78338100587413	-0.949185774505027	-0.413576838995974	9
ENSG00000042088	TDP1	0.967288282099239	0.231748179686278	0.819092347843662	-0.619634090058591	-1.39849471957059	8
ENSG00000042286	AIFM2	0.649045672576051	-1.18476942752653	-0.478636938947656	-0.338840926578034	1.35320162047617	2
ENSG00000042317	SPATA7	-0.622667204757942	1.32902732774301	0.411434313970184	0.166348091012553	-1.28414252796781	5
ENSG00000042429	MED17	-0.383557279171174	0.317422045411305	1.28544343534221	0.213876708588279	-1.43318491017062	5
ENSG00000042445	RETSAT	-0.3755748447608	1.00550940526291	-0.464066318902477	-1.22722007430649	1.06135183270686	2
ENSG00000042493	CAPG	1.09674711258997	0.618833551103322	-0.409376575524805	-1.48782267594019	0.181618587771704	9
ENSG00000042753	AP2S1	0.510606547824146	0.607102130943354	-0.266073733457505	-1.63769033815091	0.786055392840914	9
ENSG00000042832	TG	-0.920092910930562	-0.906607687479598	0.980699391768456	1.1342885964796	-0.288287389837894	3
ENSG00000042980	ADAM28	-0.472612118301721	-0.61564993188363	1.74752239689696	-0.0781681315121216	-0.581092215199488	4
ENSG00000043039	BARX2	-0.646550406306902	-0.625285666588736	1.65290158240031	0.248956326394498	-0.630021835899171	4
ENSG00000043093	DCUN1D1	1.49047823048687	-0.920010651948693	0.352767064197479	-0.0249084135187152	-0.898326229216946	7
ENSG00000043143	JADE2	1.6740166920635	0.0560891892388456	-0.501460963427771	-0.921140688995309	-0.307504228879269	6
ENSG00000043355	ZIC2	1.77515955272483	-0.389951754738331	-0.273319193848878	-0.511815651429266	-0.600072952708353	6
ENSG00000043514	TRIT1	0.114401904415684	1.21497185366128	0.655841485678644	-0.757993297165994	-1.22722194658961	8
ENSG00000044090	CUL7	-1.48014481209116	0.136424344739594	0.379513213285426	1.25076533414059	-0.286558080074446	3
ENSG00000044115	CTNNA1	1.02794557562325	-1.01436279721235	-0.493575577463128	-0.641928374745781	1.12192117379801	2
ENSG00000044446	PHKA2	0.989496840039829	0.544357648045411	0.407212820748861	-0.389638946026975	-1.55142836280713	8
ENSG00000044459	CNTLN	1.27082863602969	-0.457373959469333	0.814129464769048	-1.1207788660547	-0.506805275274698	6
ENSG00000044524	EPHA3	-0.849952288913681	-0.701097612806197	0.948704574613039	1.22437170153288	-0.622026374426045	3
ENSG00000044574	HSPA5	0.161620262002508	-1.58308466402406	-0.164412806226533	1.09558279023243	0.490294418015648	10
ENSG00000046604	DSG2	0.883450833575785	1.27332429494797	-0.5493988916614	-0.756298568022742	-0.851077668839616	9
ENSG00000046647	GEMIN8	0.585969608337926	1.23699219664034	0.176880950787493	-0.781383590636253	-1.21845916512951	8
ENSG00000046651	OFD1	0.0578566983760576	-0.382043801071921	0.43339425455343	1.29759860119326	-1.40680575305083	3
ENSG00000046653	GPM6B	0.664798891782276	-0.844644249550218	0.720181986456792	0.773856253234935	-1.31419288192379	7
ENSG00000046889	PREX2	0.870793511514211	0.924357718024994	0.136377985879846	-0.464127308761836	-1.46740190665721	8
ENSG00000047056	WDR37	-1.55717186135379	-0.251641971773884	1.12026115445337	0.443912332878003	0.244640345796308	4
ENSG00000047188	YTHDC2	0.988538813055649	0.351619326812101	0.618700707490542	-0.432711806115694	-1.5261470412426	8
ENSG00000047230	CTPS2	1.03717439421911	0.647743125605369	0.333805941720119	-0.58766900770002	-1.43105445384458	8
ENSG00000047249	ATP6V1H	0.325224176301805	0.984827766975019	-1.13022908522125	-0.992894703879568	0.813071845823997	9
ENSG00000047315	POLR2B	0.861056451834161	1.00695197148027	0.223589758792495	-1.10598902357277	-0.985609158534167	8
ENSG00000047346	FAM214A	-0.750858561844173	-1.31070576786032	0.27947249243197	0.729442580273206	1.05264925699932	10
ENSG00000047365	ARAP2	1.73046507845064	-0.866307820282724	-0.347573454363148	-0.277845078437146	-0.238738725367617	6
ENSG00000047410	TPR	1.0753911863946	0.623827563526389	0.417877513295126	-0.919438359791005	-1.19765790342512	8
ENSG00000047457	CP	1.57434261014548	-0.835151707457753	-0.603924418679804	-0.54202430277822	0.4067578187703	6
ENSG00000047578	KIAA0556	-0.0496627510499892	0.278633426485703	1.31534798705416	-0.0660089817802198	-1.47830968070966	5
ENSG00000047579	DTNBP1	0.266541880588658	-0.796051846718897	0.0239972871486652	1.51111031972283	-1.00559764074125	3
ENSG00000047597	XK	1.78575973126836	-0.523398114798242	-0.482623221122098	-0.379983868903743	-0.399754526444274	6
ENSG00000047617	ANO2	0.305863413248702	-0.934194025908614	-0.20451211563861	-0.7335982843589	1.56644101265742	2
ENSG00000047621	C12orf4	-1.42470414198662	0.183184548323938	0.784608541591147	-0.551501880099716	1.00841293217125	2
ENSG00000047634	SCML1	-1.62559516757817	0.767381075946763	0.820377106070363	0.236670898648679	-0.198833913087638	4
ENSG00000047644	WWC3	0.831566043496577	-0.381377052394399	0.916884841964668	0.149507564049035	-1.51658139711588	7
ENSG00000047648	ARHGAP6	-1.47203639913469	-0.508124345342276	0.284205336065312	0.680625616401851	1.0153297920098	10
ENSG00000047662	FAM184B	-0.214483236840219	-1.01243691834015	-0.469282324528901	0.0511724157758348	1.64503006393344	2
ENSG00000047849	MAP4	-1.09170078927821	-0.709112147433928	-0.301956220256239	1.01044116417384	1.09232799279454	10
ENSG00000047932	GOPC	-1.00417157759851	-0.236155039669164	0.803634818500932	1.26588860851749	-0.82919680975074	3
ENSG00000048028	USP28	1.53139644648008	-0.376158561543752	0.0589744473400124	0.0144627684621926	-1.22867510073854	6
ENSG00000048052	HDAC9	-0.159660279803104	-1.22267351872349	-0.626637086084941	1.19012220644486	0.818848678166675	10
ENSG00000048140	TSPAN17	1.21175627943654	-1.27202329400953	-0.0862781265159692	-0.595839454620122	0.742384595709092	6
ENSG00000048162	NOP16	1.2984298421949	0.711974021557583	-0.26618701903123	-1.20011086725963	-0.544105977461615	9
ENSG00000048342	CC2D2A	0.11515414479625	0.33035920335285	1.08333270318981	-1.64058153003624	0.111735478697326	8
ENSG00000048392	RRM2B	0.406282442398257	-0.374035031207646	-1.11847571560413	-0.419719810991911	1.50594811540543	2
ENSG00000048405	ZNF800	-1.50696678992969	-0.291103179068424	0.835106542992007	0.973039347021943	-0.0100759210158357	3
ENSG00000048471	SNX29	-1.3406302977926	-0.213406542664745	0.76053434595361	1.19171428300306	-0.398211788499318	3
ENSG00000048540	LMO3	-0.6091109288968	-0.496761187696174	1.63198363933611	0.275667234450451	-0.801778757193583	4
ENSG00000048544	MRPS10	0.0216507464143343	-0.923063662902604	0.117756470192788	-0.796986190506891	1.58064263680238	2
ENSG00000048545	GUCA1A	1.73422887032077	-0.0579567269106195	-0.565150528293295	-0.393695892070849	-0.71742572304601	6
ENSG00000048649	RSF1	0.610728994558203	0.0360262334532462	0.856123167304016	0.187561226346817	-1.69043962166228	7
ENSG00000048707	VPS13D	1.18844646003099	-0.77134294232864	0.994044405268203	-0.639122599337736	-0.772025323632817	7
ENSG00000048740	CELF2	-0.368635516904184	-1.50618124698681	0.860036227376477	0.920290877276992	0.0944896592375248	10
ENSG00000048828	FAM120A	-0.579865047736497	0.00876047339158606	1.15372476375928	-1.33123216088606	0.74861197147169	4
ENSG00000048991	R3HDM1	0.714855846431024	0.790013297068002	0.446336128541468	-0.358333179940315	-1.59287209210018	8
ENSG00000049089	COL9A2	-0.400666605258085	1.60758075127189	0.247535874038443	-0.466299771480593	-0.988150248571658	1
ENSG00000049130	KITLG	0.588195863617385	-0.17129919838997	-0.759463967946654	-1.0512588864686	1.39382618918784	2
ENSG00000049167	ERCC8	0.368280764210527	1.12707903317457	0.570089756283753	-0.771938588458135	-1.29351096521072	8
ENSG00000049192	ADAMTS6	-0.833007897511285	1.21369423972933	-0.270636028476241	-0.991439792447724	0.881389478705918	1
ENSG00000049239	H6PD	-1.23032089004095	0.170195753646381	1.3378151804037	-0.699665214125045	0.42197517011592	4
ENSG00000049245	VAMP3	-0.827419619587068	0.84461685314238	-0.773624972606725	-0.548450062022909	1.30487780107432	2
ENSG00000049246	PER3	1.61754160978999	-0.783419893830598	-0.0779936142833273	0.110742942569065	-0.866871044245127	6
ENSG00000049283	EPN3	1.78097006919251	-0.45391367729823	-0.304009627124014	-0.455070785613568	-0.567975979156694	6
ENSG00000049323	LTBP1	-0.544332739286009	0.146279418530979	0.0350968586441925	-1.16299261550001	1.52594907761085	2
ENSG00000049449	RCN1	-1.54446387971383	0.0468789075808451	1.07424004817016	0.641109039876309	-0.217764115913474	4
ENSG00000049540	ELN	-0.710282164489911	0.2494940002528	1.37011716850038	-1.21050552914349	0.301176524880224	4
ENSG00000049541	RFC2	0.891839160078351	0.819777764424129	0.393442681272153	-0.767791138382588	-1.33726846739204	8
ENSG00000049618	ARID1B	0.943426366847363	0.192978784475752	0.759179336946916	-0.356297384754438	-1.5392871035156	8
ENSG00000049656	CLPTM1L	0.641824616600937	-1.22471106418746	-0.297801688165852	-0.457334139801808	1.33802227555418	2
ENSG00000049759	NEDD4L	-0.21358934169976	-1.07722492089719	1.18231320526125	0.887981692729048	-0.779480635393354	3
ENSG00000049768	FOXP3	1.24280977241064	0.398881422137374	0.0606898255191416	-0.201735485797762	-1.50064553426939	8
ENSG00000049769	PPP1R3F	-0.982170065087439	-0.350415507848957	-0.295286849938008	1.68006908195456	-0.05219665908016	3
ENSG00000049860	HEXB	0.635392455014531	0.420209315515661	-0.662455505928631	-1.4014738064736	1.00832754187204	2
ENSG00000049883	PTCD2	0.915104250190738	1.11314299919122	-0.122480810563642	-0.737798973106704	-1.16796746571161	9
ENSG00000050030	KIAA2022	1.43298891438001	0.0663819554784651	0.290812085108889	-0.537889131272451	-1.25229382369492	8
ENSG00000050130	JKAMP	-0.879326091185189	0.518419122173118	-0.117455676205433	-0.950317730161701	1.42868037537921	2
ENSG00000050165	DKK3	-0.104398059344953	-0.87936871554881	-0.205821234615325	-0.515586450431104	1.70517445994019	2
ENSG00000050327	ARHGEF5	1.70677611363259	0.0910068476349789	-0.583566012094585	-0.628583591761189	-0.585633357411794	6
ENSG00000050344	NFE2L3	1.53939165773743	-0.590501033202445	-0.391525824101887	-0.976164164335035	0.418799363901934	6
ENSG00000050393	MCUR1	1.06857655872557	-0.121310182327799	0.895685159969846	-0.507385868937439	-1.33556566743018	8
ENSG00000050405	LIMA1	-1.16200107769103	-0.894700102786186	0.177247913451277	0.778984437389446	1.10046882963649	10
ENSG00000050426	LETMD1	-0.00381887977185223	1.57854351043741	0.118574629878867	-0.67273202609975	-1.02056723444467	1
ENSG00000050438	SLC4A8	1.77325020735645	-0.336235269551166	-0.304002750686455	-0.630746132146388	-0.502266054972446	6
ENSG00000050555	LAMC3	1.73220758053117	-0.595237228874445	-0.0028847594749536	-0.534901294275986	-0.59918429790579	6
ENSG00000050748	MAPK9	1.40667009199846	0.224996593230947	0.217335110883712	-0.597379044709887	-1.25162275140323	8
ENSG00000050767	COL23A1	-0.257927840620253	-0.675329990253569	1.22551902639562	0.836925210938568	-1.12918640646036	7
ENSG00000050820	BCAR1	1.32845856759101	-0.892593596588731	-0.766242279943177	-0.465989882402759	0.796367191343662	6
ENSG00000051009	FAM160A2	0.762481163957801	0.51928412296053	0.726934722308126	-0.455216814840335	-1.55348319438612	8
ENSG00000051108	HERPUD1	-1.49287494900844	-0.315487307138742	-0.0199124827195821	0.921257000750458	0.907017738116304	10
ENSG00000051128	HOMER3	-1.65721256597747	-0.115300554005647	0.305342286453268	0.545405643495444	0.921765190034407	10
ENSG00000051180	RAD51	1.06086802130039	0.468931953967135	0.584543574677097	-0.860008962000054	-1.25433458794457	8
ENSG00000051341	POLQ	0.811375335021385	0.666072449449903	0.691990340659931	-0.903148089046071	-1.26629003608515	8
ENSG00000051382	PIK3CB	1.67202553731975	0.0733610119808101	-0.504143093261874	-0.915957001402544	-0.325286454636145	6
ENSG00000051523	CYBA	1.09610673828999	0.765459488503133	-0.856689205895593	-1.20022661606315	0.195349595165625	9
ENSG00000051596	THOC3	0.954557443338753	0.841487788542101	0.297621092580712	-0.822756461902564	-1.270909862559	8
ENSG00000051620	HEBP2	0.709805102063032	0.982811901281167	-1.32199165504687	-0.782771448195703	0.412146099898369	9
ENSG00000051825	MPHOSPH9	0.635613903786935	0.967896276814127	0.27707632741394	-0.302289467041917	-1.57829704097309	8
ENSG00000052126	PLEKHA5	1.12187713778141	0.943264167770675	-0.16930846770334	-1.06168804490033	-0.834144792948419	9
ENSG00000052344	PRSS8	1.43836764925387	0.667951357280984	-0.640202232034186	-0.7201860574554	-0.745930717045272	9
ENSG00000052723	SIKE1	0.356662264006724	1.1361514882364	0.480286649371086	-0.536709138751498	-1.43639126286271	8
ENSG00000052749	RRP12	1.76962159148325	-0.576694559805979	-0.270726761617805	-0.324456146611763	-0.597744123447701	6
ENSG00000052795	FNIP2	0.21638490706926	-0.341063483865268	1.48942504516549	-1.26854720381177	-0.0961992645577124	4
ENSG00000052802	MSMO1	1.25637526173734	0.395750520093768	-0.0488337405072077	-1.50066150991871	-0.102630531405188	9
ENSG00000052841	TTC17	-0.240096554007338	0.582392993712959	0.622591081434774	0.690170503951496	-1.65505802509189	5
ENSG00000052850	ALX4	-0.796168130181972	-0.376149017675424	-0.0922352645745123	-0.466944990600126	1.73149740303203	2
ENSG00000053108	FSTL4	0.586438826966413	1.33984937838214	-0.518463482608023	-0.155686341512805	-1.25213838122772	9
ENSG00000053254	FOXN3	1.53509596899228	-0.740748303262341	0.263106279770094	-0.0457968642889835	-1.01165708121105	6
ENSG00000053328	METTL24	-0.309478388460896	0.0516066290855636	1.68775105756664	-0.590885534099962	-0.838993764091345	4
ENSG00000053371	AKR7A2	-0.0542481292777011	1.09434780634605	0.863200578058358	-1.30026800624465	-0.603032248882052	8
ENSG00000053372	MRTO4	0.703554231249554	0.823566404405742	0.656553058729008	-1.16757488428592	-1.01609881009838	8
ENSG00000053438	NNAT	-0.835453634284986	-1.06384070002449	1.07946943252481	0.988250370876341	-0.168425469091684	3
ENSG00000053501	USE1	-1.058395133232	-0.944402139391223	1.08742984625534	0.897258455354993	0.0181089710128875	3
ENSG00000053524	MCF2L2	1.62786516157425	0.310464663019966	-0.647404154362131	-0.670859947464913	-0.620065722767171	6
ENSG00000053702	NRIP2	0.0205834626382499	-1.0038823759873	0.52747096064204	-0.914382246325343	1.37021019903236	2
ENSG00000053747	LAMA3	-0.326140648291568	-0.554167735597047	-0.375752278451685	-0.524466182892732	1.78052684523303	2
ENSG00000053770	AP5M1	1.68386261895592	-0.795878677534413	0.106437196603555	-0.384475848467707	-0.609945289557355	6
ENSG00000053900	ANAPC4	0.911280883396003	0.56014280332966	0.673121070072045	-0.84513903704868	-1.29940571974903	8
ENSG00000053918	KCNQ1	-0.297170727895799	-1.31478202935199	1.05588940286445	0.953876376678722	-0.397813022295382	3
ENSG00000054116	TRAPPC3	0.604449454631703	-1.07058504192798	1.38618070253561	-0.728117762421514	-0.191927352817815	7
ENSG00000054118	THRAP3	1.18205402497808	0.511578189662863	0.393489065663807	-1.10745419908818	-0.979667081216568	8
ENSG00000054148	PHPT1	-0.74067838750552	1.10826472364049	-0.582823013937862	-0.856824181237746	1.07206085904064	2
ENSG00000054179	ENTPD2	1.78705359276803	-0.369065325249783	-0.472662755839417	-0.472662755839417	-0.472662755839417	6
ENSG00000054267	ARID4B	0.467644291489144	0.0468688744624937	0.966114513010937	0.194995123145185	-1.67562280210776	7
ENSG00000054277	OPN3	-0.949189208808256	-0.88561302935204	-0.258902456900731	1.21403376227858	0.879670932782445	10
ENSG00000054282	SDCCAG8	-1.74237420619796	0.183867479127204	0.723261387446963	0.246741932977574	0.588503406646223	10
ENSG00000054356	PTPRN	1.04551725222216	-0.803831968133727	-0.710309813682616	-0.672992352194788	1.14161688178897	2
ENSG00000054392	HHAT	-1.44871681428891	0.265687155447914	0.195039209940701	-0.313633115336535	1.30162356423683	2
ENSG00000054523	KIF1B	-0.256296208462201	-0.954761966501619	-0.682802890631744	1.56465506100814	0.329206004587424	10
ENSG00000054598	FOXC1	-1.35126858272249	0.069116829344233	1.12495353495605	-0.58901604396507	0.746214262387272	4
ENSG00000054611	TBC1D22A	-0.677371629276626	1.12472186257504	-0.331781962761401	-1.09687294867803	0.981304678141012	2
ENSG00000054654	SYNE2	0.782219139319967	0.376594612608432	0.900896089043576	-0.633942279816718	-1.42576756115526	8
ENSG00000054690	PLEKHH1	1.26583601048216	0.863591278412105	-0.406153118296042	-0.893824112111469	-0.829450058486759	9
ENSG00000054793	ATP9A	-0.840452918762767	-1.31693958522212	0.6469497479817	0.76003719689933	0.750405559103854	10
ENSG00000054938	CHRDL2	-0.636171611991568	-0.680630615895344	0.481402347535144	1.54715399956559	-0.711754119213818	3
ENSG00000054965	FAM168A	-1.00072555538453	0.956172293776815	1.18664164864642	-0.680546620906318	-0.461541766132391	4
ENSG00000054967	RELT	0.680430998660064	0.849509487173328	0.611601842842094	-1.34297393833419	-0.798568390341297	8
ENSG00000054983	GALC	-1.61607777128213	-0.125574283761752	0.999877866123932	0.591854869923979	0.14991931899598	4
ENSG00000055044	NOP58	0.905576709273871	0.781938863312851	0.456262327623463	-0.895203801693369	-1.24857409851681	8
ENSG00000055070	SZRD1	-0.252708726101214	-0.297124590206495	1.61780451319899	-1.10856483407168	0.0405936371803845	4
ENSG00000055118	KCNH2	-1.00867921601366	-0.405867110563166	0.778014574246012	1.32074907157152	-0.684217319240705	3
ENSG00000055130	CUL1	1.26989954714957	0.143110437744724	0.539624528177492	-0.685379857317856	-1.26725465575393	8
ENSG00000055147	FAM114A2	-1.64056084146195	-0.257098668150624	0.615207802202563	0.785514747051806	0.496936960358211	10
ENSG00000055163	CYFIP2	1.48664225783978	-1.33023790442638	0.0075845113399136	-0.140553019016661	-0.0234358457366551	6
ENSG00000055208	TAB2	0.32015199543445	-0.86030061626808	0.727492541607167	1.04882339606958	-1.23616731684312	7
ENSG00000055211	GINM1	-0.360480600135285	-1.12591964713988	0.355179127204486	-0.392610672630112	1.52383179270079	2
ENSG00000055332	EIF2AK2	1.2797604264663	-0.571529772119521	0.879804235668171	-0.776928393252908	-0.811106496762046	7
ENSG00000055483	USP36	0.743545928614388	1.07124921064708	-0.129850934257933	-0.185515167606566	-1.49942903739697	8
ENSG00000055609	KMT2C	-0.094877501043964	-0.353431624394314	1.02015866859872	0.867733472344323	-1.43958301550477	7
ENSG00000055732	MCOLN3	-0.100195263538828	1.73076115212738	-0.694676947354327	-0.275712023949936	-0.66017691728429	1
ENSG00000055813	CCDC85A	-0.857671898541482	1.5782989014447	-0.162676892628316	0.26474066009323	-0.82269077036813	1
ENSG00000055917	PUM2	0.657525680840325	0.249031580860382	0.641153247690431	0.200018929505288	-1.74772943889643	7
ENSG00000055950	MRPL43	1.40753937950923	0.301516787382141	-0.131054908609057	-1.36593266474705	-0.212068593535263	9
ENSG00000055955	ITIH4	-0.970533284912097	-0.698085504652221	0.0460686961592421	1.60256672601617	0.0199833673889095	3
ENSG00000056050	C4orf27	0.912672976075018	0.952107556452643	0.216808724989049	-1.19410199640957	-0.887487261107137	9
ENSG00000056097	ZFR	0.703415296146758	-0.814193193253653	-4.39739225207032e-05	1.24624165810361	-1.13541978707421	7
ENSG00000056277	ZNF280C	0.112922534161376	1.23248079648192	0.575272260115036	-0.577712618569932	-1.34296297218839	8
ENSG00000056291	NPFFR2	1.65096562369637	0.253557507322292	-0.647435008221488	-0.647435008221488	-0.609653114575687	6
ENSG00000056487	PHF21B	1.25456094350342	0.0691299198614123	0.182148993659384	0.0390216096784513	-1.54486146670267	7
ENSG00000056558	TRAF1	0.519223621139916	0.179543121036494	0.302335125197003	0.74557548377295	-1.74667735114636	7
ENSG00000056586	RC3H2	-0.906304526521092	-1.17245303524726	0.211222370339761	1.02182226624004	0.845712925188552	10
ENSG00000056661	PCGF2	0.975073027762745	0.814399098518348	0.315058188574496	-0.862263692168745	-1.24226662268684	8
ENSG00000056736	IL17RB	1.60567763074124	0.267172617518766	-0.277619348291939	-0.819579328658496	-0.775651571309573	6
ENSG00000056972	TRAF3IP2	0.78984640737144	0.498413692890834	-1.15716004354717	-1.00897820916516	0.877878152450057	2
ENSG00000056998	GYG2	1.11655257216781	0.281335279132035	-1.28713146664839	-0.766475904842849	0.655719520191395	9
ENSG00000057019	DCBLD2	0.18286950086448	0.114805499735332	-0.510316821297992	-1.24836483048335	1.46100665118153	2
ENSG00000057252	SOAT1	0.281258496710788	0.90863198662366	0.459418252699412	-1.69761106414227	0.0483023281084121	9
ENSG00000057294	PKP2	0.940472911361709	1.22008370427106	-0.907483003552945	-0.530922170172348	-0.722151441907477	9
ENSG00000057468	MSH4	-0.557558959664169	-1.07233200548966	0.985922727576389	-0.502588772544963	1.1465570101224	2
ENSG00000057593	F7	0.594167414709409	-0.127776320455382	0.039093824924595	1.0703887633668	-1.57587368254542	7
ENSG00000057608	GDI2	0.656599397601623	0.996499150373478	0.50198332539908	-1.04846796880959	-1.1066139045646	8
ENSG00000057657	PRDM1	0.613714045317648	0.963361933603678	-1.06047381718514	-1.10601720132728	0.589415039591096	9
ENSG00000057663	ATG5	1.11981860799656	1.02414423530762	-0.383753888254495	-0.861395642689351	-0.898813312360339	9
ENSG00000057704	TMCC3	-1.06200506513687	-1.10723367671499	0.589969959522106	0.949430089186847	0.62983869314291	10
ENSG00000057757	PITHD1	1.26465563742622	0.772558022922498	-0.154185602998745	-1.00122034068831	-0.881807716661663	9
ENSG00000057935	MTA3	1.58096210626985	0.257967014055159	-0.20571177904142	-0.646322058973179	-0.986895282310411	6
ENSG00000058056	USP13	-0.395082353912337	-0.901591769434538	-0.255859805260758	1.71445595785149	-0.161922029243857	3
ENSG00000058063	ATP11B	-1.17732833359669	-0.516427339573721	1.27922403749624	0.766223965311338	-0.351692329637171	4
ENSG00000058085	LAMC2	0.366737332377706	-0.742485516578497	-0.497620998897256	-0.72202276218087	1.59539194527892	2
ENSG00000058091	CDK14	-0.58709613553097	-0.870685992881541	1.28115310159107	0.875801609549486	-0.699172582728043	4
ENSG00000058262	SEC61A1	-0.392381861937279	-0.831520888220483	-0.149731713033726	-0.359307541496345	1.73294200468783	2
ENSG00000058272	PPP1R12A	1.17871981685174	-1.33491098126185	0.709976185851953	-0.569490490895053	0.0157054694532157	6
ENSG00000058404	CAMK2B	-1.01651282230509	-0.824991849081704	0.128817443826886	0.222763536962284	1.48992369059763	10
ENSG00000058453	CROCC	1.03478283985675	0.809122891392547	0.232337187494401	-0.857605915092279	-1.21863700365141	8
ENSG00000058600	POLR3E	1.11362075247264	0.504331248760136	-0.0549107866038439	0.0187714323143556	-1.58181264694329	8
ENSG00000058668	ATP2B4	-0.655964387200547	-0.129508942471113	1.327348981096	0.635778289763006	-1.17765394118734	5
ENSG00000058673	ZC3H11A	-0.917966474792658	-0.226793682824754	1.02549462101976	1.07135180655428	-0.952086269956635	3
ENSG00000058729	RIOK2	0.558114152308901	1.41679351468649	-0.78417169880253	-0.172666314145953	-1.01806965404692	1
ENSG00000058799	YIPF1	1.36362807196739	-1.3706678605265	0.154513957797207	-0.410663796985264	0.263189627747163	6
ENSG00000058804	NDC1	1.01097144766145	0.802000646757051	0.287925330858249	-0.900539235457121	-1.20035818981963	8
ENSG00000058866	DGKG	-0.623199082226759	0.925787477720015	-0.839532655183774	-0.707635139331987	1.2445793990225	2
ENSG00000059122	FLYWCH1	-0.782548415587992	-1.32214621561935	0.507303121543355	1.02930482564581	0.568086684018178	10
ENSG00000059145	UNKL	1.74359089253345	-0.463314268633755	-0.267384372587585	-0.22293163848945	-0.789960612822656	6
ENSG00000059377	TBXAS1	-0.16249693616635	1.17057831360252	0.603841063071458	-1.49136991253263	-0.120552527974997	1
ENSG00000059378	PARP12	1.31832468044508	-1.025131719747	-0.202454601111242	-0.808920227083832	0.718181867496994	6
ENSG00000059573	ALDH18A1	0.837676809454453	0.770269071463969	0.500216936160951	-1.39510259964661	-0.713060217432764	8
ENSG00000059588	TARBP1	0.999161067799779	0.50793036915509	0.148763692022735	-0.00615351995519809	-1.6497016090224	8
ENSG00000059691	PET112	0.179034195668029	1.30036781390652	0.455441285286899	-0.652974312286534	-1.28186898257491	8
ENSG00000059728	MXD1	-1.14466819887063	-0.825632640900808	0.909978204830171	1.08597741944281	-0.0256547845015498	3
ENSG00000059758	CDK17	-0.401473039713623	-1.47870387475787	0.338528048130707	0.352905543765358	1.18874332257543	10
ENSG00000059769	DNAJC25	0.304417150681095	-1.18746128527026	1.3354189688983	0.326804705982819	-0.779179540291962	7
ENSG00000059804	SLC2A3	1.4831575326892	0.279193712752339	-0.219729781994026	-1.26333356511019	-0.27928789833733	9
ENSG00000059915	PSD	1.38348269931447	0.273895370824918	0.227977886643732	-0.641265065719535	-1.24409089106359	8
ENSG00000060069	CTDP1	1.47980215511169	-0.755181547297225	0.278220950208319	0.072876147658509	-1.07571770568129	7
ENSG00000060138	YBX3	-0.454036674761163	-1.00254132085688	1.65980343553844	-0.182741825729133	-0.0204836141912648	4
ENSG00000060140	STYK1	0.826996049343815	-0.709778598948248	-0.683617073146681	-0.761921068193129	1.32832069094424	2
ENSG00000060237	WNK1	1.38715559834243	-0.480727625019983	0.699631190481006	-0.622055170702946	-0.984003993100509	7
ENSG00000060339	CCAR1	1.246624417587	0.157327125433485	0.545869426171904	-0.641517772694532	-1.30830319649786	8
ENSG00000060491	OGFR	0.105579563704169	1.10724052572368	0.818639999221342	-1.13673599399398	-0.894724094655212	8
ENSG00000060642	PIGV	0.744980664961511	1.32792355899947	-0.543557545960441	-0.435494516958594	-1.09385216104195	9
ENSG00000060656	PTPRU	1.06346387561279	0.543018442223799	-0.228082527065363	-1.575811683577	0.197411892805766	9
ENSG00000060688	SNRNP40	1.02470920715192	0.865187990756424	0.0840069194242081	-0.636085355553402	-1.33781876177915	8
ENSG00000060709	RIMBP2	-0.776434652838154	1.63502319389082	-0.0480191424670374	0.0380160859005902	-0.848585484486214	1
ENSG00000060718	COL11A1	-0.281175464562342	0.907588869754505	-0.506359594836578	-1.25032441077301	1.13027060041742	2
ENSG00000060749	QSER1	1.32839624957416	0.0439529499976976	0.366788450276472	-0.327998011231437	-1.41113963861689	8
ENSG00000060762	MPC1	-1.17571002550726	-0.701040093816627	-0.135965783419903	1.2091501799501	0.803565722793688	10
ENSG00000060971	ACAA1	-0.0168373485340443	-1.36286379895189	0.566316818604272	-0.456675369385752	1.27005969826741	2
ENSG00000060982	BCAT1	0.520349082483805	0.613399815269001	-1.32301203907574	0.984773799497725	-0.795510658174794	1
ENSG00000061273	HDAC7	0.431189727728446	-0.674406801725398	1.46214607867116	-0.120339891477813	-1.0985891131964	7
ENSG00000061337	LZTS1	-0.834265393168595	-1.28374245440086	0.50211828120094	1.02968139593079	0.586208170437718	10
ENSG00000061455	PRDM6	-0.478435925598081	1.77469360650987	-0.231760941452576	-0.50703051923158	-0.557466220227631	1
ENSG00000061492	WNT8A	-0.121900704958177	1.75840950683932	-0.544089641478299	-0.531841639914289	-0.560577520488555	1
ENSG00000061656	SPAG4	0.415253218912353	1.57004770160007	-0.61087920606072	-0.83691731985812	-0.537504394593578	1
ENSG00000061676	NCKAP1	1.62921140706727	-0.189663784922695	0.0366374634396481	-1.06884496726754	-0.407340118316685	6
ENSG00000061794	MRPS35	0.295415195180848	1.03092620473009	0.773878284249654	-1.20106026963197	-0.899159414528626	8
ENSG00000061918	GUCY1B3	-1.01211819181093	-0.209025776280691	1.33833030144113	-0.811564174263422	0.694377840913907	4
ENSG00000061936	SFSWAP	-0.221333474710762	0.907374996485087	0.84257348986186	0.0260785062065407	-1.55469351784273	5
ENSG00000061938	TNK2	-0.321997772307358	-1.24156236595381	-0.290730567528407	1.45208299318746	0.402207712602122	10
ENSG00000061987	MON2	-1.0215440114272	0.625030012654347	0.695536837733117	0.859772112101755	-1.15879495106202	5
ENSG00000062038	CDH3	1.71721239543758	-0.0658536183409383	-0.561078574516754	-0.282766071461966	-0.807514131117925	6
ENSG00000062194	GPBP1	0.923530177330526	0.247918017311209	0.415996924593819	0.115283552487203	-1.70272867172276	8
ENSG00000062282	DGAT2	1.48709025681043	-0.544520915019594	0.578712229188582	-0.761842428636226	-0.75943914234319	6
ENSG00000062370	ZNF112	-0.9900293580179	0.403533296704095	1.26206551143741	0.381936176602116	-1.05750562672573	5
ENSG00000062485	CS	-0.260646742636939	1.38790849095648	0.590264850673579	-0.556760076650761	-1.16076652234237	1
ENSG00000062524	LTK	-0.810592552885322	-0.738360770965434	-0.389972251250976	1.58832001481279	0.350605560288939	10
ENSG00000062582	MRPS24	-0.280772592175875	1.49779392257233	0.301130583637142	-1.22528828608192	-0.292863627951671	1
ENSG00000062598	ELMO2	0.235367983305254	-1.76377800308108	0.68299270124279	0.352548780798019	0.492868537735015	10
ENSG00000062650	WAPAL	0.880967141226725	0.594947943530121	0.331690356819432	-0.153403949616099	-1.65420149196018	8
ENSG00000062716	VMP1	0.00439667510275734	-1.1997329655817	-0.126735608891643	-0.252917690394651	1.57498958976524	2
ENSG00000062725	APPBP2	-1.49112503481156	-0.570045641669793	0.766523792188011	0.761297332744469	0.533349551548867	10
ENSG00000062822	POLD1	0.731423860297599	0.852732880779734	0.56067885465346	-0.824078185427102	-1.32075741030369	8
ENSG00000063015	SEZ6	1.78132964712462	-0.581287798865932	-0.444550812535732	-0.432336752091111	-0.323154283631844	6
ENSG00000063046	EIF4B	0.350495109138589	1.3621627112775	0.147225759064259	-0.562241478526901	-1.29764210095345	8
ENSG00000063127	SLC6A16	-1.08899106914776	0.159769210071912	0.677684189913456	1.19760855908923	-0.94607088992684	3
ENSG00000063169	GLTSCR1	1.52465148926897	-0.0285071968208707	0.158521459985672	-0.452808680346501	-1.20185707208727	6
ENSG00000063176	SPHK2	1.31956466076077	-1.21244902837292	0.561711381179601	0.0188088006116321	-0.687635814179087	7
ENSG00000063177	RPL18	-0.424056896699138	0.957796642130445	0.650050876723849	0.351384891143599	-1.53517551329876	5
ENSG00000063180	CA11	1.3812498819947	0.416142422860678	-0.0439468118250243	-1.31247346458772	-0.440972028442629	9
ENSG00000063241	ISOC2	1.46067064994935	-0.301477392082192	-0.585620480251479	-1.08306159937859	0.509488821762912	6
ENSG00000063244	U2AF2	1.1802688496336	0.327764959643612	0.530817887507579	-0.755503678638428	-1.28334801814636	8
ENSG00000063245	EPN1	0.712403860232262	1.31739079167366	-0.173711093393749	-0.881870306018009	-0.974213252494166	9
ENSG00000063322	MED29	1.23816215800247	0.768434967798796	-0.209408016481654	-1.22849310426213	-0.568696005057481	9
ENSG00000063438	AHRR	-0.520579033050247	-0.524788396472315	-0.520405038535361	-0.206293096092578	1.7720655641505	2
ENSG00000063587	ZNF275	-0.86060967964136	-0.736689587351977	0.570255779545247	1.47893321416948	-0.451889726721393	3
ENSG00000063601	MTMR1	-0.520888560428352	-1.44443840221854	0.638971602010804	1.08411641118689	0.2422389494492	10
ENSG00000063660	GPC1	-1.11611490475121	-1.02378096354835	0.418015897784122	0.704435271531875	1.01744469898356	10
ENSG00000063761	ADCK1	1.45763800377137	0.0140056410978637	0.230605772321799	-0.419216309402407	-1.28303310778863	8
ENSG00000063854	HAGH	-0.373003573301531	-1.41501151691094	-0.128797302588379	0.908721583278282	1.00809080952257	10
ENSG00000063978	RNF4	1.50433387338239	-0.382014853790345	0.500924966037402	-0.705184431688035	-0.918059553941418	6
ENSG00000064012	CASP8	0.317537483641834	-0.688206469040506	-0.303162055852034	-0.909401139431046	1.58323218068175	2
ENSG00000064042	LIMCH1	-0.232612842261559	-1.60945380943523	0.22722789902607	0.801714805796025	0.813123946874691	10
ENSG00000064102	ASUN	1.16022096006639	0.722313090603783	0.00172750028796329	-1.36458038341959	-0.519681167538541	9
ENSG00000064115	TM7SF3	1.37839341294256	-0.106412812814461	-0.474386894737932	-1.27788363085961	0.48028992546944	6
ENSG00000064195	DLX3	1.44987675267937	0.569226069709874	-0.988151081020608	-0.333863951795635	-0.697087789573003	9
ENSG00000064199	SPA17	0.00856208505177454	1.58019265588401	0.0924213578286126	-1.04208198983524	-0.639094108929151	1
ENSG00000064218	DMRT3	-0.587675493882336	-0.650154190011138	1.68261192527611	0.166092167813517	-0.610874409196151	4
ENSG00000064225	ST3GAL6	0.179153654263291	1.66814807115254	-0.438442309103928	-0.688431348920711	-0.720428067391189	1
ENSG00000064270	ATP2C2	1.51162604409925	-0.894449439727616	-0.0568974537223105	0.33417028907829	-0.894449439727616	6
ENSG00000064300	NGFR	-0.27851281302766	-1.32886859619535	1.42456309548241	0.326406588872554	-0.143588275131956	4
ENSG00000064309	CDON	-0.495210226676359	-1.03808828125427	1.44198240376585	0.590477739459526	-0.499161635294753	4
ENSG00000064313	TAF2	0.785085732607324	0.768041683664798	0.624550091609763	-0.961265473994328	-1.21641203388756	8
ENSG00000064393	HIPK2	-0.178616995605651	0.427555791317514	0.790240434233757	-1.66433092512077	0.625151695175146	2
ENSG00000064419	TNPO3	1.40131885234692	0.61922811382451	-0.247832628982402	-0.785900848533584	-0.98681348865544	9
ENSG00000064490	RFXANK	-0.869464811978218	0.385535020850504	0.669363504558517	1.05405107014606	-1.23948478357686	5
ENSG00000064545	TMEM161A	0.48104594546133	1.21370951402185	0.318774822147193	-0.718031241548191	-1.29549904008218	8
ENSG00000064547	LPAR2	0.634187612488726	0.803535577470655	0.600916878706436	-0.512857356534445	-1.52578271213137	8
ENSG00000064601	CTSA	0.15301303237581	-0.410373859234696	-0.274398626927891	-1.07417654856191	1.60593600234869	2
ENSG00000064607	SUGP2	0.567816176645429	0.88058241316458	0.542314542132162	-0.435631207552564	-1.55508192438961	8
ENSG00000064651	SLC12A2	-1.432704744087	-0.270893121776685	0.659238010960899	-0.14641394198008	1.19077379688287	10
ENSG00000064652	SNX24	1.7299979959659	-0.574390462060099	-0.0246186243946529	-0.701524777960845	-0.429464131550304	6
ENSG00000064655	EYA2	-0.444194350943345	-0.806656359152963	1.41325169935994	0.674289244023657	-0.836690233287292	4
ENSG00000064666	CNN2	1.45279648174647	-0.588698479334239	0.354908548237813	-1.18996340323153	-0.0290431474185098	6
ENSG00000064687	ABCA7	0.840064944196836	-1.03945394433554	0.546789925869907	0.789238648009171	-1.13663957374038	7
ENSG00000064692	SNCAIP	0.505179805986223	-0.164324018270175	1.45190980283039	-0.85933772971382	-0.933427860832623	8
ENSG00000064703	DDX20	0.756642643097662	0.142682620215778	1.00843640477578	-0.419833875930361	-1.48792779215886	8
ENSG00000064726	BTBD1	-0.703158186434411	-0.819890895179076	-0.371642369100119	0.276412946444207	1.6182785042694	10
ENSG00000064763	FAR2	1.55528645121047	0.126616762230783	-0.740854925484569	-1.00596802033491	0.0649197323782317	6
ENSG00000064787	BCAS1	-0.446952059626401	-0.44615379799821	-0.442865742752029	-0.452871130984816	1.78884273136146	2
ENSG00000064932	SBNO2	1.69258881177907	0.0333958235004307	-0.718886931713256	-0.268914540182319	-0.738183163383921	6
ENSG00000064933	PMS1	1.0850543213682	0.624656106265227	0.322954090144579	-0.654185877347081	-1.37847864043092	8
ENSG00000064961	HMG20B	0.918425007452883	0.769483864107166	0.386087907786059	-1.40072555091912	-0.673271228426986	9
ENSG00000064989	CALCRL	-0.808466700285995	-0.696299419394414	0.226861556342639	1.63734161224933	-0.359437048911556	3
ENSG00000064995	TAF11	0.0353740867585387	0.049891625003601	1.21760847467627	0.26096318332976	-1.56383736976817	5
ENSG00000064999	ANKS1A	-0.467193588345567	-1.08958403905463	-0.16495055250259	1.59746239477553	0.124265785127257	3
ENSG00000065000	AP3D1	1.27893286596036	0.604767203275065	0.0475391293850116	-1.22202256754825	-0.709216631072183	9
ENSG00000065029	ZNF76	1.04936814532797	-0.773904014695774	0.71566003987313	0.309598215016036	-1.30072238552136	7
ENSG00000065054	SLC9A3R2	-0.454857374282903	-1.06408485343902	1.53470280318872	-0.398643196513963	0.382882621047168	4
ENSG00000065057	NTHL1	0.939788967487972	0.694324860553622	0.531744947112806	-1.13987180967365	-1.02598696548075	8
ENSG00000065060	UHRF1BP1	0.356933619885333	1.15429467311877	-0.0966396593746196	0.167443493515958	-1.58203212714544	8
ENSG00000065135	GNAI3	0.552272848254827	0.882356647795213	0.707045792228882	-0.82270343181553	-1.31897185646339	8
ENSG00000065150	IPO5	0.894393135066107	1.00608548187086	0.175741189285826	-1.00961766181846	-1.06660214440434	8
ENSG00000065154	OAT	1.00076088733602	0.221699070584537	-0.305026331033089	-1.56222120310082	0.64478757621335	9
ENSG00000065183	WDR3	0.7334936509105	0.935307725835582	0.46877118784419	-0.865277239413885	-1.27229532517639	8
ENSG00000065243	PKN2	0.664684299156266	0.659227574382727	0.604351345787993	-0.293581940746934	-1.63468127858005	8
ENSG00000065268	WDR18	0.429115930321453	1.11665823790093	0.544226977661592	-0.834407956785233	-1.25559318909875	8
ENSG00000065308	TRAM2	-0.73315735061568	-0.760791621042042	0.102158806285393	-0.27998914576391	1.67177931113624	2
ENSG00000065320	NTN1	-0.0590342248832788	-0.719384986942008	1.70919954330582	-0.215929638519455	-0.714850692961073	4
ENSG00000065328	MCM10	0.947163812727129	0.644310628519534	0.578093084672984	-1.08024027709009	-1.08932724882956	8
ENSG00000065357	DGKA	0.690253689312436	0.310471036281223	-0.610753620227739	-1.41525168428901	1.02528057892309	2
ENSG00000065361	ERBB3	-0.233731538333304	-1.46052050477659	0.581162403417931	1.21038555388378	-0.0972959141918187	3
ENSG00000065413	ANKRD44	-0.970302528101859	-0.873184362512428	-0.142879079013397	1.38229913659614	0.604066833031544	10
ENSG00000065427	KARS	0.452184861637814	1.47742476486909	-0.147361151641511	-0.853542373695214	-0.928706101170184	9
ENSG00000065457	ADAT1	0.560527916850825	1.18758827353613	0.279187066184101	-0.746707924469495	-1.28059533210156	8
ENSG00000065485	PDIA5	0.823268517908905	-0.141778395517186	-0.435574079734472	-1.3643616029712	1.11844556031395	2
ENSG00000065491	TBC1D22B	1.43510102898334	0.379707119817024	0.00997922219733059	-0.656187245084834	-1.16860012591286	8
ENSG00000065518	NDUFB4	1.02948421391162	0.951960815977396	-0.736478883938256	-1.22104859126963	-0.0239175546811242	9
ENSG00000065526	SPEN	0.902357069921499	0.454585105993694	0.699122923033513	-0.594080136931808	-1.4619849620169	8
ENSG00000065534	MYLK	0.312283341252907	0.337570399142325	-0.835544058447428	-1.14674167126915	1.33243198932135	2
ENSG00000065548	ZC3H15	0.862642010297943	1.11258099381599	-0.147725561503441	-0.509820509011834	-1.31767693359865	8
ENSG00000065559	MAP2K4	0.907738969953833	-0.761207362061772	0.555014925232605	0.659783010462739	-1.3613295435874	7
ENSG00000065600	TMEM206	-0.0273805861016925	0.229109544431699	1.34391346727696	-0.0850165680428624	-1.4606258575641	5
ENSG00000065609	SNAP91	-0.916106486596316	-0.636114688519138	0.278370703682149	1.60317293889955	-0.32932246746624	3
ENSG00000065613	SLK	-0.837232474286658	1.21741062567194	0.778636962952024	-0.0601526112040295	-1.09866250313328	5
ENSG00000065615	CYB5R4	-0.201870162376488	0.689584887249953	-0.0304341717076179	-1.52830218066783	1.07102162750198	2
ENSG00000065618	COL17A1	1.5356993591414	0.491898100639171	-0.791082068050384	-0.686696506260157	-0.549818885470027	9
ENSG00000065621	GSTO2	1.75497101568903	-0.163580119502103	-0.477340823381574	-0.407174720137283	-0.706875352668072	6
ENSG00000065665	SEC61A2	0.633530165648998	-0.944883274747172	0.693600160212267	0.846107774594137	-1.22835482570823	7
ENSG00000065675	PRKCQ	1.53610686891967	-0.232366027366227	-0.166286473819	0.106487339773082	-1.24394170750753	6
ENSG00000065717	TLE2	0.201583157053411	-1.28440311503853	1.3280087411606	0.385345999883159	-0.630534783058642	7
ENSG00000065802	ASB1	-0.750418006635528	-0.746081333294924	-0.575895921519516	0.588331419026069	1.4840638424239	10
ENSG00000065809	FAM107B	0.304951109581949	0.666211309079772	0.980091929650065	-1.52284301637491	-0.428411331936878	8
ENSG00000065833	ME1	0.137869247524185	0.350296679629431	-0.912347521948038	-0.999507587659037	1.42368918245346	2
ENSG00000065882	TBC1D1	0.248866470676448	-0.150710633680938	-1.30352976611045	1.46573353891994	-0.260359609804996	3
ENSG00000065883	CDK13	0.00515374989417506	-0.171037020223218	0.754643461049476	0.976035927480702	-1.56479611820114	5
ENSG00000065911	MTHFD2	0.730233068218559	1.3489009485688	-0.326149837748056	-0.923265021789111	-0.829719157250193	9
ENSG00000065923	SLC9A7	0.414130238400206	-1.3045973645092	-0.464561546016217	-0.0269901284301797	1.38201880055539	2
ENSG00000065970	FOXJ2	-0.675098445219089	-0.0485249396475354	1.61391213044606	0.0748883326439573	-0.965177078223393	4
ENSG00000065978	YBX1	1.3908950586949	0.49302700625868	0.00178404312704162	-1.09183016799001	-0.793875940090609	9
ENSG00000065989	PDE4A	1.01515688470197	0.582598379381771	0.469333339027301	-0.663859166538148	-1.40322943657289	8
ENSG00000066027	PPP2R5A	1.53999838571231	0.410794771921454	-0.29343836685363	-0.820488959556185	-0.836865831223951	9
ENSG00000066032	CTNNA2	1.70266784788524	0.0370879795539012	-0.336406957513435	-0.672665685195444	-0.730683184730261	6
ENSG00000066044	ELAVL1	0.278653507314302	0.591067881913166	0.641185923673017	0.24964612442418	-1.76055343732466	5
ENSG00000066056	TIE1	1.56843968291771	0.400303545127832	-0.797625242257925	-0.755543311880048	-0.415574673907573	9
ENSG00000066084	DIP2B	-0.330337406258174	-0.334105227954911	1.65388615666268	-1.02122543330157	0.0317819108519772	4
ENSG00000066117	SMARCD1	0.942957702506971	0.925192602447911	0.16526401211434	-0.733731599936993	-1.29968271713223	8
ENSG00000066135	KDM4A	1.37944605259848	-0.497796408771706	0.709791292819542	-0.596746202895208	-0.994694733751107	7
ENSG00000066136	NFYC	-0.577616424066661	-0.552022943726849	0.986942141148112	1.16162240852907	-1.01892518188368	3
ENSG00000066185	ZMYND12	0.455469153215572	0.534412836916789	-0.797349568500121	1.09802229476587	-1.29055471639811	5
ENSG00000066248	NGEF	0.483954270359901	1.40227701284356	-1.21814688127267	-0.548934307666663	-0.119150094264119	9
ENSG00000066279	ASPM	0.852820104943175	0.743988149814522	0.582969611320357	-1.04740269352921	-1.13237517254885	8
ENSG00000066322	ELOVL1	-0.476763176579233	0.237131852551593	0.235142016591876	-1.35074527844274	1.3552345858785	2
ENSG00000066379	ZNRD1	0.101902221296904	1.14483507696618	0.654578330337557	-0.480022481205497	-1.42129314739515	8
ENSG00000066382	MPPED2	-0.505573570140992	-0.670562794093457	1.57000934389219	0.416351208723552	-0.810224188381291	4
ENSG00000066422	ZBTB11	0.00324597207130066	0.197650350713857	1.16823619975467	0.226171366143342	-1.59530388868317	5
ENSG00000066427	ATXN3	1.03007080027499	0.164717428625577	0.169860517897318	0.305561404036623	-1.67021015083451	7
ENSG00000066455	GOLGA5	-0.512062524175294	-1.4065978303923	0.0917953000370317	0.710787302760089	1.11607775177048	10
ENSG00000066468	FGFR2	1.55270480723376	0.346690201278368	-0.338204490659398	-0.519948475029145	-1.04124204282358	6
ENSG00000066557	LRRC40	0.82973111020897	1.00049058557282	0.190956553981855	-0.670354126120599	-1.35082412364305	8
ENSG00000066583	ISOC1	1.10210768328108	0.926630827875383	-0.0705940702908762	-0.931293486265921	-1.02685095459966	9
ENSG00000066629	EML1	0.987812241189002	-0.983222165741206	1.03611674917462	-0.990687274383836	-0.0500195502385818	6
ENSG00000066651	TRMT11	0.458831172065925	1.12948102018	0.188680713556657	-0.217939119301419	-1.55905378650117	8
ENSG00000066654	THUMPD1	0.936869200665559	0.0242608536856303	0.699069688900408	-0.037995873360079	-1.62220386989152	7
ENSG00000066697	MSANTD3	1.47929350912045	-0.585906436780501	0.379296473566144	-1.14362711787419	-0.129056428031906	6
ENSG00000066735	KIF26A	0.754805515281316	0.896906262402221	-0.176193656796324	0.13005622040136	-1.60557434128857	8
ENSG00000066739	ATG2B	-0.657064626715664	-1.03321872047847	0.91372008791901	1.21421004816943	-0.437646788894303	3
ENSG00000066777	ARFGEF1	1.55627587309546	-0.0817648119876818	-0.647746139753912	0.22300372049958	-1.04976864185345	6
ENSG00000066827	ZFAT	-0.154185673253756	-1.40699785571676	0.808729031966436	1.10404840785217	-0.351593910848093	3
ENSG00000066855	MTFR1	0.68401988344985	1.19181522356259	0.144857427869329	-0.853645218852591	-1.16704731602918	8
ENSG00000066923	STAG3	1.54512529561055	0.140679363596493	-0.10624576951469	-0.381119542861874	-1.19843934683048	6
ENSG00000066926	FECH	0.584356250581575	0.0286718016991481	0.202707957141459	-1.68925447369129	0.873518464269108	2
ENSG00000066933	MYO9A	-1.40350464583226	0.0836578770162349	1.01985703811432	0.834856446725458	-0.534866716023745	4
ENSG00000067057	PFKP	1.29845805130467	-0.635143735626225	-0.127114188844195	-1.20369768501596	0.667497558181713	6
ENSG00000067064	IDI1	-1.4397057321695	-0.120145580303111	1.30401357385892	-0.171776450338048	0.427614188951734	4
ENSG00000067066	SP100	-0.432188631716148	-0.45719436247775	-0.455343155887596	-0.444038443805342	1.78876459388684	2
ENSG00000067082	KLF6	-1.43558183964629	-0.408738505666061	1.25899911942956	0.204177947393949	0.38114327848885	4
ENSG00000067113	PPAP2A	1.24573594192643	-0.786013247253303	-0.924760176958909	-0.425893676449824	0.890931158735602	6
ENSG00000067141	NEO1	0.966117236917225	-0.105482601271776	0.833095575946218	-0.16602677995407	-1.5277034316376	7
ENSG00000067167	TRAM1	0.308391944440977	-0.779283709799076	0.0210055055657696	-1.03917143247678	1.48905769226911	2
ENSG00000067177	PHKA1	-0.333478717302199	1.49907108173621	0.483502764635988	-0.979540372814708	-0.669554756255294	1
ENSG00000067182	TNFRSF1A	0.502808047025103	-0.605059682283675	-0.170918569082001	-1.15076929953788	1.42393950387846	2
ENSG00000067191	CACNB1	-0.993193872158638	-0.741231360259191	-0.408089276573896	1.10604902507607	1.03646548391565	10
ENSG00000067208	EVI5	-0.87352407575093	-1.24122010618391	1.06012896199544	0.436896631756729	0.617718588182668	10
ENSG00000067221	STOML1	-1.07420748168371	-0.813533937578996	-0.063504616227424	0.603784721632514	1.34746131385762	10
ENSG00000067225	PKM	-0.621627725420092	0.213020133401953	-0.159666484739092	-1.01610145786897	1.5843755346262	2
ENSG00000067248	DHX29	1.23338425363625	-1.50663716330518	-0.229400484799571	0.373500632912564	0.129152761555936	6
ENSG00000067334	DNTTIP2	1.43385868071466	0.358298993602094	0.0365430942889115	-0.647645991169479	-1.18105477743618	8
ENSG00000067365	METTL22	0.709613475116971	1.27859742715391	-1.07148576301621	-0.0753722927333799	-0.841352846521301	9
ENSG00000067369	TP53BP1	0.450530174954975	-1.37591365644568	-0.316744293722856	1.33943583822736	-0.0973080630137936	3
ENSG00000067445	TRO	-1.14541046008251	-0.540050788888151	0.848871690847583	1.2324986329741	-0.395909074851031	3
ENSG00000067533	RRP15	1.33128361883003	-0.000823789939865367	0.153755827169456	0.000386056244723532	-1.48460171230434	7
ENSG00000067560	RHOA	0.525049211644731	0.90336655162924	-0.580150951752752	-1.47577409300408	0.627509281482846	9
ENSG00000067596	DHX8	1.07064825295416	-0.877215898536107	1.07149159753844	-0.371603738529655	-0.893320213426846	7
ENSG00000067601	PMS2P4	-0.996465561880081	0.634114015069185	0.740806191399631	0.806902194299341	-1.18535683888808	5
ENSG00000067606	PRKCZ	1.41748374036323	0.459597433082184	-0.149008528463939	-0.500588272153063	-1.22748437282841	9
ENSG00000067704	IARS2	0.67412868774959	1.26248269033888	0.0235536072076311	-1.10257700629009	-0.857587979006009	9
ENSG00000067715	SYT1	1.03718273802842	0.829821089763753	-0.00699940096886192	-0.427114700440761	-1.43288972638255	8
ENSG00000067798	NAV3	-0.999183885675453	-1.05927131409824	0.200079818954952	1.16663703633964	0.6917383444791	10
ENSG00000067829	IDH3G	-0.750136747047762	0.0176855926387513	1.35158306800119	-1.15174857583425	0.532616662242067	4
ENSG00000067836	ROGDI	1.02443842568705	0.997358880722546	-0.781568925748509	-1.15670899613164	-0.0835193845294409	9
ENSG00000067840	PDZD4	1.64554243568511	-0.430254763043489	0.189280769848906	-0.496326134995659	-0.908242307494863	6
ENSG00000067842	ATP2B3	-0.582926536173406	-0.131751095464717	1.15150470799799	0.835499708346225	-1.2723267847061	5
ENSG00000067900	ROCK1	1.11268964599489	0.682221734786285	-0.0245345811034411	-0.281542682471284	-1.48883411720645	8
ENSG00000067955	CBFB	-0.652584053442304	0.148411453452702	1.54914981654155	0.0280812092902503	-1.0730584258422	4
ENSG00000067992	PDK3	1.1994549177326	0.511021025031951	0.312523064654912	-0.73200687916393	-1.29099212825553	8
ENSG00000068001	HYAL2	0.855183342438059	0.788191353425422	0.339605671694409	-1.52345741016364	-0.459522957394251	9
ENSG00000068024	HDAC4	-0.446082415820806	-0.22472006578239	0.860386991999567	1.12837462855829	-1.31795913895466	3
ENSG00000068028	RASSF1	-1.07314653634829	1.29593661921806	-0.279583461591142	0.766341516080385	-0.709548137359019	1
ENSG00000068078	FGFR3	1.53710674054348	0.453058500830835	-0.46110636898566	-0.605766622748736	-0.923292249639924	9
ENSG00000068079	IFI35	0.60734412270771	-0.157464297284048	-1.00110906156032	-0.831677557278624	1.38290679341528	2
ENSG00000068097	HEATR6	1.17285296415857	0.333604991499178	0.420784298748599	-0.474268057092591	-1.45297419731376	8
ENSG00000068120	COASY	1.36426617793104	0.262442976858049	-0.0417605592806894	-0.155243370170701	-1.4297052253377	8
ENSG00000068137	PLEKHH3	1.12875391546422	0.91052850983651	-0.122037258619756	-1.10702208473268	-0.810223081948291	9
ENSG00000068305	MEF2A	-1.04297848604511	-0.884832337263212	-0.123940419067477	1.09319874056912	0.95855250180668	10
ENSG00000068308	OTUD5	1.30782829445775	0.633363952032398	-0.170331405165599	-1.26716881880136	-0.503692022523195	9
ENSG00000068323	TFE3	1.65074930483662	-0.64791382786335	-0.729880438542402	-0.514139221785089	0.241184183354216	6
ENSG00000068354	TBC1D25	-0.847653025136952	1.26103871105149	0.895306186676405	-0.52520387960607	-0.783487992984873	1
ENSG00000068366	ACSL4	-0.0117620580388431	-0.787692086359029	-0.89610609002672	0.0931495943025484	1.60241064012205	2
ENSG00000068383	INPP5A	-0.426474747490233	-0.94369545274413	0.720565914748437	-0.723374865415752	1.37297915090168	2
ENSG00000068394	GPKOW	1.04191265428924	0.292390319353375	0.175614633702988	0.155579452504181	-1.66549705984978	8
ENSG00000068400	GRIPAP1	1.60072006603045	-0.43729662185496	-0.19576242102188	0.12442933477672	-1.09209035793033	6
ENSG00000068438	FTSJ1	0.0286474594055998	-0.570623020423181	0.151187548464359	-1.14145927315319	1.53224728570641	2
ENSG00000068489	PRR11	0.937042493783669	0.814829763318474	0.385904341894935	-0.959258771197706	-1.17851782779937	8
ENSG00000068615	REEP1	-0.88007211685349	-0.986638913547458	-0.20592828013603	0.86068735320032	1.21195195733666	10
ENSG00000068650	ATP11A	0.493973748020563	1.17763537113456	0.39529740946319	-0.837425807088879	-1.22948072152943	8
ENSG00000068654	POLR1A	0.508062632387455	0.350303221025119	1.18006296297435	-0.746253423262608	-1.29217539312432	8
ENSG00000068697	LAPTM4A	-0.3142841726446	-0.985791322441895	1.1374873831322	-0.819357356491626	0.981945468445915	2
ENSG00000068724	TTC7A	0.942811076070619	1.1889645397743	-0.78512718897784	-0.37809980528457	-0.968548621582508	9
ENSG00000068745	IP6K2	0.216645996062155	0.680018174191498	0.941839692791107	-0.243408177009774	-1.59509568603499	8
ENSG00000068784	SRBD1	0.6060458512114	0.848873333761925	0.463679227849402	-0.304847478521751	-1.61375093430098	8
ENSG00000068793	CYFIP1	-0.221016930979278	0.419714870164229	1.43514316873199	-1.25317543717803	-0.380665670738915	4
ENSG00000068796	KIF2A	1.03029898792146	0.253870331851418	-0.0441712838870677	0.405497248084689	-1.64549528397051	7
ENSG00000068831	RASGRP2	1.12044075091732	-0.91253829125794	-0.676109742881319	1.05421124925213	-0.586003966030184	6
ENSG00000068878	PSME4	1.65573258845777	-0.581248732248908	0.102608316569654	-0.918241437084771	-0.258850735693745	6
ENSG00000068885	IFT80	0.763569166679758	0.57430494257905	0.793091053087688	-1.37178005142913	-0.759185110917366	8
ENSG00000068903	SIRT2	-1.20607692548778	-0.880112286397381	0.241509221925734	0.996609693325581	0.84807029663385	10
ENSG00000068912	ERLEC1	-0.12212600628597	-1.06328741187633	-0.494868198715633	0.0662101176710644	1.61407149920687	2
ENSG00000068971	PPP2R5B	-0.892352988737558	-1.1892745758009	0.339635169358208	0.59107538187001	1.15091701331024	10
ENSG00000068976	PYGM	-0.265268825312187	-0.826859896231967	-1.0008292120266	0.882101968962399	1.21085596460835	10
ENSG00000069011	PITX1	-1.45287846258582	0.548947772950575	1.2347748440595	-0.230239793719143	-0.100604360705115	4
ENSG00000069020	MAST4	-0.901049101399811	-1.01326651561655	1.42595462832991	0.177822919395037	0.310538069291414	4
ENSG00000069188	SDK2	0.512111744014819	0.644732008600873	-0.365323093357642	0.803270270308074	-1.59479092956612	5
ENSG00000069248	NUP133	0.825534939798616	0.750901741862706	0.380770083759403	-0.389398995740615	-1.56780776968011	8
ENSG00000069275	NUCKS1	1.02946834169455	0.309894346364434	0.732264806880225	-0.75109595627043	-1.32053153866877	8
ENSG00000069329	VPS35	-0.540523700039136	0.688753662162768	1.27344531785787	-1.25911186158246	-0.162563418399038	4
ENSG00000069345	DNAJA2	1.17203170554525	0.865966323280392	-0.112314820344064	-0.893194351753567	-1.03248885672802	9
ENSG00000069399	BCL3	-1.09295742266185	-0.495931676554366	0.643922265763824	-0.449031315095652	1.39399814854805	2
ENSG00000069424	KCNAB2	0.627955144027069	1.06272661088018	0.424350954126238	-1.23004037488556	-0.884992334147933	8
ENSG00000069431	ABCC9	-0.950718528851365	-0.832442319812077	0.328408962959826	1.51387772023477	-0.0591258345311565	3
ENSG00000069482	GAL	1.77565643789867	-0.2522200195839	-0.450974505211756	-0.586050603232511	-0.486411309870501	6
ENSG00000069493	CLEC2D	-0.819332306854895	0.170322732914516	0.83256148646235	1.04613450958436	-1.22968642210633	5
ENSG00000069509	FUNDC1	1.05651822610121	-1.41484556597044	-0.457476504034854	0.820169162198859	-0.00436531829477767	6
ENSG00000069535	MAOB	1.61456230158197	-0.591979549005755	0.273806530622361	-0.395740502336554	-0.900648780862019	6
ENSG00000069667	RORA	-1.52746804744961	0.241114574191411	-0.388130576914569	1.00474032993664	0.669743720236134	10
ENSG00000069696	DRD4	1.70211497774337	-0.466092756813676	-0.644400127326977	0.0884429510106702	-0.680065044613388	6
ENSG00000069702	TGFBR3	-0.222040699728836	0.140169405036256	1.64493247961789	-0.824352719592187	-0.738708465333123	4
ENSG00000069712	KIAA1107	0.868258668243191	0.262982503964929	-0.383442050683968	0.798776336133571	-1.54657545765772	7
ENSG00000069812	HES2	0.158119846239014	-0.721557362373725	-0.700167007391486	-0.408815596254949	1.67242011978115	2
ENSG00000069849	ATP1B3	0.804646846704612	0.694799875833677	-0.856015602219473	-1.30406785696776	0.660636736648949	9
ENSG00000069869	NEDD4	-0.810092956106076	0.27913151526847	0.142307865729279	-1.06465249549234	1.45330607060067	2
ENSG00000069943	PIGB	0.940193730199836	0.508379998215878	0.119883585586551	-1.68233340592807	0.113876091925813	9
ENSG00000069956	MAPK6	1.51531453672776	0.406752343142031	-0.441050972788225	-1.09203630731773	-0.388979599763829	9
ENSG00000069966	GNB5	1.24072057627868	0.296459371233552	-0.595969337011152	-1.35790630702195	0.416695696520872	9
ENSG00000069974	RAB27A	-0.353653400578912	1.29614442408523	-0.262881620126691	-1.31317454080296	0.633565137423334	1
ENSG00000069998	CECR5	0.934593231832509	0.846936061990631	0.341290677051429	-0.920745211420301	-1.20207475945427	8
ENSG00000070010	UFD1L	1.0811592932728	-1.27673151193813	-0.158110441356554	-0.569317703080526	0.923000363102408	2
ENSG00000070018	LRP6	1.02138649713763	-0.510915034089399	1.02771845775657	-0.291331364698383	-1.24685855610642	7
ENSG00000070019	GUCY2C	1.44240803911655	0.663845577044466	-0.702084538720338	-0.702084538720338	-0.702084538720338	9
ENSG00000070031	SCT	-0.175685936165732	-0.750447857025693	-0.52223429946574	1.74505346409634	-0.296685371439176	3
ENSG00000070047	PHRF1	1.0520271574165	0.239045306445524	0.519612961404605	-0.224604981481163	-1.58608044378547	8
ENSG00000070061	IKBKAP	0.912457519599896	0.483252420195573	0.744040836968171	-0.856538901940658	-1.28321187482299	8
ENSG00000070081	NUCB2	-0.234910008554786	-1.27873907521888	0.864929009976369	-0.497565326506284	1.14628540030358	2
ENSG00000070087	PFN2	-0.169510155319353	0.388927435020747	0.89722877257458	-1.65183413357228	0.535188081296306	2
ENSG00000070159	PTPN3	0.731148914585637	0.78481562183854	0.496821361671159	-1.54351523643664	-0.469270661658698	9
ENSG00000070182	SPTB	-0.789300780495163	-0.949907196398373	-0.273771261977751	1.43874370223418	0.574235536637107	10
ENSG00000070190	DAPP1	-0.676066900746848	-0.874654739042474	0.0330892618453143	1.6602632802213	-0.142630902277293	3
ENSG00000070193	FGF10	-1.08078658714028	0.768316073937729	0.945558791579851	0.440789654835909	-1.07387793321321	5
ENSG00000070214	SLC44A1	1.66606242635161	0.00966616753076381	-0.204663902863112	-0.511657848315702	-0.959406842703565	6
ENSG00000070269	TMEM260	1.03140275169979	0.555442496674745	0.560712069201786	-1.13416390527888	-1.01339341229744	8
ENSG00000070366	SMG6	0.430122470580812	1.35688298451638	0.182478312476873	-0.960953895871858	-1.00852987170221	8
ENSG00000070367	EXOC5	1.66934304495608	-0.972968634321895	0.0161060195550223	-0.435462211141611	-0.277018219047594	6
ENSG00000070371	CLTCL1	1.69529244216982	-0.824533656715778	-0.331891254301191	0.0394245123746482	-0.578292043527496	6
ENSG00000070404	FSTL3	-0.65842897841277	-0.549073786406043	-0.200397217559114	-0.352870483743446	1.76077046612137	2
ENSG00000070413	DGCR2	0.641962706385144	-0.0966789597409809	1.10264349132735	-0.115132784948723	-1.53279445302279	7
ENSG00000070423	RNF126	0.747353243639098	0.760795834869208	0.45447835196776	-0.377099746915593	-1.58552768356048	8
ENSG00000070444	MNT	-0.0645507454981514	1.46374702161976	0.269568866253298	-0.393802309430837	-1.27496283294407	1
ENSG00000070476	ZXDC	0.444910621879796	-0.0502766780835987	0.613275626181653	0.703414038089682	-1.71132360806753	7
ENSG00000070495	JMJD6	-0.849075384564255	-0.821541071731916	-0.474816763934714	1.26924707624738	0.87618614398351	10
ENSG00000070501	POLB	0.894070259369891	0.877405977508569	-0.113424268477409	-0.106750450798087	-1.55130151760296	8
ENSG00000070540	WIPI1	-0.389891378903696	-1.26413221353195	-0.294632956737355	0.610656233556279	1.33800031561672	10
ENSG00000070601	FRMPD1	-0.959737485365738	-1.01139073546021	1.27494564019966	0.654825100938288	0.0413574796879973	4
ENSG00000070610	GBA2	1.34206967502662	0.365233003626949	-0.137600806953299	-0.146674676752491	-1.42302719494778	8
ENSG00000070614	NDST1	0.126926826997937	-0.804005813096267	0.848529791449835	-1.22650665620114	1.05505585084964	2
ENSG00000070669	ASNS	0.289021810737792	1.58194491636548	-0.890174485326531	-0.225321273522403	-0.755470968254338	1
ENSG00000070718	AP3M2	0.390724946127076	1.38881885280655	0.141662346299688	-1.12328599114662	-0.797920154086688	9
ENSG00000070731	ST6GALNAC2	-0.621932981560056	-0.373537801724931	-0.688179607617203	-0.047764143906569	1.73141453480876	2
ENSG00000070756	PABPC1	0.552126530967246	1.31797709427133	0.0275098073617182	-0.668746442890519	-1.22886698970978	8
ENSG00000070759	TESK2	0.909259392428404	1.24247229993817	-0.551405924364699	-0.65026264071031	-0.95006312729157	9
ENSG00000070761	C16orf80	-0.891901320546053	-0.325985737272429	-0.204727286451939	1.72235026850232	-0.299735924231904	3
ENSG00000070770	CSNK2A2	0.640277104493492	1.03205572028207	-0.0217295649005335	-0.0630062524922915	-1.58759700738273	8
ENSG00000070778	PTPN21	-0.80415207661112	-1.10314192278736	-0.0141738081642972	1.34165198636811	0.579815821194672	10
ENSG00000070785	EIF2B3	0.886882911085946	0.224425624237684	-1.72375276610179	0.352071186584477	0.260373044193682	6
ENSG00000070808	CAMK2A	-1.01153201589025	-0.454592843957364	-0.392108520884048	1.59615626425526	0.262077116476398	3
ENSG00000070814	TCOF1	1.1485814718112	0.737126474373862	0.13477654545718	-0.812680033214065	-1.20780445842818	8
ENSG00000070831	CDC42	-0.32894733059412	-1.3358780209302	0.143793515130191	0.0786882023351932	1.44234363405895	10
ENSG00000070882	OSBPL3	0.271679421149737	-0.44978733010862	-0.76798515643315	-0.685947514981625	1.63204058037366	2
ENSG00000070886	EPHA8	1.78645609355906	-0.515550385670156	-0.408866602746857	-0.385992797290021	-0.476046307852021	6
ENSG00000070950	RAD18	0.861760178201792	0.838267242345427	0.463312204249409	-1.08184440071104	-1.08149522408559	8
ENSG00000070961	ATP2B1	-1.05513437012734	-0.858466168758574	-0.0824445124130014	1.27264251494238	0.723402536356539	10
ENSG00000070985	TRPM5	-0.56567519195465	1.76205740117292	-0.213666145954745	-0.338638288714294	-0.644077774549234	1
ENSG00000071051	NCK2	0.406035791314052	-1.52807863506359	1.19115998641255	0.164011212748139	-0.233128355411148	7
ENSG00000071054	MAP4K4	-0.521912937871367	-1.49239373148653	0.680242365693543	0.395210173083139	0.938854130581222	10
ENSG00000071073	MGAT4A	0.587091935375503	-1.11689960441843	0.504663911330273	1.05008249696871	-1.02493873925606	7
ENSG00000071082	RPL31	-0.8844474621968	0.310932012672159	0.751216567933421	1.03830488580525	-1.21600600421403	5
ENSG00000071127	WDR1	1.03048595219111	-0.584671372418874	-0.524573330371672	-1.03718447307979	1.11594322367923	2
ENSG00000071189	SNX13	-0.348082077530776	-0.699281557877902	1.02486166213373	1.09274291314492	-1.07024093986997	3
ENSG00000071205	ARHGAP10	-1.63128260027695	0.849304946478913	-0.205329374447604	0.703475402753929	0.283831625491714	1
ENSG00000071242	RPS6KA2	0.398183029152025	-1.52108545420779	0.13970400476602	-0.22425431555539	1.20745273584514	2
ENSG00000071243	ING3	-0.584536754261958	0.195560966047471	1.02029144178438	0.7751671679039	-1.40648282147379	5
ENSG00000071246	VASH1	-1.04902505947362	-0.740932343790316	0.156675227145671	0.112292727406606	1.52098944871166	10
ENSG00000071282	LMCD1	-0.385018306434305	-1.49555930420367	0.142124460988217	1.07386556444502	0.664587585204747	10
ENSG00000071462	WBSCR22	1.54532951258937	-0.591795819301997	-0.0626274214929904	-1.10156106120096	0.210654789406575	6
ENSG00000071537	SEL1L	-1.10826795682413	-0.701014118759756	0.267784695993601	0.0564288692224186	1.48506851036787	10
ENSG00000071539	TRIP13	0.932788364668234	0.701776609931201	0.524753939189927	-1.20359426651945	-0.955724647269915	8
ENSG00000071553	ATP6AP1	-0.709143505949838	0.21064138173485	-0.181672727481171	-0.922533222232649	1.60270807392881	2
ENSG00000071564	TCF3	0.578188011525352	0.415373598960219	0.928640425450144	-0.335257577738087	-1.58694445819763	8
ENSG00000071575	TRIB2	-0.94534427493462	-0.305608837640207	-0.165713976517701	1.70382174074255	-0.287154651650023	3
ENSG00000071626	DAZAP1	1.29429454397187	0.656298425388714	-0.0351223021922161	-0.786962830272857	-1.12850783689551	9
ENSG00000071655	MBD3	-0.590115113977165	-0.277780038786581	1.77752763490114	-0.480137015054385	-0.429495467083013	4
ENSG00000071794	HLTF	1.5516688430578	0.039503146904856	0.142804943630361	-0.683914645857149	-1.05006228773587	6
ENSG00000071859	FAM50A	-1.01729047557149	-0.248777200943726	-0.819877268465821	0.876467066408356	1.20947787857269	10
ENSG00000071889	FAM3A	-0.532224189074099	-1.03576300692787	1.19413451474592	0.944584658438741	-0.57073197718269	3
ENSG00000071894	CPSF1	0.30955237290832	1.2530402195456	0.408207095181678	-0.649685084178777	-1.32111460345683	8
ENSG00000071909	MYO3B	1.47943357402266	0.189756115016635	-0.826644106668814	0.185763825746571	-1.02830940811705	6
ENSG00000071967	CYBRD1	-0.881202409373649	-1.07498119760646	0.0901527145913916	0.533807116569369	1.33222377581935	10
ENSG00000071991	CDH19	-0.323252999958625	-0.48703241364632	-0.48703241364632	1.78435024089759	-0.48703241364632	3
ENSG00000071994	PDCD2	0.6394932196579	0.821378753411168	0.591008558723827	-0.545322231176506	-1.50655830061639	8
ENSG00000072041	SLC6A15	0.974239050947817	1.10450181390946	-0.253681178694733	-1.1374280925489	-0.687631593613639	9
ENSG00000072042	RDH11	1.42825589580635	0.505763382960982	-0.511286118223149	-1.17547334536313	-0.247259815181059	9
ENSG00000072062	PRKACA	-1.31733010467933	-0.666309229390588	0.410897814272993	1.24193549092665	0.330806028870271	10
ENSG00000072071	LPHN1	1.31171369820395	0.333983476482637	0.366076687714806	-0.934357100459446	-1.07741676194195	8
ENSG00000072080	SPP2	1.07770189296883	-0.249700043797227	0.804104289495359	-0.184491676554823	-1.44761446211214	7
ENSG00000072110	ACTN1	0.809074677047511	-0.349213467323371	-0.191248570679117	-1.38945486262135	1.12084222357633	2
ENSG00000072121	ZFYVE26	1.29283171194568	-0.448828714784569	0.72018307594211	-0.343267187920308	-1.22091888518291	7
ENSG00000072133	RPS6KA6	0.946488508048503	1.16427718872875	-0.553429379512897	-1.11755298515493	-0.439783332109433	9
ENSG00000072134	EPN2	0.847138315892632	0.392050226340637	0.631824491915523	-0.235825797670467	-1.63518723647833	8
ENSG00000072135	PTPN18	-0.0801034911150725	1.26148465065629	0.730547871009579	-0.813129984958511	-1.09879904559228	8
ENSG00000072163	LIMS2	-0.715064867941434	-1.06344879308216	-0.329199573757989	1.17251368571969	0.935199549061899	10
ENSG00000072182	ASIC4	-0.88238518558944	-0.66010124953736	0.163409735665629	1.64033635966825	-0.261259660207076	3
ENSG00000072195	SPEG	-1.04498764819322	-0.861285231889366	0.329103586818338	1.42660811947163	0.15056117379262	3
ENSG00000072201	LNX1	1.32867361959874	-0.732496191317455	-0.387519023808062	0.769208313728218	-0.977866718201438	6
ENSG00000072210	ALDH3A2	1.28206415746969	0.379147995730658	0.373775632824233	-1.05112739667447	-0.983860389350112	8
ENSG00000072274	TFRC	0.511354778647125	0.872407445804261	-0.0735639874942282	-1.68313126013106	0.372933023173899	9
ENSG00000072310	SREBF1	-0.761475092578648	1.40403513486705	0.289181318045197	-1.14819912287482	0.216457762541218	1
ENSG00000072315	TRPC5	1.34326764566592	0.806169819624518	-0.734483380978785	-0.656443294769657	-0.758510789542	9
ENSG00000072364	AFF4	-0.922565654950032	-1.20608427587121	0.471663206382882	1.05093959062616	0.606047133812198	10
ENSG00000072401	UBE2D1	1.51858600506894	0.0540224590112856	-0.0411307952523955	-1.27395849743074	-0.257519171397094	6
ENSG00000072415	MPP5	-0.233226828989146	1.64407327903446	0.0752470605608307	-1.00066004897079	-0.48543346163535	1
ENSG00000072422	RHOBTB1	-0.821402935934523	-0.926145725071074	1.1577818907391	0.985238360704517	-0.395471590438025	3
ENSG00000072501	SMC1A	0.733974471194769	0.830391381270213	0.568545265757262	-0.771639522222457	-1.36127159599979	8
ENSG00000072506	HSD17B10	1.08974821171837	0.441465785179693	0.495122841733035	-1.4127867843651	-0.613550054266	9
ENSG00000072518	MARK2	1.57580490523658	0.256299679780433	-0.186512091754602	-0.646196009562736	-0.99939648369968	6
ENSG00000072571	HMMR	1.05620935865759	0.767535176047251	0.258019679404326	-0.865003928076164	-1.21676028603301	8
ENSG00000072609	CHFR	1.64601355116116	-0.776466267139374	-0.700879702131328	0.217562542204417	-0.386230124094871	6
ENSG00000072657	TRHDE	-0.490053855449564	-0.705779633752595	0.671318006834429	-0.893920492354804	1.41843597472253	2
ENSG00000072682	P4HA2	-1.23649900674482	-0.588642164106685	-0.0222083948354228	0.466658816365328	1.3806907493216	10
ENSG00000072736	NFATC3	-0.592518886932164	0.435297299415482	1.09981934324933	0.478856314038858	-1.42145406977151	5
ENSG00000072756	TRNT1	1.11798096708951	-0.172920989146124	0.39747596230415	0.24005754052009	-1.58259348076762	7
ENSG00000072778	ACADVL	0.7869980273789	-0.713723985023563	-0.480806223424489	-0.926945259527104	1.33447744059625	2
ENSG00000072786	STK10	0.181760550492055	-0.39318180327065	-0.428701503483257	-0.988316935131473	1.62843969139333	2
ENSG00000072803	FBXW11	0.98257002029577	-1.15632006004678	0.18838822401215	0.904240783243427	-0.918878967504561	7
ENSG00000072818	ACAP1	1.77880382000882	-0.285299595540532	-0.552751950539127	-0.52702846008642	-0.413723813842736	6
ENSG00000072832	CRMP1	-0.0582067361964377	0.628096427738499	0.189959329662829	-1.66002939671228	0.900180375507385	2
ENSG00000072840	EVC	-1.16831111954121	-0.269913600432784	1.58511335686562	-0.212769991456982	0.0658813545653526	4
ENSG00000072849	DERL2	-0.544730712286029	-1.2357290533753	1.45564334039328	0.210323597654227	0.114492827613824	4
ENSG00000072864	NDE1	0.806689485586047	0.541296565631418	0.828582432194335	-1.11037579494122	-1.06619268847058	8
ENSG00000072952	MRVI1	-0.0685981506996236	0.192307536915149	-0.418749234337403	-1.21985656537388	1.51489641349576	2
ENSG00000072954	TMEM38A	-0.772544531772735	-1.12345415818047	-0.139520584286962	1.17570005239381	0.859819221846359	10
ENSG00000072958	AP1M1	-1.55843141761571	0.342913758892954	1.19931547644338	0.0953157778566635	-0.0791135955772906	4
ENSG00000073008	PVR	-0.436967723256818	-0.855942852382881	0.0639584567766738	-0.461899503015024	1.69085162187805	2
ENSG00000073009	IKBKG	1.01098860069935	-0.346408439417074	1.11617001254451	-1.00555354553503	-0.775196628291759	8
ENSG00000073050	XRCC1	0.00851435325450242	1.1171690958285	0.668846867642277	-0.308055918815066	-1.48647439791021	8
ENSG00000073060	SCARB1	0.84491557686935	0.6731033148951	0.65406738927893	-0.933947710652522	-1.23813857039086	8
ENSG00000073067	CYP2W1	-0.580288909385635	-0.707323929163069	-0.0614420164079463	1.73500091103556	-0.385946056078907	3
ENSG00000073111	MCM2	0.781409560941488	0.886809246642209	0.492126311303776	-0.963479295903848	-1.19686582298363	8
ENSG00000073150	PANX2	1.76176192921997	-0.213324849051214	-0.596253799645457	-0.620733128228796	-0.331450152294504	6
ENSG00000073169	SELO	-0.0987775532911287	1.55908778212426	0.258813059902365	-0.773504565390225	-0.94561872334527	1
ENSG00000073282	TP63	-0.795134890983276	-0.788702583015819	-0.4171123664418	1.53424728858841	0.466702551852484	10
ENSG00000073331	ALPK1	-1.08159197662751	-1.08949641298545	0.759320950829329	0.893025918285614	0.518741520498023	10
ENSG00000073350	LLGL2	1.73200474000286	-0.011857718457383	-0.598823406566107	-0.480830178062558	-0.64049343691681	6
ENSG00000073417	PDE8A	-0.870032698929923	-1.08906806015474	0.950784591427369	-0.0635706264143133	1.0718867940716	10
ENSG00000073464	CLCN4	-0.881640202886179	-1.24634496343594	0.557773736097193	0.534664827587721	1.0355466026372	10
ENSG00000073536	NLE1	0.503015923850579	1.32041037048888	0.102574694909753	-0.700103213801968	-1.22589777544724	8
ENSG00000073578	SDHA	-1.32470857261401	1.49199460135697	-0.0920751953750615	-0.10002789193651	0.0248170585686095	1
ENSG00000073584	SMARCE1	-0.73699803400014	0.391083653567237	1.40603395499708	0.0884178739962404	-1.14853744856042	5
ENSG00000073605	GSDMB	0.298334795017088	0.224250339405452	-0.252145052874339	1.23601336182659	-1.50645344337479	5
ENSG00000073614	KDM5A	-0.406294837377718	-0.854173939335182	1.32026569626077	0.794850605689062	-0.854647525236936	4
ENSG00000073670	ADAM11	0.663145098102001	0.883691284989693	0.382047462136245	-0.342721895519319	-1.58616194970862	8
ENSG00000073711	PPP2R3A	1.198101050488	0.494481858873063	0.31509494495348	-0.683392709846755	-1.32428514446779	8
ENSG00000073712	FERMT2	1.04456369919278	-1.17748101527281	1.04944273490989	-0.481561437545829	-0.434963981284026	7
ENSG00000073756	PTGS2	-0.553957894242549	-0.46152466261396	-0.373515813937295	-0.395444239031694	1.7844426098255	2
ENSG00000073792	IGF2BP2	0.829817657820441	0.743768620963778	0.383236605464768	-0.388173059218646	-1.56864982503034	8
ENSG00000073803	MAP3K13	0.251219515649766	-0.75296216092687	1.00449960601428	0.805630270754444	-1.30838723149162	7
ENSG00000073849	ST6GAL1	1.54803272518054	0.372298006850864	-0.271480943484557	-0.698063981420179	-0.950785807126672	9
ENSG00000073910	FRY	0.0770427549851558	-1.2305445355188	-0.380992644966218	0.00654602517833333	1.52794840032153	2
ENSG00000073921	PICALM	-1.52293492210446	-0.437733174141937	0.286953095914436	0.891884134023257	0.781830866308704	10
ENSG00000073969	NSF	-0.833502620702676	-0.650986414327704	-0.699556922365632	1.03251747473439	1.15152848266162	10
ENSG00000074047	GLI2	1.28593406618359	-0.256285893525824	0.789808731086413	-0.938724781094247	-0.880732122649927	8
ENSG00000074054	CLASP1	-0.206477938606753	-0.913423938813677	0.8455825205079	1.22582588420849	-0.951506527295954	3
ENSG00000074071	MRPS34	1.12913778600042	0.821904085360323	-0.00333420511720707	-1.25019405929088	-0.697513606952654	9
ENSG00000074181	NOTCH3	0.495239730939784	0.018615630138546	1.38610639896478	-1.06866696418701	-0.831294795856106	8
ENSG00000074201	CLNS1A	0.715451379982759	0.753775140671296	0.648521570177474	-0.700444383493796	-1.41730370733773	8
ENSG00000074211	PPP2R2C	1.78141626446258	-0.496188514355616	-0.490219292804088	-0.287916655676982	-0.507091801625895	6
ENSG00000074219	TEAD2	0.943263818839857	0.0448063791273323	0.952101303484376	-0.570325737193861	-1.36984576425771	8
ENSG00000074266	EED	0.435435443724728	0.981814233647158	0.451715489369963	-0.265201437524069	-1.60376372921778	8
ENSG00000074317	SNCB	1.68114332641732	0.16482805482665	-0.588884030331438	-0.698078283001792	-0.559009067910742	6
ENSG00000074319	TSG101	-0.48494857187368	-1.07606309111189	-0.35941983177185	1.52311090994692	0.397320584810494	10
ENSG00000074356	C17orf85	0.860895055709421	0.368494727603064	0.639086847797988	-0.238164727759928	-1.63031190335055	8
ENSG00000074370	ATP2A3	1.02711388737783	0.588987621050737	-0.0413574793122716	0.0361906196387966	-1.61093464875509	8
ENSG00000074410	CA12	-0.108338594681453	0.109289229048056	-0.802502666398694	-0.826225461919521	1.62777749395161	2
ENSG00000074416	MGLL	-0.950919609078738	-0.726851143112741	-0.450860482554378	0.842247304315621	1.28638393043024	10
ENSG00000074527	NTN4	-0.562203872783156	-0.269547301430699	-0.254529862863312	-0.672688902242373	1.75896993931954	2
ENSG00000074582	BCS1L	-0.188925478436113	0.623256409959021	1.36593412844023	-0.68846601781812	-1.11179904214502	8
ENSG00000074590	NUAK1	-0.43881670144953	-0.641263465418035	-0.367987112605094	-0.327716599737354	1.77578387921001	2
ENSG00000074603	DPP8	-0.815497156730246	-1.27440902127287	0.554062096732541	1.10292405991325	0.432920021357331	10
ENSG00000074621	SLC24A1	1.04981645362142	0.971219896723715	-0.077681366543835	-1.14526988037568	-0.79808510342562	9
ENSG00000074657	ZNF532	1.36825745026278	0.352429328186625	0.249713221456942	-0.99113066806351	-0.979269331842832	8
ENSG00000074660	SCARF1	1.76292935099243	-0.165774061747803	-0.502700702932883	-0.466680268436131	-0.627774317875617	6
ENSG00000074695	LMAN1	-0.262739702626478	1.43405581427778	-0.558924118808454	-1.13521457979728	0.522822586954435	1
ENSG00000074696	PTPLAD1	1.03399003322689	0.534698435190852	0.57133920174403	-0.950275585942644	-1.18975208421913	8
ENSG00000074706	IPCEF1	0.021654434706713	-0.306399543535332	1.63396334054427	-0.2711123447807	-1.07810588693495	4
ENSG00000074755	ZZEF1	-0.814998741987316	-1.16652419929942	0.613487999596729	1.25972182922539	0.108313112464628	3
ENSG00000074800	ENO1	0.527234375071237	1.09675121959293	0.276122453123516	-1.51472727910962	-0.385380768678062	9
ENSG00000074842	C19orf10	-0.552491176748842	0.274631930542135	-0.294171209403369	-1.01190323666544	1.58393369227552	2
ENSG00000074855	ANO8	1.36364356662242	-0.0233427903890276	0.554280329919102	-0.809475696627607	-1.08510540952488	8
ENSG00000074935	TUBE1	-0.128992310294671	1.37471196313007	0.360989465101609	-0.223502201222752	-1.38320691671426	1
ENSG00000074964	ARHGEF10L	1.67596364167091	-0.721534116784024	-0.456048913551369	-0.660506584025971	0.162125972690451	6
ENSG00000075035	WSCD2	1.67097413777659	-0.615686476212516	0.18428609497152	-0.504585575876981	-0.734988180658609	6
ENSG00000075043	KCNQ2	1.03278830284984	0.98538756513336	-0.0455244467416024	-0.900855312637901	-1.0717961086037	9
ENSG00000075089	ACTR6	1.34457850386726	0.496649469546414	0.118512773534354	-1.05440484946445	-0.905335897483576	9
ENSG00000075131	TIPIN	1.04607902062948	0.832717220225274	0.0918676243822829	-0.623321560906591	-1.34734230433045	8
ENSG00000075142	SRI	0.850246634459808	0.511436781714124	0.67648349631044	-1.50940017865038	-0.528766733833992	8
ENSG00000075151	EIF4G3	0.917546585396672	-1.32921612358441	0.717904423997445	-0.796940437132149	0.490705551322441	6
ENSG00000075188	NUP37	0.972575022992099	1.1259515541474	-0.25455847796692	-0.818490744785804	-1.02547735438678	9
ENSG00000075213	SEMA3A	-0.224755850000192	1.07293577567864	0.660981488369203	-1.53644163275412	0.027280218706472	1
ENSG00000075218	GTSE1	0.883175023814642	0.742646178933439	0.54095598341968	-0.964259530761804	-1.20251765540596	8
ENSG00000075223	SEMA3C	-1.13357133677843	-0.966490295286919	0.260207063054968	0.81826017986295	1.02159438914743	10
ENSG00000075234	TTC38	1.14293221901658	-0.218260057032031	0.863152024059347	-1.28306464247956	-0.504759543564327	8
ENSG00000075239	ACAT1	-0.271434411145861	-1.40931453102371	0.826662572271181	-0.240809022157366	1.09489539205576	10
ENSG00000075240	GRAMD4	0.163325400556009	1.10081508238997	0.797075192340687	-1.06140617889155	-0.99980949639512	8
ENSG00000075275	CELSR1	1.28230686040665	0.629318506319681	-0.112377394906179	-1.30482271642527	-0.494425255394885	9
ENSG00000075292	ZNF638	0.920604188513646	0.483820949282173	0.270988506102325	0.0112528377542733	-1.68666648165241	8
ENSG00000075303	SLC25A40	0.474330225527656	0.426375274782133	1.13359102112717	-0.671456786669755	-1.3628397347672	8
ENSG00000075336	TIMM21	0.975197797671871	1.07403426622554	-0.111975356859608	-0.911974159658298	-1.02528254737951	9
ENSG00000075340	ADD2	1.32354368009046	0.736310093585821	-0.263006352433979	-0.792176583735111	-1.00467083750719	9
ENSG00000075388	FGF4	1.04954109159482	-0.0593176588859482	-1.08978457632183	0.972374274080268	-0.872813130467314	6
ENSG00000075391	RASAL2	0.312893068983128	-1.38126794625571	-0.670960057635703	0.99490001352376	0.74443492138452	10
ENSG00000075399	VPS9D1	-1.0762441900227	-1.09871791856626	0.721062530950087	0.557134868399582	0.896764709239294	10
ENSG00000075407	ZNF37A	0.511802680708202	-1.22512479026471	1.22944250748266	0.28618618481719	-0.802306582743332	7
ENSG00000075413	MARK3	0.400639655207525	0.258029428290255	0.875153389314084	0.189830509555885	-1.72365298236775	7
ENSG00000075415	SLC25A3	-0.758508012147034	1.70791959910593	-0.100394496870525	-0.686407546441342	-0.162609543647026	1
ENSG00000075420	FNDC3B	-1.01385266361896	-0.675258750070451	0.232138113271699	-0.108428726106951	1.56540202652466	10
ENSG00000075426	FOSL2	-0.883394604994878	-1.07672823956583	0.66089121332812	0.025319548474069	1.27391208275852	10
ENSG00000075429	CACNG5	1.76473755719714	-0.566229476436628	-0.166838268167505	-0.465440336156375	-0.566229476436628	6
ENSG00000075461	CACNG4	-0.433985866915786	-1.40498707711396	0.536902145179921	1.24336532621936	0.0587054726304643	3
ENSG00000075539	FRYL	-0.255347150866404	0.00587329347101025	1.31797834660182	0.367647276721028	-1.43615176592746	5
ENSG00000075568	TMEM131	-0.802227966480148	-0.124739228983877	1.73597490857092	-0.401784350292235	-0.407223362814657	4
ENSG00000075618	FSCN1	-0.0357203916700302	1.46392153019005	0.283461472986969	-0.461868774171143	-1.24979383733585	1
ENSG00000075624	ACTB	1.17040371069971	-0.3619471306971	0.592747731253941	-1.46418345277738	0.0629791415208287	6
ENSG00000075643	MOCOS	1.58313990286751	-0.230090347158655	-0.76180492336818	-0.881111270459504	0.289866638118832	6
ENSG00000075651	PLD1	-0.784783676319778	-0.702187086705093	1.6805567171565	0.058189661071912	-0.251775615203543	4
ENSG00000075673	ATP12A	1.73773410752072	-0.0244411828913354	-0.54251732652667	-0.585387799051358	-0.585387799051358	6
ENSG00000075702	WDR62	1.16980573821454	0.580064334521136	0.337220654048946	-1.00238541790816	-1.08470530887646	8
ENSG00000075711	DLG1	-0.819356004735461	1.58940658554625	0.327739505506001	-0.763904023260553	-0.333886063056232	1
ENSG00000075785	RAB7A	0.243546560475115	-0.242338597826846	-0.590621403944986	-1.00132941536319	1.59074285665991	2
ENSG00000075790	BCAP29	0.553559296059304	-0.189561423650409	-0.0793814863775958	-1.48596624260112	1.20134985656983	2
ENSG00000075826	SEC31B	-1.02058497778771	0.399924916204625	0.772377273901125	0.970657197595771	-1.12237440991381	5
ENSG00000075856	SART3	0.848964331834582	0.639347427076306	0.430203710429102	-0.309231429337594	-1.6092840400024	8
ENSG00000075884	ARHGAP15	-0.63888374008457	-0.689046990729918	1.56498824354384	0.447048593173147	-0.684106105902497	4
ENSG00000075891	PAX2	-0.910627252794922	-0.156865364865231	1.46674539170251	0.476800930176343	-0.876053704218697	4
ENSG00000075914	EXOSC7	1.08939023826379	1.03641739090213	-0.36314377315974	-1.04519553895926	-0.717468317046921	9
ENSG00000075945	KIFAP3	-1.69718331000278	0.0261144815647154	0.204239151773166	0.75966902667606	0.707160649988838	10
ENSG00000075975	MKRN2	-1.54191404839373	-0.390409000009252	0.876238571907782	0.796957312603578	0.259127163891629	10
ENSG00000076003	MCM6	1.14729368487423	0.711123019012008	0.207609747288046	-1.01448221328297	-1.05154423789131	8
ENSG00000076043	REXO2	0.614207850841533	0.805884169935579	-0.863097216030411	-1.29664302310621	0.739648218359513	9
ENSG00000076053	RBM7	1.04712584596985	1.09026205638847	-0.769497831433429	-0.378030361530893	-0.989859709394002	9
ENSG00000076067	RBMS2	-1.18024258867345	0.256963314245737	1.5207760224234	-0.456444909632897	-0.141051838362781	4
ENSG00000076108	BAZ2A	0.873063634260295	0.946781439630855	-0.151677082117568	-0.153287905095251	-1.51488008667833	8
ENSG00000076201	PTPN23	1.33811480029872	0.404363667745074	-0.131711799068141	-0.200690777698006	-1.41007589127765	8
ENSG00000076242	MLH1	0.693887350461247	0.816158460933199	0.61281757881902	-0.727077212668478	-1.39578617754499	8
ENSG00000076248	UNG	1.48302017750048	0.472499210476851	-0.251363687515124	-1.02834273629055	-0.67581296417165	9
ENSG00000076258	FMO4	-0.0898005145097754	-1.4229207065365	0.505276715810925	-0.272311173014993	1.27975567825034	2
ENSG00000076321	KLHL20	-1.43627746814002	-0.531145030779714	0.1877574507788	1.02424846189247	0.75541658624846	10
ENSG00000076344	RGS11	-0.0407502204920128	-0.871924208383541	-0.60073672055091	-0.17388465018228	1.68729579960874	2
ENSG00000076351	SLC46A1	-0.787914124432169	1.37163235150019	0.692819967769776	-0.319645780900811	-0.956892413936984	1
ENSG00000076356	PLXNA2	-1.16860610391039	-0.174513471413291	1.21906272982342	0.807043802623724	-0.68298695712347	4
ENSG00000076382	SPAG5	0.92034802385018	0.675988728025305	0.570500443162104	-0.976329186206432	-1.19050800883116	8
ENSG00000076513	ANKRD13A	-0.927966623224435	-0.9487802990691	-0.161032266965044	1.28012750074957	0.757651688509013	10
ENSG00000076554	TPD52	1.67483244834979	0.110208405721302	-0.532737272282246	-0.386517438699541	-0.865786143089302	6
ENSG00000076555	ACACB	1.19547652727884	-0.386598475599642	0.904882575517268	-0.597962110056866	-1.1157985171396	7
ENSG00000076604	TRAF4	0.0900521655414438	-1.69408123732856	0.594056845687536	0.864884629411103	0.145087596688475	10
ENSG00000076641	PAG1	-1.26338874723975	-0.79207297616862	1.02823709165614	0.823130114293767	0.204094517458468	10
ENSG00000076650	GPATCH1	0.419632790083123	0.150680963779007	0.77409152059053	0.39977523460766	-1.74418050906032	7
ENSG00000076662	ICAM3	1.58286793943467	-0.159385551694688	-0.932873009807548	-0.734449094502971	0.243839716570539	6
ENSG00000076685	NT5C2	-0.184188585114582	-1.4148686954915	-0.193001494619038	1.29680004258608	0.495258732639033	10
ENSG00000076706	MCAM	-1.05863371701328	-0.874920016607399	1.40501207144388	0.270293808384229	0.258247853792568	4
ENSG00000076716	GPC4	1.43607869665606	-1.0893586505089	0.169059013089817	0.284964381987319	-0.800743441224297	7
ENSG00000076770	MBNL3	-0.183980045543023	-0.333385232181136	1.72614983876902	-0.335289784795443	-0.87349477624942	4
ENSG00000076826	CAMSAP3	1.71941146795751	-0.151211622147844	-0.364782630476609	-0.315713516269676	-0.887703699063383	6
ENSG00000076864	RAP1GAP	1.12115933927632	-0.419895250684363	0.912669475895245	-0.342567510664641	-1.27136605382256	7
ENSG00000076924	XAB2	0.377061052304232	0.602525177891299	0.587949406520572	0.19616072036988	-1.76369635708598	5
ENSG00000076928	ARHGEF1	0.101262127695151	-0.464521173568165	1.52347064072328	0.0443771067616867	-1.20458870161195	7
ENSG00000076944	STXBP2	1.37684828315303	0.739646601403938	-0.622782310577618	-0.582897028315862	-0.910815545663493	9
ENSG00000076984	MAP2K7	0.707825589442545	1.02875661167056	0.309104167957573	-0.667399080684321	-1.37828728838635	8
ENSG00000077009	NMRK2	0.901790075346883	-1.22115453746545	-0.902967499359093	0.869195280150424	0.353136681327238	6
ENSG00000077044	DGKD	-1.11920543300943	-0.0368823077029304	0.347815055494468	1.47614175640997	-0.667869071192073	3
ENSG00000077063	CTTNBP2	1.3414300390158	0.806927596817078	-0.769127295210536	-0.631570612269072	-0.747659728353268	9
ENSG00000077080	ACTL6B	1.44530539752617	-0.833749099654967	0.0808190484831808	0.350135246878168	-1.04251059323255	7
ENSG00000077092	RARB	-0.683757935619094	1.04091149365961	-0.94035881160757	-0.54345409864988	1.12665935221693	2
ENSG00000077097	TOP2B	0.978506893842908	0.263115918372812	0.779266677038573	-0.607927319930558	-1.41296216932374	8
ENSG00000077147	TM9SF3	0.313373877178038	0.850421290556192	-0.0568551336688675	-1.68543508185101	0.578495047785648	9
ENSG00000077150	NFKB2	-0.41193255232343	-0.151875313985849	-0.153501433627543	1.68651316188231	-0.969203861945484	3
ENSG00000077152	UBE2T	0.777509233618449	0.986834000822093	0.342294935622306	-1.26009194800425	-0.846546222058599	8
ENSG00000077157	PPP1R12B	-0.967878330605135	-0.801051770229583	-0.351170026859371	0.90068423459182	1.21941589310227	10
ENSG00000077232	DNAJC10	1.27276922393856	0.434004330319305	-0.126319874287123	-1.47097096076515	-0.109482719205589	9
ENSG00000077235	GTF3C1	0.874023605476708	-0.0674138697302109	0.990073066158222	-0.333868688779549	-1.46281411312517	7
ENSG00000077238	IL4R	0.225384223200251	0.526019595675649	1.20569908095845	-1.36821103391557	-0.588891865918782	8
ENSG00000077254	USP33	0.548187696339033	0.650298859979459	0.627365464001892	-0.133135520087504	-1.69271650023288	8
ENSG00000077264	PAK3	1.46062335457927	-0.966753403018299	0.0512213893388471	0.35226684467858	-0.897358185578393	7
ENSG00000077274	CAPN6	-0.779870689860031	-1.27754720465245	0.500323082595668	1.16395597705848	0.393138834858325	10
ENSG00000077279	DCX	-0.846593313153659	-1.12375440478208	0.408948287021908	1.34383069798638	0.217568732927448	10
ENSG00000077312	SNRPA	0.726584946326267	0.976908589892935	0.368220478618808	-0.692245219020325	-1.37946879581768	8
ENSG00000077327	SPAG6	-0.594861064988082	-0.594779442943903	-0.137493850517201	1.75737483278951	-0.430240474340323	3
ENSG00000077348	EXOSC5	1.75479359606694	-0.396432971103107	-0.158406914801544	-0.503791797245317	-0.69616191291697	6
ENSG00000077380	DYNC1I2	-0.636405377283849	-0.558116695845215	1.17595769051934	-0.965511412885427	0.984075795495158	2
ENSG00000077454	LRCH4	-0.346860230080569	-0.661404269737181	0.925145087938746	1.17797611745184	-1.09485670557283	3
ENSG00000077458	FAM76B	0.28786679851352	0.918953774991631	0.563976109250749	-0.115097371591808	-1.65569931116409	8
ENSG00000077463	SIRT6	0.875454692715882	-0.381548176450306	1.01477473624474	-0.0760439566884554	-1.43263729582186	7
ENSG00000077514	POLD3	0.759690152297556	0.589984552564344	0.759507346462997	-0.684717244427042	-1.42446480689785	8
ENSG00000077522	ACTN2	-0.975139457942921	-1.08168294200483	0.127264289402567	0.989994132072852	0.939563978472329	10
ENSG00000077549	CAPZB	0.974634790694597	-0.575836795699264	-0.543393230225665	-1.02605772465931	1.17065295988964	2
ENSG00000077585	GPR137B	0.0420598557737213	-1.03129600128435	0.469651886500455	-0.875792022081263	1.39537628109144	2
ENSG00000077616	NAALAD2	0.773777513479523	1.35886464315272	-0.59699861629257	-0.865922106239945	-0.669721434099732	9
ENSG00000077684	JADE1	1.58150286139668	0.278395763974629	-0.203724997435406	-0.892836642075338	-0.763336985860561	9
ENSG00000077713	SLC25A43	-0.706479740996057	1.15335648373446	0.609455696931917	-1.31597959840814	0.259647158737815	1
ENSG00000077721	UBE2A	1.26624026478244	-1.37851822474151	-0.148145498742337	-0.339078062878245	0.599501521579653	6
ENSG00000077782	FGFR1	1.47750683036692	0.474993866444445	-0.193873150327563	-0.818559468803911	-0.940068077679894	9
ENSG00000077809	GTF2I	0.984414888127538	0.256333942730327	0.726937507731975	-0.483399698884393	-1.48428663970544	8
ENSG00000077942	FBLN1	0.0207607068137141	0.786749585028706	0.867651737412892	-1.62010597715114	-0.0550560521041733	8
ENSG00000077943	ITGA8	-0.88487294359839	1.58311256565917	0.371626327064526	-0.548005400183101	-0.521860548942202	1
ENSG00000078018	MAP2	0.512005068407985	-1.22739873033059	1.26244664857887	0.220405759665421	-0.767458746321687	7
ENSG00000078043	PIAS2	0.704017839681048	-1.63138386725427	0.652871912755624	0.572580444064013	-0.298086329246422	7
ENSG00000078053	AMPH	0.908817508488282	0.45736232733882	0.789941017226309	-0.987409831895588	-1.16871102115782	8
ENSG00000078061	ARAF	1.5443553094746	-0.346516063635621	0.367767280484502	-1.04172277334954	-0.523883752973944	6
ENSG00000078070	MCCC1	0.208094442196158	1.113325808606	0.709270223152166	-0.739404847523092	-1.29128562643123	8
ENSG00000078098	FAP	-0.514497974619938	-0.51963991675466	-0.288027674712147	-0.458793405995926	1.78095897208267	2
ENSG00000078114	NEBL	1.2666185454598	0.893157797191815	-0.551278449139931	-0.818495778173171	-0.790002115338514	9
ENSG00000078124	ACER3	1.15111208081153	-0.765556863531286	0.990181393882176	-0.972542559486532	-0.403194051675892	6
ENSG00000078140	UBE2K	1.42612737950352	0.139234189299536	0.276277654847114	-0.625330457752321	-1.21630876589785	8
ENSG00000078142	PIK3C3	-0.714018239242656	-0.954051462585354	1.25944518534092	0.878950897869224	-0.470326381382137	4
ENSG00000078177	N4BP2	0.771751166506804	-0.154620906871985	0.70254702671405	0.344189772099795	-1.66386705844866	7
ENSG00000078237	C12orf5	0.359060304740686	-1.37200511018737	-0.561806688154238	0.322010413419638	1.25274108018128	2
ENSG00000078246	TULP3	-0.776294421224156	-0.470276199085168	1.32102227643874	0.807858750173662	-0.882310406303081	4
ENSG00000078269	SYNJ2	-0.244222773529287	-1.57758573660983	0.764815069329408	0.136056391625964	0.920937049183744	10
ENSG00000078295	ADCY2	1.41786289785084	-0.476343379279664	-0.393110579219477	0.579566482640908	-1.12797542199261	6
ENSG00000078304	PPP2R5C	0.447869160219984	1.26961098993278	0.295337980561474	-1.19948704589563	-0.813331084818609	8
ENSG00000078319	PMS2P1	1.20273353942476	0.727117264609952	0.0326216075906924	-0.759854901078393	-1.20261751054701	8
ENSG00000078328	RBFOX1	-1.30484953122328	-0.374180675941969	-0.340219323979849	1.04785433327755	0.971395197867555	10
ENSG00000078369	GNB1	0.774552721713499	0.521290012790146	0.876636361738581	-1.08561451833335	-1.08686457790888	8
ENSG00000078399	HOXA9	-1.63196321134281	0.919496741130581	0.38400804284692	0.544897818672049	-0.216439391306742	5
ENSG00000078401	EDN1	1.43930930049066	-0.227878924103211	-0.872456027913724	-0.896752121957454	0.557777773483732	6
ENSG00000078403	MLLT10	0.835458073893076	0.564350049382766	0.418210142792338	-0.148738162552059	-1.66928010351612	8
ENSG00000078487	ZCWPW1	-0.0697274999180759	-1.40055733341863	0.903067712508363	1.01064993031928	-0.44343280949094	3
ENSG00000078549	ADCYAP1R1	0.205888184459355	-0.589535270074332	1.3559378507267	0.319713196800443	-1.29200396191216	7
ENSG00000078579	FGF20	-0.110299374830142	1.21595970337663	-0.960412255822712	-0.960412255822712	0.815164183098935	1
ENSG00000078596	ITM2A	-0.512302274534444	0.0756405909190916	1.13165918938968	0.703610564231159	-1.39860807000548	5
ENSG00000078618	NRD1	0.896795752537609	0.574426816711956	-0.269475655981555	-1.61848739608535	0.416740482817344	9
ENSG00000078668	VDAC3	0.330643256663886	0.540697269730965	1.1976367684636	-0.925736298414775	-1.14324099644369	8
ENSG00000078674	PCM1	0.450370529030944	-0.316512560299382	1.38303126362805	-0.195535103932845	-1.32135412842677	7
ENSG00000078687	TNRC6C	0.605267177303077	0.575422805906337	0.739015209968217	-0.283922591484183	-1.63578260169345	8
ENSG00000078699	CBFA2T2	-0.622796396333965	-0.22541967503472	0.919915769187181	1.12873058478518	-1.20043028260367	3
ENSG00000078725	BRINP1	1.69042024332797	-0.70566592748271	0.104019597726228	-0.401242614269269	-0.687531299302221	6
ENSG00000078747	ITCH	-0.624959363669946	-0.768429181365129	0.077157351616718	1.69415537703026	-0.3779241836119	3
ENSG00000078804	TP53INP2	-0.871100072777771	-0.954833447873411	-0.167335525350544	0.599824853820485	1.39344419218124	10
ENSG00000078808	SDF4	-0.0428439242903544	-0.122235211330899	-0.173806826928433	-1.22619169341061	1.5650776559603	2
ENSG00000078814	MYH7B	-0.808596657117412	-0.879845407731891	-0.441033676440788	1.29947105371178	0.830004687578311	10
ENSG00000078900	TP73	1.16923670644744	0.0681152296956371	0.756709595772919	-0.813324844835334	-1.18073668708066	8
ENSG00000078902	TOLLIP	-0.903001465611111	-0.220354502574486	-0.865372616851247	0.541792868413877	1.44693571662297	10
ENSG00000078967	UBE2D4	-0.470209233463624	-1.38219022494585	0.510774914073894	0.0760080031007817	1.2656165412348	10
ENSG00000079101	CLUL1	-0.429694482013166	-0.145790285145263	-0.680783826705348	-0.49914912710505	1.75541772096883	2
ENSG00000079102	RUNX1T1	-0.0962742238066472	-1.18651438422014	1.10431316801013	0.910054561783644	-0.731579121766984	7
ENSG00000079112	CDH17	0.238342728628586	0.830314653589384	-1.15993402673244	-0.930106946871952	1.02138359138642	2
ENSG00000079134	THOC1	0.800670846310536	0.651549515019095	0.452166491068747	-0.275211060141025	-1.62917579225736	8
ENSG00000079150	FKBP7	-1.55053822403545	0.0461962383685421	1.16119538906465	-0.13375242809669	0.476899024698951	4
ENSG00000079156	OSBPL6	-0.412597512454708	1.15541845694538	0.968201110149218	-0.639224346454098	-1.07179770818579	5
ENSG00000079215	SLC1A3	0.454720300930025	0.538957802523233	0.884402184543472	-1.63077489334786	-0.247305394648865	8
ENSG00000079246	XRCC5	1.33984306037206	0.5880396536987	-0.00465313516584539	-0.892324526801504	-1.03090505210341	9
ENSG00000079257	LXN	0.0360030637693759	0.228630263300808	-0.619030015825625	-1.14575957541957	1.50015626417501	2
ENSG00000079263	SP140	-0.471130370097786	-0.690009690857255	-0.570671394781596	0.00664107103600647	1.72517038470063	2
ENSG00000079277	MKNK1	-0.487154912709948	1.24444382277946	0.773064194013773	-0.293254363903729	-1.23709874017956	5
ENSG00000079308	TNS1	-1.16744893796578	-0.906037323557488	0.827016232033269	0.201714119469061	1.04475591002094	10
ENSG00000079313	REXO1	1.19417758435736	0.0847749142074786	0.592729883001681	-0.454267246303762	-1.41741513526276	8
ENSG00000079332	SAR1A	0.179302736534701	-1.72572283458872	0.170332499866356	0.604648573221533	0.771439024966127	10
ENSG00000079335	CDC14A	0.640889334065115	1.20268282322149	-0.11574819184504	-0.299673816466028	-1.42815014897554	8
ENSG00000079337	RAPGEF3	0.513164971085516	0.398810416579431	-1.69862726443662	-0.0442050850724378	0.830856961844116	2
ENSG00000079387	SENP1	0.433884603830093	0.567865992511329	0.648933122810476	0.0981785237646676	-1.74886224291657	8
ENSG00000079393	DUSP13	-0.785856126906279	-1.07618477752397	-0.217797656028583	0.956383555320036	1.1234550051388	10
ENSG00000079432	CIC	0.941805617237431	0.0178993714233058	1.00069877639257	-0.672230869482009	-1.2881728955713	8
ENSG00000079435	LIPE	-0.0140799094002346	-0.708569366666772	1.50745627493738	0.284850431962292	-1.06965743083267	7
ENSG00000079459	FDFT1	1.17475376264382	0.708012681745069	0.142306994233229	-0.857683331992205	-1.16739010662991	8
ENSG00000079462	PAFAH1B3	0.726968060698195	0.741993343291422	0.706609093304671	-1.25378737536005	-0.921783121934241	8
ENSG00000079482	OPHN1	-0.882655711636476	-1.18467634481404	1.01178844998573	0.871762233807632	0.183781372657149	10
ENSG00000079616	KIF22	0.874646723513838	0.696611750694319	0.585138607661011	-0.875326906250599	-1.28107017561857	8
ENSG00000079691	LRRC16A	1.77536190664492	-0.317574664620458	-0.325349667229203	-0.575615501054008	-0.556822073741252	6
ENSG00000079739	PGM1	0.0161048139910123	1.66557635760484	-0.385859370327965	-0.992244683440423	-0.30357711782746	1
ENSG00000079785	DDX1	0.756203634604017	0.999802244569311	0.271027936602333	-1.40124255006146	-0.625791265714205	9
ENSG00000079805	DNM2	1.11118253063478	0.967876662217787	-0.287479543078654	-1.16127508051851	-0.63030456925541	9
ENSG00000079819	EPB41L2	-0.262011511253615	0.0274899276835716	1.21187468432075	0.507401880165014	-1.48475498091572	5
ENSG00000079841	RIMS1	1.13194851584103	1.04006197578753	-0.613587047157506	-0.627335517008601	-0.931087927462449	9
ENSG00000079931	MOXD1	-0.813489690293419	-1.04798248622527	1.45622567032025	0.339118058968769	0.066128447229671	4
ENSG00000079950	STX7	-0.323807369344116	1.16930525146437	-0.262269767046981	0.778201596827115	-1.36142971190038	5
ENSG00000079974	RABL2B	-0.0322308610175005	-0.46969399704359	1.72688049471856	-0.46086264459863	-0.764092992058839	4
ENSG00000079999	KEAP1	1.16021433745822	-0.085333967058049	0.77802801421477	-1.32935521826259	-0.523553166352353	8
ENSG00000080031	PTPRH	0.641582488605285	0.0543742227221583	-0.925644795182933	-1.04752826491644	1.27721634877193	2
ENSG00000080189	SLC35C2	1.69335413658184	-0.0591801028698344	-0.145669398415448	-0.746107750361307	-0.742396884935249	6
ENSG00000080200	CRYBG3	-0.577521248785507	-0.909071686647482	1.65666109120881	0.116299371652257	-0.286367527428073	4
ENSG00000080224	EPHA6	1.43142151637193	-0.638919655210838	0.407484956341108	-0.0269375886432716	-1.17304922885893	7
ENSG00000080298	RFX3	-0.217538932184989	0.639921470763252	0.13782719246059	1.01744349925992	-1.57765323029878	5
ENSG00000080345	RIF1	1.13714149859652	0.365715930093943	0.453732081788174	-0.502286870670244	-1.45430263980839	8
ENSG00000080371	RAB21	0.161626488815364	-0.0969233781585325	-0.681275993369609	-0.978233029520261	1.59480591223303	2
ENSG00000080493	SLC4A4	-0.730400129493317	-0.891807392556142	-0.425573048403085	0.580392724054968	1.46738784639758	10
ENSG00000080503	SMARCA2	-1.12028036525791	-0.967786890429634	1.15876224833863	0.334601376394728	0.59470363095419	10
ENSG00000080546	SESN1	1.14678691581088	-0.072075962608412	-1.50218550163264	0.621018687519168	-0.193544139089006	6
ENSG00000080561	MID2	-0.451729637627975	-0.963442362385879	0.11563636327434	1.65225246781819	-0.352716831078681	3
ENSG00000080573	COL5A3	-0.559913055107876	-0.901990263415522	0.880876412212238	-0.691365243248079	1.27239214955924	2
ENSG00000080603	SRCAP	0.964813357982222	0.702657449285132	0.204113593598436	-0.310359850234479	-1.56122455063131	8
ENSG00000080608	KIAA0020	1.2047911538159	0.379143347440223	0.490694632237475	-0.960164210616973	-1.11446492287662	8
ENSG00000080644	CHRNA3	1.75781131577752	-0.395575314033633	-0.229896031599657	-0.393441209656288	-0.738898760487943	6
ENSG00000080709	KCNN2	1.03948839578873	-0.726833757631559	-0.549403336249123	1.13358554995	-0.896836851858047	7
ENSG00000080802	CNOT4	0.0650337208770708	0.510288775796027	0.771263570185295	0.38356113532398	-1.73014720218237	5
ENSG00000080815	PSEN1	0.755954401049413	-0.701644546526106	1.29566360350236	-0.258892069267857	-1.09108138875781	7
ENSG00000080819	CPOX	0.589579312024792	1.40610045416899	-0.227979608001325	-1.05837962002966	-0.709320538162796	9
ENSG00000080822	CLDND1	0.714876696520169	0.59608735873422	0.39767353770603	0.0162458808698605	-1.72488347383028	8
ENSG00000080823	MOK	-1.36661848319511	-0.271137405043689	0.872817043368176	-0.326213553085366	1.09115239795599	10
ENSG00000080824	HSP90AA1	1.53530376661508	0.363495924603007	-0.19298101611466	-0.7565695527582	-0.949249122345222	9
ENSG00000080839	RBL1	0.743690464086491	0.238607535094071	1.09040295407988	-0.8736118599259	-1.19908909333454	8
ENSG00000080845	DLGAP4	0.730851187130202	0.345807872258015	0.596062164202875	0.055823564323516	-1.72854478791461	8
ENSG00000080854	IGSF9B	1.69683543753921	-0.740752476694969	-0.629768049530433	0.0840132943310006	-0.410328205644804	6
ENSG00000080947	CROCCP3	0.734262555193633	0.0946686201195443	1.08245979055937	-0.479528788375571	-1.43186217749698	8
ENSG00000080986	NDC80	0.75356143839911	0.739059209323972	0.697587380111258	-1.07506794412033	-1.11514008371401	8
ENSG00000081014	AP4E1	0.243233414583591	-0.795387584569186	-0.287128585960347	-0.779015265785682	1.61829802173162	2
ENSG00000081019	RSBN1	0.123060904463896	0.696451651878943	0.805307380742831	0.0625960939885063	-1.68741603107418	5
ENSG00000081026	MAGI3	0.0991681362164322	1.0348648267464	0.870452700269334	-0.726062473276936	-1.27842318995523	8
ENSG00000081041	CXCL2	-0.454082669239914	-0.391228771854869	-0.478830205249252	-0.463716692818123	1.78785833916216	2
ENSG00000081051	AFP	1.68625869224799	-0.786623528899996	0.12241632727529	-0.526431339633612	-0.495620150989667	6
ENSG00000081052	COL4A4	0.248146689829582	1.45501885793933	-0.947533014966743	-0.942632283614247	0.186999750812081	1
ENSG00000081059	TCF7	0.768213865373113	1.35871725488928	-0.593771221090236	-0.632637840626931	-0.900522058545228	9
ENSG00000081087	OSTM1	0.00609933229861873	-0.744634679058728	-0.917356907279259	0.0427873153574015	1.61310493868197	2
ENSG00000081138	CDH7	-0.547272115447516	-0.479196474390783	1.56864886974663	0.385882068768137	-0.92806234867647	4
ENSG00000081148	IMPG2	-0.934803269784508	-0.790447969211585	-0.0264225643477391	0.180690821267861	1.57098298207597	10
ENSG00000081154	PCNP	1.16817255036025	0.703849291441602	0.1102881471089	-0.705647423573626	-1.27666256533712	8
ENSG00000081177	EXD2	1.15160438959851	0.346829692011829	0.462198294891106	-0.523233278428368	-1.43739909807307	8
ENSG00000081181	ARG2	1.14885955110664	1.01569745217949	-0.833746789171671	-0.481260060942226	-0.849550153172231	9
ENSG00000081189	MEF2C	-1.05692089198939	-0.978185046891063	0.0969847080705245	1.10782166155531	0.830299569254619	10
ENSG00000081248	CACNA1S	-1.00069389854504	-1.015025614203	0.0418308683057425	1.08303467567611	0.890853968766195	10
ENSG00000081277	PKP1	-0.374914176939333	-0.51261864794402	1.78409174461184	-0.371568377726535	-0.524990542001952	4
ENSG00000081307	UBA5	0.126304779773086	1.44562340582195	0.266837746972208	-0.662004246735874	-1.17676168583137	8
ENSG00000081320	STK17B	-0.958406602472405	-0.508734597926054	0.413387131314781	-0.496977973215228	1.55073204229891	2
ENSG00000081377	CDC14B	0.191405919948177	0.314504412743318	0.349247513047091	0.871811213356171	-1.72696905909476	5
ENSG00000081386	ZNF510	0.1503072838061	0.118501446757148	0.716501147885867	0.724837043160713	-1.71014692160983	5
ENSG00000081479	LRP2	1.37135838287671	0.73699218883736	-0.453140426263123	-0.804998208826623	-0.850211936624327	9
ENSG00000081665	ZNF506	-0.674863204103983	1.5651000260757	-0.662839185418979	0.447465567551246	-0.674863204103983	1
ENSG00000081692	JMJD4	-1.49536034135746	-0.41297004057852	0.381879715642766	1.13905458929026	0.387396077002954	10
ENSG00000081721	DUSP12	0.0290327036925621	1.38180567137512	0.289305123172467	-0.320530071310914	-1.37961342692924	8
ENSG00000081760	AACS	0.967695119481541	1.12514092262288	-0.242221509634368	-0.81005596180266	-1.04055857066739	9
ENSG00000081791	KIAA0141	0.473865909736598	1.20926281842135	0.041247868970796	-0.220045080693208	-1.50433151643554	8
ENSG00000081803	CADPS2	0.521148715001403	-0.955069982344607	0.452139483567407	1.13361773618947	-1.15183595241367	7
ENSG00000081818	PCDHB4	-0.0624564284231745	-0.530893347585678	1.41442327738503	0.419094912490879	-1.24016841386706	7
ENSG00000081842	PCDHA6	-0.904913687008859	0.0469407173126105	1.68284793721194	-0.470494577754699	-0.354380389760993	4
ENSG00000081853	PCDHGA2	-0.718773107819699	-0.0364344369792391	1.71262921949928	-0.69156146126457	-0.265860213435773	4
ENSG00000081870	HSPB11	0.215461024766816	0.418779553214722	1.33598185718308	-1.14707492938274	-0.823147505781881	8
ENSG00000081913	PHLPP1	0.976159246416048	0.86880853041604	0.00338576347839461	-0.383775070153617	-1.46457847015687	8
ENSG00000081923	ATP8B1	-0.0696001100579517	-0.585631993211662	-0.529889341156596	-0.562677751071969	1.74779919549818	2
ENSG00000081985	IL12RB2	1.7629204658007	-0.147237230586441	-0.531172264734806	-0.552419928697901	-0.532091041781553	6
ENSG00000082014	SMARCD3	-1.22165939372353	-0.91993939158737	0.60829380850226	1.00720020520667	0.526104771601976	10
ENSG00000082068	WDR70	0.268022945673703	0.640223644683826	1.03651195164461	-0.446604858285461	-1.49815368371668	8
ENSG00000082126	MPP4	-0.534787159816163	-0.518785160528276	-0.40720827499785	-0.321300269420812	1.7820808647631	2
ENSG00000082146	STRADB	0.224979261659667	0.183539554842225	-0.493394357760615	-1.31193618855056	1.39681172980928	2
ENSG00000082153	BZW1	1.38110859653675	-0.658559235345797	0.436116641612468	-1.21075504726149	0.052089044458068	6
ENSG00000082196	C1QTNF3	-0.800582675592476	-0.526408563961702	1.72792703571631	-0.289503863419654	-0.111431932742474	4
ENSG00000082212	ME2	1.20425787048223	0.671651044192681	0.158941449621837	-0.978198473968447	-1.05665189032831	8
ENSG00000082213	C5orf22	1.74064890652719	-0.158420575666969	-0.38395956130322	-0.399515574734144	-0.798753194822863	6
ENSG00000082258	CCNT2	0.118552226087397	0.643645251902132	0.600433440965502	0.387039428122522	-1.74967034707755	5
ENSG00000082269	FAM135A	1.20894591720486	0.567723622711751	0.00650031533731785	-0.332009178936009	-1.45116067631792	8
ENSG00000082293	COL19A1	-0.922176133554221	-0.912919791816327	0.44949921624413	1.4524627432369	-0.0668660341104859	3
ENSG00000082397	EPB41L3	-0.948930918571439	0.135224071058335	0.685317005063097	1.20510315354142	-1.07671331109142	3
ENSG00000082438	COBLL1	0.129201922988448	-1.30883651821887	-0.520479007222693	0.323671816595444	1.37644178585767	2
ENSG00000082458	DLG3	1.18440341171084	0.743986978520224	0.0679025945614214	-0.845718917453196	-1.15057406733929	8
ENSG00000082482	KCNK2	-0.747240856528316	-0.799485781367548	0.208636113437645	-0.296273709425636	1.63436423388385	2
ENSG00000082497	SERTAD4	-0.432351440808914	-0.987994560761739	1.27796897486732	-0.70133937285886	0.843716399562197	4
ENSG00000082512	TRAF5	-0.331803443010942	-0.168686083478392	-0.890135006025538	1.72054220541221	-0.329917672897342	3
ENSG00000082515	MRPL22	0.964140719483059	0.835744675467797	0.230266793543151	-0.655783901157748	-1.37436828733626	8
ENSG00000082516	GEMIN5	0.710343828932792	1.04759775039716	0.341282247546997	-0.851992724206742	-1.24723110267021	8
ENSG00000082556	OPRK1	-0.0420562832634831	-0.778580643578527	-0.0684658697465702	1.66768344016711	-0.778580643578527	3
ENSG00000082641	NFE2L1	0.144086584054631	-0.78247464575188	-0.734208409379661	-0.284757880358238	1.65735435143514	2
ENSG00000082684	SEMA5B	1.72233541178966	-0.22578307508125	-0.105653714592209	-0.650059133746911	-0.740839488369292	6
ENSG00000082701	GSK3B	-0.818692264428855	0.43441562668679	1.56377154692596	-0.585249228047201	-0.594245681136698	4
ENSG00000082781	ITGB5	0.599951960834642	0.122442924869059	-0.856730290995099	-1.13326046737828	1.26759587266968	2
ENSG00000082805	ERC1	0.485745486109015	0.766189872210765	0.769339703156258	-0.489895566555506	-1.53137949492053	8
ENSG00000082898	XPO1	1.09678756008418	0.537090308349512	0.419711593571445	-0.692266415523861	-1.36132304648128	8
ENSG00000082996	RNF13	1.42130492727929	0.296376557636187	-0.111486598366211	-1.34609512806324	-0.26009975848602	9
ENSG00000083067	TRPM3	1.20801282165207	-0.57744673747441	0.943123780543696	-0.587435896063449	-0.986253968657904	7
ENSG00000083093	PALB2	1.17428872299784	0.592312240398265	0.191185168770602	-0.580648689786257	-1.37713744238045	8
ENSG00000083097	DOPEY1	-0.446478972816825	-1.1694846505453	0.433267213927529	1.47051152909511	-0.287815119660515	3
ENSG00000083099	LYRM2	-1.60844736719869	-0.0819359713999105	1.0727649386845	0.48857669690151	0.129041703012597	4
ENSG00000083123	BCKDHB	0.863384122626588	1.11551357609451	-0.0587501052583125	-1.24578549857159	-0.674362094891195	9
ENSG00000083168	KAT6A	-0.320659033586315	0.228707714091683	1.05477302309466	0.583674031902827	-1.54649573550285	5
ENSG00000083223	ZCCHC6	-0.0901242993097528	-1.073275634788	0.980619481348902	1.05617986880686	-0.873399416058008	3
ENSG00000083290	ULK2	-0.998554024260205	0.129014748324215	1.24521428145773	0.638334571844486	-1.01400957736622	5
ENSG00000083307	GRHL2	1.78824841762462	-0.405353922136127	-0.448495904060517	-0.458343368841857	-0.476055222586123	6
ENSG00000083312	TNPO1	-0.190478200270813	0.14642897323419	1.60539581059853	-0.510414780969852	-1.05093180259205	4
ENSG00000083444	PLOD1	-0.793626996952209	-0.271627411430723	0.813063329443644	-1.01484762108521	1.2670387000245	2
ENSG00000083454	P2RX5	-0.314490702153631	-0.449929031384679	-0.711330066714638	-0.287734739232137	1.76348453948509	2
ENSG00000083457	ITGAE	0.426851006365406	-1.27989445235171	1.05638807812784	-0.823835080924767	0.620490448783225	2
ENSG00000083520	DIS3	0.808334064137339	1.30721978382695	-0.461636059832514	-0.65822448613493	-0.995693301996837	9
ENSG00000083535	PIBF1	-1.28015513401256	0.637439665939373	0.78090392843578	0.748069931543036	-0.88625839190563	5
ENSG00000083544	TDRD3	-0.242722096877798	0.861047802810878	0.359053579020552	0.649978012949054	-1.62735729790269	5
ENSG00000083635	NUFIP1	0.84251020335545	0.917928630498214	0.218250315488219	-0.51905476429798	-1.4596343850439	8
ENSG00000083642	PDS5B	-0.362092117182383	-0.617808595431007	1.27791326804474	0.802238637078561	-1.10025119250991	4
ENSG00000083720	OXCT1	1.12720437904126	-0.352185485285099	-0.17294861267562	-1.39516039331485	0.793090112234312	2
ENSG00000083750	RRAGB	-1.6257341421515	-0.303525735394886	0.536396987074344	0.636826984721673	0.756035905750372	10
ENSG00000083782	EPYC	-0.616155793021252	-0.616155793021252	1.68339121285877	0.165076166204985	-0.616155793021252	4
ENSG00000083799	CYLD	-0.413842352264164	-1.33566097992426	-0.0934213340636311	0.510468996329743	1.33245566992231	10
ENSG00000083807	SLC27A5	0.245531120713672	1.16876844861379	0.626665053685585	-0.798877486897647	-1.2420871361154	8
ENSG00000083812	ZNF324	-1.25901841946089	0.469831691927354	0.895350477449923	0.779637451210871	-0.885801201127257	5
ENSG00000083814	ZNF671	1.3150720485199	0.843542539805671	-0.733695771608704	-0.764972208447869	-0.659946608269002	9
ENSG00000083817	ZNF416	0.499398955279447	-0.154498373736883	0.173600148895813	1.07532305362094	-1.59382378405931	7
ENSG00000083828	ZNF586	0.520975101833789	0.914956694603818	0.322445718358175	-0.0913048171148973	-1.66707269768089	8
ENSG00000083838	ZNF446	-1.1581684421761	1.3013700025836	0.551913588167594	0.11008903185611	-0.805204180431211	5
ENSG00000083844	ZNF264	-0.352704458534581	0.42999321243808	0.551895166086676	0.947980993392173	-1.57716491338235	5
ENSG00000083845	RPS5	-0.427404108129561	0.674760498342006	0.881650905737394	0.422255426341014	-1.55126272229085	5
ENSG00000083857	FAT1	0.100340071877472	-1.67769899122817	0.954442128090081	0.498922424869605	0.123994366391012	10
ENSG00000083896	YTHDC1	0.949765104676454	-0.136104965387853	0.46040957094167	0.376823591133126	-1.6508933013634	7
ENSG00000083937	CHMP2B	1.65861452402095	-0.156954950077942	-0.981835614217908	-0.00965875165761309	-0.510165208067488	6
ENSG00000084070	SMAP2	-1.63071285129405	0.276220026788768	1.09519836247349	0.00434393648530892	0.254950525546486	4
ENSG00000084072	PPIE	0.23582159902123	1.49018439542981	0.0212558788302763	-0.559923428158268	-1.18733844512305	1
ENSG00000084073	ZMPSTE24	1.1742341994666	-0.673443226116449	-0.0728938498019194	-1.23149138114132	0.803594257593097	6
ENSG00000084090	STARD7	1.5680697921202	0.412907063148591	-0.849811700791591	-0.631603990765164	-0.499561163712041	9
ENSG00000084092	NOA1	0.21519684835552	1.5508998189491	-0.0360921582539043	-0.705880251825909	-1.02412425722481	1
ENSG00000084093	REST	0.996072994507265	-0.84198262164853	0.684177552885119	0.44094114225491	-1.27920906799876	7
ENSG00000084110	HAL	-0.465982102312227	0.778144461526971	1.28046892665904	-0.429223012386906	-1.16340827348688	5
ENSG00000084112	SSH1	-0.816470162502883	-0.621894753625547	0.456088389574001	-0.570975944974755	1.55325247152918	2
ENSG00000084207	GSTP1	1.33279380547438	0.38207860453991	-0.00105804474820981	-1.40876570312859	-0.305048662137501	9
ENSG00000084234	APLP2	1.28234872034067	0.74354340327409	-0.295292361905833	-1.19548136146386	-0.535118400245068	9
ENSG00000084444	KIAA1467	0.959067019154805	0.830698478665789	-1.43252175868777	-0.548892281983584	0.191648542850759	9
ENSG00000084453	SLCO1A2	1.0654350454473	1.10490867827286	-0.525677777887405	-0.735083864742133	-0.909582081090625	9
ENSG00000084463	WBP11	0.864895248474502	0.652104992080069	0.550707282955404	-0.594690024875172	-1.4730174986348	8
ENSG00000084623	EIF3I	0.640815955895588	1.2193136644913	0.044467241643034	-1.33105109387554	-0.573545768154381	9
ENSG00000084628	NKAIN1	1.372960128325	-0.238095425746869	0.663372330104596	-0.872661068769773	-0.925575963912958	6
ENSG00000084636	COL16A1	-0.714640578109674	-1.39629612774867	0.514191864406039	0.813466293316183	0.783278548136118	10
ENSG00000084652	TXLNA	0.793814142404895	0.893553211630137	0.409100754771308	-1.36953537102667	-0.726932737779666	9
ENSG00000084676	NCOA1	-0.769765421928103	-1.13233176010257	0.627225033662947	1.31538343204858	-0.0405112836808486	3
ENSG00000084693	AGBL5	0.507219988014522	1.24014446198007	0.306443229621007	-0.996910909189363	-1.05689677042623	8
ENSG00000084710	EFR3B	0.945495486843905	0.122303572729291	0.988441394041274	-1.02893553683377	-1.0273049167807	8
ENSG00000084731	KIF3C	1.37806270957576	0.24097298454813	0.237582768493506	-1.29087892077801	-0.565739541839383	9
ENSG00000084733	RAB10	1.41608965144306	0.335752147239846	-0.0228183632655386	-1.30421553670867	-0.424807898708694	9
ENSG00000084754	HADHA	-0.666910099989576	1.72560046001298	-0.120399588678521	-0.221311646862095	-0.71697912448279	1
ENSG00000084764	MAPRE3	-0.642186911901324	-0.532733180590334	-0.590017087139914	0.0463556963197117	1.71858148331186	2
ENSG00000084774	CAD	1.07557113736591	0.675947725894889	0.326519042915647	-0.793554143814793	-1.28448376236165	8
ENSG00000085063	CD59	-0.521408437070798	-0.73090300920271	-0.47848229302899	0.00890832794646873	1.72188541135603	2
ENSG00000085117	CD82	-1.21740789109192	-0.846795382740829	0.669406287253935	0.261496261030735	1.13330072554807	10
ENSG00000085185	BCORL1	-0.557168352568606	1.02590779797039	0.949496276233327	-0.105032950677579	-1.31320277095753	5
ENSG00000085224	ATRX	0.217440789384402	0.457474858226401	1.23174324346553	-0.50135003454723	-1.4053088565291	8
ENSG00000085231	TAF9	1.20327104873606	0.955657957975403	-0.62648435882275	-0.956196926669275	-0.576247721219437	9
ENSG00000085274	MYNN	0.325429037271119	0.433191830129411	0.86629791644643	0.0919155781307467	-1.7168343619777	5
ENSG00000085276	MECOM	-1.28938477950255	1.22767971271615	0.118380628403248	-0.666565553844397	0.609889992227552	1
ENSG00000085365	SCAMP1	0.323350454439461	1.55330513072411	-0.847471875248449	-0.857279410002597	-0.171904299912529	1
ENSG00000085377	PREP	1.05732768790763	0.760986341471151	0.0539062370867107	-1.45929638257391	-0.412923883891584	9
ENSG00000085382	HACE1	0.791546758574852	0.964945250223877	0.0376396806795894	-0.252293253858003	-1.54183843562032	8
ENSG00000085415	SEH1L	0.977084314656573	0.548430816340611	0.622070157774802	-0.913328763292511	-1.23425652547948	8
ENSG00000085433	WDR47	-1.50231926539945	-0.334653852665098	0.655116559066653	0.0891945579296369	1.09266200106825	10
ENSG00000085449	WDFY1	1.48221127668138	0.524347436146327	-0.328834727947004	-0.918229285639006	-0.759494699241695	9
ENSG00000085465	OVGP1	-0.495760444295519	1.6886245458768	-0.459091524184007	0.0928922447751145	-0.826664822172392	1
ENSG00000085491	SLC25A24	-1.52834218151155	-0.30341515069429	1.10105042709267	0.149910781585053	0.580796123528118	4
ENSG00000085511	MAP3K4	1.11842362300805	0.72304710680803	0.169168568306781	-0.708353082969265	-1.30228621515359	8
ENSG00000085514	PILRA	0.131838608853703	0.685363417216367	0.17450344545034	0.726993175211661	-1.71869864673207	5
ENSG00000085552	IGSF9	0.749337787531984	1.08239066661686	0.262177153396023	-0.992335413773412	-1.10157019377146	8
ENSG00000085644	ZNF213	-0.602428188307412	0.859320163175051	0.810348041525386	0.380842828772311	-1.44808284516533	5
ENSG00000085662	AKR1B1	0.327405963272953	-0.568561180690231	1.56691922205547	-1.00601650406832	-0.319747500569866	4
ENSG00000085719	CPNE3	0.470983001379504	1.0310110399533	0.611819191966867	-1.28795350757307	-0.825859725726597	8
ENSG00000085721	RRN3	0.0651347788712503	-1.14770934947795	-0.788294743280385	1.3272484600418	0.54362085384529	10
ENSG00000085733	CTTN	0.979356768211915	-0.224001204968131	-0.912568762109962	-0.957140483643315	1.11435368250949	2
ENSG00000085741	WNT11	-1.56590166417049	0.784907840453591	0.0908001372680016	0.93052119051781	-0.24032750406891	3
ENSG00000085760	MTIF2	0.836863183182162	1.15433827784579	-0.0660599118371459	-0.728354796519701	-1.19678675267111	8
ENSG00000085788	DDHD2	-1.01360652208848	1.57325080296676	0.318209132161503	-0.365057328018559	-0.512796085021228	1
ENSG00000085831	TTC39A	1.78838569247154	-0.466605166653127	-0.421966664828964	-0.426799843114065	-0.473014017875387	6
ENSG00000085832	EPS15	1.3190346468744	0.272528530778271	-1.44734742082914	0.128718105238122	-0.272933862061663	6
ENSG00000085840	ORC1	0.922763833067325	0.900664316503442	0.29697661783718	-1.0831958283687	-1.03720893903924	8
ENSG00000085871	MGST2	-0.758610203066989	0.66456996290983	-0.745273287320531	-0.598970119055738	1.43828364653343	2
ENSG00000085872	CHERP	0.851463832008206	0.699785786884702	0.317315558911061	-0.24913584568626	-1.61942933211771	8
ENSG00000085978	ATG16L1	1.6696199814291	-0.428735123179065	-0.902615447060123	-0.448980707192626	0.110711296002714	6
ENSG00000085982	USP40	-1.60652181710609	0.183600684250259	1.13086886784226	0.324725294368832	-0.0326730293552607	4
ENSG00000085998	POMGNT1	-0.131343189724238	-1.02803760135889	0.390756052452483	-0.728747685165017	1.49737242379567	2
ENSG00000085999	RAD54L	0.96651914243501	0.802640524183444	0.368533599932573	-1.04733302087361	-1.09036024567742	8
ENSG00000086015	MAST2	-1.10250522534407	-0.724577496591762	1.40949317626009	-0.0958428407862887	0.513432386462032	4
ENSG00000086061	DNAJA1	1.20441068235129	-0.616696422130045	0.897300224486138	-0.381052730407951	-1.10396175429943	7
ENSG00000086062	B4GALT1	-1.27260620085904	-0.00372939565103286	0.320523580375503	-0.476278428630579	1.43209044476515	2
ENSG00000086065	CHMP5	-1.09496713001209	-0.86995138678801	0.00278577253205855	1.22523983017737	0.736892914090669	10
ENSG00000086102	NFX1	0.23167860113342	-0.686286926161772	0.842168316859561	0.966173975843642	-1.35373396767486	7
ENSG00000086189	DIMT1	0.341363995781159	1.40455731670125	0.159143358567721	-0.764480404575923	-1.14058426647421	8
ENSG00000086200	IPO11	1.20529873429628	0.758326572430892	-0.0036106748272939	-0.819766785737529	-1.14024784616234	9
ENSG00000086232	EIF2AK1	1.07500275766332	0.561735109423445	0.472911918874488	-0.854992531811853	-1.2546572541494	8
ENSG00000086289	EPDR1	-0.464740257818169	-0.780848191512431	-0.163375371077783	-0.333547848302319	1.7425116687107	2
ENSG00000086300	SNX10	1.166033616326	0.96482625725236	-0.351585322605498	-0.851200990724024	-0.928073560248835	9
ENSG00000086475	SEPHS1	1.54240731012698	-0.151279814609369	0.324854875648928	-0.757329206543148	-0.958653164623394	6
ENSG00000086504	MRPL28	1.43245624865324	0.216872659764713	-0.232408871290016	-1.35776359389651	-0.0591564432314289	9
ENSG00000086506	HBQ1	0.869869774732225	1.26563634578156	-0.474190147284575	-0.96602699711738	-0.695288976111825	9
ENSG00000086544	ITPKC	-1.13956086684939	0.00683448962206466	-0.667723235890678	1.4635588975123	0.336890715605701	3
ENSG00000086570	FAT2	1.71405435802131	0.0518546237555705	-0.474755113088326	-0.659669166692538	-0.631484701996014	6
ENSG00000086589	RBM22	-0.16754964786686	0.619057345024642	0.717278563684559	0.509036318464864	-1.67782257930721	5
ENSG00000086598	TMED2	0.47113630224193	-0.223728903144969	-0.640519495721774	-1.07632300681249	1.4694351034373	2
ENSG00000086619	ERO1LB	0.580253229289648	-1.33102206536015	0.586873565585796	0.957685906530163	-0.793790636045458	7
ENSG00000086666	ZFAND6	1.19532720440869	-1.25163860572167	-0.778545979914334	0.575489452240287	0.259367928987038	6
ENSG00000086696	HSD17B2	-0.778890651384374	-1.03683522377305	-0.205988982700871	0.670119165967035	1.35159569189126	10
ENSG00000086712	TXLNG	1.33912003524538	0.490236979629244	0.0635920827731938	-0.654281856517845	-1.23866724112997	8
ENSG00000086717	PPEF1	-0.660024268995353	-0.566717157934827	-0.348270246662352	1.75744825172428	-0.182436578131753	3
ENSG00000086730	LAT2	-0.134002499880591	-1.50102081504605	0.0984231407691496	0.249299759248905	1.28730041490859	10
ENSG00000086758	HUWE1	1.15005213361209	0.593263508268028	0.307041898970245	-0.771052080221689	-1.27930546062867	8
ENSG00000086827	ZW10	0.810983974129921	0.89993061865772	0.361725492999036	-0.680183776545416	-1.39245630924126	8
ENSG00000086848	ALG9	-1.07333037041798	0.651970267464375	1.11919411807653	0.331823418743764	-1.02965743386669	5
ENSG00000086967	MYBPC2	-0.655161958812199	-0.973444842824592	-0.525550293151806	1.19276873833025	0.961388356458349	10
ENSG00000086991	NOX4	-0.0728098673246465	-0.511876345911025	1.70825388030419	-0.864560862799799	-0.259006804268717	4
ENSG00000087008	ACOX3	-1.68382085164986	-0.149394103957049	0.608012861836975	0.507270576925659	0.717931516844277	10
ENSG00000087053	MTMR2	0.905537099626563	1.10574832199406	-0.0376511661720336	-0.922437347695672	-1.05119690775292	9
ENSG00000087074	PPP1R15A	-1.46694704716623	-0.126984906213967	0.980185285550001	0.891182975397694	-0.277436307567497	3
ENSG00000087076	HSD17B14	0.852489697386143	1.00267979271609	-0.102256657723423	-1.47690892310456	-0.27600390927425	9
ENSG00000087077	TRIP6	1.37422514312871	0.0916812789484459	0.468026776625381	-1.05063835959029	-0.883294839112244	8
ENSG00000087085	ACHE	-0.509726910429936	-0.865858632217717	-0.332081929445214	1.69707889621978	0.0105885758730883	3
ENSG00000087086	FTL	0.823343639262601	0.509258791735462	-0.49971981462724	-1.52689034242078	0.694007726049954	9
ENSG00000087087	SRRT	1.17055615538254	0.278901904901604	0.613956191524248	-0.879669922982754	-1.18374432882564	8
ENSG00000087088	BAX	1.43607135251585	0.331832552318161	-1.07732654799553	-0.808162956058616	0.117585599220131	9
ENSG00000087095	NLK	1.61648477747497	0.295218337657054	-0.565699722878363	-0.480720190439372	-0.865283201814288	6
ENSG00000087111	PIGS	-0.890790320375004	0.101745450350261	-0.709181786406645	-0.137131588629393	1.63535824506078	2
ENSG00000087116	ADAMTS2	-0.138520596616798	-0.246574143580326	0.0583476151411232	-1.2264514174554	1.5531985425114	2
ENSG00000087128	TMPRSS11E	1.71889581996232	0.0499215783033421	-0.589605799421887	-0.589605799421887	-0.589605799421887	6
ENSG00000087152	ATXN7L3	1.03791209349899	-0.483230097527697	0.742888726042297	0.156043381775711	-1.4536141037893	7
ENSG00000087157	PGS1	1.15953294283822	-0.485344289602605	0.80013300168676	-0.148561097785637	-1.32576055713675	7
ENSG00000087191	PSMC5	1.44850371871206	0.417229261791814	-0.252777484859577	-1.23253381670597	-0.380421678938335	9
ENSG00000087206	UIMC1	0.719934015425992	0.942499799338957	0.220355053527069	-0.319950216705076	-1.56283865158694	8
ENSG00000087245	MMP2	-0.439911763952246	0.729116735002247	0.0727785694880979	-1.44670375660107	1.08472021606297	2
ENSG00000087250	MT3	-0.556367771491681	-0.556367771491681	-0.2874716197081	-0.376460356450564	1.77666751914202	2
ENSG00000087253	LPCAT2	-0.346591941533935	0.350689882519904	-0.521086079679248	-1.0360563472366	1.55304448592987	2
ENSG00000087258	GNAO1	1.77352599267341	-0.283547454687416	-0.367957763339767	-0.492643109765794	-0.629377664880437	6
ENSG00000087263	OGFOD1	1.3593282004523	0.383405185115495	0.124481159057927	-1.28466757389249	-0.582546970733232	9
ENSG00000087266	SH3BP2	0.555336536592424	0.779143480984699	0.84316286328344	-1.05312203663344	-1.12452084422712	8
ENSG00000087269	NOP14	0.378208581747394	1.24722826354776	0.431357970720462	-1.02105674040066	-1.03573807561496	8
ENSG00000087274	ADD1	-0.71862128540619	-0.918368680588374	1.19883831756375	-0.524893486141247	0.963045134572063	4
ENSG00000087299	L2HGDH	1.32394891010175	0.611593682952891	-0.230192908760256	-0.424881140517828	-1.28046854377656	9
ENSG00000087301	TXNDC16	0.847708353083128	0.962661452735445	0.138544375515995	-0.507367330321503	-1.44154685101307	8
ENSG00000087302	C14orf166	1.43208173501568	0.488529442838299	-0.104309336841167	-1.06646115569206	-0.749840685320753	9
ENSG00000087303	NID2	-0.544890570522371	1.22005879362799	-0.139880345107818	-1.280490852193	0.745202974195203	1
ENSG00000087338	GMCL1	1.07770482864593	0.502626702031449	0.506292170824691	-0.767098434490367	-1.3195252670117	8
ENSG00000087365	SF3B2	0.768802043037004	0.913346907677884	0.326052100745287	-0.528708508067774	-1.4794925433924	8
ENSG00000087448	KLHL42	0.847854948944258	-0.180659592440429	1.21497772375078	-0.963950004232722	-0.918223076021887	8
ENSG00000087460	GNAS	-0.991635174250584	1.56440279611557	0.308863273335467	-0.234332357017318	-0.64729853818313	1
ENSG00000087470	DNM1L	0.462724185799496	1.02507672314963	0.614136541507525	-0.778141100983578	-1.32379634947308	8
ENSG00000087494	PTHLH	-0.454060073504918	-0.614327402093643	-0.309211031214331	-0.400221179798184	1.77781968661108	2
ENSG00000087495	PHACTR3	-0.548117735268715	-0.57761420455613	1.75820725205709	-0.123075124162985	-0.509400188069262	4
ENSG00000087502	ERGIC2	-0.622802532102184	-1.35581910733899	1.02146229871865	0.109520512019511	0.847638828703012	10
ENSG00000087510	TFAP2C	1.78326630058748	-0.31210567441624	-0.507656917797139	-0.463502128523409	-0.500001579850696	6
ENSG00000087586	AURKA	1.12313583677867	0.7406269967272	0.18192072593301	-0.843214692871376	-1.20246886656751	8
ENSG00000087589	CASS4	-1.02212981488902	-1.00547705196859	0.334455524739034	1.29324406472067	0.399907277397903	10
ENSG00000087842	PIR	0.796334504934576	1.22905993196562	-0.404328680296039	-1.24519036676859	-0.375875389835569	9
ENSG00000087884	AAMDC	-0.693222847922186	0.449763817446737	0.371677870467029	-1.32323413915095	1.19501529915936	2
ENSG00000087903	RFX2	-0.097944898081078	0.567489837269365	1.37942799135424	-0.756870760063205	-1.09210217047932	8
ENSG00000087995	METTL2A	1.00305159203028	0.474469002834805	0.46616344703675	-0.396296852285005	-1.54738718961683	8
ENSG00000088002	SULT2B1	1.74279567640294	-0.416593053622563	-0.302839416584961	-0.216922701747949	-0.806440504447469	6
ENSG00000088035	ALG6	1.46631448444805	0.311937742358576	0.0608053905946784	-0.749451000030836	-1.08960661737046	9
ENSG00000088038	CNOT3	0.942317600426483	0.562111401063658	0.293384744250805	-0.159337210034689	-1.63847653570626	8
ENSG00000088179	PTPN4	1.33932405178595	0.585578410187913	-0.139945506365237	-0.538438509446323	-1.2465184461623	9
ENSG00000088205	DDX18	1.16120618290582	0.853113724680282	-0.167139379067953	-0.615512636833839	-1.23166789168431	9
ENSG00000088247	KHSRP	0.869906625709648	0.805188954024979	0.383565822259182	-0.623888296438812	-1.434773105555	8
ENSG00000088256	GNA11	-0.53518261482733	-1.45446311554116	0.939265657101237	0.238617628201988	0.811762445065261	10
ENSG00000088280	ASAP3	0.145640388499654	-1.69891411395219	0.256599090196802	0.343415964895655	0.953258670360082	10
ENSG00000088298	EDEM2	1.00593220872748	-0.473713861306491	-0.696123663982821	-0.982395719153668	1.1463010357155	2
ENSG00000088305	DNMT3B	1.6098524273057	0.330651101433145	-0.505972578279401	-0.633309422632984	-0.80122152782646	6
ENSG00000088325	TPX2	0.816702313055603	0.8434630808583	0.492252975748854	-0.899005979563799	-1.25341239009896	8
ENSG00000088340	FER1L4	-0.158051942937726	1.72636385784162	-0.223985321872532	-0.815186013053698	-0.529140579977661	1
ENSG00000088356	PDRG1	0.708458707364296	-0.531627810341229	-0.0655835683074881	1.21026909230179	-1.32151642101737	7
ENSG00000088367	EPB41L1	1.15257990942111	0.190716601873053	0.408245574276128	-1.5593544109601	-0.192187674610187	9
ENSG00000088386	SLC15A1	1.78834367622139	-0.411041710340705	-0.468686869407566	-0.43992822706555	-0.468686869407566	6
ENSG00000088387	DOCK9	-0.899471783528903	-1.14366667221324	1.12395781327057	0.773635987297947	0.145544655173627	10
ENSG00000088448	ANKRD10	1.18614437014002	-0.483143233809377	0.937346884299408	-1.08060073024892	-0.559747290381149	6
ENSG00000088451	TGDS	1.01262745033465	0.860326658477148	-0.00635106837754984	-0.437176588272786	-1.42942645216147	8
ENSG00000088538	DOCK3	1.72008552230901	-0.0222033275631782	-0.655220827502433	-0.705622723634503	-0.337038643608894	6
ENSG00000088543	C3orf18	0.230586049666457	0.0545238761923086	-0.107190614474104	1.3104223064808	-1.48834161786546	3
ENSG00000088682	COQ9	-0.126029541980899	-1.56186495909642	0.5652727144961	0.0158655135835101	1.1067562729977	10
ENSG00000088726	TMEM40	0.0309723696208862	-0.684193321596152	-0.684193321596152	-0.372556816328543	1.70997108989996	2
ENSG00000088727	KIF9	-0.849344992045594	-1.0084730282577	1.47985761204074	0.198717984728169	0.179242423534386	4
ENSG00000088756	ARHGAP28	-1.40549893139277	0.827475246750551	0.980655731864346	0.184115891715993	-0.586747938938121	5
ENSG00000088766	CRLS1	0.205934609006577	1.43244412399081	0.103597192826149	-1.30556955882999	-0.436406366993549	1
ENSG00000088808	PPP1R13B	1.38306569876308	-0.371230512114359	0.0658736252452806	0.287054094935629	-1.36476290682963	7
ENSG00000088812	ATRN	-0.23528705101736	-0.40866667595409	1.36498652440216	-1.27004902383205	0.549016226401337	4
ENSG00000088826	SMOX	-1.18269390840371	-0.958881956795443	1.01836647193208	0.478206344612029	0.64500304865505	10
ENSG00000088832	FKBP1A	0.254069335007809	0.432165560754145	-0.32551839123438	-1.51782998649887	1.1571134819713	2
ENSG00000088833	NSFL1C	0.0613302536882987	-1.63497330273882	-0.0002105400092598	0.992588282281681	0.581265306778107	10
ENSG00000088836	SLC4A11	1.70772623922207	-0.91973612731466	-0.396606589377921	-0.151707500483814	-0.239676022045676	6
ENSG00000088854	C20orf194	-1.04169907264373	-0.963711972775817	1.32212903711179	0.293371275705041	0.389910732602715	4
ENSG00000088876	ZNF343	-1.06739139877439	0.613797289854798	1.1294954907755	0.36195897685419	-1.03786035871009	5
ENSG00000088881	EBF4	-0.933721962126751	0.682750775787231	0.838928606293679	0.650840454018517	-1.23879787397268	5
ENSG00000088882	CPXM1	-0.141961722654507	1.09065538163145	0.422392948414974	-1.5998634507079	0.22877684331598	1
ENSG00000088888	MAVS	0.572924816448658	1.40461904551429	-0.147272399239778	-0.948048635127007	-0.882222827596164	9
ENSG00000088899	LZTS3	1.64365835296601	0.178800900861033	-0.522646785283	-0.377416264072743	-0.922396204471301	6
ENSG00000088930	XRN2	0.93429814549365	0.785702214623594	0.433991377761527	-1.04897546685125	-1.10501627102751	8
ENSG00000088970	PLK1S1	1.21587853292279	-1.25903826668931	0.250248384451723	0.549293681994408	-0.756382332679609	7
ENSG00000088986	DYNLL1	1.63451140462411	-0.706407849135155	-0.440193073659783	-0.752168856236206	0.264258374407038	6
ENSG00000088992	TESC	1.74815256025082	-0.533145551953435	-0.071377755367504	-0.590250033715298	-0.553379219214585	6
ENSG00000089006	SNX5	0.802398747600655	0.661003800796941	0.654433563832306	-0.706546067601312	-1.41129004462859	8
ENSG00000089009	RPL6	-0.462746695349697	0.136104395421031	1.02398355668405	0.763906638814141	-1.46124789556952	5
ENSG00000089022	MAPKAPK5	1.06387270410176	0.631408739373106	0.25898100967862	-0.480716157288156	-1.47354629586533	8
ENSG00000089041	P2RX7	0.233318029561892	1.61438005837228	-0.262610283999581	-0.876579280998533	-0.708508522936056	1
ENSG00000089048	ESF1	1.08422624677722	0.685814122465219	0.282595762694315	-0.73684049769434	-1.31579563424242	8
ENSG00000089050	RBBP9	0.102596488235374	0.839723136146185	1.09631422860648	-1.0663282767359	-0.972305576252146	8
ENSG00000089053	ANAPC5	0.29064070806353	0.934805862827766	0.844984113116272	-1.33879911757508	-0.731631566432488	8
ENSG00000089057	SLC23A2	0.213726939081748	-1.56574975982279	1.14555555394612	-0.187572652487084	0.394039919282001	4
ENSG00000089060	SLC8B1	1.43752486005472	-0.723297042292453	0.0697264708137059	-1.13299324442184	0.349038955845869	6
ENSG00000089063	TMEM230	0.0584106392208236	0.482599076432956	-0.024311245528339	-1.60549559635345	1.08879712622802	2
ENSG00000089091	DZANK1	0.883167671684894	0.560614331758841	0.699888423482706	-0.828708518350703	-1.31496190857574	8
ENSG00000089094	KDM2B	1.36113510571682	0.49009267347339	0.0968527557962871	-0.984788609016181	-0.963291925970317	9
ENSG00000089116	LHX5	1.78751512420077	-0.482353029791322	-0.389178272341477	-0.433988509224919	-0.481995312843052	6
ENSG00000089123	TASP1	0.218936781236342	1.01247973580252	0.833396314738431	-0.808045057968628	-1.25676777380867	8
ENSG00000089154	GCN1L1	1.31437240600731	0.424911555249835	0.198396092417455	-0.672856628780072	-1.26482342489453	8
ENSG00000089157	RPLP0	-0.268810459067509	1.24621700647821	0.399148182645904	0.1079366061284	-1.48449133618501	5
ENSG00000089159	PXN	-0.0295821573419909	-1.38261139244507	-0.377920016818444	1.30884042463207	0.481273141973436	10
ENSG00000089163	SIRT4	-0.882882252157757	-0.428379610170382	0.328472968283363	1.59732806672869	-0.614539172683911	3
ENSG00000089177	KIF16B	-0.534650182858268	-0.365246860602075	1.6084910076939	0.254984515995416	-0.963578480228976	4
ENSG00000089195	TRMT6	1.56267033061007	0.404986254576572	-0.439906768160999	-0.893335047262701	-0.634414769762934	9
ENSG00000089199	CHGB	1.76648171841216	-0.643149629404677	-0.236582244889437	-0.534936625553564	-0.351813218564481	6
ENSG00000089220	PEBP1	1.2280305513125	0.0749072004746799	0.425606980702721	-1.50116133939019	-0.22738339309971	9
ENSG00000089234	BRAP	1.20214235469936	-0.547243342385838	0.684474924618902	-0.00263701180882193	-1.33673692512361	7
ENSG00000089248	ERP29	0.815108519606955	1.24622405224272	-0.339164423130968	-1.16486001212231	-0.557308136596391	9
ENSG00000089250	NOS1	1.73901576135949	-0.495706465485407	-0.492622031539012	-0.0546746974044496	-0.69601256693062	6
ENSG00000089280	FUS	0.646828905178425	0.586293810061859	0.525546357262759	-0.0381405904853519	-1.72052848201769	8
ENSG00000089289	IGBP1	-0.39154837166287	0.988215545974202	-0.037709398970068	0.885098505907216	-1.44405628124848	5
ENSG00000089327	FXYD5	0.773786661783104	1.17440878973501	-0.958645476669322	-1.0485856366266	0.0590356617778021	9
ENSG00000089335	ZNF302	-1.09241832144044	0.0395480536965395	1.20363533455055	0.74466474912581	-0.895429815932458	5
ENSG00000089351	GRAMD1A	0.954574719671907	0.894491302030078	0.171518546337562	-0.680237133235615	-1.34034743480393	8
ENSG00000089472	HEPH	0.559016569281851	0.707473951092795	-0.102880079379232	-1.69970551655806	0.536095075562646	9
ENSG00000089486	CDIP1	1.47515931473338	0.526789991073888	-0.322840266566789	-0.966967001177724	-0.712142038062753	9
ENSG00000089505	CMTM1	0.225629733381473	-1.11883674034525	1.56891189615869	-0.399181415396799	-0.276523473798114	4
ENSG00000089597	GANAB	0.788372140691112	1.11638114430948	-0.0478745780282935	-1.37892313065654	-0.477955576315764	9
ENSG00000089639	GMIP	1.31496669639952	-0.449659409102939	-0.66717197693997	-0.994590339353947	0.796455028997337	6
ENSG00000089682	RBM41	1.39354858540747	0.319223172153719	-0.332721781570361	-0.0217637537383788	-1.35828622225245	6
ENSG00000089685	BIRC5	0.827141391970944	0.838290432443954	0.48930401185195	-0.915743986581524	-1.23899184968532	8
ENSG00000089692	LAG3	0.85542943687714	0.664133158012111	0.601211704308885	-0.731092221392414	-1.38968207780572	8
ENSG00000089693	MLF2	1.05605770333964	0.713889133335558	0.220939295854467	-1.41045900795883	-0.580427124570825	9
ENSG00000089723	OTUB2	1.07988546182961	-0.00782453784671942	0.907153303877101	-0.828029625832682	-1.15118460202731	8
ENSG00000089737	DDX24	-0.397122646178331	-1.11706102337325	0.678263121175906	1.36269458361219	-0.526774035236519	3
ENSG00000089775	ZBTB25	0.343339896887068	1.30544228740065	0.245967401068998	-0.545877475452962	-1.34887210990375	8
ENSG00000089818	NECAP1	-0.821906724266406	-0.794619529904718	0.307750258081361	1.58763277139755	-0.278856775307783	3
ENSG00000089820	ARHGAP4	1.21021553538177	0.464260628842055	0.0906388760171135	-0.268631845490486	-1.49648319475045	8
ENSG00000089847	ANKRD24	1.72987799311598	-0.458564156258461	-0.584373751319263	-0.0119545667070098	-0.674985518831248	6
ENSG00000089876	DHX32	-1.09499990747354	-0.660833902662663	1.52129113499051	0.0113423399102653	0.223200335235427	4
ENSG00000089902	RCOR1	0.152041113206815	-0.211608577480184	1.57419829997899	-0.365555454393211	-1.14907538131241	7
ENSG00000089916	GPATCH2L	0.445087866942814	0.141700746060208	0.655479435482199	0.514768578708575	-1.7570366271938	7
ENSG00000090006	LTBP4	0.0218143174027841	0.0278112969093537	1.47051117804123	-0.176570491791815	-1.34356630056155	5
ENSG00000090013	BLVRB	0.577074323766851	1.35447530352817	-1.04141919179786	-0.864387198949913	-0.0257432365472466	9
ENSG00000090020	SLC9A1	1.3466823296831	0.641803585590684	-0.111701751053276	-0.959583822475692	-0.917200341744816	9
ENSG00000090054	SPTLC1	0.93623736753069	1.00254345116344	0.0985977510635773	-0.889869671854027	-1.14750889790368	8
ENSG00000090060	PAPOLA	1.14218892151071	0.5789419812734	0.223399403180885	-0.514158014232348	-1.43037229173265	8
ENSG00000090061	CCNK	0.514121285822237	0.126498613279964	0.669607901732235	0.44328361806158	-1.75351141889602	7
ENSG00000090097	PCBP4	-1.64666191212875	0.149424138585276	0.770210828965528	0.815546747516355	-0.0885198029384058	3
ENSG00000090238	YPEL3	-0.128032298478397	-1.25966929333203	-0.339558936849733	1.49205140634175	0.235209122318415	10
ENSG00000090263	MRPS33	0.61566136876768	-0.273442952865763	-0.0889932958652822	-1.45066103781613	1.19743591777949	2
ENSG00000090266	NDUFB2	0.795517530587357	-0.8293266040251	-0.472296423470286	-0.825889776373259	1.33199527328129	2
ENSG00000090273	NUDC	1.3703758013929	0.452363935721844	0.0878838026713828	-1.16082614220141	-0.749797397584726	9
ENSG00000090316	MAEA	1.10238481059527	-0.418017408190789	1.04212232748396	-0.733616865128291	-0.992872864760154	7
ENSG00000090339	ICAM1	-0.167791890670573	0.13898420593038	-0.82100478299187	-0.782858189164209	1.63267065689627	2
ENSG00000090372	STRN4	1.12446962974479	0.344692969238296	0.330320445948794	-0.233193100658182	-1.5662899442737	8
ENSG00000090376	IRAK3	1.53748623990404	-0.241205946126191	0.38049870175652	-0.721379686879237	-0.955399308655136	6
ENSG00000090432	MUL1	-0.228796907329837	-1.03578977588968	-0.0645926359541033	-0.332220371331762	1.66139969050539	2
ENSG00000090447	TFAP4	0.737346994398151	0.588846455292821	0.831368153218899	-0.865625669474746	-1.29193593343512	8
ENSG00000090470	PDCD7	0.371324075394417	0.874326097907033	0.338353397459739	0.13769053681167	-1.72169410757286	8
ENSG00000090487	SPG21	-0.913666949905302	-0.605349320697255	1.14029677207139	1.03398213438861	-0.655262635857446	3
ENSG00000090520	DNAJB11	-0.495351039596137	-1.15002802997433	-0.392811191833322	0.702351958262272	1.33583830314152	10
ENSG00000090530	LEPREL1	1.17951254696429	-1.49137606138529	0.0398686208217531	0.551910585016287	-0.279915691417033	7
ENSG00000090534	THPO	-0.809226533620788	0.883642549133443	-0.432584105743695	1.25450421037027	-0.896336120139224	3
ENSG00000090539	CHRD	-1.32989970206088	0.27542737433553	-0.704871124466603	1.11527579061192	0.644067661580031	10
ENSG00000090554	FLT3LG	0.298191105354893	1.60145379971077	-0.434594768065965	-0.937914001609022	-0.527136135390673	1
ENSG00000090565	RAB11FIP3	1.26692056723865	-0.368771730373738	0.647282260343942	-1.3409438145851	-0.204487282623756	6
ENSG00000090581	GNPTG	-0.0337573574547681	0.513837565162023	-0.315073971093324	-1.4282271355417	1.26322089892777	2
ENSG00000090612	ZNF268	0.635692136656809	0.594947646725863	0.762253609868543	-0.415460379722074	-1.57743301352914	8
ENSG00000090615	GOLGA3	-0.858047702049951	-1.23512331085007	0.269005721831612	0.944261559857551	0.879903731210859	10
ENSG00000090621	PABPC4	-0.637748974679085	1.00318695666683	0.686498603598982	0.357866123960709	-1.40980270954744	5
ENSG00000090661	CERS4	1.16977077191843	0.752193646437937	-0.0496036896539085	-0.542154233109346	-1.33020649559311	8
ENSG00000090674	MCOLN1	0.712725809858281	-0.526781381466365	0.583824415703806	-1.52009372236656	0.750324878270832	2
ENSG00000090686	USP48	1.24063299790002	-0.713633634519015	0.341960242670006	0.419064160154979	-1.28802376620599	7
ENSG00000090776	EFNB1	-0.15118003453236	-0.882465454001859	1.71345401664091	-0.214594976556535	-0.465213551550157	4
ENSG00000090857	PDPR	1.09623982378643	-0.0301194077712496	0.819612619145775	-0.525978232419735	-1.35975480274122	8
ENSG00000090861	AARS	1.39903753896226	0.468479378470698	-1.15333830862506	-0.0121210161942664	-0.702057592613629	6
ENSG00000090863	GLG1	1.51983860960405	0.532509259636748	-0.712753299420209	-0.694801460333211	-0.644793109487367	9
ENSG00000090889	KIF4A	0.943040992458226	0.736522276217765	0.480287558677957	-1.02965272752033	-1.13019809983362	8
ENSG00000090905	TNRC6A	1.54582020972013	-0.080103747821588	0.215381918036151	-0.571673738615501	-1.10942464131919	6
ENSG00000090920	FCGBP	-0.760997077251606	-0.244940705903988	1.55930228511828	0.346357774464239	-0.899722276426927	4
ENSG00000090924	PLEKHG2	0.237678998481215	-0.400567209506711	1.6191265323014	-0.503209342521483	-0.953028978754425	4
ENSG00000090932	DLL3	-0.422223273824933	1.75009461001614	-0.118966743725017	-0.520732167000185	-0.688172425466006	1
ENSG00000090971	NAT14	-0.257516249710399	1.0078102989958	0.841755050326997	-1.48237069055216	-0.109678409060237	1
ENSG00000090975	PITPNM2	1.64086674166074	0.170076611365627	-0.881603970221064	-0.278163823060579	-0.65117555974472	6
ENSG00000090989	EXOC1	-0.963080547377756	1.67040162804955	-0.492152905323995	-0.015738820479881	-0.199429354867917	1
ENSG00000091009	RBM27	1.39559028073062	0.217224476163976	0.0815402126516806	-0.31657730215295	-1.37777766739333	8
ENSG00000091039	OSBPL8	1.10422385033561	0.700244051171582	0.289927099593074	-1.1279595700922	-0.966435431008083	8
ENSG00000091073	DTX2	1.61165568680811	-0.106127956131277	-0.0774699807250155	-0.286462074584309	-1.14159567536751	6
ENSG00000091127	PUS7	1.02886741169321	0.728543634286412	0.365679738686569	-1.16919554524365	-0.953895239422538	8
ENSG00000091129	NRCAM	1.1749555501703	-1.40541409043595	0.680966269975542	-0.0263857912238264	-0.424121938486071	7
ENSG00000091136	LAMB1	0.150029625887554	0.584583140410243	-0.256247371648277	-1.55365487702816	1.07528948237864	2
ENSG00000091137	SLC26A4	-0.421243151421282	-0.0457880480683962	-0.753475970403096	-0.509548350259127	1.7300555201519	2
ENSG00000091140	DLD	1.49915232246309	0.316219529630339	-0.53324188022631	-1.16368912808862	-0.118440843778499	9
ENSG00000091157	WDR7	-0.10673317087677	-1.24392760629887	1.13916119630971	0.854481342122602	-0.642981761256675	7
ENSG00000091164	TXNL1	-0.369430404847189	-0.200411873009049	0.750471254365012	1.18323090550391	-1.36385988201269	3
ENSG00000091262	ABCC6	-0.94842477775192	1.60943714287039	0.176267059362381	-0.165051433183935	-0.672227991296915	1
ENSG00000091317	CMTM6	1.46715958508642	0.182849697636068	-0.124883800516028	-1.32621551901459	-0.198909963191866	9
ENSG00000091409	ITGA6	0.723428615890883	-1.27417582489905	-0.745715741220778	0.170409883100044	1.1260530671289	2
ENSG00000091428	RAPGEF4	-0.45965150673934	-1.00824607554513	-0.00944893694278699	-0.178058623805485	1.65540514303274	2
ENSG00000091436	MLTK	-0.97784888283427	-0.741127034035212	0.886651519327982	-0.409067894495339	1.24139229203684	10
ENSG00000091482	SMPX	-1.05504882228864	-1.07298559224208	0.345388519071177	1.00830046271178	0.774345432747757	10
ENSG00000091483	FH	0.0149013424094772	1.29992850083252	0.634216663496222	-0.9099402689724	-1.03910623776583	8
ENSG00000091490	SEL1L3	1.51101828812896	-1.24587897582134	-0.26172199563669	-0.220917541047286	0.217500224376362	6
ENSG00000091513	TF	-0.788389257815393	-0.22887084343264	0.0127314455640858	1.68998473169056	-0.685456076006607	3
ENSG00000091527	CDV3	-0.966109666047004	-0.455888389459332	-0.485293472069672	0.319450348355315	1.58784117922069	10
ENSG00000091536	MYO15A	-0.0939282101102933	-0.548994673238228	-0.111520537523575	1.67967191527372	-0.925228494401624	3
ENSG00000091542	ALKBH5	-1.46701027167771	-0.0909521089455195	-0.302967794802511	1.02071067784873	0.840219497576997	10
ENSG00000091592	NLRP1	-1.29337160958239	-0.558059858135966	1.3611226245113	0.0986912957945526	0.391617547412509	4
ENSG00000091622	PITPNM3	-0.206951358585502	-1.16062464637722	0.0946643217621897	1.58276661374979	-0.309854930549263	3
ENSG00000091640	SPAG7	1.64365052014207	0.228105859778965	-0.474680925936669	-0.848785507109383	-0.548289946874994	6
ENSG00000091651	ORC6	0.875690630238362	0.703663066597928	0.536335344713868	-0.732038944885345	-1.38365009666481	8
ENSG00000091656	ZFHX4	-0.945907242304374	-0.701436723537897	1.46559077109047	0.564570903665173	-0.382817708913374	4
ENSG00000091664	SLC17A6	-0.523377650023387	-0.722936696776876	0.375599223486168	1.59365182009097	-0.722936696776876	3
ENSG00000091704	CPA1	-0.529151720247986	1.78646017220183	-0.447978474861041	-0.391131876453035	-0.418198100639768	1
ENSG00000091732	ZC3HC1	0.852636173761408	0.287921715799029	0.188290109761551	0.401348249151998	-1.73019624847399	7
ENSG00000091844	RGS17	1.67065400643872	0.0108973433171408	-0.393865077008915	-0.978954141326452	-0.308732131420492	6
ENSG00000091879	ANGPT2	-0.689806462073632	1.48457758909283	0.594890225044415	-0.713840019546788	-0.675821332516827	1
ENSG00000091947	TMEM101	-0.205542714536807	1.0940631625154	-0.0679304644397952	0.689586701956458	-1.51017668549526	5
ENSG00000091972	CD200	1.58293318128238	0.184362079834227	-0.0617021061492138	-0.884435256939113	-0.821157898028283	6
ENSG00000091986	CCDC80	-0.923193385849643	-0.15447831992974	0.449216226413713	-0.852943425603006	1.48139890496868	2
ENSG00000092010	PSME1	0.151951670511578	-1.74464610800527	0.567921527086642	0.305618435710307	0.719154474696749	10
ENSG00000092020	PPP2R3C	1.00039330927088	0.224933222267232	0.698729388038497	-1.5140243020538	-0.410031617522809	9
ENSG00000092036	HAUS4	0.73540191032211	1.16757823756074	-0.0574984024931114	-0.481301416542323	-1.36418032884742	8
ENSG00000092051	JPH4	1.45895424698124	0.588382261989598	-0.39228392350146	-0.797755400748949	-0.857297184720433	9
ENSG00000092054	MYH7	-0.720706420121187	-0.719956113587841	-0.587589853136133	0.484938257702431	1.54331412914273	10
ENSG00000092067	CEBPE	-0.0517685998919209	1.74426751261027	-0.564166304239451	-0.564166304239451	-0.564166304239451	1
ENSG00000092068	SLC7A8	1.31935531731074	0.821133825267024	-0.835456189597816	-0.785742297499136	-0.519290655480814	9
ENSG00000092094	OSGEP	-0.133899741234826	1.11871616917622	0.83252995882848	-0.469318601385944	-1.34802778538393	8
ENSG00000092096	SLC22A17	0.346380474030393	-0.83306439267851	0.162096121566171	1.40870284291429	-1.08411504583235	3
ENSG00000092098	RNF31	0.774811548838962	0.8876573178644	0.429452968566114	-0.700104578110144	-1.39181725715933	8
ENSG00000092108	SCFD1	1.0903964080783	1.07486614938012	-0.544438068393589	-0.961656437271168	-0.659168051793673	9
ENSG00000092140	G2E3	1.25977856329718	0.592907946521752	-0.0566767920263926	-0.426104219751111	-1.36990549804143	8
ENSG00000092148	HECTD1	0.315856212679954	-0.873290061757969	1.37508305980279	0.266627385414987	-1.08427659613975	7
ENSG00000092199	HNRNPC	0.951566344879648	0.733090627598187	0.18195144958706	-0.308052344841126	-1.55855607722377	8
ENSG00000092201	SUPT16H	0.979135979287161	0.679154889083097	0.452198568910986	-0.782779131330136	-1.32771030595111	8
ENSG00000092203	TOX4	-1.59760244543111	-0.335040212464317	0.567644611197103	0.884469620241596	0.480528426456728	10
ENSG00000092208	GEMIN2	1.16174103129538	0.813035516071956	-0.249053213442977	-0.394757506513568	-1.33096582741079	8
ENSG00000092295	TGM1	0.0659127128813285	-0.706915307132476	-0.560266393335076	-0.508532815735418	1.70980180332164	2
ENSG00000092330	TINF2	-1.33568550069691	1.37164530297365	0.428997689556754	-0.378083783273417	-0.0868737085600976	1
ENSG00000092345	DAZL	1.65179645799778	-0.723888226443945	-0.537298490013115	0.242060333891723	-0.63267007543244	6
ENSG00000092421	SEMA6A	0.914279143484072	-1.2156517036722	0.380905687909328	0.837169203702987	-0.916702331424189	7
ENSG00000092439	TRPM7	0.593998055403964	1.34618787599275	-0.0323496964800847	-0.870316502002435	-1.03751973291419	9
ENSG00000092445	TYRO3	1.31021991269731	0.665738357480041	-0.081854055402793	-1.08776590406689	-0.806338310707672	9
ENSG00000092470	WDR76	0.879093751454297	0.745375193425003	0.545644930704386	-1.18299694564571	-0.987116929937978	8
ENSG00000092529	CAPN3	-0.593767036909501	-0.565750146403	-0.449736312237008	-0.151996563856056	1.76125005940556	2
ENSG00000092531	SNAP23	1.16715293550049	-1.41138845013875	-0.214280536148713	-0.268085937765152	0.726601988552128	6
ENSG00000092607	TBX15	-1.01231274721075	-0.841252135200615	0.340279143937551	1.4661183754815	0.0471673629923173	3
ENSG00000092621	PHGDH	0.806652777395993	1.08179934477386	0.15802453324414	-1.1964670358964	-0.850009619517593	9
ENSG00000092758	COL9A3	1.70530930993031	-0.155709166396025	-0.147022451488093	-0.524586949300277	-0.877990742745915	6
ENSG00000092820	EZR	1.72012380298089	-0.363793023948372	-0.00868981142514732	-0.692329083637304	-0.655311883970064	6
ENSG00000092841	MYL6	0.226435894170756	-1.52693331094047	-0.270464573257427	0.391723723760624	1.17923826626652	10
ENSG00000092847	AGO1	1.15979041408774	0.572203648768035	0.30827428756636	-1.2949874747047	-0.745280875717427	9
ENSG00000092850	TEKT2	-0.0490368962809099	1.39486748314275	0.501494527826927	-0.706708315447796	-1.14061679924097	8
ENSG00000092853	CLSPN	0.976856691105088	0.695585488477634	0.484808691570037	-1.07679441181482	-1.08045645933794	8
ENSG00000092871	RFFL	1.54544129624766	-1.10154178675735	0.296323201593382	-0.505101394202468	-0.235121316881225	6
ENSG00000092929	UNC13D	1.7010023488832	-0.078631236745583	-0.73787067043852	-0.155209722204005	-0.72929071949509	6
ENSG00000092931	MFSD11	-1.71033776015288	0.683817837535759	0.685474763032064	0.369402392834337	-0.0283572332492834	4
ENSG00000092964	DPYSL2	0.870784934687378	0.564094675260579	0.645861698944789	-1.45368122982158	-0.627060079071169	8
ENSG00000092969	TGFB2	-1.10090034260727	-1.0700244141607	0.602893434465839	0.625547081355319	0.942484240946808	10
ENSG00000092978	GPATCH2	-0.251989247327399	-0.0776345510027431	0.602026398009049	1.19250802195864	-1.46491062163755	5
ENSG00000093000	NUP50	1.26162443141578	0.580504605482193	0.160065076806563	-0.857384263790623	-1.14480984991391	8
ENSG00000093009	CDC45	0.875311842572949	0.667468672452407	0.638176820855271	-1.12761116316664	-1.05334617271399	8
ENSG00000093010	COMT	-0.763706557533435	-1.09282582492159	-0.0476611116180317	0.500856236128467	1.40333725794459	10
ENSG00000093072	CECR1	0.973610852604005	0.921407110881595	-0.0282665617326404	-0.453838712093012	-1.41291268965995	8
ENSG00000093100	XXbac-B461K10.4	-0.286793675223229	1.33013662489364	0.403042962881293	-0.0376179373952212	-1.40876797515649	5
ENSG00000093144	ECHDC1	-0.759107543822811	-0.0135217999764347	1.72369681621615	-0.466112614770682	-0.484954857646212	4
ENSG00000093167	LRRFIP2	-0.457393444410338	0.0645629421052581	-0.774444789910626	-0.535646126442438	1.70292141865814	2
ENSG00000093183	SEC22C	0.417111329761515	-0.254440135064612	1.41813231411849	-0.290047265487957	-1.29075624332744	7
ENSG00000093217	XYLB	0.321941963043019	0.675044148232795	1.09035988073405	-1.23508545076492	-0.85226054124494	8
ENSG00000094631	HDAC6	-0.676510927237903	0.494813112009084	1.0330311467092	0.540758545746841	-1.39209187722723	5
ENSG00000094755	GABRP	1.75230386443384	-0.127028563039074	-0.637117706015364	-0.396231409142142	-0.591926186237265	6
ENSG00000094804	CDC6	1.10489588994747	0.669193282464552	0.325619918837412	-1.15224584798985	-0.947463243259591	8
ENSG00000094841	UPRT	1.43234588689319	0.515551898087764	-1.13902222532886	-0.574849098968723	-0.234026460683374	9
ENSG00000094880	CDC23	0.545306669696963	0.962781674105783	0.514875824094183	-0.529609197464926	-1.493354970432	8
ENSG00000094914	AAAS	0.573935205090241	1.03682689713296	0.372113865823055	-0.495846880251987	-1.48702908779427	8
ENSG00000094916	CBX5	0.440290605943205	0.740197152273074	0.733987489745451	-0.291314585840155	-1.62316066212157	8
ENSG00000094975	SUCO	0.238790263257273	-1.15652122285887	1.33148182657009	0.4042706729443	-0.81802153991279	7
ENSG00000095002	MSH2	1.2846791095403	0.401032103385168	0.275794122413064	-0.673377612299729	-1.2881277230388	8
ENSG00000095015	MAP3K1	0.645118566907916	1.37687766315935	-0.339008077463309	-0.561423640665239	-1.12156451193872	9
ENSG00000095059	DHPS	0.156885320328884	1.11922335404679	0.326043062377818	0.0153115726418354	-1.61746330939533	8
ENSG00000095066	HOOK2	1.25530202860859	-0.766115955340314	0.306084639725959	0.447162725826342	-1.24243343882058	7
ENSG00000095139	ARCN1	0.361030380460012	0.913604852402748	-0.133886604997122	-1.65812518133416	0.517376553468511	9
ENSG00000095203	EPB41L4B	1.77451803993576	-0.356454408216174	-0.448045113495448	-0.647510942533757	-0.322507575690385	6
ENSG00000095209	TMEM38B	-1.19600751437392	-0.475743630263961	-0.361582313423448	0.747158121925157	1.28617533613617	10
ENSG00000095261	PSMD5	1.18060246955428	0.661736690456208	0.217294743082974	-1.0329353348527	-1.02669856824077	8
ENSG00000095303	PTGS1	0.668546965649633	0.483113292692392	-1.26413791750559	-0.869848697265375	0.982326356428937	2
ENSG00000095319	NUP188	0.963669804886339	0.754686583521621	0.4203175029424	-0.931208639830195	-1.20746525152016	8
ENSG00000095321	CRAT	-1.26084552282778	-0.486318011518139	0.809866737612063	-0.265727725960385	1.20302452269424	10
ENSG00000095370	SH2D3C	-0.465061903022295	-0.0783363671217654	1.74399967694029	-0.512767573169921	-0.687833833626303	4
ENSG00000095380	NANS	0.522290120462244	1.49535499225398	-0.813202210353269	-0.830790138624593	-0.373652763738366	9
ENSG00000095383	TBC1D2	-0.330855656303904	-1.00839284679876	-0.68473506233052	0.589758695985921	1.43422486944726	10
ENSG00000095397	DFNB31	-0.210178594661182	1.13370960774852	0.906101027374177	-0.618394268249986	-1.21123777221153	8
ENSG00000095485	CWF19L1	0.885415685503259	0.676358051799778	0.486952676253353	-0.564571959624505	-1.48415445393188	8
ENSG00000095539	SEMA4G	0.740912530232017	0.355518473048499	0.984399850492546	-1.34919014347594	-0.73164071029712	8
ENSG00000095564	BTAF1	0.285794497334284	1.02254856676202	0.187399209939204	0.179214348482934	-1.67495662251844	8
ENSG00000095574	IKZF5	0.193576640895373	-0.557716819966436	0.909796248263787	0.883649493621955	-1.42930556281468	7
ENSG00000095587	TLL2	0.999024093596159	-0.853698709051908	-0.901060426037377	-0.388837036673213	1.14457207816634	2
ENSG00000095596	CYP26A1	1.78113558045278	-0.28548341006085	-0.486819562982628	-0.514172451418725	-0.494660155990578	6
ENSG00000095627	TDRD1	-0.0146801648687281	-0.628314194347648	-0.57471708077971	-0.5165987365332	1.73431017652929	2
ENSG00000095637	SORBS1	0.822289208788951	0.0315543218844437	-1.59384765758722	0.874329027022539	-0.134324900108716	6
ENSG00000095713	CRTAC1	1.15840367554085	0.971581112234594	-0.444308245639072	-0.623785141274144	-1.06189140086223	9
ENSG00000095739	BAMBI	0.815680719012456	1.22066777075154	-0.203971605950153	-1.16541546680414	-0.666961417009702	9
ENSG00000095752	IL11	0.396349620770357	-0.636096472556764	-0.678549688506045	-0.671387953950074	1.58968449424253	2
ENSG00000095777	MYO3A	1.7628963550218	-0.149463432684782	-0.503611811153178	-0.541111678947364	-0.568709432236472	6
ENSG00000095787	WAC	0.563933083767491	0.776351848909029	0.360127677489292	0.0169337693078257	-1.71734637947364	8
ENSG00000095794	CREM	-0.467530002970705	-0.686146335374974	-0.898471930601597	1.47200621104085	0.580142057906431	10
ENSG00000095906	NUBP2	0.450988719380489	0.391839601210462	1.07972519384047	-0.400403153016585	-1.52215036141483	8
ENSG00000095932	C19orf77	1.2202348507641	0.961230088954156	-0.710084750865425	-0.722209708972101	-0.749170479880729	9
ENSG00000095951	HIVEP1	0.379304151264102	0.102748129689804	1.07373523224127	0.0830436512944847	-1.63883116448966	7
ENSG00000096060	FKBP5	1.23423027493791	0.301752767721854	0.464734925497216	-0.710353681912384	-1.29036428624459	8
ENSG00000096063	SRPK1	0.878630040990156	0.882568347947169	0.377570115286464	-1.1677656857876	-0.971002818436187	8
ENSG00000096070	BRPF3	1.42138553901266	-0.560404509739463	0.312977405247744	0.0758050145081722	-1.24976344902912	7
ENSG00000096080	MRPS18A	1.24190533847903	0.552651363434056	0.237118914875738	-0.88901250525507	-1.14266311153376	8
ENSG00000096092	TMEM14A	0.172403403571024	0.756350463642715	0.35863156277764	-1.74843563126336	0.461050201271983	9
ENSG00000096093	EFHC1	-0.40946940041962	0.249548202868571	0.666626541339219	1.01102353917512	-1.51772888296329	5
ENSG00000096384	HSP90AB1	0.691266683846784	1.13604211913769	0.133438334321497	-0.59860910065254	-1.36213803665344	8
ENSG00000096401	CDC5L	0.767805277185307	0.665062776986868	0.565001937738666	-0.427446974621838	-1.570423017289	8
ENSG00000096433	ITPR3	1.68192877911158	0.0443655991819551	-0.836383245633883	-0.636840206169216	-0.253070926490439	6
ENSG00000096654	ZNF184	-0.582705913051111	-0.128752616104776	1.17483941902488	0.806641871257876	-1.27002276112687	5
ENSG00000096696	DSP	0.502950046456588	1.42490224637082	-0.779156814726464	-1.04861498777067	-0.100080490330272	9
ENSG00000096717	SIRT1	1.48540618154539	-0.051343659451622	0.1401931531091	-0.271309207253537	-1.30294646794933	6
ENSG00000096746	HNRNPH3	0.775755571536724	0.294753529547555	0.718525436583349	-0.121625763333886	-1.66740877433374	8
ENSG00000096872	IFT74	0.52124055950014	1.2685232216559	0.188847581041484	-0.738265599560066	-1.24034576263746	8
ENSG00000096968	JAK2	-1.58613361430238	-0.342721732439444	0.571790025131435	0.922423000194855	0.434642321415537	10
ENSG00000097007	ABL1	0.699387246563783	-0.469039807308725	1.34469298245915	-0.439465792402157	-1.13557462931205	7
ENSG00000097021	ACOT7	1.47732511948234	-0.418619111716079	0.278597533807482	-1.24764294673694	-0.089660594836807	6
ENSG00000097033	SH3GLB1	-1.2010634501606	-0.840951234739569	0.184280678601704	1.14182289282306	0.715911113475406	10
ENSG00000097046	CDC7	0.933892649012253	0.721571672445949	0.499821949764475	-0.945871733710932	-1.20941453751175	8
ENSG00000097096	SYDE2	-0.0773472466515639	-0.553323706588128	1.18270943979368	0.757584988251571	-1.30962347480556	7
ENSG00000099139	PCSK5	-0.522017958691461	1.59187458850539	0.311703464794288	-0.424397476738101	-0.957162617870115	1
ENSG00000099194	SCD	0.273730609726566	1.39880762539294	0.196387544870357	-1.23728208283591	-0.631643697153954	9
ENSG00000099203	TMED1	0.71208415709641	0.378930007428957	-0.0982381740021747	-1.68947126565207	0.696695275128874	9
ENSG00000099204	ABLIM1	-0.0175947976455175	1.38826838613353	-1.32567036991266	-0.418725495905202	0.37372227732985	1
ENSG00000099219	ERMP1	1.26907801614338	0.813552082423899	-1.04716528736213	-0.735591501633751	-0.299873309571398	9
ENSG00000099246	RAB18	-0.0485954795448242	-1.53745256760506	0.474889992111102	-0.0733174128769264	1.18447546791572	10
ENSG00000099250	NRP1	-0.538532869829863	1.02562485117899	-0.55790318116733	-1.04725615248414	1.11806735230234	2
ENSG00000099251	HSD17B7P2	0.450109321742917	-0.354422512670016	0.626793988798832	0.867158218157087	-1.58963901602882	7
ENSG00000099256	PRTFDC1	0.213047546147978	0.789326238384829	1.02635882542918	-0.682489526206373	-1.34624308375561	8
ENSG00000099260	PALMD	-1.06241502584544	-1.06376667139223	0.708415958592414	1.05005127822529	0.367714460419968	10
ENSG00000099282	TSPAN15	0.370262394453944	-0.0249858491404407	1.08287933131339	0.199661416327211	-1.62781729295411	7
ENSG00000099284	H2AFY2	0.179618725616106	1.04644302374439	0.735790594950454	-0.529886261832654	-1.43196608247829	8
ENSG00000099290	FAM21A	0.704074998340629	0.900003648769267	0.00613963565942108	-1.64112130478461	0.0309030220152921	9
ENSG00000099308	MAST3	0.660382933630162	0.601923177802814	0.826726404768259	-1.45444179632659	-0.634590719874642	8
ENSG00000099326	MZF1	0.143206757340395	0.527429160797427	0.996118186542372	-0.0209657523516082	-1.64578835232859	5
ENSG00000099330	OCEL1	1.16357677672004	1.02466787246863	-0.730953025625477	-0.727406440235037	-0.729885183328153	9
ENSG00000099331	MYO9B	0.878878825932384	0.43490355780938	0.796449756042154	-1.3530748329317	-0.757157306852221	8
ENSG00000099337	KCNK6	1.64468747542722	-0.660629657791658	-0.646307449967839	-0.60695085543932	0.269200487771599	6
ENSG00000099338	CATSPERG	-0.440473774926468	-0.653856205785272	0.0894617529935685	1.69942438804069	-0.694556160322519	3
ENSG00000099341	PSMD8	-0.00113939366170262	-0.196136556577366	-0.545359304109248	-0.930288845972973	1.67292410032129	2
ENSG00000099364	FBXL19	0.73326611001614	1.09523108751406	0.228908598906588	-0.811987388176616	-1.24541840826017	8
ENSG00000099365	STX1B	1.0866962737069	0.709967842512045	0.139509675922103	-0.509180889927911	-1.42699290221313	8
ENSG00000099377	HSD3B7	0.137932908232137	-1.60038633285996	-0.0231516302969791	0.345504836286632	1.14010021863817	10
ENSG00000099381	SETD1A	0.819381720716406	0.447253384052311	0.686046178131158	-0.363382016668682	-1.58929926623119	8
ENSG00000099385	BCL7C	-0.553637810302923	-0.0512499950594589	1.33318571742416	-1.27196653999499	0.543668627933216	4
ENSG00000099617	EFNA2	0.751167321266754	0.276875819002884	1.02860579485998	-0.723238304401055	-1.33341063072857	8
ENSG00000099622	CIRBP	-1.40308021857049	0.502683448699412	1.17401706632826	0.289174091687141	-0.562794388144329	4
ENSG00000099624	ATP5D	0.288326728600254	-0.894913605807453	1.58822678042016	-0.727171998225113	-0.254467904987838	4
ENSG00000099625	C19orf26	1.28108825122026	0.776450708131893	-0.868385107267479	-0.210649163345358	-0.978504688739321	9
ENSG00000099783	HNRNPM	1.32212307418521	-0.0375058621442115	0.62354603889211	-0.810501110966826	-1.09766213996629	8
ENSG00000099785	MARCH2	0.843868995757421	-1.63838721100619	-0.149491317438234	0.211574533920934	0.732434998766068	2
ENSG00000099795	NDUFB7	0.880173672491127	0.531903170588132	-0.682287460956605	-1.41621787468844	0.686428492565785	9
ENSG00000099797	TECR	0.752557528588842	1.20075940745353	0.0416972500757288	-0.992284569435559	-1.00272961668254	9
ENSG00000099800	TIMM13	1.32058622982771	0.738807008907068	-0.406691879730872	-1.12560561857023	-0.527095740433668	9
ENSG00000099804	CDC34	-0.296539297550466	1.71805689013973	-0.855251312069732	-0.46828363341057	-0.097982647108956	1
ENSG00000099810	MTAP	0.758782966859291	0.583889918996588	0.837419771396298	-1.0369092367292	-1.14318342052298	8
ENSG00000099812	MISP	-0.642403537138195	-0.628008471238378	-0.633849012191581	0.252826045819101	1.65143497474905	2
ENSG00000099814	CEP170B	0.999888273053878	-0.354184868806844	-0.921938064905666	-0.85854056752757	1.1347752281862	2
ENSG00000099817	POLR2E	0.446169818652162	1.22312900008079	0.332916231529888	-1.30902161308429	-0.693193437178554	9
ENSG00000099821	POLRMT	1.2903054571536	0.463520310634686	-0.34749844449037	0.00769051109618964	-1.41401783439411	8
ENSG00000099822	HCN2	1.32429163744933	-0.56079725426196	-0.801355945663464	-0.783836307644921	0.821697870121016	6
ENSG00000099840	IZUMO4	-1.49093512551972	-0.301808777113686	0.893784348082714	-0.0420023242868585	0.940961878837552	10
ENSG00000099849	RASSF7	1.46086562727013	0.284036317562587	-1.17166513079725	-0.63882260074435	0.065585786708885	6
ENSG00000099860	GADD45B	-1.05856533302769	-1.12507968982435	0.606933377915579	0.82195043803065	0.754761206905813	10
ENSG00000099864	PALM	-1.64823395131761	-0.260775789919958	0.65243964200808	0.619364973575197	0.637205125654297	10
ENSG00000099866	MADCAM1	1.73918692314885	-0.258435273533195	-0.525516049558125	-0.180940018934484	-0.774295581123045	6
ENSG00000099869	IGF2-AS	-1.37849323590969	0.550569797007925	0.58565006190499	0.96502504235921	-0.722751665362438	5
ENSG00000099875	MKNK2	1.03826765311387	0.992676908961615	-0.0657077236108652	-1.00708691265241	-0.958149925812216	9
ENSG00000099889	ARVCF	1.7179473774136	-0.283167095714979	-0.187025468204774	-0.345445510867222	-0.902309302626625	6
ENSG00000099899	TRMT2A	-0.164479655835642	0.746525601645067	0.853685454735229	0.192135614568263	-1.62786701511292	5
ENSG00000099901	RANBP1	1.00589652089027	0.766795859782216	0.358381171550676	-1.04293155473304	-1.08814199749012	8
ENSG00000099904	ZDHHC8	0.137436487561918	0.627643302624721	1.16740437006051	-0.543693492078646	-1.3887906681685	8
ENSG00000099910	KLHL22	-1.11222316712804	-0.57989377619758	1.36119202718797	0.674914835573603	-0.343989919435951	4
ENSG00000099917	MED15	-0.0366627538231494	0.591678879309774	1.34860913354763	-0.857126865655442	-1.04649839337881	8
ENSG00000099940	SNAP29	-1.38237311571384	-0.518151628931718	1.23536371984332	0.141242665094442	0.523918359707804	4
ENSG00000099942	CRKL	0.662503361000782	0.928551347503207	0.336900752766111	-0.36112059823233	-1.56683486303777	8
ENSG00000099949	LZTR1	-1.15185603463946	-0.718000008413185	1.4189901869409	0.371259027648925	0.0796068284628173	4
ENSG00000099953	MMP11	-0.623466737240892	-0.316500066043008	-0.0334352750381335	-0.745419737202094	1.71882181552413	2
ENSG00000099954	CECR2	1.39691368300854	0.360038211180674	-0.292283237535837	-0.11550857461762	-1.34916008203575	6
ENSG00000099956	SMARCB1	0.748727645043621	0.712216815039191	0.726085789480265	-1.01165276473214	-1.17537748483094	8
ENSG00000099957	P2RX6	-0.819314696640071	-0.245595476840386	-0.563357014174147	-0.0873674175447337	1.71563460519934	2
ENSG00000099958	DERL3	1.46812778394979	-0.842175981226898	0.449350925231535	-0.116174084483036	-0.959128643471393	7
ENSG00000099960	SLC7A4	1.09548200022287	-0.623728368457759	-0.985080250093767	-0.552270217740558	1.06559683606922	2
ENSG00000099968	BCL2L13	-1.00729673124261	0.566550229093857	-1.16360269836237	0.910421343659535	0.693927856851584	10
ENSG00000099977	DDT	1.36347243155412	-0.327452128039825	0.0350539980246403	-1.38961243133554	0.318538129796602	6
ENSG00000099984	GSTT2	-1.44231251575646	-0.574373766464807	0.959065813716609	0.764120264371545	0.293500204133107	10
ENSG00000099991	CABIN1	0.908316639551167	0.775301407421335	0.472122446158768	-0.960907712104575	-1.19483278102669	8
ENSG00000099992	TBC1D10A	-0.967846242074162	-1.01065481026886	-0.0252884181745464	1.13155753063785	0.872231939879716	10
ENSG00000099994	SUSD2	1.6495506067172	-0.630024755196497	0.0129587936509181	-0.933897325026843	-0.0985873201447778	6
ENSG00000099995	SF3A1	1.0168548526136	0.767314317604462	0.271822949135766	-0.719941329461645	-1.33605078989218	8
ENSG00000099998	GGT5	-1.00603292802513	-1.04020157279868	0.208537267250526	0.62403928628423	1.21365794728906	10
ENSG00000099999	RNF215	-0.479074736708538	-1.27126282013141	0.834292097691827	1.17870479987802	-0.262659340729897	3
ENSG00000100003	SEC14L2	-1.13638846142614	-0.726896510634241	0.242823490959802	0.174490316344761	1.44597116475582	10
ENSG00000100014	SPECC1L	0.72892270838248	0.583454582408392	0.865095907258312	-1.021035998567	-1.15643719948218	8
ENSG00000100023	PPIL2	0.528625480380045	0.409504063878891	0.369877486000958	0.477502333927976	-1.78550936418787	5
ENSG00000100027	YPEL1	0.322443688784122	-1.20602283894248	0.754536395808369	1.02989378994838	-0.900851035598387	7
ENSG00000100028	SNRPD3	1.25021686269843	0.710009845015502	-0.00989917040174247	-1.09937542517796	-0.850952112134227	9
ENSG00000100029	PES1	0.884587165950019	0.909181351408539	0.211343348522261	-1.4124290887916	-0.592682777089223	9
ENSG00000100030	MAPK1	-0.658241445872345	-0.554965762140291	-0.00244877644357469	1.73028410918987	-0.51462812473366	3
ENSG00000100031	GGT1	0.954274680005251	1.18218326243891	-0.584340504388001	-0.506045318172938	-1.04607211988323	9
ENSG00000100033	PRODH	1.78572583467708	-0.435068175597927	-0.370801337963557	-0.443312236786719	-0.536544084328881	6
ENSG00000100034	PPM1F	-1.2335814635397	-0.52679724363438	0.552006524870317	1.36772016633396	-0.159347984030195	3
ENSG00000100036	SLC35E4	1.01432242950969	-1.49661175759314	0.0948453524384811	-0.37515901819571	0.762602993840686	2
ENSG00000100038	TOP3B	0.641167221014931	0.618634743912852	0.521014296031139	-0.0691023183719373	-1.71171394258698	8
ENSG00000100053	CRYBB3	-0.433539213512394	-0.0566425722343744	-0.624931579659221	1.74004494506521	-0.624931579659221	3
ENSG00000100056	DGCR14	0.82207326903376	-0.328630039161544	0.861382180879182	0.204755824259033	-1.55958123501043	7
ENSG00000100058	CRYBB2P1	-0.115475704457128	0.69935615555151	1.03394204684328	-0.0606280954349468	-1.55719440250272	5
ENSG00000100060	MFNG	1.59110000203057	-0.107793015669085	-0.088805729362463	-0.209102027222324	-1.1853992297767	6
ENSG00000100065	CARD10	1.30960745770948	-0.216550244845785	-0.812396659902165	-1.01744508998993	0.7367845370284	6
ENSG00000100068	LRP5L	-0.18092973899845	-0.901932961708854	0.907388913121394	1.16361588266869	-0.98814209508278	3
ENSG00000100075	SLC25A1	0.88169663650349	0.857423861552471	0.303790985935695	-1.41414056088408	-0.628770923107571	9
ENSG00000100077	ADRBK2	1.56522191224903	0.155459377318666	-1.16489561595098	-0.362987178155355	-0.192798495461363	6
ENSG00000100078	PLA2G3	1.23172623120605	0.463641902206401	0.354628724468173	-1.16796973200363	-0.882027125876994	8
ENSG00000100083	GGA1	0.159395143404862	-0.04884672086135	0.938803694763124	0.602329903125762	-1.6516820204324	7
ENSG00000100084	HIRA	1.0436115529457	0.70975864390803	0.325717437536696	-0.775230509638591	-1.30385712475183	8
ENSG00000100092	SH3BP1	0.709452317950343	1.33417825631253	-0.217159391056021	-0.940522000962322	-0.88594918224453	9
ENSG00000100095	SEZ6L	-0.394341569003581	1.78648394764939	-0.432893827591286	-0.427213043762981	-0.532035507291545	1
ENSG00000100097	LGALS1	-0.533537824180834	-0.716907710527864	0.277644053382185	-0.664929607963943	1.63773108929046	2
ENSG00000100099	HPS4	0.519565814564316	0.964221489414946	0.333053839015074	-0.187675278565823	-1.62916586442851	8
ENSG00000100100	PIK3IP1	-0.327323299581778	-1.00435990409484	-0.42935533719354	0.122513246776331	1.63852529409382	2
ENSG00000100101	NOL12	0.739774328486106	0.314775742794249	0.895119652635122	-0.403956168209535	-1.54571355570594	8
ENSG00000100104	SRRD	1.05608347720077	0.63767595226969	0.434188246108617	-1.17679444986998	-0.951153225709092	8
ENSG00000100105	PATZ1	1.03277176492465	-0.110672333001416	0.786185560597791	-0.204555099233089	-1.50372989328793	7
ENSG00000100106	TRIOBP	0.323516207260362	-0.0132085685398857	0.677171726127924	-1.70803855475531	0.720559189906913	2
ENSG00000100109	TFIP11	0.155602114656457	-0.4572765470899	1.28779751320447	0.407506153118335	-1.39362923388937	7
ENSG00000100116	GCAT	0.932007472534615	-0.0258822340506755	-0.0601819712137597	-1.59967471974499	0.753731452474812	2
ENSG00000100122	CRYBB1	1.7811459470277	-0.544373866199439	-0.516473314644196	-0.310067609146017	-0.41023115703805	6
ENSG00000100124	ANKRD54	-0.329414546032485	0.0247776385434615	1.69837406453704	-0.829431829333256	-0.564305327714756	4
ENSG00000100129	EIF3L	-0.334892448119025	0.638193281587886	0.631788119752552	0.682282571264343	-1.61737152448576	5
ENSG00000100138	NHP2L1	1.32030417170932	0.661888176665885	-0.0956570359561134	-1.06582973176086	-0.820705580658226	9
[truncated: 20,939 more rows]

## Sheet: Cluster 1 GOTERM
Category	Term	Ont	N	DE	P.DE
GO:0009790	embryo development	BP	935	114	8.36856e-21
GO:0007389	pattern specification process	BP	433	72	8.53403e-21
GO:0001501	skeletal system development	BP	483	76	2.01882e-20
GO:0048562	embryonic organ morphogenesis	BP	282	56	4.32141e-20
GO:0048598	embryonic morphogenesis	BP	565	82	1.0522e-19
GO:0003002	regionalization	BP	328	60	1.38498e-19
GO:0048568	embryonic organ development	BP	410	67	5.25113e-19
GO:0009952	anterior/posterior pattern specification	BP	200	45	1.35961e-18
GO:0009792	embryo development ending in birth or egg hatching	BP	560	74	1.30029e-15
GO:0009653	anatomical structure morphogenesis	BP	2507	204	1.97912e-15
GO:0043009	chordate embryonic development	BP	556	73	2.88226e-15
GO:0009887	animal organ morphogenesis	BP	965	103	7.53803e-15
GO:0048646	anatomical structure formation involved in morphogenesis	BP	1144	115	1.22895e-14
GO:0048706	embryonic skeletal system development	BP	123	30	7.92413e-14
GO:0048705	skeletal system morphogenesis	BP	206	39	1.14255e-13
GO:0051216	cartilage development	BP	180	34	4.6375e-12
GO:0035295	tube development	BP	570	66	2.14737e-11
GO:0035239	tube morphogenesis	BP	345	48	2.44441e-11
GO:0048731	system development	BP	4167	280	6.86981e-11
GO:0048856	anatomical structure development	BP	5307	340	7.20917e-11
GO:0009888	tissue development	BP	1709	139	1.72409e-10
GO:0072359	circulatory system development	BP	913	88	1.94686e-10
GO:0048704	embryonic skeletal system morphogenesis	BP	93	22	3.1358e-10
GO:0032502	developmental process	BP	5709	357	3.97282e-10
GO:0007275	multicellular organism development	BP	4736	306	5.25458e-10
GO:0048513	animal organ development	BP	3035	213	9.45079e-10
GO:0061448	connective tissue development	BP	231	35	1.27977e-09
GO:0044767	single-organism developmental process	BP	5606	349	1.33899e-09
GO:0035282	segmentation	BP	93	21	1.97304e-09
GO:0048869	cellular developmental process	BP	3868	255	5.25364e-09
GO:0060562	epithelial tube morphogenesis	BP	307	40	7.80554e-09
GO:0060429	epithelium development	BP	1038	91	1.12005e-08
GO:0048863	stem cell differentiation	BP	165	27	1.88168e-08
GO:0072358	cardiovascular system development	BP	600	61	1.99031e-08
GO:0001568	blood vessel development	BP	572	59	2.03639e-08
GO:0003007	heart morphogenesis	BP	225	32	3.09016e-08
GO:0001944	vasculature development	BP	593	60	3.10384e-08
GO:0048729	tissue morphogenesis	BP	609	61	3.43458e-08
GO:0009855	determination of bilateral symmetry	BP	122	22	6.54931e-08
GO:0009799	specification of symmetry	BP	123	22	7.6227e-08
GO:0044763	single-organism cellular process	BP	11664	629	8.80562e-08
GO:0007368	determination of left/right symmetry	BP	114	21	8.87557e-08
GO:0002009	morphogenesis of an epithelium	BP	511	53	9.05635e-08
GO:0044707	single-multicellular organism process	BP	5802	348	1.21295e-07
GO:0060485	mesenchyme development	BP	240	32	1.43088e-07
GO:0061311	cell surface receptor signaling pathway involved in heart development	BP	26	10	1.52853e-07
GO:0007507	heart development	BP	493	51	1.72381e-07
GO:0044699	single-organism process	BP	12914	683	1.73596e-07
GO:0007423	sensory organ development	BP	497	51	2.21694e-07
GO:0048514	blood vessel morphogenesis	BP	487	50	2.87031e-07
GO:0050793	regulation of developmental process	BP	2227	156	3.54252e-07
GO:0002062	chondrocyte differentiation	BP	94	18	4.01347e-07
GO:0060021	palate development	BP	85	17	4.39103e-07
GO:0030154	cell differentiation	BP	3537	227	4.88353e-07
GO:0007498	mesoderm development	BP	126	21	5.14737e-07
GO:0021602	cranial nerve morphogenesis	BP	23	9	5.46549e-07
GO:0007399	nervous system development	BP	2099	147	8.44454e-07
GO:0043583	ear development	BP	198	27	8.54211e-07
GO:0001525	angiogenesis	BP	411	43	1.18693e-06
GO:0055123	digestive system development	BP	144	22	1.28553e-06
GO:0042471	ear morphogenesis	BP	112	19	1.34892e-06
GO:0061371	determination of heart left/right asymmetry	BP	64	14	1.46399e-06
GO:0048736	appendage development	BP	168	24	1.485e-06
GO:0060173	limb development	BP	168	24	1.485e-06
GO:0035107	appendage morphogenesis	BP	146	22	1.63011e-06
GO:0035108	limb morphogenesis	BP	146	22	1.63011e-06
GO:0003143	embryonic heart tube morphogenesis	BP	65	14	1.78482e-06
GO:0090596	sensory organ morphogenesis	BP	244	30	1.97405e-06
GO:0003306	Wnt signaling pathway involved in heart development	BP	10	6	2.05878e-06
GO:0001756	somitogenesis	BP	66	14	2.16698e-06
GO:0045595	regulation of cell differentiation	BP	1490	110	2.37196e-06
GO:2000736	regulation of stem cell differentiation	BP	34	10	2.66379e-06
GO:2000026	regulation of multicellular organismal development	BP	1671	120	3.07168e-06
GO:0001947	heart looping	BP	59	13	3.17703e-06
GO:0048565	digestive tract development	BP	132	20	4.40135e-06
GO:0021546	rhombomere development	BP	7	5	4.72584e-06
GO:0045165	cell fate commitment	BP	242	29	4.8662e-06
GO:0072132	mesenchyme morphogenesis	BP	46	11	7.83228e-06
GO:0030326	embryonic limb morphogenesis	BP	126	19	8.14564e-06
GO:0035113	embryonic appendage morphogenesis	BP	126	19	8.14564e-06
GO:0060911	cardiac cell fate commitment	BP	12	6	8.34053e-06
GO:0035050	embryonic heart tube development	BP	75	14	1.05295e-05
GO:0007369	gastrulation	BP	177	23	1.22492e-05
GO:0051130	positive regulation of cellular component organization	BP	1119	85	1.28859e-05
GO:0035136	forelimb morphogenesis	BP	40	10	1.32714e-05
GO:0000902	cell morphogenesis	BP	1093	83	1.65583e-05
GO:0023019	signal transduction involved in regulation of gene expression	BP	19	7	1.66581e-05
GO:0032989	cellular component morphogenesis	BP	1179	88	1.75311e-05
GO:0005578	proteinaceous extracellular matrix	CC	356	36	1.83524e-05
GO:0048762	mesenchymal cell differentiation	BP	183	23	2.11672e-05
GO:0048332	mesoderm morphogenesis	BP	70	13	2.29302e-05
GO:0044710	single-organism metabolic process	BP	4018	242	2.37547e-05
GO:0042474	middle ear morphogenesis	BP	20	7	2.45751e-05
GO:0003129	heart induction	BP	5	4	2.47116e-05
GO:0032526	response to retinoic acid	BP	102	16	2.51699e-05
GO:0070848	response to growth factor	BP	617	53	2.54381e-05
GO:0034464	BBSome	CC	9	5	2.6164e-05
GO:0060349	bone morphogenesis	BP	82	14	3.02912e-05
GO:0021545	cranial nerve development	BP	44	10	3.26673e-05
GO:0022008	neurogenesis	BP	1393	99	3.71472e-05
GO:2000738	positive regulation of stem cell differentiation	BP	15	6	3.99247e-05
GO:0051093	negative regulation of developmental process	BP	806	64	4.32923e-05
GO:0061053	somite development	BP	85	14	4.58452e-05
GO:0048468	cell development	BP	1827	123	4.75811e-05
GO:0010463	mesenchymal cell proliferation	BP	46	10	4.92192e-05
GO:0072001	renal system development	BP	276	29	5.88009e-05
GO:0072006	nephron development	BP	134	18	6.80486e-05
GO:0051239	regulation of multicellular organismal process	BP	2576	163	6.89158e-05
GO:0044444	cytoplasmic part	CC	7919	433	7.22009e-05
GO:0060324	face development	BP	48	10	7.24342e-05
GO:0001667	ameboidal-type cell migration	BP	322	32	7.35267e-05
GO:0005759	mitochondrial matrix	CC	411	38	7.76602e-05
GO:0001707	mesoderm formation	BP	68	12	7.93002e-05
GO:0043565	sequence-specific DNA binding	MF	1058	78	8.06716e-05
GO:0022603	regulation of anatomical structure morphogenesis	BP	957	72	8.18718e-05
GO:0035148	tube formation	BP	136	18	8.27609e-05
GO:0035051	cardiocyte differentiation	BP	113	16	9.01953e-05
GO:0032501	multicellular organismal process	BP	6828	379	9.12022e-05
GO:0060348	bone development	BP	175	21	9.39113e-05
GO:0001655	urogenital system development	BP	312	31	9.50919e-05
GO:0035115	embryonic forelimb morphogenesis	BP	32	8	9.8009e-05
GO:0048546	digestive tract morphogenesis	BP	50	10	0.000104345
GO:0060537	muscle tissue development	BP	343	33	0.000106765
GO:0050893	sensory processing	BP	3	3	0.000108084
GO:0090427	activation of meiosis	BP	3	3	0.000108084
GO:0090381	regulation of heart induction	BP	3	3	0.000108084
GO:0100012	regulation of heart induction by canonical Wnt signaling pathway	BP	3	3	0.000108084
GO:0030278	regulation of ossification	BP	177	21	0.000110597
GO:0045995	regulation of embryonic development	BP	115	16	0.000111519
GO:0090130	tissue migration	BP	231	25	0.000116384
GO:0035270	endocrine system development	BP	128	17	0.000123737
GO:0005604	basement membrane	CC	93	14	0.00012572
GO:0071363	cellular response to growth factor stimulus	BP	592	49	0.0001273
GO:0001503	ossification	BP	361	34	0.000127705
GO:0048732	gland development	BP	406	37	0.000128926
GO:0030030	cell projection organization	BP	1229	87	0.000129223
GO:0036342	post-anal tail morphogenesis	BP	18	6	0.00013091
GO:0001704	formation of primary germ layer	BP	117	16	0.000137123
GO:0048738	cardiac muscle tissue development	BP	180	21	0.000140556
GO:0036038	MKS complex	CC	12	5	0.000145823
GO:0001763	morphogenesis of a branching structure	BP	194	22	0.000149488
GO:1901576	organic substance biosynthetic process	BP	6074	340	0.000150255
GO:0048566	embryonic digestive tract development	BP	34	8	0.000155442
GO:0051890	regulation of cardioblast differentiation	BP	7	4	0.00016012
GO:0072078	nephron tubule morphogenesis	BP	73	12	0.000160913
GO:0032872	regulation of stress-activated MAPK cascade	BP	195	22	0.000161092
GO:0010638	positive regulation of organelle organization	BP	503	43	0.00016151
GO:0051094	positive regulation of developmental process	BP	1152	82	0.000169833
GO:0070302	regulation of stress-activated protein kinase signaling cascade	BP	196	22	0.000173486
GO:0061035	regulation of cartilage development	BP	64	11	0.000199368
GO:0031346	positive regulation of cell projection organization	BP	296	29	0.000200955
GO:0000977	RNA polymerase II regulatory region sequence-specific DNA binding	MF	588	48	0.000205577
GO:0072088	nephron epithelium morphogenesis	BP	75	12	0.000209525
GO:0035869	ciliary transition zone	CC	27	7	0.000210069
GO:0001012	RNA polymerase II regulatory region DNA binding	MF	589	48	0.000213826
GO:0009058	biosynthetic process	BP	6167	343	0.00023263
GO:0035137	hindlimb morphogenesis	BP	36	8	0.00023806
GO:0014033	neural crest cell differentiation	BP	76	12	0.000238188
GO:0021536	diencephalon development	BP	76	12	0.000238188
GO:0030323	respiratory tube development	BP	174	20	0.000245262
GO:0044429	mitochondrial part	CC	959	70	0.000250837
GO:0031090	organelle membrane	CC	2570	159	0.000259868
GO:0048754	branching morphogenesis of an epithelial tube	BP	149	18	0.000266758
GO:0035116	embryonic hindlimb morphogenesis	BP	28	7	0.000268654
GO:0061333	renal tubule morphogenesis	BP	77	12	0.00027012
GO:0072028	nephron morphogenesis	BP	77	12	0.00027012
GO:0048522	positive regulation of cellular process	BP	4580	263	0.000271474
GO:0032330	regulation of chondrocyte differentiation	BP	46	9	0.000274434
GO:0044420	extracellular matrix component	CC	125	16	0.000297742
GO:0060923	cardiac muscle cell fate commitment	BP	8	4	0.000308134
GO:0021612	facial nerve structural organization	BP	8	4	0.000308134
GO:0048645	animal organ formation	BP	57	10	0.000324411
GO:0001822	kidney development	BP	262	26	0.000344834
GO:0044281	small molecule metabolic process	BP	1897	122	0.00034535
GO:0021675	nerve development	BP	68	11	0.000345589
GO:0045597	positive regulation of cell differentiation	BP	817	61	0.00034858
GO:0000904	cell morphogenesis involved in differentiation	BP	619	49	0.000361468
GO:0010632	regulation of epithelial cell migration	BP	166	19	0.000366243
GO:0035265	organ growth	BP	140	17	0.000367735
GO:0019233	sensory perception of pain	BP	91	13	0.000368209
GO:0001085	RNA polymerase II transcription factor binding	MF	103	14	0.000375527
GO:0030182	neuron differentiation	BP	1184	82	0.000403098
GO:0007166	cell surface receptor signaling pathway	BP	2595	159	0.000408754
GO:0072080	nephron tubule development	BP	92	13	0.000410435
GO:0003308	negative regulation of Wnt signaling pathway involved in heart development	BP	4	3	0.000416924
GO:0042663	regulation of endodermal cell fate specification	BP	4	3	0.000416924
GO:0008078	mesodermal cell migration	BP	4	3	0.000416924
GO:0021615	glossopharyngeal nerve morphogenesis	BP	4	3	0.000416924
GO:0061317	canonical Wnt signaling pathway involved in cardiac muscle cell fate commitment	BP	4	3	0.000416924
GO:0046909	intermembrane transport	BP	4	3	0.000416924
GO:0061036	positive regulation of cartilage development	BP	30	7	0.000424997
GO:0003197	endocardial cushion development	BP	39	8	0.000426429
GO:0021915	neural tube development	BP	155	18	0.000433937
GO:0061138	morphogenesis of a branching epithelium	BP	182	20	0.000443818
GO:0090132	epithelium migration	BP	225	23	0.000489011
GO:0007350	blastoderm segmentation	BP	15	5	0.000490472
GO:0044711	single-organism biosynthetic process	BP	1298	88	0.000492228
GO:0030324	lung development	BP	170	19	0.000494462
GO:0061326	renal tubule development	BP	94	13	0.000507312
GO:0045444	fat cell differentiation	BP	198	21	0.000520508
GO:2000826	regulation of heart morphogenesis	BP	31	7	0.000526587
GO:0014807	regulation of somitogenesis	BP	9	4	0.00053371
GO:0021561	facial nerve development	BP	9	4	0.00053371
GO:0021610	facial nerve morphogenesis	BP	9	4	0.00053371
GO:0051601	exocyst localization	BP	9	4	0.00053371
GO:0031628	opioid receptor binding	MF	9	4	0.00053371
GO:0048839	inner ear development	BP	172	19	0.00057201
GO:0006935	chemotaxis	BP	534	43	0.000574221
GO:0048699	generation of neurons	BP	1305	88	0.000583176
GO:0042330	taxis	BP	535	43	0.000596592
GO:0045598	regulation of fat cell differentiation	BP	108	14	0.000612197
GO:0045944	positive regulation of transcription from RNA polymerase II promoter	BP	1008	71	0.000622128
GO:0003156	regulation of animal organ formation	BP	32	7	0.000646589
GO:0071772	response to BMP	BP	147	17	0.000649599
GO:0071773	cellular response to BMP stimulus	BP	147	17	0.000649599
GO:0048858	cell projection morphogenesis	BP	787	58	0.000666308
GO:0070887	cellular response to chemical stimulus	BP	2586	157	0.000675983
GO:0010628	positive regulation of gene expression	BP	1639	106	0.000716115
GO:0032990	cell part morphogenesis	BP	807	59	0.000730276
GO:0001837	epithelial to mesenchymal transition	BP	110	14	0.000737215
GO:0003700	transcription factor activity sequence-specific DNA binding	MF	1209	82	0.000756841
GO:0001071	nucleic acid binding transcription factor activity	MF	1210	82	0.000775536
GO:0007178	transmembrane receptor protein serine/threonine kinase signaling pathway	BP	307	28	0.000806162
GO:0060070	canonical Wnt signaling pathway	BP	292	27	0.000806234
GO:0030509	BMP signaling pathway	BP	137	16	0.000831683
GO:0032874	positive regulation of stress-activated MAPK cascade	BP	137	16	0.000831683
GO:0009953	dorsal/ventral pattern formation	BP	99	13	0.000837368
GO:0061180	mammary gland epithelium development	BP	64	10	0.00084242
GO:0003128	heart field specification	BP	10	4	0.000856004
GO:0021604	cranial nerve structural organization	BP	10	4	0.000856004
GO:0001101	response to acid chemical	BP	264	25	0.000881978
GO:0007267	cell-cell signaling	BP	1485	97	0.000882563
GO:0044249	cellular biosynthetic process	BP	5969	328	0.000885434
GO:0070304	positive regulation of stress-activated protein kinase signaling cascade	BP	138	16	0.000900112
GO:0060575	intestinal epithelial cell differentiation	BP	17	5	0.000933305
GO:0007379	segment specification	BP	17	5	0.000933305
GO:0006082	organic acid metabolic process	BP	936	66	0.000934125
GO:0002063	chondrocyte development	BP	25	6	0.00093799
GO:0030878	thyroid gland development	BP	25	6	0.00093799
GO:0072171	mesonephric tubule morphogenesis	BP	65	10	0.000953807
GO:0010631	epithelial cell migration	BP	222	22	0.000971369
GO:0003307	regulation of Wnt signaling pathway involved in heart development	BP	5	3	0.00100524
GO:0061316	canonical Wnt signaling pathway involved in heart development	BP	5	3	0.00100524
GO:0021563	glossopharyngeal nerve development	BP	5	3	0.00100524
GO:0051147	regulation of muscle cell differentiation	BP	153	17	0.0010223
GO:0030879	mammary gland development	BP	127	15	0.0010635
GO:0051240	positive regulation of multicellular organismal process	BP	1385	91	0.00106641
GO:0001654	eye development	BP	328	29	0.00107025
GO:0051148	negative regulation of muscle cell differentiation	BP	55	9	0.00107964
GO:0008283	cell proliferation	BP	1899	119	0.00108202
GO:0019752	carboxylic acid metabolic process	BP	855	61	0.00108988
GO:1901564	organonitrogen compound metabolic process	BP	2161	133	0.0010951
GO:0048589	developmental growth	BP	552	43	0.00111523
GO:0003705	transcription factor activity RNA polymerase II distal enhancer sequence-specific binding	MF	90	12	0.00114366
GO:0042995	cell projection	CC	1793	113	0.00119543
GO:0060541	respiratory system development	BP	197	20	0.00120632
GO:0072509	divalent inorganic cation transmembrane transporter activity	MF	169	18	0.0012066
GO:0000976	transcription regulatory region sequence-specific DNA binding	MF	671	50	0.00121316
GO:0002065	columnar/cuboidal epithelial cell differentiation	BP	103	13	0.00121686
GO:0044087	regulation of cellular component biogenesis	BP	756	55	0.00122215
GO:0045926	negative regulation of growth	BP	226	22	0.00122694
GO:0030099	myeloid cell differentiation	BP	331	29	0.00123173
GO:0048339	paraxial mesoderm development	BP	18	5	0.00124192
GO:0043436	oxoacid metabolic process	BP	860	61	0.00125383
GO:0007613	memory	BP	91	12	0.00126145
GO:0031589	cell-substrate adhesion	BP	301	27	0.00126735
GO:1905208	negative regulation of cardiocyte differentiation	BP	11	4	0.00129456
GO:0045836	positive regulation of meiotic nuclear division	BP	11	4	0.00129456
GO:0017146	NMDA selective glutamate receptor complex	CC	11	4	0.00129456
GO:0045596	negative regulation of cell differentiation	BP	606	46	0.0012951
GO:0071300	cellular response to retinoic acid	BP	68	10	0.00136238
GO:0014032	neural crest cell development	BP	68	10	0.00136238
GO:0042472	inner ear morphogenesis	BP	92	12	0.0013891
GO:0060993	kidney morphogenesis	BP	92	12	0.0013891
GO:0008284	positive regulation of cell proliferation	BP	812	58	0.00139518
GO:0051403	stress-activated MAPK cascade	BP	243	23	0.00140006
GO:0008610	lipid biosynthetic process	BP	609	46	0.00143032
GO:0001228	transcriptional activator activity RNA polymerase II transcription regulatory region sequence-specific binding	MF	319	28	0.00144216
GO:0002053	positive regulation of mesenchymal cell proliferation	BP	27	6	0.00144519
GO:0045893	positive regulation of transcription DNA-templated	BP	1310	86	0.00149686
GO:1903508	positive regulation of nucleic acid-templated transcription	BP	1310	86	0.00149686
GO:0005929	cilium	CC	495	39	0.0015153
GO:0016331	morphogenesis of embryonic epithelium	BP	145	16	0.00152645
GO:0031344	regulation of cell projection organization	BP	528	41	0.00152726
GO:0001649	osteoblast differentiation	BP	201	20	0.00154025
GO:1901566	organonitrogen compound biosynthetic process	BP	1348	88	0.00155773
GO:0019866	organelle inner membrane	CC	529	41	0.00158198
GO:0044283	small molecule biosynthetic process	BP	480	38	0.00158964
GO:0030857	negative regulation of epithelial cell differentiation	BP	37	7	0.00160746
GO:0071542	dopaminergic neuron differentiation	BP	37	7	0.00160746
GO:0032332	positive regulation of chondrocyte differentiation	BP	19	5	0.00161987
GO:0001759	organ induction	BP	19	5	0.00161987
GO:0048745	smooth muscle tissue development	BP	19	5	0.00161987
GO:0060438	trachea development	BP	19	5	0.00161987
GO:0030903	notochord development	BP	19	5	0.00161987
GO:0010002	cardioblast differentiation	BP	19	5	0.00161987
GO:0003351	epithelial cilium movement	BP	19	5	0.00161987
GO:0004970	ionotropic glutamate receptor activity	MF	19	5	0.00161987
GO:0001708	cell fate specification	BP	82	11	0.00172426
GO:0045766	positive regulation of angiogenesis	BP	120	14	0.00173343
GO:0001838	embryonic epithelial tube formation	BP	120	14	0.00173343
GO:0032543	mitochondrial translation	BP	120	14	0.00173343
GO:0001894	tissue homeostasis	BP	203	20	0.00173477
GO:0009948	anterior/posterior axis specification	BP	48	8	0.00179136
GO:0031098	stress-activated protein kinase signaling cascade	BP	248	23	0.00182848
GO:2000052	positive regulation of non-canonical Wnt signaling pathway	BP	12	4	0.00186892
GO:2000095	regulation of Wnt signaling pathway planar cell polarity pathway	BP	12	4	0.00186892
GO:0007494	midgut development	BP	12	4	0.00186892
GO:0072189	ureter development	BP	12	4	0.00186892
GO:0060536	cartilage morphogenesis	BP	12	4	0.00186892
GO:0072175	epithelial tube formation	BP	121	14	0.00187637
GO:0021532	neural tube patterning	BP	38	7	0.0018906
GO:1990837	sequence-specific double-stranded DNA binding	MF	703	51	0.00192456
GO:1903224	regulation of endodermal cell differentiation	BP	6	3	0.00193916
GO:0038031	non-canonical Wnt signaling pathway via JNK cascade	BP	6	3	0.00193916
GO:0060426	lung vasculature development	BP	6	3	0.00193916
GO:2000739	regulation of mesenchymal stem cell differentiation	BP	6	3	0.00193916
GO:0009996	negative regulation of cell fate specification	BP	6	3	0.00193916
GO:0009891	positive regulation of biosynthetic process	BP	1709	107	0.00200718
GO:0055024	regulation of cardiac muscle tissue development	BP	60	9	0.00203053
GO:0072009	nephron epithelium development	BP	109	13	0.00204678
GO:0072372	primary cilium	CC	206	20	0.00206544
GO:2000050	regulation of non-canonical Wnt signaling pathway	BP	20	5	0.00207589
GO:0060216	definitive hemopoiesis	BP	20	5	0.00207589
GO:0055026	negative regulation of cardiac muscle tissue development	BP	20	5	0.00207589
GO:0005234	extracellular-glutamate-gated ion channel activity	MF	20	5	0.00207589
GO:0060419	heart growth	BP	72	10	0.00211761
GO:0014031	mesenchymal cell development	BP	72	10	0.00211761
GO:0048864	stem cell development	BP	72	10	0.00211761
GO:0070371	ERK1 and ERK2 cascade	BP	251	23	0.00213571
GO:0003203	endocardial cushion morphogenesis	BP	29	6	0.00213816
GO:0050920	regulation of chemotaxis	BP	178	18	0.00216404
GO:0070372	regulation of ERK1 and ERK2 cascade	BP	237	22	0.00224586
GO:0007417	central nervous system development	BP	882	61	0.00226379
GO:0006649	phospholipid transfer to membrane	BP	2	2	0.00227147
GO:0006529	asparagine biosynthetic process	BP	2	2	0.00227147
GO:0060128	corticotropin hormone secreting cell differentiation	BP	2	2	0.00227147
GO:0021568	rhombomere 2 development	BP	2	2	0.00227147
GO:0021570	rhombomere 4 development	BP	2	2	0.00227147
GO:2001055	positive regulation of mesenchymal cell apoptotic process	BP	2	2	0.00227147
GO:1990034	calcium ion export from cell	BP	2	2	0.00227147
GO:0090081	regulation of heart induction by regulation of canonical Wnt signaling pathway	BP	2	2	0.00227147
GO:0090082	positive regulation of heart induction by negative regulation of canonical Wnt signaling pathway	BP	2	2	0.00227147
GO:1901321	positive regulation of heart induction	BP	2	2	0.00227147
GO:0072566	chemokine (C-X-C motif) ligand 1 production	BP	2	2	0.00227147
GO:2000338	regulation of chemokine (C-X-C motif) ligand 1 production	BP	2	2	0.00227147
GO:2000340	positive regulation of chemokine (C-X-C motif) ligand 1 production	BP	2	2	0.00227147
GO:0051892	negative regulation of cardioblast differentiation	BP	2	2	0.00227147
GO:1903445	protein transport from ciliary membrane to plasma membrane	BP	2	2	0.00227147
GO:0043614	multi-eIF complex	CC	2	2	0.00227147
GO:0004066	asparagine synthase (glutamine-hydrolyzing) activity	MF	2	2	0.00227147
GO:0003868	4-hydroxyphenylpyruvate dioxygenase activity	MF	2	2	0.00227147
GO:0005110	frizzled-2 binding	MF	2	2	0.00227147
GO:0040011	locomotion	BP	1494	95	0.00227661
GO:0044255	cellular lipid metabolic process	BP	1024	69	0.00230474
GO:0010557	positive regulation of macromolecule biosynthetic process	BP	1550	98	0.00231255
GO:0005743	mitochondrial inner membrane	CC	474	37	0.00231648
GO:1902680	positive regulation of RNA biosynthetic process	BP	1331	86	0.00235274
GO:0046394	carboxylic acid biosynthetic process	BP	253	23	0.00236405
GO:0007033	vacuole organization	BP	209	20	0.00244786
GO:0031128	developmental induction	BP	30	6	0.00256645
GO:0048846	axon extension involved in axon guidance	BP	40	7	0.00257146
GO:1902284	neuron projection extension involved in neuron projection guidance	BP	40	7	0.00257146
GO:1901862	negative regulation of muscle tissue development	BP	40	7	0.00257146
GO:0006928	movement of cell or subcellular component	BP	1741	108	0.00257441
GO:0044089	positive regulation of cellular component biogenesis	BP	428	34	0.00258331
GO:0045765	regulation of angiogenesis	BP	210	20	0.00258788
GO:0044421	extracellular region part	CC	3819	216	0.00259814
GO:0042659	regulation of cell fate specification	BP	13	4	0.00259837
GO:0051446	positive regulation of meiotic cell cycle	BP	13	4	0.00259837
GO:0005262	calcium channel activity	MF	112	13	0.00261047
GO:0060914	heart formation	BP	21	5	0.00261886
GO:0060326	cell chemotaxis	BP	240	22	0.0026245
GO:0048518	positive regulation of biological process	BP	5094	280	0.00264449
GO:0000122	negative regulation of transcription from RNA polymerase II promoter	BP	732	52	0.00270623
GO:0015085	calcium ion transmembrane transporter activity	MF	126	14	0.00274566
GO:0000981	RNA polymerase II transcription factor activity sequence-specific DNA binding	MF	647	47	0.00277172
GO:0051254	positive regulation of RNA metabolic process	BP	1376	88	0.00280309
GO:0061061	muscle structure development	BP	563	42	0.00283137
GO:0003205	cardiac chamber development	BP	154	16	0.00283559
GO:0060271	cilium morphogenesis	BP	242	22	0.00290576
GO:0045599	negative regulation of fat cell differentiation	BP	41	7	0.00297555
GO:0048592	eye morphogenesis	BP	141	15	0.00301683
GO:0007040	lysosome organization	BP	52	8	0.00302169
GO:0080171	lytic vacuole organization	BP	52	8	0.00302169
GO:1901861	regulation of muscle tissue development	BP	114	13	0.00305244
GO:0042476	odontogenesis	BP	114	13	0.00305244
GO:0050890	cognition	BP	243	22	0.00305565
GO:0030513	positive regulation of BMP signaling pathway	BP	31	6	0.00305601
GO:0048873	homeostasis of number of cells within a tissue	BP	31	6	0.00305601
GO:0022824	transmitter-gated ion channel activity	MF	31	6	0.00305601
GO:0022835	transmitter-gated channel activity	MF	31	6	0.00305601
GO:0050673	epithelial cell proliferation	BP	336	28	0.00305872
GO:1901681	sulfur compound binding	MF	228	21	0.00306427
GO:0060675	ureteric bud morphogenesis	BP	64	9	0.00319409
GO:0005770	late endosome	CC	214	20	0.00321719
GO:2000096	positive regulation of Wnt signaling pathway planar cell polarity pathway	BP	7	3	0.00327344
GO:0042661	regulation of mesodermal cell fate specification	BP	7	3	0.00327344
GO:0038030	non-canonical Wnt signaling pathway via MAPK cascade	BP	7	3	0.00327344
GO:0048341	paraxial mesoderm formation	BP	7	3	0.00327344
GO:0030915	Smc5-Smc6 complex	CC	7	3	0.00327344
GO:0060425	lung morphogenesis	BP	53	8	0.00341324
GO:0060976	coronary vasculature development	BP	42	7	0.00342647
GO:0044708	single-organism behavior	BP	387	31	0.00344768
GO:0015276	ligand-gated ion channel activity	MF	143	15	0.00345247
GO:0022834	ligand-gated channel activity	MF	143	15	0.00345247
GO:0060840	artery development	BP	77	10	0.0035003
GO:0032366	intracellular sterol transport	BP	14	4	0.0035016
GO:0007409	axonogenesis	BP	404	32	0.00355068
GO:0006629	lipid metabolic process	BP	1315	84	0.00358871
GO:0010634	positive regulation of epithelial cell migration	BP	103	12	0.00363768
GO:0001227	transcriptional repressor activity RNA polymerase II transcription regulatory region sequence-specific binding	MF	173	17	0.00381017
GO:0048608	reproductive structure development	BP	406	32	0.00382396
GO:0046330	positive regulation of JNK cascade	BP	117	13	0.00382802
GO:0007548	sex differentiation	BP	263	23	0.00384046
GO:0021983	pituitary gland development	BP	43	7	0.00392761
GO:0031966	mitochondrial membrane	CC	659	47	0.00393076
GO:0031012	extracellular matrix	CC	523	39	0.00395528
GO:0009798	axis specification	BP	91	11	0.00395873
GO:0007610	behavior	BP	540	40	0.00397529
GO:0060444	branching involved in mammary gland duct morphogenesis	BP	23	5	0.00400154
GO:0051904	pigment granule transport	BP	23	5	0.00400154
GO:0021904	dorsal/ventral neural tube patterning	BP	23	5	0.00400154
GO:0010810	regulation of cell-substrate adhesion	BP	174	17	0.00404082
GO:0003206	cardiac chamber morphogenesis	BP	118	13	0.00411939
GO:0046328	regulation of JNK cascade	BP	160	16	0.00414345
GO:0045017	glycerolipid biosynthetic process	BP	204	19	0.00417418
GO:1905207	regulation of cardiocyte differentiation	BP	33	6	0.00423976
GO:0042692	muscle cell differentiation	BP	344	28	0.00424132
GO:0050678	regulation of epithelial cell proliferation	BP	281	24	0.00429998
GO:0055007	cardiac muscle cell differentiation	BP	92	11	0.00430769
GO:0000979	RNA polymerase II core promoter sequence-specific DNA binding	MF	55	8	0.00431335
GO:0040007	growth	BP	926	62	0.00434076
GO:0060560	developmental growth involved in morphogenesis	BP	205	19	0.00440141
GO:0014706	striated muscle tissue development	BP	329	27	0.00441461
GO:0061458	reproductive system development	BP	410	32	0.00442434
GO:0048667	cell morphogenesis involved in neuron differentiation	BP	493	37	0.00443857
GO:0043227	membrane-bounded organelle	CC	11961	607	0.00450512
GO:0009987	cellular process	BP	14950	743	0.0045755
GO:0021700	developmental maturation	BP	236	21	0.00457859
GO:0060828	regulation of canonical Wnt signaling pathway	BP	236	21	0.00457859
GO:0031328	positive regulation of cellular biosynthetic process	BP	1680	103	0.00458677
GO:0006862	nucleotide transport	BP	15	4	0.00459655
GO:0021783	preganglionic parasympathetic fiber development	BP	15	4	0.00459655
GO:0071599	otic vesicle development	BP	15	4	0.00459655
GO:0042219	cellular modified amino acid catabolic process	BP	15	4	0.00459655
GO:0032048	cardiolipin metabolic process	BP	15	4	0.00459655
GO:0035493	SNARE complex assembly	BP	15	4	0.00459655
GO:0048018	receptor agonist activity	MF	15	4	0.00459655
GO:0030198	extracellular matrix organization	BP	330	27	0.00459704
GO:0030855	epithelial cell differentiation	BP	545	40	0.00464547
GO:0008083	growth factor activity	MF	162	16	0.004676
GO:0051270	regulation of cellular component movement	BP	770	53	0.00470202
GO:0043062	extracellular structure organization	BP	331	27	0.00478574
GO:0048844	artery morphogenesis	BP	56	8	0.00482676
GO:0016053	organic acid biosynthetic process	BP	268	23	0.00482928
GO:0035235	ionotropic glutamate receptor signaling pathway	BP	24	5	0.00485917
GO:0051905	establishment of pigment granule localization	BP	24	5	0.00485917
GO:0034629	cellular protein complex localization	BP	24	5	0.00485917
GO:0048843	negative regulation of axon extension involved in axon guidance	BP	24	5	0.00485917
GO:0048841	regulation of axon extension involved in axon guidance	BP	34	6	0.00494447
GO:0045666	positive regulation of neuron differentiation	BP	300	25	0.0049546
GO:0030308	negative regulation of cell growth	BP	163	16	0.00496248
GO:0001955	blood vessel maturation	BP	8	3	0.00505262
GO:0048865	stem cell fate commitment	BP	8	3	0.00505262
GO:0072239	metanephric glomerulus vasculature development	BP	8	3	0.00505262
GO:0072033	renal vesicle formation	BP	8	3	0.00505262
GO:0030916	otic vesicle formation	BP	8	3	0.00505262
GO:0060947	cardiac vascular smooth muscle cell differentiation	BP	8	3	0.00505262
GO:0098792	xenophagy	BP	8	3	0.00505262
GO:0048793	pronephros development	BP	8	3	0.00505262
GO:0072497	mesenchymal stem cell differentiation	BP	8	3	0.00505262
GO:0004972	NMDA glutamate receptor activity	MF	8	3	0.00505262
GO:0045778	positive regulation of ossification	BP	81	10	0.00505575
GO:0008328	ionotropic glutamate receptor complex	CC	45	7	0.0050943
GO:0098878	neurotransmitter receptor complex	CC	45	7	0.0050943
GO:0010770	positive regulation of cell morphogenesis involved in differentiation	BP	121	13	0.00510245
GO:0005576	extracellular region	CC	4531	249	0.00513521
GO:0032970	regulation of actin filament-based process	BP	317	26	0.00518588
GO:0042127	regulation of cell proliferation	BP	1482	92	0.00521237
GO:0030031	cell projection assembly	BP	382	30	0.00525739
GO:0002040	sprouting angiogenesis	BP	69	9	0.00532315
GO:0090287	regulation of cellular response to growth factor stimulus	BP	224	20	0.00536783
GO:0005975	carbohydrate metabolic process	BP	550	40	0.00540943
GO:0010033	response to organic substance	BP	2741	158	0.00544141
GO:0005739	mitochondrion	CC	1634	100	0.00547399
GO:0040008	regulation of growth	BP	619	44	0.00547658
GO:1904018	positive regulation of vasculature development	BP	136	14	0.00547742
GO:0005737	cytoplasm	CC	10548	540	0.00550362
GO:0042475	odontogenesis of dentin-containing tooth	BP	82	10	0.00551846
GO:0019637	organophosphate metabolic process	BP	1063	69	0.00557498
GO:0042384	cilium assembly	BP	210	19	0.00569608
GO:0010464	regulation of mesenchymal cell proliferation	BP	35	6	0.00573148
GO:0045667	regulation of osteoblast differentiation	BP	109	12	0.00575591
GO:0045661	regulation of myoblast differentiation	BP	46	7	0.00576687
GO:0048638	regulation of developmental growth	BP	288	24	0.00582285
GO:0042481	regulation of odontogenesis	BP	25	5	0.00583946
GO:0060841	venous blood vessel development	BP	16	4	0.00590022
GO:0060644	mammary gland epithelial cell differentiation	BP	16	4	0.00590022
GO:0030540	female genitalia development	BP	16	4	0.00590022
GO:0001711	endodermal cell fate commitment	BP	16	4	0.00590022
GO:0051173	positive regulation of nitrogen compound metabolic process	BP	1714	104	0.00595203
GO:0009880	embryonic pattern specification	BP	58	8	0.00599269
GO:0048534	hematopoietic or lymphoid organ development	BP	745	51	0.00609202
GO:0030155	regulation of cell adhesion	BP	623	44	0.00612581
GO:0033043	regulation of organelle organization	BP	977	64	0.00613041
GO:0030902	hindbrain development	BP	138	14	0.00622428
GO:0051960	regulation of nervous system development	BP	746	51	0.00624796
GO:0051493	regulation of cytoskeleton organization	BP	404	31	0.00640953
GO:0060350	endochondral bone morphogenesis	BP	47	7	0.00650364
GO:0035054	embryonic heart tube anterior/posterior pattern specification	BP	3	2	0.00659825
GO:0060129	thyroid-stimulating hormone-secreting cell differentiation	BP	3	2	0.00659825
GO:0010159	specification of organ position	BP	3	2	0.00659825
GO:0072190	ureter urothelium development	BP	3	2	0.00659825
GO:0021569	rhombomere 3 development	BP	3	2	0.00659825
GO:0060435	bronchiole development	BP	3	2	0.00659825
GO:0035880	embryonic nail plate morphogenesis	BP	3	2	0.00659825
GO:0038086	VEGF-activated platelet-derived growth factor receptor signaling pathway	BP	3	2	0.00659825
GO:0038091	positive regulation of cell proliferation by VEGF-activated platelet derived growth factor receptor signaling pathway	BP	3	2	0.00659825
GO:0072275	metanephric glomerulus morphogenesis	BP	3	2	0.00659825
GO:0072276	metanephric glomerulus vasculature morphogenesis	BP	3	2	0.00659825
GO:0072277	metanephric glomerular capillary formation	BP	3	2	0.00659825
GO:0072092	ureteric bud invasion	BP	3	2	0.00659825
GO:0035290	trunk segmentation	BP	3	2	0.00659825
GO:0036484	trunk neural crest cell migration	BP	3	2	0.00659825
GO:0036486	ventral trunk neural crest cell migration	BP	3	2	0.00659825
GO:0014034	neural crest cell fate commitment	BP	3	2	0.00659825
GO:0003163	sinoatrial node development	BP	3	2	0.00659825
GO:0060921	sinoatrial node cell differentiation	BP	3	2	0.00659825
GO:0001732	formation of cytoplasmic translation initiation complex	BP	3	2	0.00659825
GO:0060912	cardiac cell fate specification	BP	3	2	0.00659825
GO:0007231	osmosensory signaling pathway	BP	3	2	0.00659825
GO:0005850	eukaryotic translation initiation factor 2 complex	CC	3	2	0.00659825
GO:0030895	apolipoprotein B mRNA editing enzyme complex	CC	3	2	0.00659825
GO:0047374	methylumbelliferyl-acetate deacetylase activity	MF	3	2	0.00659825
GO:0005111	type 2 fibroblast growth factor receptor binding	MF	3	2	0.00659825
GO:0003987	acetate-CoA ligase activity	MF	3	2	0.00659825
GO:0010470	regulation of gastrulation	BP	36	6	0.00660609
GO:0030111	regulation of Wnt signaling pathway	BP	307	25	0.00660691
GO:0016202	regulation of striated muscle tissue development	BP	111	12	0.00664661
GO:0030178	negative regulation of Wnt signaling pathway	BP	198	18	0.00667305
GO:0007420	brain development	BP	661	46	0.00669178
GO:0061564	axon development	BP	439	33	0.00679229
GO:0010646	regulation of cell communication	BP	2933	167	0.00680856
GO:0007167	enzyme linked receptor protein signaling pathway	BP	946	62	0.00685243
GO:0060322	head development	BP	697	48	0.00687231
GO:0045935	positive regulation of nucleobase-containing compound metabolic process	BP	1610	98	0.00689992
GO:0090100	positive regulation of transmembrane receptor protein serine/threonine kinase signaling pathway	BP	98	11	0.0069463
GO:0051875	pigment granule localization	BP	26	5	0.00695107
GO:0033598	mammary gland epithelial cell proliferation	BP	26	5	0.00695107
GO:0045992	negative regulation of embryonic development	BP	26	5	0.00695107
GO:0051491	positive regulation of filopodium assembly	BP	26	5	0.00695107
GO:1902668	negative regulation of axon guidance	BP	26	5	0.00695107
GO:0005104	fibroblast growth factor receptor binding	MF	26	5	0.00695107
GO:0060284	regulation of cell development	BP	768	52	0.00696048
GO:0006643	membrane lipid metabolic process	BP	199	18	0.00702057
GO:0044782	cilium organization	BP	230	20	0.00714826
GO:0051145	smooth muscle cell differentiation	BP	48	7	0.00730818
GO:0043022	ribosome binding	MF	48	7	0.00730818
GO:0016553	base conversion or substitution editing	BP	9	3	0.00731208
GO:0032055	negative regulation of translation in response to stress	BP	9	3	0.00731208
GO:0003413	chondrocyte differentiation involved in endochondral bone morphogenesis	BP	9	3	0.00731208
GO:0001714	endodermal cell fate specification	BP	9	3	0.00731208
GO:0042473	outer ear morphogenesis	BP	9	3	0.00731208
GO:2000543	positive regulation of gastrulation	BP	9	3	0.00731208
GO:0035542	regulation of SNARE complex assembly	BP	9	3	0.00731208
GO:0016832	aldehyde-lyase activity	MF	9	3	0.00731208
GO:0016783	sulfurtransferase activity	MF	9	3	0.00731208
GO:0050795	regulation of behavior	BP	60	8	0.007361
GO:0021953	central nervous system neuron differentiation	BP	170	16	0.0073922
GO:0005740	mitochondrial envelope	CC	700	48	0.00742238
GO:0002076	osteoblast development	BP	17	4	0.0074285
GO:0042693	muscle cell fate commitment	BP	17	4	0.0074285
GO:0036303	lymph vessel morphogenesis	BP	17	4	0.0074285
GO:0048486	parasympathetic nervous system development	BP	17	4	0.0074285
GO:0048532	anatomical structure arrangement	BP	17	4	0.0074285
GO:0061387	regulation of extent of cell growth	BP	99	11	0.00748787
GO:0045843	negative regulation of striated muscle tissue development	BP	37	6	0.00757357
GO:1902743	regulation of lamellipodium organization	BP	37	6	0.00757357
GO:0005109	frizzled binding	MF	37	6	0.00757357
GO:0048634	regulation of muscle organ development	BP	113	12	0.00764262
GO:0000313	organellar ribosome	CC	73	9	0.00770717
GO:0005761	mitochondrial ribosome	CC	73	9	0.00770717
GO:0030516	regulation of axon extension	BP	86	10	0.00770855
GO:1901135	carbohydrate derivative metabolic process	BP	1207	76	0.00772581
GO:1901342	regulation of vasculature development	BP	232	20	0.00783888
GO:0048666	neuron development	BP	935	61	0.00799673
GO:1905114	cell surface receptor signaling pathway involved in cell-cell signaling	BP	529	38	0.00799822
GO:0042733	embryonic digit morphogenesis	BP	61	8	0.00812745
GO:0006760	folic acid-containing compound metabolic process	BP	27	5	0.00820241
GO:0010591	regulation of lamellipodium assembly	BP	27	5	0.00820241
GO:0001103	RNA polymerase II repressing transcription factor binding	MF	27	5	0.00820241
GO:0008066	glutamate receptor activity	MF	27	5	0.00820241
GO:0031967	organelle envelope	CC	1100	70	0.00822106
GO:0051489	regulation of filopodium assembly	BP	38	6	0.00863913
GO:1902667	regulation of axon guidance	BP	38	6	0.00863913
GO:0003690	double-stranded DNA binding	MF	777	52	0.00864714
GO:0000975	regulatory region DNA binding	MF	831	55	0.00873031
GO:0001067	regulatory region nucleic acid binding	MF	832	55	0.00893192
GO:0031975	envelope	CC	1105	70	0.00907917
GO:0010927	cellular component assembly involved in morphogenesis	BP	299	24	0.00909897
GO:0071229	cellular response to acid chemical	BP	159	15	0.00912055
GO:0003341	cilium movement	BP	50	7	0.00913476
GO:0045445	myoblast differentiation	BP	75	9	0.00916817
GO:0005230	extracellular ligand-gated ion channel activity	MF	75	9	0.00916817
GO:0090407	organophosphate biosynthetic process	BP	551	39	0.00917475
GO:0048557	embryonic digestive tract morphogenesis	BP	18	4	0.0091961
GO:0005112	Notch binding	MF	18	4	0.0091961
GO:0048870	cell motility	BP	1309	81	0.00922322
GO:0051674	localization of cell	BP	1309	81	0.00922322
GO:0001823	mesonephros development	BP	102	11	0.00931155
GO:0044432	endoplasmic reticulum part	CC	1163	73	0.00958987
GO:0050770	regulation of axonogenesis	BP	160	15	0.00963542
GO:0001656	metanephros development	BP	89	10	0.00974989
GO:0060428	lung epithelium development	BP	39	6	0.0098079
GO:0048635	negative regulation of muscle organ development	BP	39	6	0.0098079
GO:0021872	forebrain generation of neurons	BP	63	8	0.00983786
GO:0031016	pancreas development	BP	76	9	0.00997278
GO:0048340	paraxial mesoderm morphogenesis	BP	10	3	0.010079
GO:0032836	glomerular basement membrane development	BP	10	3	0.010079
GO:0003211	cardiac ventricle formation	BP	10	3	0.010079
GO:0048570	notochord morphogenesis	BP	10	3	0.010079
GO:0071600	otic vesicle morphogenesis	BP	10	3	0.010079
GO:0010454	negative regulation of cell fate commitment	BP	10	3	0.010079
GO:0015215	nucleotide transmembrane transporter activity	MF	10	3	0.010079
GO:0039706	co-receptor binding	MF	10	3	0.010079
GO:0001755	neural crest cell migration	BP	51	7	0.0101639
GO:0050922	negative regulation of chemotaxis	BP	51	7	0.0101639
GO:0003743	translation initiation factor activity	MF	51	7	0.0101639
GO:2000145	regulation of cell motility	BP	713	48	0.0102536
GO:0016055	Wnt signaling pathway	BP	469	34	0.010265
GO:0198738	cell-cell signaling by wnt	BP	470	34	0.010578
GO:0010720	positive regulation of cell development	BP	436	32	0.0105867
GO:0007219	Notch signaling pathway	BP	162	15	0.0107339
GO:0030335	positive regulation of cell migration	BP	386	29	0.0107699
GO:0008652	cellular amino acid biosynthetic process	BP	64	8	0.010787
GO:0071310	cellular response to organic substance	BP	2134	124	0.0108496
GO:0008406	gonad development	BP	208	18	0.0108541
GO:0009268	response to pH	BP	40	6	0.0110849
GO:0007160	cell-matrix adhesion	BP	193	17	0.0110878
GO:0060317	cardiac epithelial to mesenchymal transition	BP	29	5	0.0111565
GO:0010092	specification of animal organ identity	BP	29	5	0.0111565
GO:0060441	epithelial tube branching involved in lung morphogenesis	BP	29	5	0.0111565
GO:0010769	regulation of cell morphogenesis involved in differentiation	BP	256	21	0.0112057
GO:0044342	type B pancreatic cell proliferation	BP	19	4	0.0112164
GO:0046037	GMP metabolic process	BP	19	4	0.0112164
GO:0000145	exocyst	CC	19	4	0.0112164
GO:0005216	ion channel activity	MF	421	31	0.0112472
GO:0051495	positive regulation of cytoskeleton organization	BP	178	16	0.0112503
GO:0016477	cell migration	BP	1190	74	0.0112517
GO:0071495	cellular response to endogenous stimulus	BP	1153	72	0.0112532
GO:0050918	positive chemotaxis	BP	52	7	0.0112749
GO:1902117	positive regulation of organelle assembly	BP	52	7	0.0112749
GO:0090090	negative regulation of canonical Wnt signaling pathway	BP	163	15	0.0113188
GO:0036064	ciliary basal body	CC	91	10	0.0113239
GO:0006357	regulation of transcription from RNA polymerase II promoter	BP	1794	106	0.0116306
GO:0060249	anatomical structure homeostasis	BP	355	27	0.0116653
GO:0070588	calcium ion transmembrane transport	BP	257	21	0.0116748
GO:1901607	alpha-amino acid biosynthetic process	BP	65	8	0.0118021
GO:0044212	transcription regulatory region DNA binding	MF	828	54	0.0122074
GO:0045664	regulation of neuron differentiation	BP	544	38	0.0122095
GO:0031667	response to nutrient levels	BP	390	29	0.0122785
GO:0032535	regulation of cellular component size	BP	340	26	0.0123308
GO:0042803	protein homodimerization activity	MF	703	47	0.0123563
GO:0044344	cellular response to fibroblast growth factor stimulus	BP	135	13	0.0124299
GO:0046530	photoreceptor cell differentiation	BP	53	7	0.0124712
GO:0072210	metanephric nephron development	BP	41	6	0.0124751
GO:0001754	eye photoreceptor cell differentiation	BP	41	6	0.0124751
GO:0003006	developmental process involved in reproduction	BP	615	42	0.0125269
GO:0042594	response to starvation	BP	150	14	0.0125768
GO:0033993	response to lipid	BP	830	54	0.0127515
GO:0006772	thiamine metabolic process	BP	4	2	0.0127796
GO:0090261	positive regulation of inclusion body assembly	BP	4	2	0.0127796
GO:0097029	mature conventional dendritic cell differentiation	BP	4	2	0.0127796
GO:0043622	cortical microtubule organization	BP	4	2	0.0127796
GO:0003241	growth involved in heart morphogenesis	BP	4	2	0.0127796
GO:0014028	notochord formation	BP	4	2	0.0127796
GO:0021913	regulation of transcription from RNA polymerase II promoter involved in ventral spinal cord interneuron specification	BP	4	2	0.0127796
GO:2000741	positive regulation of mesenchymal stem cell differentiation	BP	4	2	0.0127796
GO:0009298	GDP-mannose biosynthetic process	BP	4	2	0.0127796
GO:0003219	cardiac right ventricle formation	BP	4	2	0.0127796
GO:0014054	positive regulation of gamma-aminobutyric acid secretion	BP	4	2	0.0127796
GO:0090170	regulation of Golgi inheritance	BP	4	2	0.0127796
GO:0072093	metanephric renal vesicle formation	BP	4	2	0.0127796
GO:0097490	sympathetic neuron projection extension	BP	4	2	0.0127796
GO:0097491	sympathetic neuron projection guidance	BP	4	2	0.0127796
GO:1901166	neural crest cell migration involved in autonomic nervous system development	BP	4	2	0.0127796
GO:0042662	negative regulation of mesodermal cell fate specification	BP	4	2	0.0127796
GO:0043219	lateral loop	CC	4	2	0.0127796
GO:0004771	sterol esterase activity	MF	4	2	0.0127796
GO:0030023	extracellular matrix constituent conferring elasticity	MF	4	2	0.0127796
GO:0031852	mu-type opioid receptor binding	MF	4	2	0.0127796
GO:0050501	hyaluronan synthase activity	MF	4	2	0.0127796
GO:0016833	oxo-acid-lyase activity	MF	4	2	0.0127796
GO:0001515	opioid peptide activity	MF	4	2	0.0127796
GO:0005105	type 1 fibroblast growth factor receptor binding	MF	4	2	0.0127796
GO:0004582	dolichyl-phosphate beta-D-mannosyltransferase activity	MF	4	2	0.0127796
GO:0003839	gamma-glutamylcyclotransferase activity	MF	4	2	0.0127796
GO:0023051	regulation of signaling	BP	2984	167	0.0127919
GO:0060325	face morphogenesis	BP	30	5	0.0128745
GO:0030097	hemopoiesis	BP	705	47	0.0129549
GO:0050769	positive regulation of neurogenesis	BP	375	28	0.0130247
GO:0045637	regulation of myeloid cell differentiation	BP	181	16	0.0130507
GO:0008543	fibroblast growth factor receptor signaling pathway	BP	107	11	0.01309
GO:0031902	late endosome membrane	CC	107	11	0.01309
GO:0006650	glycerophospholipid metabolic process	BP	276	22	0.0130915
GO:0051272	positive regulation of cellular component movement	BP	409	30	0.0131302
GO:0040012	regulation of locomotion	BP	742	49	0.0133323
GO:0002043	blood vessel endothelial cell proliferation involved in sprouting angiogenesis	BP	11	3	0.0133731
GO:0060433	bronchus development	BP	11	3	0.0133731
GO:1904338	regulation of dopaminergic neuron differentiation	BP	11	3	0.0133731
GO:1903358	regulation of Golgi organization	BP	11	3	0.0133731
GO:0035413	positive regulation of catenin import into nucleus	BP	11	3	0.0133731
GO:2001028	positive regulation of endothelial cell chemotaxis	BP	11	3	0.0133731
GO:0035089	establishment of apical/basal cell polarity	BP	11	3	0.0133731
GO:0001845	phagolysosome assembly	BP	11	3	0.0133731
GO:0006662	glycerol ether metabolic process	BP	11	3	0.0133731
GO:0019211	phosphatase activator activity	MF	11	3	0.0133731
GO:0023014	signal transduction by protein phosphorylation	BP	887	57	0.0134783
GO:1901889	negative regulation of cell junction assembly	BP	20	4	0.0135016
GO:0072087	renal vesicle development	BP	20	4	0.0135016
GO:0009605	response to external stimulus	BP	1996	116	0.0135586
GO:0098588	bounding membrane of organelle	CC	1709	101	0.0135748
GO:0048583	regulation of response to stimulus	BP	3503	193	0.0135778
GO:0032787	monocarboxylic acid metabolic process	BP	548	38	0.0135974
GO:0001666	response to hypoxia	BP	277	22	0.0136049
GO:0045137	development of primary sexual characteristics	BP	213	18	0.013612
GO:0009719	response to endogenous stimulus	BP	1501	90	0.0137162
GO:2000027	regulation of organ morphogenesis	BP	245	20	0.0137552
GO:0005881	cytoplasmic microtubule	CC	54	7	0.0137563
GO:0032879	regulation of localization	BP	2384	136	0.0138013
GO:0046486	glycerolipid metabolic process	BP	377	28	0.0139012
GO:0001078	transcriptional repressor activity RNA polymerase II core promoter proximal region sequence-specific binding	MF	108	11	0.013968
GO:0070838	divalent metal ion transport	BP	411	30	0.0139719
GO:0001709	cell fate determination	BP	42	6	0.0139832
GO:0048806	genitalia development	BP	42	6	0.0139832
GO:0048483	autonomic nervous system development	BP	42	6	0.0139832
GO:0090102	cochlea development	BP	42	6	0.0139832
GO:0043542	endothelial cell migration	BP	152	14	0.0140036
GO:0050772	positive regulation of axonogenesis	BP	67	8	0.0140406
GO:0021954	central nervous system neuron development	BP	67	8	0.0140406
GO:0043254	regulation of protein complex assembly	BP	361	27	0.014274
GO:0008134	transcription factor binding	MF	498	35	0.01444
GO:0022836	gated channel activity	MF	328	25	0.0144654
GO:0051128	regulation of cellular component organization	BP	2194	126	0.0145328
GO:1901700	response to oxygen-containing compound	BP	1411	85	0.0147098
GO:0003209	cardiac atrium morphogenesis	BP	31	5	0.0147627
GO:0003016	respiratory system process	BP	31	5	0.0147627
GO:0060603	mammary gland duct morphogenesis	BP	31	5	0.0147627
GO:0003401	axis elongation	BP	31	5	0.0147627
GO:0005184	neuropeptide hormone activity	MF	31	5	0.0147627
GO:0046660	female sex differentiation	BP	109	11	0.0148897
GO:0001935	endothelial cell proliferation	BP	109	11	0.0148897
GO:0051146	striated muscle cell differentiation	BP	231	19	0.014932
GO:0035326	enhancer binding	MF	95	10	0.0150397
GO:0002573	myeloid leukocyte differentiation	BP	184	16	0.0150688
GO:0021879	forebrain neuron differentiation	BP	55	7	0.0151334
GO:0030032	lamellipodium assembly	BP	55	7	0.0151334
GO:0005231	excitatory extracellular ligand-gated ion channel activity	MF	55	7	0.0151334
GO:0072511	divalent inorganic cation transport	BP	414	30	0.0153155
GO:0042493	response to drug	BP	397	29	0.0153278
GO:0006366	transcription from RNA polymerase II promoter	BP	1986	115	0.015419
GO:0007411	axon guidance	BP	216	18	0.0155141
GO:0002520	immune system development	BP	786	51	0.0159193
GO:0005788	endoplasmic reticulum lumen	CC	201	17	0.0160578
GO:0048103	somatic stem cell division	BP	21	4	0.0160622
GO:0005605	basal lamina	CC	21	4	0.0160622
GO:0003279	cardiac septum development	BP	96	10	0.0160961
GO:0070374	positive regulation of ERK1 and ERK2 cascade	BP	170	15	0.0161431
GO:0097485	neuron projection guidance	BP	217	18	0.0161922
GO:0008654	phospholipid biosynthetic process	BP	217	18	0.0161922
GO:2000147	positive regulation of cell motility	BP	399	29	0.0163024
GO:0044441	ciliary part	CC	332	25	0.0165839
GO:0050767	regulation of neurogenesis	BP	662	44	0.0165968
GO:0051962	positive regulation of nervous system development	BP	434	31	0.0166822
GO:0030900	forebrain development	BP	349	26	0.0167121
GO:0032735	positive regulation of interleukin-12 production	BP	32	5	0.0168276
GO:0038066	p38MAPK cascade	BP	32	5	0.0168276
GO:0048333	mesodermal cell differentiation	BP	32	5	0.0168276
GO:0017145	stem cell division	BP	32	5	0.0168276
GO:0046471	phosphatidylglycerol metabolic process	BP	32	5	0.0168276
GO:0007154	cell communication	BP	6089	320	0.0168515
GO:0048675	axon extension	BP	111	11	0.0168696
GO:0032956	regulation of actin cytoskeleton organization	BP	283	22	0.0170305
GO:0030316	osteoclast differentiation	BP	83	9	0.0171719
GO:0001657	ureteric bud development	BP	97	10	0.0172064
GO:0043649	dicarboxylic acid catabolic process	BP	12	3	0.0172079
GO:0060272	embryonic skeletal joint morphogenesis	BP	12	3	0.0172079
GO:2001053	regulation of mesenchymal cell apoptotic process	BP	12	3	0.0172079
GO:0070129	regulation of mitochondrial translation	BP	12	3	0.0172079
GO:0045779	negative regulation of bone resorption	BP	12	3	0.0172079
GO:0001771	immunological synapse formation	BP	12	3	0.0172079
GO:0003207	cardiac chamber formation	BP	12	3	0.0172079
GO:0002192	IRES-dependent translational initiation	BP	12	3	0.0172079
GO:0030859	polarized epithelial cell differentiation	BP	12	3	0.0172079
GO:0007351	tripartite regional subdivision	BP	12	3	0.0172079
GO:0008595	anterior/posterior axis specification embryo	BP	12	3	0.0172079
GO:0016884	carbon-nitrogen ligase activity with glutamine as amido-N-donor	MF	12	3	0.0172079
GO:0004385	guanylate kinase activity	MF	12	3	0.0172079
GO:0072073	kidney epithelium development	BP	141	13	0.0173515
GO:0071774	response to fibroblast growth factor	BP	141	13	0.0173515
GO:0031513	nonmotile primary cilium	CC	141	13	0.0173515
GO:0016239	positive regulation of macroautophagy	BP	44	6	0.0173714
GO:0030334	regulation of cell migration	BP	664	44	0.0173899
GO:0090092	regulation of transmembrane receptor protein serine/threonine kinase signaling pathway	BP	203	17	0.0175359
GO:0022838	substrate-specific channel activity	MF	436	31	0.0176792
GO:0032271	regulation of protein polymerization	BP	172	15	0.0177765
GO:0009064	glutamine family amino acid metabolic process	BP	70	8	0.0179561
GO:0048771	tissue remodeling	BP	142	13	0.0182977
GO:0036293	response to decreased oxygen levels	BP	285	22	0.0183118
GO:0016758	transferase activity transferring hexosyl groups	MF	204	17	0.0183133
GO:0009991	response to extracellular stimulus	BP	420	30	0.0183135
GO:0072163	mesonephric epithelium development	BP	98	10	0.0183724
GO:0072164	mesonephric tubule development	BP	98	10	0.0183724
GO:0051153	regulation of striated muscle cell differentiation	BP	84	9	0.0184475
GO:0006644	phospholipid metabolic process	BP	386	28	0.0184498
GO:1901137	carbohydrate derivative biosynthetic process	BP	739	48	0.0186297
GO:0046474	glycerophospholipid biosynthetic process	BP	173	15	0.0186391
GO:0072012	glomerulus vasculature development	BP	22	4	0.0189076
GO:0043457	regulation of cellular respiration	BP	22	4	0.0189076
GO:0021854	hypothalamus development	BP	22	4	0.0189076
GO:0032402	melanosome transport	BP	22	4	0.0189076
GO:0045662	negative regulation of myoblast differentiation	BP	22	4	0.0189076
GO:0060351	cartilage development involved in endochondral bone morphogenesis	BP	22	4	0.0189076
GO:0002577	regulation of antigen processing and presentation	BP	22	4	0.0189076
GO:0035268	protein mannosylation	BP	22	4	0.0189076
GO:0007254	JNK cascade	BP	189	16	0.0189606
GO:0010594	regulation of endothelial cell migration	BP	113	11	0.0190397
GO:0061512	protein localization to cilium	BP	33	5	0.0190754
GO:0042558	pteridine-containing compound metabolic process	BP	33	5	0.0190754
GO:0006506	GPI anchor biosynthetic process	BP	33	5	0.0190754
GO:0016235	aggresome	CC	33	5	0.0190754
GO:0045211	postsynaptic membrane	CC	205	17	0.019117
GO:0010976	positive regulation of neuron projection development	BP	221	18	0.0191382
GO:0043392	negative regulation of DNA binding	BP	45	6	0.0192602
GO:0009966	regulation of signal transduction	BP	2646	148	0.0193741
GO:0008306	associative learning	BP	71	8	0.0194196
GO:0097581	lamellipodium organization	BP	71	8	0.0194196
GO:0007218	neuropeptide signaling pathway	BP	99	10	0.0195953
GO:0051253	negative regulation of RNA metabolic process	BP	1203	73	0.0196773
GO:0043648	dicarboxylic acid metabolic process	BP	85	9	0.0197904
GO:0006909	phagocytosis	BP	238	19	0.0198133
GO:0080135	regulation of cellular response to stress	BP	563	38	0.0199895
GO:0014052	regulation of gamma-aminobutyric acid secretion	BP	5	2	0.0206291
GO:0006528	asparagine metabolic process	BP	5	2	0.0206291
GO:1901660	calcium ion export	BP	5	2	0.0206291
GO:0071839	apoptotic process in bone marrow	BP	5	2	0.0206291
GO:0072103	glomerulus vasculature morphogenesis	BP	5	2	0.0206291
GO:0072104	glomerular capillary formation	BP	5	2	0.0206291
GO:0045794	negative regulation of cell volume	BP	5	2	0.0206291
GO:1904340	positive regulation of dopaminergic neuron differentiation	BP	5	2	0.0206291
GO:0051891	positive regulation of cardioblast differentiation	BP	5	2	0.0206291
GO:0060920	cardiac pacemaker cell differentiation	BP	5	2	0.0206291
GO:1901490	regulation of lymphangiogenesis	BP	5	2	0.0206291
GO:0006572	tyrosine catabolic process	BP	5	2	0.0206291
GO:0045542	positive regulation of cholesterol biosynthetic process	BP	5	2	0.0206291
GO:0071865	regulation of apoptotic process in bone marrow	BP	5	2	0.0206291
GO:0071866	negative regulation of apoptotic process in bone marrow	BP	5	2	0.0206291
GO:0060753	regulation of mast cell chemotaxis	BP	5	2	0.0206291
GO:0097070	ductus arteriosus closure	BP	5	2	0.0206291
GO:0060319	primitive erythrocyte differentiation	BP	5	2	0.0206291
GO:0060481	lobar bronchus epithelium development	BP	5	2	0.0206291
GO:0090245	axis elongation involved in somitogenesis	BP	5	2	0.0206291
GO:0072162	metanephric mesenchymal cell differentiation	BP	5	2	0.0206291
GO:1904415	regulation of xenophagy	BP	5	2	0.0206291
GO:1904417	positive regulation of xenophagy	BP	5	2	0.0206291
GO:0060157	urinary bladder development	BP	5	2	0.0206291
GO:0021636	trigeminal nerve morphogenesis	BP	5	2	0.0206291
GO:0021637	trigeminal nerve structural organization	BP	5	2	0.0206291
GO:0075525	viral translational termination-reinitiation	BP	5	2	0.0206291
GO:0030311	poly-N-acetyllactosamine biosynthetic process	BP	5	2	0.0206291
GO:1901679	nucleotide transmembrane transport	BP	5	2	0.0206291
GO:0072047	proximal/distal pattern formation involved in nephron development	BP	5	2	0.0206291
GO:0072081	specification of nephron tubule identity	BP	5	2	0.0206291
GO:0051525	NFAT protein binding	MF	5	2	0.0206291
GO:0017176	phosphatidylinositol N-acetylglucosaminyltransferase activity	MF	5	2	0.0206291
GO:0007165	signal transduction	BP	5623	296	0.0208637
GO:0001841	neural tube formation	BP	100	10	0.0208768
GO:2000243	positive regulation of reproductive process	BP	46	6	0.0212842
GO:0060323	head morphogenesis	BP	34	5	0.0215118
GO:0006505	GPI anchor metabolic process	BP	34	5	0.0215118
GO:0015812	gamma-aminobutyric acid transport	BP	13	3	0.0215907
GO:0032367	intracellular cholesterol transport	BP	13	3	0.0215907
GO:1901213	regulation of transcription from RNA polymerase II promoter involved in heart development	BP	13	3	0.0215907
GO:0014048	regulation of glutamate secretion	BP	13	3	0.0215907
GO:0018904	ether metabolic process	BP	13	3	0.0215907
GO:0042487	regulation of odontogenesis of dentin-containing tooth	BP	13	3	0.0215907
GO:0097152	mesenchymal cell apoptotic process	BP	13	3	0.0215907
GO:0048934	peripheral nervous system neuron differentiation	BP	13	3	0.0215907
GO:0048935	peripheral nervous system neuron development	BP	13	3	0.0215907
GO:0036445	neuronal stem cell division	BP	13	3	0.0215907
GO:0055057	neuroblast division	BP	13	3	0.0215907
GO:0046710	GDP metabolic process	BP	13	3	0.0215907
GO:0061162	establishment of monopolar cell polarity	BP	13	3	0.0215907
GO:0016918	retinal binding	MF	13	3	0.0215907
GO:0015605	organophosphate ester transmembrane transporter activity	MF	13	3	0.0215907
GO:0001658	branching involved in ureteric bud morphogenesis	BP	59	7	0.0216256
GO:1904888	cranial skeletal system development	BP	59	7	0.0216256
GO:0051716	cellular response to stimulus	BP	6756	351	0.0217882
GO:0001945	lymph vessel development	BP	23	4	0.0220457
GO:0032401	establishment of melanosome localization	BP	23	4	0.0220457
GO:0036003	positive regulation of transcription from RNA polymerase II promoter in response to stress	BP	23	4	0.0220457
GO:0016052	carbohydrate catabolic process	BP	146	13	0.0224756
GO:0042221	response to chemical	BP	4014	216	0.0230715
GO:2000113	negative regulation of cellular macromolecule biosynthetic process	BP	1288	77	0.0230766
GO:0040017	positive regulation of locomotion	BP	411	29	0.023234
GO:0032651	regulation of interleukin-1 beta production	BP	47	6	0.0234472
GO:0060563	neuroepithelial cell differentiation	BP	47	6	0.0234472
GO:0010171	body morphogenesis	BP	47	6	0.0234472
GO:0032835	glomerulus development	BP	60	7	0.0235096
GO:0006892	post-Golgi vesicle-mediated transport	BP	60	7	0.0235096
GO:0007611	learning or memory	BP	210	17	0.0235482
GO:0010811	positive regulation of cell-substrate adhesion	BP	102	10	0.0236213
GO:0043604	amide biosynthetic process	BP	732	47	0.0236372
GO:0048871	multicellular organismal homeostasis	BP	326	24	0.0236698
GO:0016023	cytoplasmic membrane-bounded vesicle	CC	1158	70	0.0237834
GO:0003230	cardiac atrium development	BP	35	5	0.0241419
GO:0035088	establishment or maintenance of apical/basal cell polarity	BP	35	5	0.0241419
GO:0061245	establishment or maintenance of bipolar cell polarity	BP	35	5	0.0241419
GO:0030517	negative regulation of axon extension	BP	35	5	0.0241419
GO:0060795	cell fate commitment involved in formation of primary germ layer	BP	35	5	0.0241419
GO:0008135	translation factor activity RNA binding	MF	88	9	0.0242416
GO:0048812	neuron projection morphogenesis	BP	536	36	0.0246241
GO:0090066	regulation of anatomical structure size	BP	466	32	0.0250186
GO:0001046	core promoter sequence-specific DNA binding	MF	103	10	0.025087
GO:0045202	synapse	CC	717	46	0.0252735
GO:0034332	adherens junction organization	BP	118	11	0.0253618
GO:0061437	renal system vasculature development	BP	24	4	0.0254831
GO:0061440	kidney vasculature development	BP	24	4	0.0254831
GO:0050926	regulation of positive chemotaxis	BP	24	4	0.0254831
GO:1900087	positive regulation of G1/S transition of mitotic cell cycle	BP	24	4	0.0254831
GO:0006541	glutamine metabolic process	BP	24	4	0.0254831
GO:0031063	regulation of histone deacetylation	BP	24	4	0.0254831
GO:0038084	vascular endothelial growth factor signaling pathway	BP	24	4	0.0254831
GO:1902745	positive regulation of lamellipodium organization	BP	24	4	0.0254831
GO:0035767	endothelial cell chemotaxis	BP	24	4	0.0254831
GO:0019201	nucleotide kinase activity	MF	24	4	0.0254831
GO:0099023	tethring complex	CC	61	7	0.0255036
GO:0071695	anatomical structure maturation	BP	48	6	0.0257528
GO:0002067	glandular epithelial cell differentiation	BP	48	6	0.0257528
GO:1903507	negative regulation of nucleic acid-templated transcription	BP	1144	69	0.0257536
GO:0045934	negative regulation of nucleobase-containing compound metabolic process	BP	1333	79	0.0257998
GO:0030594	neurotransmitter receptor activity	MF	89	9	0.0258719
GO:0006816	calcium ion transport	BP	363	26	0.0258878
GO:0009611	response to wounding	BP	628	41	0.026128
GO:0010975	regulation of neuron projection development	BP	398	28	0.0262625
GO:0008361	regulation of cell size	BP	165	14	0.0265238
GO:0090036	regulation of protein kinase C signaling	BP	14	3	0.0265241
GO:2000737	negative regulation of stem cell differentiation	BP	14	3	0.0265241
GO:0097499	protein localization to nonmotile primary cilium	BP	14	3	0.0265241
GO:0072498	embryonic skeletal joint development	BP	14	3	0.0265241
GO:0010893	positive regulation of steroid biosynthetic process	BP	14	3	0.0265241
GO:0007501	mesodermal cell fate specification	BP	14	3	0.0265241
GO:0046851	negative regulation of bone remodeling	BP	14	3	0.0265241
GO:0042074	cell migration involved in gastrulation	BP	14	3	0.0265241
GO:0061339	establishment or maintenance of monopolar cell polarity	BP	14	3	0.0265241
GO:0004707	MAP kinase activity	MF	14	3	0.0265241
GO:0030856	regulation of epithelial cell differentiation	BP	119	11	0.0267895
GO:0007224	smoothened signaling pathway	BP	119	11	0.0267895
GO:0031514	motile cilium	CC	119	11	0.0267895
GO:0010718	positive regulation of epithelial to mesenchymal transition	BP	36	5	0.0269702
GO:0001934	positive regulation of protein phosphorylation	BP	868	54	0.0275032
GO:0031325	positive regulation of cellular metabolic process	BP	2756	152	0.0275582
GO:0007569	cell aging	BP	90	9	0.0275783
GO:0046934	phosphatidylinositol-4 5-bisphosphate 3-kinase activity	MF	62	7	0.0276101
GO:0031175	neuron projection development	BP	795	50	0.0278906
GO:0007155	cell adhesion	BP	1683	97	0.0280145
GO:0007492	endoderm development	BP	76	8	0.0280267
GO:0002011	morphogenesis of an epithelial sheet	BP	49	6	0.0282043
GO:0051893	regulation of focal adhesion assembly	BP	49	6	0.0282043
GO:0090109	regulation of cell-substrate junction assembly	BP	49	6	0.0282043
GO:0048593	camera-type eye morphogenesis	BP	105	10	0.0282124
GO:0022612	gland morphogenesis	BP	120	11	0.0282743
GO:0000165	MAPK cascade	BP	851	53	0.02828
GO:0098802	plasma membrane receptor complex	CC	167	14	0.0290148
GO:0010558	negative regulation of macromolecule biosynthetic process	BP	1379	81	0.0290918
GO:0097060	synaptic membrane	CC	265	20	0.029173
GO:0032365	intracellular lipid transport	BP	25	4	0.0292247
GO:0032400	melanosome localization	BP	25	4	0.0292247
GO:0060487	lung epithelial cell differentiation	BP	25	4	0.0292247
GO:0001964	startle response	BP	25	4	0.0292247
GO:0000314	organellar small ribosomal subunit	CC	25	4	0.0292247
GO:0005763	mitochondrial small ribosomal subunit	CC	25	4	0.0292247
GO:0010647	positive regulation of cell communication	BP	1494	87	0.0292426
GO:0007596	blood coagulation	BP	350	25	0.0293188
GO:0048010	vascular endothelial growth factor receptor signaling pathway	BP	91	9	0.0293623
GO:0030534	adult behavior	BP	136	12	0.029367
GO:0060491	regulation of cell projection assembly	BP	136	12	0.029367
GO:0051179	localization	BP	5684	297	0.0293725
GO:0071396	cellular response to lipid	BP	490	33	0.0294351
GO:0008150	biological_process	BP	16672	812	0.0295467
GO:0060411	cardiac septum morphogenesis	BP	63	7	0.0298316
GO:0072089	stem cell proliferation	BP	106	10	0.0298746
GO:0042723	thiamine-containing compound metabolic process	BP	6	2	0.0299741
GO:0061312	BMP signaling pathway involved in heart development	BP	6	2	0.0299741
GO:0045602	negative regulation of endothelial cell differentiation	BP	6	2	0.0299741
GO:0070383	DNA cytosine deamination	BP	6	2	0.0299741
GO:0019800	peptide cross-linking via chondroitin 4-sulfate glycosaminoglycan	BP	6	2	0.0299741
GO:0071676	negative regulation of mononuclear cell migration	BP	6	2	0.0299741
GO:0046600	negative regulation of centriole replication	BP	6	2	0.0299741
GO:0001957	intramembranous ossification	BP	6	2	0.0299741
GO:0036072	direct ossification	BP	6	2	0.0299741
GO:0097411	hypoxia-inducible factor-1alpha signaling pathway	BP	6	2	0.0299741
GO:0071838	cell proliferation in bone marrow	BP	6	2	0.0299741
GO:0032792	negative regulation of CREB transcription factor activity	BP	6	2	0.0299741
GO:0034036	purine ribonucleoside bisphosphate biosynthetic process	BP	6	2	0.0299741
GO:0050428	3'-phosphoadenosine 5'-phosphosulfate biosynthetic process	BP	6	2	0.0299741
GO:0060029	convergent extension involved in organogenesis	BP	6	2	0.0299741
GO:0090205	positive regulation of cholesterol metabolic process	BP	6	2	0.0299741
GO:0071863	regulation of cell proliferation in bone marrow	BP	6	2	0.0299741
GO:0071864	positive regulation of cell proliferation in bone marrow	BP	6	2	0.0299741
GO:0035965	cardiolipin acyl-chain remodeling	BP	6	2	0.0299741
GO:0060482	lobar bronchus development	BP	6	2	0.0299741
GO:2000973	regulation of pro-B cell differentiation	BP	6	2	0.0299741
GO:0014029	neural crest formation	BP	6	2	0.0299741
GO:0046485	ether lipid metabolic process	BP	6	2	0.0299741
GO:1901621	negative regulation of smoothened signaling pathway involved in dorsal/ventral neural tube patterning	BP	6	2	0.0299741
GO:0015860	purine nucleoside transmembrane transport	BP	6	2	0.0299741
GO:0030309	poly-N-acetyllactosamine metabolic process	BP	6	2	0.0299741
GO:0018103	protein C-linked glycosylation	BP	6	2	0.0299741
GO:0018211	peptidyl-tryptophan modification	BP	6	2	0.0299741
GO:0018317	protein C-linked glycosylation via tryptophan	BP	6	2	0.0299741
GO:0018406	protein C-linked glycosylation via 2'-alpha-mannosyl-L-tryptophan	BP	6	2	0.0299741
GO:0005851	eukaryotic translation initiation factor 2B complex	CC	6	2	0.0299741
GO:0008525	phosphatidylcholine transporter activity	MF	6	2	0.0299741
GO:0000295	adenine nucleotide transmembrane transporter activity	MF	6	2	0.0299741
GO:0005346	purine ribonucleotide transmembrane transporter activity	MF	6	2	0.0299741
GO:0097493	structural molecule activity conferring elasticity	MF	6	2	0.0299741
GO:0070728	leucine binding	MF	6	2	0.0299741
GO:2000677	regulation of transcription regulatory region DNA binding	BP	37	5	0.030001
GO:0071622	regulation of granulocyte chemotaxis	BP	37	5	0.030001
GO:0022610	biological adhesion	BP	1689	97	0.0303679
GO:0045892	negative regulation of transcription DNA-templated	BP	1098	66	0.0305825
GO:0010604	positive regulation of macromolecule metabolic process	BP	2766	152	0.0306879
GO:0043231	intracellular membrane-bounded organelle	CC	10794	542	0.0307153
GO:0060420	regulation of heart growth	BP	50	6	0.0308047
GO:0006695	cholesterol biosynthetic process	BP	50	6	0.0308047
GO:0007632	visual behavior	BP	50	6	0.0308047
GO:0016830	carbon-carbon lyase activity	MF	50	6	0.0308047
GO:0044724	single-organism carbohydrate catabolic process	BP	137	12	0.0308487
GO:0015075	ion transmembrane transporter activity	MF	801	50	0.0313238
GO:0050679	positive regulation of epithelial cell proliferation	BP	153	13	0.0314342
GO:0070482	response to oxygen levels	BP	301	22	0.0314613
GO:0005667	transcription factor complex	CC	301	22	0.0314613
GO:0051258	protein polymerization	BP	234	18	0.031613
GO:0006022	aminoglycan metabolic process	BP	169	14	0.0316733
GO:0016337	single organismal cell-cell adhesion	BP	710	45	0.0318704
GO:0001946	lymphangiogenesis	BP	15	3	0.032006
GO:0051895	negative regulation of focal adhesion assembly	BP	15	3	0.032006
GO:0032495	response to muramyl dipeptide	BP	15	3	0.032006
GO:0048569	post-embryonic animal organ development	BP	15	3	0.032006
GO:0031065	positive regulation of histone deacetylation	BP	15	3	0.032006
GO:0048368	lateral mesoderm development	BP	15	3	0.032006
GO:0002579	positive regulation of antigen processing and presentation	BP	15	3	0.032006
GO:2000251	positive regulation of actin cytoskeleton reorganization	BP	15	3	0.032006
GO:1900271	regulation of long-term synaptic potentiation	BP	15	3	0.032006
GO:0060026	convergent extension	BP	15	3	0.032006
GO:0002190	cap-independent translational initiation	BP	15	3	0.032006
GO:0016254	preassembly of GPI anchor in ER membrane	BP	15	3	0.032006
GO:0071782	endoplasmic reticulum tubular network	CC	15	3	0.032006
GO:0033290	eukaryotic 48S preinitiation complex	CC	15	3	0.032006
GO:0030510	regulation of BMP signaling pathway	BP	78	8	0.0321098
GO:0045639	positive regulation of myeloid cell differentiation	BP	78	8	0.0321098
GO:0044700	single organism signaling	BP	6064	315	0.0321396
GO:0043299	leukocyte degranulation	BP	64	7	0.0321705
GO:0048872	homeostasis of number of cells	BP	218	17	0.0321982
GO:0045216	cell-cell junction organization	BP	218	17	0.0321982
GO:0000982	transcription factor activity RNA polymerase II core promoter proximal region sequence-specific binding	MF	336	24	0.0322454
GO:0023056	positive regulation of signaling	BP	1501	87	0.0322741
GO:0043408	regulation of MAPK cascade	BP	656	42	0.0323727
GO:0043010	camera-type eye development	BP	285	21	0.0324476
GO:0050817	coagulation	BP	354	25	0.0329621
GO:0007626	locomotory behavior	BP	186	15	0.0329679
GO:0001936	regulation of endothelial cell proliferation	BP	93	9	0.0331694
GO:0030175	filopodium	CC	93	9	0.0331694
GO:0002886	regulation of myeloid leukocyte mediated immunity	BP	38	5	0.0332376
GO:0035924	cellular response to vascular endothelial growth factor stimulus	BP	38	5	0.0332376
GO:0051445	regulation of meiotic cell cycle	BP	38	5	0.0332376
GO:0005484	SNAP receptor activity	MF	38	5	0.0332376
GO:0097352	autophagosome maturation	BP	26	4	0.0332744
GO:0005980	glycogen catabolic process	BP	26	4	0.0332744
GO:0071470	cellular response to osmotic stress	BP	26	4	0.0332744
GO:0060479	lung cell differentiation	BP	26	4	0.0332744
GO:0051154	negative regulation of striated muscle cell differentiation	BP	26	4	0.0332744
GO:1900744	regulation of p38MAPK cascade	BP	26	4	0.0332744
GO:0090022	regulation of neutrophil chemotaxis	BP	26	4	0.0332744
GO:0035412	regulation of catenin import into nucleus	BP	26	4	0.0332744
GO:0016878	acid-thiol ligase activity	MF	26	4	0.0332744
GO:1902679	negative regulation of RNA biosynthetic process	BP	1160	69	0.033339
GO:0019904	protein domain specific binding	MF	603	39	0.0334065
GO:0031410	cytoplasmic vesicle	CC	1255	74	0.0334159
GO:1902653	secondary alcohol biosynthetic process	BP	51	6	0.0335568
GO:0010812	negative regulation of cell-substrate adhesion	BP	51	6	0.0335568
GO:1903391	regulation of adherens junction organization	BP	51	6	0.0335568
GO:0007599	hemostasis	BP	355	25	0.0339241
GO:0023052	signaling	BP	6071	315	0.0339592
GO:0034333	adherens junction assembly	BP	79	8	0.0342961
GO:0008344	adult locomotory behavior	BP	79	8	0.0342961
GO:0051172	negative regulation of nitrogen compound metabolic process	BP	1467	85	0.0343114
GO:0048639	positive regulation of developmental growth	BP	155	13	0.0344113
GO:0097458	neuron part	CC	1276	75	0.0344188
GO:0097708	intracellular vesicle	CC	1257	74	0.0344379
GO:0055017	cardiac muscle tissue growth	BP	65	7	0.0346287
GO:0052813	phosphatidylinositol bisphosphate kinase activity	MF	65	7	0.0346287
GO:0050896	response to stimulus	BP	8081	412	0.035008
GO:0098794	postsynapse	CC	339	24	0.0352272
GO:0044463	cell projection part	CC	919	56	0.0353286
GO:0044712	single-organism catabolic process	BP	826	51	0.0353831
GO:0044271	cellular nitrogen compound biosynthetic process	BP	4852	255	0.0359381
GO:0010043	response to zinc ion	BP	52	6	0.0364631
GO:0046847	filopodium assembly	BP	52	6	0.0364631
GO:0007015	actin filament organization	BP	323	23	0.0365529
GO:0001942	hair follicle development	BP	80	8	0.0365811
GO:0022404	molting cycle process	BP	80	8	0.0365811
GO:0022405	hair cycle process	BP	80	8	0.0365811
GO:0046620	regulation of organ growth	BP	80	8	0.0365811
GO:0060170	ciliary membrane	CC	80	8	0.0365811
GO:0005539	glycosaminoglycan binding	MF	205	16	0.0366569
GO:0043300	regulation of leukocyte degranulation	BP	39	5	0.0366831
GO:0050873	brown fat cell differentiation	BP	39	5	0.0366831
GO:0050919	negative chemotaxis	BP	39	5	0.0366831
GO:0045668	negative regulation of osteoblast differentiation	BP	39	5	0.0366831
GO:0005085	guanyl-nucleotide exchange factor activity	MF	306	22	0.0367605
GO:0010595	positive regulation of endothelial cell migration	BP	66	7	0.0372084
GO:0007032	endosome organization	BP	66	7	0.0372084
GO:0008194	UDP-glycosyltransferase activity	MF	141	12	0.0373143
GO:0000002	mitochondrial genome maintenance	BP	27	4	0.0376348
GO:0009251	glucan catabolic process	BP	27	4	0.0376348
GO:0044247	cellular polysaccharide catabolic process	BP	27	4	0.0376348
GO:0008045	motor neuron axon guidance	BP	27	4	0.0376348
GO:0086004	regulation of cardiac muscle cell contraction	BP	27	4	0.0376348
GO:0050706	regulation of interleukin-1 beta secretion	BP	27	4	0.0376348
GO:0010453	regulation of cell fate commitment	BP	27	4	0.0376348
GO:0006658	phosphatidylserine metabolic process	BP	27	4	0.0376348
GO:0005622	intracellular	CC	13930	687	0.0379564
GO:0070925	organelle assembly	BP	609	39	0.0380049
GO:0061298	retina vasculature development in camera-type eye	BP	16	3	0.0380304
GO:1903392	negative regulation of adherens junction organization	BP	16	3	0.0380304
GO:0072224	metanephric glomerulus development	BP	16	3	0.0380304
GO:0033189	response to vitamin A	BP	16	3	0.0380304
GO:1900745	positive regulation of p38MAPK cascade	BP	16	3	0.0380304
GO:2000380	regulation of mesoderm development	BP	16	3	0.0380304
GO:0045408	regulation of interleukin-6 biosynthetic process	BP	16	3	0.0380304
GO:0010592	positive regulation of lamellipodium assembly	BP	16	3	0.0380304
GO:0035269	protein O-linked mannosylation	BP	16	3	0.0380304
GO:0051127	positive regulation of actin nucleation	BP	16	3	0.0380304
GO:0070993	translation preinitiation complex	CC	16	3	0.0380304
GO:0051480	regulation of cytosolic calcium ion concentration	BP	273	20	0.0380873
GO:0031226	intrinsic component of plasma membrane	CC	1668	95	0.0382718
GO:0015748	organophosphate ester transport	BP	81	8	0.0389663
GO:0072527	pyrimidine-containing compound metabolic process	BP	81	8	0.0389663
GO:0048640	negative regulation of developmental growth	BP	81	8	0.0389663
GO:0010508	positive regulation of autophagy	BP	81	8	0.0389663
GO:0031503	protein complex localization	BP	111	10	0.0392313
GO:0060627	regulation of vesicle-mediated transport	BP	413	28	0.0393695
GO:0046983	protein dimerization activity	MF	1133	67	0.0394968
GO:0050905	neuromuscular process	BP	96	9	0.0394985
GO:0090398	cellular senescence	BP	53	6	0.0395259
GO:0045453	bone resorption	BP	53	6	0.0395259
GO:0045600	positive regulation of fat cell differentiation	BP	53	6	0.0395259
GO:0021515	cell differentiation in spinal cord	BP	53	6	0.0395259
GO:0051785	positive regulation of nuclear division	BP	53	6	0.0395259
GO:0031201	SNARE complex	CC	53	6	0.0395259
GO:0031988	membrane-bounded vesicle	CC	3550	190	0.0397563
GO:0031224	intrinsic component of membrane	CC	5456	284	0.0397864
GO:0001938	positive regulation of endothelial cell proliferation	BP	67	7	0.0399113
GO:0005488	binding	MF	13201	653	0.0399211
GO:0043547	positive regulation of GTPase activity	BP	630	40	0.0402584
GO:0048286	lung alveolus development	BP	40	5	0.04034
GO:0042461	photoreceptor cell development	BP	40	5	0.04034
GO:0018279	protein N-linked glycosylation via asparagine	BP	40	5	0.04034
GO:0007517	muscle organ development	BP	344	24	0.0406492
GO:0006101	citrate metabolic process	BP	7	2	0.0406544
GO:1903715	regulation of aerobic respiration	BP	7	2	0.0406544
GO:0009120	deoxyribonucleoside metabolic process	BP	7	2	0.0406544
GO:0043320	natural killer cell degranulation	BP	7	2	0.0406544
GO:0006545	glycine biosynthetic process	BP	7	2	0.0406544
GO:0021902	commitment of neuronal cell to specific neuron type in forebrain	BP	7	2	0.0406544
GO:0032057	negative regulation of translational initiation in response to stress	BP	7	2	0.0406544
GO:0006551	leucine metabolic process	BP	7	2	0.0406544
GO:0014049	positive regulation of glutamate secretion	BP	7	2	0.0406544
GO:0047484	regulation of response to osmotic stress	BP	7	2	0.0406544
GO:0061438	renal system vasculature morphogenesis	BP	7	2	0.0406544
GO:0061439	kidney vasculature morphogenesis	BP	7	2	0.0406544
GO:0048842	positive regulation of axon extension involved in axon guidance	BP	7	2	0.0406544
GO:1902669	positive regulation of axon guidance	BP	7	2	0.0406544
GO:0097264	self proteolysis	BP	7	2	0.0406544
GO:0002606	positive regulation of dendritic cell antigen processing and presentation	BP	7	2	0.0406544
GO:0002069	columnar/cuboidal epithelial cell maturation	BP	7	2	0.0406544
GO:2000542	negative regulation of gastrulation	BP	7	2	0.0406544
GO:0060430	lung saccule development	BP	7	2	0.0406544
GO:0001839	neural plate morphogenesis	BP	7	2	0.0406544
GO:0045198	establishment of epithelial cell apical/basal polarity	BP	7	2	0.0406544
GO:0006538	glutamate catabolic process	BP	7	2	0.0406544
GO:2000049	positive regulation of cell-cell adhesion mediated by cadherin	BP	7	2	0.0406544
GO:0006013	mannose metabolic process	BP	7	2	0.0406544
GO:0090091	positive regulation of extracellular matrix disassembly	BP	7	2	0.0406544
GO:0060982	coronary artery morphogenesis	BP	7	2	0.0406544
GO:0075522	IRES-dependent viral translational initiation	BP	7	2	0.0406544
GO:1901620	regulation of smoothened signaling pathway involved in dorsal/ventral neural tube patterning	BP	7	2	0.0406544
GO:0033278	cell proliferation in midbrain	BP	7	2	0.0406544
GO:0060028	convergent extension involved in axis elongation	BP	7	2	0.0406544
GO:2000601	positive regulation of Arp2/3 complex-mediated actin nucleation	BP	7	2	0.0406544
GO:0045869	negative regulation of single stranded viral RNA replication via double stranded DNA intermediate	BP	7	2	0.0406544
GO:0032593	insulin-responsive compartment	CC	7	2	0.0406544
GO:0071541	eukaryotic translation initiation factor 3 complex eIF3m	CC	7	2	0.0406544
GO:0015216	purine nucleotide transmembrane transporter activity	MF	7	2	0.0406544
GO:0016413	O-acetyltransferase activity	MF	7	2	0.0406544
GO:0003747	translation release factor activity	MF	7	2	0.0406544
GO:0008079	translation termination factor activity	MF	7	2	0.0406544
GO:0004691	cAMP-dependent protein kinase activity	MF	7	2	0.0406544
GO:0050291	sphingosine N-acyltransferase activity	MF	7	2	0.0406544
GO:0044424	intracellular part	CC	13592	671	0.0406693
GO:0043226	organelle	CC	12881	638	0.0408034
GO:0015267	channel activity	MF	468	31	0.0410197
GO:0006807	nitrogen compound metabolic process	BP	6776	348	0.0411767
GO:0009893	positive regulation of metabolic process	BP	2954	160	0.0413264
GO:0098773	skin epidermis development	BP	82	8	0.0414532
GO:0001158	enhancer sequence-specific DNA binding	MF	82	8	0.0414532
GO:0010256	endomembrane system organization	BP	541	35	0.0419832
GO:0022803	passive transmembrane transporter activity	MF	469	31	0.0420082
GO:0055114	oxidation-reduction process	BP	967	58	0.042189
GO:0030823	regulation of cGMP metabolic process	BP	28	4	0.042307
GO:0018146	keratan sulfate biosynthetic process	BP	28	4	0.042307
GO:0035411	catenin import into nucleus	BP	28	4	0.042307
GO:1902808	positive regulation of cell cycle G1/S phase transition	BP	28	4	0.042307
GO:0045197	establishment or maintenance of epithelial cell apical/basal polarity	BP	28	4	0.042307
GO:0040020	regulation of meiotic nuclear division	BP	28	4	0.042307
GO:0098602	single organism cell adhesion	BP	762	47	0.0427081
GO:0030041	actin filament polymerization	BP	160	13	0.0427285
GO:0001706	endoderm formation	BP	54	6	0.0427471
GO:0006023	aminoglycan biosynthetic process	BP	113	10	0.0434828
GO:1903510	mucopolysaccharide metabolic process	BP	113	10	0.0434828
GO:0042060	wound healing	BP	525	34	0.0439775
GO:0001558	regulation of cell growth	BP	382	26	0.044025
GO:0043410	positive regulation of MAPK cascade	BP	471	31	0.0440385
GO:0030204	chondroitin sulfate metabolic process	BP	41	5	0.0442102
GO:0018196	peptidyl-asparagine modification	BP	41	5	0.0442102
GO:0007612	learning	BP	129	11	0.0443791
GO:0003198	epithelial to mesenchymal transition involved in endocardial cushion formation	BP	17	3	0.0445879
GO:0021514	ventral spinal cord interneuron differentiation	BP	17	3	0.0445879
GO:0060850	regulation of transcription involved in cell fate commitment	BP	17	3	0.0445879
GO:1904948	midbrain dopaminergic neuron differentiation	BP	17	3	0.0445879
GO:2000641	regulation of early endosome to late endosome transport	BP	17	3	0.0445879
GO:2000678	negative regulation of transcription regulatory region DNA binding	BP	17	3	0.0445879
GO:0002183	cytoplasmic translational initiation	BP	17	3	0.0445879
GO:2001026	regulation of endothelial cell chemotaxis	BP	17	3	0.0445879
GO:0036148	phosphatidylglycerol acyl-chain remodeling	BP	17	3	0.0445879
GO:0008308	voltage-gated anion channel activity	MF	17	3	0.0445879
GO:0031489	myosin V binding	MF	17	3	0.0445879
GO:0030833	regulation of actin filament polymerization	BP	145	12	0.0446821
GO:0016021	integral component of membrane	CC	5329	277	0.0451084
GO:0022891	substrate-specific transmembrane transporter activity	MF	934	56	0.0455488
GO:0002275	myeloid cell activation involved in immune response	BP	69	7	0.0456933
GO:0007045	cell-substrate adherens junction assembly	BP	69	7	0.0456933
GO:0048041	focal adhesion assembly	BP	69	7	0.0456933
GO:0003151	outflow tract morphogenesis	BP	69	7	0.0456933
GO:0007215	glutamate receptor signaling pathway	BP	69	7	0.0456933
GO:0009132	nucleoside diphosphate metabolic process	BP	114	10	0.0457216
GO:0031982	vesicle	CC	3687	196	0.0460242
GO:0005088	Ras guanyl-nucleotide exchange factor activity	MF	228	17	0.0460574
GO:0032386	regulation of intracellular transport	BP	455	30	0.0460931
GO:0005546	phosphatidylinositol-4 5-bisphosphate binding	MF	55	6	0.0461284
GO:0001701	in utero embryonic development	BP	314	22	0.0465765
GO:0030282	bone mineralization	BP	99	9	0.0466003
GO:1902622	regulation of neutrophil migration	BP	29	4	0.0472911
GO:0033006	regulation of mast cell activation involved in immune response	BP	29	4	0.0472911
GO:0043304	regulation of mast cell degranulation	BP	29	4	0.0472911
GO:0005783	endoplasmic reticulum	CC	1627	92	0.0475751
GO:0050928	negative regulation of positive chemotaxis	BP	1	1	0.0476855
GO:0050760	negative regulation of thymidylate synthase biosynthetic process	BP	1	1	0.0476855
GO:0061580	colon epithelial cell migration	BP	1	1	0.0476855
GO:0070981	L-asparagine biosynthetic process	BP	1	1	0.0476855
GO:0070982	L-asparagine metabolic process	BP	1	1	0.0476855
GO:1903280	negative regulation of calcium:sodium antiporter activity	BP	1	1	0.0476855
GO:0051042	negative regulation of calcium-independent cell-cell adhesion	BP	1	1	0.0476855
GO:0060804	positive regulation of Wnt signaling pathway by BMP signaling pathway	BP	1	1	0.0476855
GO:0048006	antigen processing and presentation endogenous lipid antigen via MHC class Ib	BP	1	1	0.0476855
GO:0090122	cholesterol ester hydrolysis involved in cholesterol transport	BP	1	1	0.0476855
GO:0038115	chemokine (C-C motif) ligand 19 signaling pathway	BP	1	1	0.0476855
GO:0038116	chemokine (C-C motif) ligand 21 signaling pathway	BP	1	1	0.0476855
GO:0097022	lymphocyte migration into lymph node	BP	1	1	0.0476855
GO:2000522	positive regulation of immunological synapse formation	BP	1	1	0.0476855
GO:2000526	positive regulation of glycoprotein biosynthetic process involved in immunological synapse formation	BP	1	1	0.0476855
GO:0070408	carbamoyl phosphate metabolic process	BP	1	1	0.0476855
GO:0070409	carbamoyl phosphate biosynthetic process	BP	1	1	0.0476855
GO:0002881	negative regulation of chronic inflammatory response to non-antigenic stimulus	BP	1	1	0.0476855
GO:0033488	cholesterol biosynthetic process via 24 25-dihydrolanosterol	BP	1	1	0.0476855
GO:0036145	dendritic cell homeostasis	BP	1	1	0.0476855
GO:1901551	negative regulation of endothelial cell development	BP	1	1	0.0476855
GO:1903141	negative regulation of establishment of endothelial barrier	BP	1	1	0.0476855
GO:1905098	negative regulation of guanyl-nucleotide exchange factor activity	BP	1	1	0.0476855
GO:0060034	notochord cell differentiation	BP	1	1	0.0476855
GO:0060035	notochord cell development	BP	1	1	0.0476855
GO:1901731	positive regulation of platelet aggregation	BP	1	1	0.0476855
GO:1902217	erythrocyte apoptotic process	BP	1	1	0.0476855
GO:1902250	regulation of erythrocyte apoptotic process	BP	1	1	0.0476855
GO:1902251	negative regulation of erythrocyte apoptotic process	BP	1	1	0.0476855
GO:0007424	open tracheal system development	BP	1	1	0.0476855
GO:0014822	detection of wounding	BP	1	1	0.0476855
GO:0048567	ectodermal digestive tract morphogenesis	BP	1	1	0.0476855
GO:0048613	embryonic ectodermal digestive tract morphogenesis	BP	1	1	0.0476855
GO:0060446	branching involved in open tracheal system development	BP	1	1	0.0476855
GO:0060461	right lung morphogenesis	BP	1	1	0.0476855
GO:0043181	vacuolar sequestering	BP	1	1	0.0476855
GO:0070094	positive regulation of glucagon secretion	BP	1	1	0.0476855
GO:0040032	post-embryonic body morphogenesis	BP	1	1	0.0476855
GO:0052551	response to defense-related nitric oxide production by other organism involved in symbiotic interaction	BP	1	1	0.0476855
GO:0052565	response to defense-related host nitric oxide production	BP	1	1	0.0476855
GO:0007634	optokinetic behavior	BP	1	1	0.0476855
GO:0021560	abducens nerve development	BP	1	1	0.0476855
GO:0021598	abducens nerve morphogenesis	BP	1	1	0.0476855
GO:0021599	abducens nerve formation	BP	1	1	0.0476855
GO:0021754	facial nucleus development	BP	1	1	0.0476855
GO:1904842	response to nitroglycerin	BP	1	1	0.0476855
GO:1904843	cellular response to nitroglycerin	BP	1	1	0.0476855
GO:1990910	response to hypobaric hypoxia	BP	1	1	0.0476855
GO:1990911	response to psychosocial stress	BP	1	1	0.0476855
GO:0061611	mannose to fructose-6-phosphate metabolic process	BP	1	1	0.0476855
GO:0007522	visceral muscle development	BP	1	1	0.0476855
GO:1904170	regulation of bleb assembly	BP	1	1	0.0476855
GO:1904172	positive regulation of bleb assembly	BP	1	1	0.0476855
GO:0051867	general adaptation syndrome behavioral process	BP	1	1	0.0476855
GO:1901557	response to fenofibrate	BP	1	1	0.0476855
GO:2000656	regulation of apolipoprotein binding	BP	1	1	0.0476855
GO:2000657	negative regulation of apolipoprotein binding	BP	1	1	0.0476855
GO:1903435	positive regulation of constitutive secretory pathway	BP	1	1	0.0476855
GO:0034633	retinol transport	BP	1	1	0.0476855
GO:0046864	isoprenoid transport	BP	1	1	0.0476855
GO:0046865	terpenoid transport	BP	1	1	0.0476855
GO:0010021	amylopectin biosynthetic process	BP	1	1	0.0476855
GO:2000896	amylopectin metabolic process	BP	1	1	0.0476855
GO:0035622	intrahepatic bile duct development	BP	1	1	0.0476855
GO:0060517	epithelial cell proliferation involved in prostatic bud elongation	BP	1	1	0.0476855
GO:0060784	regulation of cell proliferation involved in tissue homeostasis	BP	1	1	0.0476855
GO:0044395	protein targeting to vacuolar membrane	BP	1	1	0.0476855
GO:1900483	regulation of protein targeting to vacuolar membrane	BP	1	1	0.0476855
GO:0038193	thromboxane A2 signaling pathway	BP	1	1	0.0476855
GO:0003167	atrioventricular bundle cell differentiation	BP	1	1	0.0476855
GO:1903570	regulation of protein kinase D signaling	BP	1	1	0.0476855
GO:1903572	positive regulation of protein kinase D signaling	BP	1	1	0.0476855
GO:0036517	chemoattraction of serotonergic neuron axon	BP	1	1	0.0476855
GO:0061347	planar cell polarity pathway involved in outflow tract morphogenesis	BP	1	1	0.0476855
GO:0061348	planar cell polarity pathway involved in ventricular septum morphogenesis	BP	1	1	0.0476855
GO:0061349	planar cell polarity pathway involved in cardiac right atrium morphogenesis	BP	1	1	0.0476855
GO:0061350	planar cell polarity pathway involved in cardiac muscle tissue morphogenesis	BP	1	1	0.0476855
GO:0061354	planar cell polarity pathway involved in pericardium morphogenesis	BP	1	1	0.0476855
GO:0061642	chemoattraction of axon	BP	1	1	0.0476855
GO:1904933	regulation of cell proliferation in midbrain	BP	1	1	0.0476855
GO:1904934	negative regulation of cell proliferation in midbrain	BP	1	1	0.0476855
GO:1904955	planar cell polarity pathway involved in midbrain dopaminergic neuron differentiation	BP	1	1	0.0476855
GO:1905438	non-canonical Wnt signaling pathway involved in midbrain dopaminergic neuron differentiation	BP	1	1	0.0476855
GO:0002188	translation reinitiation	BP	1	1	0.0476855
GO:1990256	signal clustering	BP	1	1	0.0476855
GO:0003144	embryonic heart tube formation	BP	1	1	0.0476855
GO:0071527	semaphorin-plexin signaling pathway involved in outflow tract morphogenesis	BP	1	1	0.0476855
GO:2000763	positive regulation of transcription from RNA polymerase II promoter involved in norepinephrine biosynthetic process	BP	1	1	0.0476855
GO:2000764	positive regulation of semaphorin-plexin signaling pathway involved in outflow tract morphogenesis	BP	1	1	0.0476855
GO:2001260	regulation of semaphorin-plexin signaling pathway	BP	1	1	0.0476855
GO:2001262	positive regulation of semaphorin-plexin signaling pathway	BP	1	1	0.0476855
GO:0009720	detection of hormone stimulus	BP	1	1	0.0476855
GO:1903045	neural crest cell migration involved in sympathetic nervous system development	BP	1	1	0.0476855
GO:0036146	cellular response to mycotoxin	BP	1	1	0.0476855
GO:0072720	response to dithiothreitol	BP	1	1	0.0476855
GO:0072721	cellular response to dithiothreitol	BP	1	1	0.0476855
GO:0061646	positive regulation of glutamate neurotransmitter secretion in response to membrane depolarization	BP	1	1	0.0476855
GO:1903294	regulation of glutamate secretion neurotransmission	BP	1	1	0.0476855
GO:1903296	positive regulation of glutamate secretion neurotransmission	BP	1	1	0.0476855
GO:0098883	synapse disassembly	BP	1	1	0.0476855
GO:1901296	negative regulation of canonical Wnt signaling pathway involved in cardiac muscle cell fate commitment	BP	1	1	0.0476855
GO:1904701	Wnt-Frizzled-LRP5/6 complex assembly	BP	1	1	0.0476855
GO:1904711	regulation of Wnt-Frizzled-LRP5/6 complex assembly	BP	1	1	0.0476855
GO:1904723	negative regulation of Wnt-Frizzled-LRP5/6 complex assembly	BP	1	1	0.0476855
GO:1905067	negative regulation of canonical Wnt signaling pathway involved in heart development	BP	1	1	0.0476855
GO:0035723	interleukin-15-mediated signaling pathway	BP	1	1	0.0476855
GO:0035724	CD24 biosynthetic process	BP	1	1	0.0476855
GO:0060466	activation of meiosis involved in egg activation	BP	1	1	0.0476855
GO:0071350	cellular response to interleukin-15	BP	1	1	0.0476855
GO:2000438	negative regulation of monocyte extravasation	BP	1	1	0.0476855
GO:2000559	regulation of CD24 biosynthetic process	BP	1	1	0.0476855
GO:2000560	positive regulation of CD24 biosynthetic process	BP	1	1	0.0476855
GO:0034213	quinolinate catabolic process	BP	1	1	0.0476855
GO:1902073	positive regulation of hypoxia-inducible factor-1alpha signaling pathway	BP	1	1	0.0476855
GO:0010836	negative regulation of protein ADP-ribosylation	BP	1	1	0.0476855
GO:0009229	thiamine diphosphate biosynthetic process	BP	1	1	0.0476855
GO:1903723	negative regulation of centriole elongation	BP	1	1	0.0476855
GO:0038114	interleukin-21-mediated signaling pathway	BP	1	1	0.0476855
GO:0098756	response to interleukin-21	BP	1	1	0.0476855
GO:0098757	cellular response to interleukin-21	BP	1	1	0.0476855
GO:0050894	determination of affect	BP	1	1	0.0476855
GO:1904863	regulation of beta-catenin-TCF complex assembly	BP	1	1	0.0476855
GO:1904864	negative regulation of beta-catenin-TCF complex assembly	BP	1	1	0.0476855
GO:0090386	phagosome maturation involved in apoptotic cell clearance	BP	1	1	0.0476855
GO:0090387	phagolysosome assembly involved in apoptotic cell clearance	BP	1	1	0.0476855
GO:0060857	establishment of glial blood-brain barrier	BP	1	1	0.0476855
GO:0039007	pronephric nephron morphogenesis	BP	1	1	0.0476855
GO:0039008	pronephric nephron tubule morphogenesis	BP	1	1	0.0476855
GO:0039022	pronephric duct development	BP	1	1	0.0476855
GO:0039023	pronephric duct morphogenesis	BP	1	1	0.0476855
GO:0070121	Kupffer's vesicle development	BP	1	1	0.0476855
GO:0019389	glucuronoside metabolic process	BP	1	1	0.0476855
GO:0019391	glucuronoside catabolic process	BP	1	1	0.0476855
GO:0003137	Notch signaling pathway involved in heart induction	BP	1	1	0.0476855
GO:0003210	cardiac atrium formation	BP	1	1	0.0476855
GO:0003235	sinus venosus development	BP	1	1	0.0476855
GO:0003236	sinus venosus morphogenesis	BP	1	1	0.0476855
GO:0003259	cardioblast anterior-lateral migration	BP	1	1	0.0476855
GO:0003260	cardioblast migration	BP	1	1	0.0476855
GO:0003318	cell migration to the midline involved in heart development	BP	1	1	0.0476855
GO:0035480	regulation of Notch signaling pathway involved in heart induction	BP	1	1	0.0476855
GO:0035481	positive regulation of Notch signaling pathway involved in heart induction	BP	1	1	0.0476855
GO:0042664	negative regulation of endodermal cell fate specification	BP	1	1	0.0476855
GO:0060975	cardioblast migration to the midline involved in heart field formation	BP	1	1	0.0476855
GO:0070368	positive regulation of hepatocyte differentiation	BP	1	1	0.0476855
GO:0060232	delamination	BP	1	1	0.0476855
GO:0071642	positive regulation of macrophage inflammatory protein 1 alpha production	BP	1	1	0.0476855
GO:0097497	blood vessel endothelial cell delamination	BP	1	1	0.0476855
GO:1903444	negative regulation of brown fat cell differentiation	BP	1	1	0.0476855
GO:1903759	signal transduction involved in regulation of aerobic respiration	BP	1	1	0.0476855
GO:1902504	regulation of signal transduction involved in mitotic G2 DNA damage checkpoint	BP	1	1	0.0476855
GO:1904289	regulation of mitotic DNA damage checkpoint	BP	1	1	0.0476855
GO:0061143	alveolar primary septum development	BP	1	1	0.0476855
GO:0035750	protein localization to myelin sheath abaxonal region	BP	1	1	0.0476855
GO:0032889	regulation of vacuole fusion non-autophagic	BP	1	1	0.0476855
GO:0097036	regulation of plasma membrane sterol distribution	BP	1	1	0.0476855
GO:0070246	natural killer cell apoptotic process	BP	1	1	0.0476855
GO:0070247	regulation of natural killer cell apoptotic process	BP	1	1	0.0476855
GO:0021956	central nervous system interneuron axonogenesis	BP	1	1	0.0476855
GO:1902010	negative regulation of translation in response to endoplasmic reticulum stress	BP	1	1	0.0476855
GO:0016108	tetraterpenoid metabolic process	BP	1	1	0.0476855
GO:0016116	carotenoid metabolic process	BP	1	1	0.0476855
GO:0016121	carotene catabolic process	BP	1	1	0.0476855
GO:0016122	xanthophyll metabolic process	BP	1	1	0.0476855
GO:0046247	terpene catabolic process	BP	1	1	0.0476855
GO:0060007	linear vestibuloocular reflex	BP	1	1	0.0476855
GO:0090247	cell motility involved in somitogenic axis elongation	BP	1	1	0.0476855
GO:0090249	regulation of cell motility involved in somitogenic axis elongation	BP	1	1	0.0476855
GO:1901229	regulation of non-canonical Wnt signaling pathway via JNK cascade	BP	1	1	0.0476855
GO:1901231	positive regulation of non-canonical Wnt signaling pathway via JNK cascade	BP	1	1	0.0476855
GO:1901232	regulation of convergent extension involved in axis elongation	BP	1	1	0.0476855
GO:1901233	negative regulation of convergent extension involved in axis elongation	BP	1	1	0.0476855
GO:0003136	negative regulation of heart induction by canonical Wnt signaling pathway	BP	1	1	0.0476855
GO:0009997	negative regulation of cardioblast cell fate specification	BP	1	1	0.0476855
GO:0021874	Wnt signaling pathway involved in forebrain neuroblast division	BP	1	1	0.0476855
GO:0042684	cardioblast cell fate commitment	BP	1	1	0.0476855
GO:0042685	cardioblast cell fate specification	BP	1	1	0.0476855
GO:0042686	regulation of cardioblast cell fate specification	BP	1	1	0.0476855
GO:0048337	positive regulation of mesodermal cell fate specification	BP	1	1	0.0476855
GO:1901320	negative regulation of heart induction	BP	1	1	0.0476855
GO:2000044	negative regulation of cardiac cell fate specification	BP	1	1	0.0476855
GO:2000081	positive regulation of canonical Wnt signaling pathway involved in controlling type B pancreatic cell proliferation	BP	1	1	0.0476855
GO:0033609	oxalate metabolic process	BP	1	1	0.0476855
GO:0098829	intestinal folate absorption	BP	1	1	0.0476855
GO:1904447	folic acid import into cell	BP	1	1	0.0476855
GO:0032658	regulation of interleukin-15 production	BP	1	1	0.0476855
GO:0032738	positive regulation of interleukin-15 production	BP	1	1	0.0476855
GO:0035664	TIRAP-dependent toll-like receptor signaling pathway	BP	1	1	0.0476855
GO:0035665	TIRAP-dependent toll-like receptor 4 signaling pathway	BP	1	1	0.0476855
GO:0072165	anterior mesonephric tubule development	BP	1	1	0.0476855
GO:0072167	specification of mesonephric tubule identity	BP	1	1	0.0476855
GO:0072168	specification of anterior mesonephric tubule identity	BP	1	1	0.0476855
GO:0072169	specification of posterior mesonephric tubule identity	BP	1	1	0.0476855
GO:0072184	renal vesicle progenitor cell differentiation	BP	1	1	0.0476855
GO:0072258	metanephric interstitial fibroblast differentiation	BP	1	1	0.0476855
GO:0072259	metanephric interstitial fibroblast development	BP	1	1	0.0476855
GO:0016077	snoRNA catabolic process	BP	1	1	0.0476855
GO:0035862	dITP metabolic process	BP	1	1	0.0476855
GO:0035863	dITP catabolic process	BP	1	1	0.0476855
GO:1901639	XDP catabolic process	BP	1	1	0.0476855
GO:0010879	cholesterol transport involved in cholesterol storage	BP	1	1	0.0476855
GO:0046380	N-acetylneuraminate biosynthetic process	BP	1	1	0.0476855
GO:2000690	regulation of cardiac muscle cell myoblast differentiation	BP	1	1	0.0476855
GO:2000691	negative regulation of cardiac muscle cell myoblast differentiation	BP	1	1	0.0476855
GO:0014036	neural crest cell fate specification	BP	1	1	0.0476855
GO:0046105	thymidine biosynthetic process	BP	1	1	0.0476855
GO:0046120	deoxyribonucleoside biosynthetic process	BP	1	1	0.0476855
GO:0046126	pyrimidine deoxyribonucleoside biosynthetic process	BP	1	1	0.0476855
GO:1903952	regulation of voltage-gated potassium channel activity involved in atrial cardiac muscle cell action potential repolarization	BP	1	1	0.0476855
GO:1903954	positive regulation of voltage-gated potassium channel activity involved in atrial cardiac muscle cell action potential repolarization	BP	1	1	0.0476855
GO:0034552	respiratory chain complex II assembly	BP	1	1	0.0476855
GO:0034553	mitochondrial respiratory chain complex II assembly	BP	1	1	0.0476855
GO:0097032	mitochondrial respiratory chain complex II biogenesis	BP	1	1	0.0476855
GO:0019428	allantoin biosynthetic process	BP	1	1	0.0476855
GO:0019628	urate catabolic process	BP	1	1	0.0476855
GO:0070985	TFIIK complex	CC	1	1	0.0476855
GO:0005600	collagen type XIII trimer	CC	1	1	0.0476855
GO:0030936	transmembrane collagen trimer	CC	1	1	0.0476855
GO:0044207	translation initiation ternary complex	CC	1	1	0.0476855
GO:0016507	mitochondrial fatty acid beta-oxidation multienzyme complex	CC	1	1	0.0476855
GO:0036125	fatty acid beta-oxidation multienzyme complex	CC	1	1	0.0476855
GO:0044220	host cell perinuclear region of cytoplasm	CC	1	1	0.0476855
GO:0002140	stereocilia tip link	CC	1	1	0.0476855
GO:0031477	myosin VII complex	CC	1	1	0.0476855
GO:1990427	stereocilia tip-link density	CC	1	1	0.0476855
GO:1990435	upper tip-link density	CC	1	1	0.0476855
GO:0035805	egg coat	CC	1	1	0.0476855
GO:0098595	perivitelline space	CC	1	1	0.0476855
GO:0071540	eukaryotic translation initiation factor 3 complex eIF3e	CC	1	1	0.0476855
GO:0017102	methionyl glutamyl tRNA synthetase complex	CC	1	1	0.0476855
GO:0070931	Golgi-associated vesicle lumen	CC	1	1	0.0476855
GO:0005395	eye pigment precursor transporter activity	MF	1	1	0.0476855
GO:0032448	DNA hairpin binding	MF	1	1	0.0476855
GO:1990272	anti-Mullerian hormone receptor activity	MF	1	1	0.0476855
GO:0035757	chemokine (C-C motif) ligand 19 binding	MF	1	1	0.0476855
GO:0035758	chemokine (C-C motif) ligand 21 binding	MF	1	1	0.0476855
GO:0038117	C-C motif chemokine 19 receptor activity	MF	1	1	0.0476855
GO:0038121	C-C motif chemokine 21 receptor activity	MF	1	1	0.0476855
GO:0004108	citrate (Si)-synthase activity	MF	1	1	0.0476855
GO:0036440	citrate synthase activity	MF	1	1	0.0476855
GO:0016495	C-X3-C chemokine receptor activity	MF	1	1	0.0476855
GO:0008398	sterol 14-demethylase activity	MF	1	1	0.0476855
GO:0018738	S-formylglutathione hydrolase activity	MF	1	1	0.0476855
GO:0004334	fumarylacetoacetase activity	MF	1	1	0.0476855
GO:0097677	STAT family protein binding	MF	1	1	0.0476855
GO:0003905	alkylbase DNA N-glycosylase activity	MF	1	1	0.0476855
GO:0008725	DNA-3-methyladenine glycosylase activity	MF	1	1	0.0476855
GO:0043733	DNA-3-methylbase glycosylase activity	MF	1	1	0.0476855
GO:0043916	DNA-7-methylguanine glycosylase activity	MF	1	1	0.0476855
GO:0052821	DNA-7-methyladenine glycosylase activity	MF	1	1	0.0476855
GO:0052822	DNA-3-methylguanine glycosylase activity	MF	1	1	0.0476855
GO:0004476	mannose-6-phosphate isomerase activity	MF	1	1	0.0476855
GO:0001626	nociceptin receptor activity	MF	1	1	0.0476855
GO:0005018	platelet-derived growth factor alpha-receptor activity	MF	1	1	0.0476855
GO:0015320	phosphate ion carrier activity	MF	1	1	0.0476855
GO:0034632	retinol transporter activity	MF	1	1	0.0476855
GO:0050121	N-acylglucosamine 2-epimerase activity	MF	1	1	0.0476855
GO:0098619	selenocysteine-tRNA ligase activity	MF	1	1	0.0476855
GO:0015132	prostaglandin transmembrane transporter activity	MF	1	1	0.0476855
GO:0071714	icosanoid transmembrane transporter activity	MF	1	1	0.0476855
GO:0031834	neurokinin receptor binding	MF	1	1	0.0476855
GO:0031835	substance P receptor binding	MF	1	1	0.0476855
GO:0004960	thromboxane receptor activity	MF	1	1	0.0476855
GO:0004961	thromboxane A2 receptor activity	MF	1	1	0.0476855
GO:0004796	thromboxane-A synthase activity	MF	1	1	0.0476855
GO:0036134	12-hydroxyheptadecatrienoic acid synthase activity	MF	1	1	0.0476855
GO:0008437	thyrotropin-releasing hormone activity	MF	1	1	0.0476855
GO:0043183	vascular endothelial growth factor receptor 1 binding	MF	1	1	0.0476855
GO:0005115	receptor tyrosine kinase-like orphan receptor binding	MF	1	1	0.0476855
GO:1902379	chemoattractant activity involved in axon guidance	MF	1	1	0.0476855
GO:1990738	pseudouridine 5'-phosphatase activity	MF	1	1	0.0476855
GO:0016287	glycerone-phosphate O-acyltransferase activity	MF	1	1	0.0476855
GO:0034722	gamma-glutamyl-peptidase activity	MF	1	1	0.0476855
GO:0008465	glycerate dehydrogenase activity	MF	1	1	0.0476855
GO:0016618	hydroxypyruvate reductase activity	MF	1	1	0.0476855
GO:0030267	glyoxylate reductase (NADP) activity	MF	1	1	0.0476855
GO:0072518	Rho-dependent protein serine/threonine kinase activity	MF	1	1	0.0476855
GO:0004394	heparan sulfate 2-O-sulfotransferase activity	MF	1	1	0.0476855
GO:0052798	beta-galactoside alpha-2 3-sialyltransferase activity	MF	1	1	0.0476855
GO:0016979	lipoate-protein ligase activity	MF	1	1	0.0476855
GO:0016992	lipoate synthase activity	MF	1	1	0.0476855
GO:0070283	radical SAM enzyme activity	MF	1	1	0.0476855
GO:0032440	2-alkenal reductase [NAD(P)] activity	MF	1	1	0.0476855
GO:0004788	thiamine diphosphokinase activity	MF	1	1	0.0476855
GO:0030975	thiamine binding	MF	1	1	0.0476855
GO:0004581	dolichyl-phosphate beta-glucosyltransferase activity	MF	1	1	0.0476855
GO:0001532	interleukin-21 receptor activity	MF	1	1	0.0476855
GO:0031877	somatostatin receptor binding	MF	1	1	0.0476855
GO:0004139	deoxyribose-phosphate aldolase activity	MF	1	1	0.0476855
GO:0050038	L-xylulose reductase (NADP+) activity	MF	1	1	0.0476855
GO:0008387	steroid 7-alpha-hydroxylase activity	MF	1	1	0.0476855
GO:0004512	inositol-3-phosphate synthase activity	MF	1	1	0.0476855
GO:0016872	intramolecular lyase activity	MF	1	1	0.0476855
GO:0043337	CDP-diacylglycerol-phosphatidylglycerol phosphatidyltransferase activity	MF	1	1	0.0476855
GO:0102390	mycophenolic acid acyl-glucuronide esterase activity	MF	1	1	0.0476855
GO:0071890	bicarbonate binding	MF	1	1	0.0476855
GO:0005034	osmosensor activity	MF	1	1	0.0476855
GO:0015275	stretch-activated cation-selective calcium channel activity	MF	1	1	0.0476855
GO:0008829	dCTP deaminase activity	MF	1	1	0.0476855
GO:0004747	ribokinase activity	MF	1	1	0.0476855
GO:0003882	CDP-diacylglycerol-serine O-phosphatidyltransferase activity	MF	1	1	0.0476855
GO:0008903	hydroxypyruvate isomerase activity	MF	1	1	0.0476855
GO:0008700	4-hydroxy-2-oxoglutarate aldolase activity	MF	1	1	0.0476855
GO:0008962	phosphatidylglycerophosphatase activity	MF	1	1	0.0476855
GO:0050897	cobalt ion binding	MF	1	1	0.0476855
GO:0090450	inosine-diphosphatase activity	MF	1	1	0.0476855
GO:0097382	deoxynucleoside-diphosphatase activity	MF	1	1	0.0476855
GO:0097383	dIDP diphosphatase activity	MF	1	1	0.0476855
GO:1901640	XTP binding	MF	1	1	0.0476855
GO:1901641	ITP binding	MF	1	1	0.0476855
GO:0047988	hydroxyacid-oxoacid transhydrogenase activity	MF	1	1	0.0476855
GO:0050124	N-acylneuraminate-9-phosphatase activity	MF	1	1	0.0476855
GO:0004835	tubulin-tyrosine ligase activity	MF	1	1	0.0476855
GO:0015355	secondary active monocarboxylate transmembrane transporter activity	MF	1	1	0.0476855
GO:0000823	inositol-1 4 5-trisphosphate 6-kinase activity	MF	1	1	0.0476855
GO:0000824	inositol tetrakisphosphate 3-kinase activity	MF	1	1	0.0476855
GO:0000825	inositol tetrakisphosphate 6-kinase activity	MF	1	1	0.0476855
GO:0047326	inositol tetrakisphosphate 5-kinase activity	MF	1	1	0.0476855
GO:0047166	1-alkenylglycerophosphoethanolamine O-acyltransferase activity	MF	1	1	0.0476855
GO:0050479	glyceryl-ether monooxygenase activity	MF	1	1	0.0476855
GO:1901565	organonitrogen compound catabolic process	BP	350	24	0.0479415
GO:0050680	negative regulation of epithelial cell proliferation	BP	115	10	0.048037
GO:0008333	endosome to lysosome transport	BP	42	5	0.0482949
GO:0060038	cardiac muscle cell proliferation	BP	42	5	0.0482949
GO:0072528	pyrimidine-containing compound biosynthetic process	BP	42	5	0.0482949
GO:0016776	phosphotransferase activity phosphate group as acceptor	MF	42	5	0.0482949
GO:0008064	regulation of actin polymerization or depolymerization	BP	163	13	0.0483458
GO:0035004	phosphatidylinositol 3-kinase activity	MF	70	7	0.0487752
GO:0001843	neural tube closure	BP	85	8	0.0495373
GO:0001892	embryonic placenta development	BP	85	8	0.0495373
GO:0016126	sterol biosynthetic process	BP	56	6	0.0496711
GO:1902936	phosphatidylinositol bisphosphate binding	MF	56	6	0.0496711
GO:0030832	regulation of actin filament length	BP	164	13	0.0503265
GO:0006664	glycolipid metabolic process	BP	116	10	0.0504298
GO:0050878	regulation of body fluid levels	BP	495	32	0.0504692
GO:0001775	cell activation	BP	884	53	0.0506928
GO:0005102	receptor binding	MF	1439	82	0.0512616
GO:0044282	small molecule catabolic process	BP	335	23	0.0513856
GO:1903055	positive regulation of extracellular matrix organization	BP	18	3	0.0516663
GO:0070207	protein homotrimerization	BP	18	3	0.0516663
GO:0035886	vascular smooth muscle cell differentiation	BP	18	3	0.0516663
GO:0032288	myelin assembly	BP	18	3	0.0516663
GO:0007625	grooming behavior	BP	18	3	0.0516663
GO:0060749	mammary gland alveolus development	BP	18	3	0.0516663
GO:0061377	mammary gland lobule development	BP	18	3	0.0516663
GO:0042226	interleukin-6 biosynthetic process	BP	18	3	0.0516663
GO:0046655	folic acid metabolic process	BP	18	3	0.0516663
GO:1990182	exosomal secretion	BP	18	3	0.0516663
GO:0000242	pericentriolar material	CC	18	3	0.0516663
GO:0070064	proline-rich region binding	MF	18	3	0.0516663
GO:0016646	oxidoreductase activity acting on the CH-NH group of donors NAD or NADP as acceptor	MF	18	3	0.0516663
GO:0071837	HMG box domain binding	MF	18	3	0.0516663
GO:0001570	vasculogenesis	BP	71	7	0.051986
GO:0008217	regulation of blood pressure	BP	165	13	0.0523622
GO:0043209	myelin sheath	CC	165	13	0.0523622
GO:0007268	chemical synaptic transmission	BP	588	37	0.0524198
GO:0098916	anterograde trans-synaptic signaling	BP	588	37	0.0524198
GO:0099536	synaptic signaling	BP	588	37	0.0524198
GO:0099537	trans-synaptic signaling	BP	588	37	0.0524198
GO:0060606	tube closure	BP	86	8	0.0524434
GO:0070126	mitochondrial translational termination	BP	86	8	0.0524434
GO:0006487	protein N-linked glycosylation	BP	86	8	0.0524434
GO:0006975	DNA damage induced protein phosphorylation	BP	8	2	0.0525216
GO:1904238	pericyte cell differentiation	BP	8	2	0.0525216
GO:0090037	positive regulation of protein kinase C signaling	BP	8	2	0.0525216
GO:1901096	regulation of autophagosome maturation	BP	8	2	0.0525216
GO:0061307	cardiac neural crest cell differentiation involved in heart development	BP	8	2	0.0525216
GO:0061308	cardiac neural crest cell development involved in heart development	BP	8	2	0.0525216
GO:0072530	purine-containing compound transmembrane transport	BP	8	2	0.0525216
GO:0061101	neuroendocrine cell differentiation	BP	8	2	0.0525216
GO:0032594	protein transport within lipid bilayer	BP	8	2	0.0525216
GO:2000726	negative regulation of cardiac muscle cell differentiation	BP	8	2	0.0525216
GO:0003139	secondary heart field specification	BP	8	2	0.0525216
GO:0048739	cardiac muscle fiber development	BP	8	2	0.0525216
GO:0060677	ureteric bud elongation	BP	8	2	0.0525216
GO:0072102	glomerulus morphogenesis	BP	8	2	0.0525216
GO:0072161	mesenchymal cell differentiation involved in kidney development	BP	8	2	0.0525216
GO:2001012	mesenchymal cell differentiation involved in renal system development	BP	8	2	0.0525216
GO:0002883	regulation of hypersensitivity	BP	8	2	0.0525216
GO:0070131	positive regulation of mitochondrial translation	BP	8	2	0.0525216
GO:0002468	dendritic cell antigen processing and presentation	BP	8	2	0.0525216
GO:0002604	regulation of dendritic cell antigen processing and presentation	BP	8	2	0.0525216
GO:0072610	interleukin-12 secretion	BP	8	2	0.0525216
GO:0006570	tyrosine metabolic process	BP	8	2	0.0525216
GO:0021873	forebrain neuroblast division	BP	8	2	0.0525216
GO:2000020	positive regulation of male gonad development	BP	8	2	0.0525216
GO:0043615	astrocyte cell migration	BP	8	2	0.0525216
GO:0032790	ribosome disassembly	BP	8	2	0.0525216
GO:0060638	mesenchymal-epithelial cell signaling	BP	8	2	0.0525216
GO:0007442	hindgut morphogenesis	BP	8	2	0.0525216
GO:0019673	GDP-mannose metabolic process	BP	8	2	0.0525216
GO:0060534	trachea cartilage development	BP	8	2	0.0525216
GO:0090244	Wnt signaling pathway involved in somitogenesis	BP	8	2	0.0525216
GO:2000381	negative regulation of mesoderm development	BP	8	2	0.0525216
GO:0032049	cardiolipin biosynthetic process	BP	8	2	0.0525216
GO:0071578	zinc II ion transmembrane import	BP	8	2	0.0525216
GO:0000506	glycosylphosphatidylinositol-N-acetylglucosaminyltransferase (GPI-GnT) complex	CC	8	2	0.0525216
GO:0015211	purine nucleoside transmembrane transporter activity	MF	8	2	0.0525216
GO:0004126	cytidine deaminase activity	MF	8	2	0.0525216
GO:0016742	hydroxymethyl-formyl- and related transferase activity	MF	8	2	0.0525216
GO:0017169	CDP-alcohol phosphatidyltransferase activity	MF	8	2	0.0525216
GO:0008430	selenium binding	MF	8	2	0.0525216
GO:0038036	sphingosine-1-phosphate receptor activity	MF	8	2	0.0525216
GO:0046920	alpha-(1->3)-fucosyltransferase activity	MF	8	2	0.0525216
GO:0016861	intramolecular oxidoreductase activity interconverting aldoses and ketoses	MF	8	2	0.0525216
GO:0004985	opioid receptor activity	MF	8	2	0.0525216
GO:0038191	neuropilin binding	MF	8	2	0.0525216
GO:0050700	CARD domain binding	MF	8	2	0.0525216
GO:0031334	positive regulation of protein complex assembly	BP	215	16	0.0525239
GO:1903335	regulation of vacuolar transport	BP	30	4	0.0525859
GO:0001953	negative regulation of cell-matrix adhesion	BP	30	4	0.0525859
GO:0097576	vacuole fusion	BP	30	4	0.0525859
GO:0042755	eating behavior	BP	30	4	0.0525859
GO:0000272	polysaccharide catabolic process	BP	30	4	0.0525859
GO:0021884	forebrain neuron development	BP	30	4	0.0525859
GO:0030990	intraciliary transport particle	CC	30	4	0.0525859
GO:0000062	fatty-acyl-CoA binding	MF	30	4	0.0525859
GO:0030546	receptor activator activity	MF	30	4	0.0525859
GO:1901658	glycosyl compound catabolic process	BP	43	5	0.052595
GO:0050654	chondroitin sulfate proteoglycan metabolic process	BP	43	5	0.052595
GO:0009295	nucleoid	CC	43	5	0.052595
GO:0042645	mitochondrial nucleoid	CC	43	5	0.052595
GO:0016303	1-phosphatidylinositol-3-kinase activity	MF	43	5	0.052595
GO:0010629	negative regulation of gene expression	BP	1441	82	0.0526071
GO:0050921	positive regulation of chemotaxis	BP	117	10	0.0529008
GO:1902115	regulation of organelle assembly	BP	133	11	0.0532323
GO:0042327	positive regulation of phosphorylation	BP	906	54	0.0533634
GO:0032611	interleukin-1 beta production	BP	57	6	0.0533763
GO:0043043	peptide biosynthetic process	BP	663	41	0.0536723
GO:0007584	response to nutrient	BP	166	13	0.0544536
GO:0046165	alcohol biosynthetic process	BP	102	9	0.0545033
GO:0006790	sulfur compound metabolic process	BP	355	24	0.0547087
GO:0036477	somatodendritic compartment	CC	646	40	0.05524
GO:0016525	negative regulation of angiogenesis	BP	72	7	0.0553266
GO:0030595	leukocyte chemotaxis	BP	183	14	0.0554076
GO:1903509	liposaccharide metabolic process	BP	118	10	0.0554507
GO:1901615	organic hydroxy compound metabolic process	BP	409	27	0.055468
GO:0007204	positive regulation of cytosolic calcium ion concentration	BP	251	18	0.0559366
GO:0044459	plasma membrane part	CC	2567	139	0.056014
GO:0005887	integral component of plasma membrane	CC	1602	90	0.0564358
GO:0031253	cell projection membrane	CC	286	20	0.0566083
GO:0006914	autophagy	BP	428	28	0.0568466
GO:0002279	mast cell activation involved in immune response	BP	44	5	0.0571109
GO:0043303	mast cell degranulation	BP	44	5	0.0571109
GO:0044088	regulation of vacuole organization	BP	44	5	0.0571109
GO:0044275	cellular carbohydrate catabolic process	BP	44	5	0.0571109
GO:0046460	neutral lipid biosynthetic process	BP	44	5	0.0571109
GO:0046463	acylglycerol biosynthetic process	BP	44	5	0.0571109
GO:0030545	receptor regulator activity	MF	44	5	0.0571109
GO:0043087	regulation of GTPase activity	BP	685	42	0.057205
GO:0036126	sperm flagellum	CC	58	6	0.0572449
GO:0006694	steroid biosynthetic process	BP	151	12	0.0575272
GO:0097529	myeloid leukocyte migration	BP	151	12	0.0575272
GO:0046467	membrane lipid biosynthetic process	BP	135	11	0.0580733
GO:0009163	nucleoside biosynthetic process	BP	119	10	0.0580802
GO:0044448	cell cortex part	CC	119	10	0.0580802
GO:0005179	hormone activity	MF	119	10	0.0580802
GO:0048384	retinoic acid receptor signaling pathway	BP	31	4	0.0581894
GO:1903115	regulation of actin filament-based movement	BP	31	4	0.0581894
GO:0043001	Golgi to plasma membrane protein transport	BP	31	4	0.0581894
GO:0050704	regulation of interleukin-1 secretion	BP	31	4	0.0581894
GO:0042462	eye photoreceptor cell development	BP	31	4	0.0581894
GO:0036257	multivesicular body organization	BP	31	4	0.0581894
GO:0043531	ADP binding	MF	31	4	0.0581894
GO:0016790	thiolester hydrolase activity	MF	31	4	0.0581894
GO:0005581	collagen trimer	CC	88	8	0.0585783
GO:0034104	negative regulation of tissue remodeling	BP	19	3	0.0592507
GO:0003215	cardiac right ventricle morphogenesis	BP	19	3	0.0592507
GO:0046653	tetrahydrofolate metabolic process	BP	19	3	0.0592507
GO:0003299	muscle hypertrophy in response to stress	BP	19	3	0.0592507
GO:0014887	cardiac muscle adaptation	BP	19	3	0.0592507
GO:0014898	cardiac muscle hypertrophy in response to stress	BP	19	3	0.0592507
GO:0090312	positive regulation of protein deacetylation	BP	19	3	0.0592507
GO:0072111	cell proliferation involved in kidney development	BP	19	3	0.0592507
GO:0001710	mesodermal cell fate commitment	BP	19	3	0.0592507
GO:0072077	renal vesicle morphogenesis	BP	19	3	0.0592507
GO:0060065	uterus development	BP	19	3	0.0592507
GO:0045663	positive regulation of myoblast differentiation	BP	19	3	0.0592507
GO:0060074	synapse maturation	BP	19	3	0.0592507
GO:0072079	nephron tubule formation	BP	19	3	0.0592507
GO:1903649	regulation of cytoplasmic transport	BP	19	3	0.0592507
GO:0098827	endoplasmic reticulum subcompartment	CC	19	3	0.0592507
GO:1901701	cellular response to oxygen-containing compound	BP	894	53	0.0596014
GO:0045927	positive regulation of growth	BP	236	17	0.0598599
GO:0006665	sphingolipid metabolic process	BP	152	12	0.0598852
GO:0048469	cell maturation	BP	152	12	0.0598852
GO:0006575	cellular modified amino acid metabolic process	BP	152	12	0.0598852
GO:0051017	actin filament bundle assembly	BP	120	10	0.0607898
GO:0032418	lysosome localization	BP	59	6	0.0612772
GO:0045670	regulation of osteoclast differentiation	BP	59	6	0.0612772
GO:0022857	transmembrane transporter activity	MF	1010	59	0.0614067
GO:0042391	regulation of membrane potential	BP	342	23	0.0618128
GO:0030133	transport vesicle	CC	342	23	0.0618128
GO:0035094	response to nicotine	BP	45	5	0.0618422
GO:1901068	guanosine-containing compound metabolic process	BP	45	5	0.0618422
GO:0008542	visual learning	BP	45	5	0.0618422
GO:0060443	mammary gland morphogenesis	BP	45	5	0.0618422
GO:0021517	ventral spinal cord development	BP	45	5	0.0618422
GO:0035987	endodermal cell differentiation	BP	45	5	0.0618422
GO:0034109	homotypic cell-cell adhesion	BP	74	7	0.0624002
GO:0046849	bone remodeling	BP	74	7	0.0624002
GO:2000181	negative regulation of blood vessel morphogenesis	BP	74	7	0.0624002
GO:0009059	macromolecule biosynthetic process	BP	5046	261	0.0628715
GO:0030426	growth cone	CC	137	11	0.0631967
GO:0007631	feeding behavior	BP	105	9	0.06323
GO:0051241	negative regulation of multicellular organismal process	BP	974	57	0.0633966
GO:0001932	regulation of protein phosphorylation	BP	1262	72	0.0634544
GO:1901659	glycosyl compound biosynthetic process	BP	121	10	0.0635801
GO:0008154	actin polymerization or depolymerization	BP	187	14	0.0639704
GO:2000249	regulation of actin cytoskeleton reorganization	BP	32	4	0.0640982
GO:0051930	regulation of sensory perception of pain	BP	32	4	0.0640982
GO:0051931	regulation of sensory perception	BP	32	4	0.0640982
GO:0001569	patterning of blood vessels	BP	32	4	0.0640982
GO:0035058	nonmotile primary cilium assembly	BP	32	4	0.0640982
GO:0009954	proximal/distal pattern formation	BP	32	4	0.0640982
GO:0032391	photoreceptor connecting cilium	CC	32	4	0.0640982
GO:0001664	G-protein coupled receptor binding	MF	256	18	0.065073
GO:0042451	purine nucleoside biosynthetic process	BP	90	8	0.0651481
GO:0046129	purine ribonucleoside biosynthetic process	BP	90	8	0.0651481
GO:0014051	gamma-aminobutyric acid secretion	BP	9	2	0.0654386
GO:0048617	embryonic foregut morphogenesis	BP	9	2	0.0654386
GO:0032025	response to cobalt ion	BP	9	2	0.0654386
GO:0015868	purine ribonucleotide transport	BP	9	2	0.0654386
GO:0051503	adenine nucleotide transport	BP	9	2	0.0654386
GO:0006216	cytidine catabolic process	BP	9	2	0.0654386
GO:0009972	cytidine deamination	BP	9	2	0.0654386
GO:0046087	cytidine metabolic process	BP	9	2	0.0654386
GO:0061549	sympathetic ganglion development	BP	9	2	0.0654386
GO:0060539	diaphragm development	BP	9	2	0.0654386
GO:0060068	vagina development	BP	9	2	0.0654386
GO:0035845	photoreceptor cell outer segment organization	BP	9	2	0.0654386
GO:1902855	regulation of nonmotile primary cilium assembly	BP	9	2	0.0654386
GO:0048672	positive regulation of collateral sprouting	BP	9	2	0.0654386
GO:0061004	pattern specification involved in kidney development	BP	9	2	0.0654386
GO:0072048	renal system pattern specification	BP	9	2	0.0654386
GO:0002524	hypersensitivity	BP	9	2	0.0654386
GO:0070314	G1 to G0 transition	BP	9	2	0.0654386
GO:0030854	positive regulation of granulocyte differentiation	BP	9	2	0.0654386
GO:0071803	positive regulation of podosome assembly	BP	9	2	0.0654386
GO:2000018	regulation of male gonad development	BP	9	2	0.0654386
GO:0030917	midbrain-hindbrain boundary development	BP	9	2	0.0654386
GO:0098722	asymmetric stem cell division	BP	9	2	0.0654386
GO:0060872	semicircular canal development	BP	9	2	0.0654386
GO:0060215	primitive hemopoiesis	BP	9	2	0.0654386
GO:0061525	hindgut development	BP	9	2	0.0654386
GO:0035878	nail development	BP	9	2	0.0654386
GO:0045091	regulation of single stranded viral RNA replication via double stranded DNA intermediate	BP	9	2	0.0654386
GO:0043117	positive regulation of vascular permeability	BP	9	2	0.0654386
GO:0021559	trigeminal nerve development	BP	9	2	0.0654386
GO:0021785	branchiomotor neuron axon guidance	BP	9	2	0.0654386
GO:0010528	regulation of transposition	BP	9	2	0.0654386
GO:0010529	negative regulation of transposition	BP	9	2	0.0654386
GO:0098984	neuron to neuron synapse	CC	9	2	0.0654386
GO:0031095	platelet dense tubular network membrane	CC	9	2	0.0654386
GO:0032045	guanyl-nucleotide exchange factor complex	CC	9	2	0.0654386
GO:0005024	transforming growth factor beta-activated receptor activity	MF	9	2	0.0654386
GO:0016208	AMP binding	MF	9	2	0.0654386
GO:0016595	glutamate binding	MF	9	2	0.0654386
GO:0004576	oligosaccharyl transferase activity	MF	9	2	0.0654386
GO:0004690	cyclic nucleotide-dependent protein kinase activity	MF	9	2	0.0654386
GO:0016405	CoA-ligase activity	MF	9	2	0.0654386
GO:0047144	2-acylglycerol-3-phosphate O-acyltransferase activity	MF	9	2	0.0654386
GO:0032652	regulation of interleukin-1 production	BP	60	6	0.0654736
GO:0070491	repressing transcription factor binding	MF	60	6	0.0654736
GO:0005794	Golgi apparatus	CC	1439	81	0.0655152
GO:0006412	translation	BP	637	39	0.0660444
GO:0048588	developmental cell growth	BP	188	14	0.066242
GO:0030010	establishment of cell polarity	BP	106	9	0.0663248
GO:0001889	liver development	BP	122	10	0.0664516
GO:0002448	mast cell mediated immunity	BP	46	5	0.0667883
GO:0031018	endocrine pancreas development	BP	46	5	0.0667883
GO:0048701	embryonic cranial skeleton morphogenesis	BP	46	5	0.0667883
GO:0032984	macromolecular complex disassembly	BP	257	18	0.0670157
GO:0022892	substrate-specific transporter activity	MF	1112	64	0.06714
GO:0031327	negative regulation of cellular biosynthetic process	BP	1441	81	0.0671419
GO:0072234	metanephric nephron tubule development	BP	20	3	0.067324
GO:0070230	positive regulation of lymphocyte apoptotic process	BP	20	3	0.067324
GO:1902932	positive regulation of alcohol biosynthetic process	BP	20	3	0.067324
GO:0043949	regulation of cAMP-mediated signaling	BP	20	3	0.067324
GO:0060008	Sertoli cell differentiation	BP	20	3	0.067324
GO:0060602	branch elongation of an epithelium	BP	20	3	0.067324
GO:0009084	glutamine family amino acid biosynthetic process	BP	20	3	0.067324
GO:0036499	PERK-mediated unfolded protein response	BP	20	3	0.067324
GO:0060039	pericardium development	BP	20	3	0.067324
GO:0003416	endochondral bone growth	BP	20	3	0.067324
GO:0015248	sterol transporter activity	MF	20	3	0.067324
GO:1901677	phosphate transmembrane transporter activity	MF	20	3	0.067324
GO:0035255	ionotropic glutamate receptor binding	MF	20	3	0.067324
GO:0016780	phosphotransferase activity for other substituted phosphate groups	MF	20	3	0.067324
GO:0017157	regulation of exocytosis	BP	155	12	0.0673411
GO:0046661	male sex differentiation	BP	155	12	0.0673411
GO:0007601	visual perception	BP	206	15	0.0685623
GO:0009135	purine nucleoside diphosphate metabolic process	BP	91	8	0.0685974
GO:0009179	purine ribonucleoside diphosphate metabolic process	BP	91	8	0.0685974
GO:0001952	regulation of cell-matrix adhesion	BP	91	8	0.0685974
GO:0014020	primary neural tube formation	BP	91	8	0.0685974
GO:0046649	lymphocyte activation	BP	621	38	0.0693037
GO:0016241	regulation of macroautophagy	BP	123	10	0.0694047
GO:0032273	positive regulation of protein polymerization	BP	107	9	0.0695134
GO:0002761	regulation of myeloid leukocyte differentiation	BP	107	9	0.0695134
GO:0042089	cytokine biosynthetic process	BP	107	9	0.0695134
GO:0071704	organic substance metabolic process	BP	10448	520	0.0699259
GO:0009890	negative regulation of biosynthetic process	BP	1464	82	0.0700633
GO:0042339	keratan sulfate metabolic process	BP	33	4	0.0703082
GO:0048048	embryonic eye morphogenesis	BP	33	4	0.0703082
GO:0060043	regulation of cardiac muscle cell proliferation	BP	33	4	0.0703082
GO:0000578	embryonic axis specification	BP	33	4	0.0703082
GO:0006654	phosphatidic acid biosynthetic process	BP	33	4	0.0703082
GO:0046473	phosphatidic acid metabolic process	BP	33	4	0.0703082
GO:0014070	response to organic cyclic compound	BP	867	51	0.0707374
GO:0010562	positive regulation of phosphorus metabolic process	BP	1020	59	0.0710159
GO:0045937	positive regulation of phosphate metabolic process	BP	1020	59	0.0710159
GO:1990267	response to transition metal nanoparticle	BP	124	10	0.0724396
GO:0061572	actin filament bundle organization	BP	124	10	0.0724396
GO:0044723	single-organism carbohydrate metabolic process	BP	439	28	0.0727978
GO:0098590	plasma membrane region	CC	907	53	0.0728404
GO:0003674	molecular_function	MF	16309	792	0.0732266
GO:1901605	alpha-amino acid metabolic process	BP	191	14	0.0733762
GO:0034645	cellular macromolecule biosynthetic process	BP	4884	252	0.0737418
GO:0016757	transferase activity transferring glycosyl groups	MF	278	19	0.0739645
GO:0007041	lysosomal transport	BP	77	7	0.0739982
GO:0005201	extracellular matrix structural constituent	MF	77	7	0.0739982
GO:0014066	regulation of phosphatidylinositol 3-kinase signaling	BP	141	11	0.0743055
GO:0003300	cardiac muscle hypertrophy	BP	62	6	0.074358
GO:0005840	ribosome	CC	226	16	0.0749029
GO:0010506	regulation of autophagy	BP	261	18	0.0751792
GO:0009116	nucleoside metabolic process	BP	386	25	0.0753098
GO:0008201	heparin binding	MF	158	12	0.075378
GO:2000112	regulation of cellular macromolecule biosynthetic process	BP	3909	204	0.0754819
GO:0071559	response to transforming growth factor beta	BP	209	15	0.0755195
GO:0061008	hepaticobiliary system development	BP	125	10	0.0755568
GO:0044456	synapse part	CC	570	35	0.0758051
GO:0030901	midbrain development	BP	93	8	0.075826
GO:0009185	ribonucleoside diphosphate metabolic process	BP	93	8	0.075826
GO:0043473	pigmentation	BP	93	8	0.075826
GO:0004553	hydrolase activity hydrolyzing O-glycosyl compounds	MF	93	8	0.075826
GO:0010001	glial cell differentiation	BP	175	13	0.0758497
GO:0034329	cell junction assembly	BP	192	14	0.0758617
GO:0042573	retinoic acid metabolic process	BP	21	3	0.0758677
GO:0030825	positive regulation of cGMP metabolic process	BP	21	3	0.0758677
GO:0031290	retinal ganglion cell axon guidance	BP	21	3	0.0758677
GO:0032469	endoplasmic reticulum calcium ion homeostasis	BP	21	3	0.0758677
GO:0090162	establishment of epithelial cell polarity	BP	21	3	0.0758677
GO:0048485	sympathetic nervous system development	BP	21	3	0.0758677
GO:0009067	aspartate family amino acid biosynthetic process	BP	21	3	0.0758677
GO:0043555	regulation of translation in response to stress	BP	21	3	0.0758677
GO:0001502	cartilage condensation	BP	21	3	0.0758677
GO:0098743	cell aggregation	BP	21	3	0.0758677
GO:0060972	left/right pattern formation	BP	21	3	0.0758677
GO:0090103	cochlea morphogenesis	BP	21	3	0.0758677
GO:0009226	nucleotide-sugar biosynthetic process	BP	21	3	0.0758677
GO:0039702	viral budding via host ESCRT complex	BP	21	3	0.0758677
GO:0019956	chemokine binding	MF	21	3	0.0758677
GO:0071214	cellular response to abiotic stimulus	BP	279	19	0.0760094
GO:0009986	cell surface	CC	739	44	0.0761606
GO:0042107	cytokine metabolic process	BP	109	9	0.0761729
GO:0050702	interleukin-1 beta secretion	BP	34	4	0.0768144
GO:0045494	photoreceptor cell maintenance	BP	34	4	0.0768144
GO:0030501	positive regulation of bone mineralization	BP	34	4	0.0768144
GO:0045124	regulation of bone resorption	BP	34	4	0.0768144
GO:0040019	positive regulation of embryonic development	BP	34	4	0.0768144
GO:0090311	regulation of protein deacetylation	BP	34	4	0.0768144
GO:0097502	mannosylation	BP	34	4	0.0768144
GO:0022604	regulation of cell morphogenesis	BP	460	29	0.0771057
GO:0030427	site of polarized growth	CC	142	11	0.0772642
GO:0019369	arachidonic acid metabolic process	BP	48	5	0.0773195
GO:0002763	positive regulation of myeloid leukocyte differentiation	BP	48	5	0.0773195
GO:0060291	long-term synaptic potentiation	BP	48	5	0.0773195
GO:0050953	sensory perception of light stimulus	BP	210	15	0.0779376
GO:0048644	muscle organ morphogenesis	BP	78	7	0.078128
GO:0009612	response to mechanical stimulus	BP	193	14	0.0784013
GO:0033116	endoplasmic reticulum-Golgi intermediate compartment membrane	CC	63	6	0.079045
GO:0043312	neutrophil degranulation	BP	10	2	0.0792785
GO:0007440	foregut morphogenesis	BP	10	2	0.0792785
GO:0045760	positive regulation of action potential	BP	10	2	0.0792785
GO:0045006	DNA deamination	BP	10	2	0.0792785
GO:0046541	saliva secretion	BP	10	2	0.0792785
GO:0060456	positive regulation of digestive system process	BP	10	2	0.0792785
GO:0061140	lung secretory cell differentiation	BP	10	2	0.0792785
GO:2000650	negative regulation of sodium ion transmembrane transporter activity	BP	10	2	0.0792785
GO:0010826	negative regulation of centrosome duplication	BP	10	2	0.0792785
GO:0046606	negative regulation of centrosome cycle	BP	10	2	0.0792785
GO:0019371	cyclooxygenase pathway	BP	10	2	0.0792785
GO:0006655	phosphatidylglycerol biosynthetic process	BP	10	2	0.0792785
GO:0060346	bone trabecula formation	BP	10	2	0.0792785
GO:0002551	mast cell chemotaxis	BP	10	2	0.0792785
GO:1900273	positive regulation of long-term synaptic potentiation	BP	10	2	0.0792785
GO:0018065	protein-cofactor linkage	BP	10	2	0.0792785
GO:0001840	neural plate development	BP	10	2	0.0792785
GO:0060856	establishment of blood-brain barrier	BP	10	2	0.0792785
GO:0070601	centromeric sister chromatid cohesion	BP	10	2	0.0792785
GO:0031223	auditory behavior	BP	10	2	0.0792785
GO:0048845	venous blood vessel morphogenesis	BP	10	2	0.0792785
GO:0002328	pro-B cell differentiation	BP	10	2	0.0792785
GO:0038003	opioid receptor signaling pathway	BP	10	2	0.0792785
GO:0061469	regulation of type B pancreatic cell proliferation	BP	10	2	0.0792785
GO:0019081	viral translation	BP	10	2	0.0792785
GO:0070971	endoplasmic reticulum exit site	CC	10	2	0.0792785
GO:0031588	nucleotide-activated protein kinase complex	CC	10	2	0.0792785
GO:0016868	intramolecular transferase activity phosphotransferases	MF	10	2	0.0792785
GO:0086080	protein binding involved in heterotypic cell-cell adhesion	MF	10	2	0.0792785
GO:0005172	vascular endothelial growth factor receptor binding	MF	10	2	0.0792785
GO:0016892	endoribonuclease activity producing 3'-phosphomonoesters	MF	10	2	0.0792785
GO:0002688	regulation of leukocyte chemotaxis	BP	94	8	0.0796056
GO:0045321	leukocyte activation	BP	723	43	0.0798661
GO:1990138	neuron projection extension	BP	143	11	0.080296
GO:0000187	activation of MAPK activity	BP	143	11	0.080296
GO:1990778	protein localization to cell periphery	BP	211	15	0.0804056
GO:0043406	positive regulation of MAP kinase activity	BP	211	15	0.0804056
GO:0006732	coenzyme metabolic process	BP	299	20	0.0806918
GO:0005261	cation channel activity	MF	299	20	0.0806918
GO:0034330	cell junction organization	BP	246	17	0.0807994
GO:0045785	positive regulation of cell adhesion	BP	371	24	0.0808907
GO:0010556	regulation of macromolecule biosynthetic process	BP	4021	209	0.0816716
GO:1901657	glycosyl compound metabolic process	BP	408	26	0.0820361
GO:0061351	neural precursor cell proliferation	BP	127	10	0.0820385
GO:0006661	phosphatidylinositol biosynthetic process	BP	127	10	0.0820385
GO:0016491	oxidoreductase activity	MF	725	43	0.0825191
GO:0032655	regulation of interleukin-12 production	BP	49	5	0.0829008
GO:0048747	muscle fiber development	BP	49	5	0.0829008
GO:0036092	phosphatidylinositol-3-phosphate biosynthetic process	BP	49	5	0.0829008
GO:0001725	stress fiber	CC	49	5	0.0829008
GO:0097517	contractile actin filament bundle	CC	49	5	0.0829008
GO:0008219	cell death	BP	1892	103	0.0829248
GO:0097223	sperm part	CC	144	11	0.0834011
GO:0005796	Golgi lumen	CC	95	8	0.0834953
GO:0032094	response to food	BP	35	4	0.0836109
GO:0031076	embryonic camera-type eye development	BP	35	4	0.0836109
GO:0002090	regulation of receptor internalization	BP	35	4	0.0836109
GO:0010824	regulation of centrosome duplication	BP	35	4	0.0836109
[truncated: 19,162 more rows]
[truncated: 1 more columns]

## Sheet: Cluster 2 GOTERM
Category	Term	Ont	N	DE	P.DE
GO:0044444	cytoplasmic part	CC	7919	976	1.72143e-50
GO:0044421	extracellular region part	CC	3819	569	1.55009e-46
GO:0031982	vesicle	CC	3687	548	4.85704e-44
GO:0005576	extracellular region	CC	4531	630	3.67086e-42
GO:0031988	membrane-bounded vesicle	CC	3550	528	3.88349e-42
GO:0012505	endomembrane system	CC	3787	549	9.85051e-41
GO:0005737	cytoplasm	CC	10548	1165	1.26651e-39
GO:0043230	extracellular organelle	CC	2780	426	1.00586e-35
GO:1903561	extracellular vesicle	CC	2779	425	2.04364e-35
GO:0070062	extracellular exosome	CC	2765	423	2.93505e-35
GO:0030198	extracellular matrix organization	BP	330	104	1.18619e-32
GO:0043062	extracellular structure organization	BP	331	104	1.58772e-32
GO:0005783	endoplasmic reticulum	CC	1627	272	8.90463e-28
GO:0044432	endoplasmic reticulum part	CC	1163	210	1.23462e-25
GO:0044710	single-organism metabolic process	BP	4018	519	1.16389e-24
GO:0010033	response to organic substance	BP	2741	386	2.50421e-24
GO:0016020	membrane	CC	8982	973	2.58566e-23
GO:0031410	cytoplasmic vesicle	CC	1255	215	3.44073e-23
GO:0097708	intracellular vesicle	CC	1257	215	4.23511e-23
GO:0051179	localization	BP	5684	674	5.3159e-23
GO:0044707	single-multicellular organism process	BP	5802	683	1.62839e-22
GO:0070887	cellular response to chemical stimulus	BP	2586	363	1.79234e-22
GO:0044425	membrane part	CC	6562	753	2.27515e-22
GO:0016023	cytoplasmic membrane-bounded vesicle	CC	1158	200	5.36631e-22
GO:0007166	cell surface receptor signaling pathway	BP	2595	362	6.4139e-22
GO:0001944	vasculature development	BP	593	126	1.35281e-21
GO:0071310	cellular response to organic substance	BP	2134	311	1.41738e-21
GO:0048584	positive regulation of response to stimulus	BP	1928	288	1.65522e-21
GO:0072358	cardiovascular system development	BP	600	126	3.90533e-21
GO:0044699	single-organism process	BP	12914	1286	6.07356e-21
GO:0009653	anatomical structure morphogenesis	BP	2507	348	1.24286e-20
GO:0051270	regulation of cellular component movement	BP	770	147	2.41789e-20
GO:0048731	system development	BP	4167	516	2.90984e-20
GO:0048856	anatomical structure development	BP	5307	626	3.22824e-20
GO:0006950	response to stress	BP	3557	455	3.27506e-20
GO:0005773	vacuole	CC	1184	198	4.08327e-20
GO:0022610	biological adhesion	BP	1689	256	6.70224e-20
GO:0023051	regulation of signaling	BP	2984	395	7.83225e-20
GO:0072359	circulatory system development	BP	913	164	7.95429e-20
GO:0005794	Golgi apparatus	CC	1439	227	9.23046e-20
GO:0001568	blood vessel development	BP	572	119	1.14843e-19
GO:0001525	angiogenesis	BP	411	96	1.25555e-19
GO:0048583	regulation of response to stimulus	BP	3503	447	1.36477e-19
GO:0007155	cell adhesion	BP	1683	254	1.7229e-19
GO:0032963	collagen metabolic process	BP	108	44	2.09782e-19
GO:0044259	multicellular organismal macromolecule metabolic process	BP	113	45	2.41341e-19
GO:0005615	extracellular space	CC	1381	219	2.42449e-19
GO:2000145	regulation of cell motility	BP	713	137	2.89755e-19
GO:0032502	developmental process	BP	5709	659	3.70467e-19
GO:0010646	regulation of cell communication	BP	2933	387	3.85894e-19
GO:0031012	extracellular matrix	CC	523	111	4.27181e-19
GO:0007275	multicellular organism development	BP	4736	566	4.89452e-19
GO:0030334	regulation of cell migration	BP	664	130	4.95471e-19
GO:0044767	single-organism developmental process	BP	5606	648	7.07659e-19
GO:0006810	transport	BP	4509	543	8.34557e-19
GO:0005789	endoplasmic reticulum membrane	CC	985	170	1.0324e-18
GO:0051239	regulation of multicellular organismal process	BP	2576	348	1.12011e-18
GO:0040012	regulation of locomotion	BP	742	139	1.58139e-18
GO:0009966	regulation of signal transduction	BP	2646	354	2.47378e-18
GO:0031090	organelle membrane	CC	2570	346	2.53543e-18
GO:0048514	blood vessel morphogenesis	BP	487	104	3.69778e-18
GO:0051234	establishment of localization	BP	4635	552	4.10956e-18
GO:0042175	nuclear outer membrane-endoplasmic reticulum membrane network	CC	1004	170	7.21084e-18
GO:0042127	regulation of cell proliferation	BP	1482	226	7.25454e-18
GO:0005102	receptor binding	MF	1439	221	7.79123e-18
GO:0009967	positive regulation of signal transduction	BP	1370	213	8.31034e-18
GO:0050896	response to stimulus	BP	8081	868	8.46836e-18
GO:0032879	regulation of localization	BP	2384	324	1.06537e-17
GO:0006928	movement of cell or subcellular component	BP	1741	254	1.48943e-17
GO:0044236	multicellular organism metabolic process	BP	129	46	1.69968e-17
GO:0009986	cell surface	CC	739	136	1.8069e-17
GO:0016477	cell migration	BP	1190	191	1.86217e-17
GO:0044763	single-organism cellular process	BP	11664	1170	2.90514e-17
GO:0023056	positive regulation of signaling	BP	1501	226	3.31764e-17
GO:1902533	positive regulation of intracellular signal transduction	BP	872	152	3.38486e-17
GO:0010647	positive regulation of cell communication	BP	1494	225	3.83933e-17
GO:0008219	cell death	BP	1892	269	4.18361e-17
GO:0048518	positive regulation of biological process	BP	5094	591	4.34651e-17
GO:0016192	vesicle-mediated transport	BP	1417	216	4.63478e-17
GO:1902578	single-organism localization	BP	2918	376	7.93023e-17
GO:0008283	cell proliferation	BP	1899	268	1.27896e-16
GO:0098588	bounding membrane of organelle	CC	1709	247	1.46748e-16
GO:0005578	proteinaceous extracellular matrix	CC	356	82	1.47118e-16
GO:0040011	locomotion	BP	1494	223	1.53232e-16
GO:0006915	apoptotic process	BP	1765	252	3.08892e-16
GO:0048870	cell motility	BP	1309	201	3.10023e-16
GO:0051674	localization of cell	BP	1309	201	3.10023e-16
GO:0012501	programmed cell death	BP	1785	254	3.4807e-16
GO:0031589	cell-substrate adhesion	BP	301	73	3.8251e-16
GO:0042981	regulation of apoptotic process	BP	1358	206	4.71289e-16
GO:1901700	response to oxygen-containing compound	BP	1411	212	4.74203e-16
GO:0005924	cell-substrate adherens junction	CC	391	86	5.09866e-16
GO:0044765	single-organism transport	BP	2700	350	5.70491e-16
GO:0043067	regulation of programmed cell death	BP	1370	207	6.07342e-16
GO:0048522	positive regulation of cellular process	BP	4580	536	6.89387e-16
GO:0010941	regulation of cell death	BP	1462	217	7.89103e-16
GO:0030055	cell-substrate junction	CC	395	86	9.6731e-16
GO:0005925	focal adhesion	CC	388	85	9.71547e-16
GO:0005518	collagen binding	MF	64	30	1.08226e-15
GO:0032270	positive regulation of cellular protein metabolic process	BP	1380	207	1.32938e-15
GO:0098805	whole membrane	CC	1336	202	1.34318e-15
GO:0044700	single organism signaling	BP	6064	674	1.41603e-15
GO:0023052	signaling	BP	6071	674	1.86891e-15
GO:0009719	response to endogenous stimulus	BP	1501	220	1.96459e-15
GO:0065008	regulation of biological quality	BP	3426	421	2.04055e-15
GO:0044437	vacuolar part	CC	702	126	2.16596e-15
GO:0005912	adherens junction	CC	687	124	2.37669e-15
GO:0042221	response to chemical	BP	4014	478	3.14677e-15
GO:0007165	signal transduction	BP	5623	631	3.47149e-15
GO:0007154	cell communication	BP	6089	673	5.78447e-15
GO:0070161	anchoring junction	CC	704	125	6.50262e-15
GO:0030335	positive regulation of cell migration	BP	386	83	6.55894e-15
GO:0051247	positive regulation of protein metabolic process	BP	1464	214	6.77894e-15
GO:0051716	cellular response to stimulus	BP	6756	733	8.8782e-15
GO:0007167	enzyme linked receptor protein signaling pathway	BP	946	154	9.90282e-15
GO:2000147	positive regulation of cell motility	BP	399	84	1.60177e-14
GO:0048585	negative regulation of response to stimulus	BP	1331	197	2.76126e-14
GO:0040017	positive regulation of locomotion	BP	411	85	3.23522e-14
GO:0005178	integrin binding	MF	105	37	3.69247e-14
GO:0009888	tissue development	BP	1709	238	4.19677e-14
GO:0005515	protein binding	MF	8879	917	5.8811e-14
GO:0002376	immune system process	BP	2348	305	5.98713e-14
GO:0098796	membrane protein complex	CC	1026	161	6.08001e-14
GO:0023057	negative regulation of signaling	BP	1166	177	6.73778e-14
GO:0051272	positive regulation of cellular component movement	BP	409	84	6.90991e-14
GO:2000026	regulation of multicellular organismal development	BP	1671	233	7.14901e-14
GO:0050793	regulation of developmental process	BP	2227	292	7.48002e-14
GO:0010648	negative regulation of cell communication	BP	1162	176	9.81148e-14
GO:0022617	extracellular matrix disassembly	BP	88	33	1.1415e-13
GO:1902531	regulation of intracellular signal transduction	BP	1662	231	1.32413e-13
GO:0065009	regulation of molecular function	BP	2796	349	1.56952e-13
GO:0000323	lytic vacuole	CC	530	99	2.04734e-13
GO:0005764	lysosome	CC	530	99	2.04734e-13
GO:0051246	regulation of protein metabolic process	BP	2458	314	2.06074e-13
GO:0042327	positive regulation of phosphorylation	BP	906	145	2.53218e-13
GO:0032403	protein complex binding	MF	748	126	2.68352e-13
GO:0030574	collagen catabolic process	BP	67	28	3.47573e-13
GO:1901701	cellular response to oxygen-containing compound	BP	894	143	3.91969e-13
GO:0048513	animal organ development	BP	3035	371	4.20327e-13
GO:0009968	negative regulation of signal transduction	BP	1067	163	4.29337e-13
GO:0044431	Golgi apparatus part	CC	891	142	6.34558e-13
GO:0046903	secretion	BP	1055	161	6.62205e-13
GO:0048523	negative regulation of cellular process	BP	4169	481	6.75583e-13
GO:0051240	positive regulation of multicellular organismal process	BP	1385	198	7.04182e-13
GO:0032940	secretion by cell	BP	927	146	7.49193e-13
GO:0048519	negative regulation of biological process	BP	4486	511	7.81161e-13
GO:0006952	defense response	BP	1461	206	8.74231e-13
GO:0016310	phosphorylation	BP	2176	282	9.15351e-13
GO:0008284	positive regulation of cell proliferation	BP	812	132	1.02674e-12
GO:0007160	cell-matrix adhesion	BP	193	50	1.23246e-12
GO:0052547	regulation of peptidase activity	BP	386	78	1.31678e-12
GO:0001934	positive regulation of protein phosphorylation	BP	868	138	1.65276e-12
GO:0001932	regulation of protein phosphorylation	BP	1262	183	1.66929e-12
GO:0030162	regulation of proteolysis	BP	688	116	2.34576e-12
GO:0010562	positive regulation of phosphorus metabolic process	BP	1020	155	2.61599e-12
GO:0045937	positive regulation of phosphate metabolic process	BP	1020	155	2.61599e-12
GO:0032501	multicellular organismal process	BP	6828	725	2.6192e-12
GO:0044459	plasma membrane part	CC	2567	320	2.686e-12
GO:0035556	intracellular signal transduction	BP	2588	322	2.86086e-12
GO:0045765	regulation of angiogenesis	BP	210	52	2.91803e-12
GO:0042325	regulation of phosphorylation	BP	1352	192	3.04958e-12
GO:0032268	regulation of cellular protein metabolic process	BP	2296	292	3.14708e-12
GO:0051049	regulation of transport	BP	1725	232	3.71924e-12
GO:0043227	membrane-bounded organelle	CC	11961	1167	4.09005e-12
GO:0031224	intrinsic component of membrane	CC	5456	598	4.2382e-12
GO:0051174	regulation of phosphorus metabolic process	BP	1579	216	4.5986e-12
GO:0051050	positive regulation of transport	BP	889	139	4.79066e-12
GO:0009605	response to external stimulus	BP	1996	260	5.05483e-12
GO:0071495	cellular response to endogenous stimulus	BP	1153	169	5.36679e-12
GO:0071944	cell periphery	CC	5120	566	5.48621e-12
GO:0044243	multicellular organism catabolic process	BP	74	28	6.39213e-12
GO:0019220	regulation of phosphate metabolic process	BP	1578	215	7.66614e-12
GO:0099503	secretory vesicle	CC	453	85	8.41215e-12
GO:0052548	regulation of endopeptidase activity	BP	363	73	8.86352e-12
GO:0030155	regulation of cell adhesion	BP	623	106	1.23172e-11
GO:1901342	regulation of vasculature development	BP	232	54	1.506e-11
GO:0048646	anatomical structure formation involved in morphogenesis	BP	1144	166	1.92603e-11
GO:0005774	vacuolar membrane	CC	596	102	2.14723e-11
GO:0005788	endoplasmic reticulum lumen	CC	201	49	2.26362e-11
GO:0016021	integral component of membrane	CC	5329	581	3.00755e-11
GO:0044433	cytoplasmic vesicle part	CC	610	103	3.84525e-11
GO:0070482	response to oxygen levels	BP	301	63	4.13759e-11
GO:0009611	response to wounding	BP	628	105	4.48832e-11
GO:0050840	extracellular matrix binding	MF	51	22	5.53349e-11
GO:0002576	platelet degranulation	BP	107	33	5.60784e-11
GO:0050900	leukocyte migration	BP	362	71	5.69253e-11
GO:0050790	regulation of catalytic activity	BP	2308	287	6.60705e-11
GO:0033036	macromolecule localization	BP	2749	331	7.99068e-11
GO:0045766	positive regulation of angiogenesis	BP	120	35	8.47239e-11
GO:0019838	growth factor binding	MF	126	36	8.74668e-11
GO:0048869	cellular developmental process	BP	3868	440	9.51428e-11
GO:0030141	secretory granule	CC	345	68	1.15959e-10
GO:0051094	positive regulation of developmental process	BP	1152	164	1.16419e-10
GO:0007169	transmembrane receptor protein tyrosine kinase signaling pathway	BP	655	107	1.19591e-10
GO:1901135	carbohydrate derivative metabolic process	BP	1207	170	1.20773e-10
GO:0009887	animal organ morphogenesis	BP	965	143	1.23116e-10
GO:0022603	regulation of anatomical structure morphogenesis	BP	957	142	1.30929e-10
GO:0044712	single-organism catabolic process	BP	826	127	1.31296e-10
GO:0042060	wound healing	BP	525	91	1.34147e-10
GO:0097190	apoptotic signaling pathway	BP	567	96	1.55607e-10
GO:0071702	organic substance transport	BP	2584	313	1.56032e-10
GO:0005886	plasma membrane	CC	5014	547	1.65609e-10
GO:0002685	regulation of leukocyte migration	BP	147	39	1.69135e-10
GO:0043065	positive regulation of apoptotic process	BP	552	94	1.7695e-10
GO:0030154	cell differentiation	BP	3537	406	2.16766e-10
GO:0006954	inflammatory response	BP	645	105	2.20277e-10
GO:0010942	positive regulation of cell death	BP	587	98	2.21048e-10
GO:1904018	positive regulation of vasculature development	BP	136	37	2.26884e-10
GO:0061041	regulation of wound healing	BP	124	35	2.30373e-10
GO:0006793	phosphorus metabolic process	BP	3008	354	2.51631e-10
GO:0010952	positive regulation of peptidase activity	BP	149	39	2.61627e-10
GO:0048471	perinuclear region of cytoplasm	CC	622	102	2.64603e-10
GO:0002682	regulation of immune system process	BP	1302	179	2.68323e-10
GO:0006468	protein phosphorylation	BP	1822	234	2.87383e-10
GO:0043068	positive regulation of programmed cell death	BP	557	94	2.90142e-10
GO:0006796	phosphate-containing compound metabolic process	BP	3002	353	2.98642e-10
GO:0043226	organelle	CC	12881	1231	2.98879e-10
GO:0060548	negative regulation of cell death	BP	865	130	3.61224e-10
GO:0008285	negative regulation of cell proliferation	BP	626	102	3.81867e-10
GO:0045055	regulated exocytosis	BP	274	57	4.46462e-10
GO:0008104	protein localization	BP	2379	290	4.56891e-10
GO:0030054	cell junction	CC	1358	184	4.83124e-10
GO:0051130	positive regulation of cellular component organization	BP	1119	158	4.8528e-10
GO:0098552	side of membrane	CC	426	77	5.05493e-10
GO:0005768	endosome	CC	791	121	5.0722e-10
GO:0045862	positive regulation of proteolysis	BP	349	67	5.13002e-10
GO:0090066	regulation of anatomical structure size	BP	466	82	5.30872e-10
GO:0032101	regulation of response to external stimulus	BP	690	109	5.95709e-10
GO:0006914	autophagy	BP	428	77	6.3217e-10
GO:0009725	response to hormone	BP	821	124	6.89781e-10
GO:0000139	Golgi membrane	CC	684	108	7.36871e-10
GO:0097191	extrinsic apoptotic signaling pathway	BP	221	49	7.81305e-10
GO:0050839	cell adhesion molecule binding	MF	454	80	8.07984e-10
GO:0051128	regulation of cellular component organization	BP	2194	270	8.21121e-10
GO:0051241	negative regulation of multicellular organismal process	BP	974	141	8.47159e-10
GO:0002684	positive regulation of immune system process	BP	903	133	8.57861e-10
GO:0051248	negative regulation of protein metabolic process	BP	1020	146	9.16704e-10
GO:0045184	establishment of protein localization	BP	1952	245	9.44048e-10
GO:0031401	positive regulation of protein modification process	BP	1111	156	9.45979e-10
GO:0010243	response to organonitrogen compound	BP	756	116	9.78639e-10
GO:1903034	regulation of response to wounding	BP	143	37	1.06219e-09
GO:0043069	negative regulation of programmed cell death	BP	801	121	1.10977e-09
GO:0044420	extracellular matrix component	CC	125	34	1.21579e-09
GO:0006887	exocytosis	BP	389	71	1.55896e-09
GO:0043066	negative regulation of apoptotic process	BP	790	119	1.82217e-09
GO:0023014	signal transduction by protein phosphorylation	BP	887	130	1.84601e-09
GO:0044092	negative regulation of molecular function	BP	1058	149	1.89521e-09
GO:1901698	response to nitrogen compound	BP	861	127	1.92311e-09
GO:0001666	response to hypoxia	BP	277	56	1.92551e-09
GO:0043410	positive regulation of MAPK cascade	BP	471	81	2.06024e-09
GO:0036293	response to decreased oxygen levels	BP	285	57	2.10265e-09
GO:0006508	proteolysis	BP	1625	209	2.68521e-09
GO:0010810	regulation of cell-substrate adhesion	BP	174	41	2.83543e-09
GO:0043236	laminin binding	MF	29	15	2.85534e-09
GO:0005509	calcium ion binding	MF	692	107	2.91684e-09
GO:0031399	regulation of protein modification process	BP	1627	209	2.97854e-09
GO:0051336	regulation of hydrolase activity	BP	1334	178	3.13834e-09
GO:0000165	MAPK cascade	BP	851	125	3.36303e-09
GO:0007229	integrin-mediated signaling pathway	BP	88	27	3.50319e-09
GO:0034097	response to cytokine	BP	782	117	3.74848e-09
GO:0002687	positive regulation of leukocyte migration	BP	106	30	4.0872e-09
GO:0044093	positive regulation of molecular function	BP	1803	226	5.38632e-09
GO:0015031	protein transport	BP	1795	225	5.85338e-09
GO:0006897	endocytosis	BP	625	98	6.66279e-09
GO:0030199	collagen fibril organization	BP	39	17	7.06312e-09
GO:0050730	regulation of peptidyl-tyrosine phosphorylation	BP	214	46	7.24123e-09
GO:1901137	carbohydrate derivative biosynthetic process	BP	739	111	7.6872e-09
GO:0044267	cellular protein metabolic process	BP	4779	514	7.78738e-09
GO:0030029	actin filament-based process	BP	637	99	8.87381e-09
GO:0019725	cellular homeostasis	BP	812	119	9.31783e-09
GO:0034774	secretory granule lumen	CC	86	26	9.62005e-09
GO:2001056	positive regulation of cysteine-type endopeptidase activity	BP	122	32	9.78846e-09
GO:2000116	regulation of cysteine-type endopeptidase activity	BP	216	46	9.84278e-09
GO:0043408	regulation of MAPK cascade	BP	656	101	1.02933e-08
GO:0043235	receptor complex	CC	320	60	1.02962e-08
GO:0010950	positive regulation of endopeptidase activity	BP	135	34	1.05125e-08
GO:0071496	cellular response to external stimulus	BP	254	51	1.27882e-08
GO:0031093	platelet alpha granule lumen	CC	55	20	1.46161e-08
GO:0022411	cellular component disassembly	BP	525	85	1.54816e-08
GO:0045785	positive regulation of cell adhesion	BP	371	66	1.6739e-08
GO:0031983	vesicle lumen	CC	106	29	1.71418e-08
GO:0005793	endoplasmic reticulum-Golgi intermediate compartment	CC	106	29	1.71418e-08
GO:0032970	regulation of actin filament-based process	BP	317	59	1.80358e-08
GO:0006955	immune response	BP	1509	193	1.83169e-08
GO:0045595	regulation of cell differentiation	BP	1490	191	1.84758e-08
GO:0043281	regulation of cysteine-type endopeptidase activity involved in apoptotic process	BP	192	42	1.893e-08
GO:0071822	protein complex subunit organization	BP	1616	204	1.93342e-08
GO:0001816	cytokine production	BP	613	95	2.05513e-08
GO:0043280	positive regulation of cysteine-type endopeptidase activity involved in apoptotic process	BP	113	30	2.0812e-08
GO:0030133	transport vesicle	CC	342	62	2.19949e-08
GO:0005775	vacuolar lumen	CC	114	30	2.59163e-08
GO:0080134	regulation of response to stress	BP	1241	164	2.72794e-08
GO:0098636	protein complex involved in cell adhesion	CC	33	15	2.7281e-08
GO:0034976	response to endoplasmic reticulum stress	BP	260	51	2.85806e-08
GO:0031252	cell leading edge	CC	345	62	3.07736e-08
GO:0071345	cellular response to cytokine stimulus	BP	688	103	3.21669e-08
GO:0001667	ameboidal-type cell migration	BP	322	59	3.23796e-08
GO:0032103	positive regulation of response to external stimulus	BP	261	51	3.2572e-08
GO:0042995	cell projection	CC	1793	221	3.33795e-08
GO:0009897	external side of plasma membrane	CC	232	47	3.53612e-08
GO:0019221	cytokine-mediated signaling pathway	BP	543	86	3.5838e-08
GO:0030003	cellular cation homeostasis	BP	552	87	3.74761e-08
GO:0030036	actin cytoskeleton organization	BP	552	87	3.74761e-08
GO:0031091	platelet alpha granule	CC	74	23	3.81531e-08
GO:0009100	glycoprotein metabolic process	BP	387	67	3.91606e-08
GO:0019899	enzyme binding	MF	1748	216	4.00032e-08
GO:0048771	tissue remodeling	BP	142	34	4.09729e-08
GO:0016043	cellular component organization	BP	5870	609	4.46382e-08
GO:0050921	positive regulation of chemotaxis	BP	117	30	4.91362e-08
GO:0019538	protein metabolic process	BP	5295	556	4.95231e-08
GO:0008305	integrin complex	CC	30	14	5.2646e-08
GO:0060205	cytoplasmic membrane-bounded vesicle lumen	CC	105	28	5.50338e-08
GO:0001817	regulation of cytokine production	BP	557	87	5.69522e-08
GO:0050673	epithelial cell proliferation	BP	336	60	6.47873e-08
GO:0042470	melanosome	CC	106	28	6.86361e-08
GO:0048770	pigment granule	CC	106	28	6.86361e-08
GO:0050818	regulation of coagulation	BP	88	25	7.28348e-08
GO:0002688	regulation of leukocyte chemotaxis	BP	94	26	7.29594e-08
GO:0009628	response to abiotic stimulus	BP	1064	143	8.18118e-08
GO:1901699	cellular response to nitrogen compound	BP	536	84	8.32008e-08
GO:0010506	regulation of autophagy	BP	261	50	8.52677e-08
GO:0007015	actin filament organization	BP	323	58	8.77269e-08
GO:0032269	negative regulation of cellular protein metabolic process	BP	964	132	9.08225e-08
GO:0051701	interaction with host	BP	160	36	9.09068e-08
GO:0071417	cellular response to organonitrogen compound	BP	462	75	9.75312e-08
GO:0048468	cell development	BP	1827	222	9.8266e-08
GO:1901654	response to ketone	BP	161	36	1.07409e-07
GO:0002690	positive regulation of leukocyte chemotaxis	BP	78	23	1.13401e-07
GO:0098771	inorganic ion homeostasis	BP	635	95	1.14981e-07
GO:0006873	cellular ion homeostasis	BP	566	87	1.18472e-07
GO:0071363	cellular response to growth factor stimulus	BP	592	90	1.19456e-07
GO:0005622	intracellular	CC	13930	1299	1.19843e-07
GO:0055082	cellular chemical homeostasis	BP	698	102	1.27366e-07
GO:0001935	endothelial cell proliferation	BP	109	28	1.30541e-07
GO:0043086	negative regulation of catalytic activity	BP	815	115	1.33011e-07
GO:0098602	single organism cell adhesion	BP	762	109	1.42337e-07
GO:0043549	regulation of kinase activity	BP	762	109	1.42337e-07
GO:0044422	organelle part	CC	8240	817	1.45852e-07
GO:0044424	intracellular part	CC	13592	1271	1.47508e-07
GO:0098858	actin-based cell projection	CC	177	38	1.4866e-07
GO:0055080	cation homeostasis	BP	621	93	1.49301e-07
GO:0006979	response to oxidative stress	BP	376	64	1.49321e-07
GO:0043292	contractile fiber	CC	214	43	1.6985e-07
GO:0050801	ion homeostasis	BP	676	99	1.76214e-07
GO:0006919	activation of cysteine-type endopeptidase activity involved in apoptotic process	BP	80	23	1.89296e-07
GO:0032956	regulation of actin cytoskeleton organization	BP	283	52	1.90792e-07
GO:0005765	lysosomal membrane	CC	283	52	1.90792e-07
GO:0098852	lytic vacuole membrane	CC	283	52	1.90792e-07
GO:0051604	protein maturation	BP	260	49	1.92939e-07
GO:0044446	intracellular organelle part	CC	8059	800	1.94805e-07
GO:0044440	endosomal part	CC	429	70	2.12932e-07
GO:0090130	tissue migration	BP	231	45	2.26274e-07
GO:0048878	chemical homeostasis	BP	1026	137	2.27611e-07
GO:0018108	peptidyl-tyrosine phosphorylation	BP	356	61	2.29303e-07
GO:0010712	regulation of collagen metabolic process	BP	33	14	2.3068e-07
GO:0051051	negative regulation of transport	BP	430	70	2.33188e-07
GO:0005604	basement membrane	CC	93	25	2.36737e-07
GO:0043542	endothelial cell migration	BP	152	34	2.38065e-07
GO:0045121	membrane raft	CC	270	50	2.54732e-07
GO:0045859	regulation of protein kinase activity	BP	708	102	2.56159e-07
GO:0018212	peptidyl-tyrosine modification	BP	358	61	2.80257e-07
GO:0098857	membrane microdomain	CC	271	50	2.86444e-07
GO:0043005	neuron projection	CC	938	127	3.01792e-07
GO:0060341	regulation of cellular localization	BP	801	112	3.11366e-07
GO:0055114	oxidation-reduction process	BP	967	130	3.23497e-07
GO:0031226	intrinsic component of plasma membrane	CC	1668	203	3.3679e-07
GO:0002020	protease binding	MF	114	28	3.5833e-07
GO:0032964	collagen biosynthetic process	BP	34	14	3.60736e-07
GO:0044246	regulation of multicellular organismal metabolic process	BP	34	14	3.60736e-07
GO:0008083	growth factor activity	MF	162	35	3.87905e-07
GO:0048729	tissue morphogenesis	BP	609	90	4.30604e-07
GO:0051259	protein oligomerization	BP	454	72	4.41105e-07
GO:0003013	circulatory system process	BP	488	76	4.42712e-07
GO:0007599	hemostasis	BP	355	60	4.65158e-07
GO:0010631	epithelial cell migration	BP	222	43	4.91055e-07
GO:0005126	cytokine receptor binding	MF	268	49	4.97077e-07
GO:0030193	regulation of blood coagulation	BP	84	23	4.97585e-07
GO:1900046	regulation of hemostasis	BP	84	23	4.97585e-07
GO:0016049	cell growth	BP	481	75	5.02178e-07
GO:0050920	regulation of chemotaxis	BP	178	37	5.05049e-07
GO:0006935	chemotaxis	BP	534	81	5.62885e-07
GO:0035987	endodermal cell differentiation	BP	45	16	5.78789e-07
GO:0001501	skeletal system development	BP	483	75	5.91818e-07
GO:0042330	taxis	BP	535	81	6.08148e-07
GO:0001763	morphogenesis of a branching structure	BP	194	39	6.19097e-07
GO:0090287	regulation of cellular response to growth factor stimulus	BP	224	43	6.33352e-07
GO:0008015	blood circulation	BP	484	75	6.42105e-07
GO:0005575	cellular_component	CC	17942	1596	6.57218e-07
GO:2001233	regulation of apoptotic signaling pathway	BP	367	61	6.724e-07
GO:0051046	regulation of secretion	BP	651	94	6.87359e-07
GO:0090132	epithelium migration	BP	225	43	7.18152e-07
GO:0016485	protein processing	BP	233	44	7.54345e-07
GO:0070848	response to growth factor	BP	617	90	7.64921e-07
GO:0030016	myofibril	CC	203	40	7.68633e-07
GO:0003012	muscle system process	BP	385	63	7.72628e-07
GO:0045807	positive regulation of endocytosis	BP	105	26	7.84336e-07
GO:1904019	epithelial cell apoptotic process	BP	86	23	7.85258e-07
GO:0045851	pH reduction	BP	46	16	8.15961e-07
GO:0007162	negative regulation of cell adhesion	BP	211	41	8.23659e-07
GO:0050679	positive regulation of epithelial cell proliferation	BP	153	33	8.59526e-07
GO:0031227	intrinsic component of endoplasmic reticulum membrane	CC	146	32	8.61844e-07
GO:0061138	morphogenesis of a branching epithelium	BP	182	37	8.95466e-07
GO:0009893	positive regulation of metabolic process	BP	2954	327	9.08596e-07
GO:0071840	cellular component organization or biogenesis	BP	6020	612	9.25098e-07
GO:0008092	cytoskeletal protein binding	MF	837	114	9.27603e-07
GO:0005539	glycosaminoglycan binding	MF	205	40	9.99509e-07
GO:2001236	regulation of extrinsic apoptotic signaling pathway	BP	154	33	1.00377e-06
GO:0090303	positive regulation of wound healing	BP	47	16	1.13745e-06
GO:0030176	integral component of endoplasmic reticulum membrane	CC	141	31	1.18461e-06
GO:0032880	regulation of protein localization	BP	925	123	1.20549e-06
GO:0033554	cellular response to stress	BP	1728	206	1.2081e-06
GO:0003779	actin binding	MF	390	63	1.21434e-06
GO:0043202	lysosomal lumen	CC	88	23	1.21874e-06
GO:0043123	positive regulation of I-kappaB kinase/NF-kappaB signaling	BP	177	36	1.2374e-06
GO:0031325	positive regulation of cellular metabolic process	BP	2756	307	1.244e-06
GO:0007492	endoderm development	BP	76	21	1.31293e-06
GO:0005887	integral component of plasma membrane	CC	1602	193	1.36069e-06
GO:0045861	negative regulation of proteolysis	BP	301	52	1.36166e-06
GO:0007596	blood coagulation	BP	350	58	1.3879e-06
GO:0048660	regulation of smooth muscle cell proliferation	BP	108	26	1.39896e-06
GO:0045597	positive regulation of cell differentiation	BP	817	111	1.4599e-06
GO:0043122	regulation of I-kappaB kinase/NF-kappaB signaling	BP	231	43	1.49389e-06
GO:0001819	positive regulation of cytokine production	BP	376	61	1.5442e-06
GO:0006936	muscle contraction	BP	319	54	1.63784e-06
GO:0043085	positive regulation of catalytic activity	BP	1528	185	1.67618e-06
GO:0098589	membrane region	CC	344	57	1.71221e-06
GO:0006811	ion transport	BP	1411	173	1.73332e-06
GO:0060326	cell chemotaxis	BP	240	44	1.73448e-06
GO:0034613	cellular protein localization	BP	1559	188	1.7798e-06
GO:0032355	response to estradiol	BP	116	27	1.78595e-06
GO:0014070	response to organic cyclic compound	BP	867	116	1.80963e-06
GO:0070201	regulation of establishment of protein localization	BP	793	108	1.81113e-06
GO:0001706	endoderm formation	BP	54	17	1.84144e-06
GO:0044877	macromolecular complex binding	MF	1257	157	1.86544e-06
GO:0008625	extrinsic apoptotic signaling pathway via death domain receptors	BP	84	22	1.98945e-06
GO:0050817	coagulation	BP	354	58	2.01401e-06
GO:0048659	smooth muscle cell proliferation	BP	110	26	2.02777e-06
GO:0060627	regulation of vesicle-mediated transport	BP	413	65	2.07358e-06
GO:0050789	regulation of biological process	BP	10652	1016	2.11406e-06
GO:0016236	macroautophagy	BP	234	43	2.12602e-06
GO:0006687	glycosphingolipid metabolic process	BP	72	20	2.13253e-06
GO:0006461	protein complex assembly	BP	1387	170	2.19439e-06
GO:0070271	protein complex biogenesis	BP	1387	170	2.19439e-06
GO:0098802	plasma membrane receptor complex	CC	167	34	2.36361e-06
GO:0010604	positive regulation of macromolecule metabolic process	BP	2766	306	2.39536e-06
GO:0001818	negative regulation of cytokine production	BP	212	40	2.41716e-06
GO:0007044	cell-substrate junction assembly	BP	85	22	2.46543e-06
GO:0007178	transmembrane receptor protein serine/threonine kinase signaling pathway	BP	307	52	2.49107e-06
GO:0071675	regulation of mononuclear cell migration	BP	34	13	2.58136e-06
GO:0012506	vesicle membrane	CC	502	75	2.61686e-06
GO:0030100	regulation of endocytosis	BP	190	37	2.6366e-06
GO:0009894	regulation of catabolic process	BP	494	74	2.76275e-06
GO:1903530	regulation of secretion by cell	BP	600	86	2.76929e-06
GO:0070727	cellular macromolecule localization	BP	1570	188	2.81237e-06
GO:0015629	actin cytoskeleton	CC	451	69	2.83261e-06
GO:0030659	cytoplasmic vesicle membrane	CC	486	73	2.91478e-06
GO:0050878	regulation of body fluid levels	BP	495	74	2.97829e-06
GO:0031347	regulation of defense response	BP	647	91	3.17582e-06
GO:0051641	cellular localization	BP	2423	272	3.1766e-06
GO:0050731	positive regulation of peptidyl-tyrosine phosphorylation	BP	162	33	3.26735e-06
GO:0030203	glycosaminoglycan metabolic process	BP	162	33	3.26735e-06
GO:0051452	intracellular pH reduction	BP	45	15	3.3188e-06
GO:0003018	vascular process in circulatory system	BP	155	32	3.39453e-06
GO:1904035	regulation of epithelial cell apoptotic process	BP	62	18	3.4176e-06
GO:0030175	filopodium	CC	93	23	3.41895e-06
GO:0061134	peptidase regulator activity	MF	215	40	3.4714e-06
GO:0040007	growth	BP	926	121	3.53864e-06
GO:0051346	negative regulation of hydrolase activity	BP	394	62	3.56276e-06
GO:0010951	negative regulation of endopeptidase activity	BP	231	42	3.68188e-06
GO:0010812	negative regulation of cell-substrate adhesion	BP	51	16	3.88097e-06
GO:0030027	lamellipodium	CC	171	34	4.10316e-06
GO:0001933	negative regulation of protein phosphorylation	BP	379	60	4.19234e-06
GO:0042326	negative regulation of phosphorylation	BP	414	64	4.55202e-06
GO:0010038	response to metal ion	BP	297	50	4.61037e-06
GO:0019900	kinase binding	MF	590	84	4.70977e-06
GO:0008154	actin polymerization or depolymerization	BP	187	36	4.71042e-06
GO:0050678	regulation of epithelial cell proliferation	BP	281	48	4.71976e-06
GO:0001968	fibronectin binding	MF	26	11	4.79837e-06
GO:0007179	transforming growth factor beta receptor signaling pathway	BP	165	33	4.95414e-06
GO:0010466	negative regulation of peptidase activity	BP	242	43	5.22789e-06
GO:0007249	I-kappaB kinase/NF-kappaB signaling	BP	258	45	5.28911e-06
GO:0046031	ADP metabolic process	BP	76	20	5.30901e-06
GO:0051338	regulation of transferase activity	BP	915	119	5.35862e-06
GO:0010811	positive regulation of cell-substrate adhesion	BP	102	24	5.39015e-06
GO:0032535	regulation of cellular component size	BP	340	55	5.4333e-06
GO:1901652	response to peptide	BP	425	65	5.52228e-06
GO:0071260	cellular response to mechanical stimulus	BP	70	19	5.54044e-06
GO:0004857	enzyme inhibitor activity	MF	374	59	5.62377e-06
GO:0030260	entry into host cell	BP	116	26	5.78841e-06
GO:0044409	entry into host	BP	116	26	5.78841e-06
GO:0051806	entry into cell of other organism involved in symbiotic interaction	BP	116	26	5.78841e-06
GO:0051828	entry into other organism involved in symbiotic interaction	BP	116	26	5.78841e-06
GO:0050776	regulation of immune response	BP	860	113	5.79515e-06
GO:0070371	ERK1 and ERK2 cascade	BP	251	44	5.8622e-06
GO:0008150	biological_process	BP	16672	1503	6.10178e-06
GO:0060284	regulation of cell development	BP	768	103	6.23047e-06
GO:0006665	sphingolipid metabolic process	BP	152	31	6.24674e-06
GO:0044449	contractile fiber part	CC	197	37	6.34759e-06
GO:0065007	biological regulation	BP	11279	1065	6.41368e-06
GO:0010634	positive regulation of epithelial cell migration	BP	103	24	6.45394e-06
GO:0031400	negative regulation of protein modification process	BP	559	80	6.5051e-06
GO:1903036	positive regulation of response to wounding	BP	53	16	6.7908e-06
GO:0031300	intrinsic component of organelle membrane	CC	160	32	6.85221e-06
[truncated: 20,658 more rows]

## Sheet: Cluster 3 GOTERM
Category	Term	Ont	N	DE	P.DE
[truncated: 21,161 more rows]

[truncated: 2 more sheets: Cluster 4 GOTERM, Cluster 10 GOTERM]
