# Supplementary material for: Transcriptional landscape of myogenesis from human pluripotent stem cells reveals a key role of TWIST1 in maintenance of skeletal muscle progenitors
Source: eLife. 2020 Feb 3;9:e46981. doi: 10.7554/eLife.46981 (PMC6996923; doi:10.7554/eLife.46981)
Supplement: Supplementary file 4. [file elife-46981-supp4.xlsx]

## Sheet: Gene expression level
GeneID	Gene Name	Gene Locus	Gene Class	Gene Length	1A	1B	3A	3B
ENSG00000000003	TSPAN6	chrX:99883666-99894988	protein_coding	2968	11.7415	14.817	11.0936	11.7493
ENSG00000000005	TNMD	chrX:99839798-99854882	protein_coding	1610	0.6465	0.893	0.2832	0.8926
ENSG00000000419	DPM1	chr20:49551403-49575092	protein_coding	1207	40.721	33.1416	33.5743	33.7332
ENSG00000000457	SCYL3	chr1:169818771-169863408	protein_coding	6876	2.6394	2.8412	2.7552	2.1735
ENSG00000000460	C1orf112	chr1:169631244-169823221	protein_coding	6354	4.409	4.8448	4.8152	4.0408
ENSG00000000938	FGR	chr1:27938574-27961788	protein_coding	3474	0	0.0243	0	0.0552
ENSG00000000971	CFH	chr1:196621007-196716634	protein_coding	8144	11.8202	11.5163	21.888	13.0693
ENSG00000001036	FUCA2	chr6:143815947-143832827	protein_coding	3119	6.5007	7.1312	6.4639	6.5117
ENSG00000001084	GCLC	chr6:53362138-53481768	protein_coding	8463	2.5937	3.1978	2.8251	2.4225
ENSG00000001167	NFYA	chr6:41040683-41067715	protein_coding	3811	30.2116	29.3812	26.0653	30.0655
ENSG00000001460	STPG1	chr1:24683488-24743424	protein_coding	8514	0.2552	0.2682	0.357	0.2588
ENSG00000001461	NIPAL3	chr1:24742283-24799466	protein_coding	9404	0.5727	0.8274	0.7918	0.489
ENSG00000001497	LAS1L	chrX:64732461-64754655	protein_coding	5589	9.2314	9.6388	9.3715	10.5933
ENSG00000001561	ENPP4	chr6:46097729-46114436	protein_coding	4651	2.5981	2.2184	1.8079	2.7808
ENSG00000001617	SEMA3F	chr3:50192477-50226508	protein_coding	4826	2.3539	2.4884	3.0334	2.2829
ENSG00000001626	CFTR	chr7:117105837-117356025	protein_coding	8099	0	0.0104	0.0125	0
ENSG00000001629	ANKIB1	chr7:91875547-92030698	protein_coding	7130	13.9837	13.6404	12.6247	11.2195
ENSG00000001630	CYP51A1	chr7:91741464-91772266	protein_coding	4074	1.5886	1.7852	2.3375	2.1869
ENSG00000001631	KRIT1	chr7:91828282-91875480	protein_coding	6204	12.0075	11.7914	10.9328	11.9367
ENSG00000002016	RAD52	chr12:1021242-1099219	protein_coding	4190	3.9641	5.1267	3.5906	4.2528
ENSG00000002079	MYH16	chr7:98836416-98908753	pseudogene	6387	0.0071	0	0.0079	0
ENSG00000002330	BAD	chr11:64037301-64052176	protein_coding	1708	5.4585	5.0505	5.3384	4.319
ENSG00000002549	LAP3	chr4:17578814-17609595	protein_coding	3785	12.2083	11.3059	12.1653	14.1995
ENSG00000002586	CD99	chrX:2609219-2659350	protein_coding	3284	32.1106	27.1945	33.4256	30.5436
ENSG00000002587	HS3ST1	chr4:11394773-11431389	protein_coding	8166	0.0222	0.0207	0.0248	0.0352
ENSG00000002726	AOC1	chr7:150521714-150558592	protein_coding	3824	0	0	0	0
ENSG00000002745	WNT16	chr7:120965420-120981158	protein_coding	3261	0.1804	0.0778	0.0932	0.2644
ENSG00000002746	HECW1	chr7:43152197-43605600	protein_coding	13965	0.0065	0.0242	0.0073	0.0206
ENSG00000002822	MAD1L1	chr7:1855428-2272878	protein_coding	6955	5.7199	5.9947	6.6496	7.025
ENSG00000002834	LASP1	chr17:37026111-37078023	protein_coding	7061	18.2929	18.349	19.4988	14.1512
ENSG00000002919	SNX11	chr17:46180718-46200436	protein_coding	3606	2.3972	2.3453	1.9105	2.2317
ENSG00000002933	TMEM176A	chr7:150497490-150502208	protein_coding	3479	0.8456	0.8265	0.7135	0.4406
ENSG00000003056	M6PR	chr12:9092958-9102551	protein_coding	3777	15.8409	14.7556	17.6629	18.5923
ENSG00000003096	KLHL13	chrX:117031775-117251303	protein_coding	6983	8.1728	8.5988	4.7151	8.9588
ENSG00000003137	CYP26B1	chr2:72356366-72375167	protein_coding	5015	0.4512	0.2192	0.4949	0.3057
ENSG00000003147	ICA1	chr7:8152813-8302317	protein_coding	4891	0	0.0173	0.0104	0
ENSG00000003249	DBNDD1	chr16:90071272-90086536	protein_coding	3522	1.8761	2.1851	1.9848	2.0673
ENSG00000003393	ALS2	chr2:202565276-202645912	protein_coding	10381	7.7385	8.0082	7.2609	7.9366
ENSG00000003400	CASP10	chr2:202047603-202094129	protein_coding	7598	0.0417	0	0.0133	0
ENSG00000003402	CFLAR	chr2:201980826-202041410	protein_coding	22528	0.6288	0.8146	0.796	0.8335
ENSG00000003436	TFPI	chr2:188328956-188430487	protein_coding	11714	0.9273	0.9963	0.7914	0.229
ENSG00000003509	NDUFAF7	chr2:37458773-37480546	protein_coding	3651	7.1401	8.8022	8.394	7.6621
ENSG00000003756	RBM5	chr3:50126340-50156454	protein_coding	10368	21.9786	20.6696	19.3328	17.2422
ENSG00000003987	MTMR7	chr8:17155538-17271037	protein_coding	5692	0.0875	0.0297	0.0801	0.0337
ENSG00000003989	SLC7A2	chr8:17354596-17428082	protein_coding	7905	4.7405	4.5147	4.4856	5.0052
ENSG00000004059	ARF5	chr7:127228398-127231759	protein_coding	1871	28.9061	34.3978	31.0808	34.8698
ENSG00000004139	SARM1	chr17:26691377-26728065	protein_coding	8132	2.9552	3.4319	2.8342	2.5211
ENSG00000004142	POLDIP2	chr17:26673658-26684545	protein_coding	2662	23.2581	24.1449	26.241	26.8117
ENSG00000004399	PLXND1	chr3:129274017-129325661	protein_coding	9738	5.4144	6.5742	5.8884	4.7813
ENSG00000004455	AK2	chr1:33473584-33546597	protein_coding	5683	18.9856	18.8249	19.8235	16.3014
ENSG00000004468	CD38	chr4:15779897-15854853	protein_coding	6855	0.0198	0	0	0
ENSG00000004478	FKBP4	chr12:2904118-2914576	protein_coding	3958	24.47	26.2601	27.772	33.0153
ENSG00000004487	KDM1A	chr1:23345940-23410182	protein_coding	5447	64.2935	68.4701	65.6741	75.4881
ENSG00000004534	RBM6	chr3:49977439-50137478	protein_coding	7300	33.3484	27.5028	28.5473	28.4126
ENSG00000004660	CAMKK1	chr17:3763608-3798185	protein_coding	7424	0.7742	0.8999	1.2213	0.7485
ENSG00000004700	RECQL	chr12:21621844-21654603	protein_coding	3778	13.7164	13.3191	12.3353	10.2193
ENSG00000004766	CCDC132	chr7:92861652-92988338	protein_coding	7359	5.5719	5.137	4.3434	3.554
ENSG00000004776	HSPB6	chr19:36245468-36248980	protein_coding	1722	0.1051	0.0491	0.1177	0.1113
ENSG00000004777	ARHGAP33	chr19:36265433-36279724	protein_coding	5260	1.3595	1.9454	1.7334	1.6028
ENSG00000004779	NDUFAB1	chr16:23592322-23607677	protein_coding	1600	10.7488	13.3199	10.4793	11.7957
ENSG00000004799	PDK4	chr7:95212810-95225803	protein_coding	4519	0.1502	0.2059	0.5493	0.1484
ENSG00000004809	SLC22A16	chr6:110745889-110797844	protein_coding	3791	0	0	0	0
ENSG00000004838	ZMYND10	chr3:50378540-50384283	protein_coding	4009	0.3838	0.2742	0.2148	0.2868
ENSG00000004846	ABCB5	chr7:20654829-20816658	protein_coding	9257	0.0684	0.0731	0.0164	0.031
ENSG00000004848	ARX	chrX:25021810-25034065	protein_coding	2876	0	0	0	0.0666
ENSG00000004864	SLC25A13	chr7:95749531-95951459	protein_coding	3710	11.4914	11.4433	12.8618	14.5382
ENSG00000004866	ST7	chr7:116593291-116870157	protein_coding	6742	7.1962	7.8023	5.8755	7.8296
ENSG00000004897	CDC27	chr17:45195068-45266788	protein_coding	6824	37.0806	32.2965	38.2957	39.4918
ENSG00000004939	SLC4A1	chr17:42325752-42345509	protein_coding	5287	0.0086	0	0.0096	0.0181
ENSG00000004948	CALCR	chr7:93053798-93204042	protein_coding	4036	0	0.0419	0.0126	0.0237
ENSG00000004961	HCCS	chrX:11129420-11141198	protein_coding	2335	6.6288	5.5777	7.2674	7.5083
ENSG00000004975	DVL2	chr17:7128659-7137864	protein_coding	5350	8.5102	10.6543	8.7013	7.6105
ENSG00000005001	PRSS22	chr16:2902727-2908171	protein_coding	2387	0.019	0	0.0637	0
ENSG00000005007	UPF1	chr19:18942746-18979045	protein_coding	8600	4.5626	6.097	4.6532	4.9906
ENSG00000005020	SKAP2	chr7:26706680-27034858	protein_coding	5520	2.0497	2.1755	1.9913	2.638
ENSG00000005022	SLC25A5	chrX:118602362-118605282	protein_coding	1500	88.2532	87.5025	96.1435	76.4503
ENSG00000005059	CCDC109B	chr4:110481360-110609874	protein_coding	3558	1.3865	1.4975	1.5518	0.8078
ENSG00000005073	HOXA11	chr7:27221128-27224842	protein_coding	2307	0.7455	0.8065	2.3275	2.2424
ENSG00000005075	POLR2J	chr7:102113564-102119354	protein_coding	962	39.2832	26.2855	35.3322	45.6107
ENSG00000005100	DHX33	chr17:5344231-5372380	protein_coding	5872	5.5648	6.2794	5.7625	7.3255
ENSG00000005102	MEOX1	chr17:41717755-41739322	protein_coding	2707	1.0533	1.5621	2.2642	2.6189
ENSG00000005108	THSD7A	chr7:11409983-11871824	protein_coding	10923	0.4765	0.3794	0.4081	0.4473
ENSG00000005156	LIG3	chr17:33307512-33332083	protein_coding	8240	8.4639	8.5597	8.5388	9.4058
ENSG00000005175	RPAP3	chr12:48057069-48099844	protein_coding	3343	15.5418	14.4198	13.3798	16.4781
ENSG00000005187	ACSM3	chr16:20621564-20808903	protein_coding	5095	0.0533	0.0332	0.2287	0.3197
ENSG00000005189	AC004381.6	chr16:20817750-20860987	protein_coding	4111	1.1009	1.3372	1.4663	2.0041
ENSG00000005194	CIAPIN1	chr16:57462080-57481440	protein_coding	3509	12.2141	13.593	14.4069	12.8046
ENSG00000005206	SPPL2B	chr19:2328613-2355099	processed_transcript	7096	3.4696	3.8734	4.2617	4.3608
ENSG00000005238	FAM214B	chr9:35104108-35116338	protein_coding	6409	2.2738	2.2433	2.4265	2.0329
ENSG00000005243	COPZ2	chr17:46103532-46115392	protein_coding	1847	0.8331	1.0531	1.2616	0.5187
ENSG00000005249	PRKAR2B	chr7:106685093-106802256	protein_coding	4318	0.8699	1.1164	1.1614	0.9984
ENSG00000005302	MSL3	chrX:11776277-11793870	protein_coding	6494	5.0806	4.7924	5.3432	5.2076
ENSG00000005339	CREBBP	chr16:3775054-3930727	protein_coding	15068	8.7434	10.3216	7.2648	8.1955
ENSG00000005379	BZRAP1	chr17:56378591-56406152	protein_coding	11382	1.7694	1.9616	1.9894	1.4814
ENSG00000005381	MPO	chr17:56347216-56358296	protein_coding	3622	0	0	0	0
ENSG00000005421	PON1	chr7:94926987-95025673	protein_coding	2988	0	0	0.017	0.0321
ENSG00000005436	GCFC2	chr2:75879125-75938115	protein_coding	5465	5.855	6.2828	4.8292	5.4519
ENSG00000005448	WDR54	chr2:74648804-74652882	protein_coding	2860	4.5416	5.2043	6.7658	4.4551
ENSG00000005469	CROT	chr7:86974996-87029111	protein_coding	4979	1.9089	1.8684	2.1161	1.674
ENSG00000005471	ABCB4	chr7:87031012-87109751	protein_coding	7494	0.006	0	0.0406	0.0384
ENSG00000005483	KMT2E	chr7:104654625-104754808	protein_coding	9227	13.1894	12.4193	12.8024	12.9266
ENSG00000005486	RHBDD2	chr7:75471919-75518244	protein_coding	2441	7.7686	8.2457	8.031	8.2812
ENSG00000005513	SOX8	chr16:1031807-1036979	protein_coding	4432	18.0848	18.5094	14.8697	24.4694
ENSG00000005700	IBTK	chr6:82879699-82957471	protein_coding	8722	11.6284	10.7822	9.8848	10.7753
ENSG00000005801	ZNF195	chr11:3360490-3400448	protein_coding	5705	12.6849	14.0235	12.2443	12.2755
ENSG00000005810	MYCBP2	chr13:77618791-77901185	protein_coding	15943	12.3485	13.097	11.5367	11.255
ENSG00000005812	FBXL3	chr13:77566739-77601330	protein_coding	4651	10.0714	8.5643	9.214	7.7243
ENSG00000005844	ITGAL	chr16:30483978-30534506	protein_coding	6472	0.014	0	0.0391	0.0148
ENSG00000005882	PDK2	chr17:48172100-48189516	protein_coding	5481	5.8214	5.8942	7.6339	6.4672
ENSG00000005884	ITGA3	chr17:48133331-48167845	protein_coding	9802	3.2367	3.5202	4.4857	3.7433
ENSG00000005889	ZFX	chrX:24167289-24234372	protein_coding	9037	19.3262	19.8115	18.335	16.3363
ENSG00000005893	LAMP2	chrX:119561681-119603220	protein_coding	5617	12.9401	13.2645	13.888	12.0414
ENSG00000005955	GGNBP2	chr17:34900736-34946278	protein_coding	9729	9.9503	9.475	8.8929	8.6261
ENSG00000005961	ITGA2B	chr17:42449547-42466873	protein_coding	5551	0.1305	0.3352	0.1095	0.2071
ENSG00000005981	ASB4	chr7:95107755-95169544	protein_coding	4605	0.1376	0.1469	0.132	0.0624
ENSG00000006007	GDE1	chr16:19513014-19533467	protein_coding	4412	14.9048	14.4338	17.7041	13.8318
ENSG00000006015	C19orf60	chr19:18699494-18703146	protein_coding	3370	1.7727	2.1833	2.4651	2.8428
ENSG00000006016	CRLF1	chr19:18683029-18718551	protein_coding	3018	0	0.028	0.1007	0
ENSG00000006025	OSBPL7	chr17:45884737-45899200	protein_coding	6572	1.2809	1.5185	1.5107	1.6035
ENSG00000006042	TMEM98	chr17:31254927-31272124	protein_coding	5187	9.7374	11.4783	12.3928	10.7494
ENSG00000006047	YBX2	chr17:7191570-7197934	protein_coding	4618	0.3528	0.1831	0.2084	0.3942
ENSG00000006059	KRT33A	chr17:39502343-39507064	protein_coding	1287	0.0703	0	0	0
ENSG00000006062	MAP3K14	chr17:43340487-43394414	processed_transcript	5132	1.5874	1.582	1.145	1.3441
ENSG00000006071	ABCC8	chr11:17414431-17498449	protein_coding	6835	0.2251	0.1485	0.1112	0.1822
ENSG00000006074	CCL18	chr17:34391639-34399392	protein_coding	1397	0	0	0	0
ENSG00000006075	CCL3	chr17:34415601-34417515	protein_coding	1494	0	0	0	0
ENSG00000006114	SYNRG	chr17:35874899-35969544	protein_coding	14277	4.6377	5.035	4.3428	4.3348
ENSG00000006116	CACNG3	chr16:24266873-24374122	protein_coding	3088	0	0.1095	0	0
ENSG00000006118	TMEM132A	chr11:60691934-60704631	protein_coding	7271	10.8368	12.7362	10.6591	9.7766
ENSG00000006125	AP2B1	chr17:33905064-34053436	protein_coding	7797	19.8515	22.832	22.4463	19.3644
ENSG00000006128	TAC1	chr7:97361219-97369784	protein_coding	1888	0	0	0	0
ENSG00000006194	ZNF263	chr16:3313742-3351401	protein_coding	9329	4.502	4.995	4.105	4.4877
ENSG00000006210	CX3CL1	chr16:57406369-57418960	protein_coding	5983	0.0983	0.0848	0.1355	0.0961
ENSG00000006282	SPATA20	chr17:48620418-48633213	protein_coding	5237	6.8012	7.606	6.9449	6.9698
ENSG00000006283	CACNA1G	chr17:48638428-48704835	protein_coding	9709	3.911	4.7211	2.1652	2.6741
ENSG00000006327	TNFRSF12A	chr16:3068445-3072384	protein_coding	1848	2.547	2.2424	3.1797	1.8144
ENSG00000006377	DLX6	chr7:96634859-96640351	protein_coding	3449	0	0	0	0.0278
ENSG00000006432	MAP3K9	chr14:71189242-71276251	protein_coding	12386	0.2375	0.2458	0.6748	0.611
ENSG00000006451	RALA	chr7:39663081-39747723	protein_coding	3665	13.6947	11.653	11.0156	11.1094
ENSG00000006453	BAIAP2L1	chr7:97920962-98030380	protein_coding	4798	0.981	1.2515	1.2141	0.8586
ENSG00000006459	KDM7A	chr7:139784545-139876835	protein_coding	9430	1.9581	1.9282	2.1487	1.9811
ENSG00000006468	ETV1	chr7:13930852-14031050	protein_coding	9686	1.0373	0.9604	1.4539	1.8496
ENSG00000006530	AGK	chr7:141250988-141355044	protein_coding	6547	6.7814	6.0583	6.6462	6.6141
ENSG00000006534	ALDH3B1	chr11:67776047-67796744	protein_coding	6621	0.0137	0	0.0153	0.0434
ENSG00000006555	TTC22	chr1:55245384-55266940	protein_coding	6055	0	0	0.0084	0
ENSG00000006576	PHTF2	chr7:77428121-77586818	protein_coding	8631	5.401	4.6151	5.5051	5.9384
ENSG00000006606	CCL26	chr7:75398850-75419214	protein_coding	706	0.1923	0.2396	0.2152	0.2714
ENSG00000006607	FARP2	chr2:242295657-242434256	protein_coding	14413	4.2454	5.3454	4.2667	4.8988
ENSG00000006611	USH1C	chr11:17515441-17565963	protein_coding	4187	0.4972	0.404	0.7259	0.7551
ENSG00000006625	GGCT	chr7:30536236-30591095	protein_coding	1905	13.8031	13.1406	14.8376	13.3771
ENSG00000006634	DBF4	chr7:87505530-87538856	protein_coding	4583	16.225	14.2274	16.8114	18.4581
ENSG00000006638	TBXA2R	chr19:3594503-3606838	protein_coding	2793	0	0	0	0
ENSG00000006652	IFRD1	chr7:112063022-112121072	protein_coding	6481	5.1955	5.6502	5.307	5.6172
ENSG00000006659	LGALS14	chr19:40194945-40200084	protein_coding	1079	0	0	0	0.0888
ENSG00000006695	COX10	chr17:13972812-14111994	protein_coding	3172	6.3778	5.1457	6.3399	6.4633
ENSG00000006704	GTF2IRD1	chr7:73868119-74016931	protein_coding	6498	8.8803	9.3447	9.5417	9.0229
ENSG00000006712	PAF1	chr19:39876491-39881835	protein_coding	2668	34.1132	27.9895	36.0928	35.118
ENSG00000006715	VPS41	chr7:38762562-38971994	protein_coding	7801	10.5182	10.1797	10.6038	9.0878
ENSG00000006740	ARHGAP44	chr17:12692855-12894960	protein_coding	9281	0.1853	0.2005	0.3056	0.2787
ENSG00000006744	ELAC2	chr17:12895707-12921504	protein_coding	6345	10.9775	12.1425	11.0412	13.1209
ENSG00000006747	SCIN	chr7:12610202-12693228	protein_coding	5048	0.0179	0.0168	0.0201	0.038
ENSG00000006756	ARSD	chrX:2822010-2847392	protein_coding	7030	2.5623	2.803	2.4787	2.4666
ENSG00000006757	PNPLA4	chrX:7866287-7895780	protein_coding	3441	0.0263	0	0.0147	0
ENSG00000006788	MYH13	chr17:10201400-10276447	protein_coding	6347	13.7478	12.5117	2.6736	2.9132
ENSG00000006831	ADIPOR2	chr12:1797739-1897844	protein_coding	5878	9.5937	11.2368	9.4709	10.0236
ENSG00000006837	CDKL3	chr5:133541304-133706738	protein_coding	3681	0.5902	0.3906	0.4679	0.4424
ENSG00000007001	UPP2	chr2:158733213-158992666	protein_coding	2957	0.0306	0	0.0343	0
ENSG00000007038	PRSS21	chr16:2867163-2876305	protein_coding	1984	0	0	0	0
ENSG00000007047	MARK4	chr19:45582545-45808541	protein_coding	6668	2.9932	3.7415	2.3246	2.9884
ENSG00000007062	PROM1	chr4:15964698-16086001	protein_coding	7465	5.4443	5.8344	4.6482	5.2233
ENSG00000007080	CCDC124	chr19:18043824-18054800	protein_coding	1660	16.222	15.131	16.9969	17.9485
ENSG00000007129	CEACAM21	chr19:42055885-42093197	protein_coding	1926	0	0	0	0
ENSG00000007168	PAFAH1B1	chr17:2496503-2588909	protein_coding	8127	18.4496	21.6864	17.7265	17.4111
ENSG00000007171	NOS2	chr17:26083791-26127525	protein_coding	4176	0.0108	0.0608	0.0485	0.1147
ENSG00000007174	DNAH9	chr17:11501747-11873065	protein_coding	16980	0.0746	0.0548	0.0656	0.1185
ENSG00000007202	KIAA0100	chr17:26941457-26972472	protein_coding	9235	30.257	31.548	30.4918	28.9534
ENSG00000007216	SLC13A2	chr17:26800310-26824799	protein_coding	3226	0	0	0.0314	0.0297
ENSG00000007237	GAS7	chr17:9813925-10101868	protein_coding	10100	2.2226	2.9809	2.5829	1.0529
ENSG00000007255	TRAPPC6A	chr19:45666185-45681495	protein_coding	933	5.3844	9.155	4.8864	7.0851
ENSG00000007264	MATK	chr19:3777970-3802127	protein_coding	4138	0.1094	0.1226	0.2203	0
ENSG00000007306	CEACAM7	chr19:42177234-42210895	protein_coding	2649	0.0513	0	0	0
ENSG00000007312	CD79B	chr17:62006099-62009714	protein_coding	2080	0	0	0	0
ENSG00000007314	SCN4A	chr17:62015913-62050278	protein_coding	8247	0.0823	0.1025	0.1167	0.1278
ENSG00000007341	ST7L	chr1:113066139-113163447	protein_coding	8111	3.4093	3.3678	3.1851	3.9804
ENSG00000007350	TKTL1	chrX:153524023-153558700	protein_coding	3650	0.0372	0.0463	0.0833	0.0525
ENSG00000007372	PAX6	chr11:31806339-31839509	protein_coding	14776	0.1011	0.0343	0.096	0.0908
ENSG00000007376	RPUSD1	chr16:834973-838397	protein_coding	2769	3.2362	4.7951	4.7381	5.0859
ENSG00000007384	RHBDF1	chr16:108057-126354	protein_coding	5104	1.6316	1.4084	1.5185	1.4453
ENSG00000007392	LUC7L	chr16:238967-279462	protein_coding	6176	16.6713	15.2682	15.8133	16.6289
ENSG00000007402	CACNA2D2	chr3:50400232-50541675	protein_coding	6319	1.7261	1.4454	0.7696	1.2584
ENSG00000007516	BAIAP3	chr16:1383601-1399439	protein_coding	6143	0.1105	0.1377	0.0825	0.156
ENSG00000007520	TSR3	chr16:1399240-1401912	protein_coding	1243	20.9723	18.8464	19.9279	26.0508
ENSG00000007541	PIGQ	chr16:616994-634136	protein_coding	6869	2.8134	3.5705	3.7757	2.9289
ENSG00000007545	CRAMP1L	chr16:1662325-1727909	protein_coding	8427	1.971	2.3082	1.4907	2.0463
ENSG00000007866	TEAD3	chr6:35441373-35464853	protein_coding	3046	22.1833	23.0723	23.5315	25.0986
ENSG00000007908	SELE	chr1:169691780-169733846	protein_coding	4586	0	0	0	0
ENSG00000007923	DNAJC11	chr1:6694227-6761984	protein_coding	5147	15.9155	14.9194	14.7133	16.1377
ENSG00000007933	FMO3	chr1:171060017-171086959	protein_coding	3463	0.0131	0.0244	0	0
ENSG00000007944	MYLIP	chr6:16129355-16148479	protein_coding	3033	6.9984	9.6198	6.4133	5.275
ENSG00000007952	NOX1	chrX:100098312-100129334	protein_coding	2529	0	0	0	0
ENSG00000007968	E2F2	chr1:23832921-23857712	protein_coding	5457	7.8043	8.6787	5.421	5.6705
ENSG00000008018	PSMB1	chr6:170844204-170862429	protein_coding	2256	36.2706	40.5609	37.5423	41.3615
ENSG00000008056	SYN1	chrX:47431302-47479252	protein_coding	3203	0.2685	0.4489	0.1898	0.2393
ENSG00000008083	JARID2	chr6:15246526-15522252	protein_coding	6490	12.2524	11.8842	12.1213	11.7207
ENSG00000008086	CDKL5	chrX:18443702-18671749	protein_coding	3576	2.9109	2.7906	3.5555	2.4647
ENSG00000008118	CAMK1G	chr1:209757061-209787283	protein_coding	2676	0.1691	0.1896	0.1514	0.179
ENSG00000008128	CDK11A	chr1:1634168-1655766	protein_coding	4707	2.6249	2.3537	2.0232	1.9336
ENSG00000008130	NADK	chr1:1682670-1711896	protein_coding	5637	6.3106	8.4616	6.6678	7.7159
ENSG00000008196	TFAP2B	chr6:50786435-50815326	protein_coding	6149	0.0368	0.0275	0.0989	0.0935
ENSG00000008197	TFAP2D	chr6:50681540-50740701	protein_coding	1856	0	0	0	0
ENSG00000008226	DLEC1	chr3:38080695-38165516	protein_coding	8338	0.0163	0.0406	0.0243	0.0345
ENSG00000008256	CYTH3	chr7:6201406-6312275	protein_coding	5805	8.8099	8.3478	8.22	7.8226
ENSG00000008277	ADAM22	chr7:87563457-87832204	protein_coding	12217	0.7891	0.7199	0.6634	0.4783
ENSG00000008282	SYPL1	chr7:105730948-105753022	protein_coding	2794	10.7881	10.5032	12.0927	9.6351
ENSG00000008283	CYB561	chr17:61509664-61523739	protein_coding	5320	0.3488	0.4451	0.7141	0.3422
ENSG00000008294	SPAG9	chr17:49039534-49198226	protein_coding	11948	19.754	21.6523	19.108	16.3653
ENSG00000008300	CELSR3	chr3:48673901-48700348	protein_coding	13888	1.2937	1.7659	1.003	1.0554
ENSG00000008311	AASS	chr7:121715700-121784334	protein_coding	4591	20.9187	18.7525	16.5393	18.572
ENSG00000008323	PLEKHG6	chr12:6419601-6437672	protein_coding	4260	0.085	0	0.0951	0.09
ENSG00000008324	SS18L2	chr3:42623331-42636606	protein_coding	1301	3.9309	4.6153	3.1148	3.6819
ENSG00000008382	MPND	chr19:4343523-4360083	protein_coding	2049	4.1746	5.4895	4.0544	4.3015
ENSG00000008394	MGST1	chr12:16500075-16762193	protein_coding	6213	0.2185	0.2722	0.7419	0.663
ENSG00000008405	CRY1	chr12:107385141-107487607	protein_coding	5062	6.947	8.3368	7.7454	8.157
ENSG00000008438	PGLYRP1	chr19:46522410-46526323	protein_coding	720	0	0	0	0
ENSG00000008441	NFIX	chr19:13106421-13209610	protein_coding	6302	2.6859	2.7913	2.7249	2.4019
ENSG00000008513	ST3GAL1	chr8:134467090-134584183	protein_coding	8730	3.1001	2.7803	2.2978	2.4801
ENSG00000008516	MMP25	chr16:3096681-3110727	protein_coding	4126	0.0219	0	0	0.0232
ENSG00000008517	IL32	chr16:3115297-3131908	protein_coding	2924	0.0155	0.1735	0.1386	0.2293
ENSG00000008710	PKD1	chr16:2138710-2185899	protein_coding	18532	3.3506	4.3673	3.1407	2.8484
ENSG00000008735	MAPK8IP2	chr22:51039113-51052409	protein_coding	6107	0.163	0.2077	0.1244	0.0941
ENSG00000008838	MED24	chr17:38175349-38217468	protein_coding	6962	8.1194	10.2282	8.753	9.7701
ENSG00000008853	RHOBTB2	chr8:22844929-22877712	protein_coding	6580	3.9068	4.3442	4.7191	3.5526
ENSG00000008869	HEATR5B	chr2:37195525-37311485	protein_coding	8206	6.4253	7.276	6.1112	6.7947
ENSG00000008952	SEC62	chr3:169684422-169716161	protein_coding	7928	15.0651	13.0355	14.127	14.525
ENSG00000008988	RPS20	chr8:56979853-56987069	protein_coding	2931	420.833	325.068	419.465	451.065
ENSG00000009307	CSDE1	chr1:115259533-115301297	protein_coding	5755	188.637	179.193	176.188	186.577
ENSG00000009335	UBE3C	chr7:156931606-157062066	protein_coding	9218	9.4218	9.9727	8.8803	9.3952
ENSG00000009413	REV3L	chr6:111620233-111804918	protein_coding	12417	9.6443	9.9779	10.007	10.4467
ENSG00000009694	TENM1	chrX:123509752-124097666	protein_coding	12896	0.0211	0.0525	0.0236	0.0446
ENSG00000009709	PAX7	chr1:18957499-19075360	protein_coding	6313	60.7646	60.4172	48.9059	44.8737
ENSG00000009724	MASP2	chr1:11086579-11107290	protein_coding	4251	0.0532	0	0.0119	0.0676
ENSG00000009765	IYD	chr6:150690027-150727105	protein_coding	10362	0.0131	0	0.0244	0.0092
ENSG00000009780	FAM76A	chr1:28052489-28089633	protein_coding	4034	3.5453	2.6625	3.516	3.5861
ENSG00000009790	TRAF3IP3	chr1:209929376-209955668	protein_coding	7753	0	0	0	0.0124
ENSG00000009830	POMT2	chr14:77741298-77787227	protein_coding	10012	2.9247	3.2436	3.2026	2.7845
ENSG00000009844	VTA1	chr6:142468366-142545826	protein_coding	7194	10.3174	10.2745	10.2381	10.3872
ENSG00000009950	MLXIPL	chr7:73007523-73038873	protein_coding	4815	0.0282	0.0176	0	0
ENSG00000009954	BAZ1B	chr7:72854727-72936608	protein_coding	7053	53.2534	49.3659	50.0231	49.8232
ENSG00000010017	RANBP9	chr6:13621729-13711796	protein_coding	3480	21.3025	19.3929	21.4557	17.6188
ENSG00000010030	ETV7	chr6:36322418-36356164	protein_coding	2369	0.0764	0	0	0
ENSG00000010072	SPRTN	chr1:231472849-231490769	protein_coding	5906	3.9925	3.6801	3.4479	3.52
ENSG00000010165	METTL13	chr1:171750787-171783163	protein_coding	3843	6.0297	6.6239	5.6284	6.4816
ENSG00000010219	DYRK4	chr12:4671369-4723325	protein_coding	5911	2.0826	1.7884	2.588	2.269
ENSG00000010244	ZNF207	chr17:30677135-30708905	protein_coding	15834	22.326	23.0842	22.1732	26.9183
ENSG00000010256	UQCRC1	chr3:48636434-48648409	protein_coding	3236	27.6219	34.1837	36.6765	30.8782
ENSG00000010270	STARD3NL	chr7:38217823-38270272	protein_coding	4348	8.9933	8.6555	9.2503	10.0914
ENSG00000010278	CD9	chr12:6308880-6347425	protein_coding	3218	13.7265	9.7238	8.878	8.7824
ENSG00000010282	HHATL	chr3:42734154-42744319	protein_coding	2891	0.0313	0.0585	0	0.0663
ENSG00000010292	NCAPD2	chr12:6602521-6641121	protein_coding	6487	29.2674	32.6706	32.1875	30.4376
ENSG00000010295	IFFO1	chr12:6647540-6665239	protein_coding	5193	3.643	4.3319	2.9361	3.3023
ENSG00000010310	GIPR	chr19:46171501-46186982	protein_coding	4736	0.0382	0.1071	0.0214	0.0809
ENSG00000010318	PHF7	chr3:52444672-52457657	protein_coding	3367	1.1291	0.854	0.6469	1.0812
ENSG00000010319	SEMA3G	chr3:52467068-52479101	protein_coding	5011	3.5495	3.6792	1.4152	1.2045
ENSG00000010322	NISCH	chr3:52489133-52527087	protein_coding	9161	10.7847	13.9951	10.7216	11.5766
ENSG00000010327	STAB1	chr3:52529353-52558511	protein_coding	10588	0.0043	0	0.0144	0
ENSG00000010361	FUZ	chr19:50310125-50320633	protein_coding	2951	4.3709	5.5024	5.3728	4.1879
ENSG00000010379	SLC6A13	chr12:329788-372039	protein_coding	4241	0.0854	0.0798	0.0956	0.0226
ENSG00000010404	IDS	chrX:148558520-148615470	protein_coding	10496	3.8851	3.4083	5.024	2.866
ENSG00000010438	PRSS3	chr9:33750514-33799230	protein_coding	1614	0	0	0	0
ENSG00000010539	ZNF200	chr16:3272324-3286221	protein_coding	7498	1.4668	1.6806	1.5471	1.1499
ENSG00000010610	CD4	chr12:6896023-6929974	protein_coding	4583	0.0198	0.0923	0.0774	0.0418
ENSG00000010626	LRRC23	chr12:6982732-7023407	protein_coding	3054	1.9413	2.52	1.9406	1.9449
ENSG00000010671	BTK	chrX:100604434-100641183	protein_coding	4227	0	0.06	0.036	0.0453
ENSG00000010704	HFE	chr6:26087508-26098571	protein_coding	5675	0.3349	0.2235	0.2678	0.1688
ENSG00000010803	SCMH1	chr1:41492871-41707826	protein_coding	4447	10.4622	9.2995	12.4047	11.7195
ENSG00000010810	FYN	chr6:111981534-112194655	protein_coding	7411	22.9496	25.2537	22.3235	23.6436
ENSG00000010818	HIVEP2	chr6:143072603-143266338	protein_coding	9774	2.005	2.3449	2.4462	3.1954
ENSG00000010932	FMO1	chr1:171217637-171255117	protein_coding	3574	0.6458	1.0175	0.1417	0.134
ENSG00000011007	TCEB3	chr1:24069644-24088549	protein_coding	5391	13.7932	12.9578	12.4218	15.4073
ENSG00000011009	LYPLA2	chr1:24117459-24122029	protein_coding	2196	11.5412	12.6317	14.0247	13.3931
ENSG00000011021	CLCN6	chr1:11866206-11903201	protein_coding	6884	4.2142	4.7175	4.3267	5.177
ENSG00000011028	MRC2	chr17:60704761-60770958	protein_coding	6860	8.029	10.6761	9.4591	6.2704
ENSG00000011052	NME2	chr17:49230950-49249105	protein_coding	1241	0	0	0	0
ENSG00000011083	SLC6A7	chr5:149569519-149602351	protein_coding	4391	0.0412	0	0	0
ENSG00000011105	TSPAN9	chr12:3186520-3395730	protein_coding	5714	29.6545	33.183	25.1148	32.8786
ENSG00000011114	BTBD7	chr14:93703895-93799438	protein_coding	11333	8.0788	8.022	7.6477	7.9885
ENSG00000011132	APBA3	chr19:3750816-3761697	protein_coding	5556	1.2545	1.5526	1.8417	1.3622
ENSG00000011143	MKS1	chr17:56282802-56296966	protein_coding	4073	3.9224	3.779	4.129	3.34
ENSG00000011198	ABHD5	chr3:43731604-43775863	protein_coding	3172	1.5552	2.1596	1.7566	2.0236
ENSG00000011201	KAL1	chrX:8496914-8700227	protein_coding	7131	2.1198	2.3245	1.6338	0.6717
ENSG00000011243	AKAP8L	chr19:15490858-15529952	protein_coding	5081	20.7184	21.771	18.0748	20.3069
ENSG00000011258	MBTD1	chr17:49254785-49337524	protein_coding	7201	6.3604	6.9526	5.7331	6.0001
ENSG00000011260	UTP18	chr17:49337888-49375297	protein_coding	2721	11.8426	12.7431	10.8347	14.1186
ENSG00000011275	RNF216	chr7:5659677-5821370	protein_coding	7619	10.9002	12.0546	10.6111	10.6126
ENSG00000011295	TTC19	chr17:15902693-15948329	protein_coding	5966	6.9943	7.8532	7.7944	9.3137
ENSG00000011304	PTBP1	chr19:797074-812327	protein_coding	6969	22.0153	25.1321	25.8255	24.5383
ENSG00000011332	DPF1	chr19:38701645-38720354	protein_coding	4800	1.3483	1.5152	1.4774	1.3572
ENSG00000011347	SYT7	chr11:61282784-61348620	protein_coding	5953	0.4409	0.4262	0.7318	0.6437
ENSG00000011376	LARS2	chr3:45429997-45590913	protein_coding	5393	8.0563	9.7226	8.8386	9.5927
ENSG00000011405	PIK3C2A	chr11:17099276-17229530	protein_coding	9204	18.7592	18.6618	20.556	21.848
ENSG00000011422	PLAUR	chr19:44150246-44174699	protein_coding	4457	3.0666	2.8272	3.4096	2.5149
ENSG00000011426	ANLN	chr7:36429414-36493400	protein_coding	6012	47.3809	42.5807	52.0707	52.1878
ENSG00000011451	WIZ	chr19:15532318-15560762	protein_coding	8155	6.7707	6.9378	6.0066	5.7329
ENSG00000011454	RABGAP1	chr9:125703111-125867145	protein_coding	8181	14.8869	16.0127	14.8851	15.5045
ENSG00000011465	DCN	chr12:91539024-91576900	protein_coding	8083	123.551	131.046	126.428	104.834
ENSG00000011478	QPCTL	chr19:46195740-46207247	protein_coding	2396	1.6811	2.1178	2.833	1.2795
ENSG00000011485	PPP5C	chr19:46850250-46896238	protein_coding	7059	10.3416	11.2977	11.5103	8.7537
ENSG00000011523	CEP68	chr2:65283499-65314138	protein_coding	8623	8.2244	9.0033	7.2608	6.555
ENSG00000011566	MAP4K3	chr2:39476406-39664453	protein_coding	6067	11.2567	10.9146	10.612	10.8009
ENSG00000011590	ZBTB32	chr19:36195428-36207940	protein_coding	2770	0	0	0	0
ENSG00000011600	TYROBP	chr19:36395302-36399197	protein_coding	907	0	0	0	0
ENSG00000011638	TMEM159	chr16:21169697-21191937	protein_coding	2558	0.8846	0.8927	0.9307	0.5243
ENSG00000011677	GABRA3	chrX:151334705-151619830	protein_coding	4193	0.0108	0.0202	0.0362	0.0457
ENSG00000012048	BRCA1	chr17:41196311-41277500	protein_coding	8278	9.7809	9.2356	10.0172	7.7309
ENSG00000012061	ERCC1	chr19:45910590-45982086	protein_coding	5576	12.5563	13.6199	13.3633	11.2709
ENSG00000012124	CD22	chr19:35810163-35838258	protein_coding	5839	0.0078	0	0	0
ENSG00000012171	SEMA3B	chr3:50304989-50314977	processed_transcript	5767	7.7065	9.7666	7.3607	6.3957
ENSG00000012174	MBTPS2	chrX:21857753-21903542	protein_coding	8927	1.7694	2.3021	1.6285	1.5883
ENSG00000012211	PRICKLE3	chrX:49031150-49042845	protein_coding	3396	0.8396	0.9961	1.4469	1.072
ENSG00000012223	LTF	chr3:46477135-46526724	protein_coding	4247	0	0	0	0
ENSG00000012232	EXTL3	chr8:28457985-28613116	protein_coding	13220	5.6795	7.0305	6.0043	6.2757
ENSG00000012504	NR1H4	chr12:100867485-100958191	protein_coding	3460	0	0	0	0
ENSG00000012660	ELOVL5	chr6:53132195-53213947	protein_coding	4223	43.9291	38.3702	44.1179	47.731
ENSG00000012779	ALOX5	chr10:45869660-45941561	protein_coding	3685	0	0	0.0137	0
ENSG00000012817	KDM5D	chrY:21865750-21906825	protein_coding	9463	0	0	0	0
ENSG00000012822	CALCOCO1	chr12:54104902-54121529	protein_coding	6296	11.027	10.1281	9.357	9.845
ENSG00000012963	UBR7	chr14:93673400-93695561	protein_coding	3694	14.7756	14.1714	15.9343	14.0825
ENSG00000012983	MAP4K5	chr14:50885218-51027844	protein_coding	7620	14.8781	13.5846	14.7977	15.2379
ENSG00000013016	EHD3	chr2:31456879-31492313	protein_coding	4959	2.163	2.2682	2.6558	1.4876
ENSG00000013275	PSMC4	chr19:40476911-40487348	protein_coding	2387	34.9247	35.4297	39.1108	40.6568
ENSG00000013288	MAN2B2	chr4:6576901-6625089	protein_coding	8898	2.0701	2.2431	1.9754	2.1964
ENSG00000013293	SLC7A14	chr3:170177371-170303863	protein_coding	10459	0.0043	0.0323	0.0048	0
ENSG00000013297	CLDN11	chr3:170136652-170578169	protein_coding	6032	0.0675	0.0981	0.0504	0.0953
ENSG00000013306	SLC25A39	chr17:42396992-42402238	protein_coding	3526	16.7632	19.1639	18.7191	17.6335
ENSG00000013364	MVP	chr16:29831714-29859355	protein_coding	6136	2.3455	2.9495	2.3776	1.6706
ENSG00000013374	NUB1	chr7:151038784-151075535	protein_coding	5411	11.6428	10.6905	11.7674	10.3221
ENSG00000013375	PGM3	chr6:83870868-83903655	protein_coding	7331	12.1248	13.2203	11.0003	8.7426
ENSG00000013392	RWDD2A	chr6:83903097-83908651	protein_coding	4686	2.685	2.9057	2.1944	2.1467
ENSG00000013441	CLK1	chr2:201717731-201729422	protein_coding	5125	16.9552	17.2277	14.9939	18.1884
ENSG00000013503	POLR3B	chr12:106751435-106903976	protein_coding	4858	6.1673	6.1452	5.4638	6.4289
ENSG00000013523	ANGEL1	chr14:77253587-77292589	protein_coding	5347	3.1995	3.7801	4.0263	4.4434
ENSG00000013561	RNF14	chr5:141337892-141369856	protein_coding	4834	5.243	6.0882	5.1766	5.6284
ENSG00000013563	DNASE1L1	chrX:153629578-153640449	protein_coding	4130	1.4027	1.6996	1.9379	0.8583
ENSG00000013573	DDX11	chr12:31226778-31257725	protein_coding	8374	6.5558	7.7663	6.8173	6.2694
ENSG00000013583	HEBP1	chr12:13127797-13153207	protein_coding	3442	0.8021	1.3514	0.8389	0.3618
ENSG00000013588	GPRC5A	chr12:13043715-13070871	protein_coding	8440	0.0214	0.01	0.054	0.0454
ENSG00000013619	MAMLD1	chrX:149529688-149682448	protein_coding	5958	0.471	0.7097	0.3316	0.4181
ENSG00000013725	CD6	chr11:60739114-60787849	protein_coding	5995	0.0528	0.0564	0.0507	0.016
ENSG00000013810	TACC3	chr4:1723226-1746898	protein_coding	4682	13.2043	17.0695	16.088	16.8401
ENSG00000014123	UFL1	chr6:96969470-97003152	protein_coding	4539	14.0092	13.3591	12.0974	12.1784
ENSG00000014138	POLA2	chr11:65029232-65073060	protein_coding	5726	8.3387	9.0833	9.9789	8.1313
ENSG00000014164	ZC3H3	chr8:144519824-144623623	protein_coding	3731	2.5352	3.3094	2.6475	2.6704
ENSG00000014216	CAPN1	chr11:64948036-64979477	protein_coding	7553	5.6385	6.9645	6.4182	6.2786
ENSG00000014257	ACPP	chr3:132036210-132087142	protein_coding	4193	0.3562	0.2824	0.4228	0.1371
ENSG00000014641	MDH1	chr2:63815742-63834331	protein_coding	4993	11.3485	14.9053	11.9105	9.632
ENSG00000014824	SLC30A9	chr4:41992488-42092474	protein_coding	7225	14.5327	15.4861	14.3167	14.5461
ENSG00000014914	MTMR11	chr1:149900542-149908791	protein_coding	4591	1.0351	1.5474	1.5778	1.2103
ENSG00000014919	COX15	chr10:101471600-101491857	protein_coding	4177	9.7516	10.9535	10.1868	10.711
ENSG00000015133	CCDC88C	chr14:91737666-91884188	protein_coding	12426	2.6952	2.7564	2.6579	3.2844
ENSG00000015153	YAF2	chr12:42550905-42632151	protein_coding	10840	2.1752	2.5278	2.1262	2.4658
ENSG00000015171	ZMYND11	chr10:180404-300577	protein_coding	5300	29.2982	26.6318	27.8317	30.3314
ENSG00000015285	WAS	chrX:48534984-48549818	protein_coding	2381	0.076	0.1421	0.0213	0.2012
ENSG00000015413	DPEP1	chr16:89679715-89704839	protein_coding	2712	0	0	0.0187	0.0353
ENSG00000015475	BID	chr22:18216905-18257536	protein_coding	4418	4.1386	5.3216	3.5429	3.8382
ENSG00000015479	MATR3	chr5:138609440-138667360	protein_coding	14669	70.4556	69.4657	63.9466	66.1323
ENSG00000015520	NPC1L1	chr7:44552133-44580914	protein_coding	5252	0	0.0161	0.0289	0
ENSG00000015532	XYLT2	chr17:48423452-48440499	protein_coding	5472	7.9814	9.2886	9.1831	9.3316
ENSG00000015568	RGPD5	chr2:110550334-110615272	protein_coding	14175	0.1277	0.1134	0.1001	0.0406
ENSG00000015592	STMN4	chr8:27092839-27115937	protein_coding	3294	0.0275	0.154	0.2153	0.2618
ENSG00000015676	NUDCD3	chr7:44418719-44530479	protein_coding	10113	7.6705	8.6971	7.8189	7.7396
ENSG00000016082	ISL1	chr5:50678920-50690564	protein_coding	3216	0.1267	0.1841	0.4253	0.6256
ENSG00000016391	CHDH	chr3:53846361-53880417	protein_coding	7758	0.56	0.4142	0.5289	0.531
ENSG00000016402	IL20RA	chr6:137321107-137366298	protein_coding	4673	0.0484	0.0362	0.0867	0.0615
ENSG00000016490	CLCA1	chr1:86934050-86965972	protein_coding	3340	0	0	0	0
ENSG00000016602	CLCA4	chr1:87012760-87046437	protein_coding	3649	0	0	0.0139	0
ENSG00000016864	GLT8D1	chr3:52728504-52740048	protein_coding	3783	10.6715	10.0376	10.5917	10.1298
ENSG00000017260	ATP2C1	chr3:130569438-130735556	protein_coding	8533	7.3565	8.3748	7.1474	7.5672
ENSG00000017373	SRCIN1	chr17:36686250-36762183	protein_coding	11025	0.1806	0.2301	0.1011	0.1564
ENSG00000017427	IGF1	chr12:102789644-102874423	protein_coding	8087	1.858	1.8824	2.0483	0.8293
ENSG00000017483	SLC38A5	chrX:48316919-48328644	protein_coding	4016	5.1952	4.9908	6.1805	5.1527
ENSG00000017621	MAGIX	chrX:49019060-49024822	protein_coding	4948	0.1098	0.0855	0.0819	0.1355
ENSG00000017797	RALBP1	chr18:9475006-9538114	protein_coding	4979	18.7431	18.0895	20.8257	21.4733
ENSG00000018189	RUFY3	chr4:71569920-71673032	protein_coding	8070	10.8014	11.5066	8.6559	9.3309
ENSG00000018236	CNTN1	chr12:41086243-41466220	protein_coding	7492	0.1087	0.1016	0.2366	0.179
ENSG00000018280	SLC11A1	chr2:219246751-219261617	protein_coding	8676	0.0052	0	0.0058	0
ENSG00000018408	WWTR1	chr3:149235021-149454501	protein_coding	8413	11.5445	10.6354	9.2303	11.2963
ENSG00000018510	AGPS	chr2:178257371-178408564	protein_coding	8197	11.153	12.1744	11.5993	10.3551
ENSG00000018607	ZNF806	chr2:133066881-133076309	pseudogene	1774	0.051	0	0	0.054
ENSG00000018610	CXorf56	chrX:118672111-118699397	protein_coding	2606	7.2246	6.8799	7.503	6.5804
ENSG00000018625	ATP1A2	chr1:160085548-160113381	protein_coding	6298	5.2171	6.0427	4.5765	4.8373
ENSG00000018699	TTC27	chr2:32853098-33046118	protein_coding	3185	6.6075	7.3817	6.982	7.7304
ENSG00000018869	ZNF582	chr19:56887412-56904914	protein_coding	3152	0.0144	0	0	0
ENSG00000019102	VSIG2	chr11:124617367-124622134	protein_coding	1432	0.0316	0	0	0
ENSG00000019144	PHLDB1	chr11:118477154-118528741	protein_coding	21988	3.5115	3.7231	3.1562	1.9999
ENSG00000019169	MARCO	chr2:119699741-119752236	protein_coding	2079	0.1306	0.2034	0	0.1382
ENSG00000019186	CYP24A1	chr20:52769987-52790512	protein_coding	3972	0.1139	0.5536	0.1403	0.0965
ENSG00000019485	PRDM11	chr11:45115563-45247734	protein_coding	5527	1.13	1.3924	1.2281	1.612
ENSG00000019505	SYT13	chr11:45261851-45307870	protein_coding	5424	0.2336	0.2339	0.2148	0.1943
ENSG00000019549	SNAI2	chr8:49830248-49834299	protein_coding	2282	34.9252	24.0889	35.1834	33.7533
ENSG00000019582	CD74	chr5:149781199-149792492	protein_coding	3184	0	0	0.175	0.2407
ENSG00000019991	HGF	chr7:81328321-81399754	protein_coding	8897	0.2594	0.2091	0.1594	0.1077
ENSG00000019995	ZRANB1	chr10:126630691-126676758	protein_coding	5993	15.8513	15.1841	15.0453	17.2326
ENSG00000020129	NCDN	chr1:36023073-36032875	protein_coding	4917	3.5713	4.6095	3.9045	4.4034
ENSG00000020181	GPR124	chr8:37641708-37702414	protein_coding	7061	15.3125	17.1872	15.1442	11.207
ENSG00000020219	CCT8L1P	chr7:152142561-152144235	pseudogene	1674	0	0	0.0303	0
ENSG00000020256	ZFP64	chr20:50668201-50820847	protein_coding	6997	3.7451	3.5051	3.9311	4.5046
ENSG00000020426	MNAT1	chr14:61201459-61436671	protein_coding	3865	12.0493	11.5533	11.1271	12.9141
ENSG00000020577	SAMD4A	chr14:55033814-55260033	protein_coding	12170	3.1461	3.0507	2.0687	3.2354
ENSG00000020633	RUNX3	chr1:25226001-25291612	protein_coding	4605	0.0295	0	0.055	0.0624
ENSG00000020922	MRE11A	chr11:94152894-94227074	protein_coding	3538	17.0773	16.2783	14.0597	12.6184
ENSG00000021300	PLEKHB1	chr11:73357222-73373864	protein_coding	4933	0.211	0.2743	0.3183	0.0971
ENSG00000021355	SERPINB1	chr6:2832565-2842240	protein_coding	3226	1.1504	1.0224	1.4603	1.277
ENSG00000021461	CYP3A43	chr7:99425635-99463718	protein_coding	2630	0	0	0	0
ENSG00000021488	SLC7A9	chr19:33321414-33360672	protein_coding	2597	0.1917	0.1303	0.2146	0.2213
ENSG00000021574	SPAST	chr2:32288679-32382706	protein_coding	5213	10.8262	10.8857	11.301	10.9347
ENSG00000021645	NRXN3	chr14:78708733-80330762	protein_coding	11335	3.0425	2.9844	1.792	2.4511
ENSG00000021762	OSBPL5	chr11:3108345-3187969	protein_coding	7466	1.7579	1.7671	1.5401	1.2062
ENSG00000021776	AQR	chr15:35147731-35262040	protein_coding	9779	15.4393	15.4976	14.9028	16.0275
ENSG00000021826	CPS1	chr2:211342405-211543831	protein_coding	10444	2.5957	2.7046	2.0274	3.7059
ENSG00000021852	C8B	chr1:57394882-57431813	protein_coding	2729	0	0	0.0371	0
ENSG00000022267	FHL1	chrX:135229558-135293518	protein_coding	4945	12.8132	12.8267	16.8304	17.0294
ENSG00000022277	RTFDC1	chr20:55043646-55093943	protein_coding	3501	18.641	19.7356	19.2145	19.8665
ENSG00000022355	GABRA1	chr5:161274196-161326975	protein_coding	5494	0.0412	0	0	0.0872
ENSG00000022556	NLRP2	chr19:55464497-55512510	protein_coding	6313	1.907	2.3711	1.1635	1.7755
ENSG00000022567	SLC45A4	chr8:142217264-142318404	protein_coding	8608	0.9201	1.0021	0.9769	1.0462
ENSG00000022840	RNF10	chr12:120971282-121015397	protein_coding	5911	11.2552	11.3171	10.8063	11.0049
ENSG00000022976	ZNF839	chr14:102783713-102809044	protein_coding	5595	2.7664	2.9324	2.5984	2.4486
ENSG00000023041	ZDHHC6	chr10:114190057-114206672	protein_coding	2404	15.0233	14.7049	13.9913	15.0239
ENSG00000023171	GRAMD1B	chr11:123396343-123498482	protein_coding	9770	4.2618	4.3194	4.236	4.6283
ENSG00000023191	RNH1	chr11:494511-507300	protein_coding	7367	5.357	6.5319	5.7002	5.3708
ENSG00000023228	NDUFS1	chr2:206979540-207024327	protein_coding	12268	12.4655	14.0009	12.3293	11.4716
ENSG00000023287	RB1CC1	chr8:53535015-53658403	protein_coding	7615	18.6441	17.2362	16.5702	15.2353
ENSG00000023318	ERP44	chr9:102741460-102861322	protein_coding	4854	11.8506	10.5931	10.1749	11.171
ENSG00000023330	ALAS1	chr3:52232101-52248343	protein_coding	2536	16.829	16.0738	17.9171	18.6618
ENSG00000023445	BIRC3	chr11:102188214-102210134	protein_coding	7484	0.0484	0	0.0609	0.064
ENSG00000023516	AKAP11	chr13:42846288-42897396	protein_coding	9913	10.6879	10.4338	9.4637	9.1811
ENSG00000023572	GLRX2	chr1:193065597-193075244	protein_coding	1299	4.9822	5.3386	4.9914	8.2601
ENSG00000023608	SNAPC1	chr14:62229074-62263146	protein_coding	2656	5.0268	5.0628	4.9778	5.663
ENSG00000023697	DERA	chr12:16064105-16190220	protein_coding	2848	6.6743	7.008	6.2963	5.8195
ENSG00000023734	STRAP	chr12:16035324-16056412	protein_coding	2211	61.5517	51.6757	59.9339	71.4077
ENSG00000023839	ABCC2	chr10:101542488-101611949	protein_coding	6232	0.1525	0.2985	0.065	0.0922
ENSG00000023892	DEF6	chr6:35265594-35289548	protein_coding	2675	0.2369	0.1581	0.4166	0.2865
ENSG00000023902	PLEKHO1	chr1:150121372-150136916	protein_coding	6629	10.5072	11.7371	11.3858	11.5183
ENSG00000023909	GCLM	chr1:94350760-94374966	protein_coding	5374	1.6675	1.9357	1.395	1.551
ENSG00000024048	UBR2	chr6:42531799-42661242	protein_coding	8997	10.5989	10.8287	9.0759	9.5728
ENSG00000024422	EHD2	chr19:48216599-48246391	protein_coding	3923	7.7526	9.3776	4.868	4.2736
ENSG00000024526	DEPDC1	chr1:68939834-68962904	protein_coding	5904	13.2922	13.164	17.2711	17.249
ENSG00000024862	CCDC28A	chr6:139094656-139114456	protein_coding	1496	6.5043	6.9533	7.8556	6.0197
ENSG00000025039	RRAGD	chr6:90074354-90121989	protein_coding	5072	3.0606	4.2352	5.6228	6.6299
ENSG00000025156	HSF2	chr6:122720690-122754264	protein_coding	2702	20.9373	15.3679	19.8909	19.749
ENSG00000025293	PHF20	chr20:34359895-34538303	protein_coding	7812	10.4223	11.6052	9.1039	9.4061
ENSG00000025423	HSD17B6	chr12:57145944-57181574	protein_coding	2272	0.5578	0.9678	0.5797	0.4638
ENSG00000025434	NR1H3	chr11:47269850-47290396	protein_coding	4346	0.7081	1.1676	1.1656	1.0801
ENSG00000025708	TYMP	chr22:50964180-50968485	protein_coding	3320	0.0818	0.1528	0.0915	0.0577
ENSG00000025770	NCAPH2	chr22:50946644-50961901	protein_coding	3159	9.298	11.9936	12.9083	8.3702
ENSG00000025772	TOMM34	chr20:43570770-43589127	protein_coding	2062	18.5685	16.4466	24.566	27.6907
ENSG00000025796	SEC63	chr6:108188959-108279393	protein_coding	8587	18.7789	14.6548	14.9954	14.738
ENSG00000025800	KPNA6	chr1:32573638-32642169	protein_coding	7687	15.979	15.2045	16.5863	18.0089
ENSG00000026025	VIM	chr10:17270257-17279592	protein_coding	4965	394.998	391.784	370.104	397.199
ENSG00000026036	RTEL1-TNFRSF6B	chr20:62290652-62330037	protein_coding	8738	0.1502	0.3581	0.2493	0.1425
ENSG00000026103	FAS	chr10:90750413-90775542	protein_coding	3562	0.5209	0.7598	1.0666	0.5917
ENSG00000026297	RNASET2	chr6:167342991-167370679	protein_coding	7478	0.9623	1.0405	0.7316	1.0121
ENSG00000026508	CD44	chr11:35160416-35253949	protein_coding	10060	3.7115	3.5896	2.2911	1.6951
ENSG00000026559	KCNG1	chr20:49620192-49639666	protein_coding	6320	0.6159	0.6022	1.1622	0.7276
ENSG00000026652	AGPAT4	chr6:161551010-161695093	protein_coding	9419	5.0068	5.0371	5.2597	5.7772
ENSG00000026751	SLAMF7	chr1:160709036-160724611	protein_coding	4604	0.0098	0	0.022	0.0208
ENSG00000026950	BTN3A1	chr6:26402464-26415444	protein_coding	5547	2.872	3.3694	2.8583	2.297
ENSG00000027001	MIPEP	chr13:24304327-24463558	protein_coding	3407	4.4102	5.1879	5.2187	4.471
ENSG00000027075	PRKCH	chr14:61654276-62017694	protein_coding	8809	0.0976	0.2688	0.3795	0.2175
ENSG00000027644	INSRR	chr1:156809854-156828810	protein_coding	5101	0.0976	0.1824	0.1092	0.3568
ENSG00000027697	IFNGR1	chr6:137518620-137540586	protein_coding	2680	9.6933	10.6029	7.6739	6.2915
ENSG00000027847	B4GALT7	chr5:177027100-177037348	protein_coding	4927	2.4893	3.2613	2.7656	3.0722
ENSG00000027869	SH2D2A	chr1:156776034-156786654	protein_coding	2512	0.1802	0.1347	0.0403	0.0381
ENSG00000028116	VRK2	chr2:58134785-58387055	protein_coding	3557	4.8859	4.3748	4.2723	2.7741
ENSG00000028137	TNFRSF1B	chr1:12227059-12269285	protein_coding	3766	0.1442	0.0449	0.0538	0.0254
ENSG00000028203	VEZT	chr12:95611521-95696566	protein_coding	8757	17.4634	15.5003	16.3124	17.3619
ENSG00000028277	POU2F2	chr19:42590262-42700737	protein_coding	8899	0.1373	0.1901	0.1025	0.183
ENSG00000028310	BRD9	chr5:850405-892939	protein_coding	9577	4.6028	4.5213	4.4853	5.3618
ENSG00000028528	SNX1	chr15:64386321-64438289	protein_coding	9796	9.5358	10.1181	8.4132	8.8116
ENSG00000028839	TBPL1	chr6:134273307-134311570	protein_coding	5039	3.413	3.9944	3.5888	3.8975
ENSG00000029153	ARNTL2	chr12:27485786-27576241	protein_coding	5002	1.0948	1.1328	0.719	0.6703
ENSG00000029363	BCLAF1	chr6:136578000-136610989	protein_coding	9297	76.2674	66.0501	71.8718	72.1223
ENSG00000029364	SLC39A9	chr14:69864731-69929105	protein_coding	7136	13.807	14.4467	15.056	13.1433
ENSG00000029534	ANK1	chr8:41510738-41754280	protein_coding	10799	0.637	0.4855	0.4503	0.6831
ENSG00000029559	IBSP	chr4:88720732-88733074	protein_coding	1033	0	0	0	0
ENSG00000029639	TFB1M	chr6:155578642-155635627	protein_coding	2736	2.1339	2.6583	1.907	2.1009
ENSG00000029725	RABEP1	chr17:5185557-5289129	protein_coding	6555	23.2539	22.9005	20.973	24.9627
ENSG00000029993	HMGB3	chrX:150148981-150159248	protein_coding	3967	50.814	46.5171	52.8642	58.346
ENSG00000030066	NUP160	chr11:47799638-47870107	protein_coding	8471	11.9837	14.1267	11.4394	12.2368
ENSG00000030110	BAK1	chr6:33540328-33548019	protein_coding	2267	3.9528	4.6631	4.2678	5.536
ENSG00000030304	MUSK	chr9:113431050-113563859	protein_coding	4159	5.811	7.9711	5.1885	6.9105
ENSG00000030419	IKZF2	chr2:213864428-214017151	protein_coding	12220	0.4555	0.5121	0.4104	0.4861
ENSG00000030582	GRN	chr17:42422613-42430470	protein_coding	3520	8.9102	11.0518	9.1956	9.798
ENSG00000031003	FAM13B	chr5:137273648-137387650	protein_coding	6808	11.5472	10.8446	10.8781	10.5259
ENSG00000031081	ARHGAP31	chr3:119013219-119139561	protein_coding	9384	2.3777	2.0097	1.8839	1.6743
ENSG00000031544	NR2E3	chr15:72084976-72110600	processed_transcript	3595	0.0126	0	0.0705	0
ENSG00000031691	CENPQ	chr6:49431090-49460820	protein_coding	1733	5.2492	4.636	4.4137	3.3722
ENSG00000031698	SARS	chr1:109756539-109780791	protein_coding	3836	47.2047	45.2837	50.3779	38.7355
ENSG00000031823	RANBP3	chr19:5916149-5978153	protein_coding	7445	9.2644	9.5419	10.4372	11.1437
ENSG00000032219	ARID4A	chr14:58765102-58840605	protein_coding	7568	8.1151	6.9507	7.1552	6.2028
ENSG00000032389	TSSC1	chr2:3192695-3381653	protein_coding	5775	3.2523	3.8954	3.2893	3.5833
ENSG00000032444	PNPLA6	chr19:7598889-7626650	protein_coding	7055	1.886	2.3735	2.0032	1.8196
ENSG00000032742	IFT88	chr13:21140584-21265503	protein_coding	5480	6.0206	6.4817	5.6294	5.5943
ENSG00000033011	ALG1	chr16:5083702-5137380	protein_coding	5786	1.9946	2.1048	1.9348	1.7551
ENSG00000033030	ZCCHC8	chr12:122957416-122985518	protein_coding	7752	5.6573	5.3457	5.3256	6.1916
ENSG00000033050	ABCF2	chr7:150904922-150924316	protein_coding	4448	16.636	18.6329	17.4697	20.1168
ENSG00000033100	CHPF2	chr7:150929574-150935908	protein_coding	4200	5.4956	7.2691	5.4032	4.0374
ENSG00000033122	LRRC7	chr1:70034080-70617628	protein_coding	14652	0.071	0.0808	0.0933	0.1112
ENSG00000033170	FUT8	chr14:65877309-66210839	protein_coding	6889	3.2979	3.3882	3.4339	2.9621
ENSG00000033178	UBA6	chr4:68478369-68566897	protein_coding	11432	9.248	9.9351	9.4292	9.5283
ENSG00000033327	GAB2	chr11:77926342-78129394	protein_coding	6771	7.9474	8.1561	6.8004	9.8477
ENSG00000033627	ATP6V0A1	chr17:40610861-40674629	protein_coding	10968	2.0302	2.3518	1.8381	1.5024
ENSG00000033800	PIAS1	chr15:68346516-68483096	protein_coding	4524	17.1768	14.6372	18.8669	20.9435
ENSG00000033867	SLC4A7	chr3:27414213-27525911	protein_coding	9564	12.5827	12.919	11.4085	16.9487
ENSG00000034053	APBA2	chr15:29129628-29410518	protein_coding	6869	7.017	7.7688	7.1606	6.9735
ENSG00000034063	UHRF1	chr19:4903091-4962165	processed_transcript	5144	16.8926	18.6437	17.1936	20.8031
ENSG00000034152	MAP2K3	chr17:21187983-21218552	protein_coding	3783	1.5194	1.6319	1.58	1.3928
ENSG00000034239	EFCAB1	chr8:49623347-49647870	protein_coding	5805	0.078	0.0874	0.096	0.1815
ENSG00000034510	TMSB10	chr2:85132748-85133795	protein_coding	492	1997.24	2193.17	2251.68	1848.67
ENSG00000034533	ASTE1	chr3:130732718-130746493	protein_coding	3427	3.0375	3.4302	3.3406	2.9073
ENSG00000034677	RNF19A	chr8:101269287-101348446	protein_coding	6031	8.5248	7.7405	7.8616	5.6709
ENSG00000034693	PEX3	chr6:143771943-143811147	protein_coding	2222	6.3345	7.0412	6.8847	7.847
ENSG00000034713	GABARAPL2	chr16:75600248-75611779	protein_coding	3034	9.338	9.2821	8.6651	8.2098
ENSG00000034971	MYOC	chr1:171604556-171621823	protein_coding	2095	0	0	0	0
ENSG00000035115	SH3YL1	chr2:217729-266398	protein_coding	11165	1.816	2.4012	1.6288	2.0593
ENSG00000035141	FAM136A	chr2:70523106-70529222	protein_coding	3086	14.3723	14.223	14.9044	16.9812
ENSG00000035403	VCL	chr10:75757871-75879918	protein_coding	5818	44.169	48.0707	53.4152	48.988
ENSG00000035499	DEPDC1B	chr5:59892738-59996017	protein_coding	3806	3.9955	5.1551	5.377	5.5881
ENSG00000035664	DAPK2	chr15:64199234-64364232	protein_coding	7041	0.4114	0.6966	0.2662	0.5715
ENSG00000035681	NSMAF	chr8:59496062-59572403	protein_coding	6165	10.7988	10.453	10.1228	9.7279
ENSG00000035687	ADSS	chr1:244571795-244615436	protein_coding	3666	11.1232	12.5495	12.3529	12.021
ENSG00000035720	STAP1	chr4:68424445-68473055	protein_coding	1655	0.0273	0	0.1224	0
ENSG00000035862	TIMP2	chr17:76849058-76921469	protein_coding	5633	21.4439	20.5084	21.3933	19.3374
ENSG00000035928	RFC1	chr4:39289075-39367995	protein_coding	6713	26.0168	23.382	23.0148	22.0204
ENSG00000036054	TBC1D23	chr3:99979843-100044095	protein_coding	5168	8.3107	9.0822	8.5177	7.9156
ENSG00000036257	CUL3	chr2:225334866-225450110	protein_coding	11501	12.7695	12.6036	11.936	12.8364
ENSG00000036448	MYOM2	chr8:1993154-2113475	protein_coding	7062	0.2756	0.3712	0.2152	1.0853
ENSG00000036473	OTC	chrX:38211797-38280703	protein_coding	1585	0	0	0.032	0
ENSG00000036530	CYP46A1	chr14:100150640-100193638	protein_coding	9354	0.3097	0.1989	0.2058	0.2868
ENSG00000036549	ZZZ3	chr1:78028100-78149104	protein_coding	9008	14.8264	14.2985	13.8334	15.1659
ENSG00000036565	SLC18A1	chr8:20002365-20040717	protein_coding	3910	0	0	0.0518	0.0245
ENSG00000036672	USP2	chr11:119225924-119252436	protein_coding	4538	1.1569	1.0436	1.5069	1.6467
ENSG00000036828	CASR	chr3:121902529-122005342	protein_coding	5390	0	0	0	0.0178
ENSG00000037042	TUBG2	chr17:40811322-40819024	protein_coding	2772	3.6409	4.0577	3.8923	5.1496
ENSG00000037241	RPL26L1	chr5:172385731-172396774	protein_coding	1164	18.8964	18.8904	18.2341	22.2222
ENSG00000037280	FLT4	chr5:180028505-180076624	protein_coding	8849	0.3018	0.2485	0.2633	0.2382
ENSG00000037474	NSUN2	chr5:6599351-6633404	protein_coding	5506	10.7679	11.4123	10.442	13.4673
ENSG00000037637	FBXO42	chr1:16573333-16678949	protein_coding	8984	4.5641	5.6104	5.6497	4.9053
ENSG00000037749	MFAP3	chr5:153418465-153600038	protein_coding	7213	7.818	9.7198	8.1675	7.6637
ENSG00000037757	MRI1	chr19:13875345-13885096	protein_coding	3456	4.112	4.4537	6.2586	4.5462
ENSG00000037897	METTL1	chr12:58162253-58166576	protein_coding	2621	3.1427	2.904	2.6478	3.5821
ENSG00000037965	HOXC8	chr12:54402831-54407570	protein_coding	3371	6.6726	6.1465	4.1624	5.0871
ENSG00000038002	AGA	chr4:178351923-178363657	protein_coding	2675	1.5735	1.0749	1.6285	1.4684
ENSG00000038210	PI4K2B	chr4:25162262-25280714	protein_coding	7332	4.1357	3.4373	3.482	3.4103
ENSG00000038219	BOD1L1	chr4:13570361-13629347	protein_coding	15860	18.1917	16.4769	15.5415	15.6268
ENSG00000038274	MAT2B	chr5:162930119-162946342	protein_coding	5153	8.5545	9.2235	8.395	7.8456
ENSG00000038295	TLL1	chr4:166794409-167025047	protein_coding	7522	0.0361	0.0675	0.1953	0.242
ENSG00000038358	EDC4	chr16:67906925-67918406	protein_coding	6173	9.1279	11.0286	9.6748	9.6532
ENSG00000038382	TRIO	chr5:14143810-14532235	protein_coding	17500	18.1498	20.0022	16.2125	17.1842
ENSG00000038427	VCAN	chr5:82767283-82878122	protein_coding	14831	110.754	115.677	103.667	71.3011
ENSG00000038532	CLEC16A	chr16:11038344-11276046	protein_coding	11944	2.6638	2.811	2.6464	2.7993
ENSG00000038945	MSR1	chr8:15965386-16424999	protein_coding	7812	0.0348	0.0325	0.0713	0.0736
ENSG00000039068	CDH1	chr16:68771127-68869451	protein_coding	6154	0.0588	0.055	0.0494	0.1401
ENSG00000039123	SKIV2L2	chr5:54603587-54721409	protein_coding	6578	21.6176	21.2391	18.474	21.6713
ENSG00000039139	DNAH5	chr5:13690439-13944652	protein_coding	16475	0.0027	0.0051	0.043	0.0174
ENSG00000039319	ZFYVE16	chr5:79703831-79775169	protein_coding	11461	12.1072	12.5886	10.4042	11.2763
ENSG00000039523	FAM65A	chr16:67552320-67580691	protein_coding	6730	1.1903	1.5079	0.843	1.637
ENSG00000039537	C6	chr5:41142335-41261540	protein_coding	4739	0	0	0	0
ENSG00000039560	RAI14	chr5:34656341-34832732	protein_coding	7702	14.1086	12.287	16.4356	13.8442
ENSG00000039600	SOX30	chr5:157052686-157098488	protein_coding	3471	0	0.0244	0.0438	0.0552
ENSG00000039650	PNKP	chr19:50364460-50371166	protein_coding	3531	4.8065	6.1554	5.9966	6.1589
ENSG00000039987	BEST2	chr19:12862515-12869272	protein_coding	2646	0	0.1278	0.0191	0
ENSG00000040199	PHLPP2	chr16:71671737-71758604	protein_coding	12493	3.2532	3.4456	2.5991	3.9416
ENSG00000040275	SPDL1	chr5:169010637-169031782	protein_coding	4777	11.0184	12.3749	14.0291	12.3137
ENSG00000040341	STAU2	chr8:74332603-74659943	protein_coding	8998	9.3001	8.3744	9.3733	8.2302
ENSG00000040487	PQLC2	chr1:19638819-19655794	protein_coding	2686	4.2798	6.6435	4.4319	4.4584
ENSG00000040531	CTNS	chr17:3539761-3564836	protein_coding	3398	2.5972	2.5884	2.4299	2.03
ENSG00000040608	RTN4R	chr22:20228937-20270769	protein_coding	3339	0.8404	1.3677	1.3805	1.4633
ENSG00000040633	PHF23	chr17:7138346-7143041	protein_coding	2783	19.4823	18.0507	20.6953	21.5495
ENSG00000040731	CDH10	chr5:24487208-24645087	protein_coding	3660	0.2597	0.0924	0.1384	0.1047
ENSG00000040933	INPP4A	chr2:99061316-99210853	protein_coding	13202	4.1172	4.9966	4.0249	4.042
ENSG00000041353	RAB27B	chr18:52385090-52562747	protein_coding	7432	0.0548	0.0683	0.0682	0.1289
ENSG00000041357	PSMA4	chr15:78832746-78841604	protein_coding	3839	39.8233	37.4279	43.0021	45.4182
ENSG00000041515	MYO16	chr13:109248499-109860355	protein_coding	8994	0.5384	0.7804	0.3774	1.0758
ENSG00000041802	LSG1	chr3:194361516-194393206	protein_coding	4818	13.3012	14.569	12.7637	13.74
ENSG00000041880	PARP3	chr3:51976360-51982883	protein_coding	2928	2.2722	2.5129	3.1486	2.094
ENSG00000041982	TNC	chr9:117782805-117880536	protein_coding	8687	198.506	232.363	208.574	185.55
ENSG00000041988	THAP3	chr1:6684925-6695646	protein_coding	4072	3.1676	3.8215	3.4956	4.2819
ENSG00000042062	FAM65C	chr20:49202644-49308065	protein_coding	6009	0.0075	0	0.0084	0.0159
ENSG00000042088	TDP1	chr14:90421282-90511106	protein_coding	6221	9.7558	9.5704	10.3248	10.5797
ENSG00000042286	AIFM2	chr10:71857978-71892690	protein_coding	5131	0.4763	0.4945	0.5726	0.4855
ENSG00000042304	C2orf83	chr2:228474805-228498036	protein_coding	2087	0	0	0	0
ENSG00000042317	SPATA7	chr14:88851267-88936694	protein_coding	6872	3.4444	3.1382	3.1107	4.2659
ENSG00000042429	MED17	chr11:93517392-93547861	protein_coding	10773	6.3646	6.9946	5.4967	6.5095
ENSG00000042445	RETSAT	chr2:85569210-85581743	protein_coding	4264	3.5981	4.0659	3.5283	3.0331
ENSG00000042493	CAPG	chr2:85621870-85645555	protein_coding	2607	0.6076	0.9732	3.07	1.1759
ENSG00000042753	AP2S1	chr19:47341392-47354249	protein_coding	1704	16.5999	18.3137	19.5605	18.0473
ENSG00000042781	USH2A	chr1:215796235-216596738	protein_coding	20584	0.0044	0.0082	0.0172	0.014
ENSG00000042813	ZPBP	chr7:49890016-50160925	protein_coding	2643	0	0	0	0
ENSG00000042832	TG	chr8:133879202-134147147	protein_coding	11132	0.622	0.509	0.4641	0.6368
ENSG00000042980	ADAM28	chr8:24151552-24216531	protein_coding	9351	4.8738	5.2727	4.2903	3.0326
ENSG00000043039	BARX2	chr11:129245834-129322171	protein_coding	4411	15.452	14.6479	15.0553	20.5244
ENSG00000043093	DCUN1D1	chr3:182655861-182703741	protein_coding	8412	9.8726	8.6963	7.9066	8.348
ENSG00000043143	JADE2	chr5:133860002-133918918	protein_coding	9873	0.3025	0.3855	0.3591	0.1067
ENSG00000043355	ZIC2	chr13:100634025-100639018	protein_coding	3301	0.2331	0.1793	0.1841	0.4353
ENSG00000043462	LCP2	chr5:169673240-169725231	protein_coding	7231	0.0063	0	0	0.0132
ENSG00000043514	TRIT1	chr1:40306722-40349183	protein_coding	3054	10.2994	8.3352	11.1627	11.293
ENSG00000043591	ADRB1	chr10:115803805-115806667	protein_coding	2862	0	0	0	0
ENSG00000044012	GUCA2B	chr1:42619091-42621495	protein_coding	597	0	0	0	0
ENSG00000044090	CUL7	chr6:43005354-43021683	protein_coding	5628	13.0274	16.2439	14.2749	12.5285
ENSG00000044115	CTNNA1	chr5:137946655-138270723	protein_coding	8830	41.6753	47.0359	43.3294	41.1202
ENSG00000044446	PHKA2	chrX:18910417-19002716	protein_coding	9029	3.1128	3.3532	3.4671	4.1063
ENSG00000044459	CNTLN	chr9:17134979-17503921	protein_coding	11167	8.284	7.4369	7.276	6.4257
ENSG00000044524	EPHA3	chr3:89156673-89531284	protein_coding	6674	8.2596	8.8575	8.569	5.0815
ENSG00000044574	HSPA5	chr9:127997131-128003609	protein_coding	3908	53.1678	53.9712	47.3499	50.132
ENSG00000046604	DSG2	chr18:29078005-29128971	protein_coding	6190	0.446	0.4099	0.6301	0.4798
ENSG00000046647	GEMIN8	chrX:14026397-14048012	protein_coding	2424	7.8231	8.9316	5.7259	5.9679
ENSG00000046651	OFD1	chrX:13752831-13787480	protein_coding	5212	12.8688	11.91	9.301	10.9919
ENSG00000046653	GPM6B	chrX:13789149-13956757	protein_coding	5675	42.1318	44.5281	29.7594	28.0908
ENSG00000046774	MAGEC2	chrX:141290130-141293076	protein_coding	1991	0.0455	0	0	0
ENSG00000046889	PREX2	chr8:68864352-69149265	protein_coding	12058	1.6965	1.4518	2.8861	3.758
ENSG00000047056	WDR37	chr10:1095477-1178237	protein_coding	5656	4.473	4.8894	4.3974	4.3362
ENSG00000047188	YTHDC2	chr5:112849379-112930982	protein_coding	10816	6.0213	6.0207	5.4561	6.5102
ENSG00000047230	CTPS2	chrX:16606125-16731059	protein_coding	5510	23.0069	21.5187	22.1467	19.6299
ENSG00000047249	ATP6V1H	chr8:54628116-54756118	protein_coding	5090	3.1743	3.3562	3.4235	2.8797
ENSG00000047315	POLR2B	chr4:57843887-57897334	protein_coding	5901	33.2245	36.4166	33.1005	35.3435
ENSG00000047346	FAM214A	chr15:52873513-53002014	protein_coding	7755	1.5816	1.7994	1.3652	1.0377
ENSG00000047365	ARAP2	chr4:35949842-36246131	protein_coding	12428	0.0546	0.0068	0.0367	0.0154
ENSG00000047410	TPR	chr1:186280783-186344825	protein_coding	12350	51.5025	45.7024	48.1368	49.2199
ENSG00000047457	CP	chr3:148880196-148939842	protein_coding	7296	0.0434	0	0.0347	0.105
ENSG00000047578	KIAA0556	chr16:27561453-27791690	protein_coding	9692	3.1753	3.7259	3.3554	3.3707
ENSG00000047579	DTNBP1	chr6:15523031-15663289	protein_coding	3078	1.2498	0.9617	1.1849	1.6185
ENSG00000047597	XK	chrX:37545011-37591383	protein_coding	5206	0.0869	0.065	0.0292	0
ENSG00000047617	ANO2	chr12:5641034-6055398	protein_coding	6012	0.7754	0.6049	0.6488	0.7968
ENSG00000047621	C12orf4	chr12:4596893-4647674	protein_coding	4939	6.4602	5.5307	6.1742	5.8773
ENSG00000047634	SCML1	chrX:17755587-17773105	protein_coding	5475	4.1249	3.8771	3.8119	4.4795
ENSG00000047644	WWC3	chrX:9983601-10112518	protein_coding	7114	9.5555	9.8908	8.2028	8.6995
ENSG00000047648	ARHGAP6	chrX:11136238-11683821	protein_coding	8357	0.7744	0.8703	0.885	1.7425
ENSG00000047662	FAM184B	chr4:17630928-17783135	protein_coding	6622	0.0547	0.0639	0.0994	0.1157
ENSG00000047849	MAP4	chr3:47892181-48130769	protein_coding	14901	20.2007	20.3637	18.2856	18.7734
ENSG00000047932	GOPC	chr6:117639373-117923691	protein_coding	5025	22.4894	21.0711	21.6935	27.4538
ENSG00000047936	ROS1	chr6:117609462-117747018	protein_coding	7856	0	0	0.0193	0
ENSG00000048028	USP28	chr11:113668595-113746292	protein_coding	5719	11.9654	13.93	14.2692	10.3357
ENSG00000048052	HDAC9	chr7:18126571-19042039	protein_coding	16827	0.0861	0.1458	0.2198	0.148
ENSG00000048140	TSPAN17	chr5:176074387-176086058	protein_coding	5218	6.1321	6.3695	6.6887	5.0306
ENSG00000048162	NOP16	chr5:175810948-175815976	protein_coding	2852	6.4745	6.7313	6.3585	8.1291
ENSG00000048342	CC2D2A	chr4:15471488-15603180	protein_coding	7570	4.8486	5.2508	5.6878	5.4166
ENSG00000048392	RRM2B	chr8:103216729-103251346	protein_coding	5548	5.5145	5.0761	4.4647	4.7487
ENSG00000048405	ZNF800	chr7:126986843-127071978	protein_coding	5793	5.9922	6.5548	5.1416	5.5897
ENSG00000048462	TNFRSF17	chr16:12058963-12061925	protein_coding	1118	0	0	0	0
ENSG00000048471	SNX29	chr16:12070593-12668146	protein_coding	11298	2.72	2.9568	2.4704	2.5693
ENSG00000048540	LMO3	chr12:16701306-16763528	protein_coding	10268	0.5069	0.5765	1.1889	0.7184
ENSG00000048544	MRPS10	chr6:42174538-42185603	protein_coding	2110	28.8493	24.6898	29.5769	30.9655
ENSG00000048545	GUCA1A	chr6:42123143-42147794	protein_coding	2317	0	0	0.1968	0
ENSG00000048649	RSF1	chr11:77371040-77532063	protein_coding	15740	12.4934	11.654	10.971	10.6636
ENSG00000048707	VPS13D	chr1:12290123-12572099	protein_coding	20346	4.4956	5.5117	4.2051	4.445
ENSG00000048740	CELF2	chr10:11047258-11378674	protein_coding	9873	27.1374	28.7813	26.854	33.7293
ENSG00000048828	FAM120A	chr9:96214003-96328397	protein_coding	7296	19.5461	19.3692	20.0788	22.3355
ENSG00000048991	R3HDM1	chr2:136289024-136482840	protein_coding	7898	6.9222	6.4033	7.69	8.7336
ENSG00000049089	COL9A2	chr1:40766158-40783488	protein_coding	4151	1.5264	1.4058	2.3796	2.2849
ENSG00000049130	KITLG	chr12:88886569-88974628	protein_coding	6030	1.2834	1.3464	0.8821	0.8897
ENSG00000049167	ERCC8	chr5:60169657-60240900	protein_coding	4847	1.8955	1.9542	1.4422	1.4626
ENSG00000049192	ADAMTS6	chr5:64444562-64777747	protein_coding	8567	1.5584	1.5301	2.85	0.8499
ENSG00000049239	H6PD	chr1:9294833-9331396	protein_coding	9321	8.8661	10.8605	8.342	8.87
ENSG00000049245	VAMP3	chr1:7831328-7841492	protein_coding	2760	20.3333	23.8085	20.6475	22.0415
ENSG00000049246	PER3	chr1:7844379-7905237	protein_coding	8059	0.8761	0.8815	1.0371	1.4503
ENSG00000049247	UTS2	chr1:7903142-7913572	protein_coding	1783	0	0	0	0
ENSG00000049249	TNFRSF9	chr1:7979906-8000926	protein_coding	2284	0	0	0.0222	0
ENSG00000049283	EPN3	chr17:48609903-48621111	protein_coding	4642	0.0877	0	0.0327	0
ENSG00000049319	SRD5A2	chr2:31747549-31806136	processed_transcript	4647	0	0.0546	0	0
ENSG00000049323	LTBP1	chr2:33172038-33624576	protein_coding	7329	17.3091	19.0281	20.2372	30.7707
ENSG00000049449	RCN1	chr11:31833938-32127301	protein_coding	7225	71.6111	65.0346	62.6862	58.635
ENSG00000049540	ELN	chr7:73442118-73484237	protein_coding	6542	18.3329	18.1241	3.3837	5.7405
ENSG00000049541	RFC2	chr7:73645828-73668774	protein_coding	2197	15.9237	15.436	15.7015	15.0877
ENSG00000049618	ARID1B	chr6:157099062-157531913	protein_coding	16334	5.8574	6.4979	6.1249	6.4869
ENSG00000049656	CLPTM1L	chr5:1317858-1345214	protein_coding	6557	6.5778	8.5641	7.5554	8.518
ENSG00000049759	NEDD4L	chr18:55711598-56068772	protein_coding	15717	11.74	12.8548	13.2786	13.8794
ENSG00000049768	FOXP3	chrX:49106896-49121288	protein_coding	2578	0.0527	0.0328	0.1572	0.1486
ENSG00000049769	PPP1R3F	chrX:49126305-49157929	protein_coding	4162	1.3375	1.2598	1.1441	1.5422
ENSG00000049860	HEXB	chr5:73935847-74018472	protein_coding	5067	2.8314	3.6886	3.2091	1.8718
ENSG00000049883	PTCD2	chr5:71616193-71656052	protein_coding	3637	2.103	2.4183	1.8385	2.3707
ENSG00000050030	KIAA2022	chrX:73952683-74145282	protein_coding	11719	0.0386	0.0289	0.0648	0.049
ENSG00000050130	JKAMP	chr14:59951160-59972128	protein_coding	4350	10.7995	8.6515	10.5502	10.5273
ENSG00000050165	DKK3	chr11:11984652-12031316	protein_coding	5059	2.9432	3.6443	2.5933	2.4618
ENSG00000050327	ARHGEF5	chr7:144052380-144077725	protein_coding	5818	0.0311	0.0291	0.0261	0.0494
ENSG00000050344	NFE2L3	chr7:26191859-26226745	protein_coding	4249	0.7989	0.6568	1.4544	1.195
ENSG00000050393	MCUR1	chr6:13786788-13814800	protein_coding	6057	6.3587	6.4367	7.2173	6.817
ENSG00000050405	LIMA1	chr12:50569570-50677329	protein_coding	6317	24.0512	22.4513	18.1066	15.9696
ENSG00000050426	LETMD1	chr12:51441744-51454207	protein_coding	4400	5.6778	7.0347	6.1477	5.8352
ENSG00000050438	SLC4A8	chr12:51785100-51902980	protein_coding	11415	0.1586	0.1185	0.2485	0.1511
ENSG00000050555	LAMC3	chr9:133884468-133969860	protein_coding	7594	0.6973	0.6571	0.2268	0.2902
ENSG00000050628	PTGER3	chr1:71318035-71513491	protein_coding	9882	0.0092	0	0.0359	0.0776
ENSG00000050730	TNIP3	chr4:122052562-122148621	protein_coding	3768	0	0	0.0269	0.0254
ENSG00000050748	MAPK9	chr5:179660142-179719099	protein_coding	8955	5.2308	5.7986	6.0922	6.0766
ENSG00000050767	COL23A1	chr5:177664618-178017556	protein_coding	3878	5.5551	5.6482	3.5921	4.4714
ENSG00000050820	BCAR1	chr16:75262927-75301951	protein_coding	8335	3.2091	3.4498	3.3122	2.5861
ENSG00000051009	FAM160A2	chr11:6232564-6255941	protein_coding	4736	3.7365	4.5714	4.4815	3.3984
ENSG00000051108	HERPUD1	chr16:56965959-56977798	protein_coding	4178	14.4938	15.06	14.7674	12.4282
ENSG00000051128	HOMER3	chr19:19040009-19052070	protein_coding	3422	6.9038	6.8952	7.9491	9.0987
ENSG00000051180	RAD51	chr15:40986971-41024354	protein_coding	2863	6.3074	5.8783	6.4403	4.7851
ENSG00000051341	POLQ	chr3:121150277-121264853	protein_coding	9099	10.9178	10.2425	9.5587	9.4023
ENSG00000051382	PIK3CB	chr3:138372859-138553780	protein_coding	6531	0.5613	0.764	0.4111	0.6454
ENSG00000051523	CYBA	chr16:88709690-88717560	protein_coding	3357	0.8763	1.2596	1.0713	1.1415
ENSG00000051596	THOC3	chr5:175344875-175461683	protein_coding	3437	4.5561	4.2322	5.0994	5.0452
ENSG00000051620	HEBP2	chr6:138724667-138743334	protein_coding	10356	2.8887	2.8909	2.6609	2.7105
ENSG00000051825	MPHOSPH9	chr12:123636866-123728561	protein_coding	10304	11.0641	11.2115	11.0513	10.8131
ENSG00000052126	PLEKHA5	chr12:19282647-19529334	protein_coding	12596	3.8482	3.639	4.1261	3.6204
ENSG00000052344	PRSS8	chr16:31142755-31147083	protein_coding	3008	0	0.0562	0.1179	0.0318
ENSG00000052723	SIKE1	chr1:115312099-115323306	protein_coding	5894	16.3479	14.9656	15.1175	15.344
ENSG00000052749	RRP12	chr10:99116114-99161127	protein_coding	6801	3.9994	4.5885	3.6794	5.9727
ENSG00000052795	FNIP2	chr4:159690289-159829201	protein_coding	10868	3.9145	3.883	3.9525	4.3635
ENSG00000052802	MSMO1	chr4:166248774-166264312	protein_coding	2892	23.4741	26.4064	24.7846	31.9673
ENSG00000052841	TTC17	chr11:43380481-43516483	protein_coding	11284	19.5006	19.0441	16.1698	17.9056
ENSG00000052850	ALX4	chr11:44281993-44331716	protein_coding	5750	0.0945	0.0588	0.0705	0.6498
ENSG00000053108	FSTL4	chr5:132532146-132948255	protein_coding	6733	0.1748	0.1884	0.1655	0.3415
ENSG00000053254	FOXN3	chr14:89591214-90085493	protein_coding	11033	14.2383	14.3953	11.8775	12.4518
ENSG00000053328	METTL24	chr6:110567130-110679475	protein_coding	1774	0.9439	0.9534	2.0273	0.7561
ENSG00000053371	AKR7A2	chr1:19630458-19638640	protein_coding	1781	23.709	23.9324	23.9197	22.5386
ENSG00000053372	MRTO4	chr1:19578032-19586622	protein_coding	2822	16.3744	20.2286	17.7885	21.1499
ENSG00000053438	NNAT	chr20:36149616-36152092	protein_coding	1294	0	0.1961	0	0
ENSG00000053501	USE1	chr19:17326154-17330638	protein_coding	2431	4.5426	3.6528	5.2926	5.3202
ENSG00000053524	MCF2L2	chr3:182895830-183146566	protein_coding	20568	0.0264	0.0164	0.0222	0.0419
ENSG00000053702	NRIP2	chr12:2934513-2944710	protein_coding	2803	0.9526	0.5431	0.1265	0.2051
ENSG00000053747	LAMA3	chr18:21269406-21535030	protein_coding	13522	0.0569	0.0625	0.1011	0.1842
ENSG00000053770	AP5M1	chr14:57735626-57756797	protein_coding	4371	9.2048	10.5834	8.6222	8.1972
ENSG00000053900	ANAPC4	chr4:25378834-25420120	protein_coding	7494	6.3714	6.6582	4.9817	4.8067
ENSG00000053918	KCNQ1	chr11:2465913-2870339	protein_coding	3971	1.2081	1.5334	0.7016	0.6755
ENSG00000054116	TRAPPC3	chr1:36602172-36615098	protein_coding	3313	10.9149	11.2829	11.2533	10.7861
ENSG00000054118	THRAP3	chr1:36690016-36770958	protein_coding	4736	88.7195	77.8564	82.4537	76.9494
ENSG00000054148	PHPT1	chr9:139743175-139745488	protein_coding	1908	17.1734	21.8519	20.1506	18.1763
ENSG00000054179	ENTPD2	chr9:139942549-139948497	protein_coding	2633	0.0172	0	0	0
ENSG00000054219	LY75	chr2:160628361-160761260	protein_coding	9430	0.0096	0	0.0054	0
ENSG00000054267	ARID4B	chr1:235294948-235491534	protein_coding	11073	13.729	11.3723	11.1713	10.6851
ENSG00000054277	OPN3	chr1:241753403-241840678	protein_coding	3480	4.6038	6.0998	8.1805	6.552
ENSG00000054282	SDCCAG8	chr1:243419319-243663394	protein_coding	5353	7.3556	6.8251	6.0847	6.8008
ENSG00000054356	PTPRN	chr2:220154344-220174370	protein_coding	8261	0.0164	0.0205	0.0797	0
ENSG00000054392	HHAT	chr1:210501595-210849638	protein_coding	4296	2.9498	3.3072	2.9006	2.1185
ENSG00000054523	KIF1B	chr1:10270862-10441661	protein_coding	17693	10.0784	10.8838	8.2254	9.6273
ENSG00000054598	FOXC1	chr6:1610680-1614127	protein_coding	3447	11.6329	9.5685	11.2861	4.8638
ENSG00000054611	TBC1D22A	chr22:47158517-47571336	protein_coding	5305	2.5423	2.471	3.4279	2.0587
ENSG00000054654	SYNE2	chr14:64319682-64693165	protein_coding	31405	22.7551	23.4067	23.2557	20.8474
ENSG00000054690	PLEKHH1	chr14:68000017-68056329	protein_coding	10817	0.4937	0.4222	0.562	0.5314
ENSG00000054793	ATP9A	chr20:50213052-50385173	protein_coding	8317	7.5584	8.8669	7.8751	7.7983
ENSG00000054796	SPO11	chr20:55904814-55919050	protein_coding	1867	0	0	0	0
ENSG00000054803	CBLN4	chr20:54572495-54580528	protein_coding	3024	0.015	0	0	0.0317
ENSG00000054938	CHRDL2	chr11:74407473-74442430	protein_coding	3073	0.1473	0.1101	0.2473	0.3429
ENSG00000054965	FAM168A	chr11:73111531-73309234	protein_coding	7823	13.3813	13.6213	13.6237	11.0706
ENSG00000054967	RELT	chr11:73087308-73108519	protein_coding	6322	0.7588	0.9899	0.7532	0.7274
ENSG00000054983	GALC	chr14:88304163-88460009	protein_coding	6825	5.8753	5.5017	5.9599	5.4463
ENSG00000055044	NOP58	chr2:203130438-203168389	protein_coding	3299	42.6652	36.9917	39.1545	48.2932
ENSG00000055070	SZRD1	chr1:16679069-16724640	protein_coding	4747	14.8826	14.2703	17.4471	17.659
ENSG00000055118	KCNH2	chr7:150642048-150675403	protein_coding	7017	8.862	9.7141	7.8325	7.591
ENSG00000055130	CUL1	chr7:148395005-148498128	protein_coding	3548	34.6196	35.3252	34.7648	39.2336
ENSG00000055147	FAM114A2	chr5:153369687-153418496	protein_coding	6543	4.247	3.9035	3.2439	4.6269
ENSG00000055163	CYFIP2	chr5:156693088-156822606	protein_coding	10509	3.7295	3.7099	4.3671	3.5736
ENSG00000055208	TAB2	chr6:149539776-149732749	protein_coding	5758	21.4422	19.7988	21.2456	20.7478
ENSG00000055211	GINM1	chr6:149887429-149912884	protein_coding	2248	11.0931	13.0919	11.2217	9.3757
ENSG00000055332	EIF2AK2	chr2:37326352-37384208	protein_coding	10753	17.2901	16.1229	16.3041	15.0836
ENSG00000055483	USP36	chr17:76783462-76837523	protein_coding	10409	2.5175	2.6568	2.005	3.1845
ENSG00000055609	KMT2C	chr7:151832009-152133090	protein_coding	22650	10.2865	11.0297	8.8585	9.686
ENSG00000055732	MCOLN3	chr1:85483764-85514182	protein_coding	6623	0.0752	0.0638	0.0918	0.1157
ENSG00000055813	CCDC85A	chr2:56411257-56613308	protein_coding	3982	0	0.085	0.0127	0.1203
ENSG00000055917	PUM2	chr2:20448451-20551995	protein_coding	6858	16.6764	17.9426	15.0754	17.4339
ENSG00000055950	MRPL43	chr10:102729214-102747272	protein_coding	3573	7.6253	8.2369	9.683	8.9019
ENSG00000055955	ITIH4	chr3:52846990-52865495	protein_coding	5462	0.0829	0.0619	0.0371	0.1052
ENSG00000055957	ITIH1	chr3:52811602-52826078	protein_coding	4543	0	0	0	0.0211
ENSG00000056050	C4orf27	chr4:170650615-170679104	protein_coding	1436	25.2764	21.9083	19.6836	19.881
ENSG00000056097	ZFR	chr5:32354455-32444867	protein_coding	6792	46.2642	41.0402	46.7621	52.034
ENSG00000056277	ZNF280C	chrX:129336684-129402873	protein_coding	4634	21.6524	17.6843	21.3377	21.17
ENSG00000056291	NPFFR2	chr4:72897520-73013784	protein_coding	2359	0	0	0	0
ENSG00000056487	PHF21B	chr22:45277041-45405880	protein_coding	5753	1.0542	1.2936	1.1887	1.5986
ENSG00000056558	TRAF1	chr9:123664670-123691451	protein_coding	6449	0.8772	0.6819	0.7776	0.6091
ENSG00000056586	RC3H2	chr9:125606834-125667620	protein_coding	11545	12.8816	13.5445	12.395	13.7833
ENSG00000056661	PCGF2	chr17:36890149-36906070	protein_coding	3511	3.532	4.3357	3.6213	3.5199
ENSG00000056736	IL17RB	chr3:53880606-53899827	protein_coding	3038	0.2086	0.3619	0.2001	0.3153
ENSG00000056972	TRAF3IP2	chr6:111877656-111927481	protein_coding	6553	0.4696	0.3485	0.9663	0.614
ENSG00000056998	GYG2	chrX:2746828-2800859	protein_coding	3646	5.8341	6.3324	4.9182	5.4654
ENSG00000057019	DCBLD2	chr3:98514784-98620533	protein_coding	11274	8.9159	8.8591	9.2019	9.6278
ENSG00000057149	SERPINB3	chr18:61322430-61329197	protein_coding	1777	0	0	0	0
ENSG00000057252	SOAT1	chr1:179262924-179327815	protein_coding	7033	4.659	5.1587	5.4307	5.0128
ENSG00000057294	PKP2	chr12:32943678-33049774	protein_coding	6069	0.6488	0.6131	0.7846	0.7419
ENSG00000057468	MSH4	chr1:76262566-76378923	protein_coding	3266	0.3603	0.1036	0.2947	0.1173
ENSG00000057593	F7	chr13:113760104-113774995	protein_coding	3792	0.3342	0.3568	0.2137	0.0253
ENSG00000057608	GDI2	chr10:5807185-5884095	protein_coding	4033	113.633	119.737	117.852	122.218
ENSG00000057657	PRDM1	chr6:106534194-106557814	protein_coding	6369	0.0497	0.0266	0.0557	0.015
ENSG00000057663	ATG5	chr6:106632350-106773666	protein_coding	3924	6.0667	6.832	5.4993	6.8116
ENSG00000057704	TMCC3	chr12:94960899-95044338	protein_coding	6515	7.3983	8.0871	6.5	7.0142
ENSG00000057757	PITHD1	chr1:24104894-24114722	protein_coding	2186	13.1261	14.5078	13.5328	13.9365
ENSG00000057935	MTA3	chr2:42721708-42984087	protein_coding	10580	5.4968	5.7233	5.9561	5.6594
ENSG00000058056	USP13	chr3:179370542-179507189	protein_coding	8440	4.0271	5.0001	3.7331	4.4496
ENSG00000058063	ATP11B	chr3:182511287-182639423	protein_coding	9196	16.4181	15.8915	16.2057	18.6792
ENSG00000058085	LAMC2	chr1:183155372-183214035	protein_coding	6543	0.4842	0.685	1.8348	0.2782
ENSG00000058091	CDK14	chr7:90095737-90839905	protein_coding	6841	23.8496	23.6491	26.0347	28.5825
ENSG00000058262	SEC61A1	chr3:127770483-127790526	protein_coding	4697	48.4859	51.6391	54.3327	48.2173
ENSG00000058272	PPP1R12A	chr12:80167342-80329240	protein_coding	12490	21.8572	17.2798	19.0373	20.0579
ENSG00000058335	RASGRF1	chr15:79252288-79383115	protein_coding	8683	0.0052	0	0.0058	0
ENSG00000058404	CAMK2B	chr7:44256748-44374176	protein_coding	8159	0.8653	0.7359	0.4905	0.4932
ENSG00000058453	CROCC	chr1:17066767-17299474	protein_coding	8871	3.0764	3.4797	2.5467	2.8619
ENSG00000058600	POLR3E	chr16:22308729-22346424	protein_coding	9454	4.8398	6.3245	4.6883	5.5126
ENSG00000058668	ATP2B4	chr1:203595688-203713209	protein_coding	9721	43.6565	46.9354	38.7587	40.2092
ENSG00000058673	ZC3H11A	chr1:203764781-203823252	protein_coding	9700	30.2669	33.5667	26.2362	27.8419
ENSG00000058729	RIOK2	chr5:96496570-96518964	protein_coding	5502	8.0859	6.9938	6.8406	7.2435
ENSG00000058799	YIPF1	chr1:54317391-54356407	protein_coding	2259	8.9154	9.6588	8.8125	7.8881
ENSG00000058804	NDC1	chr1:54231132-54304533	protein_coding	5135	19.0375	19.4834	20.5777	20.7276
ENSG00000058866	DGKG	chr3:185823456-186080026	protein_coding	10978	0	0	0	0.0087
ENSG00000059122	FLYWCH1	chr16:2961937-3001209	protein_coding	8413	1.4632	1.8597	1.6437	1.469
ENSG00000059145	UNKL	chr16:1413205-1464752	protein_coding	8504	0.8888	0.9746	1.0186	1.0702
ENSG00000059377	TBXAS1	chr7:139476849-139720125	protein_coding	6271	0.1299	0.027	0.0808	0.0917
ENSG00000059378	PARP12	chr7:139723543-139763521	protein_coding	6285	0.3672	0.4306	0.3627	0.2591
ENSG00000059573	ALDH18A1	chr10:97365695-97416463	protein_coding	3756	32.0156	32.063	34.9569	36.9589
ENSG00000059588	TARBP1	chr1:234527058-234614849	protein_coding	7743	4.4071	5.0242	3.6178	3.7242
ENSG00000059691	PET112	chr4:152591655-152682175	protein_coding	11757	2.1903	2.1436	2.3912	2.1838
ENSG00000059728	MXD1	chr2:70124819-70170077	protein_coding	6321	0.9308	0.669	1.0338	1.3186
ENSG00000059758	CDK17	chr12:96672038-96794338	protein_coding	6547	7.051	7.8151	7.2652	7.7409
ENSG00000059769	DNAJC25	chr9:114393631-114432508	protein_coding	3675	4.0147	3.728	3.4597	2.9979
ENSG00000059804	SLC2A3	chr12:8071825-8088871	protein_coding	6159	7.0396	7.9229	13.8831	15.4304
ENSG00000059915	PSD	chr10:104162375-104181296	protein_coding	6327	0.1001	0.2406	0.3122	0.1666
ENSG00000060069	CTDP1	chr18:77439800-77514510	protein_coding	5296	4.0592	4.4872	3.9598	3.636
ENSG00000060138	YBX3	chr12:10851682-10875911	protein_coding	8615	17.8511	17.3559	19.6858	19.9723
ENSG00000060140	STYK1	chr12:10771537-10826917	protein_coding	3424	0	0.0247	0	0.028
ENSG00000060237	WNK1	chr12:861758-1020618	protein_coding	14370	25.0856	25.3771	24.4146	25.874
ENSG00000060303	RPS17P5	chr6:50824967-50825375	pseudogene	408	0	0	0	0
ENSG00000060339	CCAR1	chr10:70480768-70552134	protein_coding	6002	50.8305	38.6077	48.3342	53.7911
ENSG00000060491	OGFR	chr20:61436186-61445352	protein_coding	4702	4.3699	7.0146	4.3523	4.1157
ENSG00000060558	GNA15	chr19:3136190-3163767	protein_coding	2613	0	0	0.0194	0
ENSG00000060566	CREB3L3	chr19:4153597-4173051	protein_coding	2678	0	0	0	0
ENSG00000060642	PIGV	chr1:27113962-27124889	protein_coding	3382	1.9672	3.0507	2.4264	2.6911
ENSG00000060656	PTPRU	chr1:29563027-29653325	protein_coding	6700	4.3569	4.7334	4.5136	6.1628
ENSG00000060688	SNRNP40	chr1:31732416-31769662	protein_coding	4011	15.6163	18.4913	16.9229	17.3643
ENSG00000060709	RIMBP2	chr12:130880681-131200826	protein_coding	8738	0.1865	0.2323	0.2899	0.2302
ENSG00000060718	COL11A1	chr1:103342022-103574052	protein_coding	8265	1.5332	1.4018	2.0532	1.7271
ENSG00000060749	QSER1	chr11:32914723-33014862	protein_coding	10537	18.9116	19.6879	15.9412	17.3748
ENSG00000060762	MPC1	chr6:166778406-166796486	protein_coding	1526	10.321	8.8118	10.0248	9.417
ENSG00000060971	ACAA1	chr3:38144619-38178733	protein_coding	7106	3.4647	3.6537	3.0225	2.7638
ENSG00000060982	BCAT1	chr12:24964294-25102393	protein_coding	10372	69.711	64.6021	68.2712	71.8333
ENSG00000061273	HDAC7	chr12:48176504-48226915	protein_coding	9936	5.1061	7.1582	6.0617	5.8141
ENSG00000061337	LZTS1	chr8:20103675-20161474	protein_coding	5706	11.4295	14.4212	13.4761	12.5587
ENSG00000061455	PRDM6	chr5:122424815-122529960	protein_coding	9350	0.0387	0.0181	0.0488	0.0307
ENSG00000061492	WNT8A	chr5:137419580-137428054	protein_coding	2089	0	0	0.0242	0
ENSG00000061656	SPAG4	chr20:34203813-34208971	protein_coding	2240	0.0606	0.1133	0.2488	0.1283
ENSG00000061676	NCKAP1	chr2:183773842-183903586	protein_coding	22520	10.2253	10.6953	9.6159	8.9336
ENSG00000061794	MRPS35	chr12:27863705-27909228	protein_coding	1979	24.4471	27.1361	25.8011	26.1895
ENSG00000061918	GUCY1B3	chr4:156680143-156728743	protein_coding	3724	9.5888	8.834	7.046	5.9941
ENSG00000061936	SFSWAP	chr12:132195625-132284282	protein_coding	10157	8.5998	8.343	8.1691	9.2812
ENSG00000061938	TNK2	chr3:195590234-195638816	protein_coding	11297	2.3316	2.6651	1.9954	2.6967
ENSG00000061987	MON2	chr12:62860596-62991363	protein_coding	13121	9.4234	10.3449	7.7637	8.1703
ENSG00000062038	CDH3	chr16:68670091-68756519	protein_coding	5009	0.3253	0.5234	1.2439	1.2432
ENSG00000062096	ARSF	chrX:2959511-3030767	protein_coding	2215	0.0409	0	0.0457	0
ENSG00000062194	GPBP1	chr5:56469774-56560506	protein_coding	6493	24.5005	24.1351	22.1251	21.7632
ENSG00000062282	DGAT2	chr11:75470556-75512579	protein_coding	7904	0.2176	0.3531	0.4486	0.3273
ENSG00000062370	ZNF112	chr19:44830707-44871377	protein_coding	3848	8.1154	8.5054	6.4109	5.8756
ENSG00000062485	CS	chr12:56665482-56694176	protein_coding	6402	30.0094	27.5429	36.8401	40.6285
ENSG00000062524	LTK	chr15:41795835-41806085	protein_coding	3490	0	0.0485	0.1016	0.2196
ENSG00000062582	MRPS24	chr7:43906156-43909492	protein_coding	2613	1.5415	1.683	1.357	1.5765
ENSG00000062598	ELMO2	chr20:44994687-45061704	protein_coding	6714	8.9316	8.2757	8.6462	9.0038
ENSG00000062650	WAPAL	chr10:88195012-88281572	protein_coding	7280	21.6343	21.7351	18.9191	20.3843
ENSG00000062716	VMP1	chr17:57784552-57919616	protein_coding	6916	13.9059	15.1141	19.4388	17.1491
ENSG00000062725	APPBP2	chr17:58520519-58603580	protein_coding	9866	11.4361	11.7521	10.4073	10.0988
ENSG00000062822	POLD1	chr19:50887460-50921273	protein_coding	4856	8.0059	9.5612	8.2721	7.3588
ENSG00000063015	SEZ6	chr17:27281918-27333458	protein_coding	5103	0.0355	0.116	0.0496	0.0563
ENSG00000063046	EIF4B	chr12:53399941-53435993	protein_coding	6147	201.213	181.235	192.93	200.021
ENSG00000063127	SLC6A16	chr19:49792894-49828482	protein_coding	3599	0.4779	0.5405	0.4785	0.4525
ENSG00000063169	GLTSCR1	chr19:48111452-48206533	protein_coding	7147	0.4813	0.5562	0.3615	0.4558
ENSG00000063176	SPHK2	chr19:49122547-49133974	protein_coding	6008	1.9812	2.4915	2.1921	2.4716
ENSG00000063177	RPL18	chr19:49118584-49122793	protein_coding	4209	124.086	137.616	125.477	132.744
ENSG00000063180	CA11	chr19:49141198-49149569	protein_coding	2075	8.0701	5.4207	8.6175	8.9108
ENSG00000063241	ISOC2	chr19:55964351-55973710	protein_coding	4408	2.69	3.8371	3.436	3.4122
ENSG00000063244	U2AF2	chr19:56165511-56186081	protein_coding	4115	31.7521	32.4307	33.3598	36.342
ENSG00000063245	EPN1	chr19:56186591-56221224	protein_coding	3849	10.1475	10.0852	9.1861	9.5578
ENSG00000063322	MED29	chr19:39881942-39891277	protein_coding	3835	8.4497	9.3502	8.9687	9.7176
ENSG00000063438	AHRR	chr5:304290-438406	protein_coding	7678	0.0589	0.1212	0.1122	0.0374
ENSG00000063515	GSC2	chr22:19136088-19137796	protein_coding	1033	0	0	0	0
ENSG00000063587	ZNF275	chrX:152599612-152625568	protein_coding	8148	2.6995	2.8543	3.1271	2.8571
ENSG00000063601	MTMR1	chrX:149861434-149933576	protein_coding	6332	5.1891	5.703	5.4639	5.5981
ENSG00000063660	GPC1	chr2:241375087-241407493	protein_coding	6514	22.768	27.6146	21.2606	24.6051
ENSG00000063761	ADCK1	chr14:78266425-78401355	protein_coding	5317	0.9108	1.3997	1.2195	1.4234
ENSG00000063854	HAGH	chr16:1845620-1877195	protein_coding	5052	2.2396	2.2264	2.3663	2.4463
ENSG00000063978	RNF4	chr4:2463946-2627047	protein_coding	7276	9.9834	11.2862	12.6847	11.4552
ENSG00000064012	CASP8	chr2:202098165-202152434	protein_coding	6808	0.4587	0.7081	1.0714	0.3659
ENSG00000064042	LIMCH1	chr4:41361623-41702061	protein_coding	10862	5.2791	5.3256	3.7028	8.476
ENSG00000064102	ASUN	chr12:27058113-27091259	protein_coding	3345	17.9544	17.167	15.6433	20.4207
ENSG00000064115	TM7SF3	chr12:27126127-27167367	protein_coding	3888	5.7969	6.6995	4.8727	5.2484
ENSG00000064195	DLX3	chr17:48067368-48072588	protein_coding	2715	0.05	0.0311	0.0187	0
ENSG00000064199	SPA17	chr11:124543693-124567414	protein_coding	5205	1.8521	1.6573	2.8515	2.7977
ENSG00000064201	TSPAN32	chr11:2323226-2339430	protein_coding	3793	0	0.0223	0	0
ENSG00000064205	WISP2	chr20:43343484-43357150	protein_coding	4981	0.0182	0	0	0
ENSG00000064218	DMRT3	chr9:976963-991731	protein_coding	2387	2.0856	1.5943	3.2044	1.3646
ENSG00000064225	ST3GAL6	chr3:98451079-98540045	protein_coding	6288	0.1727	0.2017	0.282	0.2133
ENSG00000064270	ATP2C2	chr16:84402132-84497793	protein_coding	6693	0.71	0.3791	0.3633	0.6155
ENSG00000064300	NGFR	chr17:47572654-47592379	protein_coding	4150	79.0652	82.1456	62.1777	86.3607
ENSG00000064309	CDON	chr11:125825690-125933230	protein_coding	10600	44.2248	48.0856	46.4498	51.8417
ENSG00000064313	TAF2	chr8:120743014-120845103	protein_coding	6547	14.192	13.7313	14.0584	17.0767
ENSG00000064393	HIPK2	chr7:139246315-139477577	protein_coding	15220	5.5814	6.4011	5.6679	6.7036
ENSG00000064419	TNPO3	chr7:128594947-128695198	protein_coding	3933	20.8166	22.1479	24.1491	22.0202
ENSG00000064489	MEF2BNB-MEF2B	chr19:19256375-19302967	protein_coding	1931	0	0	0	0
ENSG00000064490	RFXANK	chr19:19303007-19312678	protein_coding	2533	15.8841	17.8623	17.2984	15.3556
ENSG00000064545	TMEM161A	chr19:19229977-19249322	protein_coding	3281	3.752	5.4129	4.5854	3.9419
ENSG00000064547	LPAR2	chr19:19734476-19739739	protein_coding	2980	5.6497	6.0164	6.2724	7.9085
ENSG00000064601	CTSA	chr20:44518782-44527459	protein_coding	5856	3.0373	4.0437	3.9012	3.5991
ENSG00000064607	SUGP2	chr19:19101696-19144832	protein_coding	7744	22.5121	25.1943	22.8681	23.3691
ENSG00000064651	SLC12A2	chr5:127419457-127525380	protein_coding	10664	5.9713	6.7013	7.0207	7.3038
ENSG00000064652	SNX24	chr5:122179133-122365049	protein_coding	3550	3.2892	3.5258	3.9811	3.3463
ENSG00000064655	EYA2	chr20:45523262-45817492	protein_coding	3618	12.0088	11.0564	24.8796	36.0384
ENSG00000064666	CNN2	chr19:1026297-1039068	protein_coding	3928	47.8505	57.1412	57.1934	50.6328
ENSG00000064687	ABCA7	chr19:1040101-1065571	protein_coding	8365	1.0767	1.2739	1.2898	1.1796
ENSG00000064692	SNCAIP	chr5:121647048-121799914	protein_coding	7325	3.114	2.9672	2.9183	3.0866
ENSG00000064703	DDX20	chr1:112297866-112310638	protein_coding	6019	11.5796	9.8916	10.0738	11.3804
ENSG00000064726	BTBD1	chr15:83685173-83736106	protein_coding	4169	18.7698	18.5613	19.1855	21.6469
ENSG00000064763	FAR2	chr12:29302035-29493913	protein_coding	5411	0.7109	0.7346	0.7676	0.6905
ENSG00000064787	BCAS1	chr20:52553315-52687304	protein_coding	9024	0.015	0.0187	0.0393	0.0106
ENSG00000064835	POU1F1	chr3:87308553-87325737	protein_coding	1569	0	0	0	0
ENSG00000064886	CHI3L2	chr1:111743392-111786062	protein_coding	3295	0	0	0	0
ENSG00000064932	SBNO2	chr19:1107635-1174282	protein_coding	6476	2.3062	2.5857	2.5265	2.6924
ENSG00000064933	PMS1	chr2:190649106-190742355	protein_coding	5152	14.31	13.8215	12.0247	13.2026
ENSG00000064961	HMG20B	chr19:3572774-3579086	protein_coding	3857	12.661	11.8623	12.4635	12.5683
ENSG00000064989	CALCRL	chr2:188207855-188313187	protein_coding	6144	2.2762	1.9408	1.4098	1.3878
ENSG00000064995	TAF11	chr6:34845554-34855866	protein_coding	1580	20.2802	26.6023	21.0956	20.7976
ENSG00000064999	ANKS1A	chr6:34857041-35059179	protein_coding	6766	7.077	9.6245	7.5316	8.8779
ENSG00000065000	AP3D1	chr19:2100987-2164464	protein_coding	8618	19.7302	19.5284	20.6077	21.2548
ENSG00000065029	ZNF76	chr6:35226685-35263762	protein_coding	6789	2.1932	3.1267	2.6936	2.8646
ENSG00000065054	SLC9A3R2	chr16:2075356-2089027	protein_coding	3550	5.7114	4.3357	7.0061	5.7212
ENSG00000065057	NTHL1	chr16:2089815-2097867	protein_coding	1658	7.9707	7.2431	9.4406	10.1696
ENSG00000065060	UHRF1BP1	chr6:34759856-34850915	protein_coding	9844	5.871	6.2285	5.8508	5.012
ENSG00000065135	GNAI3	chr1:110091232-110136975	protein_coding	3206	42.2794	44.1319	45.2831	44.5544
ENSG00000065150	IPO5	chr13:98605911-98676551	protein_coding	9671	46.676	52.5386	45.1083	45.172
ENSG00000065154	OAT	chr10:126085871-126107545	protein_coding	3388	10.9939	12.1814	11.1388	10.01
ENSG00000065183	WDR3	chr1:118472342-118509165	protein_coding	10275	11.3464	10.3872	8.2724	12.2329
ENSG00000065243	PKN2	chr1:89149904-89301938	protein_coding	7014	14.0665	14.3965	14.0107	13.3856
ENSG00000065268	WDR18	chr19:983173-994569	protein_coding	2474	10.4273	13.6735	10.4627	10.8426
ENSG00000065308	TRAM2	chr6:52362199-52441713	protein_coding	6908	8.0518	8.8268	8.1028	6.851
ENSG00000065320	NTN1	chr17:8924858-9147317	protein_coding	6431	5.9607	6.5489	3.064	5.4374
ENSG00000065325	GLP2R	chr17:9725522-9795419	protein_coding	6052	0.015	0	0.0167	0.0633
ENSG00000065328	MCM10	chr10:13203553-13253104	protein_coding	5454	9.3686	10.6217	8.7955	9.3976
ENSG00000065357	DGKA	chr12:56321102-56347811	protein_coding	10215	0.8684	0.8279	1.0017	0.6565
ENSG00000065361	ERBB3	chr12:56473640-56497289	protein_coding	8651	23.0031	23.1883	21.2434	29.6787
ENSG00000065371	ROPN1	chr3:123687367-123711025	protein_coding	4395	0	0.0192	0	0
ENSG00000065413	ANKRD44	chr2:197831740-198175897	protein_coding	9228	0.9122	0.8981	0.9881	1.1939
ENSG00000065427	KARS	chr16:75661621-75682541	protein_coding	3815	34.1778	43.826	39.037	37.9443
ENSG00000065457	ADAT1	chr16:75630878-75657198	protein_coding	4486	4.0758	4.5622	3.7489	4.2925
ENSG00000065485	PDIA5	chr3:122785908-122944074	protein_coding	4030	4.391	3.4206	3.4189	3.3994
ENSG00000065491	TBC1D22B	chr6:37225547-37300746	protein_coding	3462	4.9546	6.0094	3.9945	3.7911
ENSG00000065518	NDUFB4	chr3:120315155-120321347	protein_coding	1889	19.2868	19.475	20.6214	21.3007
ENSG00000065526	SPEN	chr1:16174358-16266955	protein_coding	13294	9.2668	10.0004	6.1271	6.9686
ENSG00000065534	MYLK	chr3:123328895-123603178	protein_coding	22166	0.5329	0.5685	0.7473	0.4581
ENSG00000065548	ZC3H15	chr2:187350882-187374090	protein_coding	3125	36.2644	33.8824	33.943	42.245
ENSG00000065559	MAP2K4	chr17:11924140-12047147	protein_coding	5714	12.1264	12.6101	12.7303	12.5412
ENSG00000065600	TMEM206	chr1:212537272-212588243	protein_coding	2914	7.4705	7.4587	7.8051	9.2383
ENSG00000065609	SNAP91	chr6:84262598-84419410	protein_coding	6657	0.1428	0.1143	0.2968	0.3886
ENSG00000065613	SLK	chr10:105726958-105788991	protein_coding	7974	26.7325	21.7949	24.2159	22.2746
ENSG00000065615	CYB5R4	chr6:84569361-84677143	protein_coding	9635	2.1889	1.931	1.8664	1.8991
ENSG00000065618	COL17A1	chr10:105791043-105845760	protein_coding	6426	0.007	0.0395	0.0236	0.0596
ENSG00000065621	GSTO2	chr10:106028630-106064703	protein_coding	10344	0.0788	0.0981	0.0832	0.1111
ENSG00000065665	SEC61A2	chr10:12171635-12211960	protein_coding	3916	3.8486	4.1033	4.6697	5.4066
ENSG00000065675	PRKCQ	chr10:6469104-6622263	protein_coding	3285	2.4799	2.7032	3.2074	1.7498
ENSG00000065717	TLE2	chr19:2997635-3047633	protein_coding	4038	3.2727	4.1259	2.6845	3.369
ENSG00000065802	ASB1	chr2:239335382-239360891	protein_coding	7410	5.5702	5.6609	4.293	5.5465
ENSG00000065809	FAM107B	chr10:14560555-14816896	protein_coding	7019	4.9907	4.687	5.5498	6.0602
ENSG00000065833	ME1	chr6:83920107-84140797	protein_coding	3378	0.8039	1.2518	1.8145	0.709
ENSG00000065882	TBC1D1	chr4:37892707-38140796	protein_coding	9027	6.4776	7.5792	6.5655	5.6991
ENSG00000065883	CDK13	chr7:39989635-40136733	protein_coding	8921	15.0978	16.3908	14.5759	17.0964
ENSG00000065911	MTHFD2	chr2:74425688-74444692	protein_coding	4870	24.6085	28.3234	29.353	14.5376
ENSG00000065923	SLC9A7	chrX:46464752-46618490	protein_coding	3838	0.4599	0.5068	1.0031	0.624
ENSG00000065970	FOXJ2	chr12:8185298-8208099	protein_coding	6296	2.7819	2.982	2.3574	2.389
ENSG00000065978	YBX1	chr1:43148097-43168020	protein_coding	1930	607.607	531.262	632.114	637.16
ENSG00000065989	PDE4A	chr19:10527448-10580305	protein_coding	6644	0.6335	0.6364	0.6328	0.3749
ENSG00000066027	PPP2R5A	chr1:212458878-212535200	protein_coding	3820	3.4121	3.4315	3.9384	3.4108
ENSG00000066032	CTNNA2	chr2:79412356-80875905	protein_coding	7538	0.2462	0.1346	0.1949	0.0635
ENSG00000066044	ELAVL1	chr19:8023462-8070543	protein_coding	6956	15.0491	18.4314	17.6448	19.8877
ENSG00000066056	TIE1	chr1:43766663-43788779	protein_coding	6694	0.0068	0	0.0076	0
ENSG00000066084	DIP2B	chr12:50898767-51142450	protein_coding	10361	12.4884	12.8721	15.42	15.8854
ENSG00000066117	SMARCD1	chr12:50478754-50494495	protein_coding	5136	14.1167	13.0577	13.5021	14.5308
ENSG00000066135	KDM4A	chr1:44115828-44171186	protein_coding	5172	19.5488	21.6169	18.4227	18.3936
ENSG00000066136	NFYC	chr1:41157319-41237275	protein_coding	5990	8.7267	8.7536	10.038	12.3312
ENSG00000066185	ZMYND12	chr1:42895999-42921938	protein_coding	2195	0.0412	0	0.0923	0.2619
ENSG00000066230	SLC9A3	chr5:473424-524447	protein_coding	2783	0	0	0	0.0344
ENSG00000066248	NGEF	chr2:233743395-233877982	protein_coding	4687	0.0193	0.0361	0	0.0409
ENSG00000066279	ASPM	chr1:197053257-197115824	protein_coding	10887	38.2908	37.574	42.1219	46.788
ENSG00000066294	CD84	chr1:160510884-160549306	protein_coding	9255	0.0147	0.0091	0.0055	0
ENSG00000066322	ELOVL1	chr1:43829067-43833696	protein_coding	2458	9.7955	10.3219	12.839	10.7573
ENSG00000066336	SPI1	chr11:47376410-47400127	protein_coding	2069	0	0	0.049	0.0463
ENSG00000066379	ZNRD1	chr6:30026675-30032686	protein_coding	3672	3.5373	4.2608	4.0971	3.1047
ENSG00000066382	MPPED2	chr11:30406039-30608419	protein_coding	8198	10.4064	10.7802	12.1973	15.9281
ENSG00000066405	CLDN18	chr3:137717576-137752494	protein_coding	3877	0	0.0218	0.0131	0
ENSG00000066422	ZBTB11	chr3:101367732-101396339	protein_coding	7416	7.8603	7.766	6.0245	7.2472
ENSG00000066427	ATXN3	chr14:92524895-92572965	protein_coding	8470	3.8151	3.4148	3.4508	3.0426
ENSG00000066455	GOLGA5	chr14:93260575-93306308	protein_coding	3295	23.4737	19.1728	22.814	21.8645
ENSG00000066468	FGFR2	chr10:123237847-123357972	protein_coding	7543	1.284	1.4912	1.1484	1.3463
ENSG00000066557	LRRC40	chr1:70610487-70671303	protein_coding	2884	17.3876	18.4742	16.686	18.9678
ENSG00000066583	ISOC1	chr5:128430443-128449721	protein_coding	1940	7.1386	5.9723	6.7366	6.1728
ENSG00000066629	EML1	chr14:100204029-100408397	protein_coding	8899	5.6808	7.3556	6.6144	6.6208
ENSG00000066651	TRMT11	chr6:126307575-126360422	protein_coding	2690	12.0464	9.7775	9.9992	9.6871
ENSG00000066654	THUMPD1	chr16:20744985-20753406	protein_coding	5092	22.9845	20.6278	19.8761	21.8998
ENSG00000066697	MSANTD3	chr9:103189437-103213511	protein_coding	2763	11.4824	11.0496	13.0167	11.0261
ENSG00000066735	KIF26A	chr14:104605059-104647231	protein_coding	6756	2.0499	2.3408	1.9119	1.8718
ENSG00000066739	ATG2B	chr14:96747594-96830207	protein_coding	12722	6.7841	6.0227	5.9487	7.1238
ENSG00000066777	ARFGEF1	chr8:68085746-68255912	protein_coding	10970	8.8825	8.4956	7.716	8.5235
ENSG00000066813	ACSM2B	chr16:20547547-20587749	protein_coding	8155	0	0	0.0062	0.047
ENSG00000066827	ZFAT	chr8:135490030-135725292	protein_coding	8900	2.2985	2.043	2.1514	2.0883
ENSG00000066855	MTFR1	chr8:66556968-66683496	protein_coding	4629	4.869	3.6722	4.7055	5.9398
ENSG00000066923	STAG3	chr7:99775185-99819111	protein_coding	8583	0.1318	0.2759	0.2007	0.1786
ENSG00000066926	FECH	chr18:55215514-55254004	protein_coding	4473	4.2192	3.4789	4.8356	4.1979
ENSG00000066933	MYO9A	chr15:72114631-72410918	protein_coding	20250	7.3754	7.1624	6.5514	8.0805
ENSG00000067048	DDX3Y	chrY:15016018-15032390	protein_coding	5738	0	0	0	0
ENSG00000067057	PFKP	chr10:3108524-3179904	protein_coding	4827	10.9137	10.6874	12.467	7.9786
ENSG00000067064	IDI1	chr10:1085847-1095110	protein_coding	3589	30.441	29.7611	29.3007	32.9129
ENSG00000067066	SP100	chr2:231280656-231408805	protein_coding	12691	0.0428	0.0267	0.0878	0.0075
ENSG00000067082	KLF6	chr10:3818187-3827473	protein_coding	6139	15.6512	14.4923	14.3244	17.2441
ENSG00000067113	PPAP2A	chr5:54720681-54830878	protein_coding	2016	4.1756	3.9433	4.5228	3.8017
ENSG00000067141	NEO1	chr15:73344050-73597547	protein_coding	8117	9.7798	9.2625	11.5951	10.8467
ENSG00000067167	TRAM1	chr8:71485676-71520622	protein_coding	3878	48.4441	40.5843	42.5566	36.2409
ENSG00000067177	PHKA1	chrX:71798663-71934167	protein_coding	6350	1.96	2.4506	3.8291	3.1381
ENSG00000067182	TNFRSF1A	chr12:6437922-6451280	protein_coding	4005	5.379	5.638	6.3366	4.2818
ENSG00000067191	CACNB1	chr17:37329708-37353956	protein_coding	7094	1.5567	2.0147	1.9065	1.9582
ENSG00000067208	EVI5	chr1:92974252-93257961	protein_coding	8276	7.492	7.2451	7.2714	7.5244
ENSG00000067221	STOML1	chr15:74275546-74286963	protein_coding	6178	0.6447	0.7666	0.8199	0.2946
ENSG00000067225	PKM	chr15:72491369-72524164	protein_coding	8572	176.993	160.992	234.561	226.754
ENSG00000067248	DHX29	chr5:54552072-54603550	protein_coding	4728	20.8773	19.98	18.985	21.4785
ENSG00000067334	DNTTIP2	chr1:94333372-94345474	protein_coding	5985	16.2279	15.1054	14.6083	16.3592
ENSG00000067365	METTL22	chr16:8715539-8740081	protein_coding	4824	2.8333	2.7699	4.0008	4.4287
ENSG00000067369	TP53BP1	chr15:43699406-43802926	protein_coding	8843	19.6836	21.6615	20.9025	18.4498
ENSG00000067445	TRO	chrX:54946894-54957864	protein_coding	6716	24.0577	25.7515	24.7166	25.263
ENSG00000067533	RRP15	chr1:218458628-218511325	protein_coding	7883	6.9871	6.0293	6.2974	8.6773
ENSG00000067560	RHOA	chr3:49396577-49450431	protein_coding	2582	117.264	128.559	133.799	128.009
ENSG00000067596	DHX8	chr17:41561232-41621831	protein_coding	9302	10.4996	11.3191	10.2922	9.6812
ENSG00000067601	PMS2P4	chr7:66752527-66767894	pseudogene	1327	1.5347	2.358	1.1834	1.4439
ENSG00000067606	PRKCZ	chr1:1981908-2116834	protein_coding	7636	2.2226	1.9714	1.1742	1.4052
ENSG00000067646	ZFY	chrY:2803111-2850547	protein_coding	5737	0.0158	0.0295	0.0441	0.0167
ENSG00000067704	IARS2	chr1:220267443-220321380	protein_coding	4162	20.0736	24.0382	20.0698	20.026
ENSG00000067715	SYT1	chr12:79257772-79845788	protein_coding	6494	1.5123	1.7972	2.9641	1.4605
ENSG00000067798	NAV3	chr12:78224684-78606790	protein_coding	11179	5.0849	5.1519	6.8604	6.7959
ENSG00000067829	IDH3G	chrX:153051220-153059978	protein_coding	2710	13.9448	12.7636	15.6825	17.7818
ENSG00000067836	ROGDI	chr16:4846968-4852951	protein_coding	3683	3.0721	2.5029	3.0533	3.2515
ENSG00000067840	PDZD4	chrX:153067620-153096020	protein_coding	4381	1.9938	2.22	2.1159	2.0993
ENSG00000067842	ATP2B3	chrX:152783133-152848397	protein_coding	7534	0.2283	0.2919	0.2286	0.3306
ENSG00000067900	ROCK1	chr18:18526866-18691812	protein_coding	11064	13.6216	12.6504	12.2105	11.8714
ENSG00000067955	CBFB	chr16:67063018-67134961	protein_coding	4129	16.31	18.2701	15.9241	20.7197
ENSG00000067992	PDK3	chrX:24483337-24557954	protein_coding	2695	6.5326	6.7154	8.7401	7.1807
ENSG00000068001	HYAL2	chr3:50355220-50360337	protein_coding	4545	7.3986	7.8337	8.5707	8.2839
ENSG00000068024	HDAC4	chr2:239969863-240323348	protein_coding	13443	2.3903	2.7681	2.2081	2.3518
ENSG00000068028	RASSF1	chr3:50367218-50378411	protein_coding	3677	1.2431	2.438	1.8047	1.1725
ENSG00000068078	FGFR3	chr4:1795033-1810599	protein_coding	4834	0.2341	0.5074	0.241	0.4756
ENSG00000068079	IFI35	chr17:41158741-41166473	protein_coding	1973	0	0.0429	0.1027	0.0971
ENSG00000068097	HEATR6	chr17:58120554-58156292	protein_coding	4866	8.4824	8.5162	8.3384	8.2493
ENSG00000068120	COASY	chr17:40713484-40718295	protein_coding	4032	6.0726	6.5442	5.6912	5.7976
ENSG00000068137	PLEKHH3	chr17:40819931-40829048	protein_coding	4839	2.0857	1.8001	1.4237	0.9305
ENSG00000068305	MEF2A	chr15:100017369-100256671	protein_coding	7030	7.6095	7.3503	8.1063	8.4355
ENSG00000068308	OTUD5	chrX:48779304-48815648	protein_coding	3329	11.8957	12.7275	14.2881	12.2307
ENSG00000068323	TFE3	chrX:48886241-48901012	protein_coding	4278	6.3793	6.4248	6.8322	5.5538
ENSG00000068354	TBC1D25	chrX:48397844-48420997	protein_coding	4223	1.6826	2.0627	1.5114	2.0417
ENSG00000068366	ACSL4	chrX:108867472-108976632	protein_coding	6415	16.7839	17.1251	19.3066	20.8779
ENSG00000068383	INPP5A	chr10:134351323-134596979	protein_coding	3701	10.162	11.4482	13.8922	11.545
ENSG00000068394	GPKOW	chrX:48970333-48980151	protein_coding	1735	11.1384	11.9423	11.2697	12.0374
ENSG00000068400	GRIPAP1	chrX:48830133-48858675	protein_coding	5779	8.4736	6.3658	7.5996	7.145
ENSG00000068438	FTSJ1	chrX:48334540-48344752	protein_coding	2740	19.2099	18.3031	21.9814	22.2373
ENSG00000068489	PRR11	chr17:57232859-57282066	protein_coding	4080	17.4598	15.629	23.1673	24.4202
ENSG00000068615	REEP1	chr2:86441115-86565206	protein_coding	5326	1.3936	1.6832	1.3506	1.3311
ENSG00000068650	ATP11A	chr13:113344642-113541482	protein_coding	12172	2.0116	2.2095	2.5344	2.6052
ENSG00000068654	POLR1A	chr2:86247338-86333278	protein_coding	13519	10.7328	12.7428	11.091	12.9754
ENSG00000068697	LAPTM4A	chr2:20232410-20251789	protein_coding	1946	86.5391	90.0899	80.6422	75.5687
ENSG00000068724	TTC7A	chr2:47143295-47303276	protein_coding	6949	0.8467	1.0588	0.9039	0.8823
ENSG00000068745	IP6K2	chr3:48725435-48777786	protein_coding	5624	18.4283	18.2104	16.2576	14.7008
ENSG00000068781	STON1-GTF2A1L	chr2:48757063-49003654	protein_coding	4294	0.0527	0.0197	0.0472	0
ENSG00000068784	SRBD1	chr2:45615818-45839304	protein_coding	5045	12.003	11.6337	11.5066	11.3937
ENSG00000068793	CYFIP1	chr15:22892004-23006016	protein_coding	10435	13.5319	14.5881	13.2669	14.0008
ENSG00000068796	KIF2A	chr5:61601988-61833076	protein_coding	4774	17.2822	18.4943	18.3033	18.8033
ENSG00000068831	RASGRP2	chr11:64494382-64512928	protein_coding	6084	0.1041	0.0417	0.0583	0.0315
ENSG00000068878	PSME4	chr2:54091203-54197977	protein_coding	10259	11.8935	12.2911	10.1123	11.8691
ENSG00000068885	IFT80	chr3:159974773-160117668	protein_coding	7175	5.7211	5.7048	4.4548	4.5531
ENSG00000068903	SIRT2	chr19:39369196-39390502	protein_coding	6204	17.6101	18.9343	12.5985	18.8702
ENSG00000068912	ERLEC1	chr2:54014180-54045956	protein_coding	2592	14.5971	15.1392	15.1457	14.3777
ENSG00000068971	PPP2R5B	chr11:64685024-64701945	protein_coding	3376	2.5605	2.7806	2.1006	1.4756
ENSG00000068976	PYGM	chr11:64513860-64527769	protein_coding	4981	0.1999	0.3735	0.6305	0.6924
ENSG00000068985	PAGE1	chrX:49452052-49460596	protein_coding	665	0	0	0	0
ENSG00000069011	PITX1	chr5:134363424-134370503	protein_coding	3511	1.9851	2.4569	4.2561	5.8393
ENSG00000069018	TRPC7	chr5:135548998-135732730	protein_coding	3608	0	0.1172	0	0
ENSG00000069020	MAST4	chr5:65892175-66465423	protein_coding	14697	3.1441	3.1649	2.8538	2.6987
ENSG00000069122	GPR116	chr6:46820248-46922680	protein_coding	6717	0.0202	0	0.0075	0
ENSG00000069188	SDK2	chr17:71330522-71640228	protein_coding	11607	2.4721	3.0311	4.0107	3.1612
ENSG00000069206	ADAM7	chr8:24298442-24384483	protein_coding	4483	0.0101	0	0	0
ENSG00000069248	NUP133	chr1:229577044-229644103	protein_coding	5057	20.6735	21.1385	19.7532	19.2666
ENSG00000069275	NUCKS1	chr1:205681946-205719404	protein_coding	6546	190.573	186.686	180.249	174.16
ENSG00000069329	VPS35	chr16:46690053-46723430	protein_coding	9723	16.8734	15.5085	16.2703	15.5385
ENSG00000069345	DNAJA2	chr16:46989298-47007699	protein_coding	5039	20.4779	18.4951	20.447	22.0922
ENSG00000069399	BCL3	chr19:45250961-45263301	protein_coding	3242	1.033	0.6261	0.8594	1.4184
ENSG00000069424	KCNAB2	chr1:6051525-6161253	protein_coding	9253	0.181	0.1645	0.3011	0.1967
ENSG00000069431	ABCC9	chr12:21950334-22094336	protein_coding	11421	3.3326	3.3322	4.2712	4.2948
ENSG00000069482	GAL	chr11:68451246-68458643	protein_coding	1300	0.1393	0	0.2728	0.2211
ENSG00000069493	CLEC2D	chr12:9817564-9848413	protein_coding	3219	1.8699	1.9179	0.9127	1.6369
ENSG00000069509	FUNDC1	chrX:44382884-44402247	protein_coding	1399	4.7555	4.7756	5.0691	5.2044
ENSG00000069535	MAOB	chrX:43625857-43741693	protein_coding	3050	0.549	0.2773	0.7806	0.534
ENSG00000069667	RORA	chr15:60780482-61521518	protein_coding	17033	1.658	1.5193	2.0907	1.7211
ENSG00000069696	DRD4	chr11:637292-640706	protein_coding	1477	0	0	0	0.1297
ENSG00000069702	TGFBR3	chr1:92145901-92371892	protein_coding	8654	2.709	2.5604	2.2653	1.9705
ENSG00000069712	KIAA1107	chr1:92632541-92650280	protein_coding	4623	1.1552	1.5367	1.1505	1.4506
ENSG00000069764	PLA2G10	chr16:14766404-14788526	protein_coding	1113	0	0	0	0
ENSG00000069812	HES2	chr1:6472477-6484730	protein_coding	5407	0.0251	0.0626	0.0562	0.0886
ENSG00000069849	ATP1B3	chr3:141594965-141645356	protein_coding	2584	19.4589	20.259	18.6036	22.1339
ENSG00000069869	NEDD4	chr15:56119119-56285944	protein_coding	9097	12.3978	12.8943	13.2304	12.3215
ENSG00000069943	PIGB	chr15:55611157-55647846	protein_coding	4539	1.4657	1.8632	1.6963	1.0342
ENSG00000069956	MAPK6	chr15:52244302-52358462	protein_coding	5281	26.8326	23.0443	27.0302	28.4813
ENSG00000069966	GNB5	chr15:52413116-52483566	protein_coding	7487	0.6045	0.6326	0.4601	0.4479
ENSG00000069974	RAB27A	chr15:55495163-55611311	protein_coding	5603	0.9289	0.7245	0.8408	0.5984
ENSG00000069998	CECR5	chr22:17618400-17646177	protein_coding	4936	6.1799	6.939	6.5577	5.9391
ENSG00000070010	UFD1L	chr22:19437432-19466738	protein_coding	8736	6.9783	6.883	7.1379	6.5908
ENSG00000070018	LRP6	chr12:12268958-12419946	protein_coding	10337	25.4464	24.0859	23.9628	24.0317
ENSG00000070019	GUCY2C	chr12:14765575-14849519	protein_coding	4167	0.0217	0	0.0122	0.046
ENSG00000070031	SCT	chr11:626430-627143	protein_coding	366	0	0	0	0.7853
ENSG00000070047	PHRF1	chr11:576485-612222	protein_coding	5769	11.5401	12.4313	11.4587	14.0158
ENSG00000070061	IKBKAP	chr9:111629796-111696396	protein_coding	6048	15.0486	16.2206	13.4762	13.7494
ENSG00000070081	NUCB2	chr11:17229699-17371521	protein_coding	8993	5.9837	5.492	6.3425	4.5275
ENSG00000070087	PFN2	chr3:149682690-149768575	protein_coding	3440	84.2931	88.3075	90.929	74.6646
ENSG00000070159	PTPN3	chr9:112137745-112260590	protein_coding	10071	0.2876	0.6298	0.3521	0.3615
ENSG00000070182	SPTB	chr14:65213001-65346601	protein_coding	14771	0.4504	0.584	0.4355	0.7264
ENSG00000070190	DAPP1	chr4:100737989-100791311	protein_coding	4548	0.0796	0	0.0334	0.0211
ENSG00000070193	FGF10	chr5:44303645-44389808	protein_coding	3011	3.2467	4.3535	5.333	5.0272
ENSG00000070214	SLC44A1	chr9:108006902-108201452	protein_coding	12613	6.4444	6.5776	7.5824	6.9423
ENSG00000070269	TMEM260	chr14:56955071-57117324	protein_coding	8077	4.0792	4.1254	3.7629	3.8905
ENSG00000070366	SMG6	chr17:1963132-2207065	protein_coding	11060	4.399	4.3279	3.7007	4.3484
ENSG00000070367	EXOC5	chr14:57670517-57735726	protein_coding	9269	14.0232	13.4762	13.3182	13.3332
ENSG00000070371	CLTCL1	chr22:19166985-19279239	protein_coding	9843	1.8668	2.1394	2.1769	2.5014
ENSG00000070388	FGF22	chr19:639878-643703	protein_coding	2110	0.0429	0	0	0
ENSG00000070404	FSTL3	chr19:676391-683385	protein_coding	3144	2.332	2.3671	3.1257	2.4072
ENSG00000070413	DGCR2	chr22:19023794-19109967	protein_coding	5596	14.404	17.6667	14.3656	11.1279
ENSG00000070423	RNF126	chr19:647525-663277	protein_coding	3677	3.2371	3.473	4.1053	4.1948
ENSG00000070444	MNT	chr17:2287353-2304412	protein_coding	8728	1.1771	1.0562	1.1085	0.8342
ENSG00000070476	ZXDC	chr3:126156443-126194762	protein_coding	7357	4.5769	5.3568	4.6545	4.3493
ENSG00000070495	JMJD6	chr17:74708918-74722866	protein_coding	5949	2.7844	2.6442	2.844	4.0099
ENSG00000070501	POLB	chr8:42195971-42229326	protein_coding	4106	4.3869	4.6137	4.2315	4.3631
ENSG00000070526	ST6GALNAC1	chr17:74620842-74639920	protein_coding	3448	0.0131	0	0.0147	0.0556
ENSG00000070540	WIPI1	chr17:66417088-66453654	protein_coding	3402	6.3723	6.3639	6.894	5.266
ENSG00000070601	FRMPD1	chr9:37650996-37746901	protein_coding	6724	17.2376	19.9604	24.5215	20.1179
ENSG00000070610	GBA2	chr9:35736862-35749983	protein_coding	5079	11.1207	11.9721	9.3052	11.2986
ENSG00000070614	NDST1	chr5:149865380-149937773	protein_coding	9043	13.9683	17.8811	17.9139	14.1643
ENSG00000070669	ASNS	chr7:97481429-97501854	protein_coding	4455	22.563	24.4315	22.8659	8.2792
ENSG00000070718	AP3M2	chr8:42010463-42029191	protein_coding	6276	6.2882	7.0206	7.1027	7.0982
ENSG00000070729	CNGB1	chr16:57917502-58005020	protein_coding	6039	0.015	0	0.0587	0
ENSG00000070731	ST6GALNAC2	chr17:74559791-74583038	protein_coding	7558	0.006	0	0.0268	0.0254
ENSG00000070748	CHAT	chr10:50817140-50901925	protein_coding	3100	0.0292	0.0273	0	0
ENSG00000070756	PABPC1	chr8:101698043-101735037	protein_coding	4752	183.708	167.433	184.446	195.536
ENSG00000070759	TESK2	chr1:45809554-45956872	protein_coding	3460	0.4447	0.4888	1.0541	0.4153
ENSG00000070761	C16orf80	chr16:58147495-58163354	protein_coding	2371	24.7383	22.0433	25.2742	25.6577
ENSG00000070770	CSNK2A2	chr16:58191810-58231824	protein_coding	6905	18.7128	18.2859	16.9022	19.6877
ENSG00000070778	PTPN21	chr14:88932121-89021077	protein_coding	7396	8.0162	8.1643	7.4791	8.4326
ENSG00000070785	EIF2B3	chr1:45316449-45452282	protein_coding	3043	7.5405	8.3654	7.6074	8.9411
ENSG00000070808	CAMK2A	chr5:149599053-149669854	protein_coding	6150	0.2723	0.3438	0.3542	0.2025
ENSG00000070814	TCOF1	chr5:149737201-149779871	protein_coding	11278	7.8895	7.7987	7.2538	7.6961
ENSG00000070831	CDC42	chr1:22379119-22419437	protein_coding	3470	69.6217	78.5508	80.6249	74.4884
ENSG00000070882	OSBPL3	chr7:24836157-25021253	protein_coding	8100	1.6315	1.6288	2.3827	2.3064
ENSG00000070886	EPHA8	chr1:22890056-22930087	protein_coding	5358	0.0169	0	0	0.0179
ENSG00000070915	SLC12A3	chr16:56899118-56949762	protein_coding	6180	0.0366	0	0	0
ENSG00000070950	RAD18	chr3:8817087-9005457	protein_coding	6983	3.9341	3.8755	3.968	3.3475
ENSG00000070961	ATP2B1	chr12:89981827-90103077	protein_coding	9491	22.2356	22.731	20.4734	37.0854
ENSG00000070985	TRPM5	chr11:2425744-2444275	protein_coding	3962	0	0.0213	0	0
ENSG00000071051	NCK2	chr2:106361353-106510730	protein_coding	2990	15.4543	16.4616	18.2969	21.7238
ENSG00000071054	MAP4K4	chr2:102313311-102511149	protein_coding	11918	51.596	42.5479	61.4977	72.8365
ENSG00000071073	MGAT4A	chr2:99235568-99347589	protein_coding	9630	0.5499	0.5972	0.5155	0.5571
ENSG00000071082	RPL31	chr2:101618176-101640494	protein_coding	5791	63.6004	87.4038	60.5395	67.1328
ENSG00000071127	WDR1	chr4:10075962-10118573	protein_coding	7827	22.3312	21.6856	24.7289	24.4065
ENSG00000071189	SNX13	chr7:17830384-17980124	protein_coding	16417	5.1855	5.2596	5.0757	5.1761
ENSG00000071203	MS4A12	chr11:60260250-60274903	protein_coding	1839	0.0246	0	0	0
ENSG00000071205	ARHGAP10	chr4:148653213-148993931	protein_coding	10759	3.3652	3.7259	3.5452	3.0097
ENSG00000071242	RPS6KA2	chr6:166822851-167319939	protein_coding	8243	2.586	3.2523	2.5994	1.7201
ENSG00000071243	ING3	chr7:120590802-120617270	protein_coding	5214	4.748	5.1417	3.9638	4.8691
ENSG00000071246	VASH1	chr14:77228531-77249354	protein_coding	6498	6.8535	7.4705	6.7665	7.5633
ENSG00000071282	LMCD1	chr3:8543392-8609805	protein_coding	2578	4.5469	5.9049	5.8554	5.2026
ENSG00000071462	WBSCR22	chr7:73097354-73119491	protein_coding	7944	4.4495	4.2158	4.4253	5.0771
ENSG00000071537	SEL1L	chr14:81937892-82000205	protein_coding	9559	12.9539	12.1207	12.628	12.3875
ENSG00000071539	TRIP13	chr5:892757-919472	protein_coding	3560	7.3989	9.241	9.5476	10.2261
ENSG00000071553	ATP6AP1	chrX:153656977-153664862	protein_coding	4884	8.3585	10.1644	8.7018	7.8266
ENSG00000071564	TCF3	chr19:1609290-1652604	protein_coding	6061	36.8053	39.4598	37.3917	40.1482
ENSG00000071575	TRIB2	chr2:12857014-12882860	protein_coding	4588	6.4217	7.4654	8.8437	12.7792
ENSG00000071626	DAZAP1	chr19:1407567-1435719	protein_coding	9272	10.6165	9.2853	11.0795	11.097
ENSG00000071655	MBD3	chr19:1576638-1592882	protein_coding	5173	6.0542	9.7927	6.5412	6.5004
ENSG00000071677	PRLH	chr2:238475216-238475818	protein_coding	264	0	0	0	0
ENSG00000071794	HLTF	chr3:148747913-148804341	protein_coding	6024	14.1694	14.6847	13.5131	12.7387
ENSG00000071859	FAM50A	chrX:153672472-153679002	protein_coding	2567	17.6307	14.1665	18.5492	17.3915
ENSG00000071889	FAM3A	chrX:153733349-153744566	protein_coding	6240	2.7198	3.185	2.2973	2.7482
ENSG00000071894	CPSF1	chr8:145618443-145634753	protein_coding	6096	13.5863	16.9669	13.395	15.4642
ENSG00000071909	MYO3B	chr2:171034654-171511681	protein_coding	8236	0.0659	0.0513	0.0492	0.0698
ENSG00000071967	CYBRD1	chr2:172378756-172414643	protein_coding	5176	11.5506	10.7674	10.0801	6.6632
ENSG00000071991	CDH19	chr18:64168319-64271375	protein_coding	6864	0	0	0	0
ENSG00000071994	PDCD2	chr6:170884382-170893780	protein_coding	6476	8.9663	10.1992	8.6355	10.1039
ENSG00000072041	SLC6A15	chr12:85253491-85307394	protein_coding	8556	0.1693	0.1285	0.2309	0.1008
ENSG00000072042	RDH11	chr14:68143517-68162531	protein_coding	5518	15.0587	14.4221	15.3306	14.7749
ENSG00000072062	PRKACA	chr19:14202499-14228896	protein_coding	6144	4.4566	4.6525	4.5098	4.3816
ENSG00000072071	LPHN1	chr19:14260749-14316999	protein_coding	6292	5.5889	7.0162	5.7724	5.1769
ENSG00000072080	SPP2	chr2:234959322-234985778	protein_coding	1265	0.9302	0.4011	0.8009	0.6059
ENSG00000072110	ACTN1	chr14:69340859-69446157	protein_coding	10626	10.6565	12.0258	13.2001	11.8829
ENSG00000072121	ZFYVE26	chr14:68194090-68283307	protein_coding	15706	4.3512	5.1046	4.4379	3.9465
ENSG00000072133	RPS6KA6	chrX:83318983-83442933	protein_coding	2890	0.8143	1.0242	1.0341	1.2597
ENSG00000072134	EPN2	chr17:19118927-19240028	protein_coding	9844	4.2435	4.9141	4.6312	4.9731
ENSG00000072135	PTPN18	chr2:131113579-131132982	protein_coding	5774	3.1196	3.1344	4.211	3.5507
ENSG00000072163	LIMS2	chr2:128395955-128439360	protein_coding	8487	0.5013	0.8171	1.0564	0.508
ENSG00000072182	ASIC4	chr2:220378891-220403494	protein_coding	5250	0.3103	0.3705	0.1447	0.3285
ENSG00000072195	SPEG	chr2:220299567-220363009	protein_coding	17910	3.7146	3.6029	2.6473	3.5197
ENSG00000072201	LNX1	chr4:54325467-54567572	protein_coding	5725	0.3162	0.2511	0.1947	0.2677
ENSG00000072210	ALDH3A2	chr17:19551448-19580911	protein_coding	6457	8.467	9.7184	7.9078	6.9882
ENSG00000072274	TFRC	chr3:195754053-195809060	protein_coding	7887	19.757	21.7887	21.2589	19.7022
ENSG00000072310	SREBF1	chr17:17713712-17740325	protein_coding	8039	3.2934	3.419	3.7366	3.742
ENSG00000072315	TRPC5	chrX:111017542-111326004	protein_coding	5839	0.031	0.0579	0	0.0656
ENSG00000072364	AFF4	chr5:132211070-132299326	protein_coding	11297	22.7031	24.0754	22.7247	22.8969
ENSG00000072401	UBE2D1	chr10:60094734-60130513	protein_coding	3486	8.335	8.0058	6.8877	8.9591
ENSG00000072415	MPP5	chr14:67707825-67802536	protein_coding	8743	5.7252	4.9332	4.8262	4.9638
ENSG00000072422	RHOBTB1	chr10:62629195-62761198	protein_coding	4841	10.9756	9.6258	12.4624	11.676
ENSG00000072444	ASAH2C	chr10:48001602-48055018	protein_coding	2055	0	0	0	0
ENSG00000072501	SMC1A	chrX:53401069-53449677	protein_coding	10674	30.2059	28.9429	30.6617	27.6619
ENSG00000072506	HSD17B10	chrX:53458205-53461320	protein_coding	1115	40.9555	44.6746	44.4312	41.5
ENSG00000072518	MARK2	chr11:63606399-63678491	protein_coding	6154	2.5299	2.9821	2.9879	3.2692
ENSG00000072571	HMMR	chr5:162887208-162918947	protein_coding	3932	19.0724	16.6474	21.1407	20.5883
ENSG00000072609	CHFR	chr12:133398772-133532890	protein_coding	9214	2.1219	2.8086	2.7158	2.6098
ENSG00000072657	TRHDE	chr12:72481045-73059422	protein_coding	6835	1.4634	1.46	0.541	0.5326
ENSG00000072682	P4HA2	chr5:131527530-131631008	protein_coding	8502	15.4267	17.4274	13.4949	9.0596
ENSG00000072694	FCGR2B	chr1:161551100-161648444	protein_coding	6996	0	0.0363	0.0145	0.0137
ENSG00000072736	NFATC3	chr16:68118653-68263162	protein_coding	8806	11.9852	12.6289	12.3675	12.3697
ENSG00000072756	TRNT1	chr3:3168599-3192563	protein_coding	5518	5.8808	6.0999	4.7552	6.1634
ENSG00000072778	ACADVL	chr17:7120443-7128592	protein_coding	4865	22.9034	23.4329	20.7931	19.4362
ENSG00000072786	STK10	chr5:171469076-171615390	protein_coding	9083	1.7539	1.7598	1.6396	1.3395
ENSG00000072803	FBXW11	chr5:171288552-171433877	protein_coding	5577	15.9462	16.7868	15.9314	16.2677
ENSG00000072818	ACAP1	chr17:7239847-7254797	protein_coding	7421	0.0488	0.0228	0.0137	0.0129
ENSG00000072832	CRMP1	chr4:5749810-5894785	protein_coding	5823	19.5784	21.0737	19.6949	22.6221
ENSG00000072840	EVC	chr4:5712923-5830772	protein_coding	7923	6.5976	6.3084	6.2528	5.6952
ENSG00000072849	DERL2	chr17:5374570-5390131	protein_coding	6386	8.058	8.0651	7.0359	6.8409
ENSG00000072858	SIDT1	chr3:113251142-113348425	protein_coding	8072	0.0505	0.0838	0.0628	0.1068
ENSG00000072864	NDE1	chr16:15737123-15820210	protein_coding	8035	4.8215	5.6731	5.1065	5.2223
ENSG00000072952	MRVI1	chr11:10594637-10715535	protein_coding	7702	0.6934	0.6808	1.2891	0.8707
ENSG00000072954	TMEM38A	chr19:16771937-16800840	protein_coding	3005	1.8374	1.8575	2.0228	2.678
ENSG00000072958	AP1M1	chr19:16308388-16346160	protein_coding	3813	6.7062	8.5835	7.6654	7.2863
ENSG00000073008	PVR	chr19:45147097-45166850	protein_coding	3519	10.7776	11.4155	10.9256	11.9243
ENSG00000073009	IKBKG	chrX:153769413-153796782	protein_coding	7462	0.934	0.884	0.8621	0.9372
ENSG00000073050	XRCC1	chr19:44047191-44084625	protein_coding	3459	22.0206	22.0045	25.4667	22.6835
ENSG00000073060	SCARB1	chr12:125261401-125367214	protein_coding	8240	2.9879	3.1919	2.7971	3.174
ENSG00000073067	CYP2W1	chr7:1022834-1029276	protein_coding	2773	0.1795	0.183	0.1461	0.0691
ENSG00000073111	MCM2	chr3:127317065-127341276	protein_coding	4899	23.1602	26.2395	26.4184	22.3715
ENSG00000073146	MOV10L1	chr22:50528307-50600119	protein_coding	6872	0.2371	0.1108	0.1106	0.0418
ENSG00000073150	PANX2	chr22:50609159-50618723	protein_coding	3102	0.1167	0.0545	0	0.0309
ENSG00000073169	SELO	chr22:50639407-50656045	protein_coding	2363	2.0302	2.3979	2.0365	2.9596
ENSG00000073282	TP63	chr3:189349204-189615068	protein_coding	7454	0.0789	0.0794	0.1291	0.2442
ENSG00000073331	ALPK1	chr4:113206664-113363776	protein_coding	12325	1.6561	2.1477	1.644	1.5546
ENSG00000073350	LLGL2	chr17:73521160-73571289	protein_coding	7909	0.0572	0.0214	0.064	0.0242
ENSG00000073417	PDE8A	chr15:85523670-85682376	protein_coding	7886	4.2297	4.6114	3.5714	4.1912
ENSG00000073464	CLCN4	chrX:10125023-10205700	protein_coding	6750	4.0363	4.4353	4.0149	3.7327
ENSG00000073536	NLE1	chr17:33455771-33469334	protein_coding	5463	3.9186	4.768	4.1633	4.2965
ENSG00000073578	SDHA	chr5:218355-256815	protein_coding	8383	10.8462	11.0064	10.8706	10.4911
ENSG00000073584	SMARCE1	chr17:38781213-38804760	protein_coding	11023	18.3611	17.3162	18.1013	18.1123
ENSG00000073598	FNDC8	chr17:33448597-33457751	protein_coding	1388	0	0	0.0365	0
ENSG00000073605	GSDMB	chr17:38060847-38076107	protein_coding	5917	1.7592	1.8724	1.6865	1.441
ENSG00000073614	KDM5A	chr12:389294-498620	protein_coding	12091	14.1041	14.9822	13.0754	12.2021
ENSG00000073670	ADAM11	chr17:42836398-42859214	protein_coding	4770	0.5408	0.5674	0.5841	0.4419
ENSG00000073711	PPP2R3A	chr3:135684514-135866733	protein_coding	7839	9.532	9.2349	9.176	7.6627
ENSG00000073712	FERMT2	chr14:53323985-53419153	protein_coding	8510	48.1671	44.0543	38.2086	44.9742
ENSG00000073734	ABCB11	chr2:169779447-169887832	protein_coding	5151	0	0	0	0.0186
ENSG00000073737	DHRS9	chr2:169921298-169952677	protein_coding	3751	0.0121	0	0.0135	0.0255
ENSG00000073754	CD5L	chr1:157800703-157868046	protein_coding	2456	0	0	0.0206	0
ENSG00000073756	PTGS2	chr1:186640922-186649559	protein_coding	5269	0	0	0.0385	0
ENSG00000073792	IGF2BP2	chr3:185361526-185542844	protein_coding	4735	30.5097	29.4345	31.9871	35.1444
ENSG00000073803	MAP3K13	chr3:185000728-185206885	protein_coding	12623	1.2298	1.0653	0.9631	0.8045
ENSG00000073849	ST6GAL1	chr3:186648273-186796341	protein_coding	9151	1.9288	2.3289	2.801	3.2978
ENSG00000073861	TBX21	chr17:45810609-45823485	protein_coding	2614	0	0	0	0.0733
ENSG00000073905	VDAC1P1	chrX:80184998-80185846	pseudogene	848	0	0	0	0
ENSG00000073910	FRY	chr13:32605436-32870794	protein_coding	16059	0.5439	0.6214	0.7791	0.4951
ENSG00000073921	PICALM	chr11:85668726-85780924	protein_coding	5833	26.6055	25.1117	26.348	26.1309
ENSG00000073969	NSF	chr17:44668034-44834830	protein_coding	5009	8.186	7.9354	8.2824	9.3335
ENSG00000074047	GLI2	chr2:121493198-121750229	protein_coding	7341	2.799	3.2026	4.3817	3.6541
ENSG00000074054	CLASP1	chr2:122095351-122407163	protein_coding	11099	16.4656	18.1881	16.2659	16.6763
ENSG00000074071	MRPS34	chr16:1821890-1823156	protein_coding	1097	31.9323	26.4428	29.1833	33.7099
ENSG00000074181	NOTCH3	chr19:15270443-15311792	protein_coding	8799	30.0949	43.9241	20.2298	17.3444
ENSG00000074201	CLNS1A	chr11:77225980-77348850	protein_coding	4592	34.8306	32.1744	34.2408	37.1568
ENSG00000074211	PPP2R2C	chr4:6322304-6565327	protein_coding	9198	0.0197	0.0092	0.022	0.0417
ENSG00000074219	TEAD2	chr19:49843851-49865714	protein_coding	2980	51.3937	53.0411	61.3471	61.1785
ENSG00000074266	EED	chr11:85955585-85989855	protein_coding	7016	2.8964	3.2666	2.4115	2.253
ENSG00000074276	CDHR2	chr5:175969511-176022975	protein_coding	5348	0.0085	0.0158	0	0
ENSG00000074317	SNCB	chr5:176047084-176057530	protein_coding	1979	0.0686	0.1282	0.0512	0.0484
ENSG00000074319	TSG101	chr11:18489882-18548779	protein_coding	3839	8.6178	9.6268	9.4607	10.4062
ENSG00000074356	C17orf85	chr17:3714459-3749545	protein_coding	5717	11.3679	11.5088	11.3768	12.6686
ENSG00000074370	ATP2A3	chr17:3827168-3867736	protein_coding	6866	0.5669	0.776	0.5091	0.6
ENSG00000074410	CA12	chr15:63613576-63674360	protein_coding	7313	0.0062	0	0.0762	0.0655
ENSG00000074416	MGLL	chr3:127407908-127542051	protein_coding	10056	0.2385	0.2355	0.0604	0.2382
ENSG00000074527	NTN4	chr12:96051582-96184930	protein_coding	4166	1.3036	2.1112	0.4499	0.4139
ENSG00000074582	BCS1L	chr2:219523486-219528166	protein_coding	3379	6.121	6.7326	6.8959	7.3999
ENSG00000074590	NUAK1	chr12:106457117-106533811	protein_coding	7008	6.2514	6.3114	6.6138	3.691
ENSG00000074603	DPP8	chr15:65734800-65810042	protein_coding	10211	5.4739	5.9633	5.5462	5.057
ENSG00000074621	SLC24A1	chr15:65903703-65953333	protein_coding	9084	1.3452	1.4151	1.3606	1.2128
ENSG00000074657	ZNF532	chr18:56529831-56653712	protein_coding	11951	16.9164	17.8397	18.6328	16.3772
ENSG00000074660	SCARF1	chr17:1537151-1549041	protein_coding	4957	0	0.0512	0.0102	0.0193
ENSG00000074695	LMAN1	chr18:56995054-57027194	protein_coding	6767	24.6187	22.5705	26.6263	25.7663
ENSG00000074696	PTPLAD1	chr15:65822755-65870687	protein_coding	4469	55.0712	51.8324	63.7582	71.4927
ENSG00000074706	IPCEF1	chr6:154475630-154677926	protein_coding	8474	0.0961	0.0599	0.1076	0.1017
ENSG00000074755	ZZEF1	chr17:3907738-4046314	protein_coding	15878	3.1753	4.5806	3.0499	3.0892
ENSG00000074771	NOX3	chr6:155716503-155777037	protein_coding	2042	0.0665	0	0	0
ENSG00000074800	ENO1	chr1:8921060-8939308	protein_coding	3958	372.172	456.592	444.826	381.225
ENSG00000074803	SLC12A1	chr15:48483860-48596275	protein_coding	12476	0.0109	0	0.0122	0.0154
ENSG00000074842	C19orf10	chr19:4641385-4670382	protein_coding	1678	11.0043	12.2975	11.4412	8.3927
ENSG00000074855	ANO8	chr19:17434031-17445638	protein_coding	4979	2.3179	2.1402	2.6248	2.0973
ENSG00000074935	TUBE1	chr6:112391979-112408732	protein_coding	6973	4.6731	3.9781	5.4266	4.6988
ENSG00000074964	ARHGEF10L	chr1:17866329-18024369	protein_coding	7847	1.811	2.468	2.098	1.3674
ENSG00000074966	TXK	chr4:48068409-48136273	protein_coding	3472	0	0	0	0.0828
ENSG00000075035	WSCD2	chr12:108523247-108644314	protein_coding	6557	0.0621	0.0774	0.0077	0.0438
ENSG00000075043	KCNQ2	chr20:62037541-62103993	protein_coding	4029	1.8984	2.4769	1.2321	1.1414
ENSG00000075073	TACR2	chr10:71163658-71176623	protein_coding	2871	0	0.0295	0.0176	0
ENSG00000075089	ACTR6	chr12:100592899-100635643	protein_coding	3813	4.4273	5.1235	4.5169	4.5225
ENSG00000075131	TIPIN	chr15:66628543-66679084	protein_coding	2755	4.3862	3.7758	3.3464	4.6945
ENSG00000075142	SRI	chr7:87834432-87856308	protein_coding	4237	12.5082	12.2555	11.2262	12.5943
ENSG00000075151	EIF4G3	chr1:21132962-21503377	protein_coding	8353	23.6449	23.1853	24.706	26.2072
ENSG00000075188	NUP37	chr12:102467966-102513902	protein_coding	2406	6.4332	5.9403	6.1266	5.0569
ENSG00000075213	SEMA3A	chr7:83585092-84122040	protein_coding	9371	7.6163	7.3461	8.5948	7.0541
ENSG00000075218	GTSE1	chr22:46692637-46726707	protein_coding	4242	8.4712	10.4866	10.4128	10.4339
ENSG00000075223	SEMA3C	chr7:80371853-80551675	protein_coding	6268	22.8168	22.6673	25.3518	26.5184
ENSG00000075234	TTC38	chr22:46663857-46689905	protein_coding	3578	6.4763	6.1927	6.2293	5.5157
ENSG00000075239	ACAT1	chr11:107992242-108018503	protein_coding	5584	10.9093	9.2537	9.8698	10.9631
ENSG00000075240	GRAMD4	chr22:46971908-47075688	protein_coding	4886	2.5287	3.254	2.8821	2.9215
ENSG00000075275	CELSR1	chr22:46756730-46933067	protein_coding	12817	0.8404	1.0095	0.8339	0.5755
ENSG00000075290	WNT8B	chr10:102222797-102243501	protein_coding	2112	0	0	0.1439	0.0454
ENSG00000075292	ZNF638	chr2:71503690-71662199	protein_coding	14127	27.8205	27.1845	23.2855	26.1902
ENSG00000075303	SLC25A40	chr7:87462882-87505672	protein_coding	5081	3.6609	3.8782	4.1573	3.771
ENSG00000075336	TIMM21	chr18:71815745-71826197	protein_coding	3641	5.7676	6.3643	5.6067	7.078
ENSG00000075340	ADD2	chr2:70834749-70995357	protein_coding	12673	0.3785	0.4805	1.0113	0.8164
ENSG00000075388	FGF4	chr11:69587796-69590171	protein_coding	1220	0	0	0	0
ENSG00000075391	RASAL2	chr1:178062863-178448644	protein_coding	11818	4.8406	5.0379	4.642	4.9693
ENSG00000075399	VPS9D1	chr16:89773541-89787394	protein_coding	3428	2.9574	3.6266	2.7781	2.5432
ENSG00000075407	ZNF37A	chr10:38383263-38414472	protein_coding	9626	9.281	8.7681	8.1829	8.9274
ENSG00000075413	MARK3	chr14:103851728-103970168	protein_coding	8891	12.8785	11.8709	11.9815	13.2427
ENSG00000075415	SLC25A3	chr12:98987368-98995946	protein_coding	4685	59.3619	76.5017	60.0618	62.9003
ENSG00000075420	FNDC3B	chr3:171757417-172119455	protein_coding	13299	12.2682	12.801	12.8857	11.6196
ENSG00000075426	FOSL2	chr2:28615314-28640179	protein_coding	7157	11.6165	10.9539	13.8086	8.9819
ENSG00000075429	CACNG5	chr17:64831234-64881603	protein_coding	1632	0	0	0	0
ENSG00000075461	CACNG4	chr17:64961025-65029514	protein_coding	3380	3.6688	3.9283	5.2603	6.7458
ENSG00000075539	FRYL	chr4:48499377-48782339	protein_coding	18170	9.0367	9.1226	8.4639	7.6188
ENSG00000075568	TMEM131	chr2:98372798-98612388	protein_coding	12991	11.1273	11.9653	13.199	15.2874
ENSG00000075618	FSCN1	chr7:5632438-5646286	protein_coding	3707	27.1768	31.848	34.2985	40.652
ENSG00000075624	ACTB	chr7:5566781-5603415	protein_coding	3256	646.345	727.214	818.261	856.013
ENSG00000075643	MOCOS	chr18:33767481-33852120	protein_coding	6281	0.1153	0.0539	0.2097	0
ENSG00000075651	PLD1	chr3:171318194-171528740	protein_coding	9953	22.0583	21.5314	20.5613	14.5441
ENSG00000075673	ATP12A	chr13:25254548-25285921	protein_coding	3732	0	0	0	0
ENSG00000075702	WDR62	chr19:36545782-36596008	protein_coding	9775	2.1622	2.3879	2.389	2.8422
ENSG00000075711	DLG1	chr3:196769430-197026171	protein_coding	11001	12.5929	11.3699	15.3011	16.5636
ENSG00000075785	RAB7A	chr3:128444964-128533639	protein_coding	2717	37.4291	29.6635	41.4638	43.1234
ENSG00000075790	BCAP29	chr7:107220421-107269615	protein_coding	8409	3.9451	3.7513	3.5963	2.9735
ENSG00000075826	SEC31B	chr10:102246398-102289628	protein_coding	8360	1.4996	1.2949	1.127	1.2376
ENSG00000075856	SART3	chr12:108916356-108955176	protein_coding	7270	18.1592	16.6582	16.0605	17.8427
ENSG00000075884	ARHGAP15	chr2:143848930-144525921	protein_coding	7743	0.7365	0.5243	0.929	1.3363
ENSG00000075886	TUBA3D	chr2:132233665-132240507	protein_coding	1598	0	0	0	0
ENSG00000075891	PAX2	chr10:102495359-102589698	protein_coding	6243	0.1522	0.0813	0.0974	0.4297
ENSG00000075914	EXOSC7	chr3:45016732-45077558	protein_coding	4442	4.0958	5.3309	4.0825	4.2703
ENSG00000075945	KIFAP3	chr1:169890466-170054349	protein_coding	5014	6.3365	6.1733	4.4654	5.7703
ENSG00000075975	MKRN2	chr3:12598512-12625212	protein_coding	2848	13.0466	13.9268	13.3575	14.4982
ENSG00000076003	MCM6	chr2:136597195-136633996	protein_coding	4118	15.0018	16.183	16.1757	16.2385
ENSG00000076043	REXO2	chr11:114310107-114321001	protein_coding	3699	4.7106	4.3211	5.7105	6.0087
ENSG00000076053	RBM7	chr11:114270751-114284925	protein_coding	7885	2.6575	2.6063	2.6339	2.5515
ENSG00000076067	RBMS2	chr12:56915712-56984745	protein_coding	3570	12.6393	11.8209	13.3378	11.8344
ENSG00000076108	BAZ2A	chr12:56989379-57030600	protein_coding	10918	6.7444	6.4679	5.8598	6.4757
ENSG00000076201	PTPN23	chr3:47422500-47454931	protein_coding	5981	1.8539	1.9513	1.0671	1.4416
ENSG00000076242	MLH1	chr3:37034822-37107380	protein_coding	3748	17.2676	19.1345	17.5563	16.1545
ENSG00000076248	UNG	chr12:109535378-109548797	protein_coding	2567	8.9388	10.3119	9.3141	10.002
ENSG00000076258	FMO4	chr1:171283346-171311223	protein_coding	2517	0.8631	0.7728	0.7044	0.4567
ENSG00000076321	KLHL20	chr1:173684079-173755840	protein_coding	4254	8.075	7.1768	6.8945	7.6119
ENSG00000076344	RGS11	chr16:318299-325980	protein_coding	4798	0.2358	0.1586	0.2006	0.1597
ENSG00000076351	SLC46A1	chr17:26721660-26734215	protein_coding	7951	1.1213	1.1062	1.2551	0.988
ENSG00000076356	PLXNA2	chr1:208195586-208417665	protein_coding	13781	20.2924	24.7802	15.3131	17.5949
ENSG00000076382	SPAG5	chr17:26904587-26926297	protein_coding	5467	20.4228	24.9056	25.2859	23.6571
ENSG00000076513	ANKRD13A	chr12:110436990-110477568	protein_coding	7350	7.4383	7.6862	7.1262	7.2862
ENSG00000076554	TPD52	chr8:80870570-81143467	protein_coding	8341	0.2116	0.2129	0.2976	0.4135
ENSG00000076555	ACACB	chr12:109554399-109706031	protein_coding	14159	1.2882	1.7142	1.6063	1.5292
ENSG00000076604	TRAF4	chr17:27071001-27077974	protein_coding	4594	10.9648	12.5733	11.5336	16.9124
ENSG00000076641	PAG1	chr8:81880044-82024303	protein_coding	11023	7.0373	7.3116	5.225	3.9023
ENSG00000076650	GPATCH1	chr19:33571785-33621448	protein_coding	4488	4.5682	4.6732	3.4312	3.3941
ENSG00000076662	ICAM3	chr19:10444451-10450499	protein_coding	2950	0.5063	0.8027	0.5323	0.6495
ENSG00000076685	NT5C2	chr10:104845939-104953056	protein_coding	7320	8.1922	7.4404	8.3041	8.2584
ENSG00000076706	MCAM	chr11:119179240-119192231	protein_coding	7420	15.9135	16.3329	11.8446	15.6486
ENSG00000076716	GPC4	chrX:132434130-132549518	protein_coding	5057	9.4329	12.2416	8.0135	6.498
ENSG00000076770	MBNL3	chrX:131503344-131623996	protein_coding	12199	8.3215	8.1805	7.3954	7.3114
ENSG00000076826	CAMSAP3	chr19:7660787-7683190	protein_coding	4845	0.0654	0.0873	0.1882	0.1582
ENSG00000076864	RAP1GAP	chr1:21922707-21995801	protein_coding	5650	1.8344	1.901	0.78	0.6952
ENSG00000076924	XAB2	chr19:7684410-7694451	protein_coding	4673	8.0482	9.1574	8.5961	9.1231
ENSG00000076928	ARHGEF1	chr19:42387227-42434302	protein_coding	8630	2.6536	2.7047	2.9818	2.4755
ENSG00000076944	STXBP2	chr19:7701766-7712759	protein_coding	5301	0.111	0.0798	0.0382	0.1446
ENSG00000076984	MAP2K7	chr19:7968727-7979363	protein_coding	5145	2.9468	3.156	2.8257	3.6496
ENSG00000077009	NMRK2	chr19:3933100-3942414	protein_coding	1141	0	0.2224	0.222	0.2519
ENSG00000077044	DGKD	chr2:234263152-234380750	protein_coding	9441	5.6662	6.2884	4.2172	6.1392
ENSG00000077063	CTTNBP2	chr7:117350704-117514193	protein_coding	7035	0.1222	0.0481	0.0288	0.0681
ENSG00000077080	ACTL6B	chr7:100240719-100254084	protein_coding	2389	0.0568	0.0708	0.0212	0
ENSG00000077092	RARB	chr3:25215822-25639423	protein_coding	3697	0.9181	0.7549	1.9319	2.2804
ENSG00000077097	TOP2B	chr3:25639474-25706398	protein_coding	5965	89.4539	91.2768	79.8169	85.2023
ENSG00000077147	TM9SF3	chr10:98277865-98347209	protein_coding	7095	25.1901	25.4129	22.204	22.9548
ENSG00000077150	NFKB2	chr10:104153866-104162281	protein_coding	4479	1.6066	1.5672	2.1601	0.9411
ENSG00000077152	UBE2T	chr1:202300784-202311108	protein_coding	1065	21.5029	23.6639	28.6808	25.9071
ENSG00000077157	PPP1R12B	chr1:202317826-202561834	protein_coding	18537	2.273	2.4727	2.1615	2.6926
ENSG00000077232	DNAJC10	chr2:183580998-183659191	protein_coding	21586	6.313	6.5663	6.4486	6.3421
ENSG00000077235	GTF3C1	chr16:27470875-27561234	protein_coding	11562	23.5254	27.51	24.8281	25.4462
ENSG00000077238	IL4R	chr16:27324988-27376099	protein_coding	6091	7.2594	7.5115	8.4079	9.5787
ENSG00000077254	USP33	chr1:78161671-78225537	protein_coding	6918	13.9869	14.2418	11.8547	11.5079
ENSG00000077264	PAK3	chrX:110187512-110470589	protein_coding	10312	2.7299	3.0098	2.0631	1.5608
ENSG00000077274	CAPN6	chrX:110488330-110513751	protein_coding	3568	32.6497	29.2489	38.9426	36.8657
ENSG00000077279	DCX	chrX:110537006-110655603	protein_coding	10139	11.9852	12.3365	8.1936	10.441
ENSG00000077312	SNRPA	chr19:41256541-41271294	protein_coding	2361	38.9898	38.1481	46.1067	47.4751
ENSG00000077327	SPAG6	chr10:22634398-22743153	protein_coding	4006	0.3615	0.3378	0.215	0.574
ENSG00000077348	EXOSC5	chr19:41892278-41903384	protein_coding	1488	4.1973	4.0921	6.5021	6.3739
ENSG00000077380	DYNC1I2	chr2:172543918-172604930	protein_coding	4695	43.8121	41.5018	40.2436	39.0963
ENSG00000077420	APBB1IP	chr10:26727131-26856732	protein_coding	3981	0	0	0.0127	0
ENSG00000077454	LRCH4	chr7:100169854-100183776	protein_coding	8954	4.2609	3.9386	3.9035	4.6114
ENSG00000077458	FAM76B	chr11:95502105-95523573	protein_coding	6042	7.7453	6.9566	7.0005	6.723
ENSG00000077463	SIRT6	chr19:4174105-4182601	protein_coding	2787	2.0948	2.1545	2.6355	1.7187
ENSG00000077498	TYR	chr11:88910619-89028927	protein_coding	3016	0.045	0	0.0672	0.0635
ENSG00000077514	POLD3	chr11:74204895-74380162	protein_coding	5508	13.2537	15.1392	14.6687	10.2099
ENSG00000077522	ACTN2	chr1:236849753-236927931	protein_coding	5419	11.7008	11.9857	5.6741	9.582
ENSG00000077549	CAPZB	chr1:19665266-19812066	protein_coding	3476	35.1023	33.2833	43.7185	43.2709
ENSG00000077585	GPR137B	chr1:236305831-236385165	protein_coding	2279	1.5688	1.5215	2.1782	2.0178
ENSG00000077616	NAALAD2	chr11:89864682-89926062	protein_coding	7254	0.2496	0.408	0.3492	0.2245
ENSG00000077684	JADE1	chr4:129730778-129796379	protein_coding	9110	7.1787	7.1203	6.9894	6.5936
ENSG00000077713	SLC25A43	chrX:118533022-118588441	protein_coding	3115	4.1844	3.638	4.2443	4.1212
ENSG00000077721	UBE2A	chrX:118708500-118718381	protein_coding	3251	14.4085	14.1775	15.2698	16.3256
ENSG00000077782	FGFR1	chr8:38268655-38326352	protein_coding	12698	12.3071	13.5734	11.848	11.2793
ENSG00000077800	FKBP6	chr7:72742166-72772634	protein_coding	2457	0	0	0	0
ENSG00000077809	GTF2I	chr7:74071993-74175026	protein_coding	10442	28.1855	31.4731	26.7926	29.4141
ENSG00000077935	SMC1B	chr22:45739943-45809500	protein_coding	4253	0.0106	0	0.0238	0
ENSG00000077942	FBLN1	chr22:45898117-45997015	protein_coding	7136	44.8902	46.0303	55.1627	40.9201
ENSG00000077943	ITGA8	chr10:15555947-15762124	protein_coding	7528	6.6312	6.2574	1.5476	0.8399
ENSG00000077984	CST7	chr20:24929865-24940564	protein_coding	930	0	0	0	0
ENSG00000078018	MAP2	chr2:210288781-210598842	protein_coding	11559	1.3626	1.3243	1.7748	1.8897
ENSG00000078043	PIAS2	chr18:44388352-44500123	protein_coding	9236	7.3601	6.5378	7.5577	8.4226
ENSG00000078053	AMPH	chr7:38423304-38671167	protein_coding	5636	2.5777	2.731	1.7077	1.6828
ENSG00000078061	ARAF	chrX:47420515-47431307	protein_coding	3497	6.4969	7.6179	7.8945	7.5886
ENSG00000078070	MCCC1	chr3:182733005-182833863	protein_coding	4321	5.7921	5.0496	5.7443	5.9641
ENSG00000078081	LAMP3	chr3:182840000-182881627	protein_coding	3816	0	0	0.1327	0.0251
ENSG00000078098	FAP	chr2:163027193-163101661	protein_coding	7003	0.0517	0.0121	0.0796	0.1094
ENSG00000078114	NEBL	chr10:21068901-21463116	protein_coding	13718	0.1485	0.1171	0.2326	0.44
ENSG00000078124	ACER3	chr11:76571910-76737841	protein_coding	8442	3.0987	2.9853	3.6062	2.7349
ENSG00000078140	UBE2K	chr4:39699663-39784412	protein_coding	5245	12.529	13.512	12.0819	13.5895
ENSG00000078142	PIK3C3	chr18:39535170-39667794	protein_coding	15176	5.5976	6.247	5.1837	5.0313
ENSG00000078177	N4BP2	chr4:40058445-40159872	protein_coding	9835	20.4961	19.1671	19.1856	19.7255
ENSG00000078237	C12orf5	chr12:4430370-4462338	protein_coding	1602	4.8592	5.3319	5.1541	6.1596
ENSG00000078246	TULP3	chr12:2986388-3050306	protein_coding	3181	24.7987	21.6412	31.2116	29.6352
ENSG00000078269	SYNJ2	chr6:158402887-158520208	protein_coding	9985	8.5983	9.2066	8.183	7.1864
ENSG00000078295	ADCY2	chr5:7396320-7830194	protein_coding	17784	0.2825	0.2711	0.7377	0.4956
ENSG00000078304	PPP2R5C	chr14:102228134-102394326	protein_coding	14289	8.1115	8.357	8.5365	7.7505
ENSG00000078319	PMS2P1	chr7:99918614-99939531	pseudogene	1114	3.5345	5.3141	2.8192	4.2999
ENSG00000078328	RBFOX1	chr16:6069094-7763340	protein_coding	8213	1.4603	1.2974	1.141	2.5546
ENSG00000078369	GNB1	chr1:1716728-1822495	protein_coding	6351	55.0137	48.6704	62.4037	62.8878
ENSG00000078399	HOXA9	chr7:27202053-27210117	protein_coding	2550	5.289	4.7426	9.7735	8.9416
ENSG00000078401	EDN1	chr6:12290595-12297427	protein_coding	2033	0.0668	0.0832	0.299	0.0942
ENSG00000078403	MLLT10	chr10:21823093-22032559	protein_coding	6844	10.726	10.2439	12.2271	12.9622
ENSG00000078487	ZCWPW1	chr7:99998448-100026615	protein_coding	3318	1.7187	1.2234	1.5877	1.7035
ENSG00000078549	ADCYAP1R1	chr7:31092075-31151089	protein_coding	6828	11.0096	12.101	6.7659	6.4261
ENSG00000078579	FGF20	chr8:16849677-16859690	protein_coding	1688	0.0804	0	0	0
ENSG00000078589	P2RY10	chrX:78200828-78217451	protein_coding	1803	0	0	0	0.0531
ENSG00000078596	ITM2A	chrX:78615880-78623164	protein_coding	2051	23.1476	19.2975	9.9285	5.9322
ENSG00000078618	NRD1	chr1:52254862-52344477	protein_coding	6619	23.7128	23.4585	24.2294	22.5937
ENSG00000078668	VDAC3	chr8:42249141-42263415	protein_coding	3144	36.8801	39.165	38.0719	42.9648
ENSG00000078674	PCM1	chr8:17780348-17885478	protein_coding	12470	36.4097	36.2765	35.938	34.1416
ENSG00000078687	TNRC6C	chr17:76000248-76104916	protein_coding	11058	4.7599	5.0247	4.0083	4.4184
ENSG00000078699	CBFA2T2	chr20:32077880-32237842	protein_coding	9457	4.4985	5.3566	5.0778	4.275
ENSG00000078725	BRINP1	chr9:121915735-122131745	protein_coding	3905	0.5099	0.2382	0.7394	0.3189
ENSG00000078747	ITCH	chr20:32951040-33099198	protein_coding	6664	17.1551	17.5512	16.0616	19.4365
ENSG00000078795	PKD2L2	chr5:137223656-137278436	protein_coding	4654	0	0	0.0109	0
ENSG00000078804	TP53INP2	chr20:33292093-33301243	protein_coding	4228	0.8992	1.2802	1.3059	0.9517
ENSG00000078808	SDF4	chr1:1152287-1167411	protein_coding	4709	9.2361	9.3209	9.52	9.2568
ENSG00000078814	MYH7B	chr20:33563205-33590240	protein_coding	7929	1.4041	1.3546	0.7027	2.5252
ENSG00000078898	BPIFB2	chr20:31595405-31611515	protein_coding	1898	0	0	0	0
ENSG00000078900	TP73	chr1:3569083-3652765	protein_coding	6763	0.174	0.2251	0.2846	0.1558
ENSG00000078902	TOLLIP	chr11:1295600-1330884	protein_coding	5983	1.7247	2.4312	1.9642	2.1297
ENSG00000078967	UBE2D4	chr7:43966036-43995735	protein_coding	4713	2.8232	2.4583	3.0847	2.9881
ENSG00000079101	CLUL1	chr18:596987-650334	protein_coding	3846	0.0235	0.1539	0	0.0498
ENSG00000079102	RUNX1T1	chr8:92967202-93115514	protein_coding	13527	6.7885	7.0585	2.7149	2.7267
ENSG00000079112	CDH17	chr8:95139398-95229531	protein_coding	3901	0	0	0	0
ENSG00000079134	THOC1	chr18:214519-268050	protein_coding	8099	9.8295	9.9304	7.8056	9.2857
ENSG00000079150	FKBP7	chr2:179328390-179343327	protein_coding	3080	21.9237	22.8725	22.2521	21.6488
ENSG00000079156	OSBPL6	chr2:179059207-179264160	protein_coding	8028	2.582	2.5283	4.0635	3.0789
ENSG00000079215	SLC1A3	chr5:36606456-36688436	protein_coding	6265	3.9443	3.9282	2.5873	2.9054
ENSG00000079246	XRCC5	chr2:216972186-217071026	protein_coding	5463	131.773	129.991	142.072	136.294
ENSG00000079257	LXN	chr3:158363610-158390482	protein_coding	1504	2.0763	2.5866	3.4691	2.5479
ENSG00000079263	SP140	chr2:231067825-231223762	protein_coding	5829	0.0155	0	0.0174	0.0329
ENSG00000079277	MKNK1	chr1:47023089-47082515	protein_coding	8060	3.7341	3.3681	3.4943	3.6015
ENSG00000079308	TNS1	chr2:218664511-218867718	protein_coding	15595	4.3909	5.2386	3.7192	2.101
ENSG00000079313	REXO1	chr19:1815247-1848452	protein_coding	5186	3.4733	4.3704	3.2624	3.7685
ENSG00000079332	SAR1A	chr10:71907044-71930279	protein_coding	6914	27.7675	23.3505	23.0417	23.9991
ENSG00000079335	CDC14A	chr1:100810583-100985833	protein_coding	5729	2.283	1.6976	2.2989	2.1572
ENSG00000079337	RAPGEF3	chr12:48128454-48164823	protein_coding	11995	0.1056	0.0564	0.076	0.0958
ENSG00000079385	CEACAM1	chr19:43011455-43065386	protein_coding	5524	0	0	0	0.0347
ENSG00000079387	SENP1	chr12:48436680-48500091	protein_coding	6366	10.9413	10.0566	11.2116	10.7902
ENSG00000079393	DUSP13	chr10:76854191-76868979	protein_coding	2349	0.7707	0.54	1.4664	0.4894
ENSG00000079432	CIC	chr19:42772688-42799949	protein_coding	9494	4.5191	4.4895	3.9056	4.107
ENSG00000079435	LIPE	chr19:42905658-42931578	protein_coding	5206	1.304	1.3808	1.1871	0.9201
ENSG00000079459	FDFT1	chr8:11653081-11696818	protein_coding	5202	34.1393	34.6932	41.1026	41.9158
ENSG00000079462	PAFAH1B3	chr19:42801184-42807698	protein_coding	1419	25.1327	26.5811	34.2342	30.0437
ENSG00000079482	OPHN1	chrX:67262185-67653755	protein_coding	8224	5.6628	5.6045	5.0446	5.4751
ENSG00000079557	AFM	chr4:74347399-74369691	protein_coding	2217	0	0	0	0
ENSG00000079616	KIF22	chr16:29802039-29816706	protein_coding	4312	26.8274	30.9491	31.9532	28.9718
ENSG00000079689	SCGN	chr6:25652463-25702011	protein_coding	1447	0.0313	0	0	0
ENSG00000079691	LRRC16A	chr6:25279305-25620758	protein_coding	6881	1.2299	1.1184	2.0318	1.1695
ENSG00000079739	PGM1	chr1:64058946-64125916	protein_coding	4090	21.3122	23.779	24.1138	24.1731
ENSG00000079785	DDX1	chr2:15731301-15771235	protein_coding	3817	44.2621	49.3864	43.6614	41.7143
ENSG00000079805	DNM2	chr19:10828754-10944164	protein_coding	13443	6.2216	6.9139	6.3983	6.642
ENSG00000079819	EPB41L2	chr6:131160486-131384462	protein_coding	10247	24.0976	22.391	20.8662	24.8318
ENSG00000079841	RIMS1	chr6:72596405-73112845	protein_coding	12800	0.0248	0.0462	0.1623	0.1721
ENSG00000079931	MOXD1	chr6:132617193-132722684	protein_coding	5293	29.4395	28.7601	23.2365	25.1226
ENSG00000079950	STX7	chr6:132767005-132834337	protein_coding	16387	3.7147	3.5352	3.1592	3.4317
ENSG00000079974	RABL2B	chr22:51205928-51222091	protein_coding	5870	2.0123	2.7374	2.5112	2.7582
ENSG00000079999	KEAP1	chr19:10596795-10614417	protein_coding	3761	10.2285	12.7047	10.9499	9.7815
ENSG00000080007	DDX43	chr6:74104470-74127292	protein_coding	2807	0	0	0.018	0
ENSG00000080031	PTPRH	chr19:55692615-55720874	protein_coding	4344	0	0	0.0583	0.0662
ENSG00000080166	DCT	chr13:95089557-95131936	protein_coding	7047	0.0128	0	0.0072	0.0544
ENSG00000080189	SLC35C2	chr20:44978166-44993043	protein_coding	4106	5.0483	5.3552	6.0204	5.1798
ENSG00000080200	CRYBG3	chr3:97595818-97663810	protein_coding	5003	8.6934	8.8577	8.0595	10.1298
ENSG00000080224	EPHA6	chr3:96533424-97471304	protein_coding	6303	0.0072	0.0268	0.0241	0.0152
ENSG00000080293	SCTR	chr2:120197418-120282070	protein_coding	2900	0	0.0292	0.0524	0
ENSG00000080298	RFX3	chr9:3218296-3526004	protein_coding	11037	4.0555	4.0994	3.5799	3.5328
ENSG00000080345	RIF1	chr2:152266396-152364527	protein_coding	18166	17.883	18.1376	14.8067	13.8857
ENSG00000080371	RAB21	chr12:72148653-72184699	protein_coding	6670	5.8897	6.0734	5.9617	5.2282
ENSG00000080493	SLC4A4	chr4:72053002-72437804	protein_coding	8361	1.9595	1.4464	0.618	0.6417
ENSG00000080503	SMARCA2	chr9:2015341-2193624	protein_coding	7132	16.5498	15.4034	10.1495	8.7044
ENSG00000080511	RDH8	chr19:10123924-10132955	protein_coding	2001	0.0226	0	0.0253	0
ENSG00000080546	SESN1	chr6:109307639-109416022	protein_coding	5121	4.8696	4.5085	3.8676	4.1718
ENSG00000080561	MID2	chrX:107068984-107170423	protein_coding	3097	0.8914	1.0104	2.1263	1.0518
ENSG00000080572	PIH1D3	chrX:106449861-106487473	protein_coding	1931	0	0	0	0.0496
ENSG00000080573	COL5A3	chr19:10070236-10121147	protein_coding	6750	8.2001	8.5949	3.7297	2.2141
ENSG00000080603	SRCAP	chr16:30709529-30755602	protein_coding	12746	3.5046	4.8303	2.9409	3.2771
ENSG00000080608	KIAA0020	chr9:2720468-2844241	protein_coding	2707	46.8965	39.8329	36.2651	55.0324
ENSG00000080618	CPB2	chr13:46627320-46679211	protein_coding	1767	0	0	0	0
ENSG00000080644	CHRNA3	chr15:78885393-78913637	protein_coding	4765	0.0855	0.0532	0.1488	0.0402
ENSG00000080709	KCNN2	chr5:113696641-113832337	protein_coding	3995	0.0906	0.2752	0.1395	0.3597
ENSG00000080802	CNOT4	chr7:135046546-135194875	protein_coding	6999	7.7984	7.0445	7.2737	8.3223
ENSG00000080815	PSEN1	chr14:73603125-73690399	protein_coding	9947	6.8931	7.856	6.992	6.6745
ENSG00000080819	CPOX	chr3:98239975-98312567	protein_coding	3666	4.2962	4.9367	4.8638	4.9391
ENSG00000080822	CLDND1	chr3:98216755-98241910	protein_coding	5217	10.0631	8.0729	10.6612	10.8161
ENSG00000080823	MOK	chr14:102690836-102771537	protein_coding	10996	0.9014	0.8537	1.078	0.7667
ENSG00000080824	HSP90AA1	chr14:102547074-102606036	protein_coding	5248	108.825	108.179	104.611	119.643
ENSG00000080839	RBL1	chr20:35624751-35724398	protein_coding	5954	9.1519	8.3662	8.5163	6.4684
ENSG00000080845	DLGAP4	chr20:34894257-35157040	protein_coding	8789	4.8816	5.0517	4.9912	6.224
ENSG00000080854	IGSF9B	chr11:133778458-133826880	protein_coding	8781	0.1185	0.1541	0.1211	0.0327
ENSG00000080910	CFHR2	chr1:196788897-196928356	protein_coding	1222	0	0	0	0
ENSG00000080947	CROCCP3	chr1:16793930-16825752	pseudogene	6813	1.6807	2.5571	1.8662	1.7858
ENSG00000080986	NDC80	chr18:2571509-2616634	protein_coding	3600	19.4861	17.0316	20.0651	17.3243
ENSG00000081014	AP4E1	chr15:51200868-51298097	protein_coding	7359	2.7921	3.3212	2.5331	2.5126
ENSG00000081019	RSBN1	chr1:114304453-114355098	protein_coding	6819	8.8007	7.801	8.424	10.1717
ENSG00000081026	MAGI3	chr1:113933370-114228545	protein_coding	8180	4.5535	5.128	4.7992	3.8883
ENSG00000081041	CXCL2	chr4:74962751-74965010	protein_coding	1500	0	0	0	0
ENSG00000081051	AFP	chr4:74296854-74321891	protein_coding	3259	0	0	0.0155	0
ENSG00000081052	COL4A4	chr2:227867426-228028829	protein_coding	9895	0.032	0.0256	0.0256	0.029
ENSG00000081059	TCF7	chr5:133450401-133487556	protein_coding	10063	0.4318	0.3278	0.4279	0.4951
ENSG00000081087	OSTM1	chr6:108362612-108487058	protein_coding	5325	3.8926	3.1287	3.0346	4.6057
ENSG00000081138	CDH7	chr18:63417487-63548638	protein_coding	5593	5.8262	7.0161	8.124	6.8516
ENSG00000081148	IMPG2	chr3:100941389-101039404	protein_coding	8337	0.2497	0.1927	0.1823	0.1609
ENSG00000081154	PCNP	chr3:101292938-101313281	protein_coding	3102	49.3724	41.9309	42.8495	44.5966
ENSG00000081177	EXD2	chr14:69658227-69709075	protein_coding	4601	5.115	5.4959	4.4809	4.914
ENSG00000081181	ARG2	chr14:68086514-68118437	protein_coding	2418	1.1417	1.1192	2.5768	0.7132
ENSG00000081189	MEF2C	chr5:88013974-88199922	protein_coding	9053	10.5834	9.4538	7.1789	14.9106
ENSG00000081237	PTPRC	chr1:198607800-198726545	protein_coding	8507	0	0	0.0357	0
ENSG00000081248	CACNA1S	chr1:201008641-201081694	protein_coding	6166	0.6239	1.1658	0.8297	0.839
ENSG00000081277	PKP1	chr1:201252579-201302121	protein_coding	6211	0.5392	1.0212	1.1336	0.509
ENSG00000081307	UBA5	chr3:132373289-132396941	protein_coding	6827	6.4901	6.6398	5.6687	7.1568
ENSG00000081320	STK17B	chr2:196998289-197041227	protein_coding	6580	8.9759	7.5188	8.4297	6.6101
ENSG00000081377	CDC14B	chr9:99252522-99382112	protein_coding	10457	4.1679	5.0061	5.1687	5.2862
ENSG00000081386	ZNF510	chr9:99518146-99540411	protein_coding	5921	8.3927	8.7413	6.9468	6.9898
ENSG00000081479	LRP2	chr2:169983618-170219195	protein_coding	16260	0.1002	0.052	0.1682	0.0943
ENSG00000081665	ZNF506	chr19:19896647-19932560	protein_coding	8414	0.0323	0	0.006	0.0114
ENSG00000081692	JMJD4	chr1:227918125-227923112	protein_coding	4315	3.7444	5.6642	4.0735	4.0408
ENSG00000081721	DUSP12	chr1:161719547-161727028	protein_coding	1762	11.5328	11.6153	10.6945	13.5928
ENSG00000081760	AACS	chr12:125549924-125627873	protein_coding	16089	1.1899	1.5927	1.102	1.1671
ENSG00000081791	KIAA0141	chr5:141303372-141321612	protein_coding	6047	8.405	9.4123	9.2565	8.9037
ENSG00000081800	SLC13A1	chr7:122753584-122840040	protein_coding	4415	0	0.0192	0	0
ENSG00000081803	CADPS2	chr7:121958480-122526813	protein_coding	6364	0.9458	0.9169	0.7243	0.4065
ENSG00000081818	PCDHB4	chr5:140501580-140505201	protein_coding	3621	1.2874	1.3313	1.329	0.926
ENSG00000081842	PCDHA6	chr5:140207562-140391929	protein_coding	5374	0.3874	0.3934	0.2734	0.2496
ENSG00000081853	PCDHGA2	chr5:140718538-140892546	protein_coding	4653	0.1362	0.1272	0.2286	0.2059
ENSG00000081870	HSPB11	chr1:54382246-54411602	protein_coding	3236	10.783	9.3561	10.9262	11.0131
ENSG00000081913	PHLPP1	chr18:60382671-60647666	protein_coding	9153	3.5305	3.9453	3.1545	4.1344
ENSG00000081923	ATP8B1	chr18:55313657-55470333	protein_coding	6652	0.1837	0.1653	0.0152	0
ENSG00000081985	IL12RB2	chr1:67773046-67862583	protein_coding	4233	0	0	0.0239	0
ENSG00000082014	SMARCD3	chr7:150935849-150974982	protein_coding	5198	18.2147	17.5714	18.925	23.5728
ENSG00000082068	WDR70	chr5:37379313-37753537	protein_coding	7039	9.1429	8.254	8.2254	9.2686
ENSG00000082074	FYB	chr5:39105337-39274630	protein_coding	6100	0.2003	0.3189	0.4318	0.6125
ENSG00000082126	MPP4	chr2:202509592-202563417	protein_coding	4978	0.1182	0.0849	0.0611	0.0962
ENSG00000082146	STRADB	chr2:202252580-202345569	protein_coding	3242	11.6146	10.9561	13.3747	15.4549
ENSG00000082153	BZW1	chr2:201675316-201688569	protein_coding	4593	54.6092	59.3633	57.4489	54.8992
ENSG00000082175	PGR	chr11:100900354-101001255	protein_coding	15305	0.0118	0.0111	0.0099	0
ENSG00000082196	C1QTNF3	chr5:34019552-34043937	protein_coding	3576	40.8031	45.1469	28.7839	17.762
ENSG00000082212	ME2	chr18:48405418-48474691	protein_coding	3427	19.7831	17.6446	23.2213	23.2587
ENSG00000082213	C5orf22	chr5:31532372-31555165	protein_coding	4172	7.3116	6.0205	8.1592	9.346
ENSG00000082258	CCNT2	chr2:135675804-135716912	protein_coding	9081	14.1042	13.9601	13.2872	13.2083
ENSG00000082269	FAM135A	chr6:71122643-71270877	protein_coding	10589	3.9279	4.6562	3.4587	4.1165
ENSG00000082293	COL19A1	chr6:70576462-70919679	protein_coding	8333	3.1718	3.1563	3.3495	2.6328
ENSG00000082397	EPB41L3	chr18:5392382-5630699	protein_coding	10975	6.7671	5.8872	8.6125	5.447
ENSG00000082438	COBLL1	chr2:165510133-165700189	protein_coding	17176	0.2424	0.2363	0.3215	0.3681
ENSG00000082458	DLG3	chrX:69664710-69725337	protein_coding	7841	5.0043	5.1987	5.6851	5.1316
ENSG00000082482	KCNK2	chr1:215179117-215410436	protein_coding	3910	1.1806	1.4708	2.7854	1.8376
ENSG00000082497	SERTAD4	chr1:210406143-210419976	protein_coding	5467	17.0038	15.0052	16.2612	11.0575
ENSG00000082512	TRAF5	chr1:211499956-211548288	protein_coding	9022	4.6853	4.4526	4.1211	4.3006
ENSG00000082515	MRPL22	chr5:154320629-154348971	protein_coding	5267	3.6004	3.4682	4.4625	4.0926
ENSG00000082516	GEMIN5	chr5:154266975-154317769	protein_coding	5637	15.5677	16.113	15.3484	19.4936
ENSG00000082556	OPRK1	chr8:54138283-54164257	protein_coding	5730	0.1817	0.1033	0.2387	0.0502
ENSG00000082641	NFE2L1	chr17:46125690-46138849	protein_coding	5825	36.2608	33.8863	38.7153	35.6237
ENSG00000082684	SEMA5B	chr3:122628040-122747452	protein_coding	6223	1.36	1.2095	0.521	0.4465
ENSG00000082701	GSK3B	chr3:119540169-119813264	protein_coding	8006	17.9935	18.6761	18.5512	19.1222
ENSG00000082781	ITGB5	chr3:124480794-124620265	protein_coding	6447	2.9554	3.6468	3.0329	1.7535
ENSG00000082805	ERC1	chr12:1099674-1605099	protein_coding	13484	10.3915	10.4616	10.3835	8.8314
ENSG00000082898	XPO1	chr2:61704983-61765761	protein_coding	11708	40.0666	43.1232	38.5582	38.4502
ENSG00000082929	C4orf6	chr4:5526295-5529528	protein_coding	1164	0	0	0	0.0823
ENSG00000082996	RNF13	chr3:149530494-149679926	protein_coding	3635	8.2174	8.492	7.0513	6.1672
ENSG00000083067	TRPM3	chr9:73143978-74061820	protein_coding	19912	0.6523	0.6158	0.6487	0.943
ENSG00000083093	PALB2	chr16:23614487-23652631	protein_coding	4740	7.9345	7.8861	7.1494	7.3974
ENSG00000083097	DOPEY1	chr6:83777384-83881069	protein_coding	10613	5.9829	6.4466	5.4984	6.2737
ENSG00000083099	LYRM2	chr6:90277862-90348472	protein_coding	8679	6.0646	5.6225	5.4805	5.8835
ENSG00000083123	BCKDHB	chr6:80816363-81055987	protein_coding	4102	5.649	6.5768	5.6434	5.4417
ENSG00000083168	KAT6A	chr8:41786996-41909508	protein_coding	11852	17.0195	16.526	14.5401	17.6942
ENSG00000083223	ZCCHC6	chr9:88902647-88969369	protein_coding	6707	10.4862	9.6966	9.7957	10.1987
ENSG00000083290	ULK2	chr17:19674141-19771249	protein_coding	9843	5.8303	5.2926	5.172	4.9055
ENSG00000083307	GRHL2	chr8:102504659-102681954	protein_coding	6060	0.0149	0	0.0334	0
ENSG00000083312	TNPO1	chr5:72112138-72212560	protein_coding	11977	58.1776	56.863	54.4531	60.6954
ENSG00000083444	PLOD1	chr1:11994261-12035595	protein_coding	5320	34.3434	40.7592	41.4573	27.8043
ENSG00000083454	P2RX5	chr17:3575492-3599698	protein_coding	4190	0.0972	0.0202	0.0846	0.1143
ENSG00000083457	ITGAE	chr17:3617921-3704537	protein_coding	6657	0.8226	0.9147	0.8903	0.8635
ENSG00000083520	DIS3	chr13:73329539-73356234	protein_coding	7602	13.8656	12.2039	12.887	13.7365
ENSG00000083535	PIBF1	chr13:73356196-73590591	protein_coding	3669	12.9767	13.9914	11.0588	12.6901
ENSG00000083544	TDRD3	chr13:60970590-61148012	protein_coding	4112	11.2044	9.8926	9.1652	9.0863
ENSG00000083622	AC000111.6	chr7:117244844-117287469	antisense	376	0	0	0	0
ENSG00000083635	NUFIP1	chr13:45513383-45563618	protein_coding	3492	7.88	7.3382	7.9348	9.1358
ENSG00000083642	PDS5B	chr13:33160563-33352157	protein_coding	13212	15.8259	15.2153	11.9852	12.6968
ENSG00000083720	OXCT1	chr5:41730166-41870621	protein_coding	4194	8.9243	9.1144	9.9764	6.3274
ENSG00000083750	RRAGB	chrX:55744171-55785207	protein_coding	2725	4.3514	5.5553	4.5543	4.922
ENSG00000083782	EPYC	chr12:91357455-91398803	protein_coding	1805	0.0251	0	0	0.0531
ENSG00000083799	CYLD	chr16:50775960-50835846	protein_coding	12963	2.3671	2.5966	2.0828	1.8846
ENSG00000083807	SLC27A5	chr19:58990878-59023780	protein_coding	8025	0.8008	0.6955	0.6691	0.7521
ENSG00000083812	ZNF324	chr19:58978422-58984945	protein_coding	3795	2.8622	3.5878	2.3626	2.6507
ENSG00000083814	ZNF671	chr19:58231118-58238992	protein_coding	3532	1.5376	1.1972	0.9896	0.7595
ENSG00000083817	ZNF416	chr19:58082933-58090295	protein_coding	2561	2.9336	3.9627	2.5318	2.8804
ENSG00000083828	ZNF586	chr19:58281022-58331307	protein_coding	3261	5.0102	6.302	4.9242	5.1118
ENSG00000083838	ZNF446	chr19:58985383-58992597	protein_coding	4923	2.4362	2.9719	2.737	2.3352
ENSG00000083842	ZNF8	chr19:58790316-58807254	protein_coding	2211	0	0	0	0
ENSG00000083844	ZNF264	chr19:57702867-57724724	protein_coding	3042	7.9149	8.4793	6.3111	5.5428
ENSG00000083845	RPS5	chr19:58897766-58906173	protein_coding	3617	99.8379	139.213	114.741	102.504
ENSG00000083857	FAT1	chr4:187508936-187647876	protein_coding	16168	85.4579	95.006	82.1549	101.716
ENSG00000083896	YTHDC1	chr4:69176104-69215807	protein_coding	7032	20.8527	18.4968	19.5792	20.7354
ENSG00000083937	CHMP2B	chr3:87276420-87304698	protein_coding	3106	8.3056	7.7873	8.5621	7.3409
ENSG00000084070	SMAP2	chr1:40810521-40888998	protein_coding	3436	8.2718	8.713	8.4917	8.5876
ENSG00000084072	PPIE	chr1:40157853-40229586	protein_coding	8071	2.8935	3.5836	2.9498	2.5402
ENSG00000084073	ZMPSTE24	chr1:40723778-40759856	protein_coding	3572	12.4675	11.5776	11.4726	12.1765
ENSG00000084090	STARD7	chr2:96850596-96874563	protein_coding	4414	30.2575	31.5943	29.6311	32.578
ENSG00000084092	NOA1	chr4:57829535-57844989	protein_coding	3415	11.6889	10.2773	10.9024	10.6322
ENSG00000084093	REST	chr4:57774074-57802010	protein_coding	7875	27.7583	27.2237	22.8994	23.7468
ENSG00000084110	HAL	chr12:96366439-96390143	protein_coding	5146	0.0088	0.0329	0.0098	0.0931
ENSG00000084112	SSH1	chr12:109176465-109251366	protein_coding	10039	4.8779	5.7369	4.6573	4.991
ENSG00000084207	GSTP1	chr11:67351065-67354131	protein_coding	1925	135.892	137.993	153.992	126.559
ENSG00000084234	APLP2	chr11:129939731-130014699	protein_coding	7444	28.5872	26.2778	35.0313	31.6853
ENSG00000084444	KIAA1467	chr12:13197217-13295455	protein_coding	6807	1.0572	1.1554	0.759	0.7178
ENSG00000084453	SLCO1A2	chr12:21417533-21572528	protein_coding	11637	0.3422	0.2689	0.3352	0.1729
ENSG00000084463	WBP11	chr12:14939409-14956474	protein_coding	3418	38.1608	36.5203	44.5345	42.2113
ENSG00000084623	EIF3I	chr1:32687528-32697205	protein_coding	1725	84.9277	81.0408	101.31	95.9135
ENSG00000084628	NKAIN1	chr1:31652591-31712401	protein_coding	2987	5.1364	4.8415	6.7156	8.1466
ENSG00000084636	COL16A1	chr1:32117847-32169920	protein_coding	9365	12.217	12.8594	8.9302	5.0024
ENSG00000084652	TXLNA	chr1:32645286-32663886	protein_coding	5103	22.8463	25.5386	24.5285	22.5848
ENSG00000084674	APOB	chr2:21224300-21266945	protein_coding	14828	0.0275	0.0114	0.0205	0
ENSG00000084676	NCOA1	chr2:24714782-24993571	protein_coding	8633	47.6224	45.8659	39.9585	57.2728
ENSG00000084693	AGBL5	chr2:27265231-27293490	protein_coding	5283	8.8837	7.8119	10.9019	10.6266
ENSG00000084710	EFR3B	chr2:25264998-25378243	protein_coding	6828	1.7366	2.1428	2.463	1.9222
ENSG00000084731	KIF3C	chr2:26149470-26205618	protein_coding	6397	4.7897	4.8783	5.8835	4.7474
ENSG00000084733	RAB10	chr2:26256975-26360323	protein_coding	3631	43.7249	35.2863	46.8745	46.6743
ENSG00000084734	GCKR	chr2:27719708-27746554	protein_coding	3149	0.0144	0	0	0.0304
ENSG00000084754	HADHA	chr2:26413503-26467594	protein_coding	3971	51.8912	56.0752	47.2492	46.9482
ENSG00000084764	MAPRE3	chr2:27193479-27250064	protein_coding	3459	0.5626	0.4645	0.7615	0.8586
ENSG00000084774	CAD	chr2:27440257-27466811	protein_coding	8422	9.3181	11.6383	9.5572	9.396
ENSG00000085063	CD59	chr11:33719806-33757991	protein_coding	4942	11.1542	12.8345	13.0379	14.8298
ENSG00000085117	CD82	chr11:44585976-44641913	protein_coding	4054	9.612	9.4709	7.0972	8.5074
ENSG00000085185	BCORL1	chrX:129115082-129192058	protein_coding	7996	3.43	3.522	2.42	3.0432
ENSG00000085224	ATRX	chrX:76760355-77041702	protein_coding	12224	40.2376	33.9763	32.5711	35.3381
ENSG00000085231	TAF9	chr5:68646810-68665840	protein_coding	4050	15.8794	15.8909	17.2603	19.2314
ENSG00000085265	FCN1	chr9:137801430-137809809	protein_coding	1286	0	0	0	0
ENSG00000085274	MYNN	chr3:169490618-169507504	protein_coding	5730	6.7769	6.6417	6.4888	5.7013
ENSG00000085276	MECOM	chr3:168801286-169381406	protein_coding	9103	0.1392	0.1301	0.9627	0.5683
ENSG00000085365	SCAMP1	chr5:77656338-77776562	protein_coding	6842	7.3291	7.2927	8.366	8.0092
ENSG00000085377	PREP	chr6:105725439-105850959	protein_coding	3762	8.349	9.5091	8.5772	9.0149
ENSG00000085382	HACE1	chr6:105175967-105307794	protein_coding	9238	2.4251	2.4901	2.303	1.9082
ENSG00000085415	SEH1L	chr18:12947131-12987535	protein_coding	10481	4.1929	5.0673	4.2241	5.4386
ENSG00000085433	WDR47	chr1:109512835-109584850	protein_coding	4536	5.1085	5.6492	5.7735	4.6887
ENSG00000085449	WDFY1	chr2:224720432-224810104	protein_coding	5516	15.4826	15.0712	18.0728	18.2539
ENSG00000085465	OVGP1	chr1:111956935-111970399	protein_coding	2988	0.3332	0.3113	0.373	0.1603
ENSG00000085491	SLC25A24	chr1:108676657-108743471	protein_coding	6548	18.0258	18.1075	17.4678	16.723
ENSG00000085511	MAP3K4	chr6:161412758-161538417	protein_coding	7522	11.7989	13.3231	10.5122	11.4627
ENSG00000085514	PILRA	chr7:99965152-99997719	protein_coding	2003	0.4745	0.5067	0.2276	0.6218
ENSG00000085552	IGSF9	chr1:159896828-159915386	protein_coding	6620	0.8272	1.2136	1.2319	1.1433
ENSG00000085563	ABCB1	chr7:87133174-87342611	protein_coding	5552	0.0082	0	0.0365	0
ENSG00000085644	ZNF213	chr16:3179777-3192806	protein_coding	6443	1.1169	1.2338	1.3208	1.0557
ENSG00000085662	AKR1B1	chr7:134127101-134144036	protein_coding	3660	29.7887	42.0312	29.6457	30.5206
ENSG00000085719	CPNE3	chr8:87497058-87573726	protein_coding	6792	14.6396	15.0041	13.8496	11.8625
ENSG00000085721	RRN3	chr16:15153878-15188174	protein_coding	4156	8.6138	10.317	8.215	8.1142
ENSG00000085733	CTTN	chr11:70244509-70282690	protein_coding	6949	14.4651	14.7868	13.3035	16.8057
ENSG00000085741	WNT11	chr11:75897368-75921780	protein_coding	2401	0.1131	0.317	0.7173	0.1197
ENSG00000085760	MTIF2	chr2:55463730-55496483	protein_coding	3371	15.5872	13.7982	13.9298	13.4425
ENSG00000085788	DDHD2	chr8:38082735-38133076	protein_coding	10686	6.0607	6.7429	6.2146	5.7915
ENSG00000085831	TTC39A	chr1:51752929-51810788	protein_coding	9362	0.0193	0.0181	0.0433	0.0102
ENSG00000085832	EPS15	chr1:51819934-51985000	protein_coding	7551	12.1791	10.8863	11.733	8.0565
ENSG00000085840	ORC1	chr1:52838500-52870131	protein_coding	3157	9.1892	10.7689	9.4507	8.2845
ENSG00000085871	MGST2	chr4:140586921-140661899	protein_coding	3182	2.1761	2.1794	2.8018	2.529
ENSG00000085872	CHERP	chr19:16628699-16653341	protein_coding	6113	3.0799	4.1089	2.9334	3.1501
ENSG00000085978	ATG16L1	chr2:234118696-234204320	protein_coding	6047	4.5355	4.2516	4.2555	3.3746
ENSG00000085982	USP40	chr2:234384165-234475428	protein_coding	9352	5.1491	5.887	4.4957	5.1528
ENSG00000085998	POMGNT1	chr1:46654353-46685977	protein_coding	6366	7.5928	8.0373	6.5726	7.4493
ENSG00000085999	RAD54L	chr1:46713359-46744145	protein_coding	3212	5.3543	6.5561	5.8824	4.9512
ENSG00000086015	MAST2	chr1:46252658-46501796	protein_coding	7877	8.2449	8.5354	9.7426	9.3285
ENSG00000086061	DNAJA1	chr9:33025208-33039905	protein_coding	2730	97.7938	93.7712	100.605	121.63
ENSG00000086062	B4GALT1	chr9:33104079-33167354	protein_coding	5065	3.9137	4.408	5.3405	3.4235
ENSG00000086065	CHMP5	chr9:33264939-33281977	protein_coding	2237	24.9051	22.7588	24.7502	21.0705
ENSG00000086102	NFX1	chr9:33290508-33371155	protein_coding	7147	9.0427	8.6854	8.3138	9.0481
ENSG00000086159	AQP6	chr12:50360976-50370922	protein_coding	5129	0.0353	0	0	0
ENSG00000086189	DIMT1	chr5:61683080-61699766	protein_coding	3736	7.5713	7.4475	7.8098	9.5392
ENSG00000086200	IPO11	chr5:61699798-61924409	protein_coding	7540	5.7023	6.225	4.9379	5.5652
ENSG00000086205	FOLH1	chr11:49168186-49230222	protein_coding	3824	0	0.0221	0	0
ENSG00000086232	EIF2AK1	chr7:6061880-6098861	protein_coding	5544	18.6044	17.5274	21.5723	23.052
ENSG00000086288	NME8	chr7:37888198-37940003	protein_coding	2439	0	0	0	0
ENSG00000086289	EPDR1	chr7:37723445-37991543	protein_coding	2864	4.0928	3.7502	4.1564	5.1514
ENSG00000086300	SNX10	chr7:26331540-26413949	protein_coding	3421	0.5027	0.1978	0.6959	0.308
ENSG00000086475	SEPHS1	chr10:13359423-13390297	protein_coding	3979	35.897	36.9611	38.421	36.7897
ENSG00000086504	MRPL28	chr16:417383-420527	protein_coding	2404	14.3267	16.8156	16.9834	13.7487
ENSG00000086506	HBQ1	chr16:230451-231180	protein_coding	536	0	0	0.2835	0
ENSG00000086544	ITPKC	chr19:41223007-41246765	protein_coding	3385	3.5698	4.2473	3.5915	2.3774
ENSG00000086548	CEACAM6	chr19:42254884-42276113	protein_coding	3052	0	0.0277	0	0
ENSG00000086570	FAT2	chr5:150883653-150948505	protein_coding	14537	0.0311	0.0175	0.0209	0
ENSG00000086589	RBM22	chr5:150070355-150080669	protein_coding	3631	17.8115	19.6811	21.9445	22.8754
ENSG00000086598	TMED2	chr12:124069077-124083116	protein_coding	3822	48.917	48.8572	50.0588	44.9685
ENSG00000086619	ERO1LB	chr1:236378854-236445319	protein_coding	5688	0.557	0.6691	0.5432	0.5053
ENSG00000086666	ZFAND6	chr15:80351909-80430735	protein_coding	5065	13.153	13.4912	13.4414	12.0108
ENSG00000086696	HSD17B2	chr16:82068608-82132139	protein_coding	2688	0.0505	0.0629	0.0377	0.1069
ENSG00000086712	TXLNG	chrX:16804549-16862642	protein_coding	4460	13.7905	13.1976	13.5383	15.9814
ENSG00000086717	PPEF1	chrX:18694028-18846039	protein_coding	3515	0.0258	0.1444	0.1585	0.0818
ENSG00000086730	LAT2	chr7:73613981-73644161	protein_coding	4542	0.0897	0.1303	0.1115	0.1476
ENSG00000086758	HUWE1	chrX:53559056-53713673	protein_coding	17373	31.4459	34.8642	29.554	31.1731
ENSG00000086827	ZW10	chr11:113603908-113644533	protein_coding	2992	18.439	18.627	19.7575	16.0418
ENSG00000086848	ALG9	chr11:111652918-111742305	protein_coding	8014	3.0722	3.4508	2.8065	2.7256
ENSG00000086967	MYBPC2	chr19:50936159-50969578	protein_coding	3708	0.7689	0.5474	0.3415	0.3617
ENSG00000086991	NOX4	chr11:89057523-89322779	protein_coding	6327	1.1946	1.7109	3.5628	1.1962
ENSG00000087008	ACOX3	chr4:8368008-8442450	protein_coding	3846	3.9892	5.9591	4.1488	4.5834
ENSG00000087053	MTMR2	chr11:95566045-95658479	protein_coding	6119	11.4347	10.5869	11.4324	11.899
ENSG00000087074	PPP1R15A	chr19:49375648-49379314	protein_coding	3093	28.8551	24.581	24.5005	18.2746
ENSG00000087076	HSD17B14	chr19:49316273-49339935	protein_coding	1281	1.5545	0.7262	0.8304	0.8974
ENSG00000087077	TRIP6	chr7:100464759-100471076	protein_coding	2802	8.4475	11.8918	8.2979	8.9922
ENSG00000087085	ACHE	chr7:100487614-100494594	protein_coding	3730	0.2912	0.2494	0.3667	0.3853
ENSG00000087086	FTL	chr19:49468557-49470135	protein_coding	878	309.229	314.01	400.914	312.831
ENSG00000087087	SRRT	chr7:100472732-100486285	protein_coding	4587	27.6758	26.7521	23.003	32.1639
ENSG00000087088	BAX	chr19:49458071-49465055	protein_coding	2587	6.8403	5.7209	6.5008	6.2584
ENSG00000087095	NLK	chr17:26368762-26523407	protein_coding	5288	5.3149	4.9418	5.0195	7.3555
ENSG00000087111	PIGS	chr17:26880400-26898890	protein_coding	5990	4.2991	5.0545	5.5222	5.102
ENSG00000087116	ADAMTS2	chr5:178537851-178772431	protein_coding	7687	1.0892	0.9792	1.4959	0.4861
ENSG00000087128	TMPRSS11E	chr4:69313166-69363322	protein_coding	2138	0	0	0.0474	0
ENSG00000087152	ATXN7L3	chr17:42269172-42277481	protein_coding	5301	10.9196	13.6404	10.0527	9.0182
ENSG00000087157	PGS1	chr17:76374720-76421195	protein_coding	4965	4.4392	5.5699	4.9686	4.9204
ENSG00000087191	PSMC5	chr17:61904511-61909379	protein_coding	4483	11.9732	11.7339	11.8079	11.6254
ENSG00000087206	UIMC1	chr5:176332005-176449634	protein_coding	4852	10.6336	11.1727	9.1455	9.833
ENSG00000087237	CETP	chr16:56995761-57017757	protein_coding	2085	0	0	0	0
ENSG00000087245	MMP2	chr16:55423611-55540603	protein_coding	4933	20.3583	22.3385	23.7205	16.3522
ENSG00000087250	MT3	chr16:56622985-56625000	protein_coding	1837	0	0	0	0.0522
ENSG00000087253	LPCAT2	chr16:55542909-55620582	protein_coding	7439	0.3346	0.523	0.5379	0.2318
ENSG00000087258	GNAO1	chr16:56225301-56391356	protein_coding	9813	0.0876	0.1207	0.0465	0.0488
ENSG00000087263	OGFOD1	chr16:56485401-56513012	protein_coding	5806	11.6224	10.575	12.8252	13.3985
ENSG00000087266	SH3BP2	chr4:2794749-2842825	protein_coding	13968	2.8772	3.1484	2.7344	2.2359
ENSG00000087269	NOP14	chr4:2939659-2965112	protein_coding	3538	28.1552	24.8597	25.7857	31.3835
ENSG00000087274	ADD1	chr4:2845583-2931803	protein_coding	13106	17.6736	17.9453	18.4865	19.1956
ENSG00000087299	L2HGDH	chr14:50704280-50779266	protein_coding	3911	1.8747	2.4867	1.5542	1.5922
ENSG00000087301	TXNDC16	chr14:52897307-53019240	protein_coding	4739	3.7341	4.3008	4.1366	3.6793
ENSG00000087302	C14orf166	chr14:52456192-52471420	protein_coding	2334	99.3583	79.2805	96.5356	111.852
ENSG00000087303	NID2	chr14:52471520-52535712	protein_coding	6158	3.028	3.2274	4.4009	2.7381
ENSG00000087338	GMCL1	chr2:70056773-70108528	protein_coding	4922	4.0826	4.5189	3.8388	4.2237
ENSG00000087365	SF3B2	chr11:65818199-65836779	protein_coding	9795	26.3416	26.0576	24.42	24.7844
ENSG00000087448	KLHL42	chr12:27932952-27955973	protein_coding	7622	8.1882	8.2218	8.8324	8.9618
ENSG00000087460	GNAS	chr20:57414772-57486247	protein_coding	13320	95.4428	92.196	98.6293	102.7
ENSG00000087470	DNM1L	chr12:32832133-32898486	protein_coding	7184	27.4736	25.1805	26.2513	28.1379
ENSG00000087494	PTHLH	chr12:28111016-28125638	protein_coding	3377	0.0268	0	0.09	0.0284
ENSG00000087495	PHACTR3	chr20:58152563-58422766	protein_coding	6095	1.7376	1.332	1.0638	0.4715
ENSG00000087502	ERGIC2	chr12:29490284-29534122	protein_coding	5826	15.723	15.2419	13.9202	15.408
ENSG00000087510	TFAP2C	chr20:55204357-55214339	protein_coding	3112	0	0.0815	0.0326	0.0308
ENSG00000087586	AURKA	chr20:54944444-54967393	protein_coding	2928	19.3831	22.6446	26.5732	26.4045
ENSG00000087589	CASS4	chr20:54987167-55034396	protein_coding	4025	5.3298	4.7065	3.5113	5.9029
ENSG00000087842	PIR	chrX:15402920-15511687	protein_coding	2512	5.6573	5.555	7.3603	8.0471
ENSG00000087884	AAMDC	chr11:77532154-77629478	protein_coding	1943	4.1228	4.3091	4.5102	4.191
ENSG00000087903	RFX2	chr19:5993174-6199583	protein_coding	9094	1.0949	1.2368	1.1809	0.906
ENSG00000087916	SLC6A14	chrX:115567789-115592625	protein_coding	4521	0.01	0	0	0
ENSG00000087995	METTL2A	chr17:60501227-60527454	protein_coding	3114	9.8103	8.0931	8.0359	8.5835
ENSG00000088002	SULT2B1	chr19:49055331-49102682	protein_coding	2822	0	0	0	0.0679
ENSG00000088035	ALG6	chr1:63833260-63904233	protein_coding	4950	3.7029	4.3567	3.4486	3.0386
ENSG00000088038	CNOT3	chr19:54641443-54659419	protein_coding	6697	6.1903	4.5082	5.7561	6.9953
ENSG00000088053	GP6	chr19:55525072-55549632	protein_coding	2703	0.0167	0.0626	0	0.0354
ENSG00000088179	PTPN4	chr2:120517206-120741394	protein_coding	12542	3.8503	4.3425	3.4653	3.8575
ENSG00000088205	DDX18	chr2:118572225-118589955	protein_coding	7851	11.8521	11.9784	11.3169	12.6175
ENSG00000088247	KHSRP	chr19:6413358-6424805	protein_coding	4563	26.1352	27.7825	26.4544	26.9582
ENSG00000088256	GNA11	chr19:3094407-3124002	protein_coding	6242	7.2723	7.2485	7.7825	7.5052
ENSG00000088280	ASAP3	chr1:23755055-23811061	protein_coding	4988	12.8025	14.7337	12.3794	10.3331
ENSG00000088298	EDEM2	chr20:33703166-33865928	protein_coding	3380	2.5307	3.1777	2.9674	3.2595
ENSG00000088305	DNMT3B	chr20:31350190-31397162	protein_coding	4630	3.9295	4.6212	4.6279	3.8693
ENSG00000088320	REM1	chr20:30063095-30072708	protein_coding	1665	0	0	0	0.0575
ENSG00000088325	TPX2	chr20:30327073-30389608	protein_coding	3605	62.2565	56.6072	75.4418	81.1862
ENSG00000088340	FER1L4	chr20:34146506-34195484	pseudogene	9212	0.2555	0.1928	0.1925	0.468
ENSG00000088356	PDRG1	chr20:30532757-30539895	protein_coding	1385	5.1303	4.7628	4.3157	4.5653
ENSG00000088367	EPB41L1	chr20:34679425-34820721	protein_coding	7859	2.5339	2.5719	2.894	2.7306
ENSG00000088386	SLC15A1	chr13:99336054-99404908	protein_coding	4192	0.0432	0.0202	0.0483	0.0457
ENSG00000088387	DOCK9	chr13:99445740-99738879	protein_coding	10061	24.8175	25.3435	24.0211	33.3085
ENSG00000088448	ANKRD10	chr13:111530886-111567416	protein_coding	4557	20.1213	21.3422	18.3968	18.7737
ENSG00000088451	TGDS	chr13:95226307-95248511	protein_coding	2586	3.7628	3.4665	3.7609	2.7044
ENSG00000088538	DOCK3	chr3:50712671-51421629	protein_coding	8755	0.0724	0.0869	0.0752	0.0438
ENSG00000088543	C3orf18	chr3:50595461-50608458	protein_coding	3242	2.6105	2.739	2.9999	2.3345
ENSG00000088682	COQ9	chr16:57481336-57495187	protein_coding	4324	9.9329	10.4638	11.6797	10.5905
ENSG00000088726	TMEM40	chr3:12775023-12810956	protein_coding	3562	0.0127	0	0	0
ENSG00000088727	KIF9	chr3:47269515-47324941	protein_coding	5867	0.8794	1.0234	0.9066	0.7838
ENSG00000088756	ARHGAP28	chr18:6729716-6915715	protein_coding	11910	16.6858	18.597	12.4745	10.6179
ENSG00000088766	CRLS1	chr20:5986735-6020699	protein_coding	5370	6.0175	6.1578	5.7353	5.6554
ENSG00000088782	DEFB127	chr20:138110-139804	protein_coding	514	0	0	0	0
ENSG00000088808	PPP1R13B	chr14:104200088-104313927	protein_coding	9031	0.4159	0.4963	0.4768	0.7532
ENSG00000088812	ATRN	chr20:3451686-3631769	protein_coding	8753	12.8075	12.3479	12.6276	13.1341
ENSG00000088826	SMOX	chr20:4101626-4168394	protein_coding	4943	1.8495	2.7546	2.6235	3.1979
ENSG00000088827	SIGLEC1	chr20:3667616-3687775	protein_coding	7886	0	0	0.0193	0.0243
ENSG00000088832	FKBP1A	chr20:1349621-1373806	protein_coding	2369	30.0319	30.1299	36.3289	32.2307
ENSG00000088833	NSFL1C	chr20:1422806-1454487	protein_coding	6617	9.4661	8.282	9.5309	10.2795
ENSG00000088836	SLC4A11	chr20:3208062-3219836	protein_coding	4081	0.2772	0.0829	0.3103	0.3052
ENSG00000088854	C20orf194	chr20:3229950-3388272	protein_coding	8864	4.9731	5.2666	5.2061	4.3556
ENSG00000088876	ZNF343	chr20:2462462-2505348	protein_coding	4520	6.1979	5.9499	5.3121	5.5955
ENSG00000088881	EBF4	chr20:2673523-2740753	protein_coding	3716	1.2057	1.5476	1.813	1.2633
ENSG00000088882	CPXM1	chr20:2774714-2781283	protein_coding	2391	32.2542	33.7788	36.7785	31.6537
ENSG00000088888	MAVS	chr20:3827486-3849280	protein_coding	4240	12.0083	13.4037	13.1656	12.0431
ENSG00000088899	LZTS3	chr20:3143262-3154192	protein_coding	5349	0.9053	1.0435	0.9944	1.0746
ENSG00000088926	F11	chr4:187187098-187210835	protein_coding	4243	0	0	0	0.0452
ENSG00000088930	XRN2	chr20:21283941-21370463	protein_coding	3489	65.7273	65.7126	62.9669	66.4493
ENSG00000088970	PLK1S1	chr20:21106623-21227260	processed_transcript	4802	6.588	7.2031	5.9601	6.1448
ENSG00000088986	DYNLL1	chr12:120907652-120936296	protein_coding	2957	43.7428	44.4732	45.5503	59.7428
ENSG00000088992	TESC	chr12:117476727-117537284	protein_coding	1926	0.188	0.0878	0.3682	0.0995
ENSG00000089006	SNX5	chr20:17922240-17949623	protein_coding	7894	19.5388	21.7587	19.2251	19.794
ENSG00000089009	RPL6	chr12:112842993-112856642	protein_coding	4447	388.688	374.72	355.987	385.493
ENSG00000089012	SIRPG	chr20:1609797-1638425	protein_coding	2242	0	0	0	0
ENSG00000089022	MAPKAPK5	chr12:112279781-112334343	protein_coding	5576	9.2448	9.7523	9.2753	9.9307
ENSG00000089041	P2RX7	chr12:121570621-121623876	protein_coding	3587	0.0505	0.1179	0	0
ENSG00000089048	ESF1	chr20:13694968-13765532	protein_coding	3216	25.9361	20.0119	21.3268	27.7636
ENSG00000089050	RBBP9	chr20:18467183-18477887	protein_coding	3861	12.2259	11.4995	13.9331	11.7365
ENSG00000089053	ANAPC5	chr12:121746047-121837699	protein_coding	12304	10.5163	12.166	10.9882	10.5037
ENSG00000089057	SLC23A2	chr20:4833001-4990939	protein_coding	7523	4.891	5.4185	4.2757	5.4504
ENSG00000089060	SLC8B1	chr12:113736563-113797298	protein_coding	6768	0.9897	0.9247	0.9281	0.2973
ENSG00000089063	TMEM230	chr20:5080485-5093749	protein_coding	2038	29.3133	25.3961	34.3501	36.0552
ENSG00000089091	DZANK1	chr20:18364010-18447925	protein_coding	6637	1.1115	0.7773	1.1677	1.0104
ENSG00000089094	KDM2B	chr12:121866899-122018920	protein_coding	13623	2.784	2.9177	2.8892	3.2419
ENSG00000089101	C20orf26	chr20:20033157-20341346	protein_coding	7319	0.0989	0.1155	0.0969	0.0916
ENSG00000089116	LHX5	chr12:113899838-113910085	protein_coding	3125	0.0579	0.1083	0.0486	0.0307
ENSG00000089123	TASP1	chr20:13246708-13619587	protein_coding	3365	3.2952	3.5688	3.4623	3.0463
ENSG00000089127	OAS1	chr12:113344581-113369990	protein_coding	3910	0.0231	0	0	0.1225
ENSG00000089154	GCN1L1	chr12:120565006-120632513	protein_coding	9654	16.4315	22.1019	18.0132	18.964
ENSG00000089157	RPLP0	chr12:120634488-120639038	protein_coding	4001	344.011	395.1	354.738	334.626
ENSG00000089159	PXN	chr12:120648249-120703574	protein_coding	7452	4.9254	5.1183	4.3164	5.3095
ENSG00000089163	SIRT4	chr12:120740118-120751052	protein_coding	1222	1.2592	1.7302	1.9483	1.176
ENSG00000089169	RPH3A	chr12:113008183-113336686	protein_coding	10381	0.0218	0	0	0.0369
ENSG00000089177	KIF16B	chr20:16252748-16554078	protein_coding	6278	14.7712	13.0129	10.457	10.27
ENSG00000089195	TRMT6	chr20:5917880-5931182	protein_coding	3754	7.7158	6.6233	7.4755	8.3961
ENSG00000089199	CHGB	chr20:5892075-5906007	protein_coding	4535	0.3692	0.3543	0.2792	0.169
ENSG00000089220	PEBP1	chr12:118573662-118583389	protein_coding	1780	122.705	119.159	113.433	117.062
ENSG00000089225	TBX5	chr12:114791735-114846247	protein_coding	4363	0.0104	0	0	0
ENSG00000089234	BRAP	chr12:112079949-112123790	protein_coding	4686	9.8996	9.0057	10.0964	8.8115
ENSG00000089248	ERP29	chr12:112451119-112461255	protein_coding	3083	34.3215	26.0049	28.7205	28.402
ENSG00000089250	NOS1	chr12:117645946-117889975	protein_coding	13144	0.0344	0.0257	0.0462	0.0364
ENSG00000089280	FUS	chr16:31191430-31203127	protein_coding	7218	15.4183	18.1374	11.4111	13.7372
ENSG00000089289	IGBP1	chrX:69353298-69386174	protein_coding	1862	25.2784	26.3432	24.0218	23.5133
ENSG00000089327	FXYD5	chr19:35645632-35660786	protein_coding	2993	0.2419	0.2543	0.6939	0.096
ENSG00000089335	ZNF302	chr19:35168543-35177302	protein_coding	5032	16.2432	14.8234	13.5094	13.0415
ENSG00000089351	GRAMD1A	chr19:35485687-35517375	protein_coding	5942	5.5449	6.4901	7.5275	7.5616
ENSG00000089356	FXYD3	chr19:35606731-35615228	protein_coding	3385	0	0	0	0
ENSG00000089472	HEPH	chrX:65382390-65488709	protein_coding	7113	10.9184	11.0811	8.8235	9.7378
ENSG00000089486	CDIP1	chr16:4560675-4588829	protein_coding	4268	4.7294	5.4095	5.3171	7.0707
ENSG00000089505	CMTM1	chr16:66600293-66613040	protein_coding	1467	2.5915	3.2283	3.3839	2.7428
ENSG00000089558	KCNH4	chr17:40308908-40333296	protein_coding	3924	0.0231	0	0	0
ENSG00000089597	GANAB	chr11:62392297-62414104	protein_coding	4933	41.2671	46.7856	41.8447	36.375
ENSG00000089639	GMIP	chr19:19740284-19754476	protein_coding	3740	1.0891	0.7914	1.1513	1.1527
ENSG00000089682	RBM41	chrX:106307649-106362057	protein_coding	6105	7.3243	6.3445	5.9492	6.7478
ENSG00000089685	BIRC5	chr17:76210266-76221717	protein_coding	3815	24.794	28.4636	27.3392	28.3264
ENSG00000089692	LAG3	chr12:6881677-6887621	protein_coding	3056	0.6516	0.7472	0.3978	0.2821
ENSG00000089693	MLF2	chr12:6857169-6876641	protein_coding	3773	23.3547	20.7784	28.5296	28.8702
ENSG00000089723	OTUB2	chr14:94492674-94515276	protein_coding	4252	1.4369	1.3525	1.6202	0.9914
ENSG00000089737	DDX24	chr14:94517265-94547591	protein_coding	6007	45.0169	42.6162	44.1704	56.5373
ENSG00000089775	ZBTB25	chr14:64915823-64971931	protein_coding	12229	2.2649	2.2406	2.4315	2.0525
ENSG00000089818	NECAP1	chr12:8234806-8250367	protein_coding	4155	7.4613	7.6531	7.9122	7.3322
ENSG00000089820	ARHGAP4	chrX:153172820-153200452	protein_coding	5580	0.6245	1.0609	0.9713	1.5795
ENSG00000089847	ANKRD24	chr19:4183350-4224811	protein_coding	4474	0.0809	0.1134	0.0793	0.1285
ENSG00000089876	DHX32	chr10:127524905-127585005	protein_coding	3948	10.4547	13.174	11.3807	11.308
ENSG00000089902	RCOR1	chr14:103058997-103196913	protein_coding	6202	17.0247	17.9723	14.2605	16.76
ENSG00000089916	GPATCH2L	chr14:76618258-76720685	protein_coding	21987	7.1262	7.2735	6.2251	6.3833
ENSG00000090006	LTBP4	chr19:41098788-41135725	protein_coding	8109	13.0768	17.5003	9.7137	9.7468
ENSG00000090013	BLVRB	chr19:40953695-40971747	protein_coding	1665	5.3005	5.2825	6.8149	6.3293
ENSG00000090020	SLC9A1	chr1:27425305-27493472	protein_coding	5974	1.3637	1.8545	1.7298	1.3471
ENSG00000090054	SPTLC1	chr9:94794280-94877666	protein_coding	3658	17.6058	17.2239	19.1238	16.9972
ENSG00000090060	PAPOLA	chr14:96967769-97033448	protein_coding	12766	16.8681	15.3163	16.1576	17.2979
ENSG00000090061	CCNK	chr14:99947505-100001381	protein_coding	8220	2.1363	2.2532	1.6577	1.6899
ENSG00000090097	PCBP4	chr3:51991469-52002426	protein_coding	3686	47.5295	48.4572	49.7756	50.6042
ENSG00000090104	RGS1	chr1:192544856-192549161	protein_coding	4117	0	0	0	0
ENSG00000090238	YPEL3	chr16:30103634-30108236	protein_coding	3181	1.1524	1.2761	1.5765	1.024
ENSG00000090263	MRPS33	chr7:140705853-140715028	protein_coding	1818	9.3354	12.6065	9.8914	9.6962
ENSG00000090266	NDUFB2	chr7:140390576-140422590	protein_coding	4447	3.5722	4.9065	3.7476	2.9299
ENSG00000090273	NUDC	chr1:27226728-27273353	protein_coding	2856	31.725	27.4203	33.575	36.3284
ENSG00000090316	MAEA	chr4:1283638-1333935	protein_coding	9857	5.6383	6.4949	6.3004	5.9773
ENSG00000090339	ICAM1	chr19:10381510-10397291	protein_coding	3706	0.0244	0.0228	0.0137	0.0259
ENSG00000090372	STRN4	chr19:47222763-47250251	protein_coding	7641	12.7286	12.1527	12.6887	13.1272
ENSG00000090376	IRAK3	chr12:66582658-66648402	protein_coding	10004	0.0362	0.0254	0.1468	0.1149
ENSG00000090382	LYZ	chr12:69742120-69748014	protein_coding	1764	0.077	0.0479	0.0287	0
ENSG00000090402	SI	chr3:164696685-164796283	protein_coding	6138	0	0	0	0.0312
ENSG00000090432	MUL1	chr1:20825942-20834654	protein_coding	2436	6.3354	8.5404	7.1533	8.2588
ENSG00000090447	TFAP4	chr16:4307186-4323076	protein_coding	7867	4.3549	4.6548	5.1898	5.4313
ENSG00000090470	PDCD7	chr15:65409716-65426174	protein_coding	3263	9.8339	9.8489	8.8022	11.245
ENSG00000090487	SPG21	chr15:65255361-65282648	protein_coding	3984	25.1736	28.2964	25.0097	27.7019
ENSG00000090512	FETUB	chr3:186353757-186370930	protein_coding	2024	0.0224	0	0	0
ENSG00000090520	DNAJB11	chr3:186285191-186315061	protein_coding	6040	11.7341	11.7335	10.6762	12.5463
ENSG00000090530	LEPREL1	chr3:189674516-189840226	protein_coding	5605	3.8677	4.1795	1.8075	3.4868
ENSG00000090534	THPO	chr3:184089722-184095932	protein_coding	1915	0.3309	0.3533	0.5026	0.6504
ENSG00000090539	CHRD	chr3:184097860-184108524	protein_coding	6620	0.4854	0.6515	0.4132	0.8104
ENSG00000090554	FLT3LG	chr19:49977463-49989488	protein_coding	2902	0.0156	0	0.0698	0.1321
ENSG00000090565	RAB11FIP3	chr16:475618-573011	protein_coding	6317	5.5525	5.9977	5.525	4.4436
ENSG00000090581	GNPTG	chr16:1401923-1413352	protein_coding	3672	3.4141	4.6753	3.9867	3.757
ENSG00000090612	ZNF268	chr12:133707569-133783698	protein_coding	6905	9.4055	9.6757	7.182	6.8401
ENSG00000090615	GOLGA3	chr12:133345494-133405444	protein_coding	10550	11.6899	13.0343	10.6304	11.0604
ENSG00000090621	PABPC4	chr1:40026487-40042462	protein_coding	6782	22.1552	24.3911	20.9358	21.7116
ENSG00000090659	CD209	chr19:7804878-7812464	protein_coding	4428	0	0	0	0
ENSG00000090661	CERS4	chr19:8271619-8327305	protein_coding	4059	4.0921	4.7505	5.4412	4.1776
ENSG00000090674	MCOLN1	chr19:7587511-7598895	protein_coding	3956	1.5673	1.6675	1.9975	1.3804
ENSG00000090686	USP48	chr1:22004790-22110099	protein_coding	9497	11.7279	10.7394	9.4195	11.0359
ENSG00000090776	EFNB1	chrX:68048839-68061990	protein_coding	3314	17.7399	20.594	22.8361	18.2701
ENSG00000090857	PDPR	chr16:70147528-70195203	protein_coding	9148	7.8118	8.7825	8.1564	6.7233
ENSG00000090861	AARS	chr16:70286197-70323446	protein_coding	4498	31.7148	34.6142	33.8414	20.7664
ENSG00000090863	GLG1	chr16:74485855-74641012	protein_coding	9550	24.4488	25.8583	24.0121	19.341
ENSG00000090889	KIF4A	chrX:69509878-69640682	protein_coding	4723	18.9446	21.0039	19.0051	19.2903
ENSG00000090905	TNRC6A	chr16:24741015-24838953	protein_coding	12522	12.6717	12.5417	10.7969	12.7385
ENSG00000090920	FCGBP	chr19:40353962-40440533	protein_coding	16564	0.071	0.1583	0.0581	0.081
ENSG00000090924	PLEKHG2	chr19:39903224-39919054	protein_coding	9199	10.1104	9.4877	8.6729	9.4459
ENSG00000090932	DLL3	chr19:39989534-39999121	protein_coding	2618	0.242	0.2907	0.5805	0.3659
ENSG00000090971	NAT14	chr19:55996370-55998935	protein_coding	2163	6.047	5.3174	6.5339	4.0305
ENSG00000090975	PITPNM2	chr12:123468026-123634562	protein_coding	9165	0.2765	0.4891	0.3206	0.3972
ENSG00000090989	EXOC1	chr4:56719781-56771200	protein_coding	5347	8.2187	8.3353	7.2473	7.1847
ENSG00000091009	RBM27	chr5:145583112-145718814	protein_coding	6900	17.8081	15.5904	17.5384	20.5211
ENSG00000091010	POU4F3	chr5:145718586-145720083	protein_coding	1182	0	0	0.0857	0.0811
ENSG00000091039	OSBPL8	chr12:76745576-76953589	protein_coding	9198	16.0603	16.6052	16.808	15.4046
ENSG00000091073	DTX2	chr7:76090992-76135312	protein_coding	5042	1.0592	1.5599	1.286	1.8051
ENSG00000091106	NLRC4	chr2:32449521-32490923	protein_coding	3624	0	0	0	0.0529
ENSG00000091127	PUS7	chr7:105080107-105162714	protein_coding	4421	11.3734	11.0567	11.2516	14.3454
ENSG00000091128	LAMB4	chr7:107663992-107770801	protein_coding	7016	0.0065	0.0241	0.0217	0
ENSG00000091129	NRCAM	chr7:107788067-108097161	protein_coding	7939	3.6713	3.9201	4.409	3.8736
ENSG00000091136	LAMB1	chr7:107564243-107643700	protein_coding	8140	40.3264	44.2074	38.3959	24.9039
ENSG00000091137	SLC26A4	chr7:107301079-107358254	protein_coding	5800	0.0078	0.0292	0.0524	0.0661
ENSG00000091138	SLC26A3	chr7:107405911-107443670	protein_coding	3382	0	0	0	0
ENSG00000091140	DLD	chr7:107531414-107572175	protein_coding	5299	15.5956	14.1244	15.5914	15.1505
ENSG00000091157	WDR7	chr18:54318573-54698828	protein_coding	10685	4.6931	5.0576	4.3378	4.6086
ENSG00000091164	TXNL1	chr18:54264438-54318831	protein_coding	11298	7.9155	7.695	7.6489	9.3191
ENSG00000091181	IL5RA	chr3:3111232-3168297	protein_coding	3377	0.0804	0.025	0.03	0.1135
ENSG00000091262	ABCC6	chr16:16242784-16317379	protein_coding	7559	0.0659	0.0783	0.1273	0.0887
ENSG00000091317	CMTM6	chr3:32522803-32544900	protein_coding	4413	10.5633	10.7702	10.3882	9.2047
ENSG00000091409	ITGA6	chr2:173292081-173371181	protein_coding	6704	3.632	3.5196	3.5664	4.3157
ENSG00000091428	RAPGEF4	chr2:173600001-173917621	protein_coding	7161	0.3666	0.6259	0.2476	0.107
ENSG00000091436	MLTK	chr2:173940162-174132738	protein_coding	13799	6.4087	5.6568	5.7964	5.8319
ENSG00000091482	SMPX	chrX:21724089-21776281	protein_coding	1040	31.6806	28.6239	46.9534	69.0883
ENSG00000091483	FH	chr1:241660902-241683061	protein_coding	2142	24.0024	28.4271	27.3141	29.832
ENSG00000091490	SEL1L3	chr4:25749054-25865382	protein_coding	7483	3.399	3.6844	3.2899	2.1893
ENSG00000091513	TF	chr3:133464799-133497850	protein_coding	8565	0.1004	0.1086	0.0887	0.0559
ENSG00000091527	CDV3	chr3:133292573-133309105	protein_coding	4367	66.8351	62.0482	65.607	75.0931
ENSG00000091536	MYO15A	chr17:18012019-18083116	protein_coding	19117	0.0497	0.0531	0.0556	0.0802
ENSG00000091542	ALKBH5	chr17:18086391-18113268	protein_coding	3190	27.8784	28.42	37.1577	28.5906
ENSG00000091583	APOH	chr17:64208150-64252643	protein_coding	1332	0.034	0	0	0
ENSG00000091592	NLRP1	chr17:5402746-5522744	protein_coding	12811	1.3036	1.3599	1.7754	1.3984
ENSG00000091622	PITPNM3	chr17:6354583-6459814	protein_coding	10609	0.5588	0.6377	0.8595	0.596
ENSG00000091640	SPAG7	chr17:4862520-4871167	protein_coding	2831	24.2517	23.1516	25.3723	26.3617
ENSG00000091651	ORC6	chr16:46723554-46732306	protein_coding	4309	9.915	11.089	11.6499	11.2055
ENSG00000091656	ZFHX4	chr8:77593453-77779521	protein_coding	15696	16.0866	19.9034	13.6868	11.4443
ENSG00000091664	SLC17A6	chr11:22359642-22401049	protein_coding	4219	0.0751	0.2405	0.0961	0.0908
ENSG00000091704	CPA1	chr7:130020179-130027955	protein_coding	2921	0.2169	0.1158	0.2428	0.1312
ENSG00000091732	ZC3HC1	chr7:129658125-129691291	protein_coding	3011	7.2148	8.8475	8.3949	8.368
ENSG00000091831	ESR1	chr6:151977825-152450754	protein_coding	13629	0.0066	0.0062	0.0372	0.0633
ENSG00000091844	RGS17	chr6:153325593-153452384	protein_coding	7899	0.2521	0.1713	0.3527	0.3639
ENSG00000091879	ANGPT2	chr8:6357171-6420930	protein_coding	6784	0.04	0.0249	0.0075	0.0424
ENSG00000091947	TMEM101	chr17:42088555-42101314	protein_coding	3029	6.4548	6.3379	6.0539	5.5666
ENSG00000091972	CD200	chr3:112051193-112081659	protein_coding	2991	2.1941	2.2337	3.6243	3.7475
ENSG00000091986	CCDC80	chr3:112323406-112368377	protein_coding	5305	29.4327	23.8169	23.6518	14.2304
ENSG00000092009	CMA1	chr14:24974558-24977471	protein_coding	937	0	0	0	0
ENSG00000092010	PSME1	chr14:24605366-24608176	protein_coding	1781	28.2069	28.8234	32.0541	36.7933
ENSG00000092020	PPP2R3C	chr14:35554672-35591723	protein_coding	3863	8.4822	7.7937	7.3563	7.068
ENSG00000092036	HAUS4	chr14:23415436-23426370	protein_coding	2539	5.3832	5.5959	5.8655	3.3204
ENSG00000092051	JPH4	chr14:24037243-24048009	protein_coding	5307	0.2985	0.1912	0.21	0.2166
ENSG00000092054	MYH7	chr14:23881946-23904927	protein_coding	6087	0.2305	0.0834	0.1082	0.1889
ENSG00000092067	CEBPE	chr14:23586512-23588825	protein_coding	1554	0.0291	0	0	0
ENSG00000092068	SLC7A8	chr14:23594503-23652883	protein_coding	5942	0.1599	0.1566	0.1961	0.1129
ENSG00000092094	OSGEP	chr14:20914569-20923264	protein_coding	5041	9.2024	8.9419	8.5715	7.4498
ENSG00000092096	SLC22A17	chr14:23815514-23822121	protein_coding	4278	2.539	2.8072	3.943	3.0008
ENSG00000092098	RNF31	chr14:24615891-24629870	protein_coding	4982	4.5149	4.6173	5.2872	5.0382
ENSG00000092108	SCFD1	chr14:31091317-31205018	protein_coding	6571	10.3451	10.7853	9.798	9.8995
ENSG00000092140	G2E3	chr14:31028328-31089269	protein_coding	10025	6.9433	6.6982	6.589	8.228
ENSG00000092148	HECTD1	chr14:31569317-31677010	protein_coding	12417	33.6747	35.8729	30.8777	32.4279
ENSG00000092199	HNRNPC	chr14:21677294-21737653	protein_coding	7315	137.111	128.018	129.411	135.302
ENSG00000092200	RPGRIP1	chr14:21756097-21819460	protein_coding	5494	0	0	0	0.0523
ENSG00000092201	SUPT16H	chr14:21819630-21852425	protein_coding	7151	70.156	63.3304	66.0338	65.2571
ENSG00000092203	TOX4	chr14:21944755-21967319	protein_coding	7076	11.1418	11.2108	12.356	11.8331
ENSG00000092208	GEMIN2	chr14:39583426-39606177	protein_coding	2532	4.3614	5.0769	4.5214	4.6917
ENSG00000092295	TGM1	chr14:24718319-24733638	protein_coding	3735	0.3756	0.1359	0.1627	0.2308
ENSG00000092330	TINF2	chr14:24708848-24711880	protein_coding	2712	10.7805	10.7584	11.6552	10.7742
ENSG00000092345	DAZL	chr3:16628298-16711813	protein_coding	3631	0	0	0.014	0
ENSG00000092377	TBL1Y	chrY:6778726-6959724	protein_coding	2407	0	0	0	0
ENSG00000092421	SEMA6A	chr5:115779311-115910630	protein_coding	10956	22.6497	22.8795	19.035	20.0594
ENSG00000092439	TRPM7	chr15:50844669-50979012	protein_coding	9198	12.3404	12.4953	11.2402	12.6445
ENSG00000092445	TYRO3	chr15:41849872-41871536	protein_coding	6697	3.0411	3.599	3.2373	2.6322
ENSG00000092470	WDR76	chr15:44119160-44160617	protein_coding	4078	11.6752	10.5973	13.0427	9.9843
ENSG00000092529	CAPN3	chr15:42640300-42704516	protein_coding	5129	0.1235	0.1814	0.0988	0.0747
ENSG00000092531	SNAP23	chr15:42783430-42837547	protein_coding	5893	9.5155	8.8976	9.0428	7.1531
ENSG00000092607	TBX15	chr1:119425668-119532179	protein_coding	3806	13.2231	13.4211	10.4212	12.2836
ENSG00000092621	PHGDH	chr1:120202420-120286838	protein_coding	5622	53.5578	54.7408	54.4214	30.9628
ENSG00000092758	COL9A3	chr20:61447595-61472511	protein_coding	4831	2.061	2.6959	1.5414	1.7451
ENSG00000092820	EZR	chr6:159186772-159240444	protein_coding	3336	29.8329	28.5705	31.1432	30.8429
[truncated: 55,774 more rows]

## Sheet: PAX7 Up Only Vs OCT4
Column #	Column ID	p-value(Attribute)	p-value(KO vs. OCT4)	Ratio(KO vs. OCT4)	Fold-Change(KO vs. OCT4)	Fold-Change(KO vs. OCT4) (Description)	Fold Change(KO vs. OCT4) 95% lower limit	Fold Change(KO vs. OCT4) 95% upper limit	T(KO vs. OCT4)	F(Attribute)	SS(Attribute)	SS(Error)	F(Error)	Column #	p-value(Attribute)	p-value(PAX7 vs. OCT4)	Ratio(PAX7 vs. OCT4)	Fold-Change(PAX7 vs. OCT4)	Fold-Change(PAX7 vs. OCT4) (Description)	Fold Change(PAX7 vs. OCT4) 95% lower limit	Fold Change(PAX7 vs. OCT4) 95% upper limit	T(PAX7 vs. OCT4)	F(Attribute)	SS(Attribute)	SS(Error)	F(Error)
0	ENSG00000005436	0	0	0	0		0	0	0	0	0	0	0	99	0.00747208	0.0021317	4.0904	4.0904	PAX7 up vs OCT4	1.84348	9.07597	3.81836	7.30626	9.93421	8.83794	1
0	ENSG00000012174	0	0	0	0		0	0	0	0	0	0	0	320	0.000224912	6.38343e-05	2.34632	2.34632	PAX7 up vs OCT4	1.70588	3.2272	5.78	17.1669	3.73397	1.41381	1
0	ENSG00000025039	0	0	0	0		0	0	0	0	0	0	0	451	2.59388e-06	5.00875e-06	118.799	118.799	PAX7 up vs OCT4	29.5903	476.952	7.42527	40.5225	167.591	26.8824	1
0	ENSG00000048540	0	0	0	0		0	0	0	0	0	0	0	654	0.00133241	0.00035923	2.33139	2.33139	PAX7 up vs OCT4	1.59032	3.41781	4.78044	11.5002	3.60228	2.03604	1
0	ENSG00000053328	0	0	0	0		0	0	0	0	0	0	0	719	0.000659567	0.000255935	2.24821	2.24821	PAX7 up vs OCT4	1.58095	3.1971	4.97057	13.5566	3.59784	1.72506	1
0	ENSG00000064989	0	0	0	0		0	0	0	0	0	0	0	918	0.0135718	0.00451252	10.9925	10.9925	PAX7 up vs OCT4	2.42423	49.8448	3.42586	6.09505	29.8155	31.7965	1
0	ENSG00000065413	0	0	0	0		0	0	0	0	0	0	0	939	0.00024901	6.21611e-05	2.70518	2.70518	PAX7 up vs OCT4	1.86682	3.92004	5.79602	16.7992	4.94782	1.91442	1
0	ENSG00000067064	0	0	0	0		0	0	0	0	0	0	0	1007	0.0163681	0.00486399	16369.1	16369.1	PAX7 up vs OCT4	33.5738	7980900	3.38682	5.73722	470.472	533.023	1
0	ENSG00000067082	0	0	0	0		0	0	0	0	0	0	0	1009	0.0200596	0.00636687	132441	132441	PAX7 up vs OCT4	51.7548	338919000	3.24684	5.36027	706.595	856.835	1
0	ENSG00000067177	0	0	0	0		0	0	0	0	0	0	0	1013	0.00667626	0.0044521	2.65331	2.65331	PAX7 up vs OCT4	1.43579	4.90325	3.43288	7.54755	6.09267	5.24705	1
0	ENSG00000067191	0	0	0	0		0	0	0	0	0	0	0	1015	0.00100044	0.000456113	2.01915	2.01915	PAX7 up vs OCT4	1.45657	2.79903	4.64807	12.3115	2.81104	1.48413	1
0	ENSG00000069702	0	0	0	0		0	0	0	0	0	0	0	1095	0.000264089	7.59826e-05	13.151	13.151	PAX7 up vs OCT4	4.93205	35.0663	5.67548	16.5894	34.1567	13.3831	1
0	ENSG00000070182	0	0	0	0		0	0	0	0	0	0	0	1115	0.00408278	0.00218487	2.03598	2.03598	PAX7 up vs OCT4	1.35981	3.04838	3.80539	8.6516	3.01719	2.26683	1
0	ENSG00000071243	0	0	0	0		0	0	0	0	0	0	0	1165	0.0234895	0.00774351	6.84314	6.84314	PAX7 up vs OCT4	1.82612	25.6438	3.14516	5.07572	18.9615	24.2823	1
0	ENSG00000072954	0	0	0	0		0	0	0	0	0	0	0	1228	0.00321758	0.00180509	6.58386	6.58386	PAX7 up vs OCT4	2.32168	18.6706	3.90614	9.21703	21.4355	15.1167	1
0	ENSG00000075884	0	0	0	0		0	0	0	0	0	0	0	1342	8.39233e-05	3.53284e-05	7.18971	7.18971	PAX7 up vs OCT4	3.59232	14.3896	6.14201	21.0428	21.6857	6.69858	1
0	ENSG00000077522	0	0	0	0		0	0	0	0	0	0	0	1406	0.014622	0.00439009	8984.31	8984.31	PAX7 up vs OCT4	29.5646	2730220	3.44018	5.95145	416.334	454.708	1
0	ENSG00000078596	0	0	0	0		0	0	0	0	0	0	0	1447	0.00566728	0.00179078	262138000000	262138000000	PAX7 up vs OCT4	128848	5.33311e+17	3.91035	7.90615	3570.89	2935.79	1
0	ENSG00000079156	0	0	0	0		0	0	0	0	0	0	0	1468	0.000839784	0.000475368	2.53793	2.53793	PAX7 up vs OCT4	1.64269	3.92105	4.62527	12.8249	5.19511	2.63301	1
0	ENSG00000079393	0	0	0	0		0	0	0	0	0	0	0	1481	0.00156041	0.000460676	2.14448	2.14448	PAX7 up vs OCT4	1.50364	3.05842	4.64258	11.068	2.98587	1.75354	1
0	ENSG00000080573	0	0	0	0		0	0	0	0	0	0	0	1516	0.0186887	0.00867078	50.8585	50.8585	PAX7 up vs OCT4	3.25066	795.712	3.0864	5.49014	88.8881	105.238	1
0	ENSG00000081189	0	0	0	0		0	0	0	0	0	0	0	1547	0.00974623	0.00308682	12208.7	12208.7	PAX7 up vs OCT4	44.7199	3333030	3.62402	6.75327	454.878	437.819	1
0	ENSG00000081248	0	0	0	0		0	0	0	0	0	0	0	1549	8.40272e-05	4.41051e-05	10.7076	10.7076	PAX7 up vs OCT4	4.56292	25.1269	6.00492	21.0376	32.7654	10.1236	1
0	ENSG00000081277	0	0	0	0		0	0	0	0	0	0	0	1550	0.00233986	0.00071969	2.03412	2.03412	PAX7 up vs OCT4	1.4352	2.88298	4.39847	10.0064	2.60534	1.69238	1
0	ENSG00000081842	0	0	0	0		0	0	0	0	0	0	0	1564	2.66171e-08	5.01944e-08	2.60898	2.60898	PAX7 up vs OCT4	2.16658	3.1417	11.1498	88.6203	6.54924	0.480364	1
0	ENSG00000082293	0	0	0	0		0	0	0	0	0	0	0	1582	0.000654212	0.000193245	814.705	814.705	PAX7 up vs OCT4	48.4346	13703.9	5.13021	13.5818	231.63	110.854	1
0	ENSG00000087074	0	0	0	0		0	0	0	0	0	0	0	1733	0.00857152	0.00247663	598973000	598973000	PAX7 up vs OCT4	5087.65	70517600000000	3.73947	7.01775	2048.01	1896.91	1
0	ENSG00000087303	0	0	0	0		0	0	0	0	0	0	0	1760	0.00539077	0.00149989	4.41407	4.41407	PAX7 up vs OCT4	1.98125	9.83417	4.0043	8.01744	11.013	8.92863	1
0	ENSG00000088881	0	0	0	0		0	0	0	0	0	0	0	1814	0.000791162	0.000206502	2.57535	2.57535	PAX7 up vs OCT4	1.72402	3.84706	5.09233	13.0031	4.48303	2.24098	1
0	ENSG00000090006	0	0	0	0		0	0	0	0	0	0	0	1878	0.0293528	0.0105677	799.682	799.682	PAX7 up vs OCT4	6.32328	101133	2.98356	4.6856	234.956	325.938	1
0	ENSG00000090621	0	0	0	0		0	0	0	0	0	0	0	1910	0.00937141	0.00288177	14.6699	14.6699	PAX7 up vs OCT4	3.00557	71.6028	3.66	6.83348	36.7635	34.9695	1
0	ENSG00000091592	0	0	0	0		0	0	0	0	0	0	0	1955	0.000234274	6.05171e-05	2.56077	2.56077	PAX7 up vs OCT4	1.80543	3.63211	5.8122	17.0189	4.4502	1.69965	1
0	ENSG00000093183	0	0	0	0		0	0	0	0	0	0	0	2020	0.0278249	0.00860831	3.51845	3.51845	PAX7 up vs OCT4	1.46013	8.47839	3.09016	4.77798	7.91132	10.7626	1
0	ENSG00000097096	0	0	0	0		0	0	0	0	0	0	0	2095	0.00135894	0.00128039	9.84506	9.84506	PAX7 up vs OCT4	2.94038	32.9635	4.08852	11.4457	35.7782	20.3185	1
0	ENSG00000099953	0	0	0	0		0	0	0	0	0	0	0	2160	0.00109198	0.000297622	2.802	2.802	PAX7 up vs OCT4	1.77665	4.4191	4.88562	12.0598	5.35854	2.88816	1
0	ENSG00000100300	0	0	0	0		0	0	0	0	0	0	0	2274	0.00407201	0.00136475	46.7383	46.7383	PAX7 up vs OCT4	6.02588	362.515	4.05451	8.65776	77.7701	58.3875	1
0	ENSG00000100441	0	0	0	0		0	0	0	0	0	0	0	2332	0.00947289	0.00308347	16.489	16.489	PAX7 up vs OCT4	3.10247	87.6359	3.62458	6.8114	40.6876	38.8274	1
0	ENSG00000100564	0	0	0	0		0	0	0	0	0	0	0	2358	0.00453368	0.00129484	2.08059	2.08059	PAX7 up vs OCT4	1.41192	3.06593	4.08254	8.40937	2.70575	2.0914	1
0	ENSG00000100612	0	0	0	0		0	0	0	0	0	0	0	2377	0.0263664	0.00903703	3.22014	3.22014	PAX7 up vs OCT4	1.41217	7.34282	3.0649	4.87178	7.08581	9.45399	1
0	ENSG00000101596	0	0	0	0		0	0	0	0	0	0	0	2574	0.0246326	0.00950597	11.106	11.106	PAX7 up vs OCT4	2.00537	61.5063	3.03861	4.99141	31.3033	40.7643	1
0	ENSG00000101605	0	0	0	0		0	0	0	0	0	0	0	2575	0.0215673	0.00994813	8.6041	8.6041	PAX7 up vs OCT4	1.84055	40.2221	3.01498	5.22877	26.6196	33.0915	1
0	ENSG00000101986	0	0	0	0		0	0	0	0	0	0	0	2625	0.0094745	0.00435347	2.13057	2.13057	PAX7 up vs OCT4	1.32577	3.42393	3.44454	6.81105	3.28121	3.13136	1
0	ENSG00000101997	0	0	0	0		0	0	0	0	0	0	0	2626	0.00193958	0.000518487	2.67209	2.67209	PAX7 up vs OCT4	1.68034	4.24917	4.57751	10.4898	4.83152	2.99384	1
0	ENSG00000102218	0	0	0	0		0	0	0	0	0	0	0	2666	0.0293116	0.0118209	6.27729	6.27729	PAX7 up vs OCT4	1.61658	24.3752	2.92524	4.68803	18.4691	25.6076	1
0	ENSG00000102401	0	0	0	0		0	0	0	0	0	0	0	2694	0.00483102	0.00135705	724.077	724.077	PAX7 up vs OCT4	21.7339	24123.1	4.05753	8.26437	217.458	171.032	1
0	ENSG00000102554	0	0	0	0		0	0	0	0	0	0	0	2706	0.0105688	0.00490065	5.62031	5.62031	PAX7 up vs OCT4	1.86618	16.9265	3.38291	6.5891	17.144	16.9122	1
0	ENSG00000104093	0	0	0	0		0	0	0	0	0	0	0	2896	0.00761657	0.00225614	4.44698	4.44698	PAX7 up vs OCT4	1.89893	10.4141	3.78849	7.26564	11.2616	10.0749	1
0	ENSG00000104435	0	0	0	0		0	0	0	0	0	0	0	2945	0.0345592	0.0123668	14.7021	14.7021	PAX7 up vs OCT4	1.98725	108.769	2.90173	4.40811	37.7907	55.7244	1
0	ENSG00000104691	0	0	0	0		0	0	0	0	0	0	0	2970	0.031808	0.0114302	3.03895	3.03895	PAX7 up vs OCT4	1.34381	6.87241	2.94274	4.54822	6.48274	9.26467	1
0	ENSG00000104960	0	0	0	0		0	0	0	0	0	0	0	3035	0.00942621	0.00401027	52.5448	52.5448	PAX7 up vs OCT4	4.51522	611.476	3.48734	6.82152	87.9508	83.8053	1
0	ENSG00000105223	0	0	0	0		0	0	0	0	0	0	0	3079	0.0188787	0.00877787	395.377	395.377	PAX7 up vs OCT4	5.96257	26217.3	3.08002	5.4715	206.047	244.779	1
0	ENSG00000105520	0	0	0	0		0	0	0	0	0	0	0	3151	0.0214671	0.00856161	2.35753	2.35753	PAX7 up vs OCT4	1.29511	4.29149	3.09298	5.23717	4.02268	4.99266	1
0	ENSG00000106701	0	0	0	0		0	0	0	0	0	0	0	3378	0.000927192	0.000335376	2.23228	2.23228	PAX7 up vs OCT4	1.55738	3.19964	4.81876	12.5328	3.47715	1.80339	1
0	ENSG00000107262	0	0	0	0		0	0	0	0	0	0	0	3427	0.00481587	0.00159567	3.19901	3.19901	PAX7 up vs OCT4	1.69941	6.02187	3.97144	8.27151	7.08466	5.56734	1
0	ENSG00000107331	0	0	0	0		0	0	0	0	0	0	0	3434	0.0210633	0.0065737	3.07118	3.07118	PAX7 up vs OCT4	1.4501	6.50449	3.23023	5.27152	6.35466	7.83556	1
0	ENSG00000107518	0	0	0	0		0	0	0	0	0	0	0	3445	0.000103208	9.45795e-05	4.15933	4.15933	PAX7 up vs OCT4	2.38707	7.24738	5.5454	20.1801	13.3197	4.29025	1
0	ENSG00000107874	0	0	0	0		0	0	0	0	0	0	0	3491	0.0063681	0.00195534	2077.91	2077.91	PAX7 up vs OCT4	29.0193	148787	3.8639	7.65005	298.737	253.827	1
0	ENSG00000108515	0	0	0	0		0	0	0	0	0	0	0	3575	0.0047406	0.00136482	84768.1	84768.1	PAX7 up vs OCT4	200.588	35822900	4.05449	8.30735	650.121	508.68	1
0	ENSG00000108590	0	0	0	0		0	0	0	0	0	0	0	3590	0.00365477	0.00101818	4.14836	4.14836	PAX7 up vs OCT4	1.9994	8.60704	4.21116	8.91196	10.1624	7.412	1
0	ENSG00000109046	0	0	0	0		0	0	0	0	0	0	0	3654	0.0263143	0.00914417	30710900000000	30710900000000	PAX7 up vs OCT4	9150.15	1.03076e+23	3.05878	4.87525	5020.78	6694.04	1
0	ENSG00000109184	0	0	0	0		0	0	0	0	0	0	0	3681	0.0223056	0.00702591	5.94788	5.94788	PAX7 up vs OCT4	1.78185	19.8543	3.19567	5.16819	16.074	20.2162	1
0	ENSG00000109189	0	0	0	0		0	0	0	0	0	0	0	3682	0.000988577	0.000380498	60.5435	60.5435	PAX7 up vs OCT4	9.36033	391.601	4.74844	12.346	92.1074	48.4932	1
0	ENSG00000109618	0	0	0	0		0	0	0	0	0	0	0	3717	0.00496574	0.00139823	3.15009	3.15009	PAX7 up vs OCT4	1.7059	5.8169	4.04162	8.20203	6.60472	5.23415	1
0	ENSG00000110002	0	0	0	0		0	0	0	0	0	0	0	3761	0.000278722	0.00618245	4.64147	4.64147	PAX7 up vs OCT4	1.67941	12.8279	3.26211	16.3987	36.2774	14.3794	1
0	ENSG00000110723	0	0	0	0		0	0	0	0	0	0	0	3841	0.00123578	0.00108417	2.10214	2.10214	PAX7 up vs OCT4	1.43152	3.08692	4.17747	11.7099	3.70035	2.05401	1
0	ENSG00000111049	0	0	0	0		0	0	0	0	0	0	0	3876	0.00016898	6.95393e-05	20717.2	20717.2	PAX7 up vs OCT4	488.132	879276	5.72853	18.2313	548.254	195.469	1
0	ENSG00000111799	0	0	0	0		0	0	0	0	0	0	0	3993	0.000448866	0.000180635	7.67274e+16	7.67274e+16	PAX7 up vs OCT4	6725300000	8.75366e+23	5.16884	14.78	8354.32	3674.08	1
0	ENSG00000111850	0	0	0	0		0	0	0	0	0	0	0	4004	0.00868157	0.0053205	3.60359	3.60359	PAX7 up vs OCT4	1.5727	8.25703	3.34015	6.99125	10.2882	9.56531	1
0	ENSG00000111912	0	0	0	0		0	0	0	0	0	0	0	4018	7.46756e-05	4.81633e-05	75.677	75.677	PAX7 up vs OCT4	15.7343	363.981	5.95098	21.542	113.754	34.3238	1
0	ENSG00000112175	0	0	0	0		0	0	0	0	0	0	0	4049	0.000205463	5.61244e-05	3.51374	3.51374	PAX7 up vs OCT4	2.2105	5.58535	5.85782	17.4986	8.04582	2.98869	1
0	ENSG00000112406	0	0	0	0		0	0	0	0	0	0	0	4097	0.00021921	6.41074e-05	17.6989	17.6989	PAX7 up vs OCT4	6.04365	51.8317	5.77743	17.2606	42.6581	16.0642	1
0	ENSG00000112981	0	0	0	0		0	0	0	0	0	0	0	4162	0.00686957	0.00221534	2.212	2.212	PAX7 up vs OCT4	1.40822	3.47456	3.79809	7.486	3.26765	2.83726	1
0	ENSG00000113638	0	0	0	0		0	0	0	0	0	0	0	4244	0.0067725	0.00218445	44.8616	44.8616	PAX7 up vs OCT4	5.17736	388.724	3.80549	7.51665	75.0205	64.8737	1
0	ENSG00000114021	0	0	0	0		0	0	0	0	0	0	0	4281	0.0110532	0.00323305	5.28181	5.28181	PAX7 up vs OCT4	1.94543	14.34	3.59981	6.49917	13.8783	13.8801	1
0	ENSG00000114315	0	0	0	0		0	0	0	0	0	0	0	4306	0.0131851	0.00446629	5382360000000	5382360000000	PAX7 up vs OCT4	51913.9	5.58034e+20	3.43122	6.15119	4485.46	4739.81	1
0	ENSG00000114544	0	0	0	0		0	0	0	0	0	0	0	4334	0.0235495	0.00720093	2.05353	2.05353	PAX7 up vs OCT4	1.26006	3.34665	3.18289	5.07118	2.58936	3.31892	1
0	ENSG00000115073	0	0	0	0		0	0	0	0	0	0	0	4393	0.00957351	0.00398712	378.502	378.502	PAX7 up vs OCT4	9.60202	14920.2	3.49035	6.78978	196.213	187.839	1
0	ENSG00000115084	0	0	0	0		0	0	0	0	0	0	0	4394	0.000993478	0.000264952	5.80307	5.80307	PAX7 up vs OCT4	2.69425	12.4991	4.95103	12.3317	15.54	8.19108	1
0	ENSG00000115232	0	0	0	0		0	0	0	0	0	0	0	4418	9.03759e-05	2.80642e-05	336.571	336.571	PAX7 up vs OCT4	45.5584	2486.48	6.28597	20.7307	177.471	55.6452	1
0	ENSG00000115310	0	0	0	0		0	0	0	0	0	0	0	4441	0.00590761	0.00899924	64.9245	64.9245	PAX7 up vs OCT4	3.43398	1227.5	3.06708	7.8144	144.537	120.225	1
0	ENSG00000115361	0	0	0	0		0	0	0	0	0	0	0	4449	0.000628492	0.000458536	440.312	440.312	PAX7 up vs OCT4	25.9536	7470.05	4.64515	13.7061	235.17	111.527	1
0	ENSG00000115380	0	0	0	0		0	0	0	0	0	0	0	4454	0.0279821	0.00991506	75.1469	75.1469	PAX7 up vs OCT4	3.40806	1656.97	3.01671	4.76821	97.6639	133.135	1
0	ENSG00000115525	0	0	0	0		0	0	0	0	0	0	0	4479	4.06977e-06	9.7258e-07	2.83016	2.83016	PAX7 up vs OCT4	2.18092	3.67268	8.62472	37.3743	5.43273	0.944839	1
0	ENSG00000115593	0	0	0	0		0	0	0	0	0	0	0	4490	0.00817447	0.00245809	16.6238	16.6238	PAX7 up vs OCT4	3.28271	84.1834	3.74342	7.11675	40.0872	36.6132	1
0	ENSG00000115694	0	0	0	0		0	0	0	0	0	0	0	4508	0.00465028	0.00130111	8.27447	8.27447	PAX7 up vs OCT4	2.70265	25.3332	4.07996	8.35124	22.3821	17.4206	1
0	ENSG00000116191	0	0	0	0		0	0	0	0	0	0	0	4579	0.000498541	0.000134006	7324.55	7324.55	PAX7 up vs OCT4	200.255	267903	5.3412	14.4392	400.438	180.263	1
0	ENSG00000116717	0	0	0	0		0	0	0	0	0	0	0	4641	0.000129313	6.40145e-05	2111.25	2111.25	PAX7 up vs OCT4	120.663	36940.8	5.7783	19.2705	337.891	113.972	1
0	ENSG00000116990	0	0	0	0		0	0	0	0	0	0	0	4688	0.038165	0.0122619	8.67572	8.67572	PAX7 up vs OCT4	1.74098	43.2332	2.90617	4.24283	23.4274	35.8907	1
0	ENSG00000117155	0	0	0	0		0	0	0	0	0	0	0	4714	0.000181303	0.000191659	6.04144	6.04144	PAX7 up vs OCT4	2.83464	12.876	5.13492	17.9649	22.021	7.96758	1
0	ENSG00000117318	0	0	0	0		0	0	0	0	0	0	0	4730	0.00720229	0.00359639	106526000000000	106526000000000	PAX7 up vs OCT4	299866	3.78429e+22	3.54416	7.3846	6127.43	5393.43	1
0	ENSG00000118292	0	0	0	0		0	0	0	0	0	0	0	4833	0.0113071	0.00332999	787.826	787.826	PAX7 up vs OCT4	14.1479	43870	3.58436	6.45381	223.224	224.821	1
0	ENSG00000119401	0	0	0	0		0	0	0	0	0	0	0	4933	0.0121125	0.00357353	2.05888	2.05888	PAX7 up vs OCT4	1.32628	3.19615	3.54749	6.31742	2.6155	2.69109	1
0	ENSG00000119650	0	0	0	0		0	0	0	0	0	0	0	4967	0.00951429	0.00279099	2.33761	2.33761	PAX7 up vs OCT4	1.41936	3.84992	3.67677	6.80247	3.62468	3.46351	1
0	ENSG00000119673	0	0	0	0		0	0	0	0	0	0	0	4972	0.0195673	0.00618099	3.38096	3.38096	PAX7 up vs OCT4	1.509	7.57512	3.26223	5.40569	7.53045	9.05488	1
0	ENSG00000119801	0	0	0	0		0	0	0	0	0	0	0	5001	0.0267776	0.00886889	38.6633	38.6633	PAX7 up vs OCT4	2.96487	504.187	3.07466	4.84474	68.3934	91.7608	1
0	ENSG00000120137	0	0	0	0		0	0	0	0	0	0	0	5048	0.00584409	0.00164927	238.891	238.891	PAX7 up vs OCT4	11.9891	4760.07	3.95393	7.83823	150.203	124.559	1
0	ENSG00000120738	0	0	0	0		0	0	0	0	0	0	0	5131	0.00396807	0.00117851	4.94407e+22	4.94407e+22	PAX7 up vs OCT4	67770600000	3.60685e+34	4.1328	8.71818	13924.6	10381.8	1
0	ENSG00000121039	0	0	0	0		0	0	0	0	0	0	0	5165	0.000245601	9.40295e-05	2.58072	2.58072	PAX7 up vs OCT4	1.78417	3.73291	5.54885	16.8487	4.91395	1.89574	1
0	ENSG00000121281	0	0	0	0		0	0	0	0	0	0	0	5185	0.00313549	0.000996724	2.70313	2.70313	PAX7 up vs OCT4	1.62523	4.49594	4.22259	9.27964	5.14156	3.60145	1
0	ENSG00000121350	0	0	0	0		0	0	0	0	0	0	0	5193	0.000901614	0.000251959	2.11346	2.11346	PAX7 up vs OCT4	1.52754	2.92413	4.97942	12.6149	2.84643	1.46666	1
0	ENSG00000121864	0	0	0	0		0	0	0	0	0	0	0	5242	0.0354287	0.0114557	14.4425	14.4425	PAX7 up vs OCT4	2.03223	102.639	2.94158	4.36649	35.9453	53.5085	1
0	ENSG00000122477	0	0	0	0		0	0	0	0	0	0	0	5304	0.0343985	0.0108874	2.39606	2.39606	PAX7 up vs OCT4	1.26845	4.52611	2.96806	4.41594	3.82402	5.62873	1
0	ENSG00000122691	0	0	0	0		0	0	0	0	0	0	0	5335	8.3014e-05	3.48696e-05	7.17158	7.17158	PAX7 up vs OCT4	3.58973	14.3274	6.15014	21.089	21.6204	6.6638	1
0	ENSG00000122877	0	0	0	0		0	0	0	0	0	0	0	5363	0.0014537	0.000858734	344.655	344.655	PAX7 up vs OCT4	18.3407	6476.67	4.30285	11.2605	207.416	119.728	1
0	ENSG00000123358	0	0	0	0		0	0	0	0	0	0	0	5414	0.00992219	0.0118411	78.0084	78.0084	PAX7 up vs OCT4	3.12119	1949.68	2.92435	6.71684	148.948	144.139	1
0	ENSG00000123728	0	0	0	0		0	0	0	0	0	0	0	5461	0.0129518	0.00397618	32.6428	32.6428	PAX7 up vs OCT4	3.77752	282.077	3.49179	6.18599	61.5836	64.7097	1
0	ENSG00000124006	0	0	0	0		0	0	0	0	0	0	0	5482	0.00492519	0.00144278	105.404	105.404	PAX7 up vs OCT4	8.65159	1284.17	4.02493	8.22059	109.986	86.9659	1
0	ENSG00000124693	0	0	0	0		0	0	0	0	0	0	0	5610	0.0118091	0.00350785	1.1855e+80	1.1855e+80	PAX7 up vs OCT4	2.7728e+31	5.06856e+128	3.55718	6.36753	170908	174464	1
0	ENSG00000124701	0	0	0	0		0	0	0	0	0	0	0	5611	0.00329568	0.000912486	45775.1	45775.1	PAX7 up vs OCT4	200.762	10437000	4.2701	9.15914	577.948	410.154	1
0	ENSG00000124743	0	0	0	0		0	0	0	0	0	0	0	5617	0.0102377	0.00429004	6.24474	6.24474	PAX7 up vs OCT4	1.98465	19.6492	3.45219	6.65334	18.714	18.2828	1
0	ENSG00000125430	0	0	0	0		0	0	0	0	0	0	0	5689	0.0136681	0.0093503	2.62041	2.62041	PAX7 up vs OCT4	1.3236	5.18776	3.0472	6.08135	6.07212	6.49013	1
0	ENSG00000127334	0	0	0	0		0	0	0	0	0	0	0	5950	0.00214453	0.00108724	5.64155	5.64155	PAX7 up vs OCT4	2.30501	13.8078	4.17595	10.2293	17.5427	11.1472	1
0	ENSG00000128881	0	0	0	0		0	0	0	0	0	0	0	6124	0.00448503	0.00125103	7.84859	7.84859	PAX7 up vs OCT4	2.65102	23.2365	4.1009	8.43414	21.269	16.3915	1
0	ENSG00000129473	0	0	0	0		0	0	0	0	0	0	0	6193	0.0312696	0.0119466	5.5106	5.5106	PAX7 up vs OCT4	1.55873	19.4817	2.91974	4.57728	15.6247	22.188	1
0	ENSG00000130158	0	0	0	0		0	0	0	0	0	0	0	6261	0.0186547	0.00560056	21.186	21.186	PAX7 up vs OCT4	2.89384	155.105	3.31348	5.4935	46.6038	55.1424	1
0	ENSG00000130193	0	0	0	0		0	0	0	0	0	0	0	6271	0.00281248	0.000987417	3.45541	3.45541	PAX7 up vs OCT4	1.83367	6.51148	4.22764	9.54579	8.2037	5.58613	1
0	ENSG00000130522	0	0	0	0		0	0	0	0	0	0	0	6330	0.0389244	0.0123828	153642000	153642000	PAX7 up vs OCT4	123.071	191808000000000	2.90106	4.21032	1775.91	2741.7	1
0	ENSG00000130600	0	0	0	0		0	0	0	0	0	0	0	6347	0.00597091	0.0075534	8.98847e+307	8.98847e+307	PAX7 up vs OCT4	4.61015e+131	8.98847e+307	3.15807	7.79095	7186960	5996090	1
0	ENSG00000131051	0	0	0	0		0	0	0	0	0	0	0	6439	0.0241115	0.00859218	2888.62	2888.62	PAX7 up vs OCT4	11.0164	757428	3.09113	5.02927	333.901	431.544	1
0	ENSG00000131650	0	0	0	0		0	0	0	0	0	0	0	6524	0.0149368	0.0105307	19.3177	19.3177	PAX7 up vs OCT4	2.2666	164.64	2.98538	5.91072	58.0915	63.8831	1
0	ENSG00000132825	0	0	0	0		0	0	0	0	0	0	0	6720	1.4643e-05	3.46172e-06	2.56724	2.56724	PAX7 up vs OCT4	1.96951	3.34636	7.685	29.5298	4.44049	0.977424	1
0	ENSG00000133612	0	0	0	0		0	0	0	0	0	0	0	6825	0.0242861	0.0079761	2.31483	2.31483	PAX7 up vs OCT4	1.2969	4.13175	3.12978	5.01648	3.60441	4.67034	1
0	ENSG00000133639	0	0	0	0		0	0	0	0	0	0	0	6830	0.00714047	0.00202286	16098.6	16098.6	PAX7 up vs OCT4	69.7832	3713870	3.84599	7.40302	469.155	411.927	1
0	ENSG00000134594	0	0	0	0		0	0	0	0	0	0	0	6987	0.015053	0.00603639	2.74838	2.74838	PAX7 up vs OCT4	1.41058	5.35498	3.27453	5.89592	5.61509	6.1904	1
0	ENSG00000135002	0	0	0	0		0	0	0	0	0	0	0	7052	0.0126282	0.00451367	15.0486	15.0486	PAX7 up vs OCT4	2.72227	83.1883	3.42572	6.23547	39.0216	40.677	1
0	ENSG00000135317	0	0	0	0		0	0	0	0	0	0	0	7106	0.0089473	0.00260632	4.08702	4.08702	PAX7 up vs OCT4	1.8015	9.27212	3.71267	6.92881	9.95332	9.33733	1
0	ENSG00000135535	0	0	0	0		0	0	0	0	0	0	0	7161	0.0027462	0.000747162	6975.55	6975.55	PAX7 up vs OCT4	88.5089	549756	4.37814	9.60478	392.104	265.355	1
0	ENSG00000135776	0	0	0	0		0	0	0	0	0	0	0	7206	0.00238769	0.00121233	8.259	8.259	PAX7 up vs OCT4	2.72807	25.0034	4.11768	9.95514	26.1477	17.0726	1
0	ENSG00000136783	0	0	0	0		0	0	0	0	0	0	0	7392	0.0210096	0.0068853	11.3941	11.3941	PAX7 up vs OCT4	2.21143	58.7068	3.20617	5.27614	30.3565	37.3981	1
0	ENSG00000136878	0	0	0	0		0	0	0	0	0	0	0	7423	0.00103098	0.000342417	4.12397	4.12397	PAX7 up vs OCT4	2.18167	7.79546	4.80716	12.2246	10.609	5.64096	1
0	ENSG00000137601	0	0	0	0		0	0	0	0	0	0	0	7558	0.00316011	0.001076	2.21774	2.21774	PAX7 up vs OCT4	1.46959	3.34676	4.18152	9.26067	3.35679	2.35611	1
0	ENSG00000137693	0	0	0	0		0	0	0	0	0	0	0	7570	0.0375979	0.0119068	195.3	195.3	PAX7 up vs OCT4	3.95162	9652.29	2.92147	4.2676	138.976	211.675	1
0	ENSG00000138036	0	0	0	0		0	0	0	0	0	0	0	7651	0.0310249	0.00969628	2.56937	2.56937	PAX7 up vs OCT4	1.31057	5.03726	3.02831	4.59067	4.45347	6.30574	1
0	ENSG00000138136	0	0	0	0		0	0	0	0	0	0	0	7680	0.0156172	0.00478142	97.6716	97.6716	PAX7 up vs OCT4	5.29509	1801.62	3.39573	5.82596	105.957	118.216	1
0	ENSG00000138193	0	0	0	0		0	0	0	0	0	0	0	7693	6.02082e-08	1.38465e-08	2.31155	2.31155	PAX7 up vs OCT4	1.99799	2.67431	12.4178	77.3949	3.52057	0.295674	1
0	ENSG00000138640	0	0	0	0		0	0	0	0	0	0	0	7761	0.000946505	0.000266255	2.26127	2.26127	PAX7 up vs OCT4	1.5836	3.22894	4.94827	12.4725	3.38798	1.76563	1
0	ENSG00000139684	0	0	0	0		0	0	0	0	0	0	0	7930	0.0270534	0.0100766	11111.8	11111.8	PAX7 up vs OCT4	13.8155	8937250	3.00831	4.82687	462.433	622.726	1
0	ENSG00000140470	0	0	0	0		0	0	0	0	0	0	0	8036	7.18458e-05	2.06047e-05	4.44628	4.44628	PAX7 up vs OCT4	2.70414	7.31079	6.48206	21.7092	11.4917	3.44076	1
0	ENSG00000141161	0	0	0	0		0	0	0	0	0	0	0	8138	0.0137765	0.00516015	210.749	210.749	PAX7 up vs OCT4	6.72839	6601.17	3.35607	6.06608	154.047	165.066	1
0	ENSG00000141298	0	0	0	0		0	0	0	0	0	0	0	8152	0.0187463	0.00773607	3.32059	3.32059	PAX7 up vs OCT4	1.45632	7.57139	3.14566	5.48446	7.9757	9.45253	1
0	ENSG00000141576	0	0	0	0		0	0	0	0	0	0	0	8212	0.00218683	0.000585803	3.29602	3.29602	PAX7 up vs OCT4	1.86165	5.83555	4.51062	10.1791	7.11053	4.54052	1
0	ENSG00000142178	0	0	0	0		0	0	0	0	0	0	0	8273	0.00278938	0.00122901	268.546	268.546	PAX7 up vs OCT4	14.2022	5077.89	4.11038	9.56616	176.953	120.236	1
0	ENSG00000142188	0	0	0	0		0	0	0	0	0	0	0	8277	0.0306032	0.00963542	4.5428	4.5428	PAX7 up vs OCT4	1.5449	13.3582	3.03158	4.61405	11.4901	16.1866	1
0	ENSG00000142611	0	0	0	0		0	0	0	0	0	0	0	8325	0.0291753	0.0110453	2.96428	2.96428	PAX7 up vs OCT4	1.34138	6.55068	2.96056	4.69605	6.32036	8.74827	1
0	ENSG00000142871	0	0	0	0		0	0	0	0	0	0	0	8358	0.0182744	0.00938729	6572890000000000	6572890000000000	PAX7 up vs OCT4	39435.9	1.09552e+27	3.04514	5.53156	7905.76	9289.86	1
0	ENSG00000143258	0	0	0	0		0	0	0	0	0	0	0	8421	0.027892	0.0123274	2.06987	2.06987	PAX7 up vs OCT4	1.20463	3.55658	2.90339	4.7738	2.99429	4.07702	1
0	ENSG00000143322	0	0	0	0		0	0	0	0	0	0	0	8432	0.00674133	0.00193301	5.74162	5.74162	PAX7 up vs OCT4	2.16427	15.232	3.86996	7.5266	15.3366	13.2448	1
0	ENSG00000143429	0	0	0	0		0	0	0	0	0	0	0	8463	0.00197811	0.000752987	2.09831	2.09831	PAX7 up vs OCT4	1.4551	3.02584	4.37393	10.4385	2.99415	1.86444	1
0	ENSG00000143653	0	0	0	0		0	0	0	0	0	0	0	8518	0.00312859	0.00110293	144.526	144.526	PAX7 up vs OCT4	10.9767	1902.92	4.16827	9.28499	132.061	92.4502	1
0	ENSG00000143816	0	0	0	0		0	0	0	0	0	0	0	8542	1.79167e-05	4.40921e-06	2.01169	2.01169	PAX7 up vs OCT4	1.64546	2.45944	7.51424	28.4286	2.45753	0.561898	1
0	ENSG00000143878	0	0	0	0		0	0	0	0	0	0	0	8555	0.00527657	0.00148481	1.55168e+16	1.55168e+16	PAX7 up vs OCT4	29333100	8.20819e+24	4.00967	8.06534	6965.7	5613.78	1
0	ENSG00000144485	0	0	0	0		0	0	0	0	0	0	0	8643	0.00352413	0.001689	2548780	2548780	PAX7 up vs OCT4	784.885	8276720000	3.94132	8.99851	1259.3	909.643	1
0	ENSG00000144644	0	0	0	0		0	0	0	0	0	0	0	8664	7.00165e-05	1.74914e-05	2.47562	2.47562	PAX7 up vs OCT4	1.83897	3.33269	6.5874	21.8213	4.1283	1.22971	1
0	ENSG00000145375	0	0	0	0		0	0	0	0	0	0	0	8764	0.0304491	0.00961939	3.27297	3.27297	PAX7 up vs OCT4	1.40633	7.6172	3.03245	4.62268	7.06066	9.92806	1
0	ENSG00000145725	0	0	0	0		0	0	0	0	0	0	0	8806	0.0151092	0.00488449	2.89516	2.89516	PAX7 up vs OCT4	1.4689	5.70627	3.38463	5.88882	5.80357	6.4059	1
0	ENSG00000146085	0	0	0	0		0	0	0	0	0	0	0	8873	0.00693034	0.00206139	13.222	13.222	PAX7 up vs OCT4	3.08893	56.596	3.83604	7.46706	33.7946	29.4178	1
0	ENSG00000146197	0	0	0	0		0	0	0	0	0	0	0	8884	5.86648e-05	1.85817e-05	5.00675	5.00675	PAX7 up vs OCT4	2.94284	8.51814	6.5484	22.6026	13.6633	3.92925	1
0	ENSG00000146281	0	0	0	0		0	0	0	0	0	0	0	8900	0.0102855	0.00314711	14.7658	14.7658	PAX7 up vs OCT4	2.95312	73.8296	3.6139	6.64391	36.8394	36.0415	1
0	ENSG00000146350	0	0	0	0		0	0	0	0	0	0	0	8903	8.57761e-05	2.90183e-05	5.64093	5.64093	PAX7 up vs OCT4	3.10641	10.2434	6.26495	20.9504	15.9612	4.95205	1
0	ENSG00000146555	0	0	0	0		0	0	0	0	0	0	0	8932	0.0112197	0.0049659	2.18171	2.18171	PAX7 up vs OCT4	1.32433	3.59416	3.37603	6.46929	3.45099	3.46738	1
0	ENSG00000146802	0	0	0	0		0	0	0	0	0	0	0	8956	0.00731806	0.00799046	3.03126	3.03126	PAX7 up vs OCT4	1.40954	6.5188	3.12885	7.35058	9.22546	8.15793	1
0	ENSG00000146963	0	0	0	0		0	0	0	0	0	0	0	8978	0.00404568	0.00114304	4.06837	4.06837	PAX7 up vs OCT4	1.95934	8.44757	4.14915	8.6729	9.91064	7.42764	1
0	ENSG00000148225	0	0	0	0		0	0	0	0	0	0	0	9139	2.59114e-05	1.09183e-05	2.05721	2.05721	PAX7 up vs OCT4	1.6411	2.57883	6.89598	26.5012	2.89707	0.71057	1
0	ENSG00000148677	0	0	0	0		0	0	0	0	0	0	0	9197	0.0180295	0.00543099	4.30407	4.30407	PAX7 up vs OCT4	1.66947	11.0963	3.32947	5.55657	10.6682	12.4795	1
0	ENSG00000150672	0	0	0	0		0	0	0	0	0	0	0	9399	0.00167617	0.000452612	2.54616	2.54616	PAX7 up vs OCT4	1.64971	3.92975	4.65232	10.8757	4.38476	2.62062	1
0	ENSG00000150756	0	0	0	0		0	0	0	0	0	0	0	9408	0.0023244	0.000752387	6.5026	6.5026	PAX7 up vs OCT4	2.57945	16.3926	4.37436	10.0233	18.3432	11.8954	1
0	ENSG00000151148	0	0	0	0		0	0	0	0	0	0	0	9448	0.016525	0.00545199	2.43128	2.43128	PAX7 up vs OCT4	1.36562	4.32853	3.32746	5.71927	4.07325	4.62928	1
0	ENSG00000151239	0	0	0	0		0	0	0	0	0	0	0	9457	0.0297604	0.00945792	46.6919	46.6919	PAX7 up vs OCT4	3.04429	716.139	3.04125	4.6619	74.3909	103.722	1
0	ENSG00000151338	0	0	0	0		0	0	0	0	0	0	0	9469	0.000159348	3.93375e-05	2.04422	2.04422	PAX7 up vs OCT4	1.58528	2.63602	6.0754	18.4556	2.55388	0.899467	1
0	ENSG00000151414	0	0	0	0		0	0	0	0	0	0	0	9480	0.00955823	0.0029654	7.91136	7.91136	PAX7 up vs OCT4	2.32202	26.9548	3.64502	6.79305	21.8515	20.9089	1
0	ENSG00000151790	0	0	0	0		0	0	0	0	0	0	0	9538	0.0165494	0.00682242	3.77251	3.77251	PAX7 up vs OCT4	1.54406	9.21715	3.21094	5.71651	9.76526	11.1037	1
0	ENSG00000152620	0	0	0	0		0	0	0	0	0	0	0	9647	0.000866694	0.000340002	43.5613	43.5613	PAX7 up vs OCT4	7.99988	237.202	4.81111	12.7314	78.2741	39.9628	1
0	ENSG00000152700	0	0	0	0		0	0	0	0	0	0	0	9656	0.00917366	0.00316796	2.20017	2.20017	PAX7 up vs OCT4	1.37259	3.52672	3.61044	6.8773	3.2774	3.0976	1
0	ENSG00000152818	0	0	0	0		0	0	0	0	0	0	0	9671	0.00753949	0.00217812	22.5066	22.5066	PAX7 up vs OCT4	3.84516	131.736	3.80702	7.2872	48.7041	43.4428	1
0	ENSG00000153936	0	0	0	0		0	0	0	0	0	0	0	9786	0.00400164	0.00117601	6.80435	6.80435	PAX7 up vs OCT4	2.49792	18.5351	4.13394	8.69847	18.6984	13.9725	1
0	ENSG00000155330	0	0	0	0		0	0	0	0	0	0	0	9954	0.00527468	0.001496	6.48849	6.48849	PAX7 up vs OCT4	2.36664	17.7891	4.00568	8.06615	17.5631	14.153	1
0	ENSG00000155657	0	0	0	0		0	0	0	0	0	0	0	9979	0.00248972	0.000786978	62051.4	62051.4	PAX7 up vs OCT4	258.525	14893600	4.35001	9.84954	633.325	417.949	1
0	ENSG00000155850	0	0	0	0		0	0	0	0	0	0	0	9998	0.017928	0.00557235	2.37828	2.37828	PAX7 up vs OCT4	1.3525	4.18205	3.31611	5.56704	3.79639	4.43261	1
0	ENSG00000156162	0	0	0	0		0	0	0	0	0	0	0	10041	0.00672771	0.00192872	11.6747	11.6747	PAX7 up vs OCT4	2.96243	46.0093	3.87114	7.53097	30.3197	26.169	1
0	ENSG00000156273	0	0	0	0		0	0	0	0	0	0	0	10058	0.0203345	0.00768124	23.0917	23.0917	PAX7 up vs OCT4	2.68017	198.952	3.14935	5.33546	52.9704	64.532	1
0	ENSG00000156958	0	0	0	0		0	0	0	0	0	0	0	10132	0.00324654	0.000892099	2.42975	2.42975	PAX7 up vs OCT4	1.55256	3.80254	4.28228	9.19538	3.94847	2.79108	1
0	ENSG00000157119	0	0	0	0		0	0	0	0	0	0	0	10158	0.00579297	0.00215996	5.53244	5.53244	PAX7 up vs OCT4	2.09808	14.5886	3.81142	7.85762	15.8132	13.081	1
0	ENSG00000158022	0	0	0	0		0	0	0	0	0	0	0	10264	0.00949298	0.00287043	2.10704	2.10704	PAX7 up vs OCT4	1.35746	3.27052	3.66207	6.80706	2.8167	2.68964	1
0	ENSG00000158122	0	0	0	0		0	0	0	0	0	0	0	10278	0.0120913	0.00382397	2.67569	2.67569	PAX7 up vs OCT4	1.46054	4.90181	3.51214	6.32087	4.959	5.09954	1
0	ENSG00000158711	0	0	0	0		0	0	0	0	0	0	0	10347	0.0229139	0.00884865	3.73815	3.73815	PAX7 up vs OCT4	1.48062	9.4378	3.07585	5.11999	9.40047	11.9342	1
0	ENSG00000159173	0	0	0	0		0	0	0	0	0	0	0	10402	0.00220827	0.000593992	551019	551019	PAX7 up vs OCT4	970.037	313000000	4.50303	10.1541	874.287	559.663	1
0	ENSG00000159248	0	0	0	0		0	0	0	0	0	0	0	10423	0.0144462	0.00425255	70.3775	70.3775	PAX7 up vs OCT4	4.92999	1004.67	3.45676	5.97464	90.3924	98.3407	1
0	ENSG00000159388	0	0	0	0		0	0	0	0	0	0	0	10444	0.00231358	0.000624836	20387700000	20387700000	PAX7 up vs OCT4	215181	1931680000000000	4.47538	10.0351	2820.65	1827	1
0	ENSG00000159423	0	0	0	0		0	0	0	0	0	0	0	10449	0.0335906	0.0110684	21.1441	21.1441	PAX7 up vs OCT4	2.27942	196.135	2.95948	4.45593	47.3244	69.0336	1
0	ENSG00000159905	0	0	0	0		0	0	0	0	0	0	0	10499	0.0199519	0.00660549	3.05471	3.05471	PAX7 up vs OCT4	1.44668	6.45011	3.22772	5.3701	6.42155	7.77268	1
0	ENSG00000160233	0	0	0	0		0	0	0	0	0	0	0	10556	0.000364213	0.000133071	2.30256	2.30256	PAX7 up vs OCT4	1.64369	3.22556	5.34527	15.4753	3.76398	1.58096	1
0	ENSG00000161835	0	0	0	0		0	0	0	0	0	0	0	10744	0.00301497	0.000818914	4.16108	4.16108	PAX7 up vs OCT4	2.04248	8.47724	4.32849	9.37508	10.1623	7.04583	1
0	ENSG00000161960	0	0	0	0		0	0	0	0	0	0	0	10765	0.00992017	0.0125224	7.2576	7.2576	PAX7 up vs OCT4	1.65379	31.8496	2.89522	6.71725	31.452	30.4348	1
0	ENSG00000162068	0	0	0	0		0	0	0	0	0	0	0	10783	0.0344612	0.0116407	3.04445	3.04445	PAX7 up vs OCT4	1.34091	6.91226	2.93324	4.41288	6.35125	9.35513	1
0	ENSG00000162244	0	0	0	0		0	0	0	0	0	0	0	10804	0.00796956	0.00419284	2.13246e+32	2.13246e+32	PAX7 up vs OCT4	1470000000000	3.09345e+52	3.46413	7.17004	33077.7	29986.6	1
0	ENSG00000162302	0	0	0	0		0	0	0	0	0	0	0	10809	0.0206226	0.00758067	3.32061	3.32061	PAX7 up vs OCT4	1.46033	7.55065	3.1562	5.30987	7.67039	9.38959	1
0	ENSG00000162413	0	0	0	0		0	0	0	0	0	0	0	10833	0.00949887	0.0086527	10.0557	10.0557	PAX7 up vs OCT4	1.99989	50.5613	3.08749	6.80579	38	36.2926	1
0	ENSG00000162783	0	0	0	0		0	0	0	0	0	0	0	10941	0.0263186	0.00919887	22.3621	22.3621	PAX7 up vs OCT4	2.48546	201.196	3.05568	4.87496	50.3652	67.1541	1
0	ENSG00000162981	0	0	0	0		0	0	0	0	0	0	0	10989	0.000179607	5.06319e-05	2.1203	2.1203	PAX7 up vs OCT4	1.61174	2.78932	5.92046	18.0003	2.89789	1.04644	1
0	ENSG00000163145	0	0	0	0		0	0	0	0	0	0	0	11038	0.000447756	0.000136098	720.939	720.939	PAX7 up vs OCT4	50.1195	10370.3	5.3322	14.7881	225.017	98.9044	1
0	ENSG00000163162	0	0	0	0		0	0	0	0	0	0	0	11045	0.0049225	0.00496969	5.88908	5.88908	PAX7 up vs OCT4	1.89332	18.3176	3.37563	8.22183	22.6629	17.9168	1
0	ENSG00000163521	0	0	0	0		0	0	0	0	0	0	0	11147	0.0219731	0.00811256	2.0514	2.0514	PAX7 up vs OCT4	1.24752	3.3733	3.12097	5.19518	2.75101	3.44195	1
0	ENSG00000163527	0	0	0	0		0	0	0	0	0	0	0	11148	0.0207837	0.012372	32944.3	32944.3	PAX7 up vs OCT4	14.2557	76133000	2.90151	5.29574	680.065	834.714	1
0	ENSG00000163660	0	0	0	0		0	0	0	0	0	0	0	11202	0.000514297	0.000149996	24526.6	24526.6	PAX7 up vs OCT4	390.983	1538560	5.27585	14.3392	525.796	238.345	1
0	ENSG00000163703	0	0	0	0		0	0	0	0	0	0	0	11217	0.00760516	0.00232435	3.28118	3.28118	PAX7 up vs OCT4	1.66167	6.47913	3.77282	7.26882	7.20285	6.44101	1
0	ENSG00000163738	0	0	0	0		0	0	0	0	0	0	0	11228	0.000231871	6.19768e-05	2.18485	2.18485	PAX7 up vs OCT4	1.63285	2.92345	5.79781	17.0563	3.09639	1.18001	1
0	ENSG00000163879	0	0	0	0		0	0	0	0	0	0	0	11273	0.0155356	0.00522321	2.36245	2.36245	PAX7 up vs OCT4	1.35696	4.11298	3.34975	5.83589	3.8403	4.27732	1
0	ENSG00000164039	0	0	0	0		0	0	0	0	0	0	0	11322	0.00783533	0.00223646	156.472	156.472	PAX7 up vs OCT4	8.80217	2781.52	3.7931	7.20581	127.75	115.237	1
0	ENSG00000164091	0	0	0	0		0	0	0	0	0	0	0	11350	0.0201589	0.00670032	605.99	605.99	PAX7 up vs OCT4	8.23821	44575.7	3.22032	5.35126	211.612	257.038	1
0	ENSG00000164506	0	0	0	0		0	0	0	0	0	0	0	11480	0.00125007	0.000346084	2.8196	2.8196	PAX7 up vs OCT4	1.76856	4.49527	4.80122	11.6777	5.4383	3.02705	1
0	ENSG00000164603	0	0	0	0		0	0	0	0	0	0	0	11499	0.0014047	0.000384704	34.9235	34.9235	PAX7 up vs OCT4	6.92071	176.232	4.74233	11.3544	63.6798	36.4543	1
0	ENSG00000164758	0	0	0	0		0	0	0	0	0	0	0	11548	7.02125e-05	3.48224e-05	8.92004	8.92004	PAX7 up vs OCT4	4.13596	19.2379	6.15098	21.8091	27.5774	8.21918	1
0	ENSG00000164920	0	0	0	0		0	0	0	0	0	0	0	11587	0.0368401	0.0116454	5.45391	5.45391	PAX7 up vs OCT4	1.56341	19.0258	2.93303	4.30138	14.3743	21.7217	1
0	ENSG00000164932	0	0	0	0		0	0	0	0	0	0	0	11591	0.0331553	0.0108397	3.87279	3.87279	PAX7 up vs OCT4	1.44659	10.3682	2.97034	4.47793	9.29559	13.4931	1
0	ENSG00000164946	0	0	0	0		0	0	0	0	0	0	0	11598	0.000520652	0.000339049	5.96856	5.96856	PAX7 up vs OCT4	2.67663	13.3092	4.81268	14.2998	19.6859	8.94826	1
0	ENSG00000165030	0	0	0	0		0	0	0	0	0	0	0	11617	0.0102267	0.00362555	92.3154	92.3154	PAX7 up vs OCT4	5.83313	1460.99	3.53995	6.65551	108.656	106.118	1
0	ENSG00000165233	0	0	0	0		0	0	0	0	0	0	0	11667	0.000174706	0.000102728	2.04379	2.04379	PAX7 up vs OCT4	1.54321	2.70676	5.49666	18.1048	3.0589	1.09821	1
0	ENSG00000165300	0	0	0	0		0	0	0	0	0	0	0	11682	0.0216585	0.00674127	3.51795	3.51795	PAX7 up vs OCT4	1.51164	8.18711	3.21715	5.22116	7.97426	9.92743	1
0	ENSG00000165475	0	0	0	0		0	0	0	0	0	0	0	11715	0.00958083	0.00297128	7.09515	7.09515	PAX7 up vs OCT4	2.22055	22.6705	3.64398	6.78822	19.6085	18.776	1
0	ENSG00000165943	0	0	0	0		0	0	0	0	0	0	0	11836	0.00178843	0.000574791	415.458	415.458	PAX7 up vs OCT4	23.2947	7409.63	4.521	10.7032	190.188	115.5	1
0	ENSG00000165997	0	0	0	0		0	0	0	0	0	0	0	11849	0.0063929	0.00189976	6739.03	6739.03	PAX7 up vs OCT4	49.7014	913747	3.87912	7.64159	394.291	335.388	1
0	ENSG00000166292	0	0	0	0		0	0	0	0	0	0	0	11931	0.000242239	6.96494e-05	2.55309	2.55309	PAX7 up vs OCT4	1.79277	3.63584	5.72758	16.8983	4.52115	1.73909	1
0	ENSG00000167380	0	0	0	0		0	0	0	0	0	0	0	12203	0.0236555	0.0116423	3.68296	3.68296	PAX7 up vs OCT4	1.40986	9.62097	2.93317	5.06319	9.99327	12.8291	1
0	ENSG00000167526	0	0	0	0		0	0	0	0	0	0	0	12232	0.00268111	0.000726446	2.55159e+22	2.55159e+22	PAX7 up vs OCT4	244730000000	2.66033e+33	4.3934	9.66431	13315.3	8955.6	1
0	ENSG00000167617	0	0	0	0		0	0	0	0	0	0	0	12260	0.0064299	0.00217134	19.8183	19.8183	PAX7 up vs OCT4	3.64197	107.844	3.80866	7.62904	46.8675	39.9314	1
0	ENSG00000168079	0	0	0	0		0	0	0	0	0	0	0	12403	0.00625251	0.00246889	34.4616	34.4616	PAX7 up vs OCT4	4.46247	266.131	3.74111	7.68999	68.7833	58.1394	1
0	ENSG00000168228	0	0	0	0		0	0	0	0	0	0	0	12429	0.00496506	0.00145067	2.67575	2.67575	PAX7 up vs OCT4	1.57707	4.53984	4.02203	8.20234	4.90715	3.8887	1
0	ENSG00000168509	0	0	0	0		0	0	0	0	0	0	0	12506	0.00168958	0.000495829	21.3692	21.3692	PAX7 up vs OCT4	5.07621	89.9571	4.60207	10.8544	48.0048	28.7471	1
0	ENSG00000168702	0	0	0	0		0	0	0	0	0	0	0	12545	0.000344291	0.00011076	6.16468	6.16468	PAX7 up vs OCT4	2.99869	12.6733	5.45243	15.6663	17.4166	7.2262	1
0	ENSG00000168743	0	0	0	0		0	0	0	0	0	0	0	12550	0.0190328	0.00786166	10.7715	10.7715	PAX7 up vs OCT4	2.09624	55.3489	3.13729	5.45653	31.291	37.2749	1
0	ENSG00000168952	0	0	0	0		0	0	0	0	0	0	0	12608	6.21918e-05	0.000436432	3.25557	3.25557	PAX7 up vs OCT4	1.88628	5.61885	4.67243	22.3424	14.2452	4.1443	1
0	ENSG00000169242	0	0	0	0		0	0	0	0	0	0	0	12682	0.0202843	0.00780994	4.02531	4.02531	PAX7 up vs OCT4	1.54448	10.491	3.14072	5.33996	10.4888	12.7673	1
0	ENSG00000169255	0	0	0	0		0	0	0	0	0	0	0	12691	0.000650552	0.000395203	4.31193	4.31193	PAX7 up vs OCT4	2.21122	8.40834	4.72739	13.5991	12.9834	6.2057	1
0	ENSG00000169733	0	0	0	0		0	0	0	0	0	0	0	12788	0.032177	0.0101075	2.70981	2.70981	PAX7 up vs OCT4	1.32393	5.54641	3.00671	4.52864	4.97345	7.13845	1
0	ENSG00000169762	0	0	0	0		0	0	0	0	0	0	0	12797	0.000100678	3.83382e-05	2.13695	2.13695	PAX7 up vs OCT4	1.6324	2.79743	6.09131	20.2822	3.1492	1.00925	1
0	ENSG00000169902	0	0	0	0		0	0	0	0	0	0	0	12829	0.00237845	0.000718477	4.1869	4.1869	PAX7 up vs OCT4	2.07255	8.45825	4.39938	9.96495	10.5474	6.87991	1
0	ENSG00000170191	0	0	0	0		0	0	0	0	0	0	0	12893	0.00967519	0.00400112	2.01314	2.01314	PAX7 up vs OCT4	1.30524	3.10497	3.48853	6.7682	2.72019	2.6124	1
0	ENSG00000170345	0	0	0	0		0	0	0	0	0	0	0	12929	0.0158158	0.0066329	4.70499e+54	4.70499e+54	PAX7 up vs OCT4	1.13476e+18	1.95081e+91	3.22557	5.80202	88293	98914.6	1
0	ENSG00000170464	0	0	0	0		0	0	0	0	0	0	0	12961	0.0215669	0.006675	3.45787	3.45787	PAX7 up vs OCT4	1.5051	7.94421	3.22228	5.22881	7.744	9.62667	1
0	ENSG00000170540	0	0	0	0		0	0	0	0	0	0	0	12983	0.00774644	0.00422251	14572600000	14572600000	PAX7 up vs OCT4	6583.04	3.22589e+16	3.46046	7.22988	3303.51	2970.01	1
0	ENSG00000170681	0	0	0	0		0	0	0	0	0	0	0	13015	0.00214747	0.000648821	95.6411	95.6411	PAX7 up vs OCT4	10.4745	873.28	4.45485	10.2258	107.069	68.0585	1
0	ENSG00000170802	0	0	0	0		0	0	0	0	0	0	0	13037	0.00490697	0.00135993	12.6498	12.6498	PAX7 up vs OCT4	3.27441	48.8691	4.0564	8.22899	32.1748	25.4145	1
0	ENSG00000171223	0	0	0	0		0	0	0	0	0	0	0	13151	0.00513558	0.001559	428447000000	428447000000	PAX7 up vs OCT4	210870	8.70519e+17	3.98378	8.12616	3669.6	2935.26	1
0	ENSG00000171282	0	0	0	0		0	0	0	0	0	0	0	13160	0.031411	0.0103656	15.7509	15.7509	PAX7 up vs OCT4	2.15405	115.173	2.99361	4.56959	38.7185	55.075	1
0	ENSG00000171295	0	0	0	0		0	0	0	0	0	0	0	13162	0.000562088	0.000162935	2.57272	2.57272	PAX7 up vs OCT4	1.74104	3.80167	5.2281	14.0562	4.58774	2.1215	1
0	ENSG00000171310	0	0	0	0		0	0	0	0	0	0	0	13167	0.0197274	0.00675641	2.72552	2.72552	PAX7 up vs OCT4	1.38974	5.34524	3.21599	5.39078	5.23505	6.31223	1
0	ENSG00000171448	0	0	0	0		0	0	0	0	0	0	0	13195	0.00297759	0.000935034	2.69101	2.69101	PAX7 up vs OCT4	1.62831	4.44728	4.25696	9.40558	5.08131	3.51159	1
0	ENSG00000171812	0	0	0	0		0	0	0	0	0	0	0	13290	0.0207934	0.00668311	36.7681	36.7681	PAX7 up vs OCT4	3.2787	412.326	3.22165	5.29489	66.2234	81.2957	1
0	ENSG00000172399	0	0	0	0		0	0	0	0	0	0	0	13442	0.0276893	0.00872869	6.04084	6.04084	PAX7 up vs OCT4	1.71295	21.3035	3.08294	4.78646	16.2748	22.1011	1
0	ENSG00000172572	0	0	0	0		0	0	0	0	0	0	0	13482	0.0203952	0.0103585	2.42577	2.42577	PAX7 up vs OCT4	1.27983	4.59777	2.99396	5.33003	4.66487	5.68884	1
0	ENSG00000172716	0	0	0	0		0	0	0	0	0	0	0	13503	1.28928e-06	1.16981e-06	38.6479	38.6479	PAX7 up vs OCT4	15.2386	98.0179	8.48329	45.8617	85.0288	12.0512	1
0	ENSG00000173210	0	0	0	0		0	0	0	0	0	0	0	13611	0.00192371	0.000511759	17.3398	17.3398	PAX7 up vs OCT4	4.52053	66.512	4.58468	10.5113	40.6663	25.1472	1
0	ENSG00000173442	0	0	0	0		0	0	0	0	0	0	0	13662	0.000619704	0.000178124	22.1299	22.1299	PAX7 up vs OCT4	6.0772	80.5853	5.17687	13.7499	49.1609	23.2398	1
0	ENSG00000173614	0	0	0	0		0	0	0	0	0	0	0	13700	0.0249122	0.00804649	2.23072	2.23072	PAX7 up vs OCT4	1.28108	3.88431	3.12522	4.97147	3.27351	4.27998	1
0	ENSG00000173812	0	0	0	0		0	0	0	0	0	0	0	13735	0.00987265	0.00806961	108243	108243	PAX7 up vs OCT4	35.6955	328237000	3.12373	6.72702	925.536	894.301	1
0	ENSG00000174093	0	0	0	0		0	0	0	0	0	0	0	13785	0.0129988	0.00412489	2.27092	2.27092	PAX7 up vs OCT4	1.36334	3.78266	3.47265	6.17891	3.44353	3.62247	1
0	ENSG00000174599	0	0	0	0		0	0	0	0	0	0	0	13882	0.0319298	0.0118666	2.41844	2.41844	PAX7 up vs OCT4	1.25919	4.64494	2.92323	4.54173	4.14119	5.92676	1
0	ENSG00000174652	0	0	0	0		0	0	0	0	0	0	0	13889	0.00265898	0.000720953	9.09869	9.09869	PAX7 up vs OCT4	3.07511	26.9213	4.39751	9.68494	24.3962	16.3734	1
0	ENSG00000174917	0	0	0	0		0	0	0	0	0	0	0	13938	0.0167458	0.00499901	13.129	13.129	PAX7 up vs OCT4	2.52305	68.3183	3.37257	5.69435	33.1594	37.8509	1
0	ENSG00000175387	0	0	0	0		0	0	0	0	0	0	0	14038	0.0258437	0.00945417	4.81875	4.81875	PAX7 up vs OCT4	1.57703	14.7241	3.04145	4.90687	13.1045	17.3592	1
0	ENSG00000175548	0	0	0	0		0	0	0	0	0	0	0	14067	0.00177318	0.000530359	3.49583	3.49583	PAX7 up vs OCT4	1.9334	6.32089	4.56508	10.7259	8.05448	4.88109	1
0	ENSG00000175697	0	0	0	0		0	0	0	0	0	0	0	14093	9.69409e-06	3.02065e-06	2.44915	2.44915	PAX7 up vs OCT4	1.90997	3.14056	7.78233	31.8902	4.2208	0.860303	1
0	ENSG00000175806	0	0	0	0		0	0	0	0	0	0	0	14119	1.17919e-05	6.75255e-06	2.00656	2.00656	PAX7 up vs OCT4	1.62909	2.47149	7.21945	30.7504	2.85876	0.604283	1
0	ENSG00000175893	0	0	0	0		0	0	0	0	0	0	0	14135	0.00112948	0.000490551	6.52518	6.52518	PAX7 up vs OCT4	2.70822	15.7218	4.60796	11.9636	19.8038	10.7597	1
0	ENSG00000175898	0	0	0	0		0	0	0	0	0	0	0	14138	0.0368975	0.0117899	3.03629	3.03629	PAX7 up vs OCT4	1.33748	6.89286	2.92661	4.2988	6.18515	9.35226	1
0	ENSG00000176824	0	0	0	0		0	0	0	0	0	0	0	14327	0.00982357	0.00331831	11.3964	11.3964	PAX7 up vs OCT4	2.63122	49.3599	3.5862	6.73717	30.9876	29.8967	1
0	ENSG00000177291	0	0	0	0		0	0	0	0	0	0	0	14435	0.011366	0.00698782	2.18134	2.18134	PAX7 up vs OCT4	1.28807	3.69411	3.19849	6.44347	3.82774	3.86132	1
0	ENSG00000177432	0	0	0	0		0	0	0	0	0	0	0	14468	0.00298603	0.000891602	2.41831	2.41831	PAX7 up vs OCT4	1.54899	3.77552	4.28258	9.39866	3.99241	2.7611	1
0	ENSG00000177600	0	0	0	0		0	0	0	0	0	0	0	14506	0.0095597	0.00788948	1638410000000000	1638410000000000	PAX7 up vs OCT4	53888	4.98141e+25	3.13546	6.79273	8471.8	8106.71	1
0	ENSG00000177606	0	0	0	0		0	0	0	0	0	0	0	14508	0.0167424	0.00636633	11629700000000	11629700000000	PAX7 up vs OCT4	23559.6	5.74073e+21	3.24688	5.69473	4884.48	5575.18	1
0	ENSG00000177688	0	0	0	0		0	0	0	0	0	0	0	14525	0.00920053	0.00336432	2.19213	2.19213	PAX7 up vs OCT4	1.36493	3.52063	3.579	6.87128	3.30144	3.12305	1
0	ENSG00000177990	0	0	0	0		0	0	0	0	0	0	0	14583	0.00615634	0.00199796	2.66801	2.66801	PAX7 up vs OCT4	1.53885	4.62574	3.85252	7.72386	5.0069	4.21355	1
0	ENSG00000178162	0	0	0	0		0	0	0	0	0	0	0	14616	0.00098977	0.000304343	2.07169	2.07169	PAX7 up vs OCT4	1.5	2.86128	4.87309	12.3425	2.75475	1.45075	1
0	ENSG00000178184	0	0	0	0		0	0	0	0	0	0	0	14622	0.00813893	0.00351599	2.23708	2.23708	PAX7 up vs OCT4	1.37163	3.64859	3.55597	7.12588	3.64997	3.32939	1
0	ENSG00000178229	0	0	0	0		0	0	0	0	0	0	0	14634	0.024898	0.00915418	2.01763	2.01763	PAX7 up vs OCT4	1.22884	3.31272	3.05821	4.97248	2.61701	3.42094	1
0	ENSG00000178977	0	0	0	0		0	0	0	0	0	0	0	14769	0.00065286	0.000220489	2.22611	2.22611	PAX7 up vs OCT4	1.5813	3.13385	5.05503	13.5882	3.40222	1.62747	1
0	ENSG00000179008	0	0	0	0		0	0	0	0	0	0	0	14777	2.79388e-06	6.47688e-07	2.48356	2.48356	PAX7 up vs OCT4	1.99355	3.09401	8.94217	39.9882	4.13452	0.672057	1
0	ENSG00000179388	0	0	0	0		0	0	0	0	0	0	0	14860	0.0133401	0.00942139	12.5299	12.5299	PAX7 up vs OCT4	2.08224	75.3995	3.04326	6.12846	42.2532	44.8148	1
0	ENSG00000179454	0	0	0	0		0	0	0	0	0	0	0	14875	0.0106716	0.00327324	5.75956	5.75956	PAX7 up vs OCT4	2.01017	16.5023	3.59335	6.5696	15.5824	15.4173	1
0	ENSG00000179542	0	0	0	0		0	0	0	0	0	0	0	14888	0.000730266	0.000196949	8.09268	8.09268	PAX7 up vs OCT4	3.34871	19.5572	5.11936	13.2449	22.0749	10.8334	1
0	ENSG00000179743	0	0	0	0		0	0	0	0	0	0	0	14917	0.00028314	9.06144e-05	2.11417	2.11417	PAX7 up vs OCT4	1.58142	2.82639	5.57074	16.3433	2.94902	1.17287	1
0	ENSG00000179859	0	0	0	0		0	0	0	0	0	0	0	14940	0.000414528	0.000115534	2.55642	2.55642	PAX7 up vs OCT4	1.75948	3.71433	5.42771	15.0422	4.49403	1.94195	1
0	ENSG00000180178	0	0	0	0		0	0	0	0	0	0	0	15006	0.00194113	0.000516257	6.01887	6.01887	PAX7 up vs OCT4	2.58113	14.0352	4.57988	10.4877	16.0933	9.97416	1
0	ENSG00000180346	0	0	0	0		0	0	0	0	0	0	0	15041	0.00339577	0.000935475	4.525	4.525	PAX7 up vs OCT4	2.10319	9.73551	4.2567	9.08724	11.4185	8.16752	1
0	ENSG00000180354	0	0	0	0		0	0	0	0	0	0	0	15044	0.000675129	0.000186936	51.7544	51.7544	PAX7 up vs OCT4	9.88217	271.045	5.14919	13.4848	79.1376	38.1462	1
0	ENSG00000180488	0	0	0	0		0	0	0	0	0	0	0	15070	0.0160558	0.00503942	2.14889	2.14889	PAX7 up vs OCT4	1.31566	3.50982	3.36838	5.77355	2.9748	3.3491	1
0	ENSG00000180616	0	0	0	0		0	0	0	0	0	0	0	15088	0.0121103	0.00390879	8.83507	8.83507	PAX7 up vs OCT4	2.30293	33.8953	3.5007	6.31778	24.4485	25.1536	1
0	ENSG00000180626	0	0	0	0		0	0	0	0	0	0	0	15089	0.0135585	0.00402966	6.25995	6.25995	PAX7 up vs OCT4	2.00792	19.5161	3.48482	6.09695	16.8741	17.9896	1
0	ENSG00000180999	0	0	0	0		0	0	0	0	0	0	0	15170	0.00868143	0.00248717	4.45755	4.45755	PAX7 up vs OCT4	1.87878	10.5759	3.73724	6.99128	11.1711	10.3861	1
0	ENSG00000181004	0	0	0	0		0	0	0	0	0	0	0	15172	0.000375675	9.94522e-05	2.55056	2.55056	PAX7 up vs OCT4	1.76754	3.68048	5.51575	15.3708	4.42509	1.87128	1
0	ENSG00000181201	0	0	0	0		0	0	0	0	0	0	0	15208	0.00079832	0.000234055	176.041	176.041	PAX7 up vs OCT4	19.0295	1628.54	5.02114	12.9761	137.477	68.8653	1
0	ENSG00000181444	0	0	0	0		0	0	0	0	0	0	0	15247	0.022508	0.00687631	2.32765	2.32765	PAX7 up vs OCT4	1.31745	4.11245	3.20685	5.15199	3.57254	4.50729	1
0	ENSG00000181458	0	0	0	0		0	0	0	0	0	0	0	15250	0.0155185	0.00482877	17.8737	17.8737	PAX7 up vs OCT4	2.84674	112.223	3.3906	5.83798	42.1783	46.9613	1
0	ENSG00000182405	0	0	0	0		0	0	0	0	0	0	0	15455	0.000252537	6.38207e-05	2.44927	2.44927	PAX7 up vs OCT4	1.75239	3.42327	5.78013	16.7489	4.01894	1.55969	1
0	ENSG00000182533	0	0	0	0		0	0	0	0	0	0	0	15479	0.0288612	0.0107591	57.7994	57.7994	PAX7 up vs OCT4	3.03477	1100.83	2.97422	4.71471	87.6402	120.826	1
0	ENSG00000183060	0	0	0	0		0	0	0	0	0	0	0	15616	0.000180739	4.54322e-05	2.61817	2.61817	PAX7 up vs OCT4	1.84995	3.70541	5.98673	17.9766	4.64193	1.67843	1
0	ENSG00000183558	0	0	0	0		0	0	0	0	0	0	0	15737	0.00574521	0.00170868	20.9904	20.9904	PAX7 up vs OCT4	3.94682	111.634	3.93518	7.87592	47.0836	38.8581	1
0	ENSG00000183628	0	0	0	0		0	0	0	0	0	0	0	15760	0.000187998	4.99139e-05	2.19371	2.19371	PAX7 up vs OCT4	1.64766	2.92074	5.92917	17.8288	3.12696	1.14002	1
0	ENSG00000183657	0	0	0	0		0	0	0	0	0	0	0	15773	0.000265869	8.53208e-05	2.20289	2.20289	PAX7 up vs OCT4	1.6249	2.98649	5.60644	16.5656	3.28418	1.28864	1
0	ENSG00000183718	0	0	0	0		0	0	0	0	0	0	0	15794	0.00516258	0.00253705	2.04578	2.04578	PAX7 up vs OCT4	1.35101	3.09783	3.72681	8.11437	2.99038	2.39544	1
0	ENSG00000183741	0	0	0	0		0	0	0	0	0	0	0	15802	0.0035126	0.000983828	33.3063	33.3063	PAX7 up vs OCT4	5.55724	199.616	4.22959	9.00633	61.8162	44.6137	1
0	ENSG00000183891	0	0	0	0		0	0	0	0	0	0	0	15848	0.00313826	0.00167044	3.23874	3.23874	PAX7 up vs OCT4	1.7023	6.16192	3.94717	9.2775	8.21603	5.75632	1
0	ENSG00000184058	0	0	0	0		0	0	0	0	0	0	0	15882	0.0244147	0.0108573	12.0487	12.0487	PAX7 up vs OCT4	1.97031	73.6795	2.9695	5.00713	35.1437	45.6218	1
0	ENSG00000184557	0	0	0	0		0	0	0	0	0	0	0	16006	0.00134904	0.000450448	2949.12	2949.12	PAX7 up vs OCT4	72.3451	120219	4.65497	11.4659	337.425	191.286	1
0	ENSG00000184887	0	0	0	0		0	0	0	0	0	0	0	16085	0.00750687	0.00212551	5.20741	5.20741	PAX7 up vs OCT4	2.04801	13.2408	3.81989	7.2964	13.6022	12.1175	1
0	ENSG00000185008	0	0	0	0		0	0	0	0	0	0	0	16123	0.000229309	5.92682e-05	2.38627	2.38627	PAX7 up vs OCT4	1.72833	3.29468	5.82481	17.0966	3.80808	1.44781	1
0	ENSG00000185019	0	0	0	0		0	0	0	0	0	0	0	16128	0.000473181	0.000165398	2.24962	2.24962	PAX7 up vs OCT4	1.60831	3.14666	5.21946	14.608	3.52142	1.56689	1
0	ENSG00000185420	0	0	0	0		0	0	0	0	0	0	0	16240	0.00153413	0.000419611	2.31081	2.31081	PAX7 up vs OCT4	1.57163	3.39764	4.69417	11.114	3.5352	2.06756	1
0	ENSG00000186051	0	0	0	0		0	0	0	0	0	0	0	16410	0.00177922	0.000917707	2.21569	2.21569	PAX7 up vs OCT4	1.48109	3.31466	4.26703	10.7169	3.72186	2.25738	1
0	ENSG00000186314	0	0	0	0		0	0	0	0	0	0	0	16488	0.00640913	0.00307332	2.10986	2.10986	PAX7 up vs OCT4	1.35232	3.29176	3.62631	7.63608	3.23396	2.75282	1
0	ENSG00000186615	0	0	0	0		0	0	0	0	0	0	0	16564	0.0225254	0.00686797	2.02724	2.02724	PAX7 up vs OCT4	1.25948	3.26301	3.20748	5.1506	2.49781	3.15221	1
0	ENSG00000186684	0	0	0	0		0	0	0	0	0	0	0	16580	0.00163469	0.000704484	2.97892	2.97892	PAX7 up vs OCT4	1.74514	5.08497	4.41007	10.9428	6.69769	3.97842	1
0	ENSG00000186998	0	0	0	0		0	0	0	0	0	0	0	16652	0.0170484	0.00627536	4.52048	4.52048	PAX7 up vs OCT4	1.66053	12.3061	3.25436	5.66079	12.1533	13.955	1
0	ENSG00000187486	0	0	0	0		0	0	0	0	0	0	0	16740	0.00196816	0.000526025	2.21431	2.21431	PAX7 up vs OCT4	1.52062	3.22447	4.56958	10.4516	3.16004	1.96526	1
0	ENSG00000187605	0	0	0	0		0	0	0	0	0	0	0	16772	0.0261479	0.0121045	4.48376	4.48376	PAX7 up vs OCT4	1.47349	13.6438	2.9129	4.88636	12.9531	17.2307	1
0	ENSG00000187987	0	0	0	0		0	0	0	0	0	0	0	16881	0.023646	0.0107064	2.12714	2.12714	PAX7 up vs OCT4	1.22999	3.67868	2.97678	5.0639	3.25254	4.17495	1
0	ENSG00000188176	0	0	0	0		0	0	0	0	0	0	0	16936	0.00282982	0.000818118	6.11354	6.11354	PAX7 up vs OCT4	2.47684	15.0899	4.32902	9.53062	16.6545	11.3586	1
0	ENSG00000188785	0	0	0	0		0	0	0	0	0	0	0	17100	0.0100576	0.00299641	12.1305	12.1305	PAX7 up vs OCT4	2.75748	53.3635	3.63957	6.6893	31.4241	30.5348	1
0	ENSG00000188895	0	0	0	0		0	0	0	0	0	0	0	17130	0.0304568	0.010376	5.42946	5.42946	PAX7 up vs OCT4	1.6011	18.4117	2.99308	4.62225	14.7545	20.7484	1
0	ENSG00000189227	0	0	0	0		0	0	0	0	0	0	0	17218	0.00132515	0.000532607	4.52319	4.52319	PAX7 up vs OCT4	2.21363	9.24239	4.56276	11.5153	12.5868	7.10481	1
0	ENSG00000196104	0	0	0	0		0	0	0	0	0	0	0	17288	0.000296152	0.000159646	5.91871	5.91871	PAX7 up vs OCT4	2.84342	12.3201	5.23986	16.186	18.6214	7.47802	1
0	ENSG00000196220	0	0	0	0		0	0	0	0	0	0	0	17334	0.00104248	0.000275899	2.28238	2.28238	PAX7 up vs OCT4	1.58958	3.27714	4.92822	12.1927	3.41547	1.82081	1
0	ENSG00000196369	0	0	0	0		0	0	0	0	0	0	0	17391	0.024807	0.010165	10.4232	10.4232	PAX7 up vs OCT4	1.93123	56.2557	3.00377	4.97894	30.2916	39.5456	1
0	ENSG00000196372	0	0	0	0		0	0	0	0	0	0	0	17393	0.00560575	0.00164302	8.26616	8.26616	PAX7 up vs OCT4	2.6083	26.1969	3.95594	7.93037	22.5861	18.5124	1
0	ENSG00000196712	0	0	0	0		0	0	0	0	0	0	0	17522	0.0261616	0.00994482	3.46159	3.46159	PAX7 up vs OCT4	1.42194	8.4269	3.01515	4.88543	8.27803	11.0138	1
0	ENSG00000196890	0	0	0	0		0	0	0	0	0	0	0	17575	0.00329655	0.000992052	1.78067e+19	1.78067e+19	PAX7 up vs OCT4	2555420000	1.2408e+29	4.22512	9.1585	10070.6	7147.35	1
0	ENSG00000197050	0	0	0	0		0	0	0	0	0	0	0	17631	0.00585278	0.00197115	4.6783	4.6783	PAX7 up vs OCT4	1.97251	11.0958	3.85965	7.83495	12.5091	10.3777	1
0	ENSG00000197157	0	0	0	0		0	0	0	0	0	0	0	17671	0.015165	0.00518817	729.021	729.021	PAX7 up vs OCT4	10.4325	50943.8	3.35325	5.8818	227.072	250.938	1
0	ENSG00000197177	0	0	0	0		0	0	0	0	0	0	0	17680	4.94653e-06	1.74713e-06	2.00997	2.00997	PAX7 up vs OCT4	1.6716	2.41683	8.18174	36.077	2.62416	0.472796	1
0	ENSG00000197608	0	0	0	0		0	0	0	0	0	0	0	17825	0.00231048	0.00300808	5.15546	5.15546	PAX7 up vs OCT4	1.94646	13.6549	3.63754	10.0386	20.3875	13.201	1
0	ENSG00000197763	0	0	0	0		0	0	0	0	0	0	0	17874	5.61905e-05	1.4528e-05	2.56814	2.56814	PAX7 up vs OCT4	1.89538	3.4797	6.70795	22.7962	4.50261	1.28385	1
0	ENSG00000197776	0	0	0	0		0	0	0	0	0	0	0	17881	0.00178071	0.000701924	2.1831	2.1831	PAX7 up vs OCT4	1.48951	3.19964	4.41204	10.7147	3.35202	2.03349	1
0	ENSG00000198075	0	0	0	0		0	0	0	0	0	0	0	17995	0.000270369	7.46211e-05	4.38034	4.38034	PAX7 up vs OCT4	2.49909	7.67773	5.68629	16.5061	11.1279	4.38209	1
0	ENSG00000198563	0	0	0	0		0	0	0	0	0	0	0	18158	0.0185761	0.0056583	15.0906	15.0906	PAX7 up vs OCT4	2.56424	88.8081	3.30815	5.50129	36.9936	43.7094	1
0	ENSG00000198642	0	0	0	0		0	0	0	0	0	0	0	18182	0.0332144	0.0109432	7.85412	7.85412	PAX7 up vs OCT4	1.74983	35.2533	2.9654	4.47492	21.5964	31.3697	1
0	ENSG00000198719	0	0	0	0		0	0	0	0	0	0	0	18215	0.00243558	0.00065383	86.6598	86.6598	PAX7 up vs OCT4	9.93557	755.863	4.45066	9.90493	99.4605	65.2698	1
0	ENSG00000198879	0	0	0	0		0	0	0	0	0	0	0	18308	0.000460062	0.000132445	2.47391	2.47391	PAX7 up vs OCT4	1.71583	3.56692	5.34802	14.6995	4.21281	1.86287	1
0	ENSG00000198914	0	0	0	0		0	0	0	0	0	0	0	18328	0.0219053	0.00703507	2.86128	2.86128	PAX7 up vs OCT4	1.40555	5.82469	3.19499	5.20074	5.62526	7.03056	1
0	ENSG00000198947	0	0	0	0		0	0	0	0	0	0	0	18349	0.00176184	0.000508985	4.9415	4.9415	PAX7 up vs OCT4	2.32871	10.4858	4.58767	10.7429	13.0167	7.87577	1
0	ENSG00000201699	0	0	0	0		0	0	0	0	0	0	0	19600	0.00575072	0.00160749	104.809	104.809	PAX7 up vs OCT4	8.32276	1319.88	3.96753	7.8738	108.153	89.2832	1
0	ENSG00000203280	0	0	0	0		0	0	0	0	0	0	0	20011	0.00426615	0.00156375	2.79544	2.79544	PAX7 up vs OCT4	1.60046	4.88264	3.98216	8.54954	5.69209	4.32756	1
0	ENSG00000203778	0	0	0	0		0	0	0	0	0	0	0	20190	0.0244873	0.00829666	5.77772	5.77772	PAX7 up vs OCT4	1.70798	19.5447	3.10932	5.00188	15.9022	20.6651	1
0	ENSG00000203943	0	0	0	0		0	0	0	0	0	0	0	20258	0.0043601	0.00123363	2.41075	2.41075	PAX7 up vs OCT4	1.51775	3.82918	4.10838	8.49919	3.89522	2.97898	1
0	ENSG00000204186	0	0	0	0		0	0	0	0	0	0	0	20337	0.00804102	0.00293325	71.6867	71.6867	PAX7 up vs OCT4	5.7208	898.297	3.65073	7.15127	97.8452	88.9343	1
0	ENSG00000205485	0	0	0	0		0	0	0	0	0	0	0	20808	0.0327915	0.0109413	2.01787	2.01787	PAX7 up vs OCT4	1.20998	3.36519	2.96549	4.49658	2.51772	3.63947	1
0	ENSG00000206573	0	0	0	0		0	0	0	0	0	0	0	21035	0.0173603	0.00518175	2.70806	2.70806	PAX7 up vs OCT4	1.4255	5.14457	3.3539	5.62693	4.96002	5.72961	1
0	ENSG00000206633	0	0	0	0		0	0	0	0	0	0	0	21077	0.00681022	0.0115215	142.163	142.163	PAX7 up vs OCT4	3.71639	5438.14	2.9386	7.50468	213.342	184.781	1
0	ENSG00000212127	0	0	0	0		0	0	0	0	0	0	0	22573	0.0191666	0.00927142	2.68074	2.68074	PAX7 up vs OCT4	1.33375	5.38812	3.0516	5.44366	5.67889	6.78088	1
0	ENSG00000212232	0	0	0	0		0	0	0	0	0	0	0	22629	0.0132882	0.00407533	7.70308e+166	7.70308e+166	PAX7 up vs OCT4	1.78972e+63	3.31546e+270	3.47895	6.13604	747924	792288	1
0	ENSG00000212456	0	0	0	0		0	0	0	0	0	0	0	22757	0.00355618	0.00219345	770.272	770.272	PAX7 up vs OCT4	17.6591	33598.5	3.80332	8.97694	273.912	198.333	1
0	ENSG00000213073	0	0	0	0		0	0	0	0	0	0	0	22957	0.000550138	0.000319301	2.02375	2.02375	PAX7 up vs OCT4	1.47801	2.77101	4.84622	14.1243	2.98588	1.3741	1
0	ENSG00000213965	0	0	0	0		0	0	0	0	0	0	0	23445	0.000842748	0.000267136	3.5978	3.5978	PAX7 up vs OCT4	2.05677	6.29347	4.9464	12.8145	8.57732	4.35075	1
0	ENSG00000214029	0	0	0	0		0	0	0	0	0	0	0	23480	0.00534602	0.00148679	2.68005	2.68005	PAX7 up vs OCT4	1.57552	4.55892	4.00896	8.03607	4.85488	3.92689	1
0	ENSG00000215252	0	0	0	0		0	0	0	0	0	0	0	23965	0.00405082	0.00397102	8.08286	8.08286	PAX7 up vs OCT4	2.21903	29.442	3.49246	8.66993	31.012	23.2502	1
0	ENSG00000215808	0	0	0	0		0	0	0	0	0	0	0	24131	0.0338913	0.0123435	4.46892	4.46892	PAX7 up vs OCT4	1.46651	13.6182	2.90271	4.44091	11.8027	17.2752	1
0	ENSG00000221818	0	0	0	0		0	0	0	0	0	0	0	25483	1.9585e-05	9.96127e-06	2.0084	2.0084	PAX7 up vs OCT4	1.61736	2.494	6.95703	27.9535	2.80587	0.652448	1
0	ENSG00000221926	0	0	0	0		0	0	0	0	0	0	0	25524	0.00160526	0.000425414	4.19293	4.19293	PAX7 up vs OCT4	2.16549	8.11857	4.68657	10.9916	10.2725	6.07474	1
0	ENSG00000221990	0	0	0	0		0	0	0	0	0	0	0	25552	0.000142992	3.72546e-05	2.24329	2.24329	PAX7 up vs OCT4	1.68578	2.98518	6.10907	18.8749	3.29827	1.13584	1
0	ENSG00000222724	0	0	0	0		0	0	0	0	0	0	0	25918	0.0200494	0.00685096	11862600	11862600	PAX7 up vs OCT4	204.807	687093000000	3.20877	5.36119	1380.25	1673.44	1
0	ENSG00000223969	0	0	0	0		0	0	0	0	0	0	0	26634	0.0166457	0.00504143	3.66624	3.66624	PAX7 up vs OCT4	1.5934	8.43558	3.36818	5.7056	8.48069	9.66148	1
0	ENSG00000224531	0	0	0	0		0	0	0	0	0	0	0	27035	0.00826035	0.00235409	18.468	18.468	PAX7 up vs OCT4	3.46708	98.3734	3.76614	7.09487	42.4943	38.9313	1
0	ENSG00000224568	0	0	0	0		0	0	0	0	0	0	0	27062	0.0236962	0.0072674	2.3972	2.3972	PAX7 up vs OCT4	1.32311	4.34324	3.17812	5.06014	3.82591	4.91458	1
0	ENSG00000227825	0	0	0	0		0	0	0	0	0	0	0	29428	0.000386217	9.95241e-05	2.0437	2.0437	PAX7 up vs OCT4	1.54464	2.70401	5.51533	15.2779	2.56351	1.09065	1
0	ENSG00000227911	0	0	0	0		0	0	0	0	0	0	0	29484	0.0111548	0.00335077	2.99067	2.99067	PAX7 up vs OCT4	1.54437	5.79139	3.58111	6.48087	6.05911	6.077	1
0	ENSG00000229206	0	0	0	0		0	0	0	0	0	0	0	30382	0.0056665	0.0021661	18.755	18.755	PAX7 up vs OCT4	3.55806	98.8597	3.80993	7.90646	46.7634	38.4448	1
0	ENSG00000229801	0	0	0	0		0	0	0	0	0	0	0	30813	0.0157979	0.00557196	4.61064	4.61064	PAX7 up vs OCT4	1.70349	12.4791	3.31614	5.80416	12.3174	13.7941	1
0	ENSG00000230847	0	0	0	0		0	0	0	0	0	0	0	31591	0.00814843	0.002418	3.24785	3.24785	PAX7 up vs OCT4	1.64827	6.39975	3.75206	7.12344	7.01498	6.40103	1
0	ENSG00000231242	0	0	0	0		0	0	0	0	0	0	0	31876	0.00618271	0.00175852	2.42228	2.42228	PAX7 up vs OCT4	1.48755	3.94438	3.91996	7.71451	3.92588	3.30782	1
0	ENSG00000232116	0	0	0	0		0	0	0	0	0	0	0	32502	0.00870506	0.00252833	4.35715	4.35715	PAX7 up vs OCT4	1.85715	10.2225	3.72862	6.98564	10.8745	10.1185	1
0	ENSG00000233184	0	0	0	0		0	0	0	0	0	0	0	33280	0.0265213	0.00916873	2.11911	2.11911	PAX7 up vs OCT4	1.2465	3.6026	3.05739	4.86154	2.93048	3.91813	1
0	ENSG00000233639	0	0	0	0		0	0	0	0	0	0	0	33613	0.00828294	0.00547171	2.44408	2.44408	PAX7 up vs OCT4	1.36769	4.36761	3.32558	7.08916	5.1145	4.68945	1
0	ENSG00000234329	0	0	0	0		0	0	0	0	0	0	0	34121	0.0233107	0.0102818	2.38857	2.38857	PAX7 up vs OCT4	1.27537	4.47345	2.99783	5.08934	4.28917	5.47804	1
0	ENSG00000234882	0	0	0	0		0	0	0	0	0	0	0	34516	0.000912611	0.000242629	2.27327	2.27327	PAX7 up vs OCT4	1.59432	3.24135	5.00076	12.5793	3.38915	1.75125	1
0	ENSG00000235501	0	0	0	0		0	0	0	0	0	0	0	34967	0.00228548	0.0012666	11.867	11.867	PAX7 up vs OCT4	3.21708	43.7744	4.0943	10.0663	36.7126	23.7061	1
0	ENSG00000236047	0	0	0	0		0	0	0	0	0	0	0	35346	0.00565775	0.00173059	2.49691	2.49691	PAX7 up vs OCT4	1.50959	4.12996	3.92844	7.90988	4.28759	3.52335	1
0	ENSG00000236404	0	0	0	0		0	0	0	0	0	0	0	35607	0.0126042	0.004204	2.44026	2.44026	PAX7 up vs OCT4	1.39868	4.25748	3.46275	6.23918	4.13721	4.31015	1
0	ENSG00000237560	0	0	0	0		0	0	0	0	0	0	0	36456	0.0128781	0.00388574	2.58877	2.58877	PAX7 up vs OCT4	1.44008	4.65371	3.50378	6.19712	4.56282	4.78582	1
0	ENSG00000237877	0	0	0	0		0	0	0	0	0	0	0	36692	0.00883662	0.00256309	2.52729	2.52729	PAX7 up vs OCT4	1.47539	4.32916	3.72145	6.95455	4.31254	4.03067	1
0	ENSG00000238057	0	0	0	0		0	0	0	0	0	0	0	36822	0.000261505	9.03294e-05	2.19968	2.19968	PAX7 up vs OCT4	1.62045	2.98596	5.5726	16.6244	3.32364	1.29952	1
0	ENSG00000239351	0	0	0	0		0	0	0	0	0	0	0	37821	0.00850334	0.00247587	2.35233	2.35233	PAX7 up vs OCT4	1.43511	3.85578	3.73963	7.03437	3.67709	3.39775	1
0	ENSG00000240184	0	0	0	0		0	0	0	0	0	0	0	38182	0.036203	0.0122308	5.29935	5.29935	PAX7 up vs OCT4	1.53497	18.2956	2.90749	4.33041	14.2318	21.3621	1
0	ENSG00000240891	0	0	0	0		0	0	0	0	0	0	0	38490	0.00025712	6.42383e-05	2.41683	2.41683	PAX7 up vs OCT4	1.73743	3.3619	5.7762	16.6846	3.89054	1.51568	1
0	ENSG00000242516	0	0	0	0		0	0	0	0	0	0	0	39210	0.00653035	0.00321669	2.16188	2.16188	PAX7 up vs OCT4	1.36155	3.43262	3.60246	7.59538	3.47555	2.97432	1
0	ENSG00000244486	0	0	0	0		0	0	0	0	0	0	0	40092	0.0234557	0.00767939	3.87452	3.87452	PAX7 up vs OCT4	1.53014	9.81077	3.14948	5.07829	9.38293	12.0098	1
0	ENSG00000248092	0	0	0	0		0	0	0	0	0	0	0	40448	0.00223336	0.000604575	2.28237	2.28237	PAX7 up vs OCT4	1.53489	3.39387	4.49338	10.1252	3.41177	2.19024	1
0	ENSG00000249456	0	0	0	0		0	0	0	0	0	0	0	41338	0.0155698	0.00481586	2.32251	2.32251	PAX7 up vs OCT4	1.35793	3.97225	3.39199	5.83172	3.59558	4.00761	1
0	ENSG00000249519	0	0	0	0		0	0	0	0	0	0	0	41383	0.00051789	0.000132791	2.45601	2.45601	PAX7 up vs OCT4	1.70824	3.53111	5.3465	14.3169	4.03991	1.83416	1
0	ENSG00000250103	0	0	0	0		0	0	0	0	0	0	0	41759	0.00473687	0.00135525	2.87016	2.87016	PAX7 up vs OCT4	1.63736	5.03118	4.05824	8.30915	5.60348	4.38344	1
0	ENSG00000251312	0	0	0	0		0	0	0	0	0	0	0	42592	0.00907451	0.00286962	2.76458	2.76458	PAX7 up vs OCT4	1.51743	5.03673	3.66221	6.89968	5.31469	5.00682	1
0	ENSG00000251661	0	0	0	0		0	0	0	0	0	0	0	42849	0.000346147	0.000121086	2.33442	2.33442	PAX7 up vs OCT4	1.66299	3.27695	5.40027	15.648	3.85274	1.60038	1
0	ENSG00000251682	0	0	0	0		0	0	0	0	0	0	0	42864	0.0212451	0.00991034	19.4258	19.4258	PAX7 up vs OCT4	2.32168	162.538	3.01696	5.25596	50.7718	62.7889	1
0	ENSG00000251867	0	0	0	0		0	0	0	0	0	0	0	43030	0.0113453	0.00328948	2.10413	2.10413	PAX7 up vs OCT4	1.34492	3.29191	3.59076	6.44709	2.76448	2.78717	1
0	ENSG00000253516	0	0	0	0		0	0	0	0	0	0	0	44536	0.0213325	0.00645688	4.89144	4.89144	PAX7 up vs OCT4	1.69695	14.0995	3.23954	5.24854	12.5916	15.5939	1
0	ENSG00000254202	0	0	0	0		0	0	0	0	0	0	0	45136	0.000532489	0.000163203	10118.1	10118.1	PAX7 up vs OCT4	223.77	457504	5.22716	14.228	442.448	202.13	1
0	ENSG00000254515	0	0	0	0		0	0	0	0	0	0	0	45405	0.000504922	0.000317799	2.51147	2.51147	PAX7 up vs OCT4	1.66626	3.78541	4.84886	14.3982	5.1882	2.34218	1
0	ENSG00000254586	0	0	0	0		0	0	0	0	0	0	0	45471	0.00158505	0.000422411	2.71221	2.71221	PAX7 up vs OCT4	1.71293	4.29442	4.69049	11.0257	4.98442	2.93847	1
0	ENSG00000255198	0	0	0	0		0	0	0	0	0	0	0	46030	0.00461207	0.00150147	5.64748	5.64748	PAX7 up vs OCT4	2.21903	14.373	4.00374	8.3701	15.6347	12.1415	1
0	ENSG00000255374	0	0	0	0		0	0	0	0	0	0	0	46197	0.0103965	0.0031352	2.10339	2.10339	PAX7 up vs OCT4	1.34892	3.27985	3.61588	6.62223	2.79761	2.74597	1
0	ENSG00000255396	0	0	0	0		0	0	0	0	0	0	0	46217	0.0162698	0.00589006	42.2599	42.2599	PAX7 up vs OCT4	3.60899	494.847	3.28729	5.74857	74.4919	84.2292	1
0	ENSG00000255491	0	0	0	0		0	0	0	0	0	0	0	46305	0.00886391	0.00253881	3.09231	3.09231	PAX7 up vs OCT4	1.60711	5.95002	3.72645	6.94817	6.37082	5.95988	1
0	ENSG00000256087	0	0	0	0		0	0	0	0	0	0	0	46634	0.00593853	0.0016892	4.88201	4.88201	PAX7 up vs OCT4	2.04714	11.6426	3.94125	7.80291	12.6166	10.5099	1
0	ENSG00000256188	0	0	0	0		0	0	0	0	0	0	0	46680	0.0211752	0.00840008	4.45348	4.45348	PAX7 up vs OCT4	1.57415	12.5995	3.10288	5.26192	12.1821	15.0485	1
0	ENSG00000257298	0	0	0	0		0	0	0	0	0	0	0	47225	0.000588941	0.000159929	2.80367	2.80367	PAX7 up vs OCT4	1.83272	4.28903	5.23883	13.9092	5.38121	2.51474	1
0	ENSG00000258445	0	0	0	0		0	0	0	0	0	0	0	47871	0.00491419	0.0014128	4.51787	4.51787	PAX7 up vs OCT4	2.01545	10.1273	4.0361	8.22565	11.4726	9.06579	1
0	ENSG00000258708	0	0	0	0		0	0	0	0	0	0	0	48108	0.0370293	0.0117394	2.71617	2.71617	PAX7 up vs OCT4	1.29976	5.67613	2.92884	4.29287	4.99196	7.55851	1
0	ENSG00000258727	0	0	0	0		0	0	0	0	0	0	0	48124	6.48452e-05	1.80012e-05	2.15937	2.15937	PAX7 up vs OCT4	1.67638	2.7815	6.56886	22.1576	3.04023	0.89186	1
0	ENSG00000258738	0	0	0	0		0	0	0	0	0	0	0	48135	0.000118093	4.07798e-05	2.16456	2.16456	PAX7 up vs OCT4	1.64315	2.85143	6.05317	19.6328	3.19218	1.05686	1
0	ENSG00000259291	0	0	0	0		0	0	0	0	0	0	0	48649	0.0275388	0.00856991	4.41116	4.41116	PAX7 up vs OCT4	1.56414	12.4403	3.09248	4.79593	11.0356	14.9568	1
0	ENSG00000259802	0	0	0	0		0	0	0	0	0	0	0	49105	0.00422135	0.0013897	2.02032	2.02032	PAX7 up vs OCT4	1.3877	2.94134	4.04487	8.574	2.58935	1.963	1
0	ENSG00000259820	0	0	0	0		0	0	0	0	0	0	0	49118	0.0053525	0.00163518	2.01439	2.01439	PAX7 up vs OCT4	1.37453	2.9521	3.95848	8.03336	2.512	2.03252	1
0	ENSG00000259917	0	0	0	0		0	0	0	0	0	0	0	49190	0.00987621	0.00337547	2.07681	2.07681	PAX7 up vs OCT4	1.33572	3.22906	3.57727	6.72629	2.80476	2.7104	1
0	ENSG00000260196	0	0	0	0		0	0	0	0	0	0	0	49404	1.77266e-05	4.67127e-06	2.06358	2.06358	PAX7 up vs OCT4	1.6737	2.54428	7.47386	28.486	2.67386	0.610129	1
0	ENSG00000260267	0	0	0	0		0	0	0	0	0	0	0	49455	0.0111274	0.00359767	4.13563	4.13563	PAX7 up vs OCT4	1.74062	9.82605	3.54398	6.48578	10.3975	10.4203	1
0	ENSG00000260293	0	0	0	0		0	0	0	0	0	0	0	49477	0.00181486	0.000494185	3.87499	3.87499	PAX7 up vs OCT4	2.05223	7.31669	4.6039	10.6644	9.2228	5.62131	1
0	ENSG00000261455	0	0	0	0		0	0	0	0	0	0	0	50360	1.12607e-06	3.52342e-07	2.23372	2.23372	PAX7 up vs OCT4	1.85823	2.68509	9.4337	46.9634	3.40519	0.471297	1
0	ENSG00000262074	0	0	0	0		0	0	0	0	0	0	0	50718	0.00194452	0.000544706	99762200000000	99762200000000	PAX7 up vs OCT4	22532600	4.41694e+20	4.55044	10.4832	5255.33	3258.52	1
0	ENSG00000262155	0	0	0	0		0	0	0	0	0	0	0	50748	0.0104726	0.00469185	2.24356	2.24356	PAX7 up vs OCT4	1.34374	3.74594	3.40557	6.60751	3.71656	3.65609	1
0	ENSG00000262202	0	0	0	0		0	0	0	0	0	0	0	50762	0.0012947	0.000431785	3353.17	3353.17	PAX7 up vs OCT4	78.9714	142377	4.67835	11.5799	348.313	195.515	1
0	ENSG00000263072	0	0	0	0		0	0	0	0	0	0	0	50966	0.000191429	4.91228e-05	2.26183	2.26183	PAX7 up vs OCT4	1.68082	3.04369	5.93893	17.7612	3.3513	1.22646	1
0	ENSG00000263244	0	0	0	0		0	0	0	0	0	0	0	51011	0.0065932	0.00307515	46.6075	46.6075	PAX7 up vs OCT4	4.72488	459.75	3.626	7.57463	84.9489	72.897	1
0	ENSG00000263786	0	0	0	0		0	0	0	0	0	0	0	51368	0.0209748	0.00749423	4.35503	4.35503	PAX7 up vs OCT4	1.59381	11.9	3.16215	5.27914	11.4185	14.0592	1
0	ENSG00000264207	0	0	0	0		0	0	0	0	0	0	0	51699	0.0098471	0.00333235	2.3564	2.3564	PAX7 up vs OCT4	1.40561	3.95033	3.58399	6.73229	3.84695	3.71421	1
0	ENSG00000264575	0	0	0	0		0	0	0	0	0	0	0	51983	0.00115113	0.000394725	2.56604	2.56604	PAX7 up vs OCT4	1.66825	3.94698	4.72806	11.9098	4.72677	2.57973	1
0	ENSG00000264885	0	0	0	0		0	0	0	0	0	0	0	52217	0.00251843	0.000823016	2.29667	2.29667	PAX7 up vs OCT4	1.51621	3.47885	4.32579	9.82073	3.6248	2.39913	1
0	ENSG00000265142	0	0	0	0		0	0	0	0	0	0	0	52415	0.00498475	0.00155511	2.44053	2.44053	PAX7 up vs OCT4	1.50461	3.95861	3.9851	8.19339	4.1031	3.25508	1
0	ENSG00000266709	0	0	0	0		0	0	0	0	0	0	0	53599	0.00264605	0.00191256	2.31806	2.31806	PAX7 up vs OCT4	1.45075	3.70387	3.87558	9.69708	4.55902	3.05593	1
0	ENSG00000266753	0	0	0	0		0	0	0	0	0	0	0	53633	0.00763653	0.00237469	3.1646	3.1646	PAX7 up vs OCT4	1.63295	6.13292	3.76155	7.2601	6.80338	6.09109	1
0	ENSG00000266965	0	0	0	0		0	0	0	0	0	0	0	53791	0.0090799	0.00263624	2.04763	2.04763	PAX7 up vs OCT4	1.34848	3.10928	3.70668	6.89846	2.57649	2.42767	1
0	ENSG00000267957	0	0	0	0		0	0	0	0	0	0	0	54607	0.00519634	0.00218188	2.48874	2.48874	PAX7 up vs OCT4	1.48327	4.17581	3.80611	8.09972	4.64382	3.72665	1
0	ENSG00000268518	0	0	0	0		0	0	0	0	0	0	0	54848	0.00436499	0.00153009	110.073	110.073	PAX7 up vs OCT4	8.65464	1399.95	3.99371	8.4966	117.622	89.9823	1
0	ENSG00000268713	0	0	0	0		0	0	0	0	0	0	0	54940	0.0210344	0.00862485	2.37412	2.37412	PAX7 up vs OCT4	1.29688	4.34616	3.08916	5.274	4.12768	5.0872	1
0	ENSG00000269337	0	0	0	0		0	0	0	0	0	0	0	55210	1.02081e-05	2.49563e-06	2.28579	2.28579	PAX7 up vs OCT4	1.82432	2.86399	7.92006	31.5862	3.43826	0.707545	1
0	ENSG00000269688	0	0	0	0		0	0	0	0	0	0	0	55370	0.0212349	0.00646632	2.43027	2.43027	PAX7 up vs OCT4	1.34404	4.39438	3.23878	5.25683	3.94801	4.88166	1
0	ENSG00000269929	0	0	0	0		0	0	0	0	0	0	0	55496	0.0014771	0.000650102	115.233	115.233	PAX7 up vs OCT4	11.5233	1152.32	4.45377	11.2169	127.303	73.7697	1
0	ENSG00000269997	0	0	0	0		0	0	0	0	0	0	0	55555	0.00163106	0.000445797	3.57171	3.57171	PAX7 up vs OCT4	1.97971	6.44393	4.6607	10.9487	8.16095	4.84495	1
0	ENSG00000270081	0	0	0	0		0	0	0	0	0	0	0	55608	0.0104417	0.00311827	5.71561	5.71561	PAX7 up vs OCT4	2.01882	16.1819	3.61871	6.61347	15.3323	15.0692	1
0	ENSG00000270168	0	0	0	0		0	0	0	0	0	0	0	55670	0.0117563	0.00377187	6.50733	6.50733	PAX7 up vs OCT4	2.06103	20.5457	3.5193	6.37641	18.0425	18.3922	1
0	ENSG00000270175	0	0	0	0		0	0	0	0	0	0	0	55677	0.00761362	0.00396805	2.07449	2.07449	PAX7 up vs OCT4	1.32099	3.25781	3.49285	7.26646	3.16855	2.83433	1
0	ENSG00000270640	0	0	0	0		0	0	0	0	0	0	0	55955	0.0200656	0.00763176	2.74924	2.74924	PAX7 up vs OCT4	1.37482	5.49769	3.15271	5.35972	5.50994	6.68217	1
0	ENSG00000271948	0	0	0	0		0	0	0	0	0	0	0	56792	0.000705659	0.000532636	2.40748	2.40748	PAX7 up vs OCT4	1.58818	3.64944	4.56273	13.3493	4.94496	2.40779	1
0	ENSG00000272072	0	0	0	0		0	0	0	0	0	0	0	56872	0.00763578	0.00221777	2.19923	2.19923	PAX7 up vs OCT4	1.40461	3.44339	3.79752	7.26031	3.12405	2.79689	1
0	ENSG00000272145	0	0	0	0		0	0	0	0	0	0	0	56921	0.00147081	0.00458638	2.08803	2.08803	PAX7 up vs OCT4	1.31102	3.32555	3.4174	11.2286	5.20641	3.01388	1
0	ENSG00000272512	0	0	0	0		0	0	0	0	0	0	0	57165	0.00969224	0.00786334	2.66064	2.66064	PAX7 up vs OCT4	1.35621	5.21972	3.13718	6.7646	6.5756	6.31839	1
0	ENSG00000272686	0	0	0	0		0	0	0	0	0	0	0	57269	0.0240551	0.0118924	2.51991	2.51991	PAX7 up vs OCT4	1.27243	4.99044	2.9221	5.03343	5.03059	6.49634	1
0	ENSG00000272768	0	0	0	0		0	0	0	0	0	0	0	57319	0.00860885	0.00260539	2.14201	2.14201	PAX7 up vs OCT4	1.37508	3.33668	3.71286	7.00872	2.94735	2.73342	1
0	ENSG00000273015	0	0	0	0		0	0	0	0	0	0	0	57483	0.0057589	0.00164147	4.77434	4.77434	PAX7 up vs OCT4	2.0333	11.2105	3.95644	7.87065	12.2758	10.138	1
0	ENSG00000273035	0	0	0	0		0	0	0	0	0	0	0	57493	0.0237114	0.0119267	2.19023	2.19023	PAX7 up vs OCT4	1.22639	3.91156	2.9206	5.05899	3.64208	4.6795	1

## Sheet: KO Up Only Vs OCT4
Column #	Column ID	p-value(Attribute)	p-value(KO vs. OCT4)	Ratio(KO vs. OCT4)	Fold-Change(KO vs. OCT4)	Fold-Change(KO vs. OCT4) (Description)	Fold Change(KO vs. OCT4) 95% lower limit	Fold Change(KO vs. OCT4) 95% upper limit	T(KO vs. OCT4)	F(Attribute)	SS(Attribute)	SS(Error)	F(Error)	Column #	p-value(Attribute)	p-value(PAX7 vs. OCT4)	Ratio(PAX7 vs. OCT4)	Fold-Change(PAX7 vs. OCT4)	Fold-Change(PAX7 vs. OCT4) (Description)	Fold Change(PAX7 vs. OCT4) 95% lower limit	Fold Change(PAX7 vs. OCT4) 95% upper limit	T(PAX7 vs. OCT4)	F(Attribute)	SS(Attribute)	SS(Error)	F(Error)
6	ENSG00000000457	0.000668503	0.000188818	2.31904	2.31904	KO up vs OCT4	1.62881	3.30175	5.14346	13.5152	3.61118	1.73677	1	0	0	0	0	0		0	0	0	0	0	0	0
21	ENSG00000001631	0.00612512	0.00171614	22.0448	22.0448	KO up vs OCT4	4.03101	120.559	3.93288	7.73499	47.7982	40.1666	1	0	0	0	0	0		0	0	0	0	0	0	0
26	ENSG00000002586	4.8222e-05	1.48506e-05	231234	231234	KO up vs OCT4	4293.42	12453700	6.69363	23.4937	799.163	221.105	1	0	0	0	0	0		0	0	0	0	0	0	0
31	ENSG00000002822	0.000248715	7.28253e-05	7.17627	7.17627	KO up vs OCT4	3.40057	15.1442	5.70086	16.8035	20.0625	7.76067	1	0	0	0	0	0		0	0	0	0	0	0	0
50	ENSG00000004142	0.0162862	0.00656208	26.5872	26.5872	KO up vs OCT4	2.96569	238.352	3.23115	5.74667	59.1771	66.9347	1	0	0	0	0	0		0	0	0	0	0	0	0
56	ENSG00000004534	0.00846735	0.00378987	1294.44	1294.44	KO up vs OCT4	15.8614	105639	3.51682	7.04321	292.143	269.611	1	0	0	0	0	0		0	0	0	0	0	0	0
81	ENSG00000005075	0.00325193	0.00191991	603457	603457	KO up vs OCT4	360.288	1010750000	3.87355	9.19137	1084.27	766.776	1	0	0	0	0	0		0	0	0	0	0	0	0
91	ENSG00000005238	8.41633e-07	2.30629e-07	2.12394	2.12394	KO up vs OCT4	1.7986	2.50812	9.78781	49.4126	2.92389	0.384624	1	0	0	0	0	0		0	0	0	0	0	0	0
103	ENSG00000005483	0.0264569	0.00832433	33.3761	33.3761	KO up vs OCT4	2.9131	382.397	3.10759	4.86579	61.9408	82.7441	1	0	0	0	0	0		0	0	0	0	0	0	0
118	ENSG00000006007	0.0139913	0.00424556	27.7941	27.7941	KO up vs OCT4	3.48138	221.899	3.45762	6.0362	55.7618	60.0463	1	0	0	0	0	0		0	0	0	0	0	0	0
137	ENSG00000006283	0.00485212	0.00134561	4.98131	4.98131	KO up vs OCT4	2.12063	11.701	4.06204	8.25448	12.886	10.1471	1	0	0	0	0	0		0	0	0	0	0	0	0
159	ENSG00000006712	0.00052053	0.00015128	16400900	16400900	KO up vs OCT4	18102.8	14859100000	5.27093	14.3006	1419.25	645.087	1	0	0	0	0	0		0	0	0	0	0	0	0
164	ENSG00000006756	0.00230368	0.000624703	2.28154	2.28154	KO up vs OCT4	1.53217	3.39741	4.4755	10.0461	3.40921	2.20583	1	0	0	0	0	0		0	0	0	0	0	0	0
166	ENSG00000006788	0.00785177	0.00323994	139.194	139.194	KO up vs OCT4	7.19054	2694.5	3.59869	7.20138	135.345	122.163	1	0	0	0	0	0		0	0	0	0	0	0	0
173	ENSG00000007080	0.00444589	0.00647305	29.9643	29.9643	KO up vs OCT4	3.10099	289.541	3.23825	8.45429	93.1125	71.5887	1	0	0	0	0	0		0	0	0	0	0	0	0
178	ENSG00000007202	0.00133924	0.000518409	34.7013	34.7013	KO up vs OCT4	6.50711	185.056	4.57759	11.486	68.8896	38.985	1	0	0	0	0	0		0	0	0	0	0	0	0
194	ENSG00000007520	0.00290237	0.00105612	334.289	334.289	KO up vs OCT4	16.7168	6684.81	4.19152	9.46831	181.874	124.857	1	0	0	0	0	0		0	0	0	0	0	0	0
236	ENSG00000008952	0.00195987	0.000660986	43.4648	43.4648	KO up vs OCT4	6.94893	271.867	4.44473	10.4627	75.279	46.7676	1	0	0	0	0	0		0	0	0	0	0	0	0
237	ENSG00000008988	0.00562363	0.00181969	3.6103e+59	3.6103e+59	KO up vs OCT4	3.82027e+26	3.41186e+92	3.90188	7.9233	97780.8	80216	1	0	0	0	0	0		0	0	0	0	0	0	0
247	ENSG00000009830	3.1279e-05	1.42073e-05	2.07121	2.07121	KO up vs OCT4	1.63909	2.61726	6.72254	25.5591	2.99565	0.761832	1	0	0	0	0	0		0	0	0	0	0	0	0
250	ENSG00000009954	0.00166486	0.000668758	134739	134739	KO up vs OCT4	429.259	42292900	4.43837	10.8938	770.73	459.873	1	0	0	0	0	0		0	0	0	0	0	0	0
255	ENSG00000010219	0.00226088	0.00106538	2.11256	2.11256	KO up vs OCT4	1.43619	3.10747	4.18684	10.0939	3.21782	2.07213	1	0	0	0	0	0		0	0	0	0	0	0	0
262	ENSG00000010295	0.00104185	0.000288785	2.89568	2.89568	KO up vs OCT4	1.81248	4.62621	4.90255	12.1944	5.72999	3.05425	1	0	0	0	0	0		0	0	0	0	0	0	0
283	ENSG00000011021	0.0126036	0.00379505	2.9264	2.9264	KO up vs OCT4	1.51289	5.66054	3.5161	6.23929	5.81334	6.05626	1	0	0	0	0	0		0	0	0	0	0	0	0
305	ENSG00000011451	0.00726661	0.00222076	10.1294	10.1294	KO up vs OCT4	2.71275	37.823	3.79681	7.36562	27.3672	24.1509	1	0	0	0	0	0		0	0	0	0	0	0	0
333	ENSG00000013288	6.28427e-05	1.52174e-05	2.4826	2.4826	KO up vs OCT4	1.84989	3.3317	6.67773	22.2962	4.13032	1.20411	1	0	0	0	0	0		0	0	0	0	0	0	0
369	ENSG00000015532	5.87075e-05	0.000157761	6.50591	6.50591	KO up vs OCT4	3.009	14.0667	5.24671	22.5994	28.7643	8.27316	1	0	0	0	0	0		0	0	0	0	0	0	0
372	ENSG00000015676	0.0132219	0.00423915	3.76885	3.76885	KO up vs OCT4	1.64539	8.63277	3.45841	6.14576	9.0366	9.55747	1	0	0	0	0	0		0	0	0	0	0	0	0
381	ENSG00000017427	7.51147e-05	7.92542e-05	2.60753	2.60753	KO up vs OCT4	1.80753	3.76159	5.65032	21.5167	6.18466	1.86833	1	0	0	0	0	0		0	0	0	0	0	0	0
430	ENSG00000023041	0.0197892	0.0136547	15.1871	15.1871	KO up vs OCT4	1.9316	119.408	2.85009	5.38506	49.0167	59.1654	1	0	0	0	0	0		0	0	0	0	0	0	0
431	ENSG00000023171	7.69498e-06	2.12384e-05	2.36343	2.36343	KO up vs OCT4	1.77286	3.15074	6.46269	33.2787	5.88902	1.15024	1	0	0	0	0	0		0	0	0	0	0	0	0
435	ENSG00000023318	0.00130421	0.00045802	8.35931	8.35931	KO up vs OCT4	3.11418	22.4386	4.64577	11.5595	24.1251	13.5657	1	0	0	0	0	0		0	0	0	0	0	0	0
448	ENSG00000024422	0.0135978	0.00428679	22.8213	22.8213	KO up vs OCT4	3.22398	161.543	3.45259	6.09135	49.9417	53.2921	1	0	0	0	0	0		0	0	0	0	0	0	0
465	ENSG00000026508	0.00232132	0.00243418	3.01396	3.01396	KO up vs OCT4	1.59588	5.69211	3.74855	10.0267	8.677	5.62506	1	0	0	0	0	0		0	0	0	0	0	0	0
478	ENSG00000028203	0.00252274	0.00067833	113.087	113.087	KO up vs OCT4	11.2765	1134.11	4.43063	9.81643	111.685	73.9531	1	0	0	0	0	0		0	0	0	0	0	0	0
484	ENSG00000029363	0.0190044	0.00605955	8324160000	8324160000	KO up vs OCT4	2351.95	2.94613e+16	3.27254	5.45928	2657.3	3163.86	1	0	0	0	0	0		0	0	0	0	0	0	0
489	ENSG00000029725	0.00588093	0.00167984	579.179	579.179	KO up vs OCT4	17.7635	18884.2	3.9442	7.82437	203.356	168.936	1	0	0	0	0	0		0	0	0	0	0	0	0
500	ENSG00000031698	0.00696417	0.00651108	18232.7	18232.7	KO up vs OCT4	26.0366	12767900	3.2352	7.4566	685.098	597.207	1	0	0	0	0	0		0	0	0	0	0	0	0
501	ENSG00000031823	0.000727128	0.000418475	11.8337	11.8337	KO up vs OCT4	3.79666	36.8839	4.69567	13.258	36.6775	17.9819	1	0	0	0	0	0		0	0	0	0	0	0	0
515	ENSG00000033800	0.000604986	0.000164198	2420.57	2420.57	KO up vs OCT4	96.4757	60732.1	5.22366	13.825	307.309	144.486	1	0	0	0	0	0		0	0	0	0	0	0	0
521	ENSG00000034510	0.000295834	8.14447e-05	8.98847e+307	8.98847e+307	KO up vs OCT4	1.39979e+222	8.98847e+307	5.63408	16.1897	3507110	1408070	1	0	0	0	0	0		0	0	0	0	0	0	0
532	ENSG00000035681	0.00241698	0.000778122	14.1209	14.1209	KO up vs OCT4	3.79842	52.4953	4.35614	9.92429	36.6276	23.9896	1	0	0	0	0	0		0	0	0	0	0	0	0
554	ENSG00000037965	1.80094e-08	1.32129e-08	49.657	49.657	KO up vs OCT4	25.2388	97.6993	12.4662	94.5125	92.6589	6.37252	1	0	0	0	0	0		0	0	0	0	0	0	0
557	ENSG00000038219	0.0045992	0.00142441	108.967	108.967	KO up vs OCT4	8.8233	1345.72	4.03175	8.3765	113.293	87.9135	1	0	0	0	0	0		0	0	0	0	0	0	0
560	ENSG00000038358	0.000658091	0.000207862	7.29483	7.29483	KO up vs OCT4	3.13777	16.9594	5.08859	13.5636	20.6651	9.90324	1	0	0	0	0	0		0	0	0	0	0	0	0
562	ENSG00000038427	8.46587e-06	9.47545e-06	4997290000000000	4997290000000000	KO up vs OCT4	70323900000	3.55112e+20	6.99044	32.6987	8735.18	1736.42	1	0	0	0	0	0		0	0	0	0	0	0	0
563	ENSG00000038532	0.000996989	0.000507873	2.07259	2.07259	KO up vs OCT4	1.47063	2.92094	4.58887	12.3215	3.10495	1.63797	1	0	0	0	0	0		0	0	0	0	0	0	0
578	ENSG00000040487	0.0131965	0.00400179	3.06228	3.06228	KO up vs OCT4	1.53123	6.12422	3.48844	6.14951	6.32344	6.68385	1	0	0	0	0	0		0	0	0	0	0	0	0
615	ENSG00000044459	0.00469964	0.00738871	4.46943	4.46943	KO up vs OCT4	1.61078	12.4014	3.16952	8.32714	18.565	14.4915	1	0	0	0	0	0		0	0	0	0	0	0	0
620	ENSG00000046651	0.00516368	0.00143495	9.84193	9.84193	KO up vs OCT4	2.88689	33.5529	4.02782	8.11389	26.1264	20.9297	1	0	0	0	0	0		0	0	0	0	0	0	0
633	ENSG00000047578	3.20317e-07	7.28712e-08	2.45984	2.45984	KO up vs OCT4	2.05465	2.94494	10.8035	58.3716	4.04801	0.450768	1	0	0	0	0	0		0	0	0	0	0	0	0
655	ENSG00000048544	0.0219451	0.00747698	1197.3	1197.3	KO up vs OCT4	9.46202	151503	3.16335	5.19748	260.684	326.013	1	0	0	0	0	0		0	0	0	0	0	0	0
657	ENSG00000048649	0.0155743	0.00468472	9.66297	9.66297	KO up vs OCT4	2.29265	40.7271	3.40636	5.83117	25.8325	28.7954	1	0	0	0	0	0		0	0	0	0	0	0	0
665	ENSG00000049192	0.00282642	0.000898398	2.78524	2.78524	KO up vs OCT4	1.66048	4.67186	4.27849	9.53359	5.45944	3.72225	1	0	0	0	0	0		0	0	0	0	0	0	0
667	ENSG00000049245	0.0237902	0.00837816	78.4227	78.4227	KO up vs OCT4	3.76722	1632.54	3.10424	5.05309	99.6855	128.229	1	0	0	0	0	0		0	0	0	0	0	0	0
673	ENSG00000049323	0.000614038	0.000272613	9051.03	9051.03	KO up vs OCT4	167.72	488441	4.93497	13.7786	469.162	221.326	1	0	0	0	0	0		0	0	0	0	0	0	0
675	ENSG00000049540	0.0010177	0.000904549	2283.52	2283.52	KO up vs OCT4	45.8417	113749	4.27481	12.262	400.929	212.529	1	0	0	0	0	0		0	0	0	0	0	0	0
697	ENSG00000050767	0.00112043	0.000474876	9.70089	9.70089	KO up vs OCT4	3.35698	28.0333	4.62584	11.9865	28.8935	15.6683	1	0	0	0	0	0		0	0	0	0	0	0	0
735	ENSG00000054267	0.00572714	0.00163379	28.6588	28.6588	KO up vs OCT4	4.59239	178.846	3.95892	7.88289	56.5752	46.6502	1	0	0	0	0	0		0	0	0	0	0	0	0
743	ENSG00000054654	0.00988711	0.00284554	314.079	314.079	KO up vs OCT4	10.6118	9295.81	3.66663	6.72404	165.184	159.68	1	0	0	0	0	0		0	0	0	0	0	0	0
758	ENSG00000055208	0.00259294	0.000839482	689.254	689.254	KO up vs OCT4	26.1416	18173	4.31509	9.74768	223.401	148.969	1	0	0	0	0	0		0	0	0	0	0	0	0
759	ENSG00000055211	0.0252135	0.00943853	9.50454	9.50454	KO up vs OCT4	1.92086	47.0291	3.04231	4.95027	27.0931	35.5749	1	0	0	0	0	0		0	0	0	0	0	0	0
770	ENSG00000056097	0.00499389	0.00239307	175184	175184	KO up vs OCT4	169.339	181230000	3.7575	8.18925	844.712	670.468	1	0	0	0	0	0		0	0	0	0	0	0	0
771	ENSG00000056277	0.00713678	0.00202387	227.958	227.958	KO up vs OCT4	10.7972	4812.83	3.84572	7.40413	147.426	129.424	1	0	0	0	0	0		0	0	0	0	0	0	0
796	ENSG00000058262	0.000730953	0.000198808	363644	363644	KO up vs OCT4	1627.83	81235200	5.11399	13.242	829.3	407.071	1	0	0	0	0	0		0	0	0	0	0	0	0
823	ENSG00000060237	0.020541	0.0134507	611.267	611.267	KO up vs OCT4	4.78703	78054.1	2.85794	5.31708	267.685	327.238	1	0	0	0	0	0		0	0	0	0	0	0	0
825	ENSG00000060339	0.0205356	0.0123819	1080400	1080400	KO up vs OCT4	34.7162	33623000000	2.90109	5.31756	1218.32	1489.23	1	0	0	0	0	0		0	0	0	0	0	0	0
857	ENSG00000062598	4.18751e-05	1.55792e-05	9.19729	9.19729	KO up vs OCT4	4.47902	18.8859	6.66244	24.152	26.7643	7.20304	1	0	0	0	0	0		0	0	0	0	0	0	0
894	ENSG00000064313	0.0103992	0.00451267	29.5757	29.5757	KO up vs OCT4	3.49421	250.335	3.42584	6.6217	64.6612	63.4728	1	0	0	0	0	0		0	0	0	0	0	0	0
905	ENSG00000064655	0.00600091	0.00182089	1613230	1613230	KO up vs OCT4	589.321	4416150000	3.90153	7.77993	1043.25	871.617	1	0	0	0	0	0		0	0	0	0	0	0	0
908	ENSG00000064692	5.27375e-06	1.47613e-06	4.31268	4.31268	KO up vs OCT4	2.94904	6.30686	8.3075	35.6594	11.027	2.01	1	0	0	0	0	0		0	0	0	0	0	0	0
909	ENSG00000064703	0.0278743	0.00863072	12.3968	12.3968	KO up vs OCT4	2.13122	72.1095	3.08881	4.7749	31.6878	43.1361	1	0	0	0	0	0		0	0	0	0	0	0	0
932	ENSG00000065308	0.00178024	0.000511097	12.3258	12.3258	KO up vs OCT4	3.77474	40.2479	4.58539	10.7154	32.1202	19.4843	1	0	0	0	0	0		0	0	0	0	0	0	0
966	ENSG00000065978	0.0235076	0.0101759	4.29234e+65	4.29234e+65	KO up vs OCT4	2.62783e+18	7.01118e+112	3.00321	5.07435	128372	164439	1	0	0	0	0	0		0	0	0	0	0	0	0
970	ENSG00000066044	0.000948807	0.000256515	79.9255	79.9255	KO up vs OCT4	11.8988	536.865	4.96929	12.4654	96.7997	50.4754	1	0	0	0	0	0		0	0	0	0	0	0	0
981	ENSG00000066322	0.0140888	0.00415085	16.9364	16.9364	KO up vs OCT4	2.9083	98.6291	3.46938	6.02282	40.0218	43.1927	1	0	0	0	0	0		0	0	0	0	0	0	0
988	ENSG00000066455	0.00926121	0.00307162	1450.56	1450.56	KO up vs OCT4	18.976	110883	3.6266	6.85776	276.058	261.657	1	0	0	0	0	0		0	0	0	0	0	0	0
1012	ENSG00000067167	0.0199096	0.0100755	20945.5	20945.5	KO up vs OCT4	16.5206	26555500	3.00836	5.37397	587.277	710.331	1	0	0	0	0	0		0	0	0	0	0	0	0
1018	ENSG00000067225	0.00124936	0.000388085	4.82621e+33	4.82621e+33	KO up vs OCT4	2.10529e+18	1.10637e+49	4.73747	11.6793	31273.9	17405.2	1	0	0	0	0	0		0	0	0	0	0	0	0
1026	ENSG00000067596	0.0411199	0.0133097	5.67308	5.67308	KO up vs OCT4	1.53139	21.0161	2.86343	4.12028	15.1255	23.8614	1	0	0	0	0	0		0	0	0	0	0	0	0
1033	ENSG00000067829	0.00014677	4.16464e-05	506.318	506.318	KO up vs OCT4	54.5942	4695.7	6.04021	18.7733	199.346	69.0209	1	0	0	0	0	0		0	0	0	0	0	0	0
1056	ENSG00000068438	0.000729961	0.000245895	664.377	664.377	KO up vs OCT4	39.9264	11055.3	4.99319	13.2462	224.18	110.007	1	0	0	0	0	0		0	0	0	0	0	0	0
1060	ENSG00000068654	0.00106868	0.000372913	10.075	10.075	KO up vs OCT4	3.53084	28.7483	4.75963	12.1214	28.5262	15.2969	1	0	0	0	0	0		0	0	0	0	0	0	0
1061	ENSG00000068697	0.0272384	0.00847944	11425200000	11425200000	KO up vs OCT4	1106.8	1.17939e+17	3.09799	4.815	2688.24	3628.99	1	0	0	0	0	0		0	0	0	0	0	0	0
1063	ENSG00000068745	0.0159969	0.00742479	21.5018	21.5018	KO up vs OCT4	2.6517	174.351	3.16699	5.78048	54.2014	60.9481	1	0	0	0	0	0		0	0	0	0	0	0	0
1076	ENSG00000069011	0.000392715	0.000117689	16.0854	16.0854	KO up vs OCT4	5.3123	48.706	5.4169	15.2221	39.9946	17.0781	1	0	0	0	0	0		0	0	0	0	0	0	0
1084	ENSG00000069329	0.00530779	0.00161089	45.6943	45.6943	KO up vs OCT4	5.6989	366.381	3.96641	8.05213	74.6933	60.2954	1	0	0	0	0	0		0	0	0	0	0	0	0
1107	ENSG00000070018	0.0214925	0.00717111	39.5519	39.5519	KO up vs OCT4	3.26462	479.184	3.18505	5.23504	69.7286	86.5774	1	0	0	0	0	0		0	0	0	0	0	0	0
1128	ENSG00000070476	0.0250272	0.0119014	2.00716	2.00716	KO up vs OCT4	1.19908	3.35984	2.92171	4.96335	2.81975	3.69274	1	0	0	0	0	0		0	0	0	0	0	0	0
1129	ENSG00000070495	0.0145649	0.00440694	2.29379	2.29379	KO up vs OCT4	1.36145	3.86461	3.43819	5.95895	3.47114	3.78631	1	0	0	0	0	0		0	0	0	0	0	0	0
1132	ENSG00000070540	0.00216086	0.000837383	4.2219	4.2219	KO up vs OCT4	2.05325	8.68106	4.31644	10.2098	11.3567	7.23018	1	0	0	0	0	0		0	0	0	0	0	0	0
1135	ENSG00000070614	0.00395947	0.00110896	86.6949	86.6949	KO up vs OCT4	8.56741	877.279	4.16535	8.72326	100.023	74.5308	1	0	0	0	0	0		0	0	0	0	0	0	0
1143	ENSG00000070761	0.000976915	0.000265431	4521.21	4521.21	KO up vs OCT4	114.806	178050	4.95001	12.3804	357.586	187.74	1	0	0	0	0	0		0	0	0	0	0	0	0
1156	ENSG00000071051	0.00084835	0.000537327	410.408	410.408	KO up vs OCT4	23.6919	7109.39	4.55792	12.7948	222.778	113.176	1	0	0	0	0	0		0	0	0	0	0	0	0
1171	ENSG00000071553	0.00925841	0.00314433	4.94959	4.94959	KO up vs OCT4	1.90288	12.8744	3.61436	6.85838	13.4157	12.7146	1	0	0	0	0	0		0	0	0	0	0	0	0
1172	ENSG00000071564	0.00661559	0.00194807	4169.11	4169.11	KO up vs OCT4	39.5411	439581	3.86587	7.56729	351.476	301.904	1	0	0	0	0	0		0	0	0	0	0	0	0
1178	ENSG00000071859	0.00930849	0.00319399	62.0862	62.0862	KO up vs OCT4	5.23423	736.439	3.60616	6.8473	89.662	85.1143	1	0	0	0	0	0		0	0	0	0	0	0	0
1208	ENSG00000072501	0.011124	0.00517659	1397.43	1397.43	KO up vs OCT4	13.171	148265	3.35441	6.4864	302.082	302.715	1	0	0	0	0	0		0	0	0	0	0	0	0
1222	ENSG00000072832	2.03715e-06	1.59752e-06	536.54	536.54	KO up vs OCT4	103.438	2783.07	8.24837	42.3032	245.39	37.7049	1	0	0	0	0	0		0	0	0	0	0	0	0
1226	ENSG00000072864	0.0281553	0.0107206	3.47166	3.47166	KO up vs OCT4	1.40655	8.56875	2.97609	4.75752	8.31307	11.3578	1	0	0	0	0	0		0	0	0	0	0	0	0
1245	ENSG00000073578	0.0213141	0.00771115	5.40383	5.40383	KO up vs OCT4	1.69733	17.2043	3.14733	5.2501	15.0716	18.6597	1	0	0	0	0	0		0	0	0	0	0	0	0
1252	ENSG00000073712	0.00121398	0.000739832	95363	95363	KO up vs OCT4	335.22	27128700	4.38349	11.7598	803.772	444.269	1	0	0	0	0	0		0	0	0	0	0	0	0
1271	ENSG00000074219	0.00675291	0.00365207	56203.6	56203.6	KO up vs OCT4	70.4609	44831200	3.53614	7.5229	718.937	621.182	1	0	0	0	0	0		0	0	0	0	0	0	0
1282	ENSG00000074590	0.000847722	0.00125548	5.57453	5.57453	KO up vs OCT4	2.25383	13.7878	4.09901	12.797	22.4643	11.4103	1	0	0	0	0	0		0	0	0	0	0	0	0
1296	ENSG00000074935	0.000107184	3.1765e-05	5.02869	5.02869	KO up vs OCT4	2.86656	8.82163	6.20828	20.0254	13.5413	4.39534	1	0	0	0	0	0		0	0	0	0	0	0	0
1305	ENSG00000075151	0.0071878	0.00396904	123.634	123.634	KO up vs OCT4	6.28173	2433.31	3.49272	7.3889	140.428	123.534	1	0	0	0	0	0		0	0	0	0	0	0	0
1323	ENSG00000075413	0.00211377	0.000564315	7.64739	7.64739	KO up vs OCT4	2.89909	20.1727	4.53106	10.2665	20.6762	13.0906	1	0	0	0	0	0		0	0	0	0	0	0	0
1338	ENSG00000075785	0.00226384	0.00135264	351823	351823	KO up vs OCT4	393.125	314861000	4.05926	10.0905	997.819	642.764	1	0	0	0	0	0		0	0	0	0	0	0	0
1390	ENSG00000077235	0.000368917	0.000158405	156.356	156.356	KO up vs OCT4	19.5105	1253.03	5.24436	15.432	143.08	60.2656	1	0	0	0	0	0		0	0	0	0	0	0	0
1418	ENSG00000077943	0.0130604	0.00669778	9.80584	9.80584	KO up vs OCT4	2.12023	45.3511	3.22051	6.1697	30.9747	32.633	1	0	0	0	0	0		0	0	0	0	0	0	0
1439	ENSG00000078369	0.00962892	0.00358965	902828	902828	KO up vs OCT4	211.996	3844870000	3.54514	6.77799	1013.23	971.671	1	0	0	0	0	0		0	0	0	0	0	0	0
1450	ENSG00000078674	0.014252	0.00437711	17126.5	17126.5	KO up vs OCT4	37.6874	7782870	3.44172	6.00064	480.951	520.975	1	0	0	0	0	0		0	0	0	0	0	0	0
1451	ENSG00000078687	0.000299617	0.000184007	2.58171	2.58171	KO up vs OCT4	1.73537	3.8408	5.15824	16.1454	5.45338	2.19548	1	0	0	0	0	0		0	0	0	0	0	0	0
1458	ENSG00000078814	0.000276716	0.000134584	2.6831	2.6831	KO up vs OCT4	1.79963	4.00027	5.3387	16.4241	5.60804	2.21943	1	0	0	0	0	0		0	0	0	0	0	0	0
1464	ENSG00000079102	0.000503998	0.000233215	15.1455	15.1455	KO up vs OCT4	4.70616	48.7416	5.02317	14.4041	42.1235	19.0086	1	0	0	0	0	0		0	0	0	0	0	0	0
1473	ENSG00000079277	0.000712239	0.000197049	3.4376	3.4376	KO up vs OCT4	2.04147	5.78852	5.11906	13.321	7.74316	3.7783	1	0	0	0	0	0		0	0	0	0	0	0	0
1480	ENSG00000079387	0.000197813	6.58343e-05	35.49	35.49	KO up vs OCT4	9.3081	135.317	5.76143	17.6391	67.6332	24.9229	1	0	0	0	0	0		0	0	0	0	0	0	0
1498	ENSG00000079974	0.00303927	0.000850564	2.40415	2.40415	KO up vs OCT4	1.54852	3.73254	4.30801	9.35549	3.87522	2.69242	1	0	0	0	0	0		0	0	0	0	0	0	0
1522	ENSG00000080802	0.000506666	0.000195513	14.1314	14.1314	KO up vs OCT4	4.62597	43.1686	5.12354	14.3872	38.4054	17.3513	1	0	0	0	0	0		0	0	0	0	0	0	0
1523	ENSG00000080815	0.0377571	0.0123718	2.52792	2.52792	KO up vs OCT4	1.2673	5.0425	2.90152	4.2606	4.34851	6.63412	1	0	0	0	0	0		0	0	0	0	0	0	0
1596	ENSG00000082805	0.00110453	0.000340105	14.791	14.791	KO up vs OCT4	4.41171	49.5895	4.81094	12.0272	37.6787	20.3632	1	0	0	0	0	0		0	0	0	0	0	0	0
1651	ENSG00000084652	0.0036791	0.00230622	79.8992	79.8992	KO up vs OCT4	6.52092	978.984	3.77694	8.89624	119.568	87.3622	1	0	0	0	0	0		0	0	0	0	0	0	0
1665	ENSG00000085224	0.00128627	0.000346108	117358	117358	KO up vs OCT4	614.333	22419300	4.80118	11.598	684.924	383.859	1	0	0	0	0	0		0	0	0	0	0	0	0
1693	ENSG00000085871	0.00729257	0.00433386	2.02381	2.02381	KO up vs OCT4	1.301	3.14822	3.4469	7.35801	3.07504	2.71646	1	0	0	0	0	0		0	0	0	0	0	0	0
1703	ENSG00000086102	0.0130377	0.00383035	6.11502	6.11502	KO up vs OCT4	2.00703	18.6313	3.51127	6.17309	16.4014	17.2699	1	0	0	0	0	0		0	0	0	0	0	0	0
1710	ENSG00000086289	0.000244138	6.47801e-05	3.8717	3.8717	KO up vs OCT4	2.33253	6.42653	5.77114	16.8702	9.27313	3.5729	1	0	0	0	0	0		0	0	0	0	0	0	0
1730	ENSG00000086991	0.00489808	0.00158771	2.98063	2.98063	KO up vs OCT4	1.64615	5.39694	3.9741	8.2331	6.21196	4.90432	1	0	0	0	0	0		0	0	0	0	0	0	0
1755	ENSG00000087269	0.00748702	0.0022745	2816.67	2816.67	KO up vs OCT4	30.222	262512	3.78422	7.30202	321.427	286.123	1	0	0	0	0	0		0	0	0	0	0	0	0
1763	ENSG00000087448	0.0146053	0.00594541	4.01034	4.01034	KO up vs OCT4	1.60764	10.004	3.28242	5.95364	10.649	11.6263	1	0	0	0	0	0		0	0	0	0	0	0	0
1765	ENSG00000087470	0.00481822	0.00147896	962.394	962.394	KO up vs OCT4	23.8118	38896.7	4.01176	8.2704	242.263	190.403	1	0	0	0	0	0		0	0	0	0	0	0	0
1767	ENSG00000087495	0.000330132	8.77242e-05	2.29969	2.29969	KO up vs OCT4	1.66684	3.17282	5.58995	15.81	3.50561	1.44127	1	0	0	0	0	0		0	0	0	0	0	0	0
1799	ENSG00000088682	0.000310259	8.65252e-05	61.6545	61.6545	KO up vs OCT4	12.5661	302.503	5.59812	16.0241	86.7763	35.1998	1	0	0	0	0	0		0	0	0	0	0	0	0
1810	ENSG00000088833	0.00755687	0.00277146	12.6534	12.6534	KO up vs OCT4	2.85252	56.1286	3.68045	7.28232	34.5951	30.8786	1	0	0	0	0	0		0	0	0	0	0	0	0
1816	ENSG00000088888	0.00372113	0.0035005	17.021	17.021	KO up vs OCT4	3.04513	95.1401	3.55828	8.86936	56.2263	41.2061	1	0	0	0	0	0		0	0	0	0	0	0	0
1861	ENSG00000089505	5.49548e-05	2.32876e-05	6.26392	6.26392	KO up vs OCT4	3.37312	11.6322	6.40398	22.8966	18.7777	5.33071	1	0	0	0	0	0		0	0	0	0	0	0	0
1870	ENSG00000089737	0.000739046	0.00019454	22119300	22119300	KO up vs OCT4	17763.5	27543100000	5.12639	13.2086	1436.19	706.755	1	0	0	0	0	0		0	0	0	0	0	0	0
1872	ENSG00000089818	0.0277808	0.0122664	3.02625	3.02625	KO up vs OCT4	1.32858	6.89321	2.90597	4.78073	6.93509	9.42912	1	0	0	0	0	0		0	0	0	0	0	0	0
1877	ENSG00000089916	0.0302671	0.0115091	2.02747	2.02747	KO up vs OCT4	1.20596	3.4086	2.93916	4.63295	2.6766	3.75525	1	0	0	0	0	0		0	0	0	0	0	0	0
1890	ENSG00000090316	0.0122861	0.00944386	3.43323	3.43323	KO up vs OCT4	1.42975	8.24415	3.04202	6.28939	10.3313	10.6772	1	0	0	0	0	0		0	0	0	0	0	0	0
1897	ENSG00000090447	0.0062179	0.00188431	3.7652	3.7652	KO up vs OCT4	1.80084	7.87227	3.88344	7.70211	8.96856	7.56879	1	0	0	0	0	0		0	0	0	0	0	0	0
1940	ENSG00000091164	0.0040638	0.00114126	8.16555	8.16555	KO up vs OCT4	2.73672	24.3635	4.14998	8.66247	22.1588	16.6272	1	0	0	0	0	0		0	0	0	0	0	0	0
1953	ENSG00000091542	0.0347848	0.0119602	100.693	100.693	KO up vs OCT4	3.3162	3057.43	2.91914	4.3972	109.66	162.101	1	0	0	0	0	0		0	0	0	0	0	0	0
1979	ENSG00000092098	0.00331442	0.00272189	2.25662	2.25662	KO up vs OCT4	1.40125	3.63415	3.68991	9.14549	4.44503	3.15923	1	0	0	0	0	0		0	0	0	0	0	0	0
2011	ENSG00000092978	0.0337398	0.0113436	2.79023	2.79023	KO up vs OCT4	1.31498	5.92052	2.9467	4.44846	5.38924	7.87465	1	0	0	0	0	0		0	0	0	0	0	0	0
2019	ENSG00000093167	0.02087	0.00697588	2.39298	2.39298	KO up vs OCT4	1.32758	4.31336	3.19938	5.28822	3.9295	4.82994	1	0	0	0	0	0		0	0	0	0	0	0	0
2038	ENSG00000095139	0.000219334	0.000126435	6270180	6270180	KO up vs OCT4	11622	3382820000	5.37505	17.2586	1461.95	550.605	1	0	0	0	0	0		0	0	0	0	0	0	0
2063	ENSG00000095787	0.00321597	0.00148557	833.098	833.098	KO up vs OCT4	22.2304	31220.8	4.0094	9.21823	259.11	182.705	1	0	0	0	0	0		0	0	0	0	0	0	0
2101	ENSG00000099246	0.0410894	0.013515	26.0442	26.0442	KO up vs OCT4	2.21114	306.765	2.85545	4.12149	53.6632	84.6321	1	0	0	0	0	0		0	0	0	0	0	0	0
2106	ENSG00000099282	0.0286553	0.00899462	3.12466	3.12466	KO up vs OCT4	1.40058	6.97105	3.06735	4.72707	6.51556	8.95928	1	0	0	0	0	0		0	0	0	0	0	0	0
2108	ENSG00000099290	0.00711348	0.00304529	2.49578	2.49578	KO up vs OCT4	1.44838	4.3006	3.6311	7.41113	4.69744	4.11994	1	0	0	0	0	0		0	0	0	0	0	0	0
2115	ENSG00000099341	0.00651019	0.00263697	437417	437417	KO up vs OCT4	225.466	848616000	3.70654	7.60209	932.64	797.433	1	0	0	0	0	0		0	0	0	0	0	0	0
2122	ENSG00000099617	0.000250828	0.000107867	14.0807	14.0807	KO up vs OCT4	4.95232	40.0352	5.46797	16.7732	39.205	15.1929	1	0	0	0	0	0		0	0	0	0	0	0	0
2139	ENSG00000099817	0.0122313	0.0115007	5.30015	5.30015	KO up vs OCT4	1.55591	18.0548	2.93954	6.29818	20.2536	20.9026	1	0	0	0	0	0		0	0	0	0	0	0	0
2175	ENSG00000099998	1.5452e-06	5.71029e-07	4.82139	4.82139	KO up vs OCT4	3.31093	7.02094	9.04226	44.4232	13.4319	1.96536	1	0	0	0	0	0		0	0	0	0	0	0	0
2179	ENSG00000100014	0.000328349	0.000135297	3.04794	3.04794	KO up vs OCT4	1.94104	4.78605	5.33563	15.8286	6.89913	2.83312	1	0	0	0	0	0		0	0	0	0	0	0	0
2180	ENSG00000100023	0.00127365	0.000541746	3.63738	3.63738	KO up vs OCT4	1.97117	6.71204	4.55343	11.6255	9.34018	5.22224	1	0	0	0	0	0		0	0	0	0	0	0	0
2206	ENSG00000100097	0.00045147	0.000132661	4.4029e+26	4.4029e+26	KO up vs OCT4	7566640000000000	2.56197e+37	5.34707	14.7611	19413.3	8548.58	1	0	0	0	0	0		0	0	0	0	0	0	0
2224	ENSG00000100150	0.000290373	9.379e-05	2.74805	2.74805	KO up vs OCT4	1.85414	4.07293	5.55036	16.2548	5.38692	2.15412	1	0	0	0	0	0		0	0	0	0	0	0	0
2253	ENSG00000100243	0.000969342	0.000563189	78.9039	78.9039	KO up vs OCT4	9.83553	632.993	4.53216	12.4031	115.112	60.3261	1	0	0	0	0	0		0	0	0	0	0	0	0
2265	ENSG00000100285	0.00232713	0.000630823	7.2294	7.2294	KO up vs OCT4	2.77915	18.8058	4.47018	10.0203	19.6038	12.7167	1	0	0	0	0	0		0	0	0	0	0	0	0
2286	ENSG00000100325	0.000134141	0.000229092	3.90871	3.90871	KO up vs OCT4	2.17732	7.01687	5.03329	19.1256	14.016	4.76346	1	0	0	0	0	0		0	0	0	0	0	0	0
2289	ENSG00000100336	3.37147e-05	1.58268e-05	284.954	284.954	KO up vs OCT4	45.4527	1786.44	6.65219	25.1914	181.705	46.8845	1	0	0	0	0	0		0	0	0	0	0	0	0
2296	ENSG00000100348	0.00999312	0.00289281	500.196	500.196	KO up vs OCT4	12.7368	19643.5	3.658	6.70236	193.292	187.456	1	0	0	0	0	0		0	0	0	0	0	0	0
2297	ENSG00000100350	0.000883073	0.00039384	7.71318	7.71318	KO up vs OCT4	3.03348	19.6122	4.7293	12.6761	23.6313	12.1176	1	0	0	0	0	0		0	0	0	0	0	0	0
2311	ENSG00000100380	0.0134425	0.00448049	4243620000000000	4243620000000000	KO up vs OCT4	607354	2.96504e+25	3.42957	6.11362	6724.09	7149.05	1	0	0	0	0	0		0	0	0	0	0	0	0
2318	ENSG00000100403	3.0848e-05	0.000965369	3.11547	3.11547	KO up vs OCT4	1.74602	5.55901	4.23978	25.6276	18.3933	4.66514	1	0	0	0	0	0		0	0	0	0	0	0	0
2326	ENSG00000100425	0.0301966	0.00950122	7.89296	7.89296	KO up vs OCT4	1.81711	34.2845	3.03887	4.63694	21.4114	30.0142	1	0	0	0	0	0		0	0	0	0	0	0	0
2327	ENSG00000100426	0.00630805	0.00196327	6.66444	6.66444	KO up vs OCT4	2.30637	19.2574	3.86176	7.67069	18.488	15.6664	1	0	0	0	0	0		0	0	0	0	0	0	0
2334	ENSG00000100445	0.0124253	0.00367828	3.9468	3.9468	KO up vs OCT4	1.70448	9.13902	3.53241	6.26723	9.45811	9.80939	1	0	0	0	0	0		0	0	0	0	0	0	0
2366	ENSG00000100583	0.00640724	0.0018037	6.68781	6.68781	KO up vs OCT4	2.33825	19.1283	3.90655	7.63672	18.053	15.3658	1	0	0	0	0	0		0	0	0	0	0	0	0
2382	ENSG00000100629	0.0065183	0.00203333	7.34888	7.34888	KO up vs OCT4	2.39498	22.5497	3.84326	7.59939	20.4483	17.4901	1	0	0	0	0	0		0	0	0	0	0	0	0
2410	ENSG00000100815	0.00141985	0.000375419	214.318	214.318	KO up vs OCT4	18.7144	2454.37	4.75591	11.325	144.112	82.713	1	0	0	0	0	0		0	0	0	0	0	0	0
2430	ENSG00000100934	0.0195322	0.00759464	23.2732	23.2732	KO up vs OCT4	2.69762	200.786	3.15524	5.40899	53.7674	64.6125	1	0	0	0	0	0		0	0	0	0	0	0	0
2436	ENSG00000100982	0.00783369	0.00222292	5.09103	5.09103	KO up vs OCT4	2.01642	12.8538	3.7963	7.20625	13.2316	11.9348	1	0	0	0	0	0		0	0	0	0	0	0	0
2465	ENSG00000101138	0.0246859	0.014147	206.658	206.658	KO up vs OCT4	3.53862	12068.9	2.83161	4.98759	176.622	230.179	1	0	0	0	0	0		0	0	0	0	0	0	0
2476	ENSG00000101181	0.000113214	3.24912e-05	3.6186	3.6186	KO up vs OCT4	2.31066	5.66691	6.19416	19.803	8.52901	2.7995	1	0	0	0	0	0		0	0	0	0	0	0	0
2498	ENSG00000101236	0.0060709	0.00176896	2.02502	2.02502	KO up vs OCT4	1.37219	2.98842	3.91683	7.75448	2.51398	2.10728	1	0	0	0	0	0		0	0	0	0	0	0	0
2500	ENSG00000101247	0.00253258	0.000728402	3.16667	3.16667	KO up vs OCT4	1.79622	5.58273	4.39194	9.80666	6.74866	4.47311	1	0	0	0	0	0		0	0	0	0	0	0	0
2504	ENSG00000101266	0.0204801	0.0113365	7751.04	7751.04	KO up vs OCT4	10.9193	5502060	2.94702	5.32248	491.049	599.686	1	0	0	0	0	0		0	0	0	0	0	0	0
2513	ENSG00000101306	1.00395e-05	2.37169e-06	2.35894	2.35894	KO up vs OCT4	1.86863	2.97791	7.95709	31.6839	3.68225	0.755418	1	0	0	0	0	0		0	0	0	0	0	0	0
2533	ENSG00000101365	0.0262711	0.0109793	5333.41	5333.41	KO up vs OCT4	10.2381	2778380	2.96369	4.87812	408.63	544.491	1	0	0	0	0	0		0	0	0	0	0	0	0
2561	ENSG00000101464	0.00105811	0.000519652	141.52	141.52	KO up vs OCT4	13.6603	1466.14	4.57628	12.15	142.16	76.0532	1	0	0	0	0	0		0	0	0	0	0	0	0
2569	ENSG00000101546	0.0104864	0.00313788	5.64442	5.64442	KO up vs OCT4	2.00676	15.876	3.61543	6.60486	15.1203	14.8802	1	0	0	0	0	0		0	0	0	0	0	0	0
2576	ENSG00000101608	0.00554563	0.0015708	23545900	23545900	KO up vs OCT4	2345.15	236408000000	3.97978	7.95433	1445.67	1181.35	1	0	0	0	0	0		0	0	0	0	0	0	0
2593	ENSG00000101825	0.000271217	0.000105251	256.869	256.869	KO up vs OCT4	28.8504	2287.04	5.48239	16.495	168.797	66.5159	1	0	0	0	0	0		0	0	0	0	0	0	0
2632	ENSG00000102024	0.011069	0.00327595	2.72682e+31	2.72682e+31	KO up vs OCT4	3418610000000	2.17503e+50	3.59292	6.4963	26341.4	26356.4	1	0	0	0	0	0		0	0	0	0	0	0	0
2664	ENSG00000102189	0.00442363	0.001224	7.584	7.584	KO up vs OCT4	2.61625	21.9845	4.11257	8.46584	20.5273	15.7607	1	0	0	0	0	0		0	0	0	0	0	0	0
2668	ENSG00000102225	0.000430622	0.000303089	388.313	388.313	KO up vs OCT4	27.6615	5451.15	4.87541	14.9163	222.836	97.1042	1	0	0	0	0	0		0	0	0	0	0	0	0
2675	ENSG00000102265	0.0181594	0.0126259	329.334	329.334	KO up vs OCT4	4.32738	25063.9	2.89093	5.54326	222.689	261.124	1	0	0	0	0	0		0	0	0	0	0	0	0
2686	ENSG00000102359	0.00011827	3.49963e-05	6.86591	6.86591	KO up vs OCT4	3.48885	13.5118	6.14789	19.6268	19.2556	6.37706	1	0	0	0	0	0		0	0	0	0	0	0	0
2695	ENSG00000102409	0.00145697	0.000395441	9867300000	9867300000	KO up vs OCT4	267071	364561000000000	4.72705	11.2544	2664.76	1539.04	1	0	0	0	0	0		0	0	0	0	0	0	0
2713	ENSG00000102683	0.00085977	0.000225546	21.8841	21.8841	KO up vs OCT4	5.83356	82.0959	5.04215	12.7551	47.7275	24.3218	1	0	0	0	0	0		0	0	0	0	0	0	0
2715	ENSG00000102710	0.00124703	0.000449357	25.8996	25.8996	KO up vs OCT4	5.72233	117.223	4.65631	11.6845	57.0182	31.7188	1	0	0	0	0	0		0	0	0	0	0	0	0
2730	ENSG00000102837	0.000934984	0.000396675	3.90199	3.90199	KO up vs OCT4	2.0939	7.27135	4.72532	12.5083	10.3741	5.39097	1	0	0	0	0	0		0	0	0	0	0	0	0
2743	ENSG00000102898	0.0063975	0.00370332	1854600	1854600	KO up vs OCT4	269.673	12754500000	3.52887	7.64003	1276.84	1086.32	1	0	0	0	0	0		0	0	0	0	0	0	0
2745	ENSG00000102901	0.00544249	0.00334613	5.32162	5.32162	KO up vs OCT4	1.94148	14.5866	3.58184	7.99613	17.4027	14.1465	1	0	0	0	0	0		0	0	0	0	0	0	0
2764	ENSG00000103018	0.0396454	0.0127739	133.296	133.296	KO up vs OCT4	3.41676	5200.21	2.88485	4.18011	120.117	186.78	1	0	0	0	0	0		0	0	0	0	0	0	0
2802	ENSG00000103202	0.000592454	0.000370488	15767600	15767600	KO up vs OCT4	8574.99	28993200000	4.76326	13.8905	1680.06	786.178	1	0	0	0	0	0		0	0	0	0	0	0	0
2815	ENSG00000103266	0.00217696	0.000583355	18.0621	18.0621	KO up vs OCT4	4.52003	72.1761	4.51291	10.1907	41.8623	26.7013	1	0	0	0	0	0		0	0	0	0	0	0	0
2818	ENSG00000103275	0.00652277	0.0113318	9.25115	9.25115	KO up vs OCT4	1.81118	47.2532	2.94724	7.59791	43.2528	37.0028	1	0	0	0	0	0		0	0	0	0	0	0	0
2826	ENSG00000103343	0.00191195	0.00061571	10.4161	10.4161	KO up vs OCT4	3.36756	32.2176	4.48341	10.5274	28.7322	17.7403	1	0	0	0	0	0		0	0	0	0	0	0	0
2847	ENSG00000103494	0.000260764	7.20254e-05	6.50155	6.50155	KO up vs OCT4	3.20094	13.2056	5.70747	16.6345	17.879	6.98629	1	0	0	0	0	0		0	0	0	0	0	0	0
2849	ENSG00000103496	0.00276899	0.000754061	3.09592	3.09592	KO up vs OCT4	1.77148	5.41056	4.37316	9.58431	6.39414	4.33646	1	0	0	0	0	0		0	0	0	0	0	0	0
2854	ENSG00000103522	1.30651e-06	3.70856e-07	2.18122	2.18122	KO up vs OCT4	1.823	2.60982	9.39159	45.7549	3.15216	0.447801	1	0	0	0	0	0		0	0	0	0	0	0	0
2898	ENSG00000104129	0.00671727	0.00238696	11.7209	11.7209	KO up vs OCT4	2.84828	48.2322	3.75885	7.53432	32.276	27.8451	1	0	0	0	0	0		0	0	0	0	0	0	0
2899	ENSG00000104131	0.0049684	0.00153567	64339.9	64339.9	KO up vs OCT4	160.734	25754400	3.99178	8.20082	630.321	499.595	1	0	0	0	0	0		0	0	0	0	0	0	0
2900	ENSG00000104133	0.0179716	0.00589275	5.45461	5.45461	KO up vs OCT4	1.78869	16.6338	3.28705	5.56253	14.8026	17.2973	1	0	0	0	0	0		0	0	0	0	0	0	0
2909	ENSG00000104218	0.00139258	0.000367081	9.22895	9.22895	KO up vs OCT4	3.37195	25.2594	4.7684	11.3783	24.6913	14.1053	1	0	0	0	0	0		0	0	0	0	0	0	0
2941	ENSG00000104415	0.0113778	0.00367487	8.27127	8.27127	KO up vs OCT4	2.27235	30.107	3.5329	6.4414	23.0155	23.2249	1	0	0	0	0	0		0	0	0	0	0	0	0
2949	ENSG00000104472	0.00198611	0.000538363	47.1796	47.1796	KO up vs OCT4	7.59	293.269	4.55686	10.428	74.5202	46.4501	1	0	0	0	0	0		0	0	0	0	0	0	0
2966	ENSG00000104671	0.0288535	0.0091231	407.148	407.148	KO up vs OCT4	5.85123	28330.7	3.05998	4.71517	181.669	250.436	1	0	0	0	0	0		0	0	0	0	0	0	0
2967	ENSG00000104679	0.000222648	6.04764e-05	368.014	368.014	KO up vs OCT4	40.946	3307.63	5.81261	17.2038	177.571	67.0904	1	0	0	0	0	0		0	0	0	0	0	0	0
3038	ENSG00000104969	0.000210261	6.10347e-05	39165.6	39165.6	KO up vs OCT4	766.004	2002530	5.80706	17.4135	576.992	215.376	1	0	0	0	0	0		0	0	0	0	0	0	0
3043	ENSG00000104976	0.000114082	3.74256e-05	7.92348	7.92348	KO up vs OCT4	3.80962	16.4797	6.10623	19.7721	22.6969	7.46151	1	0	0	0	0	0		0	0	0	0	0	0	0
3051	ENSG00000105058	0.0376789	0.0133258	123050	123050	KO up vs OCT4	17.7392	853550000	2.8628	4.26404	714.018	1088.43	1	0	0	0	0	0		0	0	0	0	0	0	0
3053	ENSG00000105072	8.91158e-05	3.86988e-05	3.19482	3.19482	KO up vs OCT4	2.11528	4.82531	6.08552	20.7896	7.56662	2.36575	1	0	0	0	0	0		0	0	0	0	0	0	0
3065	ENSG00000105171	0.0163527	0.00566464	2.97157	2.97157	KO up vs OCT4	1.45898	6.05231	3.30757	5.73899	6.21636	7.04067	1	0	0	0	0	0		0	0	0	0	0	0	0
3068	ENSG00000105185	0.0137004	0.00411657	989.33	989.33	KO up vs OCT4	13.5667	72145.4	3.4737	6.07679	239.334	256.002	1	0	0	0	0	0		0	0	0	0	0	0	0
3078	ENSG00000105221	0.000109786	3.28184e-05	2.99075	2.99075	KO up vs OCT4	2.0402	4.38418	6.18791	19.9277	6.2403	2.03545	1	0	0	0	0	0		0	0	0	0	0	0	0
3103	ENSG00000105341	0.00664233	0.0071248	5.77138	5.77138	KO up vs OCT4	1.75979	18.9278	3.18841	7.55856	22.8245	19.628	1	0	0	0	0	0		0	0	0	0	0	0	0
3123	ENSG00000105401	0.000890167	0.000421159	3560230000	3560230000	KO up vs OCT4	142480	88961900000000	4.69213	12.6525	2777.14	1426.71	1	0	0	0	0	0		0	0	0	0	0	0	0
3158	ENSG00000105559	0.00280685	0.000840064	10.1573	10.1573	KO up vs OCT4	3.1819	32.4241	4.31471	9.55074	27.5436	18.7455	1	0	0	0	0	0		0	0	0	0	0	0	0
3169	ENSG00000105618	0.00320725	0.00101177	110597	110597	KO up vs OCT4	287.297	42575400	4.21455	9.2248	699.814	493.105	1	0	0	0	0	0		0	0	0	0	0	0	0
3200	ENSG00000105705	0.001946	0.00334013	6.95367	6.95367	KO up vs OCT4	2.15958	22.3902	3.58277	10.4812	30.6788	19.0257	1	0	0	0	0	0		0	0	0	0	0	0	0
3206	ENSG00000105723	0.00838443	0.00948235	7.78398	7.78398	KO up vs OCT4	1.81072	33.462	3.03991	7.06372	32.1578	29.5915	1	0	0	0	0	0		0	0	0	0	0	0	0
3214	ENSG00000105771	7.81824e-06	2.9846e-06	17.2748	17.2748	KO up vs OCT4	7.8395	38.0662	7.79094	33.1816	44.3373	8.68531	1	0	0	0	0	0		0	0	0	0	0	0	0
3229	ENSG00000105854	0.032612	0.0102059	7.01665	7.01665	KO up vs OCT4	1.72645	28.5172	3.00168	4.50587	18.9647	27.3577	1	0	0	0	0	0		0	0	0	0	0	0	0
3260	ENSG00000105996	0.000204499	9.82079e-05	5.78821	5.78821	KO up vs OCT4	2.91258	11.503	5.52318	17.5159	17.6851	6.56277	1	0	0	0	0	0		0	0	0	0	0	0	0
3282	ENSG00000106086	0.0106018	0.00369976	6.49701	6.49701	KO up vs OCT4	2.06653	20.426	3.52937	6.58282	18.489	18.2564	1	0	0	0	0	0		0	0	0	0	0	0	0
3291	ENSG00000106144	0.0136798	0.00728651	3.10878	3.10878	KO up vs OCT4	1.43748	6.72325	3.17675	6.0797	7.74299	8.27828	1	0	0	0	0	0		0	0	0	0	0	0	0
3312	ENSG00000106330	0.0154045	0.00665642	3.58407	3.58407	KO up vs OCT4	1.52358	8.43121	3.22373	5.85198	9.16678	10.1819	1	0	0	0	0	0		0	0	0	0	0	0	0
3317	ENSG00000106344	0.0017413	0.000465279	6.65878	6.65878	KO up vs OCT4	2.75286	16.1066	4.63709	10.7741	17.9939	10.8557	1	0	0	0	0	0		0	0	0	0	0	0	0
3329	ENSG00000106404	0.000488611	0.000124475	2.76052	2.76052	KO up vs OCT4	1.83673	4.14894	5.38416	14.5041	5.15391	2.30972	1	0	0	0	0	0		0	0	0	0	0	0	0
3350	ENSG00000106554	0.0229563	0.00971554	13455	13455	KO up vs OCT4	15.2185	11895800	3.02728	5.11669	504.163	640.465	1	0	0	0	0	0		0	0	0	0	0	0	0
3352	ENSG00000106565	0.00154031	0.000425842	3.44843	3.44843	KO up vs OCT4	1.94879	6.1021	4.68601	11.1031	7.74128	4.53192	1	0	0	0	0	0		0	0	0	0	0	0	0
3353	ENSG00000106571	0.00575228	0.00350643	7.35674	7.35674	KO up vs OCT4	2.18956	24.7181	3.55739	7.8732	24.7533	20.4359	1	0	0	0	0	0		0	0	0	0	0	0	0
3358	ENSG00000106608	0.00114751	0.000445889	2.16625	2.16625	KO up vs OCT4	1.51389	3.09972	4.66059	11.9187	3.27563	1.7864	1	0	0	0	0	0		0	0	0	0	0	0	0
3367	ENSG00000106635	0.00413211	0.00121229	15.3562	15.3562	KO up vs OCT4	3.66349	64.3684	4.1177	8.62363	37.9123	28.5761	1	0	0	0	0	0		0	0	0	0	0	0	0
3380	ENSG00000106723	0.00226904	0.000731679	44127.8	44127.8	KO up vs OCT4	228.421	8524880	4.3895	10.0847	598.096	385.498	1	0	0	0	0	0		0	0	0	0	0	0	0
3390	ENSG00000106809	0.000135968	0.000104461	556581	556581	KO up vs OCT4	3042.97	101803000	5.48682	19.0723	1107.75	377.531	1	0	0	0	0	0		0	0	0	0	0	0	0
3424	ENSG00000107223	0.00600797	0.00281861	109363000000000	109363000000000	KO up vs OCT4	600385	1.99209e+22	3.67161	7.77735	6022.87	5033.68	1	0	0	0	0	0		0	0	0	0	0	0	0
3436	ENSG00000107341	0.00209766	0.000640246	564.873	564.873	KO up vs OCT4	26.2765	12143.3	4.4621	10.2863	207.244	130.96	1	0	0	0	0	0		0	0	0	0	0	0	0
3453	ENSG00000107581	0.0133713	0.0073075	1.93989e+17	1.93989e+17	KO up vs OCT4	335425	1.12191e+29	3.17526	6.12392	9615.49	10206	1	0	0	0	0	0		0	0	0	0	0	0	0
3475	ENSG00000107796	1.97468e-05	9.49533e-06	2.26444e+20	2.26444e+20	KO up vs OCT4	115632000000000	4.43448e+26	6.98904	27.9099	12539.6	2920.39	1	0	0	0	0	0		0	0	0	0	0	0	0
3488	ENSG00000107863	0.00187045	0.000525336	136.06	136.06	KO up vs OCT4	13.339	1387.84	4.5703	10.585	122.208	75.0454	1	0	0	0	0	0		0	0	0	0	0	0	0
3492	ENSG00000107882	0.00206084	0.000684459	2.29542	2.29542	KO up vs OCT4	1.53007	3.4436	4.42574	10.3321	3.63848	2.289	1	0	0	0	0	0		0	0	0	0	0	0	0
3511	ENSG00000108039	0.0224505	0.011001	10.408	10.408	KO up vs OCT4	1.88583	57.4419	2.96266	5.15657	32.2087	40.6	1	0	0	0	0	0		0	0	0	0	0	0	0
3513	ENSG00000108061	0.00411267	0.00116882	17.6861	17.6861	KO up vs OCT4	3.94588	79.2717	4.13722	8.63461	41.593	31.3106	1	0	0	0	0	0		0	0	0	0	0	0	0
3519	ENSG00000108107	0.000166603	8.1988e-05	1.65675e+25	1.65675e+25	KO up vs OCT4	3485200000000000	7.87564e+34	5.63013	18.2852	19433.5	6908.18	1	0	0	0	0	0		0	0	0	0	0	0	0
3524	ENSG00000108219	0.00159269	0.000436538	2.51289	2.51289	KO up vs OCT4	1.64113	3.84774	4.6723	11.0128	4.27913	2.52565	1	0	0	0	0	0		0	0	0	0	0	0	0
3533	ENSG00000108270	0.00896259	0.0134406	63.7436	63.7436	KO up vs OCT4	2.75813	1473.19	2.85833	6.92529	146.19	137.213	1	0	0	0	0	0		0	0	0	0	0	0	0
3538	ENSG00000108296	0.00658533	0.00185178	7.44601	7.44601	KO up vs OCT4	2.44352	22.6898	3.89264	7.57722	20.1372	17.2744	1	0	0	0	0	0		0	0	0	0	0	0	0
3577	ENSG00000108518	0.00811363	0.0102316	3.50526e+50	3.50526e+50	KO up vs OCT4	141525000000000	8.68175e+86	3.00037	7.13241	107216	97709.4	1	0	0	0	0	0		0	0	0	0	0	0	0
3588	ENSG00000108587	0.00281037	0.000759978	2.36001	2.36001	KO up vs OCT4	1.54352	3.60839	4.36892	9.54764	3.68456	2.50843	1	0	0	0	0	0		0	0	0	0	0	0	0
3607	ENSG00000108691	0.0061299	0.00173416	62.0019	62.0019	KO up vs OCT4	6.40372	600.314	3.92735	7.73329	85.3218	71.7149	1	0	0	0	0	0		0	0	0	0	0	0	0
3615	ENSG00000108774	0.00154328	0.000557551	1389.19	1389.19	KO up vs OCT4	44.3102	43553.5	4.53767	11.0979	281.981	165.156	1	0	0	0	0	0		0	0	0	0	0	0	0
3619	ENSG00000108788	0.0220721	0.00850675	3.19953	3.19953	KO up vs OCT4	1.42127	7.20268	3.09632	5.1871	7.31111	9.16162	1	0	0	0	0	0		0	0	0	0	0	0	0
3625	ENSG00000108821	0.00416988	0.00116809	1.33867e+20	1.33867e+20	KO up vs OCT4	4147530000	4.32072e+30	4.13755	8.60248	10782.1	8146.9	1	0	0	0	0	0		0	0	0	0	0	0	0
3635	ENSG00000108848	0.00194693	0.000518411	1452770	1452770	KO up vs OCT4	1794.65	1176020000	4.57759	10.4799	1005.95	623.925	1	0	0	0	0	0		0	0	0	0	0	0	0
3638	ENSG00000108854	0.0131284	0.0047117	14.1522	14.1522	KO up vs OCT4	2.63215	76.0911	3.40337	6.15958	37.3053	39.3671	1	0	0	0	0	0		0	0	0	0	0	0	0
3670	ENSG00000109111	0.000103183	6.2298e-05	67.8436	67.8436	KO up vs OCT4	14.0828	326.836	5.79469	20.1811	106.789	34.3948	1	0	0	0	0	0		0	0	0	0	0	0	0
3689	ENSG00000109270	0.0200935	0.00861131	15.3264	15.3264	KO up vs OCT4	2.27319	103.335	3.08998	5.35719	41.7646	50.6739	1	0	0	0	0	0		0	0	0	0	0	0	0
3711	ENSG00000109536	0.00353372	0.00105274	1366540	1366540	KO up vs OCT4	943.046	1980200000	4.19324	8.99204	1019.76	737.144	1	0	0	0	0	0		0	0	0	0	0	0	0
3713	ENSG00000109576	0.00105546	0.000275294	16.4309	16.4309	KO up vs OCT4	4.81825	56.0318	4.92946	12.1572	39.1635	20.9393	1	0	0	0	0	0		0	0	0	0	0	0	0
3722	ENSG00000109674	0.0100589	0.00303984	13.4938	13.4938	KO up vs OCT4	2.87026	63.4377	3.63204	6.68903	34.3039	33.3345	1	0	0	0	0	0		0	0	0	0	0	0	0
3748	ENSG00000109881	0.00771506	0.00224829	107.578	107.578	KO up vs OCT4	7.47657	1547.89	3.79032	7.23846	110.165	98.9261	1	0	0	0	0	0		0	0	0	0	0	0	0
3753	ENSG00000109920	0.00225821	0.000618027	18087	18087	KO up vs OCT4	160.318	2040570	4.48136	10.0969	482.693	310.74	1	0	0	0	0	0		0	0	0	0	0	0	0
3762	ENSG00000110011	0.0164455	0.00492421	3.01079	3.01079	KO up vs OCT4	1.48855	6.08972	3.38041	5.72835	6.08418	6.90377	1	0	0	0	0	0		0	0	0	0	0	0	0
3800	ENSG00000110321	0.00231039	0.00102996	39534200000	39534200000	KO up vs OCT4	142110	1.09982e+16	4.20498	10.0387	3377.02	2186.61	1	0	0	0	0	0		0	0	0	0	0	0	0
3802	ENSG00000110328	0.00204978	0.000626175	2.53211	2.53211	KO up vs OCT4	1.61682	3.96556	4.47422	10.346	4.45667	2.79996	1	0	0	0	0	0		0	0	0	0	0	0	0
3806	ENSG00000110367	0.0193766	0.00611777	13152.7	13152.7	KO up vs OCT4	24.8722	6955340	3.26757	5.42365	456.509	547.105	1	0	0	0	0	0		0	0	0	0	0	0	0
3820	ENSG00000110492	0.000212205	0.000192196	1.30288e+22	1.30288e+22	KO up vs OCT4	6423800000000	2.64252e+31	5.13332	17.3796	17085.9	6390.12	1	0	0	0	0	0		0	0	0	0	0	0	0
3821	ENSG00000110497	0.00192368	0.000521852	3.16385	3.16385	KO up vs OCT4	1.83635	5.45103	4.57396	10.5114	6.65906	4.11782	1	0	0	0	0	0		0	0	0	0	0	0	0
3837	ENSG00000110713	0.00646856	0.00353963	397.3	397.3	KO up vs OCT4	10.4355	15126	3.55247	7.61602	215.944	184.3	1	0	0	0	0	0		0	0	0	0	0	0	0
3856	ENSG00000110880	0.00170687	0.000455356	176957	176957	KO up vs OCT4	644.467	48588800	4.64899	10.8272	730.782	438.717	1	0	0	0	0	0		0	0	0	0	0	0	0
3861	ENSG00000110906	0.000329223	8.97244e-05	11.0271	11.0271	KO up vs OCT4	4.35123	27.9455	5.57659	15.8195	29.2818	12.0315	1	0	0	0	0	0		0	0	0	0	0	0	0
3873	ENSG00000111011	0.00203468	0.000587671	12321.8	12321.8	KO up vs OCT4	135.108	1123740	4.50887	10.3652	451.91	283.393	1	0	0	0	0	0		0	0	0	0	0	0	0
3880	ENSG00000111077	1.34152e-05	3.85712e-06	4.68043	4.68043	KO up vs OCT4	3.01967	7.25457	7.60835	30.0186	12.341	2.67223	1	0	0	0	0	0		0	0	0	0	0	0	0
3885	ENSG00000111145	0.00246631	0.000821544	10.6919	10.6919	KO up vs OCT4	3.27525	34.9034	4.32676	9.87332	29.5827	19.4754	1	0	0	0	0	0		0	0	0	0	0	0	0
3892	ENSG00000111215	0.00535491	0.00223003	2.08019	2.08019	KO up vs OCT4	1.37088	3.15651	3.79462	8.03236	2.98996	2.41956	1	0	0	0	0	0		0	0	0	0	0	0	0
3897	ENSG00000111237	0.0411866	0.0131562	37.5225	37.5225	KO up vs OCT4	2.4493	574.832	2.86948	4.11763	65.6497	103.633	1	0	0	0	0	0		0	0	0	0	0	0	0
3910	ENSG00000111276	0.00256294	0.000696909	833.584	833.584	KO up vs OCT4	31.0428	22384	4.41594	9.7768	226.579	150.639	1	0	0	0	0	0		0	0	0	0	0	0	0
3921	ENSG00000111341	2.31225e-06	1.21832e-06	4827.91	4827.91	KO up vs OCT4	552.354	42198.9	8.45239	41.3614	416.14	65.3971	1	0	0	0	0	0		0	0	0	0	0	0	0
3932	ENSG00000111432	0.000309548	9.7956e-05	2.32797	2.32797	KO up vs OCT4	1.67292	3.23952	5.52469	16.0321	3.74693	1.51915	1	0	0	0	0	0		0	0	0	0	0	0	0
3934	ENSG00000111450	0.00482892	0.00153856	16.3087	16.3087	KO up vs OCT4	3.59822	73.9178	3.99078	8.26536	40.4085	31.7778	1	0	0	0	0	0		0	0	0	0	0	0	0
3942	ENSG00000111554	0.000750982	0.000197972	6.63463	6.63463	KO up vs OCT4	2.98407	14.7511	5.1164	13.1601	17.9847	8.88294	1	0	0	0	0	0		0	0	0	0	0	0	0
3944	ENSG00000111596	0.00193436	0.000518938	10.6211	10.6211	KO up vs OCT4	3.48189	32.3983	4.57703	10.4969	27.9481	17.3063	1	0	0	0	0	0		0	0	0	0	0	0	0
3951	ENSG00000111642	0.0154951	0.0111874	969.026	969.026	KO up vs OCT4	6.3424	148053	2.95391	5.84084	316.213	351.898	1	0	0	0	0	0		0	0	0	0	0	0	0
3954	ENSG00000111652	0.00348444	0.00119772	8.21129	8.21129	KO up vs OCT4	2.72529	24.7406	4.12416	9.02554	23.5021	16.9257	1	0	0	0	0	0		0	0	0	0	0	0	0
3965	ENSG00000111678	0.0155453	0.00459844	94731.1	94731.1	KO up vs OCT4	67.4935	132961000	3.41604	5.83471	655.907	730.696	1	0	0	0	0	0		0	0	0	0	0	0	0
3998	ENSG00000111832	0.00151584	0.000438298	105.715	105.715	KO up vs OCT4	12.2398	913.065	4.67007	11.1465	110.916	64.6797	1	0	0	0	0	0		0	0	0	0	0	0	0
4012	ENSG00000111885	0.0178019	0.00538396	2.80865	2.80865	KO up vs OCT4	1.4384	5.48423	3.33399	5.58015	5.34883	6.23055	1	0	0	0	0	0		0	0	0	0	0	0	0
4069	ENSG00000112276	0.0114945	0.00362426	2.29024	2.29024	KO up vs OCT4	1.38122	3.79751	3.54013	6.4211	3.51488	3.55807	1	0	0	0	0	0		0	0	0	0	0	0	0
4087	ENSG00000112335	0.00160429	0.000740514	195376000	195376000	KO up vs OCT4	16007.1	2384670000000	4.38299	10.9932	2083.56	1231.95	1	0	0	0	0	0		0	0	0	0	0	0	0
4114	ENSG00000112562	0.0127787	0.00456511	3.22573	3.22573	KO up vs OCT4	1.53928	6.75986	3.41982	6.21226	7.27887	7.61601	1	0	0	0	0	0		0	0	0	0	0	0	0
4118	ENSG00000112592	0.00542619	0.00262387	10.6389	10.6389	KO up vs OCT4	2.68404	42.1705	3.70915	8.00282	32.4916	26.3901	1	0	0	0	0	0		0	0	0	0	0	0	0
4122	ENSG00000112640	0.000728344	0.00025729	1465.62	1465.62	KO up vs OCT4	61.5377	34905.9	4.96759	13.2529	285.147	139.853	1	0	0	0	0	0		0	0	0	0	0	0	0
4124	ENSG00000112655	6.43442e-05	1.9306e-05	808806	808806	KO up vs OCT4	8942.4	73153300	6.52381	22.1918	963.984	282.352	1	0	0	0	0	0		0	0	0	0	0	0	0
4135	ENSG00000112715	0.0008277	0.000244249	22.4702	22.4702	KO up vs OCT4	5.85143	86.2884	4.99699	12.8681	49.8677	25.1894	1	0	0	0	0	0		0	0	0	0	0	0	0
4136	ENSG00000112739	0.0221591	0.0125663	709.426	709.426	KO up vs OCT4	5.27543	95401.7	2.89339	5.18003	266.383	334.262	1	0	0	0	0	0		0	0	0	0	0	0	0
4149	ENSG00000112837	0.00114153	0.000300686	16.7145	16.7145	KO up vs OCT4	4.80416	58.1524	4.87987	11.9335	39.7091	21.629	1	0	0	0	0	0		0	0	0	0	0	0	0
4169	ENSG00000113068	0.00983859	0.00310355	37721.3	37721.3	KO up vs OCT4	70.1837	20273900	3.62119	6.73406	569.744	549.941	1	0	0	0	0	0		0	0	0	0	0	0	0
4178	ENSG00000113141	0.00202532	0.00069938	231125000	231125000	KO up vs OCT4	18633.6	2866800000000	4.41402	10.3771	1973.53	1236.17	1	0	0	0	0	0		0	0	0	0	0	0	0
4181	ENSG00000113194	0.00152619	0.000451653	68.5357	68.5357	KO up vs OCT4	9.62939	487.792	4.65349	11.1281	91.7463	53.5899	1	0	0	0	0	0		0	0	0	0	0	0	0
4209	ENSG00000113368	0.00676559	0.00252857	1935400000000	1935400000000	KO up vs OCT4	147129	2.54591e+19	3.72857	7.51885	4324.78	3738.75	1	0	0	0	0	0		0	0	0	0	0	0	0
4212	ENSG00000113387	0.0109146	0.0113502	6646.9	6646.9	KO up vs OCT4	10.466	4221410	2.94639	6.52441	581.706	579.529	1	0	0	0	0	0		0	0	0	0	0	0	0
4235	ENSG00000113580	7.7473e-05	0.00159066	4.9814	4.9814	KO up vs OCT4	2.0805	11.9271	3.97311	21.3838	34.8938	10.6066	1	0	0	0	0	0		0	0	0	0	0	0	0
4236	ENSG00000113583	0.00601495	0.00221403	1394.98	1394.98	KO up vs OCT4	22.7025	85715.8	3.7984	7.7748	282.247	235.969	1	0	0	0	0	0		0	0	0	0	0	0	0
4242	ENSG00000113615	0.00387162	0.00715035	6.13767	6.13767	KO up vs OCT4	1.79376	21.0011	3.18655	8.7759	28.4268	21.0547	1	0	0	0	0	0		0	0	0	0	0	0	0
4243	ENSG00000113621	0.0222793	0.00781458	6.52551	6.52551	KO up vs OCT4	1.79564	23.7142	3.14041	5.17031	18.4277	23.1668	1	0	0	0	0	0		0	0	0	0	0	0	0
4248	ENSG00000113649	0.018887	0.00782116	805.305	805.305	KO up vs OCT4	8.06488	80412.4	3.13997	5.47069	248.194	294.892	1	0	0	0	0	0		0	0	0	0	0	0	0
4254	ENSG00000113721	0.019973	0.00712706	14.4071	14.4071	KO up vs OCT4	2.36331	87.828	3.18825	5.36817	37.5486	45.4654	1	0	0	0	0	0		0	0	0	0	0	0	0
4266	ENSG00000113810	0.026803	0.00830587	18651900	18651900	KO up vs OCT4	165.215	2105700000000	3.10874	4.84309	1403.24	1883.31	1	0	0	0	0	0		0	0	0	0	0	0	0
4269	ENSG00000113838	0.00389416	0.00107799	3.88326	3.88326	KO up vs OCT4	1.92627	7.82842	4.18053	8.76226	9.21923	6.83898	1	0	0	0	0	0		0	0	0	0	0	0	0
4274	ENSG00000113916	0.00216636	0.000983881	2.13809	2.13809	KO up vs OCT4	1.45029	3.15208	4.22956	10.2033	3.29054	2.09624	1	0	0	0	0	0		0	0	0	0	0	0	0
4283	ENSG00000114026	1.26141e-05	3.37411e-06	4.04517	4.04517	KO up vs OCT4	2.73352	5.98621	7.70324	30.3661	9.98506	2.13734	1	0	0	0	0	0		0	0	0	0	0	0	0
4284	ENSG00000114030	0.00141866	0.000373396	12.9493	12.9493	KO up vs OCT4	4.04881	41.4155	4.75891	11.3273	32.7743	18.807	1	0	0	0	0	0		0	0	0	0	0	0	0
4307	ENSG00000114316	0.0333559	0.0105109	2.95978	2.95978	KO up vs OCT4	1.35004	6.48895	2.98637	4.46775	5.89312	8.57374	1	0	0	0	0	0		0	0	0	0	0	0	0
4323	ENSG00000114446	0.00224305	0.000609287	17.2969	17.2969	KO up vs OCT4	4.38737	68.1919	4.48914	10.1141	40.7419	26.1835	1	0	0	0	0	0		0	0	0	0	0	0	0
4326	ENSG00000114473	0.000319925	8.77847e-05	2.04821	2.04821	KO up vs OCT4	1.55249	2.70223	5.58954	15.9181	2.61655	1.06844	1	0	0	0	0	0		0	0	0	0	0	0	0
4355	ENSG00000114745	0.0116171	0.00337867	2.0204	2.0204	KO up vs OCT4	1.32116	3.08974	3.57678	6.40003	2.47209	2.5107	1	0	0	0	0	0		0	0	0	0	0	0	0
4385	ENSG00000114993	0.0206691	0.00714808	7.72124	7.72124	KO up vs OCT4	1.93151	30.8657	3.18672	5.30578	21.8074	26.7158	1	0	0	0	0	0		0	0	0	0	0	0	0
4412	ENSG00000115204	0.000763602	0.00023588	9.92677	9.92677	KO up vs OCT4	3.69445	26.6726	5.01674	13.1098	27.4156	13.593	1	0	0	0	0	0		0	0	0	0	0	0	0
4440	ENSG00000115307	0.000408195	0.000139096	15069.2	15069.2	KO up vs OCT4	302.894	749705	5.31955	15.0933	493.186	212.393	1	0	0	0	0	0		0	0	0	0	0	0	0
4485	ENSG00000115556	0.000244525	6.99517e-05	9.2345	9.2345	KO up vs OCT4	3.99123	21.3658	5.72498	16.8645	25.4023	9.79069	1	0	0	0	0	0		0	0	0	0	0	0	0
4491	ENSG00000115594	0.000151357	3.75707e-05	2.11352	2.11352	KO up vs OCT4	1.62172	2.75448	6.10383	18.6539	2.80138	0.976148	1	0	0	0	0	0		0	0	0	0	0	0	0
4518	ENSG00000115806	0.000518678	0.000205134	1825.88	1825.88	KO up vs OCT4	75.658	44064.5	5.09612	14.312	310.506	141.021	1	0	0	0	0	0		0	0	0	0	0	0	0
4547	ENSG00000115993	0.000581815	0.000230264	15.8293	15.8293	KO up vs OCT4	4.83434	51.8305	5.0304	13.9474	42.0033	19.5751	1	0	0	0	0	0		0	0	0	0	0	0	0
4583	ENSG00000116205	0.0112493	0.00488061	2.29864	2.29864	KO up vs OCT4	1.35138	3.90991	3.38504	6.46403	3.90433	3.92605	1	0	0	0	0	0		0	0	0	0	0	0	0
4590	ENSG00000116251	0.0142841	0.0053327	9.5552e+18	9.5552e+18	KO up vs OCT4	5008230	1.82304e+31	3.33896	5.99632	10263.3	11125.4	1	0	0	0	0	0		0	0	0	0	0	0	0
4600	ENSG00000116350	0.00293847	0.00349575	1142.27	1142.27	KO up vs OCT4	15.9091	82014.1	3.55898	9.43798	369.026	254.151	1	0	0	0	0	0		0	0	0	0	0	0	0
4617	ENSG00000116580	0.000473121	0.000169992	8.98385	8.98385	KO up vs OCT4	3.61096	22.3512	5.2037	14.6084	25.9781	11.5589	1	0	0	0	0	0		0	0	0	0	0	0	0
4632	ENSG00000116685	0.000105186	5.61348e-05	13.9378	13.9378	KO up vs OCT4	5.27481	36.8284	5.85771	20.1023	40.6268	13.1365	1	0	0	0	0	0		0	0	0	0	0	0	0
4655	ENSG00000116774	0.00385262	0.00416438	38375900000	38375900000	KO up vs OCT4	9776.39	1.5064e+17	3.46768	8.78746	4336.22	3207.46	1	0	0	0	0	0		0	0	0	0	0	0	0
4674	ENSG00000116885	0.00745345	0.00224606	2.49173	2.49173	KO up vs OCT4	1.48095	4.19242	3.79085	7.31157	4.23692	3.76663	1	0	0	0	0	0		0	0	0	0	0	0	0
4705	ENSG00000117122	5.52475e-06	5.55294e-06	1488840000000000	1488840000000000	KO up vs OCT4	51930700000	4.26845e+19	7.35379	35.359	7973.21	1465.71	1	0	0	0	0	0		0	0	0	0	0	0	0
4741	ENSG00000117408	4.5871e-05	1.81694e-05	6.58698	6.58698	KO up vs OCT4	3.54152	12.2513	6.56286	23.7252	19.556	5.35777	1	0	0	0	0	0		0	0	0	0	0	0	0
4763	ENSG00000117533	0.0213468	0.0094479	2.1248	2.1248	KO up vs OCT4	1.24408	3.629	3.0418	5.24733	3.21838	3.98669	1	0	0	0	0	0		0	0	0	0	0	0	0
4772	ENSG00000117597	0.00187715	0.000552901	2.92371	2.92371	KO up vs OCT4	1.75521	4.87012	4.54226	10.5756	5.89429	3.62277	1	0	0	0	0	0		0	0	0	0	0	0	0
4777	ENSG00000117614	0.00790175	0.00233746	411.367	411.367	KO up vs OCT4	13.0651	12952.3	3.76986	7.18802	183.091	165.566	1	0	0	0	0	0		0	0	0	0	0	0	0
4783	ENSG00000117643	0.00081673	0.000211723	2.38419	2.38419	KO up vs OCT4	1.64744	3.45042	5.07811	12.9079	3.77521	1.90108	1	0	0	0	0	0		0	0	0	0	0	0	0
4818	ENSG00000118181	0.00444138	0.00128626	1.60447e+142	1.60447e+142	KO up vs OCT4	1.04569e+67	2.46183e+217	4.08608	8.45663	542546	417016	1	0	0	0	0	0		0	0	0	0	0	0	0
4849	ENSG00000118482	0.0196633	0.00825184	499.099	499.099	KO up vs OCT4	6.68601	37256.9	3.11213	5.39673	214.873	258.8	1	0	0	0	0	0		0	0	0	0	0	0	0
4950	ENSG00000119523	0.00194901	0.0109264	3.34742	3.34742	KO up vs OCT4	1.38851	8.06998	2.96619	10.4772	17.3662	10.7739	1	0	0	0	0	0		0	0	0	0	0	0	0
4964	ENSG00000119636	8.36108e-06	1.96695e-06	2.87689	2.87689	KO up vs OCT4	2.16987	3.81428	8.09411	32.7739	5.58072	1.10682	1	0	0	0	0	0		0	0	0	0	0	0	0
4976	ENSG00000119685	0.00142102	0.000606024	8.17844	8.17844	KO up vs OCT4	2.97674	22.4699	4.49207	11.3227	24.7576	14.2125	1	0	0	0	0	0		0	0	0	0	0	0	0
4993	ENSG00000119737	0.00723658	0.00206288	3.09939	3.09939	KO up vs OCT4	1.63898	5.8611	3.83566	7.37445	6.40801	5.64815	1	0	0	0	0	0		0	0	0	0	0	0	0
4997	ENSG00000119777	3.68473e-05	6.56237e-05	6.54431	6.54431	KO up vs OCT4	3.23624	13.2339	5.76335	24.7611	26.2831	6.89954	1	0	0	0	0	0		0	0	0	0	0	0	0
5019	ENSG00000119927	0.0211236	0.00913659	3.18999	3.18999	KO up vs OCT4	1.40611	7.23697	3.05921	5.26634	7.56499	9.33712	1	0	0	0	0	0		0	0	0	0	0	0	0
5042	ENSG00000120071	0.0165903	0.0054305	4.31746	4.31746	KO up vs OCT4	1.67131	11.1532	3.32951	5.71187	11.0128	12.5324	1	0	0	0	0	0		0	0	0	0	0	0	0
5045	ENSG00000120093	0.00100314	0.000345576	8.01712	8.01712	KO up vs OCT4	3.14278	20.4514	4.80204	12.3037	23.0972	12.2022	1	0	0	0	0	0		0	0	0	0	0	0	0
5072	ENSG00000120314	0.0304483	0.0113653	2.70463	2.70463	KO up vs OCT4	1.30377	5.61068	2.9457	4.62273	5.26899	7.4087	1	0	0	0	0	0		0	0	0	0	0	0	0
5080	ENSG00000120333	0.0139628	0.00779654	23.4646	23.4646	KO up vs OCT4	2.67936	205.493	3.14161	6.04013	60.8789	65.5139	1	0	0	0	0	0		0	0	0	0	0	0	0
5084	ENSG00000120370	0.00128485	0.000340987	5.08562	5.08562	KO up vs OCT4	2.44942	10.5591	4.8095	11.6011	13.2542	7.42623	1	0	0	0	0	0		0	0	0	0	0	0	0
5091	ENSG00000120458	0.00230541	0.00135439	4.9873	4.9873	KO up vs OCT4	2.12028	11.7311	4.05857	10.0441	15.7301	10.1796	1	0	0	0	0	0		0	0	0	0	0	0	0
5095	ENSG00000120509	0.000509007	0.000142059	15510.8	15510.8	KO up vs OCT4	305.366	787856	5.30733	14.3723	474.631	214.656	1	0	0	0	0	0		0	0	0	0	0	0	0
5114	ENSG00000120675	0.0106578	0.00408063	778.521	778.521	KO up vs OCT4	12.4592	48646.5	3.47827	6.57221	240.538	237.895	1	0	0	0	0	0		0	0	0	0	0	0	0
5117	ENSG00000120688	0.0107128	0.00315847	8.82446	8.82446	KO up vs OCT4	2.3992	32.4572	3.61201	6.56187	23.8258	23.6011	1	0	0	0	0	0		0	0	0	0	0	0	0
5143	ENSG00000120860	0.00327106	0.000894583	22.4623	22.4623	KO up vs OCT4	4.67111	108.016	4.28078	9.17721	48.4495	34.3156	1	0	0	0	0	0		0	0	0	0	0	0	0
5145	ENSG00000120875	0.00193174	0.000954558	3.45009	3.45009	KO up vs OCT4	1.83726	6.47872	4.24584	10.5004	8.92467	5.52458	1	0	0	0	0	0		0	0	0	0	0	0	0
5168	ENSG00000121058	0.00496254	0.00137947	1520.4	1520.4	KO up vs OCT4	30.4875	75821.5	4.0488	8.20349	268.383	212.652	1	0	0	0	0	0		0	0	0	0	0	0	0
5177	ENSG00000121104	0.0118383	0.00452738	5.43288	5.43288	KO up vs OCT4	1.8676	15.8043	3.42415	6.36264	15.5298	15.865	1	0	0	0	0	0		0	0	0	0	0	0	0
5235	ENSG00000121775	0.000101458	3.09413e-05	8.88512	8.88512	KO up vs OCT4	4.16311	18.9631	6.22472	20.2504	24.9139	7.99688	1	0	0	0	0	0		0	0	0	0	0	0	0
5253	ENSG00000121931	0.00318048	0.00277921	6.75248	6.75248	KO up vs OCT4	2.19982	20.7271	3.67899	9.24509	24.8926	17.5014	1	0	0	0	0	0		0	0	0	0	0	0	0
5265	ENSG00000122033	0.00754042	0.00280423	2126.12	2126.12	KO up vs OCT4	23.5001	192356	3.67429	7.28694	316.577	282.388	1	0	0	0	0	0		0	0	0	0	0	0	0
5271	ENSG00000122085	0.0114541	0.00332487	4.37465	4.37465	KO up vs OCT4	1.79771	10.6455	3.58517	6.4281	10.8824	11.0041	1	0	0	0	0	0		0	0	0	0	0	0	0
5272	ENSG00000122121	0.000354022	0.000110425	6.43307	6.43307	KO up vs OCT4	3.07759	13.447	5.45421	15.5715	18.1201	7.56386	1	0	0	0	0	0		0	0	0	0	0	0	0
5284	ENSG00000122218	0.00231586	0.000626485	640.039	640.039	KO up vs OCT4	28.2587	14496.4	4.47395	10.0326	209.071	135.454	1	0	0	0	0	0		0	0	0	0	0	0	0
5288	ENSG00000122257	0.0198333	0.00613194	34.6668	34.6668	KO up vs OCT4	3.32215	361.75	3.26637	5.38099	63.3498	76.5238	1	0	0	0	0	0		0	0	0	0	0	0	0
5352	ENSG00000122786	0.0026603	0.00158982	95223.2	95223.2	KO up vs OCT4	186.963	48498700	3.97339	9.6837	805.341	540.57	1	0	0	0	0	0		0	0	0	0	0	0	0
5383	ENSG00000123106	0.0200326	0.0071408	2.29815	2.29815	KO up vs OCT4	1.30747	4.0395	3.18724	5.36273	3.65176	4.42619	1	0	0	0	0	0		0	0	0	0	0	0	0
5390	ENSG00000123144	0.000167384	5.66968e-05	5.41327e+21	5.41327e+21	KO up vs OCT4	51253100000000	5.71742e+29	5.85167	18.2674	13347.4	4749.34	1	0	0	0	0	0		0	0	0	0	0	0	0
5393	ENSG00000123159	0.00280081	0.00798106	3.07137	3.07137	KO up vs OCT4	1.4155	6.66429	3.12946	9.55606	12.2747	8.34923	1	0	0	0	0	0		0	0	0	0	0	0	0
5399	ENSG00000123200	0.00361402	0.00122709	21434.3	21434.3	KO up vs OCT4	113.551	4046000	4.11122	8.93857	525.469	382.113	1	0	0	0	0	0		0	0	0	0	0	0	0
5404	ENSG00000123243	4.14262e-06	2.36734e-06	2.01236	2.01236	KO up vs OCT4	1.66442	2.43304	7.95842	37.2547	2.87381	0.501406	1	0	0	0	0	0		0	0	0	0	0	0	0
5451	ENSG00000123607	0.0284506	0.00885847	3.49046	3.49046	KO up vs OCT4	1.45047	8.39954	3.07527	4.73946	7.82338	10.7295	1	0	0	0	0	0		0	0	0	0	0	0	0
5455	ENSG00000123636	0.0232274	0.0122393	11.0925	11.0925	KO up vs OCT4	1.85541	66.3166	2.90713	5.09572	34.8784	44.4902	1	0	0	0	0	0		0	0	0	0	0	0	0
5459	ENSG00000123689	4.5892e-05	1.66994e-05	5.05076	5.05076	KO up vs OCT4	2.97668	8.57	6.61738	23.7231	14.1962	3.88969	1	0	0	0	0	0		0	0	0	0	0	0	0
5503	ENSG00000124155	0.000741825	0.00033625	2971070	2971070	KO up vs OCT4	3715.96	2375490000	4.81731	13.1972	1262.11	621.621	1	0	0	0	0	0		0	0	0	0	0	0	0
5506	ENSG00000124160	0.000687869	0.000180856	8877.99	8877.99	KO up vs OCT4	198.542	396988	5.16814	13.4274	415.116	200.951	1	0	0	0	0	0		0	0	0	0	0	0	0
5507	ENSG00000124164	0.0281333	0.00886242	5.17877	5.17877	KO up vs OCT4	1.63097	16.4439	3.07504	4.75887	13.5986	18.574	1	0	0	0	0	0		0	0	0	0	0	0	0
5517	ENSG00000124201	0.00392395	0.00108218	2.30553	2.30553	KO up vs OCT4	1.49696	3.55086	4.17845	8.74438	3.49129	2.5952	1	0	0	0	0	0		0	0	0	0	0	0	0
5552	ENSG00000124356	0.0184623	0.0116141	4.64038	4.64038	KO up vs OCT4	1.49909	14.3641	2.93443	5.51265	15.0662	17.7647	1	0	0	0	0	0		0	0	0	0	0	0	0
5556	ENSG00000124380	0.00119606	0.000384007	520.492	520.492	KO up vs OCT4	30.145	8986.97	4.74334	11.8016	205.016	112.917	1	0	0	0	0	0		0	0	0	0	0	0	0
5557	ENSG00000124383	0.0122798	0.00429996	771.983	771.983	KO up vs OCT4	12.0205	49578.4	3.45099	6.29039	233.286	241.06	1	0	0	0	0	0		0	0	0	0	0	0	0
5561	ENSG00000124422	0.0118275	0.00370565	234.079	234.079	KO up vs OCT4	8.29292	6607.18	3.52854	6.36445	152.004	155.241	1	0	0	0	0	0		0	0	0	0	0	0	0
5563	ENSG00000124440	0.00194656	0.000519248	7.30166	7.30166	KO up vs OCT4	2.85664	18.6633	4.5767	10.4805	19.758	12.2539	1	0	0	0	0	0		0	0	0	0	0	0	0
5588	ENSG00000124570	0.0215911	0.0124488	5.44979	5.44979	KO up vs OCT4	1.53988	19.2874	2.89829	5.22678	17.8721	22.2257	1	0	0	0	0	0		0	0	0	0	0	0	0
5626	ENSG00000124784	0.0163298	0.00495799	114.93	114.93	KO up vs OCT4	5.52403	2391.16	3.37686	5.74164	113.227	128.182	1	0	0	0	0	0		0	0	0	0	0	0	0
5658	ENSG00000125149	0.0011823	0.000325584	2.83495	2.83495	KO up vs OCT4	1.77973	4.51584	4.83532	11.8342	5.49082	3.01585	1	0	0	0	0	0		0	0	0	0	0	0	0
5675	ENSG00000125352	0.00174745	0.00046455	107.37	107.37	KO up vs OCT4	12.1589	948.132	4.63796	10.7647	109.33	66.0162	1	0	0	0	0	0		0	0	0	0	0	0	0
5677	ENSG00000125355	1.57446e-06	7.26772e-07	13.7393	13.7393	KO up vs OCT4	7.24801	26.0441	8.85136	44.2764	38.7642	5.69078	1	0	0	0	0	0		0	0	0	0	0	0	0
5682	ENSG00000125384	0.000159137	4.20983e-05	2.44473	2.44473	KO up vs OCT4	1.77509	3.36698	6.03356	18.4607	4.04857	1.4255	1	0	0	0	0	0		0	0	0	0	0	0	0
5684	ENSG00000125386	0.00773093	0.00228082	19.8385	19.8385	KO up vs OCT4	3.60156	109.277	3.78277	7.23412	45.0827	40.5077	1	0	0	0	0	0		0	0	0	0	0	0	0
5686	ENSG00000125398	0.000517888	0.000183965	4.12995	4.12995	KO up vs OCT4	2.28025	7.48011	5.15837	14.3169	10.8126	4.90901	1	0	0	0	0	0		0	0	0	0	0	0	0
5718	ENSG00000125611	0.00344264	0.00210438	2.75753	2.75753	KO up vs OCT4	1.55498	4.89008	3.82516	9.05439	6.36082	4.56633	1	0	0	0	0	0		0	0	0	0	0	0	0
5725	ENSG00000125648	0.0195349	0.00595036	19.0412	19.0412	KO up vs OCT4	2.73739	132.45	3.28199	5.40873	43.5566	52.3446	1	0	0	0	0	0		0	0	0	0	0	0	0
5729	ENSG00000125656	0.000791259	0.000407275	43.9627	43.9627	KO up vs OCT4	7.75446	249.24	4.7107	13.0027	83.7924	41.8874	1	0	0	0	0	0		0	0	0	0	0	0	0
5732	ENSG00000125676	0.00359102	0.00098014	48.5001	48.5001	KO up vs OCT4	6.68527	351.857	4.23161	8.95374	75.2657	54.6394	1	0	0	0	0	0		0	0	0	0	0	0	0
5744	ENSG00000125741	0.00113283	0.00201346	2.25595	2.25595	KO up vs OCT4	1.42884	3.56184	3.84844	11.9552	5.33785	2.90217	1	0	0	0	0	0		0	0	0	0	0	0	0
5765	ENSG00000125818	0.000844276	0.000235681	238.179	238.179	KO up vs OCT4	22.5647	2514.06	5.01721	12.8091	152.278	77.2739	1	0	0	0	0	0		0	0	0	0	0	0	0
5805	ENSG00000125944	0.00378629	0.00103752	47664400000	47664400000	KO up vs OCT4	153813	1.47705e+16	4.20106	8.82836	3021.21	2224.4	1	0	0	0	0	0		0	0	0	0	0	0	0
5815	ENSG00000125971	0.00869816	0.0055934	4857.84	4857.84	KO up vs OCT4	19.2039	1228850	3.31415	6.98728	457.933	425.997	1	0	0	0	0	0		0	0	0	0	0	0	0
5823	ENSG00000126001	0.000876798	0.000296252	60.3093	60.3093	KO up vs OCT4	9.85223	369.176	4.88821	12.6971	89.2186	45.6733	1	0	0	0	0	0		0	0	0	0	0	0	0
5846	ENSG00000126247	0.000111139	3.38637e-05	1679470000	1679470000	KO up vs OCT4	986743	2858510000000	6.16836	19.878	2355.07	770.096	1	0	0	0	0	0		0	0	0	0	0	0	0
5849	ENSG00000126254	0.00572666	0.00213895	51.8657	51.8657	KO up vs OCT4	5.54847	484.827	3.81657	7.88307	84.3019	69.5113	1	0	0	0	0	0		0	0	0	0	0	0	0
5883	ENSG00000126653	0.0179538	0.00577028	63.2857	63.2857	KO up vs OCT4	4.18158	957.793	3.29796	5.56437	87.9266	102.711	1	0	0	0	0	0		0	0	0	0	0	0	0
5891	ENSG00000126756	0.0217555	0.00685728	34310.8	34310.8	KO up vs OCT4	30.2973	38856000	3.20829	5.21311	551.834	688.058	1	0	0	0	0	0		0	0	0	0	0	0	0
5899	ENSG00000126785	0.000348817	0.000177721	61.4422	61.4422	KO up vs OCT4	11.0231	342.474	5.17817	15.6218	98.7106	41.0719	1	0	0	0	0	0		0	0	0	0	0	0	0
5906	ENSG00000126822	0.00996656	0.0036139	3.43214	3.43214	KO up vs OCT4	1.61761	7.28209	3.54163	6.70777	8.1249	7.87324	1	0	0	0	0	0		0	0	0	0	0	0	0
5915	ENSG00000126883	0.00498493	0.00211083	6.34997	6.34997	KO up vs OCT4	2.23456	18.0448	3.82355	8.19331	19.1308	15.177	1	0	0	0	0	0		0	0	0	0	0	0	0
5944	ENSG00000127314	0.00118965	0.000519488	3998.87	3998.87	KO up vs OCT4	79.7257	200574	4.57645	11.8168	387.735	213.28	1	0	0	0	0	0		0	0	0	0	0	0	0
5962	ENSG00000127445	0.00100358	0.00027093	26.1924	26.1924	KO up vs OCT4	6.27744	109.287	4.93846	12.3024	53.7389	28.3931	1	0	0	0	0	0		0	0	0	0	0	0	0
5972	ENSG00000127527	4.16873e-05	1.02429e-05	2.5693	2.5693	KO up vs OCT4	1.9152	3.4468	6.93844	24.1732	4.46691	1.20112	1	0	0	0	0	0		0	0	0	0	0	0	0
5996	ENSG00000127824	0.0110393	0.00350002	30.9516	30.9516	KO up vs OCT4	3.85167	248.724	3.55835	6.50168	60.4396	60.424	1	0	0	0	0	0		0	0	0	0	0	0	0
6005	ENSG00000127920	0.00167593	0.000446167	17.6323	17.6323	KO up vs OCT4	4.66178	66.6909	4.66024	10.876	41.2029	24.6247	1	0	0	0	0	0		0	0	0	0	0	0	0
6018	ENSG00000127990	0.00813509	0.0026476	44.6968	44.6968	KO up vs OCT4	4.87371	409.915	3.70443	7.12687	74.9189	68.3291	1	0	0	0	0	0		0	0	0	0	0	0	0
6043	ENSG00000128266	2.94218e-06	1.33952e-06	12.9087	12.9087	KO up vs OCT4	6.67601	24.9603	8.38058	39.6198	36.8742	6.04956	1	0	0	0	0	0		0	0	0	0	0	0	0
6065	ENSG00000128408	3.28141e-05	8.14689e-06	2.11611	2.11611	KO up vs OCT4	1.68412	2.65892	7.09199	25.3237	2.82629	0.725444	1	0	0	0	0	0		0	0	0	0	0	0	0
6075	ENSG00000128524	0.00146723	0.000838187	2193320000	2193320000	KO up vs OCT4	46274.4	103959000000000	4.31592	11.2352	2787.74	1612.81	1	0	0	0	0	0		0	0	0	0	0	0	0
6078	ENSG00000128563	0.0152765	0.00493469	7.94864	7.94864	KO up vs OCT4	2.11223	29.9119	3.37931	5.86785	22.0604	24.437	1	0	0	0	0	0		0	0	0	0	0	0	0
6088	ENSG00000128595	0.000312272	0.000226356	1647980000000	1647980000000	KO up vs OCT4	9557380	2.8416e+17	5.04011	16.0017	4980.05	2022.93	1	0	0	0	0	0		0	0	0	0	0	0	0
6116	ENSG00000128791	0.0017464	0.000462566	3914.42	3914.42	KO up vs OCT4	83.1856	184199	4.64032	10.7663	341.842	206.383	1	0	0	0	0	0		0	0	0	0	0	0	0
6123	ENSG00000128872	3.48417e-05	3.04119e-05	3.02517	3.02517	KO up vs OCT4	2.06152	4.43927	6.23552	25.0315	7.88135	2.04658	1	0	0	0	0	0		0	0	0	0	0	0	0
6141	ENSG00000129028	0.0350811	0.0135177	3.13017	3.13017	KO up vs OCT4	1.32014	7.42194	2.85534	4.38299	6.9933	10.3711	1	0	0	0	0	0		0	0	0	0	0	0	0
6195	ENSG00000129480	0.0211991	0.00698722	7.31741	7.31741	KO up vs OCT4	1.90788	28.065	3.19854	5.25988	20.3461	25.1431	1	0	0	0	0	0		0	0	0	0	0	0	0
6236	ENSG00000129933	8.50152e-05	2.1027e-05	2.72885	2.72885	KO up vs OCT4	1.95156	3.81571	6.46908	20.9881	5.04941	1.5638	1	0	0	0	0	0		0	0	0	0	0	0	0
6283	ENSG00000130254	0.00047421	0.00020132	222.299	222.299	KO up vs OCT4	22.5995	2186.63	5.10683	14.601	163.344	72.717	1	0	0	0	0	0		0	0	0	0	0	0	0
6296	ENSG00000130311	0.000140734	4.47864e-05	14.2286	14.2286	KO up vs OCT4	5.46566	37.0411	5.99551	18.9371	37.1077	12.7369	1	0	0	0	0	0		0	0	0	0	0	0	0
6304	ENSG00000130349	0.00195225	0.000546846	16.8091	16.8091	KO up vs OCT4	4.39976	64.2181	4.54829	10.4728	40.276	24.9975	1	0	0	0	0	0		0	0	0	0	0	0	0
6308	ENSG00000130382	0.000620787	0.000197049	90.3765	90.3765	KO up vs OCT4	13.5068	604.724	5.11907	13.7445	106.299	50.2708	1	0	0	0	0	0		0	0	0	0	0	0	0
6397	ENSG00000130811	0.000504648	0.000195169	45081	45081	KO up vs OCT4	492.034	4130400	5.12454	14.4	629.108	283.973	1	0	0	0	0	0		0	0	0	0	0	0	0
6409	ENSG00000130856	0.011788	0.00400504	3.40202	3.40202	KO up vs OCT4	1.59366	7.26237	3.48802	6.37107	7.84279	8.0015	1	0	0	0	0	0		0	0	0	0	0	0	0
6428	ENSG00000131013	0.0231667	0.00705035	3128.24	3128.24	KO up vs OCT4	13.5219	723703	3.19387	5.10039	323.564	412.354	1	0	0	0	0	0		0	0	0	0	0	0	0
6430	ENSG00000131016	0.0141133	0.00449121	3846790000	3846790000	KO up vs OCT4	3507.66	4218710000000000	3.42832	6.01947	2492.35	2691.32	1	0	0	0	0	0		0	0	0	0	0	0	0
6433	ENSG00000131023	0.0218263	0.00662774	4.74733	4.74733	KO up vs OCT4	1.67281	13.4727	3.22598	5.20725	12.1277	15.1385	1	0	0	0	0	0		0	0	0	0	0	0	0
6502	ENSG00000131469	0.0387227	0.0123278	7.58948e+32	7.58948e+32	KO up vs OCT4	259670000	2.21821e+57	2.90338	4.21888	28660.4	44156.8	1	0	0	0	0	0		0	0	0	0	0	0	0
6503	ENSG00000131470	0.016046	0.0132574	8.38247	8.38247	KO up vs OCT4	1.68739	41.6416	2.86549	5.77469	31.762	35.7513	1	0	0	0	0	0		0	0	0	0	0	0	0
6536	ENSG00000131732	0.0283094	0.0143185	9.57109	9.57109	KO up vs OCT4	1.70166	53.8332	2.82532	4.74807	30.3186	41.5054	1	0	0	0	0	0		0	0	0	0	0	0	0
6548	ENSG00000131788	0.0108562	0.00318129	6.45463	6.45463	KO up vs OCT4	2.11337	19.7136	3.60825	6.53517	17.4388	17.345	1	0	0	0	0	0		0	0	0	0	0	0	0
6550	ENSG00000131795	0.028404	0.00959909	2793.61	2793.61	KO up vs OCT4	9.81628	795034	3.03355	4.74229	324.176	444.33	1	0	0	0	0	0		0	0	0	0	0	0	0
6553	ENSG00000131828	0.0266158	0.00844816	1836.5	1836.5	KO up vs OCT4	9.75608	345705	3.09991	4.85532	285.127	381.71	1	0	0	0	0	0		0	0	0	0	0	0	0
6596	ENSG00000132155	0.0352461	0.0110986	8.18884	8.18884	KO up vs OCT4	1.76305	38.0346	2.95806	4.37514	22.0878	32.8152	1	0	0	0	0	0		0	0	0	0	0	0	0
6611	ENSG00000132286	0.00176148	0.000614303	2743.64	2743.64	KO up vs OCT4	60.5345	124352	4.48466	10.7435	334.504	202.381	1	0	0	0	0	0		0	0	0	0	0	0	0
6637	ENSG00000132424	0.0155197	0.0136076	7450.09	7450.09	KO up vs OCT4	8.68792	6388620	2.85189	5.83783	570.052	634.711	1	0	0	0	0	0		0	0	0	0	0	0	0
6647	ENSG00000132466	0.00113854	0.00036059	20411.2	20411.2	KO up vs OCT4	229.775	1813160	4.77834	11.9409	514.558	280.098	1	0	0	0	0	0		0	0	0	0	0	0	0
6652	ENSG00000132478	0.00930746	0.00285518	4.22424	4.22424	KO up vs OCT4	1.80668	9.8768	3.66486	6.84753	10.574	10.0374	1	0	0	0	0	0		0	0	0	0	0	0	0
6661	ENSG00000132522	0.000607629	0.000159567	2.68421	2.68421	KO up vs OCT4	1.7866	4.0328	5.24014	13.8113	4.89909	2.30565	1	0	0	0	0	0		0	0	0	0	0	0	0
6667	ENSG00000132561	0.00142468	0.000453433	115557	115557	KO up vs OCT4	514.415	25958600	4.65132	11.3157	710.12	407.909	1	0	0	0	0	0		0	0	0	0	0	0	0
6675	ENSG00000132604	0.000621133	0.000174727	9.20032	9.20032	KO up vs OCT4	3.65135	23.1821	5.18792	13.7428	25.1238	11.883	1	0	0	0	0	0		0	0	0	0	0	0	0
6688	ENSG00000132670	0.00496283	0.00172346	250.669	250.669	KO up vs OCT4	12.0364	5220.44	3.93062	8.20336	161.878	128.265	1	0	0	0	0	0		0	0	0	0	0	0	0
6702	ENSG00000132716	0.00706782	0.00207291	2.96283	2.96283	KO up vs OCT4	1.60638	5.46468	3.8331	7.42491	5.95603	5.21409	1	0	0	0	0	0		0	0	0	0	0	0	0
6739	ENSG00000132950	0.026895	0.0137059	3.50693	3.50693	KO up vs OCT4	1.35391	9.08376	2.84813	4.83711	9.37916	12.6035	1	0	0	0	0	0		0	0	0	0	0	0	0
6747	ENSG00000132970	6.66988e-05	1.95568e-05	489.094	489.094	KO up vs OCT4	62.7571	3811.72	6.51552	22.0336	198.846	58.6604	1	0	0	0	0	0		0	0	0	0	0	0	0
6758	ENSG00000133056	0.00252102	0.000681595	2.4102	2.4102	KO up vs OCT4	1.56911	3.70212	4.42802	9.81815	3.87148	2.56307	1	0	0	0	0	0		0	0	0	0	0	0	0
6771	ENSG00000133110	0.0151674	0.00488204	2.18129	2.18129	KO up vs OCT4	1.32597	3.58835	3.38489	5.8815	3.11951	3.44756	1	0	0	0	0	0		0	0	0	0	0	0	0
6788	ENSG00000133193	0.00123589	0.000332863	290.186	290.186	KO up vs OCT4	22.8855	3679.53	4.82296	11.7096	161.716	89.7681	1	0	0	0	0	0		0	0	0	0	0	0	0
6811	ENSG00000133422	3.32073e-05	1.32583e-05	12.3988	12.3988	KO up vs OCT4	5.55084	27.6948	6.76782	25.2654	34.9294	8.98625	1	0	0	0	0	0		0	0	0	0	0	0	0
6827	ENSG00000133624	0.00149714	0.00048877	5.70226	5.70226	KO up vs OCT4	2.52197	12.893	4.60996	11.1802	15.9286	9.26058	1	0	0	0	0	0		0	0	0	0	0	0	0
6846	ENSG00000133773	0.0221702	0.00693952	29.3177	29.3177	KO up vs OCT4	3.00121	286.393	3.2021	5.17912	57.5898	72.2775	1	0	0	0	0	0		0	0	0	0	0	0	0
6861	ENSG00000133884	0.00110148	0.00435808	5.65382	5.65382	KO up vs OCT4	1.90725	16.76	3.44399	12.0351	30.4211	16.4301	1	0	0	0	0	0		0	0	0	0	0	0	0
6875	ENSG00000134013	0.000264204	0.000692783	30.6502	30.6502	KO up vs OCT4	5.75136	163.341	4.41917	16.5879	99.4083	38.9534	1	0	0	0	0	0		0	0	0	0	0	0	0
6881	ENSG00000134046	0.000496455	0.000159217	34.2746	34.2746	KO up vs OCT4	7.98541	147.111	5.24141	14.4527	65.6561	29.5284	1	0	0	0	0	0		0	0	0	0	0	0	0
6891	ENSG00000134107	0.0289949	0.0119216	419.427	419.427	KO up vs OCT4	4.81756	36516.2	2.92083	4.70674	201.008	277.592	1	0	0	0	0	0		0	0	0	0	0	0	0
6903	ENSG00000134186	0.0024011	0.000694435	1988.51	1988.51	KO up vs OCT4	48.476	81570	4.41787	9.94096	293.538	191.933	1	0	0	0	0	0		0	0	0	0	0	0	0
6944	ENSG00000134333	0.00915876	0.00296673	5.5404e+27	5.5404e+27	KO up vs OCT4	199136000000	1.54146e+44	3.64479	6.88064	21116.9	19948.7	1	0	0	0	0	0		0	0	0	0	0	0	0
6973	ENSG00000134531	0.0225296	0.0104717	2.16879	2.16879	KO up vs OCT4	1.23923	3.79563	2.98831	5.15027	3.45336	4.35839	1	0	0	0	0	0		0	0	0	0	0	0	0
6975	ENSG00000134533	9.99529e-05	4.41889e-05	6.50023	6.50023	KO up vs OCT4	3.31442	12.7482	6.00376	20.312	19.7258	6.3124	1	0	0	0	0	0		0	0	0	0	0	0	0
6984	ENSG00000134575	0.00313256	0.000859626	4.04543	4.04543	KO up vs OCT4	2.00531	8.16109	4.30228	9.28191	9.7856	6.85272	1	0	0	0	0	0		0	0	0	0	0	0	0
6989	ENSG00000134597	0.0400834	0.0128024	18.8348	18.8348	KO up vs OCT4	2.08834	169.871	2.88369	4.16208	43.095	67.3024	1	0	0	0	0	0		0	0	0	0	0	0	0
6994	ENSG00000134644	0.00320163	0.00129133	7578.69	7578.69	KO up vs OCT4	67.1962	854760	4.08398	9.22904	441.147	310.699	1	0	0	0	0	0		0	0	0	0	0	0	0
7005	ENSG00000134748	0.0222421	0.00974974	42.5268	42.5268	KO up vs OCT4	2.92208	618.918	3.02545	5.17331	79.4094	99.7739	1	0	0	0	0	0		0	0	0	0	0	0	0
7021	ENSG00000134817	6.34231e-07	1.26023e-06	55.9122	55.9122	KO up vs OCT4	19.9295	156.862	8.42673	51.9001	118.225	14.8066	1	0	0	0	0	0		0	0	0	0	0	0	0
7022	ENSG00000134824	0.0018432	0.000702388	9267.25	9267.25	KO up vs OCT4	105.771	811964	4.41168	10.6236	454.985	278.381	1	0	0	0	0	0		0	0	0	0	0	0	0
7040	ENSG00000134909	0.00328654	0.000897852	8.52249	8.52249	KO up vs OCT4	2.88885	25.1425	4.27882	9.16583	22.9637	16.2848	1	0	0	0	0	0		0	0	0	0	0	0	0
7041	ENSG00000134910	0.00301332	0.00201612	1813.43	1813.43	KO up vs OCT4	26.8517	122470	3.84775	9.37642	356.19	246.921	1	0	0	0	0	0		0	0	0	0	0	0	0
7054	ENSG00000135040	0.0118417	0.00346643	34.5331	34.5331	KO up vs OCT4	4.03321	295.679	3.56338	6.36208	62.7973	64.1587	1	0	0	0	0	0		0	0	0	0	0	0	0
7073	ENSG00000135111	0.000904091	0.00027112	250.387	250.387	KO up vs OCT4	22.3478	2805.36	4.93806	12.6068	157.556	81.2348	1	0	0	0	0	0		0	0	0	0	0	0	0
7084	ENSG00000135205	2.74823e-07	7.06525e-08	2.88853	2.88853	KO up vs OCT4	2.33774	3.56908	10.8319	59.9186	5.74072	0.622756	1	0	0	0	0	0		0	0	0	0	0	0	0
7104	ENSG00000135315	0.0225002	0.00780167	9.64345	9.64345	KO up vs OCT4	2.02927	45.8275	3.14127	5.15261	26.7938	33.8003	1	0	0	0	0	0		0	0	0	0	0	0	0
7105	ENSG00000135316	0.00805851	0.00254284	6586630	6586630	KO up vs OCT4	732.373	59237100000	3.72562	7.14671	1268.03	1153.29	1	0	0	0	0	0		0	0	0	0	0	0	0
7110	ENSG00000135334	0.00193674	0.000834652	31.3286	31.3286	KO up vs OCT4	5.59155	175.529	4.31821	10.4937	66.7069	41.3197	1	0	0	0	0	0		0	0	0	0	0	0	0
7113	ENSG00000135341	0.0197256	0.00760594	25.9309	25.9309	KO up vs OCT4	2.78965	241.037	3.15447	5.39095	57.3616	69.1623	1	0	0	0	0	0		0	0	0	0	0	0	0
7123	ENSG00000135387	0.00681776	0.00207117	22817000000	22817000000	KO up vs OCT4	33183.9	1.56888e+16	3.83354	7.50229	2901.27	2513.67	1	0	0	0	0	0		0	0	0	0	0	0	0
7125	ENSG00000135392	0.0220612	0.0112458	11.2524	11.2524	KO up vs OCT4	1.91294	66.1892	2.9512	5.18799	34.8683	43.6862	1	0	0	0	0	0		0	0	0	0	0	0	0
7153	ENSG00000135486	0.0280412	0.0102242	4.55736e+68	4.55736e+68	KO up vs OCT4	1.69156e+19	1.22784e+118	3.00075	4.76455	132122	180247	1	0	0	0	0	0		0	0	0	0	0	0	0
7170	ENSG00000135596	0.000155318	6.73754e-05	606.606	606.606	KO up vs OCT4	54.5596	6744.39	5.74751	18.5541	230.409	80.7184	1	0	0	0	0	0		0	0	0	0	0	0	0
7220	ENSG00000135862	0.000103633	0.00089594	1536.71	1536.71	KO up vs OCT4	37.8545	62382.7	4.27997	20.1633	592.045	190.857	1	0	0	0	0	0		0	0	0	0	0	0	0
7221	ENSG00000135870	0.0063315	0.0018637	9.93257	9.93257	KO up vs OCT4	2.77474	35.555	3.88925	7.6626	26.6754	22.6281	1	0	0	0	0	0		0	0	0	0	0	0	0
7227	ENSG00000135905	0.000821151	0.000214445	15.5978	15.5978	KO up vs OCT4	4.83919	50.275	5.07084	12.8918	37.8008	19.0591	1	0	0	0	0	0		0	0	0	0	0	0	0
7256	ENSG00000136010	0.00470623	0.00328913	3.93449	3.93449	KO up vs OCT4	1.72576	8.97004	3.59082	8.32394	12.1014	9.44972	1	0	0	0	0	0		0	0	0	0	0	0	0
7261	ENSG00000136040	0.000102141	3.61037e-05	11.6048	11.6048	KO up vs OCT4	4.89038	27.5381	6.12853	20.2228	32.3262	10.3903	1	0	0	0	0	0		0	0	0	0	0	0	0
7271	ENSG00000136100	0.0213794	0.00646949	10.9003	10.9003	KO up vs OCT4	2.21503	53.6406	3.23853	5.24457	28.5075	35.3315	1	0	0	0	0	0		0	0	0	0	0	0	0
7296	ENSG00000136205	0.000864968	0.000267174	7.28995	7.28995	KO up vs OCT4	3.06139	17.3592	4.94632	12.7373	20.5248	10.474	1	0	0	0	0	0		0	0	0	0	0	0	0
7298	ENSG00000136213	0.0120408	0.0047578	2.73511	2.73511	KO up vs OCT4	1.44272	5.18524	3.3983	6.32913	5.54312	5.69278	1	0	0	0	0	0		0	0	0	0	0	0	0
7302	ENSG00000136238	0.0047665	0.00389274	46488900	46488900	KO up vs OCT4	868.035	2489780000000	3.50285	8.29495	2105.15	1649.62	1	0	0	0	0	0		0	0	0	0	0	0	0
7333	ENSG00000136436	0.00219755	0.00058736	10.8117	10.8117	KO up vs OCT4	3.45581	33.8252	4.50916	10.1666	28.3111	18.1007	1	0	0	0	0	0		0	0	0	0	0	0	0
7370	ENSG00000136682	0.00148669	0.000521736	3.86421	3.86421	KO up vs OCT4	2.04074	7.31702	4.57408	11.1993	9.77176	5.67146	1	0	0	0	0	0		0	0	0	0	0	0	0
7387	ENSG00000136738	0.00408496	0.00141454	82.5345	82.5345	KO up vs OCT4	7.77262	876.403	4.03544	8.65036	103.36	77.6662	1	0	0	0	0	0		0	0	0	0	0	0	0
7389	ENSG00000136754	0.0049203	0.00274172	12.5016	12.5016	KO up vs OCT4	2.8448	54.9389	3.68611	8.22284	38.5739	30.4919	1	0	0	0	0	0		0	0	0	0	0	0	0
7397	ENSG00000136813	0.00844918	0.00499746	1056.9	1056.9	KO up vs OCT4	12.2186	91421.5	3.37273	7.04768	300.108	276.786	1	0	0	0	0	0		0	0	0	0	0	0	0
7399	ENSG00000136819	0.0139212	0.00610637	23.6858	23.6858	KO up vs OCT4	2.92422	191.852	3.26854	6.0459	56.6312	60.8847	1	0	0	0	0	0		0	0	0	0	0	0	0
7400	ENSG00000136824	0.0207734	0.00721058	1550.8	1550.8	KO up vs OCT4	10.5806	227302	3.18219	5.29664	282.034	346.11	1	0	0	0	0	0		0	0	0	0	0	0	0
7409	ENSG00000136848	0.0334924	0.013263	4.95119	4.95119	KO up vs OCT4	1.48221	16.5391	2.86526	4.46086	13.8905	20.2401	1	0	0	0	0	0		0	0	0	0	0	0	0
7437	ENSG00000136932	0.0121102	0.00479112	2.93378	2.93378	KO up vs OCT4	1.47896	5.81965	3.39467	6.31778	6.3448	6.5278	1	0	0	0	0	0		0	0	0	0	0	0	0
7460	ENSG00000137073	0.00740925	0.00498269	9.67341	9.67341	KO up vs OCT4	2.26238	41.3613	3.37427	7.32421	33.0983	29.3737	1	0	0	0	0	0		0	0	0	0	0	0	0
7491	ENSG00000137207	0.00101805	0.000432979	193.278	193.278	KO up vs OCT4	16.9873	2199.08	4.67682	12.261	155.192	82.2726	1	0	0	0	0	0		0	0	0	0	0	0	0
7495	ENSG00000137221	0.0107696	0.00456488	3.11209	3.11209	KO up vs OCT4	1.51909	6.37558	3.41985	6.55125	7.21302	7.15659	1	0	0	0	0	0		0	0	0	0	0	0	0
7508	ENSG00000137275	0.00370424	0.00132516	10.6099	10.6099	KO up vs OCT4	3.02891	37.1649	4.0702	8.88012	29.8716	21.8652	1	0	0	0	0	0		0	0	0	0	0	0	0
7513	ENSG00000137312	0.00140849	0.000844472	1216.31	1216.31	KO up vs OCT4	34.6224	42730.2	4.31189	11.3471	307.676	176.248	1	0	0	0	0	0		0	0	0	0	0	0	0
7538	ENSG00000137492	0.0201663	0.0060798	65.8476	65.8476	KO up vs OCT4	4.14376	1046.37	3.27081	5.3506	87.6111	106.431	1	0	0	0	0	0		0	0	0	0	0	0	0
7542	ENSG00000137500	0.0060801	0.00179472	14.5843	14.5843	KO up vs OCT4	3.31647	64.1347	3.90918	7.75116	36.3945	30.5199	1	0	0	0	0	0		0	0	0	0	0	0	0
7543	ENSG00000137501	0.000113423	6.94025e-05	2.79668	2.79668	KO up vs OCT4	1.89775	4.12144	5.72971	19.7956	6.37156	2.09214	1	0	0	0	0	0		0	0	0	0	0	0	0
7544	ENSG00000137502	1.56223e-05	5.22833e-06	2.5221	2.5221	KO up vs OCT4	1.92486	3.30465	7.39548	29.1728	4.56042	1.01611	1	0	0	0	0	0		0	0	0	0	0	0	0
7563	ENSG00000137656	0.0224676	0.00759027	660.001	660.001	KO up vs OCT4	7.7483	56219	3.15554	5.15521	218.011	274.882	1	0	0	0	0	0		0	0	0	0	0	0	0
7575	ENSG00000137710	0.0193261	0.00813052	856.48	856.48	KO up vs OCT4	7.97834	91943.6	3.11982	5.42844	254.084	304.239	1	0	0	0	0	0		0	0	0	0	0	0	0
7578	ENSG00000137720	0.00598535	0.0016747	2.28572	2.28572	KO up vs OCT4	1.45363	3.59411	3.94582	7.78564	3.41418	2.8504	1	0	0	0	0	0		0	0	0	0	0	0	0
7598	ENSG00000137809	0.0017135	0.000455012	2.83617	2.83617	KO up vs OCT4	1.7473	4.60358	4.6494	10.8169	5.43264	3.26454	1	0	0	0	0	0		0	0	0	0	0	0	0
7599	ENSG00000137812	0.0116233	0.00345314	934.014	934.014	KO up vs OCT4	14.8093	58907.8	3.56539	6.39896	235.252	238.967	1	0	0	0	0	0		0	0	0	0	0	0	0
7601	ENSG00000137815	0.00315255	0.000959464	24859.5	24859.5	KO up vs OCT4	143.721	4299940	4.24308	9.26648	526.732	369.478	1	0	0	0	0	0		0	0	0	0	0	0	0
7617	ENSG00000137868	0.0012404	0.000345668	11.0278	11.0278	KO up vs OCT4	3.74518	32.4714	4.80189	11.6994	29.2081	16.2275	1	0	0	0	0	0		0	0	0	0	0	0	0
7633	ENSG00000137959	3.80115e-05	9.70965e-06	2.23854	2.23854	KO up vs OCT4	1.74404	2.87325	6.97411	24.6119	3.28275	0.866974	1	0	0	0	0	0		0	0	0	0	0	0	0
7635	ENSG00000137962	0.00349755	0.00202512	2.15633	2.15633	KO up vs OCT4	1.40033	3.32045	3.8454	9.01657	3.59692	2.593	1	0	0	0	0	0		0	0	0	0	0	0	0
7653	ENSG00000138041	0.0222575	0.00679273	33.0236	33.0236	KO up vs OCT4	3.14526	346.731	3.2132	5.17207	61.2103	76.9261	1	0	0	0	0	0		0	0	0	0	0	0	0
7659	ENSG00000138073	0.000392842	0.000607078	42.1013	42.1013	KO up vs OCT4	6.9656	254.467	4.49112	15.221	105.459	45.0355	1	0	0	0	0	0		0	0	0	0	0	0	0
7668	ENSG00000138092	0.0297897	0.0107557	5.38598	5.38598	KO up vs OCT4	1.58537	18.2978	2.97439	4.66021	14.9204	20.8108	1	0	0	0	0	0		0	0	0	0	0	0	0
7688	ENSG00000138175	0.0172576	0.00531243	12.2033	12.2033	KO up vs OCT4	2.4206	61.5221	3.34094	5.638	31.5828	36.4115	1	0	0	0	0	0		0	0	0	0	0	0	0
7689	ENSG00000138180	0.0166121	0.00525816	20728.7	20728.7	KO up vs OCT4	33.8674	12687100	3.34628	5.7094	503.228	572.912	1	0	0	0	0	0		0	0	0	0	0	0	0
7699	ENSG00000138286	0.0274475	0.00879622	2.71385	2.71385	KO up vs OCT4	1.34696	5.46784	3.07894	4.8017	5.04388	6.82784	1	0	0	0	0	0		0	0	0	0	0	0	0
7700	ENSG00000138293	0.0271733	0.00838652	32397.4	32397.4	KO up vs OCT4	23.4927	44677400	3.10372	4.81917	539.114	727.146	1	0	0	0	0	0		0	0	0	0	0	0	0
7708	ENSG00000138326	0.00987045	0.00319288	3.48779e+31	3.48779e+31	KO up vs OCT4	4437070000000	2.7416e+50	3.60635	6.72747	27260.4	26338.7	1	0	0	0	0	0		0	0	0	0	0	0	0
7730	ENSG00000138433	0.0076555	0.0021876	153.433	153.433	KO up vs OCT4	8.805	2673.68	3.80473	7.25485	126.844	113.646	1	0	0	0	0	0		0	0	0	0	0	0	0
7745	ENSG00000138587	0.000100842	3.22352e-05	108.236	108.236	KO up vs OCT4	21.1543	553.787	6.1991	20.2755	115.663	37.0798	1	0	0	0	0	0		0	0	0	0	0	0	0
7754	ENSG00000138615	0.00099004	0.000375913	3.54418	3.54418	KO up vs OCT4	1.99462	6.29753	4.75518	12.3417	8.73018	4.59791	1	0	0	0	0	0		0	0	0	0	0	0	0
7760	ENSG00000138639	5.77788e-07	1.43303e-07	2.64474	2.64474	KO up vs OCT4	2.15229	3.24986	10.1977	52.7436	4.79295	0.590672	1	0	0	0	0	0		0	0	0	0	0	0	0
7779	ENSG00000138688	0.0102319	0.00295018	6.8524	6.8524	KO up vs OCT4	2.19186	21.4226	3.64771	6.65448	18.5073	18.0777	1	0	0	0	0	0		0	0	0	0	0	0	0
7790	ENSG00000138756	0.000412109	0.000114462	6.41678	6.41678	KO up vs OCT4	3.06413	13.4378	5.43317	15.0616	17.6147	7.60181	1	0	0	0	0	0		0	0	0	0	0	0	0
7807	ENSG00000138795	9.65239e-06	4.12255e-06	203.826	203.826	KO up vs OCT4	44.6152	931.182	7.56144	31.9156	157.675	32.1123	1	0	0	0	0	0		0	0	0	0	0	0	0
7810	ENSG00000138801	0.0120886	0.0036374	14840300	14840300	KO up vs OCT4	620.482	354941000000	3.53824	6.32131	1375.52	1414.4	1	0	0	0	0	0		0	0	0	0	0	0	0
7878	ENSG00000139350	0.0062596	0.00175638	591.862	591.862	KO up vs OCT4	17.565	19943.1	3.92061	7.68751	203.59	172.141	1	0	0	0	0	0		0	0	0	0	0	0	0
7881	ENSG00000139354	0.0339868	0.0106753	11.4322	11.4322	KO up vs OCT4	1.95251	66.9373	2.97829	4.43618	29.6602	43.4589	1	0	0	0	0	0		0	0	0	0	0	0	0
7908	ENSG00000139579	0.0129582	0.00590033	83.9733	83.9733	KO up vs OCT4	4.56318	1545.31	3.28638	6.18502	112.305	118.025	1	0	0	0	0	0		0	0	0	0	0	0	0
7911	ENSG00000139613	0.000305517	0.000106019	1393.88	1393.88	KO up vs OCT4	80.2156	24221	5.47812	16.0776	280.548	113.423	1	0	0	0	0	0		0	0	0	0	0	0	0
7941	ENSG00000139746	0.0017372	0.000570388	1732.07	1732.07	KO up vs OCT4	49.2548	60909.3	4.5252	10.7803	292.471	176.345	1	0	0	0	0	0		0	0	0	0	0	0	0
7979	ENSG00000140044	8.53562e-05	0.000667561	5.46549	5.46549	KO up vs OCT4	2.39149	12.4908	4.43934	20.9712	30.6678	9.50547	1	0	0	0	0	0		0	0	0	0	0	0	0
7983	ENSG00000140092	1.60923e-06	4.63772e-07	3.51973	3.51973	KO up vs OCT4	2.62004	4.72838	9.20939	44.1061	8.22724	1.21247	1	0	0	0	0	0		0	0	0	0	0	0	0
8012	ENSG00000140350	0.0100085	0.00288244	828160	828160	KO up vs OCT4	265.917	2579190000	3.65988	6.69923	927.855	900.26	1	0	0	0	0	0		0	0	0	0	0	0	0
8014	ENSG00000140367	0.0324867	0.0133137	19.5208	19.5208	KO up vs OCT4	2.07398	183.735	2.86328	4.51239	48.5531	69.9396	1	0	0	0	0	0		0	0	0	0	0	0	0
8037	ENSG00000140471	1.05042e-05	4.79964e-06	2.1204	2.1204	KO up vs OCT4	1.70539	2.63639	7.45495	31.4191	3.19058	0.660071	1	0	0	0	0	0		0	0	0	0	0	0	0
8084	ENSG00000140829	0.000949086	0.000252779	186.315	186.315	KO up vs OCT4	19.2715	1801.28	4.97758	12.4646	137.344	71.6217	1	0	0	0	0	0		0	0	0	0	0	0	0
8090	ENSG00000140848	4.46012e-06	1.65318e-06	4.77762	4.77762	KO up vs OCT4	3.16784	7.20542	8.22283	36.7604	13.2852	2.3491	1	0	0	0	0	0		0	0	0	0	0	0	0
8112	ENSG00000140988	0.00224911	0.000670978	9.13369e+103	9.13369e+103	KO up vs OCT4	2.17454e+53	3.83641e+154	4.43656	10.1072	293966	189051	1	0	0	0	0	0		0	0	0	0	0	0	0
8114	ENSG00000140992	3.48026e-05	9.26194e-06	2.09059	2.09059	KO up vs OCT4	1.66535	2.6244	7.00571	25.0369	2.77157	0.719547	1	0	0	0	0	0		0	0	0	0	0	0	0
8121	ENSG00000141027	0.00737907	0.00563747	15.7147	15.7147	KO up vs OCT4	2.60326	94.8624	3.31007	7.3329	50.735	44.9724	1	0	0	0	0	0		0	0	0	0	0	0	0
8129	ENSG00000141084	0.000197231	5.13268e-05	2.36683	2.36683	KO up vs OCT4	1.7276	3.2426	5.91215	17.65	3.74462	1.37904	1	0	0	0	0	0		0	0	0	0	0	0	0
8136	ENSG00000141141	0.0288982	0.0100154	7.96901	7.96901	KO up vs OCT4	1.79786	35.3226	3.01148	4.7125	22.3642	30.8472	1	0	0	0	0	0		0	0	0	0	0	0	0
8144	ENSG00000141232	0.00333082	0.000906758	16461.4	16461.4	KO up vs OCT4	121.598	2228460	4.2735	9.13361	470.972	335.17	1	0	0	0	0	0		0	0	0	0	0	0	0
8162	ENSG00000141380	0.00852491	0.00392435	12886.9	12886.9	KO up vs OCT4	37.3398	4447590	3.49863	7.0291	513.855	475.176	1	0	0	0	0	0		0	0	0	0	0	0	0
8168	ENSG00000141424	0.0132843	0.00529282	2013.86	2013.86	KO up vs OCT4	14.7489	274979	3.34287	6.1366	317.541	336.345	1	0	0	0	0	0		0	0	0	0	0	0	0
8176	ENSG00000141441	0.000200314	7.4665e-05	2.22366	2.22366	KO up vs OCT4	1.64134	3.01256	5.68593	17.5924	3.47194	1.2828	1	0	0	0	0	0		0	0	0	0	0	0	0
8181	ENSG00000141452	0.00587	0.00164521	3.82069	3.82069	KO up vs OCT4	1.83727	7.94531	3.95523	7.82847	8.9828	7.45844	1	0	0	0	0	0		0	0	0	0	0	0	0
8238	ENSG00000141753	0.00435875	0.00506536	10963.1	10963.1	KO up vs OCT4	27.9768	4296030	3.36571	8.4999	648.679	496.055	1	0	0	0	0	0		0	0	0	0	0	0	0
8257	ENSG00000141985	0.000426966	0.000224167	47.6025	47.6025	KO up vs OCT4	9.10596	248.848	5.04563	14.9444	87.5109	38.0624	1	0	0	0	0	0		0	0	0	0	0	0	0
8258	ENSG00000141994	0.0286032	0.0088612	3.88124	3.88124	KO up vs OCT4	1.49692	10.0633	3.07511	4.73021	9.19108	12.6299	1	0	0	0	0	0		0	0	0	0	0	0	0
8276	ENSG00000142186	7.62439e-06	3.79287e-06	220.986	220.986	KO up vs OCT4	47.8328	1020.94	7.62022	33.3351	167.124	32.5874	1	0	0	0	0	0		0	0	0	0	0	0	0
8312	ENSG00000142534	0.00177062	0.000492549	8.98847e+307	8.98847e+307	KO up vs OCT4	7.68016e+181	8.98847e+307	4.60572	10.7297	3144300	1904790	1	0	0	0	0	0		0	0	0	0	0	0	0
8319	ENSG00000142552	0.0283732	0.0104903	3.93619	3.93619	KO up vs OCT4	1.4613	10.6026	2.98739	4.74417	9.97113	13.6615	1	0	0	0	0	0		0	0	0	0	0	0	0
8334	ENSG00000142657	0.00731744	0.00454688	1307800000	1307800000	KO up vs OCT4	2295.91	744948000000000	3.42191	7.35075	2763.61	2443.76	1	0	0	0	0	0		0	0	0	0	0	0	0
8336	ENSG00000142669	4.11066e-05	2.22304e-05	2569880000000000	2569880000000000	KO up vs OCT4	17191400000	3.84164e+20	6.43356	24.2395	7366.19	1975.3	1	0	0	0	0	0		0	0	0	0	0	0	0
8338	ENSG00000142676	0.00492896	0.00141481	5.0899e+174	5.0899e+174	KO up vs OCT4	1.49754e+81	1.72997e+268	4.03534	8.21886	816003	645347	1	0	0	0	0	0		0	0	0	0	0	0	0
8349	ENSG00000142751	3.48032e-05	1.63039e-05	2.54466	2.54466	KO up vs OCT4	1.87722	3.44942	6.63291	25.0368	4.95969	1.28762	1	0	0	0	0	0		0	0	0	0	0	0	0
8378	ENSG00000143079	0.00433279	0.00136295	4.28831	4.28831	KO up vs OCT4	1.97444	9.31384	4.05522	8.51369	10.9632	8.37015	1	0	0	0	0	0		0	0	0	0	0	0	0
8392	ENSG00000143155	0.000674731	0.000177356	179028	179028	KO up vs OCT4	1153.09	27795700	5.17935	13.4866	734.813	354.15	1	0	0	0	0	0		0	0	0	0	0	0	0
8426	ENSG00000143314	0.0298566	0.00930594	168.906	168.906	KO up vs OCT4	4.46265	6392.88	3.04967	4.65636	131.6	183.705	1	0	0	0	0	0		0	0	0	0	0	0	0
8435	ENSG00000143337	0.00778287	0.0022138	3.39772	3.39772	KO up vs OCT4	1.69463	6.81239	3.79846	7.21998	7.4789	6.7331	1	0	0	0	0	0		0	0	0	0	0	0	0
8467	ENSG00000143442	0.00831319	0.00239516	29.1046	29.1046	KO up vs OCT4	4.18945	202.193	3.75704	7.08154	56.953	52.276	1	0	0	0	0	0		0	0	0	0	0	0	0
8499	ENSG00000143569	0.00197603	0.00116919	5906380	5906380	KO up vs OCT4	1719.23	20291300000	4.13705	10.4412	1481.63	922.361	1	0	0	0	0	0		0	0	0	0	0	0	0
8515	ENSG00000143633	0.00372816	0.00101919	3.30563	3.30563	KO up vs OCT4	1.78994	6.10479	4.21062	8.8649	7.14106	5.23603	1	0	0	0	0	0		0	0	0	0	0	0	0
8530	ENSG00000143768	0.000197301	0.000571195	5.45757	5.45757	KO up vs OCT4	2.42711	12.2718	4.52443	17.6487	24.8051	9.13569	1	0	0	0	0	0		0	0	0	0	0	0	0
8548	ENSG00000143850	0.000221276	8.69787e-05	3.55042	3.55042	KO up vs OCT4	2.17673	5.79104	5.59501	17.2264	8.82635	3.33043	1	0	0	0	0	0		0	0	0	0	0	0	0
8551	ENSG00000143862	0.000659076	0.000323867	1371.49	1371.49	KO up vs OCT4	54.4987	34514.6	4.83828	13.5589	301.96	144.756	1	0	0	0	0	0		0	0	0	0	0	0	0
8558	ENSG00000143891	0.0125725	0.00455941	5.21964	5.21964	KO up vs OCT4	1.83814	14.8218	3.42048	6.24412	14.5591	15.1557	1	0	0	0	0	0		0	0	0	0	0	0	0
8561	ENSG00000143924	0.000117874	3.57978e-05	219026000000	219026000000	KO up vs OCT4	22197300	2161180000000000	6.13381	19.6403	3556.09	1176.9	1	0	0	0	0	0		0	0	0	0	0	0	0
8575	ENSG00000144021	0.037559	0.0119024	38.9126	38.9126	KO up vs OCT4	2.59614	583.247	2.92167	4.26932	66.9827	101.981	1	0	0	0	0	0		0	0	0	0	0	0	0
8578	ENSG00000144029	0.00534313	0.00155714	16.1998	16.1998	KO up vs OCT4	3.57855	73.3348	3.98441	8.03728	39.2302	31.7267	1	0	0	0	0	0		0	0	0	0	0	0	0
8586	ENSG00000144048	0.00738015	0.00209957	6.19623	6.19623	KO up vs OCT4	2.21254	17.3526	3.82636	7.33258	16.6455	14.7555	1	0	0	0	0	0		0	0	0	0	0	0	0
8603	ENSG00000144191	0.000126935	5.15103e-05	2.80422	2.80422	KO up vs OCT4	1.92361	4.08797	5.90998	19.3442	5.88291	1.97677	1	0	0	0	0	0		0	0	0	0	0	0	0
8607	ENSG00000144224	0.000906552	0.000243434	24954.3	24954.3	KO up vs OCT4	313.928	1983630	4.99888	12.5988	516.354	266.398	1	0	0	0	0	0		0	0	0	0	0	0	0
8658	ENSG00000144591	0.007127	0.00243352	2.50507	2.50507	KO up vs OCT4	1.47564	4.25264	3.74869	7.40706	4.44079	3.89698	1	0	0	0	0	0		0	0	0	0	0	0	0
8685	ENSG00000144747	0.0190856	0.00920259	10.6728	10.6728	KO up vs OCT4	2.00094	56.9275	3.05547	5.45143	32.7037	38.9942	1	0	0	0	0	0		0	0	0	0	0	0	0
8690	ENSG00000144792	0.00899548	0.00257249	6.47898	6.47898	KO up vs OCT4	2.18861	19.1798	3.71953	6.91772	17.4419	16.3886	1	0	0	0	0	0		0	0	0	0	0	0	0
8693	ENSG00000144815	0.00163883	0.000646964	2.41958	2.41958	KO up vs OCT4	1.57656	3.71338	4.45641	10.936	4.29521	2.55294	1	0	0	0	0	0		0	0	0	0	0	0	0
8700	ENSG00000144840	0.0375801	0.0124185	2.57273	2.57273	KO up vs OCT4	1.2724	5.20195	2.89955	4.26838	4.52924	6.89723	1	0	0	0	0	0		0	0	0	0	0	0	0
8721	ENSG00000145022	0.00415563	0.00114291	2.74876	2.74876	KO up vs OCT4	1.62365	4.65354	4.14921	8.61043	5.10877	3.8566	1	0	0	0	0	0		0	0	0	0	0	0	0
8724	ENSG00000145041	0.0141055	0.00568039	6.72589	6.72589	KO up vs OCT4	1.9358	23.3689	3.30612	6.02053	19.9901	21.5821	1	0	0	0	0	0		0	0	0	0	0	0	0
8725	ENSG00000145050	0.000550823	0.000173697	17875.4	17875.4	KO up vs OCT4	303.863	1051570	5.19131	14.1204	501.824	231.004	1	0	0	0	0	0		0	0	0	0	0	0	0
8739	ENSG00000145216	0.0100197	0.00334211	85.3829	85.3829	KO up vs OCT4	5.84356	1247.57	3.58247	6.69697	103.102	100.07	1	0	0	0	0	0		0	0	0	0	0	0	0
8745	ENSG00000145246	2.8916e-06	6.72552e-07	3.06457	3.06457	KO up vs OCT4	2.336	4.02036	8.9124	39.743	6.26938	1.02536	1	0	0	0	0	0		0	0	0	0	0	0	0
8762	ENSG00000145362	0.000903127	0.000252177	13.8087	13.8087	KO up vs OCT4	4.42016	43.1389	4.97893	12.61	35.026	18.0547	1	0	0	0	0	0		0	0	0	0	0	0	0
8784	ENSG00000145536	0.0161263	0.00738709	6.67415	6.67415	KO up vs OCT4	1.83021	24.3383	3.16963	5.76527	20.6583	23.291	1	0	0	0	0	0		0	0	0	0	0	0	0
8811	ENSG00000145741	0.0201855	0.00608341	1.38139e+28	1.38139e+28	KO up vs OCT4	3563620000	5.35479e+46	3.2705	5.34886	20975.5	25489.7	1	0	0	0	0	0		0	0	0	0	0	0	0
8821	ENSG00000145817	0.0151697	0.0053003	76.8967	76.8967	KO up vs OCT4	4.64353	1273.41	3.34213	5.8812	99.1932	109.63	1	0	0	0	0	0		0	0	0	0	0	0	0
8823	ENSG00000145824	0.0113897	0.00352825	71413000	71413000	KO up vs OCT4	1202.01	4242730000000	3.55415	6.43932	1665.51	1681.2	1	0	0	0	0	0		0	0	0	0	0	0	0
8833	ENSG00000145864	0.000677359	0.000214726	3.42964	3.42964	KO up vs OCT4	2.02852	5.79854	5.07009	13.4747	7.95463	3.83721	1	0	0	0	0	0		0	0	0	0	0	0	0
8834	ENSG00000145868	0.0199782	0.00867502	3.62272	3.62272	KO up vs OCT4	1.47129	8.92014	3.08615	5.36769	9.32941	11.2974	1	0	0	0	0	0		0	0	0	0	0	0	0
8855	ENSG00000145996	0.0120322	0.00384188	16.6457	16.6457	KO up vs OCT4	2.94809	93.9858	3.50971	6.33054	40.6038	41.6907	1	0	0	0	0	0		0	0	0	0	0	0	0
8868	ENSG00000146066	0.0324963	0.0102127	1606.54	1606.54	KO up vs OCT4	7.91189	326214	3.00133	4.51189	272.678	392.83	1	0	0	0	0	0		0	0	0	0	0	0	0
8924	ENSG00000146463	0.0201103	0.0083413	569.95	569.95	KO up vs OCT4	6.90794	47024.6	3.10653	5.35567	223.25	270.952	1	0	0	0	0	0		0	0	0	0	0	0	0
8931	ENSG00000146540	0.0113366	0.00334625	2.35609	2.35609	KO up vs OCT4	1.40509	3.95073	3.58182	6.44863	3.68819	3.71757	1	0	0	0	0	0		0	0	0	0	0	0	0
8942	ENSG00000146674	0.000279697	7.45848e-05	344257	344257	KO up vs OCT4	2712.59	43689900	5.68658	16.3864	822.873	326.41	1	0	0	0	0	0		0	0	0	0	0	0	0
8947	ENSG00000146701	0.0024949	0.00174322	260407	260407	KO up vs OCT4	271.956	249349000	3.92459	9.84431	992.934	655.614	1	0	0	0	0	0		0	0	0	0	0	0	0
8979	ENSG00000146966	6.95604e-05	3.06862e-05	9.50218	9.50218	KO up vs OCT4	4.3525	20.7447	6.2299	21.8498	28.512	8.48191	1	0	0	0	0	0		0	0	0	0	0	0	0
8988	ENSG00000147065	7.25358e-05	0.000160613	1044850	1044850	KO up vs OCT4	3433.8	317929000	5.23637	21.6677	1516.45	454.915	1	0	0	0	0	0		0	0	0	0	0	0	0
8999	ENSG00000147124	7.4978e-06	2.01707e-06	4.19676	4.19676	KO up vs OCT4	2.85939	6.15963	8.07559	33.4379	10.5382	2.04853	1	0	0	0	0	0		0	0	0	0	0	0	0
9004	ENSG00000147140	0.000327549	0.000102227	1.12146e+30	1.12146e+30	KO up vs OCT4	1.75963e+18	7.14742e+41	5.49954	15.837	25045.2	10279.3	1	0	0	0	0	0		0	0	0	0	0	0	0
9028	ENSG00000147274	0.0349611	0.0110011	1033180000000	1033180000000	KO up vs OCT4	1792.35	5.95563e+20	2.96265	4.38873	3822.85	5661.9	1	0	0	0	0	0		0	0	0	0	0	0	0
9029	ENSG00000147316	0.0102356	0.00354759	9.04602	9.04602	KO up vs OCT4	2.36927	34.5383	3.5513	6.65376	25.565	24.9742	1	0	0	0	0	0		0	0	0	0	0	0	0
9032	ENSG00000147378	0.0010365	0.000599524	2.02956	2.02956	KO up vs OCT4	1.44463	2.85133	4.49796	12.2092	3.02059	1.60811	1	0	0	0	0	0		0	0	0	0	0	0	0
9035	ENSG00000147382	0.0133623	0.0039373	4.48285	4.48285	KO up vs OCT4	1.77431	11.3261	3.49691	6.12524	11.2636	11.9527	1	0	0	0	0	0		0	0	0	0	0	0	0
9038	ENSG00000147400	0.00832867	0.00238274	6177.9	6177.9	KO up vs OCT4	40.9848	931234	3.75978	7.07766	381.117	350.011	1	0	0	0	0	0		0	0	0	0	0	0	0
9044	ENSG00000147421	0.0220217	0.0114394	4.46902	4.46902	KO up vs OCT4	1.48868	13.416	2.94232	5.19121	13.4283	16.8138	1	0	0	0	0	0		0	0	0	0	0	0	0
9048	ENSG00000147439	0.00744411	0.00239081	4.01041	4.01041	KO up vs OCT4	1.80481	8.91139	3.758	7.31423	9.98123	8.8701	1	0	0	0	0	0		0	0	0	0	0	0	0
9050	ENSG00000147454	0.0321736	0.013454	2.96601	2.96601	KO up vs OCT4	1.30386	6.74705	2.85781	4.52881	6.5485	9.39877	1	0	0	0	0	0		0	0	0	0	0	0	0
9054	ENSG00000147471	0.000625203	0.000171283	533.157	533.157	KO up vs OCT4	39.2489	7242.41	5.19935	13.7224	199.93	94.7023	1	0	0	0	0	0		0	0	0	0	0	0	0
9082	ENSG00000147654	0.0146407	0.00523094	2.99103	2.99103	KO up vs OCT4	1.47529	6.06407	3.34898	5.949	6.36102	6.95018	1	0	0	0	0	0		0	0	0	0	0	0	0
9086	ENSG00000147677	0.0312583	0.0103848	9619.53	9619.53	KO up vs OCT4	12.8156	7220520	2.99264	4.57789	429.569	609.931	1	0	0	0	0	0		0	0	0	0	0	0	0
9100	ENSG00000147853	0.00884023	0.00260646	1018.44	1018.44	KO up vs OCT4	18.0981	57310.6	3.71265	6.95371	241.773	225.998	1	0	0	0	0	0		0	0	0	0	0	0	0
9133	ENSG00000148187	0.00866536	0.0026942	10.828	10.828	KO up vs OCT4	2.68981	43.5891	3.69528	6.99513	29.042	26.9863	1	0	0	0	0	0		0	0	0	0	0	0	0
9140	ENSG00000148229	0.0149736	0.00500052	106614	106614	KO up vs OCT4	64.1204	177268000	3.37241	5.90602	695.333	765.264	1	0	0	0	0	0		0	0	0	0	0	0	0
9149	ENSG00000148308	0.00964299	0.00279669	61.9858	61.9858	KO up vs OCT4	5.48132	700.97	3.6757	6.775	85.3234	81.86	1	0	0	0	0	0		0	0	0	0	0	0	0
9153	ENSG00000148337	6.13246e-05	2.13097e-05	3230.01	3230.01	KO up vs OCT4	216.644	48157.3	6.46055	22.4048	350.14	101.581	1	0	0	0	0	0		0	0	0	0	0	0	0
9243	ENSG00000149100	0.00565574	0.00158427	1171840	1171840	KO up vs OCT4	589.807	2328230000	3.97525	7.91067	976.612	802.458	1	0	0	0	0	0		0	0	0	0	0	0	0
9261	ENSG00000149257	0.00117427	0.00228818	1200740	1200740	KO up vs OCT4	403.523	3572960000	3.78107	11.8535	1623.18	890.09	1	0	0	0	0	0		0	0	0	0	0	0	0
9263	ENSG00000149262	0.0010326	0.000292333	11.595	11.595	KO up vs OCT4	3.93213	34.1908	4.89569	12.2201	30.5895	16.2709	1	0	0	0	0	0		0	0	0	0	0	0	0
9276	ENSG00000149346	0.00688679	0.0107936	2.11849	2.11849	KO up vs OCT4	1.22766	3.65571	2.97256	7.48061	4.76651	4.14168	1	0	0	0	0	0		0	0	0	0	0	0	0
9289	ENSG00000149483	0.000723473	0.000187619	2.43831	2.43831	KO up vs OCT4	1.67733	3.54455	5.1471	13.2733	3.97647	1.94729	1	0	0	0	0	0		0	0	0	0	0	0	0
9294	ENSG00000149503	0.0285438	0.0116569	924.412	924.412	KO up vs OCT4	6.0385	141515	2.93252	4.7338	256.48	352.174	1	0	0	0	0	0		0	0	0	0	0	0	0
9300	ENSG00000149532	0.0256551	0.00950025	35.0779	35.0779	KO up vs OCT4	2.79686	439.943	3.03893	4.91973	67.3595	88.9961	1	0	0	0	0	0		0	0	0	0	0	0	0
9312	ENSG00000149582	0.000188654	4.67649e-05	2.36994	2.36994	KO up vs OCT4	1.73424	3.23867	5.96901	17.8158	3.71942	1.35701	1	0	0	0	0	0		0	0	0	0	0	0	0
9329	ENSG00000149679	0.000601246	0.000211837	9.34325	9.34325	KO up vs OCT4	3.61074	24.1769	5.0778	13.8443	26.7875	12.5769	1	0	0	0	0	0		0	0	0	0	0	0	0
9344	ENSG00000149925	0.0170261	0.00691894	94364500000	94364500000	KO up vs OCT4	3749.44	2.37493e+18	3.20364	5.66325	3520.41	4040.56	1	0	0	0	0	0		0	0	0	0	0	0	0
9347	ENSG00000149929	0.0155704	0.00474085	13.9599	13.9599	KO up vs OCT4	2.6149	74.5262	3.40016	5.83165	35.0216	39.0353	1	0	0	0	0	0		0	0	0	0	0	0	0
9348	ENSG00000149930	0.00225437	0.00150744	2.91375	2.91375	KO up vs OCT4	1.63571	5.19034	4.00163	10.1012	7.20779	4.63812	1	0	0	0	0	0		0	0	0	0	0	0	0
9356	ENSG00000150051	0.0202154	0.00738839	2.24358	2.24358	KO up vs OCT4	1.29342	3.89173	3.16954	5.34616	3.47167	4.22095	1	0	0	0	0	0		0	0	0	0	0	0	0
9359	ENSG00000150093	0.00622734	0.00345632	83287200000	83287200000	KO up vs OCT4	20072.6	3.45583e+17	3.56491	7.69879	3826.83	3230.94	1	0	0	0	0	0		0	0	0	0	0	0	0
9368	ENSG00000150281	3.28674e-07	7.67006e-08	2.47531	2.47531	KO up vs OCT4	2.06335	2.96952	10.7566	58.1151	4.12223	0.461059	1	0	0	0	0	0		0	0	0	0	0	0	0
9387	ENSG00000150551	0.0349231	0.0115791	4.62694	4.62694	KO up vs OCT4	1.49885	14.2834	2.936	4.39055	11.9414	17.6787	1	0	0	0	0	0		0	0	0	0	0	0	0
9395	ENSG00000150636	0.000674011	0.000173266	2.34551	2.34551	KO up vs OCT4	1.64515	3.34402	5.19274	13.4899	3.63242	1.75025	1	0	0	0	0	0		0	0	0	0	0	0	0
9421	ENSG00000150907	0.0392958	0.0126957	17.7434	17.7434	KO up vs OCT4	2.06401	152.532	2.88805	4.19468	41.5585	64.3984	1	0	0	0	0	0		0	0	0	0	0	0	0
9423	ENSG00000150961	1.35524e-05	0.00143883	2.66524	2.66524	KO up vs OCT4	1.57509	4.5099	4.02639	29.9614	17.7433	3.84934	1	0	0	0	0	0		0	0	0	0	0	0	0
9437	ENSG00000151065	0.00168022	0.000807909	31.3073	31.3073	KO up vs OCT4	5.62888	174.128	4.33581	10.8692	68.5072	40.9686	1	0	0	0	0	0		0	0	0	0	0	0	0
9456	ENSG00000151233	0.0157187	0.00546779	5.61259	5.61259	KO up vs OCT4	1.8304	17.21	3.32595	5.81368	15.624	17.4685	1	0	0	0	0	0		0	0	0	0	0	0	0
9483	ENSG00000151445	0.00669144	0.00240281	46.9968	46.9968	KO up vs OCT4	5.13061	430.495	3.75537	7.54264	79.2043	68.2556	1	0	0	0	0	0		0	0	0	0	0	0	0
9506	ENSG00000151612	0.0187665	0.00626177	4.97892	4.97892	KO up vs OCT4	1.71597	14.4464	3.25549	5.48248	13.3168	15.7884	1	0	0	0	0	0		0	0	0	0	0	0	0
9523	ENSG00000151694	0.0300876	0.00936463	15.7089	15.7089	KO up vs OCT4	2.22789	110.764	3.0464	4.64314	37.9164	53.0798	1	0	0	0	0	0		0	0	0	0	0	0	0
9545	ENSG00000151849	0.0031067	0.00100096	1307.91	1307.91	KO up vs OCT4	33.2054	51516.7	4.22031	9.30205	268.7	187.759	1	0	0	0	0	0		0	0	0	0	0	0	0
9550	ENSG00000151892	0.00263665	0.000713301	574.621	574.621	KO up vs OCT4	25.4427	12977.8	4.40331	9.70595	201.895	135.207	1	0	0	0	0	0		0	0	0	0	0	0	0
9581	ENSG00000152154	0.00178179	0.00135867	3.4906	3.4906	KO up vs OCT4	1.79389	6.7921	4.05689	10.7131	10.1622	6.16578	1	0	0	0	0	0		0	0	0	0	0	0	0
9589	ENSG00000152219	0.00855351	0.00250882	10.8339	10.8339	KO up vs OCT4	2.72823	43.0214	3.73269	7.02213	28.5855	26.4601	1	0	0	0	0	0		0	0	0	0	0	0	0
9622	ENSG00000152457	0.00273381	0.000806579	2.49104	2.49104	KO up vs OCT4	1.58096	3.92502	4.3367	9.61598	4.25522	2.87635	1	0	0	0	0	0		0	0	0	0	0	0	0
9641	ENSG00000152583	7.72897e-05	3.74783e-05	421047000000000	421047000000000	KO up vs OCT4	2815400000	6.29683e+19	6.10536	21.394	6501.94	1975.45	1	0	0	0	0	0		0	0	0	0	0	0	0
9687	ENSG00000152977	8.85886e-05	6.52268e-05	158.315	158.315	KO up vs OCT4	23.7444	1055.55	5.76701	20.8145	160.378	50.083	1	0	0	0	0	0		0	0	0	0	0	0	0
9706	ENSG00000153113	0.00765976	0.00383427	3.93283	3.93283	KO up vs OCT4	1.69335	9.13403	3.51074	7.25367	11.0252	9.87963	1	0	0	0	0	0		0	0	0	0	0	0	0
9751	ENSG00000153560	0.00339132	0.00258283	9.17293	9.17293	KO up vs OCT4	2.53017	33.2557	3.71742	9.09038	32.2796	23.0813	1	0	0	0	0	0		0	0	0	0	0	0	0
9762	ENSG00000153774	0.0171957	0.00630176	2271820	2271820	KO up vs OCT4	136.125	37914800000	3.25218	5.64471	1142.18	1315.24	1	0	0	0	0	0		0	0	0	0	0	0	0
9816	ENSG00000154144	0.00153287	0.000427332	3.7465	3.7465	KO up vs OCT4	2.03733	6.88953	4.68408	11.1162	8.83051	5.16348	1	0	0	0	0	0		0	0	0	0	0	0	0
9839	ENSG00000154305	0.000294657	0.000140778	109.816	109.816	KO up vs OCT4	16.249	742.178	5.31258	16.2036	126.639	50.8006	1	0	0	0	0	0		0	0	0	0	0	0	0
9889	ENSG00000154743	0.00798887	0.00235686	2.97081	2.97081	KO up vs OCT4	1.59065	5.5485	3.76552	7.16495	5.98521	5.42975	1	0	0	0	0	0		0	0	0	0	0	0	0
9897	ENSG00000154813	0.0348086	0.0132547	41.1808	41.1808	KO up vs OCT4	2.49676	679.224	2.86559	4.39606	73.9328	109.317	1	0	0	0	0	0		0	0	0	0	0	0	0
9900	ENSG00000154832	0.0103357	0.0132735	3.85672	3.85672	KO up vs OCT4	1.39365	10.6729	2.86485	6.63407	14.7135	14.4161	1	0	0	0	0	0		0	0	0	0	0	0	0
9904	ENSG00000154864	0.0191801	0.00737093	2.32719	2.32719	KO up vs OCT4	1.30887	4.1378	3.17077	5.44236	3.85847	4.60831	1	0	0	0	0	0		0	0	0	0	0	0	0
9963	ENSG00000155463	0.00171991	0.000455379	160.11	160.11	KO up vs OCT4	15.1365	1693.59	4.64896	10.8069	128.707	77.4126	1	0	0	0	0	0		0	0	0	0	0	0	0
9994	ENSG00000155827	0.00923222	0.00408722	978.148	978.148	KO up vs OCT4	13.5707	70503	3.47743	6.86421	268.878	254.612	1	0	0	0	0	0		0	0	0	0	0	0	0
10050	ENSG00000156232	0.000101872	2.95185e-05	2.03378	2.03378	KO up vs OCT4	1.59151	2.59897	6.25422	20.2337	2.60442	0.836661	1	0	0	0	0	0		0	0	0	0	0	0	0
10064	ENSG00000156313	0.0100593	0.00294705	2.28704	2.28704	KO up vs OCT4	1.40128	3.7327	3.64827	6.68897	3.43605	3.33898	1	0	0	0	0	0		0	0	0	0	0	0	0
10082	ENSG00000156482	0.00639699	0.00179582	3.15212e+38	3.15212e+38	KO up vs OCT4	1.66344e+17	5.97308e+59	3.90886	7.6402	39256.9	33398.3	1	0	0	0	0	0		0	0	0	0	0	0	0
10099	ENSG00000156603	0.00575364	0.0016261	24.4484	24.4484	KO up vs OCT4	4.27727	139.744	3.96143	7.87267	51.2125	42.2831	1	0	0	0	0	0		0	0	0	0	0	0	0
10100	ENSG00000156639	0.000432927	0.000300816	7.46284	7.46284	KO up vs OCT4	3.06508	18.1705	4.87963	14.8987	25.254	11.0178	1	0	0	0	0	0		0	0	0	0	0	0	0
10102	ENSG00000156650	6.28089e-05	2.2724e-05	72.3711	72.3711	KO up vs OCT4	17.1304	305.747	6.41956	22.2986	99.1086	28.8899	1	0	0	0	0	0		0	0	0	0	0	0	0
10108	ENSG00000156709	0.00608876	0.00170881	45798.9	45798.9	KO up vs OCT4	126.495	16581900	3.93514	7.74804	575.736	482.998	1	0	0	0	0	0		0	0	0	0	0	0	0
10118	ENSG00000156831	0.0147887	0.00446512	18.4398	18.4398	KO up vs OCT4	2.94334	115.524	3.43136	5.92976	42.7392	46.8493	1	0	0	0	0	0		0	0	0	0	0	0	0
10119	ENSG00000156853	0.0277495	0.00963497	2.8147	2.8147	KO up vs OCT4	1.34636	5.88444	3.03161	4.78269	5.56772	7.56691	1	0	0	0	0	0		0	0	0	0	0	0	0
10139	ENSG00000156983	0.00141898	0.000406241	6.19216	6.19216	KO up vs OCT4	2.68414	14.285	4.71211	11.3267	16.9423	9.72258	1	0	0	0	0	0		0	0	0	0	0	0	0
10147	ENSG00000157045	0.0190692	0.0135944	5.82403	5.82403	KO up vs OCT4	1.53339	22.1205	2.85239	5.45302	20.7882	24.7795	1	0	0	0	0	0		0	0	0	0	0	0	0
10165	ENSG00000157191	0.0115738	0.0056104	5.71211	5.71211	KO up vs OCT4	1.8333	17.7975	3.31257	6.40745	17.7148	17.9706	1	0	0	0	0	0		0	0	0	0	0	0	0
10168	ENSG00000157212	0.0118319	0.00754784	5.50735	5.50735	KO up vs OCT4	1.71451	17.6907	3.15845	6.36372	18.5504	18.9477	1	0	0	0	0	0		0	0	0	0	0	0	0
10197	ENSG00000157450	0.000348967	9.27416e-05	9.81695	9.81695	KO up vs OCT4	4.03953	23.8574	5.55701	15.6204	26.3654	10.9713	1	0	0	0	0	0		0	0	0	0	0	0	0
10209	ENSG00000157554	0.000861175	0.000515198	2.05555	2.05555	KO up vs OCT4	1.46337	2.88737	4.581	12.7503	3.15145	1.60658	1	0	0	0	0	0		0	0	0	0	0	0	0
10218	ENSG00000157625	0.00340772	0.000936642	4.42119	4.42119	KO up vs OCT4	2.07904	9.40189	4.25603	9.07881	11.0633	7.92082	1	0	0	0	0	0		0	0	0	0	0	0	0
10222	ENSG00000157657	0.00314556	0.000876742	15.2478	15.2478	KO up vs OCT4	3.86896	60.0929	4.29165	9.27186	37.3305	26.1704	1	0	0	0	0	0		0	0	0	0	0	0	0
10224	ENSG00000157693	2.99321e-05	8.99533e-06	2.4181	2.4181	KO up vs OCT4	1.84311	3.17247	7.0253	25.7769	4.06815	1.02584	1	0	0	0	0	0		0	0	0	0	0	0	0
10249	ENSG00000157911	0.011515	0.00424902	4.30802	4.30802	KO up vs OCT4	1.72951	10.7308	3.4572	6.41757	11.442	11.589	1	0	0	0	0	0		0	0	0	0	0	0	0
10272	ENSG00000158089	4.75753e-05	0.000237596	3.21747	3.21747	KO up vs OCT4	1.94439	5.32409	5.01263	23.556	12.7905	3.52939	1	0	0	0	0	0		0	0	0	0	0	0	0
10287	ENSG00000158195	0.00455268	0.0016588	53.0084	53.0084	KO up vs OCT4	6.04589	464.761	3.95088	8.39978	84.7523	65.5838	1	0	0	0	0	0		0	0	0	0	0	0	0
10292	ENSG00000158258	1.20687e-05	6.33292e-06	3.33684	3.33684	KO up vs OCT4	2.33173	4.77522	7.26334	30.6177	8.41941	1.7874	1	0	0	0	0	0		0	0	0	0	0	0	0
10306	ENSG00000158417	0.0237093	0.0124803	40.2128	40.2128	KO up vs OCT4	2.5582	632.112	2.89697	5.05915	82.1898	105.597	1	0	0	0	0	0		0	0	0	0	0	0	0
10312	ENSG00000158457	0.00774327	0.00226708	723.584	723.584	KO up vs OCT4	16.8959	30988.2	3.78594	7.23075	218.491	196.41	1	0	0	0	0	0		0	0	0	0	0	0	0
10331	ENSG00000158545	0.00184692	0.00155178	6.77655	6.77655	KO up vs OCT4	2.40236	19.1152	3.98624	10.6183	24.4433	14.963	1	0	0	0	0	0		0	0	0	0	0	0	0
10341	ENSG00000158636	0.00151879	0.000656359	5.47474	5.47474	KO up vs OCT4	2.39767	12.5008	4.44855	11.1412	16.2577	9.48501	1	0	0	0	0	0		0	0	0	0	0	0	0
10345	ENSG00000158691	0.0251785	0.0110983	3.06345	3.06345	KO up vs OCT4	1.35244	6.93913	2.95808	4.95273	7.08757	9.30179	1	0	0	0	0	0		0	0	0	0	0	0	0
10346	ENSG00000158710	0.00363269	0.00286585	23464.9	23464.9	KO up vs OCT4	62.0525	8873150	3.6629	8.92634	673.117	490.151	1	0	0	0	0	0		0	0	0	0	0	0	0
10361	ENSG00000158796	0.00874794	0.00512582	13.8392	13.8392	KO up vs OCT4	2.55455	74.9738	3.35954	6.97545	42.6276	39.7221	1	0	0	0	0	0		0	0	0	0	0	0	0
10369	ENSG00000158850	0.0318455	0.0100204	3.11049	3.11049	KO up vs OCT4	1.37801	7.02108	3.01122	4.54622	6.45031	9.22239	1	0	0	0	0	0		0	0	0	0	0	0	0
10410	ENSG00000159200	0.00358191	0.0010736	2.24271	2.24271	KO up vs OCT4	1.47774	3.40366	4.18272	8.95978	3.33775	2.42142	1	0	0	0	0	0		0	0	0	0	0	0	0
10428	ENSG00000159263	0.00837593	0.00278092	6.20712	6.20712	KO up vs OCT4	2.12447	18.1356	3.67867	7.06584	17.3873	15.9949	1	0	0	0	0	0		0	0	0	0	0	0	0
10434	ENSG00000159335	0.00046363	0.000227211	5.11842e+33	5.11842e+33	KO up vs OCT4	1.79507e+19	1.45945e+48	5.03797	14.6744	34798.8	15414.1	1	0	0	0	0	0		0	0	0	0	0	0	0
10462	ENSG00000159579	0.000536503	0.000146222	238.034	238.034	KO up vs OCT4	25.4777	2223.92	5.2906	14.2041	151.828	69.4788	1	0	0	0	0	0		0	0	0	0	0	0	0
10472	ENSG00000159658	0.00139527	0.0028121	7.30242	7.30242	KO up vs OCT4	2.26763	23.5159	3.67282	11.373	33.2956	19.0294	1	0	0	0	0	0		0	0	0	0	0	0	0
10479	ENSG00000159714	0.000802564	0.000286184	2.00867	2.00867	KO up vs OCT4	1.47763	2.73056	4.90763	12.9602	2.61525	1.31164	1	0	0	0	0	0		0	0	0	0	0	0	0
10537	ENSG00000160194	0.00307603	0.00290158	6.57204	6.57204	KO up vs OCT4	2.16056	19.9909	3.65641	9.32619	24.7061	17.2192	1	0	0	0	0	0		0	0	0	0	0	0	0
10561	ENSG00000160284	0.0238904	0.00833313	6.80915	6.80915	KO up vs OCT4	1.79404	25.8437	3.10704	5.04562	19.2146	24.7531	1	0	0	0	0	0		0	0	0	0	0	0	0
10566	ENSG00000160299	0.0018756	0.000582744	7.80555	7.80555	KO up vs OCT4	2.91915	20.8714	4.51348	10.5777	21.9035	13.4597	1	0	0	0	0	0		0	0	0	0	0	0	0
10606	ENSG00000160633	0.00128148	0.000557068	2437.57	2437.57	KO up vs OCT4	59.5122	99840.5	4.53814	11.6084	342.499	191.778	1	0	0	0	0	0		0	0	0	0	0	0	0
10609	ENSG00000160679	0.00913795	0.0026385	66.2214	66.2214	KO up vs OCT4	5.74826	762.887	3.70623	6.88532	88.0439	83.1167	1	0	0	0	0	0		0	0	0	0	0	0	0
10620	ENSG00000160741	0.00334978	0.00490076	4.17266	4.17266	KO up vs OCT4	1.67575	10.39	3.3829	9.11996	16.2479	11.5803	1	0	0	0	0	0		0	0	0	0	0	0	0
10632	ENSG00000160799	0.0045783	0.00181987	11.6091	11.6091	KO up vs OCT4	2.98703	45.1188	3.90183	8.38692	33.0844	25.6409	1	0	0	0	0	0		0	0	0	0	0	0	0
10634	ENSG00000160803	4.04356e-05	1.60599e-05	2899.36	2899.36	KO up vs OCT4	216.908	38755	6.64269	24.3174	349.929	93.5355	1	0	0	0	0	0		0	0	0	0	0	0	0
10693	ENSG00000161265	0.00193574	0.00069125	3.28699	3.28699	KO up vs OCT4	1.83748	5.87994	4.42037	10.495	7.59852	4.70608	1	0	0	0	0	0		0	0	0	0	0	0	0
10706	ENSG00000161526	0.00916785	0.00370379	5.41805	5.41805	KO up vs OCT4	1.92565	15.2444	3.5288	6.8786	15.757	14.8897	1	0	0	0	0	0		0	0	0	0	0	0	0
10709	ENSG00000161544	1.8943e-06	6.811e-07	5.63465	5.63465	KO up vs OCT4	3.70384	8.57197	8.90244	42.8521	16.1474	2.4493	1	0	0	0	0	0		0	0	0	0	0	0	0
10733	ENSG00000161671	0.00403656	0.00114565	868.506	868.506	KO up vs OCT4	25.5959	29469.7	4.14793	8.67817	230.738	172.824	1	0	0	0	0	0		0	0	0	0	0	0	0
10755	ENSG00000161914	0.000603893	0.000155067	2.34793	2.34793	KO up vs OCT4	1.65326	3.33449	5.25665	13.8306	3.64298	1.7121	1	0	0	0	0	0		0	0	0	0	0	0	0
10766	ENSG00000161970	0.0205032	0.00656654	2.44391e+75	2.44391e+75	KO up vs OCT4	9.49648e+24	6.28939e+125	3.23079	5.32043	153446	187466	1	0	0	0	0	0		0	0	0	0	0	0	0
10772	ENSG00000161999	0.00219439	0.00274787	20.7194	20.7194	KO up vs OCT4	3.50448	122.498	3.68493	10.1702	68.747	43.9376	1	0	0	0	0	0		0	0	0	0	0	0	0
10781	ENSG00000162065	1.19421e-06	3.27238e-07	2.50354	2.50354	KO up vs OCT4	2.03175	3.08488	9.49474	46.4824	4.33828	0.606656	1	0	0	0	0	0		0	0	0	0	0	0	0
10797	ENSG00000162191	0.000828529	0.000244889	132704000	132704000	KO up vs OCT4	40742.2	432236000000	4.99551	12.8651	1801.75	910.323	1	0	0	0	0	0		0	0	0	0	0	0	0
10799	ENSG00000162222	0.00258504	0.000743049	24.4017	24.4017	KO up vs OCT4	5.04979	117.914	4.38113	9.75531	51.8209	34.5285	1	0	0	0	0	0		0	0	0	0	0	0	0
10801	ENSG00000162231	0.00164016	0.000433447	9.86812	9.86812	KO up vs OCT4	3.42695	28.4159	4.67622	10.9338	26.1806	15.564	1	0	0	0	0	0		0	0	0	0	0	0	0
10808	ENSG00000162300	0.00363787	0.00131027	16.047	16.047	KO up vs OCT4	3.6859	69.8626	4.07622	8.92296	41.3307	30.1077	1	0	0	0	0	0		0	0	0	0	0	0	0
10816	ENSG00000162368	0.0171686	0.00524802	117.772	117.772	KO up vs OCT4	5.42467	2556.9	3.34729	5.64766	114.52	131.804	1	0	0	0	0	0		0	0	0	0	0	0	0
10822	ENSG00000162384	0.0103642	0.0037383	6.17915	6.17915	KO up vs OCT4	2.02325	18.8716	3.52396	6.62852	17.6868	17.3439	1	0	0	0	0	0		0	0	0	0	0	0	0
10863	ENSG00000162545	0.00174497	0.000482887	2.24314	2.24314	KO up vs OCT4	1.53699	3.27371	4.61663	10.7685	3.29445	1.98858	1	0	0	0	0	0		0	0	0	0	0	0	0
10878	ENSG00000162604	0.0237965	0.00988942	2.05573	2.05573	KO up vs OCT4	1.22727	3.44343	3.01806	5.05262	2.87791	3.70232	1	0	0	0	0	0		0	0	0	0	0	0	0
10899	ENSG00000162664	0.0156934	0.00531284	4.60923	4.60923	KO up vs OCT4	1.71592	12.3811	3.3409	5.81673	12.1569	13.5849	1	0	0	0	0	0		0	0	0	0	0	0	0
10923	ENSG00000162736	0.0036531	0.0010837	126.155	126.155	KO up vs OCT4	10.3392	1539.31	4.1777	8.91304	119.395	87.0712	1	0	0	0	0	0		0	0	0	0	0	0	0
10955	ENSG00000162873	0.0130405	0.00848215	2.03534	2.03534	KO up vs OCT4	1.23994	3.34097	3.09783	6.17267	3.24544	3.41754	1	0	0	0	0	0		0	0	0	0	0	0	0
10978	ENSG00000162946	0.000953489	0.000276599	3.3273	3.3273	KO up vs OCT4	1.96407	5.6367	4.92679	12.4511	7.40616	3.86633	1	0	0	0	0	0		0	0	0	0	0	0	0
10996	ENSG00000163001	0.0139741	0.00466886	19.5325	19.5325	KO up vs OCT4	2.96868	128.515	3.40813	6.03857	45.8791	49.3849	1	0	0	0	0	0		0	0	0	0	0	0	0
11003	ENSG00000163017	0.00117642	0.0003644	17125300	17125300	KO up vs OCT4	9102.77	32218300000	4.77248	11.8483	1441.79	790.97	1	0	0	0	0	0		0	0	0	0	0	0	0
11005	ENSG00000163029	0.00110258	0.000292044	185714	185714	KO up vs OCT4	879.17	39229900	4.89624	12.0322	738.027	398.694	1	0	0	0	0	0		0	0	0	0	0	0	0
11013	ENSG00000163064	0.000995659	0.000351572	3.30546	3.30546	KO up vs OCT4	1.92828	5.66623	4.79245	12.3253	7.66351	4.0415	1	0	0	0	0	0		0	0	0	0	0	0	0
11022	ENSG00000163092	0.00190112	0.000679019	2.21663	2.21663	KO up vs OCT4	1.50353	3.26793	4.43008	10.5423	3.40027	2.09649	1	0	0	0	0	0		0	0	0	0	0	0	0
11028	ENSG00000163113	0.00110946	0.000294888	2.61723	2.61723	KO up vs OCT4	1.71109	4.00324	4.8908	12.0145	4.64506	2.51304	1	0	0	0	0	0		0	0	0	0	0	0	0
11041	ENSG00000163156	0.00759449	0.00311087	10.7377	10.7377	KO up vs OCT4	2.60417	44.2742	3.61996	7.27179	31.2391	27.9235	1	0	0	0	0	0		0	0	0	0	0	0	0
11043	ENSG00000163159	0.00256933	0.00280955	65.745	65.745	KO up vs OCT4	5.60696	770.899	3.6733	9.77056	126.751	84.3227	1	0	0	0	0	0		0	0	0	0	0	0	0
11049	ENSG00000163191	0.000182751	5.28852e-05	1.07304e+51	1.07304e+51	KO up vs OCT4	2.11747e+32	5.43767e+69	5.89394	17.935	71215.2	25809.8	1	0	0	0	0	0		0	0	0	0	0	0	0
11054	ENSG00000163214	0.022223	0.0077114	7.53888	7.53888	KO up vs OCT4	1.88412	30.1651	3.14731	5.17486	21.2982	26.7521	1	0	0	0	0	0		0	0	0	0	0	0	0
11095	ENSG00000163374	0.00221291	0.000647212	13.0648	13.0648	KO up vs OCT4	3.7585	45.4138	4.4562	10.1487	33.7217	21.598	1	0	0	0	0	0		0	0	0	0	0	0	0
11105	ENSG00000163395	0.000350711	0.000153391	3.62113	3.62113	KO up vs OCT4	2.13523	6.14107	5.26292	15.6034	9.31901	3.88207	1	0	0	0	0	0		0	0	0	0	0	0	0
11118	ENSG00000163453	0.00505204	0.00564599	62.1052	62.1052	KO up vs OCT4	4.19311	919.855	3.30928	8.16311	126.95	101.086	1	0	0	0	0	0		0	0	0	0	0	0	0
11125	ENSG00000163472	6.01724e-07	1.47968e-07	2.30713	2.30713	KO up vs OCT4	1.93172	2.7555	10.1697	52.3748	3.53604	0.438843	1	0	0	0	0	0		0	0	0	0	0	0	0
11127	ENSG00000163481	0.0183017	0.00603487	13.1344	13.1344	KO up vs OCT4	2.40198	71.8206	3.27466	5.5288	34.1602	40.1609	1	0	0	0	0	0		0	0	0	0	0	0	0
11128	ENSG00000163482	0.00833212	0.00240209	2.96723	2.96723	KO up vs OCT4	1.5872	5.54717	3.75553	7.07679	5.92989	5.44658	1	0	0	0	0	0		0	0	0	0	0	0	0
11193	ENSG00000163635	0.00958727	0.00282331	2.50271	2.50271	KO up vs OCT4	1.45858	4.29428	3.67074	6.78684	4.23491	4.05592	1	0	0	0	0	0		0	0	0	0	0	0	0
11237	ENSG00000163781	0.00535144	0.00168665	589.457	589.457	KO up vs OCT4	17.8714	19442.2	3.94206	8.03381	210.184	170.056	1	0	0	0	0	0		0	0	0	0	0	0	0
11238	ENSG00000163785	0.014524	0.00466575	18.8214	18.8214	KO up vs OCT4	2.92919	120.936	3.40847	5.96434	44.1822	48.1502	1	0	0	0	0	0		0	0	0	0	0	0	0
11239	ENSG00000163788	0.00803581	0.00249943	23.8178	23.8178	KO up vs OCT4	3.8055	149.07	3.73466	7.15264	51.4982	46.7993	1	0	0	0	0	0		0	0	0	0	0	0	0
11248	ENSG00000163808	0.0306821	0.00989935	647.738	647.738	KO up vs OCT4	6.28943	66709.5	3.01754	4.60965	211.948	298.865	1	0	0	0	0	0		0	0	0	0	0	0	0
11353	ENSG00000164099	0.000956299	0.00121747	29.5651	29.5651	KO up vs OCT4	4.99691	174.928	4.11542	12.4425	84.1776	43.9746	1	0	0	0	0	0		0	0	0	0	0	0	0
11356	ENSG00000164105	0.0092993	0.00272327	96.3759	96.3759	KO up vs OCT4	6.64221	1398.38	3.68965	6.84933	104.898	99.5484	1	0	0	0	0	0		0	0	0	0	0	0	0
11378	ENSG00000164151	0.00624384	0.00338757	364.26	364.26	KO up vs OCT4	10.3212	12855.7	3.57541	7.69301	209.135	176.703	1	0	0	0	0	0		0	0	0	0	0	0	0
11387	ENSG00000164172	9.90933e-05	2.82848e-05	7.85136	7.85136	KO up vs OCT4	3.86481	15.95	6.28104	20.3477	21.8809	6.98979	1	0	0	0	0	0		0	0	0	0	0	0	0
11396	ENSG00000164190	0.00329593	0.000932194	99.9078	99.9078	KO up vs OCT4	9.66519	1032.73	4.25859	9.15896	106.96	75.9081	1	0	0	0	0	0		0	0	0	0	0	0	0
11403	ENSG00000164221	0.0136937	0.00702261	13.6435	13.6435	KO up vs OCT4	2.33206	79.8199	3.19591	6.07774	40.5984	43.419	1	0	0	0	0	0		0	0	0	0	0	0	0
11409	ENSG00000164252	0.0059584	0.00178753	86.4553	86.4553	KO up vs OCT4	7.36252	1015.21	3.91131	7.79556	101.249	84.4222	1	0	0	0	0	0		0	0	0	0	0	0	0
11421	ENSG00000164294	6.68713e-05	2.06018e-05	582443000	582443000	KO up vs OCT4	698192	485884000000	6.48215	22.0223	2132.92	629.543	1	0	0	0	0	0		0	0	0	0	0	0	0
11422	ENSG00000164296	0.000332821	8.73152e-05	2.4931	2.4931	KO up vs OCT4	1.75181	3.54808	5.59272	15.7822	4.20682	1.73261	1	0	0	0	0	0		0	0	0	0	0	0	0
11445	ENSG00000164346	0.00100509	0.000270626	1.7488e+16	1.7488e+16	KO up vs OCT4	1374450000	2.22512e+23	4.93909	12.298	7045.03	3723.57	1	0	0	0	0	0		0	0	0	0	0	0	0
11493	ENSG00000164576	0.0248401	0.00799891	2.10446	2.10446	KO up vs OCT4	1.25888	3.51802	3.1283	4.97659	2.81268	3.67368	1	0	0	0	0	0		0	0	0	0	0	0	0
11541	ENSG00000164743	0.00595249	0.00166434	4.90794	4.90794	KO up vs OCT4	2.05561	11.7181	3.94911	7.79774	12.6422	10.5382	1	0	0	0	0	0		0	0	0	0	0	0	0
11568	ENSG00000164850	7.38066e-06	1.75901e-06	2.25016	2.25016	KO up vs OCT4	1.81616	2.78786	8.17671	33.5348	3.29587	0.638833	1	0	0	0	0	0		0	0	0	0	0	0	0
11576	ENSG00000164885	0.00115369	0.000345745	6.30695	6.30695	KO up vs OCT4	2.75405	14.4433	4.80177	11.9035	17.4935	9.55249	1	0	0	0	0	0		0	0	0	0	0	0	0
11580	ENSG00000164897	0.00390997	0.00180521	13.1222	13.1222	KO up vs OCT4	3.15984	54.4942	3.9061	8.75275	37.9812	28.2057	1	0	0	0	0	0		0	0	0	0	0	0	0
11606	ENSG00000164975	0.0158181	0.00468556	9.92706	9.92706	KO up vs OCT4	2.31528	42.5635	3.40627	5.80174	26.3182	29.4857	1	0	0	0	0	0		0	0	0	0	0	0	0
11612	ENSG00000165006	0.00176431	0.00143791	36.1893	36.1893	KO up vs OCT4	5.27704	248.182	4.02673	10.7392	85.2212	51.5809	1	0	0	0	0	0		0	0	0	0	0	0	0
11640	ENSG00000165124	0.000442152	0.000148662	4.18671	4.18671	KO up vs OCT4	2.33064	7.5209	5.28102	14.8294	10.8922	4.77422	1	0	0	0	0	0		0	0	0	0	0	0	0
11666	ENSG00000165219	0.00166542	0.00044246	5.31536	5.31536	KO up vs OCT4	2.45203	11.5223	4.66485	10.8929	13.9573	8.32863	1	0	0	0	0	0		0	0	0	0	0	0	0
11718	ENSG00000165480	0.0336697	0.0133211	370.355	370.355	KO up vs OCT4	4.26949	32126.4	2.86299	4.45196	189.816	277.138	1	0	0	0	0	0		0	0	0	0	0	0	0
11721	ENSG00000165494	0.00139418	0.000373707	509.048	509.048	KO up vs OCT4	30.0519	8622.74	4.75845	11.3751	194.96	111.405	1	0	0	0	0	0		0	0	0	0	0	0	0
11725	ENSG00000165502	0.0176468	0.00898887	5.55491e+39	5.55491e+39	KO up vs OCT4	568961000000	5.42339e+67	3.06768	5.59642	49758.8	57792.6	1	0	0	0	0	0		0	0	0	0	0	0	0
11733	ENSG00000165525	0.00314561	0.00114578	46.4404	46.4404	KO up vs OCT4	6.2909	342.83	4.14787	9.27182	79.3148	55.6035	1	0	0	0	0	0		0	0	0	0	0	0	0
11756	ENSG00000165632	0.00577952	0.00289261	3.54491	3.54491	KO up vs OCT4	1.67888	7.48501	3.65803	7.86275	9.40163	7.77216	1	0	0	0	0	0		0	0	0	0	0	0	0
11800	ENSG00000165802	0.0214805	0.00663532	10.1108	10.1108	KO up vs OCT4	2.14673	47.6204	3.22538	5.23605	26.916	33.4133	1	0	0	0	0	0		0	0	0	0	0	0	0
11851	ENSG00000166004	0.00216229	0.000578194	102.562	102.562	KO up vs OCT4	11.2033	938.925	4.51777	10.2081	107.137	68.2192	1	0	0	0	0	0		0	0	0	0	0	0	0
11860	ENSG00000166033	0.00435644	0.00132856	398.557	398.557	KO up vs OCT4	16.5862	9577.1	4.06883	8.50112	183.937	140.639	1	0	0	0	0	0		0	0	0	0	0	0	0
11900	ENSG00000166173	0.00449831	0.00126389	4.06693	4.06693	KO up vs OCT4	1.94033	8.5243	4.09544	8.42735	9.8793	7.61989	1	0	0	0	0	0		0	0	0	0	0	0	0
11903	ENSG00000166188	0.00239475	0.000748142	2.06173	2.06173	KO up vs OCT4	1.44262	2.94655	4.37743	9.94766	2.71523	1.77419	1	0	0	0	0	0		0	0	0	0	0	0	0
11907	ENSG00000166199	0.0293734	0.0121787	4.05738	4.05738	KO up vs OCT4	1.43431	11.4776	2.90971	4.6844	10.8426	15.0451	1	0	0	0	0	0		0	0	0	0	0	0	0
11912	ENSG00000166224	0.000640039	0.000752822	23.6683	23.6683	KO up vs OCT4	4.95973	112.947	4.37405	13.6496	71.3597	33.9818	1	0	0	0	0	0		0	0	0	0	0	0	0
11915	ENSG00000166228	0.000249512	8.16013e-05	302.046	302.046	KO up vs OCT4	33.7991	2699.24	5.63294	16.792	172.418	66.7412	1	0	0	0	0	0		0	0	0	0	0	0	0
11924	ENSG00000166265	0.000656542	0.000351899	6.58964	6.58964	KO up vs OCT4	2.81637	15.4182	4.79193	13.5708	20.9908	10.0539	1	0	0	0	0	0		0	0	0	0	0	0	0
11941	ENSG00000166337	0.00352333	0.00167577	34.199	34.199	KO up vs OCT4	4.94375	236.576	3.94548	8.99905	72.0571	52.0467	1	0	0	0	0	0		0	0	0	0	0	0	0
11984	ENSG00000166477	0.00510673	0.00196196	220656	220656	KO up vs OCT4	226.244	215206000	3.86211	8.13884	825.317	659.131	1	0	0	0	0	0		0	0	0	0	0	0	0
11989	ENSG00000166484	5.9431e-05	2.15493e-05	9.19304	9.19304	KO up vs OCT4	4.37449	19.3193	6.45341	22.5446	26.6166	7.67403	1	0	0	0	0	0		0	0	0	0	0	0	0
12013	ENSG00000166579	0.000323563	9.82006e-05	7.849	7.849	KO up vs OCT4	3.50602	17.5717	5.52322	15.8791	22.0764	9.03683	1	0	0	0	0	0		0	0	0	0	0	0	0
12036	ENSG00000166716	0.016037	0.00489495	3.71332	3.71332	KO up vs OCT4	1.60683	8.58132	3.38352	5.77575	8.67523	9.76305	1	0	0	0	0	0		0	0	0	0	0	0	0
12037	ENSG00000166734	0.000214056	6.59663e-05	398.474	398.474	KO up vs OCT4	42.1814	3764.25	5.76022	17.3478	187.269	70.1677	1	0	0	0	0	0		0	0	0	0	0	0	0
12047	ENSG00000166780	0.00543814	0.00155493	54.7372	54.7372	KO up vs OCT4	6.25108	479.303	3.98517	7.99792	80.6022	65.5063	1	0	0	0	0	0		0	0	0	0	0	0	0
12052	ENSG00000166794	0.00372615	0.00113066	613862000000000	613862000000000	KO up vs OCT4	12561800	2.99977e+22	4.15498	8.86617	5949	4361.35	1	0	0	0	0	0		0	0	0	0	0	0	0
12086	ENSG00000166889	0.019719	0.00961563	5.76475	5.76475	KO up vs OCT4	1.6551	20.0788	3.03265	5.39156	17.9726	21.6675	1	0	0	0	0	0		0	0	0	0	0	0	0
12092	ENSG00000166912	0.0137834	0.00410067	2.36431	2.36431	KO up vs OCT4	1.38492	4.0363	3.47572	6.06511	3.71387	3.98017	1	0	0	0	0	0		0	0	0	0	0	0	0
12147	ENSG00000167114	0.00673545	0.00190564	4.19196	4.19196	KO up vs OCT4	1.8864	9.31538	3.87749	7.52849	10.2752	8.87149	1	0	0	0	0	0		0	0	0	0	0	0	0
12149	ENSG00000167118	0.00704792	0.00199402	8.68901	8.68901	KO up vs OCT4	2.58564	29.1993	3.85356	7.43096	23.3693	20.4416	1	0	0	0	0	0		0	0	0	0	0	0	0
12177	ENSG00000167257	0.000559474	0.000176983	19.3483	19.3483	KO up vs OCT4	5.62462	66.5566	5.18055	14.071	45.9737	21.2372	1	0	0	0	0	0		0	0	0	0	0	0	0
12216	ENSG00000167460	0.000890366	0.000419946	2591840000000000	2591840000000000	KO up vs OCT4	208562000	3.22093e+22	4.69373	12.6518	7226.83	3712.85	1	0	0	0	0	0		0	0	0	0	0	0	0
12217	ENSG00000167461	0.00745607	0.00367716	138.538	138.538	KO up vs OCT4	6.79012	2826.59	3.53257	7.31082	142.322	126.537	1	0	0	0	0	0		0	0	0	0	0	0	0
12223	ENSG00000167491	0.00221485	0.00108737	689.274	689.274	KO up vs OCT4	23.4405	20268.3	4.17589	10.1465	248.304	159.068	1	0	0	0	0	0		0	0	0	0	0	0	0
12225	ENSG00000167508	0.0203618	0.00620268	3.27514	3.27514	KO up vs OCT4	1.49223	7.18828	3.26041	5.33302	7.05428	8.59791	1	0	0	0	0	0		0	0	0	0	0	0	0
12235	ENSG00000167535	0.0228046	0.00711956	2.55598	2.55598	KO up vs OCT4	1.35345	4.82694	3.18879	5.12854	4.43751	5.62418	1	0	0	0	0	0		0	0	0	0	0	0	0
12278	ENSG00000167658	0.032721	0.0104465	2.27983e+23	2.27983e+23	KO up vs OCT4	3010260	1.72665e+40	2.98956	4.50022	14551.5	21017.8	1	0	0	0	0	0		0	0	0	0	0	0	0
12342	ENSG00000167874	0.0190527	0.00586819	85.7417	85.7417	KO up vs OCT4	4.6075	1595.58	3.28922	5.45461	99.8045	118.932	1	0	0	0	0	0		0	0	0	0	0	0	0
12366	ENSG00000167972	0.000903276	0.000241611	2.43207	2.43207	KO up vs OCT4	1.65695	3.56978	5.00314	12.6095	3.97515	2.04913	1	0	0	0	0	0		0	0	0	0	0	0	0
12375	ENSG00000167994	0.000710668	0.000411472	2.00847	2.00847	KO up vs OCT4	1.45815	2.7665	4.70502	13.3277	2.9252	1.42664	1	0	0	0	0	0		0	0	0	0	0	0	0
12401	ENSG00000168077	0.00943166	0.00289211	8.42514	8.42514	KO up vs OCT4	2.3931	29.6615	3.65812	6.82034	23.1279	22.0416	1	0	0	0	0	0		0	0	0	0	0	0	0
12423	ENSG00000168159	0.00712045	0.00223516	98.2186	98.2186	KO up vs OCT4	7.20488	1338.94	3.79341	7.40903	108.24	94.9598	1	0	0	0	0	0		0	0	0	0	0	0	0
12425	ENSG00000168175	0.0174329	0.00610483	154.543	154.543	KO up vs OCT4	5.52381	4323.76	3.26867	5.61914	133.493	154.42	1	0	0	0	0	0		0	0	0	0	0	0	0
12478	ENSG00000168398	0.00177356	0.00108341	2.02265	2.02265	KO up vs OCT4	1.40517	2.91148	4.17784	10.7253	3.04614	1.84608	1	0	0	0	0	0		0	0	0	0	0	0	0
12486	ENSG00000168434	0.00407794	0.00162972	2.20483	2.20483	KO up vs OCT4	1.43238	3.39383	3.96025	8.65437	3.44627	2.58838	1	0	0	0	0	0		0	0	0	0	0	0	0
12518	ENSG00000168566	0.0356623	0.0135784	24.6446	24.6446	KO up vs OCT4	2.17709	278.976	2.85301	4.35551	54.8983	81.9282	1	0	0	0	0	0		0	0	0	0	0	0	0
12534	ENSG00000168646	2.67828e-05	0.00038287	2.55856	2.55856	KO up vs OCT4	1.66816	3.92423	4.74499	26.3337	10.3128	2.54552	1	0	0	0	0	0		0	0	0	0	0	0	0
12540	ENSG00000168675	3.23086e-07	1.30569e-07	5.04359	5.04359	KO up vs OCT4	3.58962	7.08649	10.2794	58.2858	14.4291	1.60913	1	0	0	0	0	0		0	0	0	0	0	0	0
12560	ENSG00000168778	0.00705276	0.00204078	2.98739	2.98739	KO up vs OCT4	1.61431	5.52835	3.84134	7.42948	6.0247	5.27097	1	0	0	0	0	0		0	0	0	0	0	0	0
12573	ENSG00000168818	0.0100126	0.0030864	7.05225	7.05225	KO up vs OCT4	2.20104	22.5958	3.62409	6.6984	19.4412	18.8654	1	0	0	0	0	0		0	0	0	0	0	0	0
12575	ENSG00000168826	0.000272061	0.000129496	3.8614	3.8614	KO up vs OCT4	2.24029	6.65558	5.36112	16.484	10.4586	4.12405	1	0	0	0	0	0		0	0	0	0	0	0	0
12581	ENSG00000168872	0.0193781	0.0067531	3.40564	3.40564	KO up vs OCT4	1.49526	7.75674	3.21624	5.42351	7.86596	9.42725	1	0	0	0	0	0		0	0	0	0	0	0	0
12597	ENSG00000168916	0.000741648	0.000406631	3169.67	3169.67	KO up vs OCT4	78.6533	127735	4.71158	13.198	385.997	190.104	1	0	0	0	0	0		0	0	0	0	0	0	0
12630	ENSG00000169045	0.0116005	0.0053733	9.5377e+19	9.5377e+19	KO up vs OCT4	10891800	8.35196e+32	3.33502	6.40286	12172.1	12356.8	1	0	0	0	0	0		0	0	0	0	0	0	0
12652	ENSG00000169136	3.43151e-05	1.44888e-05	18.8738	18.8738	KO up vs OCT4	7.32933	48.6023	6.70972	25.1054	48.0825	12.4489	1	0	0	0	0	0		0	0	0	0	0	0	0
12662	ENSG00000169188	0.00194645	0.00124546	5.10753	5.10753	KO up vs OCT4	2.16441	12.0526	4.10328	10.4806	16.5375	10.2564	1	0	0	0	0	0		0	0	0	0	0	0	0
12720	ENSG00000169410	0.00137984	0.00138633	4.91148	4.91148	KO up vs OCT4	2.09968	11.4887	4.04616	11.4036	17.6278	10.0478	1	0	0	0	0	0		0	0	0	0	0	0	0
12789	ENSG00000169738	0.000401074	0.000128194	2965.27	2965.27	KO up vs OCT4	118.703	74074.5	5.367	15.1518	335.891	144.095	1	0	0	0	0	0		0	0	0	0	0	0	0
12826	ENSG00000169895	0.0199136	0.0074847	39.5791	39.5791	KO up vs OCT4	3.20858	488.224	3.16281	5.3736	72.6111	87.8317	1	0	0	0	0	0		0	0	0	0	0	0	0
12837	ENSG00000169925	0.0304315	0.00949147	5.79664	5.79664	KO up vs OCT4	1.66234	20.213	3.03941	4.62367	15.4412	21.7074	1	0	0	0	0	0		0	0	0	0	0	0	0
12843	ENSG00000169955	7.49411e-05	2.12062e-05	2.90149	2.90149	KO up vs OCT4	2.03234	4.14232	6.46366	21.5267	5.84106	1.76371	1	0	0	0	0	0		0	0	0	0	0	0	0
12862	ENSG00000170043	0.00182106	0.0017086	8966.47	8966.47	KO up vs OCT4	60.6307	1326020	3.93521	10.6554	569.414	347.352	1	0	0	0	0	0		0	0	0	0	0	0	0
12919	ENSG00000170296	0.0327891	0.0102606	149.052	149.052	KO up vs OCT4	4.05223	5482.56	2.9989	4.49671	125.097	180.828	1	0	0	0	0	0		0	0	0	0	0	0	0
12930	ENSG00000170348	0.022889	0.00696174	34993.9	34993.9	KO up vs OCT4	29.9704	40859500	3.20044	5.12193	546.906	694.052	1	0	0	0	0	0		0	0	0	0	0	0	0
12932	ENSG00000170364	0.000502428	0.000132412	24.7125	24.7125	KO up vs OCT4	6.76477	90.2774	5.34816	14.4142	51.7908	23.3548	1	0	0	0	0	0		0	0	0	0	0	0	0
12965	ENSG00000170471	0.00114007	0.00427973	3.54936	3.54936	KO up vs OCT4	1.60692	7.83983	3.45344	11.9371	16.0464	8.7376	1	0	0	0	0	0		0	0	0	0	0	0	0
13019	ENSG00000170689	0.0334372	0.0113032	13.9234	13.9234	KO up vs OCT4	2.0218	95.8858	2.94855	4.46364	35.5756	51.8055	1	0	0	0	0	0		0	0	0	0	0	0	0
13022	ENSG00000170734	0.00566967	0.00158784	4.64236	4.64236	KO up vs OCT4	2.01506	10.6952	3.97405	7.90522	11.7864	9.69123	1	0	0	0	0	0		0	0	0	0	0	0	0
13036	ENSG00000170801	0.0332522	0.0105116	2.0219	2.0219	KO up vs OCT4	1.21497	3.36473	2.98633	4.47301	2.48372	3.60925	1	0	0	0	0	0		0	0	0	0	0	0	0
13061	ENSG00000170891	0.0279512	0.00875667	5.77545	5.77545	KO up vs OCT4	1.68895	19.7494	3.08128	4.77012	15.4357	21.0334	1	0	0	0	0	0		0	0	0	0	0	0	0
13070	ENSG00000170919	0.00508375	0.00183079	2.09364	2.09364	KO up vs OCT4	1.39021	3.15301	3.89866	8.149	2.92443	2.33266	1	0	0	0	0	0		0	0	0	0	0	0	0
13087	ENSG00000170961	0.000995476	0.000322133	73.1254	73.1254	KO up vs OCT4	10.7708	496.465	4.84128	12.3259	96.7926	51.0433	1	0	0	0	0	0		0	0	0	0	0	0	0
13093	ENSG00000171004	0.000374734	9.86377e-05	3773.07	3773.07	KO up vs OCT4	150.325	94701.8	5.5206	15.3793	341.939	144.519	1	0	0	0	0	0		0	0	0	0	0	0	0
13107	ENSG00000171067	0.00180368	0.00126599	54.4688	54.4688	KO up vs OCT4	6.60879	448.925	4.09456	10.6808	101.715	61.9006	1	0	0	0	0	0		0	0	0	0	0	0	0
13129	ENSG00000171148	0.00361651	0.00134154	67.846	67.846	KO up vs OCT4	7.2082	638.589	4.06365	8.93693	96.1617	69.9402	1	0	0	0	0	0		0	0	0	0	0	0	0
13145	ENSG00000171206	0.00129518	0.000423799	60.0243	60.0243	KO up vs OCT4	9.09787	396.018	4.68867	11.5788	88.2286	49.5288	1	0	0	0	0	0		0	0	0	0	0	0	0
13206	ENSG00000171475	0.00880588	0.00514724	2.23501	2.23501	KO up vs OCT4	1.33208	3.75	3.35737	6.96177	3.99108	3.72635	1	0	0	0	0	0		0	0	0	0	0	0	0
13215	ENSG00000171490	0.00233233	0.000624993	281894000	281894000	KO up vs OCT4	23491.7	3382650000000	4.47525	10.0146	1891.23	1227.5	1	0	0	0	0	0		0	0	0	0	0	0	0
13250	ENSG00000171621	0.00013922	0.000116365	3.39317	3.39317	KO up vs OCT4	2.08568	5.52031	5.42352	18.9795	9.62248	3.29547	1	0	0	0	0	0		0	0	0	0	0	0	0
13270	ENSG00000171729	3.48649e-06	3.00333e-06	30.727	30.727	KO up vs OCT4	11.8797	79.4759	7.78645	38.431	74.2933	12.5656	1	0	0	0	0	0		0	0	0	0	0	0	0
13296	ENSG00000171824	0.0084233	0.00500913	77.1597	77.1597	KO up vs OCT4	4.76439	1249.61	3.37152	7.05408	117.094	107.896	1	0	0	0	0	0		0	0	0	0	0	0	0
13297	ENSG00000171827	0.00297363	0.000806462	3.42181	3.42181	KO up vs OCT4	1.85403	6.31532	4.33678	9.40884	7.56347	5.22515	1	0	0	0	0	0		0	0	0	0	0	0	0
13325	ENSG00000171943	0.0236515	0.00780959	3.12952	3.12952	KO up vs OCT4	1.42778	6.85952	3.14074	5.06349	6.67506	8.56878	1	0	0	0	0	0		0	0	0	0	0	0	0
13340	ENSG00000172000	0.0347499	0.010947	2.3033	2.3033	KO up vs OCT4	1.25416	4.23006	2.96522	4.39888	3.47942	5.14136	1	0	0	0	0	0		0	0	0	0	0	0	0
13361	ENSG00000172086	0.00363169	0.00101507	6238.21	6238.21	KO up vs OCT4	70.6173	551073	4.2128	8.92699	383.728	279.403	1	0	0	0	0	0		0	0	0	0	0	0	0
13373	ENSG00000172156	0.00135974	0.000490687	25.7461	25.7461	KO up vs OCT4	5.61435	118.066	4.6078	11.444	56.8185	32.2718	1	0	0	0	0	0		0	0	0	0	0	0	0
13379	ENSG00000172175	0.00471635	0.00135891	8.82426	8.82426	KO up vs OCT4	2.76743	28.1372	4.0568	8.31904	23.945	18.7092	1	0	0	0	0	0		0	0	0	0	0	0	0
13380	ENSG00000172179	0.000879776	0.000675209	6252850000	6252850000	KO up vs OCT4	105252	371471000000000	4.43314	12.6871	3281.45	1681.19	1	0	0	0	0	0		0	0	0	0	0	0	0
13400	ENSG00000172262	0.0122555	0.00389587	5.60698	5.60698	KO up vs OCT4	1.93597	16.2391	3.50243	6.2943	15.2363	15.7343	1	0	0	0	0	0		0	0	0	0	0	0	0
13451	ENSG00000172432	0.00267598	0.00317949	15.7439	15.7439	KO up vs OCT4	3.02289	81.9973	3.60854	9.66908	56.3653	37.8913	1	0	0	0	0	0		0	0	0	0	0	0	0
13495	ENSG00000172661	0.00221243	0.00101293	8.05811	8.05811	KO up vs OCT4	2.7646	23.4874	4.21393	10.1493	24.8634	15.9236	1	0	0	0	0	0		0	0	0	0	0	0	0
13516	ENSG00000172757	0.00882354	0.00298162	344877000000000	344877000000000	KO up vs OCT4	821430	1.44796e+23	3.64216	6.95762	5871.55	5485.36	1	0	0	0	0	0		0	0	0	0	0	0	0
13523	ENSG00000172775	0.00388887	0.00177849	422.967	422.967	KO up vs OCT4	15.0206	11910.3	3.91399	8.76546	209.049	155.019	1	0	0	0	0	0		0	0	0	0	0	0	0
13526	ENSG00000172785	0.0059588	0.00168861	2.01412	2.01412	KO up vs OCT4	1.37218	2.95638	3.94144	7.79541	2.45777	2.04935	1	0	0	0	0	0		0	0	0	0	0	0	0
13527	ENSG00000172789	5.90975e-05	3.92996e-05	2.17304	2.17304	KO up vs OCT4	1.649	2.86362	6.076	22.5697	3.67916	1.05959	1	0	0	0	0	0		0	0	0	0	0	0	0
13553	ENSG00000172922	0.000706815	0.000194239	3.7546	3.7546	KO up vs OCT4	2.15017	6.55624	5.12727	13.3443	8.87606	4.32353	1	0	0	0	0	0		0	0	0	0	0	0	0
13555	ENSG00000172932	0.00034138	0.000108682	2.38554	2.38554	KO up vs OCT4	1.69154	3.36427	5.46354	15.6953	3.97079	1.64445	1	0	0	0	0	0		0	0	0	0	0	0	0
13570	ENSG00000172985	1.93214e-06	5.02003e-07	2.11846	2.11846	KO up vs OCT4	1.77422	2.5295	9.14549	42.7022	2.8744	0.437533	1	0	0	0	0	0		0	0	0	0	0	0	0
13572	ENSG00000172987	0.000767883	0.000337521	22.2226	22.2226	KO up vs OCT4	5.52774	89.3395	4.8152	13.0929	54.2541	26.9345	1	0	0	0	0	0		0	0	0	0	0	0	0
13583	ENSG00000173068	3.66435e-06	6.18533e-06	19.7144	19.7144	KO up vs OCT4	8.13814	47.7573	7.27952	38.0884	63.8267	10.8924	1	0	0	0	0	0		0	0	0	0	0	0	0
13593	ENSG00000173120	0.00116365	0.000567298	6.74102	6.74102	KO up vs OCT4	2.71235	16.7535	4.52818	11.8792	21.0757	11.5321	1	0	0	0	0	0		0	0	0	0	0	0	0
13619	ENSG00000173230	0.0131219	0.00400458	1580.17	1580.17	KO up vs OCT4	16.5029	151303	3.48808	6.16054	274.421	289.542	1	0	0	0	0	0		0	0	0	0	0	0	0
13626	ENSG00000173261	0.00141421	0.000463244	2.1228	2.1228	KO up vs OCT4	1.49515	3.01392	4.63951	11.3359	2.98117	1.7094	1	0	0	0	0	0		0	0	0	0	0	0	0
13656	ENSG00000173409	0.0194047	0.00723092	4.76662	4.76662	KO up vs OCT4	1.65031	13.7675	3.18073	5.42099	13.055	15.6535	1	0	0	0	0	0		0	0	0	0	0	0	0
13666	ENSG00000173457	0.00334339	0.000932485	2.82742e+23	2.82742e+23	KO up vs OCT4	358196000000	2.23183e+35	4.25843	9.12455	14657.9	10441.8	1	0	0	0	0	0		0	0	0	0	0	0	0
13673	ENSG00000173486	0.000350848	0.00029939	4538.71	4538.71	KO up vs OCT4	109.339	188404	4.8823	15.6021	463.65	193.161	1	0	0	0	0	0		0	0	0	0	0	0	0
13691	ENSG00000173581	0.00325924	0.00119203	3.14696	3.14696	KO up vs OCT4	1.72679	5.73511	4.12671	9.18595	7.08284	5.01183	1	0	0	0	0	0		0	0	0	0	0	0	0
13743	ENSG00000173852	0.00140942	0.000379957	4.8784	4.8784	KO up vs OCT4	2.3724	10.0315	4.74923	11.3452	12.6216	7.23129	1	0	0	0	0	0		0	0	0	0	0	0	0
13753	ENSG00000173905	0.000565895	0.000155279	53101.3	53101.3	KO up vs OCT4	606.592	4648500	5.25586	14.0349	600.851	278.273	1	0	0	0	0	0		0	0	0	0	0	0	0
13778	ENSG00000174021	0.00186831	0.000676605	682979000000	682979000000	KO up vs OCT4	1163520	4.00903e+17	4.43202	10.588	3998.75	2454.85	1	0	0	0	0	0		0	0	0	0	0	0	0
13798	ENSG00000174151	3.81874e-05	1.49588e-05	2.19619	2.19619	KO up vs OCT4	1.7034	2.83153	6.68889	24.5898	3.39844	0.898334	1	0	0	0	0	0		0	0	0	0	0	0	0
13814	ENSG00000174236	0.00544909	0.00168341	2.55245	2.55245	KO up vs OCT4	1.52753	4.26506	3.94307	7.99343	4.51007	3.66744	1	0	0	0	0	0		0	0	0	0	0	0	0
13879	ENSG00000174579	0.0128659	0.006242	16.8078	16.8078	KO up vs OCT4	2.5862	109.235	3.25713	6.19898	46.4843	48.7416	1	0	0	0	0	0		0	0	0	0	0	0	0
13887	ENSG00000174628	0.0111291	0.00352839	3.20728	3.20728	KO up vs OCT4	1.57937	6.51314	3.55413	6.48548	6.96679	6.98239	1	0	0	0	0	0		0	0	0	0	0	0	0
13902	ENSG00000174720	0.00337025	0.000946212	2482.38	2482.38	KO up vs OCT4	46.71	131925	4.25056	9.10533	307.66	219.628	1	0	0	0	0	0		0	0	0	0	0	0	0
13911	ENSG00000174780	0.0174312	0.00645515	21096.4	21096.4	KO up vs OCT4	27.5822	16135700	3.23968	5.61933	530.291	613.399	1	0	0	0	0	0		0	0	0	0	0	0	0
13918	ENSG00000174807	0.000102756	2.65882e-05	3.01735	3.01735	KO up vs OCT4	2.0686	4.40125	6.32002	20.1982	6.16173	1.98292	1	0	0	0	0	0		0	0	0	0	0	0	0
13931	ENSG00000174891	0.00693198	0.00205112	10.251	10.251	KO up vs OCT4	2.76641	37.9853	3.83867	7.46655	27.4209	23.8712	1	0	0	0	0	0		0	0	0	0	0	0	0
13934	ENSG00000174903	0.00170612	0.00132643	83179.6	83179.6	KO up vs OCT4	203.356	34023300	4.06969	10.8284	838.293	503.206	1	0	0	0	0	0		0	0	0	0	0	0	0
13976	ENSG00000175093	0.00893041	0.00286937	14.7438	14.7438	KO up vs OCT4	3.01471	72.106	3.66226	6.93272	37.3908	35.057	1	0	0	0	0	0		0	0	0	0	0	0	0
13984	ENSG00000175130	0.0240619	0.0130615	244929000000	244929000000	KO up vs OCT4	669.459	8.96102e+19	2.87325	5.03293	4188.62	5409.58	1	0	0	0	0	0		0	0	0	0	0	0	0
14030	ENSG00000175334	0.0165422	0.0121063	33336900	33336900	KO up vs OCT4	87.77	12662100000000	2.91282	5.71732	2020.05	2296.58	1	0	0	0	0	0		0	0	0	0	0	0	0
14037	ENSG00000175376	0.00036651	0.000123563	53.7369	53.7369	KO up vs OCT4	10.8783	265.451	5.38845	15.4541	84.4048	35.5007	1	0	0	0	0	0		0	0	0	0	0	0	0
14050	ENSG00000175467	0.000175851	7.73488e-05	487.396	487.396	KO up vs OCT4	46.0065	5163.5	5.66484	18.0801	215.609	77.514	1	0	0	0	0	0		0	0	0	0	0	0	0
14051	ENSG00000175470	0.000269071	0.000156576	3.84929	3.84929	KO up vs OCT4	2.21078	6.70217	5.25106	16.5231	10.8767	4.27876	1	0	0	0	0	0		0	0	0	0	0	0	0
14068	ENSG00000175550	0.00547238	0.00719081	819.254	819.254	KO up vs OCT4	8.63785	77701.9	3.18362	7.98392	354.161	288.336	1	0	0	0	0	0		0	0	0	0	0	0	0
14072	ENSG00000175573	0.0142667	0.00991965	11.7527	11.7527	KO up vs OCT4	2.0124	68.6377	3.01647	5.99866	39.9906	43.3329	1	0	0	0	0	0		0	0	0	0	0	0	0
14075	ENSG00000175582	5.10038e-05	1.52978e-05	33432	33432	KO up vs OCT4	1147.52	974013	6.6743	23.236	565.52	158.198	1	0	0	0	0	0		0	0	0	0	0	0	0
14083	ENSG00000175611	1.95569e-06	6.37896e-07	2.0864	2.0864	KO up vs OCT4	1.74718	2.49149	8.95423	42.6106	2.87175	0.438069	1	0	0	0	0	0		0	0	0	0	0	0	0
14109	ENSG00000175768	0.038578	0.0122771	98.1234	98.1234	KO up vs OCT4	3.24198	2969.85	2.90552	4.22506	105.169	161.796	1	0	0	0	0	0		0	0	0	0	0	0	0
14142	ENSG00000175920	0.000247759	7.45236e-05	2.40584	2.40584	KO up vs OCT4	1.72359	3.35815	5.68707	16.8173	4.00368	1.54745	1	0	0	0	0	0		0	0	0	0	0	0	0
14153	ENSG00000176014	0.00241859	0.000696105	11481	11481	KO up vs OCT4	118.587	1111530	4.41657	9.92262	444.146	290.946	1	0	0	0	0	0		0	0	0	0	0	0	0
14162	ENSG00000176046	0.00373961	0.00248742	383.775	383.775	KO up vs OCT4	12.3109	11963.6	3.73719	8.85765	224.317	164.61	1	0	0	0	0	0		0	0	0	0	0	0	0
14163	ENSG00000176049	0.03998	0.0129067	16.3551	16.3551	KO up vs OCT4	2.0095	133.112	2.87946	4.16632	39.2049	61.1647	1	0	0	0	0	0		0	0	0	0	0	0	0
14171	ENSG00000176087	0.00246531	0.00125531	20.4214	20.4214	KO up vs OCT4	4.16506	100.127	4.09908	9.87434	53.4264	35.1691	1	0	0	0	0	0		0	0	0	0	0	0	0
14183	ENSG00000176142	0.00030741	0.000119085	16.3336	16.3336	KO up vs OCT4	5.35383	49.8313	5.41	16.0561	42.7611	17.311	1	0	0	0	0	0		0	0	0	0	0	0	0
14202	ENSG00000176225	0.0143231	0.00614978	2.92809	2.92809	KO up vs OCT4	1.43828	5.96106	3.26486	5.99109	6.48122	7.03177	1	0	0	0	0	0		0	0	0	0	0	0	0
14251	ENSG00000176410	0.0110694	0.00388732	2.09339	2.09339	KO up vs OCT4	1.32742	3.30136	3.50357	6.49622	2.88579	2.88747	1	0	0	0	0	0		0	0	0	0	0	0	0
14256	ENSG00000176444	0.00531169	0.00276292	46.1396	46.1396	KO up vs OCT4	4.87212	436.948	3.68207	8.05049	87.0973	70.3227	1	0	0	0	0	0		0	0	0	0	0	0	0
14260	ENSG00000176473	5.88597e-05	1.65521e-05	2.30477	2.30477	KO up vs OCT4	1.75527	3.0263	6.62311	22.5878	3.58669	1.03213	1	0	0	0	0	0		0	0	0	0	0	0	0
14261	ENSG00000176476	0.00103062	0.000278474	123.2	123.2	KO up vs OCT4	14.8999	1018.68	4.92299	12.2256	116.784	62.0902	1	0	0	0	0	0		0	0	0	0	0	0	0
14284	ENSG00000176619	0.000460664	0.000126112	1134810000	1134810000	KO up vs OCT4	260932	4935330000000	5.37654	14.6953	2207.82	976.56	1	0	0	0	0	0		0	0	0	0	0	0	0
14331	ENSG00000176842	0.0105364	0.00351438	2.27658	2.27658	KO up vs OCT4	1.38114	3.75257	3.55621	6.59527	3.52617	3.47524	1	0	0	0	0	0		0	0	0	0	0	0	0
14341	ENSG00000176887	0.0180234	0.00777992	210.903	210.903	KO up vs OCT4	5.32674	8350.31	3.14272	5.5572	160.979	188.29	1	0	0	0	0	0		0	0	0	0	0	0	0
14375	ENSG00000176986	2.3912e-05	1.23501e-05	34.7456	34.7456	KO up vs OCT4	11.2822	107.005	6.81449	26.9115	72.8855	17.6042	1	0	0	0	0	0		0	0	0	0	0	0	0
14449	ENSG00000177352	0.0107785	0.00321419	29.0111	29.0111	KO up vs OCT4	3.851	218.552	3.60287	6.54958	57.1701	56.7373	1	0	0	0	0	0		0	0	0	0	0	0	0
14454	ENSG00000177370	0.000198437	6.91673e-05	41.4708	41.4708	KO up vs OCT4	10.1858	168.846	5.73175	17.6274	74.3796	27.4271	1	0	0	0	0	0		0	0	0	0	0	0	0
14475	ENSG00000177463	0.00932097	0.00490127	4.50096	4.50096	KO up vs OCT4	1.72222	11.7631	3.38284	6.84455	13.5218	12.8411	1	0	0	0	0	0		0	0	0	0	0	0	0
14483	ENSG00000177485	0.00321748	0.000873725	81.5304	81.5304	KO up vs OCT4	8.90428	746.519	4.29351	9.2171	96.7517	68.2304	1	0	0	0	0	0		0	0	0	0	0	0	0
14487	ENSG00000177508	0.000456583	0.000136445	7.42256	7.42256	KO up vs OCT4	3.29418	16.7248	5.33072	14.7243	20.8006	9.18234	1	0	0	0	0	0		0	0	0	0	0	0	0
14512	ENSG00000177628	0.0014143	0.000456914	6.36797	6.36797	KO up vs OCT4	2.69298	15.0581	4.6471	11.3358	17.973	10.3059	1	0	0	0	0	0		0	0	0	0	0	0	0
14562	ENSG00000177868	0.00942732	0.00309734	499.575	499.575	KO up vs OCT4	12.2774	20328.1	3.62224	6.82128	200.545	191.099	1	0	0	0	0	0		0	0	0	0	0	0	0
14565	ENSG00000177879	0.0434814	0.0141924	59.1269	59.1269	KO up vs OCT4	2.62546	1331.57	2.82993	4.02944	83.6634	134.96	1	0	0	0	0	0		0	0	0	0	0	0	0
14576	ENSG00000177951	0.000774838	0.000358037	3.12251	3.12251	KO up vs OCT4	1.86688	5.22268	4.78229	13.0657	7.39987	3.68132	1	0	0	0	0	0		0	0	0	0	0	0	0
14578	ENSG00000177963	0.0118461	0.003957	10.7917	10.7917	KO up vs OCT4	2.47958	46.9679	3.49431	6.36134	29.4526	30.0946	1	0	0	0	0	0		0	0	0	0	0	0	0
14647	ENSG00000178307	0.00465104	0.0096157	2.89218	2.89218	KO up vs OCT4	1.35726	6.16296	3.03265	8.35087	10.2314	7.96375	1	0	0	0	0	0		0	0	0	0	0	0	0
14654	ENSG00000178381	0.00383676	0.00152982	2.05818	2.05818	KO up vs OCT4	1.39287	3.04127	3.99381	8.79717	2.8709	2.12123	1	0	0	0	0	0		0	0	0	0	0	0	0
14677	ENSG00000178473	0.00688227	0.00193935	2.76153	2.76153	KO up vs OCT4	1.56593	4.86998	3.86823	7.48202	5.1545	4.47797	1	0	0	0	0	0		0	0	0	0	0	0	0
14683	ENSG00000178537	0.00423517	0.00132397	4.97134	4.97134	KO up vs OCT4	2.12248	11.644	4.07068	8.56642	13.283	10.0788	1	0	0	0	0	0		0	0	0	0	0	0	0
14707	ENSG00000178665	7.95238e-05	1.98044e-05	2.51637	2.51637	KO up vs OCT4	1.85235	3.41841	6.50745	21.2719	4.27371	1.30591	1	0	0	0	0	0		0	0	0	0	0	0	0
14713	ENSG00000178700	0.00147809	0.000392472	2.59714	2.59714	KO up vs OCT4	1.67969	4.01571	4.73123	11.2151	4.55949	2.64257	1	0	0	0	0	0		0	0	0	0	0	0	0
14727	ENSG00000178764	0.000105929	0.000616715	6.74573	6.74573	KO up vs OCT4	2.68829	16.9271	4.48252	20.0735	36.3697	11.7769	1	0	0	0	0	0		0	0	0	0	0	0	0
14749	ENSG00000178896	0.00054787	0.00024993	35.0526	35.0526	KO up vs OCT4	7.50141	163.794	4.98399	14.1374	71.9346	33.0736	1	0	0	0	0	0		0	0	0	0	0	0	0
14795	ENSG00000179071	6.15347e-07	2.31158e-07	3.296	3.296	KO up vs OCT4	2.53299	4.28885	9.78587	52.1723	7.74287	0.964661	1	0	0	0	0	0		0	0	0	0	0	0	0
14799	ENSG00000179085	0.0150925	0.00464009	140.142	140.142	KO up vs OCT4	6.12588	3206.02	3.41134	5.89093	123.55	136.324	1	0	0	0	0	0		0	0	0	0	0	0	0
14807	ENSG00000179115	0.00162181	0.00105704	1675.93	1675.93	KO up vs OCT4	36.4959	76960.9	4.19105	10.964	343.72	203.774	1	0	0	0	0	0		0	0	0	0	0	0	0
14828	ENSG00000179218	0.00371695	0.00115214	7.35544e+42	7.35544e+42	KO up vs OCT4	3.34256e+20	1.6186e+65	4.14491	8.87201	50263.5	36825.1	1	0	0	0	0	0		0	0	0	0	0	0	0
14836	ENSG00000179262	0.00159039	0.000704446	144.369	144.369	KO up vs OCT4	12.6361	1649.43	4.41009	11.0167	139.917	82.5534	1	0	0	0	0	0		0	0	0	0	0	0	0
14838	ENSG00000179271	0.00130104	0.0021635	605286000000	605286000000	KO up vs OCT4	126551	2.89503e+18	3.81056	11.5663	5856.96	3291.49	1	0	0	0	0	0		0	0	0	0	0	0	0
14885	ENSG00000179526	0.00351628	0.00095878	3.46987	3.46987	KO up vs OCT4	1.84178	6.53718	4.24346	9.00383	7.73215	5.58196	1	0	0	0	0	0		0	0	0	0	0	0	0
14931	ENSG00000179820	0.00262358	0.000715902	645.322	645.322	KO up vs OCT4	26.9534	15450.4	4.40133	9.71834	209.792	140.317	1	0	0	0	0	0		0	0	0	0	0	0	0
14949	ENSG00000179912	0.0403232	0.0136001	2.77783	2.77783	KO up vs OCT4	1.28122	6.02266	2.85218	4.1523	5.32289	8.33243	1	0	0	0	0	0		0	0	0	0	0	0	0
14962	ENSG00000179941	0.02539	0.00779845	4.59692	4.59692	KO up vs OCT4	1.61025	13.1232	3.14148	4.93799	11.6314	15.3106	1	0	0	0	0	0		0	0	0	0	0	0	0
14967	ENSG00000179965	0.02673	0.00939502	2.10977	2.10977	KO up vs OCT4	1.24215	3.58339	3.04472	4.84785	2.91203	3.90445	1	0	0	0	0	0		0	0	0	0	0	0	0
14980	ENSG00000180035	0.0382198	0.0124985	5.42432	5.42432	KO up vs OCT4	1.53665	19.1476	2.89621	4.24046	14.4402	22.1348	1	0	0	0	0	0		0	0	0	0	0	0	0
[truncated: 394 more rows]

## Sheet: PAX7 Up & KO Up Vs OCT4
Column #	Column ID	p-value(Attribute)	p-value(KO vs. OCT4)	Ratio(KO vs. OCT4)	Fold-Change(KO vs. OCT4)	Fold-Change(KO vs. OCT4) (Description)	Fold Change(KO vs. OCT4) 95% lower limit	Fold Change(KO vs. OCT4) 95% upper limit	T(KO vs. OCT4)	F(Attribute)	SS(Attribute)	SS(Error)	F(Error)	Column #	p-value(Attribute)	p-value(PAX7 vs. OCT4)	Ratio(PAX7 vs. OCT4)	Fold-Change(PAX7 vs. OCT4)	Fold-Change(PAX7 vs. OCT4) (Description)	Fold Change(PAX7 vs. OCT4) 95% lower limit	Fold Change(PAX7 vs. OCT4) 95% upper limit	T(PAX7 vs. OCT4)	F(Attribute)	SS(Attribute)	SS(Error)	F(Error)
[truncated: 2,590 more rows]

[truncated: 5 more sheets: GO Term BP PAX7&KO Up Vs OCT4, GO Term BP KO Up Only Vs OCT4, PAX7 Vs KO, GO Term BP PAX7 Up VS KO, GO Term BP PAX7 Down VS KO]
