# Supplementary material for: Transcriptional landscape of myogenesis from human pluripotent stem cells reveals a key role of TWIST1 in maintenance of skeletal muscle progenitors
Source: eLife. 2020 Feb 3;9:e46981. doi: 10.7554/eLife.46981 (PMC6996923; doi:10.7554/eLife.46981)
Supplement: Supplementary file 5. [file elife-46981-supp5.xlsx]

## Sheet: Primer
	Name		Sequences (5' to 3')
	AGGRECAN	Forward	CACTGTTACCGCCACTTCCC
		Reverse	ACCAGCGGAAGTCCCCTTCG
	DYSTROPHIN	Forward	GGCAAAAACTGCCAAAAGAA
		Reverse	TGGCAAACCACACTATTCCA
	FOXA2	Forward	CGACTGGAGCAGCTACTATGC
		Reverse	TACGTGTTCATGCCGTTCAT
v	FOXC1	Forward	ATCACCCTGAACGGCATCTA
		Reverse	ACGTACCGTTCTCGGTCTTG
v	FOXC2	Forward	AACGAGTGCTTCGTCAAGGT
		Reverse	GCAGGGTCATGATGTTCTCC
v	GAPDH	Forward	CGAGATCCCTCCAAAATCAA
		Reverse	TTCTAGACGGCAGGTCAGGT
	GATA2	Forward	ATCAAGCCCAAGCGAAGACT
		Reverse	CATGGTCAGTGGCCTGTTAAC
v	MIXL1	Forward	GGTACCCCGACATCCACTT
		Reverse	GCCTGTTCTGGAACCATACCT
v	MEF2C	Forward	TGGATGAACGTAACAGACAGG
		Reverse	ACTGTTGTGGCTGGACACTG
	MEOX1	Forward	AAAGTGTCCCCTGCATTCTG
		Reverse	CACTCCAGGGTTCCACATCT
v	MSGN1	Forward	AGCGAAGGCTGCAGTGTC
		Reverse	TGGCCTCTCTGGCTGTAGAC
v	MYF5	Forward	GCCTGAAGAAGGTCAACCAG
		Reverse	AGGTTGCTCTGAGGAGGTGA
v	MYH2	Forward	CCTGCTGTGCTGTACAACCT
		Reverse	GGTTGGCACTGATGATTTGA
	MYOD1	Forward	CCGCCTGAGCAAAGTAAATGA
		Reverse	GCAACCGCTGGTTTGGATT
	MYOG	Forward	GGTGCCCAGCGAATG
		Reverse	TGATGCTGTCCACGATCGA
	NANOG	Forward	CATGAGTGTGGATCCAGCTTG
		Reverse	CCTGAATAAGCAGATCCATGG
	OCT4	Forward	AGTGAGAGGCAACCTGGAGA
		Reverse	ACACTCGGACCACATCCTTC
	SOX10	Forward	GAAAGACCACCCGGACTACA
		Reverse	CCTCAGCTCTGTCATCAGCA
	SOX17	Forward	CGCACGGAATTTGAACAGTA
		Reverse	GGATCAGGGACCTGTCACAC
v	PARAXIS	Forward	CCTGGCGTCCAGCTACAT
		Reverse	CCCCTCACCTTCAAGCAG
	PAX3	Forward	TCCATACGTCCTGGTGCCAT
		Reverse	TTCTCCACGTCAGGCGTTG
	PAX6	Forward	CTTTGCTTGGGAAATCCGAG
		Reverse	AGCCAGGTTGCGAAGAACTC
	PAX7	Forward	AGGCCTTTGAGAGGACCCAC
		Reverse	CTGAACCAGACCTGCACACG
	RUNX1	Forward	ACTCGGCTGAGCTGAGAAAT
		Reverse	GACTTGCGGTGGGTTTGTG
v	SCLERAXIS	Forward	CTGGCCTCCAGCTACATCTC
		Reverse	CGGTCCTTGCTCAACTTTCT
	T	Forward	TGCTTCCCTGAGACCCAGTT
		Reverse	GATGACTTCTTTCCTTTGCATCAAG
	TBX6	Forward	AAGTACCAACCCCGCATACA
		Reverse	TAGGCTGTCACGGAGATGAA
	TTN	Forward	TCAAGACAAACCCGAATTGA
		Reverse	GAGGCACTTCAGGACCTGTG
